# Supplementary material for: Oxa-spirocycles: synthesis, properties and applications
Source: Royal Society of Chemistry journal article supplement (doi:10.1039/d1sc03615g), 2021-01-01
Supplement: d1sc03615g1.pdf [file d1sc03615g1.pdf]

## Supporting Information

### *Oxa-spirocycles: synthesis, properties and applications*

Kateryna Fominova,<sup>a</sup> Taras Diachuk,<sup>a</sup> Dmitry Granat,<sup>a</sup> Taras Savchuk,<sup>a</sup> Vladyslav Vilchinskiy,<sup>a</sup> Oleksiy Svitlychnyi,<sup>a</sup> Vladyslav Meliantsev,<sup>a</sup> Igor Kovalchuk,<sup>a</sup> Eduard Litskan,<sup>a</sup> Vadym V. Levterov,<sup>a</sup> Valentyn R. Badlo,<sup>a</sup> Ruslan I. Vaskevych,<sup>b</sup> Alla I. Vaskevych,<sup>c</sup> Andrii V. Bolbut,<sup>b</sup> Volodymyr V. Semeno,<sup>a</sup> Rustam Iminov,<sup>a</sup> Kostiantyn Shvydenko,<sup>b</sup> Anastasiia S. Kuznetsova,<sup>d</sup> Yurii V. Dmytriv,<sup>a,c</sup> Daniil Vysochyn,<sup>a</sup> Vasyl Ripenko,<sup>a</sup> Andrei A. Tolmachev,<sup>a</sup> Olexandra Pavlova,<sup>e</sup> Halyna Kuznietsova,<sup>e</sup> Iryna Pishel,<sup>e</sup> Petro Borysko,<sup>e</sup> Pavel K. Mykhailiuk<sup>a,\*</sup>

- 
- a Mrs. K. Fominova, Mr. T. Diachuk, Dr. D. Granat, Mr. T. Savchuk, Mr. V. Vilchinskiy, Mr. O. Svitlychnyi, Mr. V. Meliantsev, Mr. I. Kovalchuk, Mr. E. Litskan, Mr. V. V. Levterov, Mr. V. R. Badlo, Mr. V. V. Semeno, Mr. R. Iminov, Dr. Y. V. Dmytriv, Mr. V. Ripenko, Prof. A. A. Tolmachev, Dr. P. K. Mykhailiuk. Enamine Ltd; Chervonotkatska 78, 02094 Kyiv (Ukraine), [www.enamine.net](http://www.enamine.net), [www.mykhailiukchem.org](http://www.mykhailiukchem.org), E-mail: [Pavel.Mykhailiuk@gmail.com](mailto:Pavel.Mykhailiuk@gmail.com)
- b Mr. R. I. Vaskevych, Dr. A. V. Bolbut, Dr. K. Shvydenko  
Institute of Organic Chemistry, National Academy of Sciences of Ukraine, Murmanska St. 5, 02094 Kyiv (Ukraine).
- c Mrs. A. I. Vaskevych, Dr. Y. V. Dmytriv  
National Technical University of Ukraine, "Igor Sikorsky Kiev Polytechnic Institute," Prosp. Peremohy 37, 03056 Kyiv (Ukraine).
- d Dr. A. S. Kuznetsova, National Research Tomsk Polytechnic University, Lenin Ave. 30, 634050 Tomsk (Russia).
- e Mrs. H. Kuznietsova, Dr. I. Pishel, Dr. P. Borysko. Bienta, Chervonotkatska 78, 02094 Kyiv (Ukraine), [www.bienta.net](http://www.bienta.net).

## Table of Contents

|                                                                             |     |
|-----------------------------------------------------------------------------|-----|
| Experimental section. Data description and procedures .....                 | S7  |
| Experimental pKa values .....                                               | S66 |
| Determination of distribution coefficient (logD, pH 7.4) .....              | S68 |
| Analysis of aqueous solubility .....                                        | S71 |
| Biological activity (blood pressure tests) .....                            | S77 |
| Copies of <sup>1</sup> H, <sup>19</sup> F and <sup>13</sup> C spectra ..... | S82 |
| Compound 4a .....                                                           | S82 |
| Compound 5a .....                                                           | S85 |
| Compound 6a .....                                                           | S87 |
| Compound 7a .....                                                           | S89 |
| Compound 8a .....                                                           | S91 |
| Compound 9a .....                                                           | S93 |
| Compound 10a .....                                                          | S95 |
| Compound 11a .....                                                          | S97 |
| Compound 12a .....                                                          | S99 |
|                                                                             | S1  |

|                    |      |
|--------------------|------|
| Compound 13a ..... | S102 |
| Compound 14a ..... | S104 |
| Compound 15a ..... | S106 |
| Compound 16a ..... | S108 |
| Compound 17a ..... | S110 |
| Compound 18a ..... | S112 |
| Compound 19a ..... | S114 |
| Compound 20a ..... | S116 |
| Compound 21a ..... | S118 |
| Compound 22a ..... | S120 |
| Compound 23a ..... | S122 |
| Compound 24a ..... | S124 |
| Compound 25a ..... | S126 |
| Compound 26a ..... | S129 |
| Compound 27a ..... | S131 |
| Compound 28a ..... | S133 |
| Compound 29a ..... | S135 |
| Compound 30a ..... | S137 |
| Compound 31a ..... | S139 |
| Compound 32a ..... | S141 |
| Compound 33a ..... | S143 |
| Compound 34a ..... | S145 |
| Compound 35a ..... | S147 |
| Compound 36a ..... | S149 |
| Compound 37a ..... | S151 |
| Compound 38a ..... | S153 |
| Compound 39a ..... | S155 |
| Compound 40a ..... | S157 |
| Compound 41a ..... | S159 |
| Compound 42a ..... | S161 |
| Compound 43a ..... | S163 |
| Compound 44a ..... | S164 |
| Compound 45a ..... | S166 |
| Compound 46a ..... | S168 |
| Compound 48a ..... | S170 |

|                    |      |
|--------------------|------|
| Compound 4b .....  | S172 |
| Compound 5b .....  | S174 |
| Compound 6b .....  | S176 |
| Compound 7b .....  | S178 |
| Compound 8b .....  | S180 |
| Compound 9b .....  | S182 |
| Compound 10b ..... | S184 |
| Compound 11b ..... | S186 |
| Compound 12b ..... | S188 |
| Compound 13b ..... | S190 |
| Compound 14b ..... | S192 |
| Compound 15b ..... | S194 |
| Compound 16b ..... | S196 |
| Compound 17b ..... | S198 |
| Compound 18b ..... | S200 |
| Compound 19b ..... | S202 |
| Compound 20b ..... | S204 |
| Compound 21b ..... | S206 |
| Compound 22b ..... | S208 |
| Compound 23b ..... | S210 |
| Compound 24b ..... | S212 |
| Compound 25b ..... | S214 |
| Compound 26b ..... | S216 |
| Compound 27b ..... | S218 |
| Compound 28b ..... | S220 |
| Compound 29b ..... | S222 |
| Compound 30b ..... | S224 |
| Compound 31b ..... | S226 |
| Compound 32b ..... | S228 |
| Compound 33b ..... | S230 |
| Compound 34b ..... | S232 |
| Compound 35b ..... | S234 |
| Compound 36b ..... | S236 |
| Compound 37b ..... | S238 |
| Compound 38b ..... | S240 |

|                    |      |
|--------------------|------|
| Compound 39b ..... | S242 |
| Compound 40b ..... | S243 |
| Compound 41b ..... | S245 |
| Compound 42b ..... | S247 |
| Compound 43b ..... | S249 |
| Compound 44b ..... | S251 |
| Compound 5c .....  | S253 |
| Compound 6c .....  | S255 |
| Compound 7c .....  | S257 |
| Compound 8c .....  | S259 |
| Compound 9c .....  | S261 |
| Compound 13c ..... | S263 |
| Compound 14c ..... | S265 |
| Compound 22c ..... | S267 |
| Compound 23c ..... | S269 |
| Compound 24c ..... | S271 |
| Compound 27c ..... | S273 |
| Compound 30c ..... | S275 |
| Compound 31c ..... | S277 |
| Compound 34c ..... | S279 |
| Compound 36c ..... | S281 |
| Compound 4d .....  | S283 |
| Compound 5d .....  | S286 |
| Compound 6d .....  | S288 |
| Compound 8d .....  | S290 |
| Compound 9d .....  | S292 |
| Compound 11d ..... | S294 |
| Compound 12d ..... | S296 |
| Compound 13d ..... | S298 |
| Compound 18d ..... | S300 |
| Compound 21d ..... | S302 |
| Compound 23d ..... | S304 |
| Compound 27d ..... | S306 |
| Compound 34d ..... | S308 |
| Compound 35d ..... | S310 |



|                    |      |
|--------------------|------|
| Compound 36d ..... | S312 |
| Compound 40d ..... | S314 |
| Compound 42d ..... | S316 |
| Compound 44d ..... | S318 |
| Compound 4e .....  | S320 |
| Compound 5e .....  | S323 |
| Compound 6e .....  | S325 |
| Compound 8e .....  | S327 |
| Compound 9e .....  | S329 |
| Compound 11e ..... | S331 |
| Compound 13e ..... | S333 |
| Compound 16e ..... | S335 |
| Compound 18e ..... | S337 |
| Compound 21e ..... | S339 |
| Compound 22e ..... | S341 |
| Compound 23e ..... | S343 |
| Compound 24e ..... | S345 |
| Compound 27e ..... | S347 |
| Compound 30e ..... | S349 |
| Compound 36e ..... | S351 |
| Compound 38e ..... | S353 |
| Compound 5f.....   | S355 |
| Compound 6f.....   | S357 |
| Compound 8f.....   | S359 |
| Compound 9f.....   | S361 |
| Compound 13f.....  | S363 |
| Compound 18f.....  | S365 |
| Compound 21f.....  | S367 |
| Compound 29f.....  | S369 |
| Compound 34f.....  | S371 |
| Compound 35f.....  | S373 |
| Compound 36f.....  | S375 |
| Compound 38f.....  | S377 |
| Compound 40f.....  | S379 |
| Compound 44f.....  | S381 |

|                                     |      |
|-------------------------------------|------|
| Compound 8g .....                   | S383 |
| Compound 35g .....                  | S385 |
| Compound 45g .....                  | S387 |
| Compound 46g .....                  | S389 |
| Compound 47g .....                  | S391 |
| Compound 48g .....                  | S393 |
| Compound 6h .....                   | S395 |
| Compound 18h .....                  | S397 |
| Compound 36h .....                  | S399 |
| Compound 7i .....                   | S401 |
| Compound 50 .....                   | S403 |
| Compound 18j .....                  | S413 |
| Compound 14j .....                  | S415 |
| Compound 34j .....                  | S417 |
| Compound 36j .....                  | S419 |
| Compound 21j .....                  | S421 |
| Compound 75 .....                   | S422 |
| Compound 76 .....                   | S423 |
| Compound 77 .....                   | S424 |
| Compound 78 .....                   | S425 |
| Compound 79 .....                   | S426 |
| Crystallographic data (X-Ray) ..... | S427 |

## Experimental Section. Data description and procedures

**General Considerations.** All chemicals were provided by Enamine Ltd. ([www.enamine.net](http://www.enamine.net)). All solvents were treated according to standard methods. All reactions were monitored by thin-layer chromatography (TLC) and were visualized using UV light. Product purification was performed using silica gel column chromatography. TLC-characterization was performed with pre-coated silica gel GF254 (0.2 mm), while column chromatography characterization was performed with silica gel (100-200 mesh).  $^1\text{H}$ -NMR spectra were recorded at 400, 500 or 600 MHz (Varian);  $^{19}\text{F}$ -NMR spectra were recorded at 376 MHz (Varian) and  $^{13}\text{C}$  NMR spectra were recorded at 100, 126 or 151 MHz (Varian).  $^1\text{H}$ -NMR chemical shifts are calibrated using residual undeuterated solvents  $\text{CHCl}_3$  ( $\delta = 7.26$  ppm) or DMSO ( $\delta = 2.50$  ppm).  $^{13}\text{C}$ -NMR chemical shifts for  $^{13}\text{C}$ -NMR are reported relative to the central  $\text{CHCl}_3$  ( $\delta = 77.16$  ppm) or DMSO ( $\delta = 39.52$  ppm). Coupling constants are given in Hz. High-resolution mass spectra (HRMS) were recorded on an Agilent LC/MSD TOF mass spectrometer by electrospray ionization time of flight reflectron experiments.

All starting materials for iodocyclization were taken from stock at Enamine Ltd. ([www.enamine.net](http://www.enamine.net)). >80% of them could be obtained following these sequences:

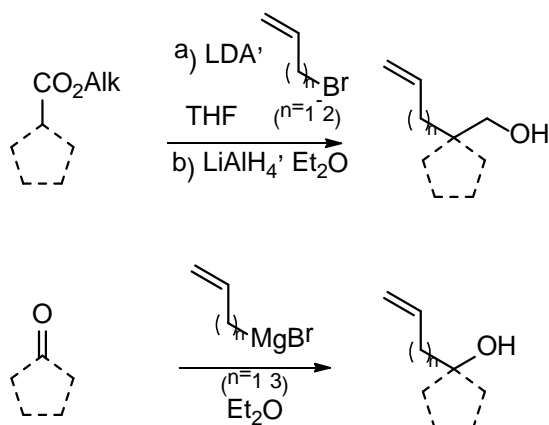

**General procedure A for synthesis 4a-31a** (4a as an example. Scale: 0.1 mol for all derivatives).

*Note:* Boc-derivatives **8a**, **10a**, **14a**, **16a**, **17a**, **21a** and **29a** were purified via column chromatography; eluent: hexane.

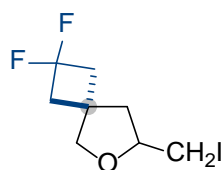

**2,2-Difluoro-7-(iodomethyl)-6-oxaspiro[3.4]octane (4a)**

In a flask fitted with a magnetic bar, (16.2 g, 0.1 mol, 1.0 equiv) of alcohol was dissolved in 150 mL of dry CH<sub>3</sub>CN under an argon atmosphere, and (25.2 g, 0.3 mol, 3.0 equiv) of NaHCO<sub>3</sub> was added. The resulting mixture was stirred at room temperature for 5 min and cooled to 0 °C, then I<sub>2</sub> (76.2 g, 0.3 mol, 3.0 equiv) was added. The reaction mixture was left to warm to room temperature for 1 h. The mixture was diluted with MTBE and washed with a 10% sodium thiosulfate solution until the color disappeared. The aqueous layer was extracted several times with MTBE. The combined extracts were dried over Na<sub>2</sub>SO<sub>4</sub>, filtered, and concentrated under reduced pressure. The final product was purified by distillation. Yield: 26.2 g, 91%, brown oil. <sup>1</sup>H NMR (400 MHz, CDCl<sub>3</sub>) δ = 4.11 – 4.00 (m, 1H), 3.93 (d, *J* = 8.7 Hz, 1H), 3.85 (d, *J* = 8.7 Hz, 1H), 3.31 – 3.17 (m, 2H), 2.69 – 2.48 (m, 4H), 2.28 (dd, *J* = 12.9, 6.6 Hz, 1H), 1.86 (dd, *J* = 12.8, 8.0 Hz, 1H) ppm. <sup>13</sup>C NMR (126 MHz, CDCl<sub>3</sub>) δ = 119.0 (t, *J* = 278.2 Hz), 78.6 (dd, *J* = 5.3, 2.0 Hz), 78.3, 46.0 (t, *J* = 22.6 Hz), 45.0 (d, *J* = 3.4 Hz), 43.8 (t, *J* = 23.1 Hz), 35.6 (t, *J* = 9.9 Hz), 9.7 ppm. <sup>19</sup>F NMR (376 MHz, CDCl<sub>3</sub>) δ = -91.5 (dd, *J* = 538.9, 196.2 Hz) ppm. GCMS (M): 288. HRMS (ESI): calc'd for C<sub>8</sub>H<sub>12</sub>F<sub>2</sub>IO [M+H]<sup>+</sup> 288.9901; found 288.9905.

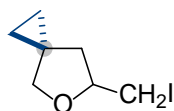

#### 6-(Iodomethyl)-5-oxaspiro[2.4]heptane (5a)

General procedure A was used. Yield: 19.5 g, 82%, brown oil. <sup>1</sup>H NMR (400 MHz, CDCl<sub>3</sub>) δ = 4.30 – 4.16 (m, 1H), 3.82 (d, *J* = 8.0 Hz, 1H), 3.68 (d, *J* = 8.0 Hz, 1H), 3.39 – 3.17 (m, 2H), 2.01 (dd, *J* = 12.4, 6.6 Hz, 1H), 1.81 (dd, *J* = 12.4, 6.8 Hz, 1H), 0.73 – 0.46 (m, 4H) ppm. <sup>13</sup>C NMR (126 MHz, CDCl<sub>3</sub>) δ = 79.5, 75.9, 41.1, 22.5, 10.8, 10.4, 10.1 ppm. GCMS (M): 238. HRMS (ESI): calc'd for C<sub>7</sub>H<sub>12</sub>IO [M+H]<sup>+</sup> 238.9933; found 238.9930.

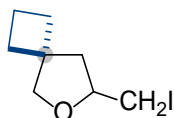

#### 7-(Iodomethyl)-6-oxaspiro[3.4]octane (6a)

General procedure A was used. Yield: 23.2 g, 92%, yellow oil. <sup>1</sup>H NMR (400 MHz, CDCl<sub>3</sub>) δ = 4.11 – 3.94 (m, 1H), 3.91 – 3.69 (m, 2H), 3.21 (qd, *J* = 9.8, 6.1 Hz, 2H), 2.20 (dd, *J* = 12.5, 6.4 Hz, 1H), 2.07 – 1.48 (m, 7H), 1.70 (dd, *J* = 12.5, 7.9 Hz, 1H) ppm. <sup>13</sup>C NMR (126 MHz, CDCl<sub>3</sub>) δ = 79.7, 78.4, 46.6, 45.6, 33.1, 30.9, 16.6, 10.6 ppm. GCMS (M): 252. HRMS (ESI): calc'd for C<sub>8</sub>H<sub>14</sub>IO [M+H]<sup>+</sup> 253.0089; found 253.0082.

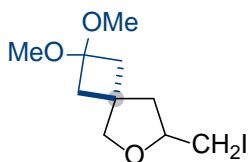

### 7-(Iodomethyl)-2,2-dimethoxy-6-oxaspiro[3.4]octane (7a)

General procedure A was used. Yield: 23.4 g, 75%, yellow oil.  $^1\text{H}$  NMR (400 MHz,  $\text{CDCl}_3$ )  $\delta$  = 4.10 – 3.96 (m, 1H), 3.86 (d,  $J$  = 8.5 Hz, 1H), 3.80 (d,  $J$  = 8.5 Hz, 1H), 3.27 – 3.18 (m, 2H), 3.14 (s, 3H), 3.12 (s, 3H), 2.26 – 2.07 (m, 5H), 1.77 (dd,  $J$  = 12.7, 7.9 Hz, 1H) ppm.  $^{13}\text{C}$  NMR (126 MHz,  $\text{CDCl}_3$ )  $\delta$  = 99.4, 79.6, 78.4, 48.7, 48.7, 45.8, 42.8, 40.7, 37.1, 10.3 ppm. HRMS (ESI): calc'd for  $\text{C}_{10}\text{H}_{18}\text{IO}_3$   $[\text{M}+\text{H}]^+$  313.0301; found 313.0307.

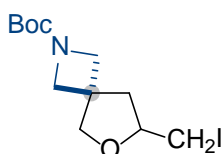

### Tert-butyl 7-(iodomethyl)-6-oxa-2-azaspiro[3.4]octane-2-carboxylate (8a)

General procedure A was used. Yield: 29.3 g, 83%, yellow oil.  $^1\text{H}$  NMR (400 MHz,  $\text{CDCl}_3$ )  $\delta$  = 4.05 – 3.98 (m, 2H), 3.95 – 3.82 (m, 5H), 3.26 – 3.15 (m, 2H), 2.34 (dd,  $J$  = 13.0, 6.7 Hz, 1H), 1.92 (dd,  $J$  = 13.0, 7.7 Hz, 1H), 1.43 (s, 9H) ppm.  $^{13}\text{C}$  NMR (126 MHz,  $\text{CDCl}_3$ )  $\delta$  = 156.3, 79.9, 78.3, 77.8, 59.7 (br s), 58.2 (br s), 43.8, 41.0, 28.5, 9.7 ppm. LCMS ( $\text{M}+\text{H}$ ) $^+$ : 354. HRMS (ESI): calc'd for  $\text{C}_{12}\text{H}_{21}\text{INO}_3$   $[\text{M}+\text{H}]^+$  354.0566; found 354.0560.

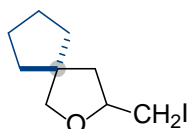

### 3-(Iodomethyl)-2-oxaspiro[4.4]nonane (9a)

General procedure A was used. Yield: 24.7 g, 93%, yellow oil.  $^1\text{H}$  NMR (400 MHz,  $\text{CDCl}_3$ )  $\delta$  = 4.16 – 3.98 (m, 1H), 3.71 (d,  $J$  = 8.0 Hz, 1H), 3.63 (d,  $J$  = 8.0 Hz, 1H), 3.34 – 3.12 (m, 2H), 2.04 (dd,  $J$  = 12.3, 6.4 Hz, 1H), 1.86 – 1.26 (m, 9H) ppm.  $^{13}\text{C}$  NMR (126 MHz,  $\text{CDCl}_3$ )  $\delta$  = 79.4, 78.8, 51.6, 45.8, 37.8, 36.2, 24.9, 10.9 ppm. GCMS (M): 266. HRMS (ESI): calc'd for  $\text{C}_9\text{H}_{16}\text{IO}$   $[\text{M}+\text{H}]^+$  267.0246; found 267.0244.

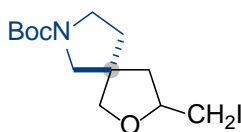

### Tert-butyl-3-(iodomethyl)-2-oxa-7-azaspiro[4.4]nonane-7-carboxylate (10a)

General procedure A was used. Yield: 30 g, 82%, yellow oil. Mixture of stereoisomers (d.r. = 5:1).  $^1\text{H}$  NMR (400 MHz,  $\text{CDCl}_3$ )  $\delta$  = 4.17 – 4.02 (m, 1H), 3.87 – 3.76 (m, 1H), 3.76 – 3.65 (m, 1H), 3.48 – 3.13 (m, 6H), 2.21 – 2.06 (m, 1H), 1.97 – 1.78 (m, 2H), 1.74 – 1.57 (m, 1H), 1.45 (s, 9H) ppm.  $^{13}\text{C}$  NMR (126 MHz,  $\text{CDCl}_3$ )  $\delta$  = 154.7, 154.6, 79.6, 78.5, 78.4, 76.8, 55.5 (br s), 50.2 (br s), 45.2, 45.1, 43.0, 42.8, 28.6, 10.1, 9.8 ppm. HRMS (ESI): calc'd for  $\text{C}_{13}\text{H}_{23}\text{INO}_3$   $[\text{M}+\text{H}]^+$  368.0723; found 368.0727.

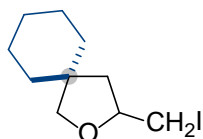

### 3-(Iodomethyl)-2-oxaspiro[4.5]decane (11a)

General procedure A was used. Yield: 26.6 g, 95%, yellow oil.  $^1\text{H}$  NMR (400 MHz,  $\text{CDCl}_3$ )  $\delta$  = 4.13 – 3.99 (m, 1H), 3.71 – 3.58 (m, 2H), 3.31 – 3.15 (m, 2H), 2.01 (dd,  $J$  = 12.6, 6.6 Hz, 1H), 1.49 – 1.36 (m, 11H) ppm.  $^{13}\text{C}$  NMR (126 MHz,  $\text{CDCl}_3$ )  $\delta$  = 79.0, 78.2, 44.9, 44.7, 36.5, 35.6, 26.1, 24.2, 23.5, 10.9 ppm. GCMS (M): 280. HRMS (ESI): calc'd for  $\text{C}_{10}\text{H}_{18}\text{IO}$   $[\text{M}+\text{H}]^+$  281.0402; found 281.0400.

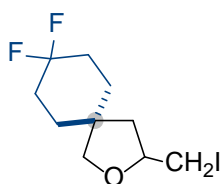

### 8,8-Difluoro-3-(iodomethyl)-2-oxaspiro[4.5]decane (12a)

General procedure A was used. Yield: 29.4 g, 93%, yellow oil.  $^1\text{H}$  NMR (400 MHz,  $\text{CDCl}_3$ )  $\delta$  = 4.12 – 4.01 (m, 1H), 3.74 (d,  $J$  = 8.6 Hz, 1H), 3.68 (d,  $J$  = 8.8 Hz, 1H), 3.33 – 3.19 (m, 2H), 2.06 (dd,  $J$  = 12.7, 6.7 Hz, 1H), 2.00 – 1.78 (m, 4H), 1.77 – 1.63 (m, 4H), 1.47 (dd,  $J$  = 12.7, 8.6 Hz, 1H) ppm.  $^{13}\text{C}$  NMR (126 MHz,  $\text{CDCl}_3$ )  $\delta$  = 123.1 (t,  $J$  = 241.0 Hz), 78.1, 77.8, 43.5, 43.5, 32.2 (t,  $J$  = 4.8 Hz), 31.9 (t,  $J$  = 24.3 Hz), 31.3 (t,  $J$  = 6.6 Hz), 31.3 (t,  $J$  = 24.4 Hz), 10.3 ppm.  $^{19}\text{F}$  NMR (376 MHz,  $\text{CDCl}_3$ )  $\delta$  = -98.2 (s) ppm. GCMS (M): 316. HRMS (ESI): calc'd for  $\text{C}_{10}\text{H}_{16}\text{F}_2\text{IO}$   $[\text{M}+\text{H}]^+$  317.0214; found 317.0218.

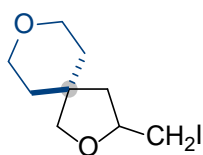

### 3-(Iodomethyl)-2,8-dioxaspiro[4.5]decane (13a)

General procedure A was used. Yield: 24.5 g, 87%, brown oil.  $^1\text{H}$  NMR (400 MHz,  $\text{CDCl}_3$ )  $\delta$  = 4.12 – 4.00 (m, 1H), 3.73 (s, 2H), 3.69 – 3.58 (m, 4H), 3.29 – 3.18 (m, 2H), 2.12 (dd,  $J$  = 12.7, 6.6

Hz, 1H), 1.66 – 1.52 (m, 4H), 1.47 (dd,  $J = 12.7, 8.6$  Hz, 1H) ppm.  $^{13}\text{C}$  NMR (126 MHz,  $\text{CDCl}_3$ )  $\delta = 78.4, 78.0, 65.8, 65.4, 44.4, 42.3, 36.2, 35.7, 10.5$  ppm. GCMS (M): 282. HRMS (ESI): calc'd for  $\text{C}_9\text{H}_{16}\text{IO}_2$   $[\text{M}+\text{H}]^+$  283.0195; found 283.0190.

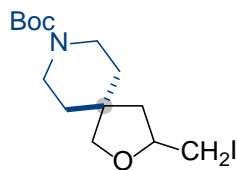

***Tert*-butyl 3-(iodomethyl)-2-oxa-8-azaspiro[4.5]decane-8-carboxylate (14a)**

General procedure A was used. Yield: 34.7 g, 91%, yellow oil.  $^1\text{H}$  NMR (400 MHz,  $\text{CDCl}_3$ )  $\delta = 4.13 - 4.01$  (m, 1H), 3.76 – 3.64 (m, 2H), 3.47 – 3.22 (m, 6H), 2.06 (dd,  $J = 12.7, 6.7$  Hz, 1H), 1.59 – 1.50 (m, 4H), 1.47 – 1.39 (m, 10H) ppm.  $^{13}\text{C}$  NMR (126 MHz,  $\text{CDCl}_3$ )  $\delta = 154.9, 79.7, 78.1, 78.0, 43.8, 43.2, 41.9, 41.3, 35.4, 34.7, 28.6, 10.4$  ppm. HRMS (ESI): calc'd for  $\text{C}_{14}\text{H}_{25}\text{INO}_3$   $[\text{M}+\text{H}]^+$  382.0879; found 382.0875.

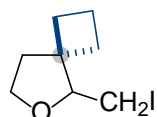

**5-(Iodomethyl)-6-oxaspiro[3.4]octane (15a)**

General procedure A was used. Yield: 14.9 g, 59%, yellow oil.  $^1\text{H}$  NMR (400 MHz,  $\text{CDCl}_3$ )  $\delta = 3.92 - 3.79$  (m, 2H), 3.78 – 3.67 (m, 1H), 3.32 (dd,  $J = 10.3, 3.7$  Hz, 1H), 3.05 (dd,  $J = 10.1, 8.6$  Hz, 1H), 2.22 – 1.73 (m, 8H) ppm.  $^{13}\text{C}$  NMR (126 MHz,  $\text{CDCl}_3$ )  $\delta = 85.5, 65.8, 48.7, 39.5, 33.2, 28.0, 16.8, 7.3$  ppm. GCMS (M): 252. HRMS (ESI): calc'd for  $\text{C}_8\text{H}_{14}\text{IO}$   $[\text{M}+\text{H}]^+$  253.0089; found 253.0093.

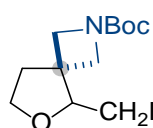

***Tert*-butyl 5-(iodomethyl)-6-oxa-2-azaspiro[3.4]octane-2-carboxylate (16a)**

General procedure A was used. Yield: 22.2 g, 63%, colorless oil.  $^1\text{H}$  NMR (400 MHz,  $\text{CDCl}_3$ )  $\delta = 4.09 - 3.68$  (m, 7H), 3.35 (dd,  $J = 10.6, 3.9$  Hz, 1H), 3.16 (dd,  $J = 10.5, 7.6$  Hz, 1H), 2.34 – 2.16 (m, 2H), 1.44 (s, 9H) ppm.  $^{13}\text{C}$  NMR (126 MHz,  $\text{CDCl}_3$ )  $\delta = 156.4, 83.6, 80.0, 65.8, 59.9, 55.0, 43.4, 39.1, 28.5, 5.2$  ppm. GCMS (M): 353. HRMS (ESI): calc'd for  $\text{C}_{12}\text{H}_{21}\text{INO}_3$   $[\text{M}+\text{H}]^+$  354.566; found 354.0564.

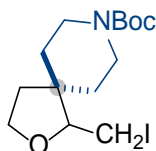

**Tert-butyl 1-(iodomethyl)-2-oxa-8-azaspiro[4.5]decane-8-carboxylate (17a)**

General procedure A was used. Yield: 27.1 g, 71%, yellow solid, mp = 96-97 °C.  $^1\text{H}$  NMR (400 MHz,  $\text{CDCl}_3$ )  $\delta$  = 4.06 – 3.82 (m, 4H), 3.72 (dd,  $J$  = 9.8, 2.9 Hz, 1H), 3.22 (dd,  $J$  = 10.4, 3.1 Hz, 1H), 3.09 (t,  $J$  = 10.1 Hz, 1H), 2.87 (t,  $J$  = 11.3 Hz, 2H), 2.08 – 1.98 (m, 1H), 1.88 – 1.77 (m, 1H), 1.62 – 1.54 (m, 1H), 1.50 – 1.33 (m, 12H) ppm.  $^{13}\text{C}$  NMR (126 MHz,  $\text{CDCl}_3$ )  $\delta$  = 154.8, 87.3, 79.8, 65.5, 44.6, 41.0, 34.8, 29.7, 28.6, 4.5 ppm. HRMS (ESI): calc'd for  $\text{C}_{14}\text{H}_{25}\text{INO}_3$   $[\text{M}+\text{H}]^+$  382.0879; found 382.0870.

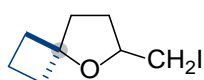

**6-(Iodomethyl)-5-oxaspiro[3.4]octane (18a)**

General procedure A was used. Yield: 21.9 g, 87%, yellow oil.  $^1\text{H}$  NMR (400 MHz,  $\text{CDCl}_3$ )  $\delta$  = 4.10 – 3.96 (m, 1H), 3.25 (dd,  $J$  = 9.8, 4.5 Hz, 1H), 3.09 (dd,  $J$  = 9.7, 7.7 Hz, 1H), 2.31 – 2.17 (m, 2H), 2.18 – 1.88 (m, 5H), 1.76 – 1.62 (m, 2H), 1.56 – 1.42 (m, 1H) ppm.  $^{13}\text{C}$  NMR (126 MHz,  $\text{CDCl}_3$ )  $\delta$  = 84.5, 78.4, 36.9, 36.7, 35.8, 31.5, 12.7, 11.3 ppm. GCMS (M): 252. HRMS (ESI): calc'd for  $\text{C}_8\text{H}_{14}\text{IO}$   $[\text{M}+\text{H}]^+$  253.0089; found 253.0086.

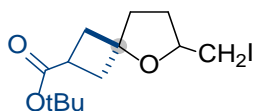

**Tert-butyl 6-(iodomethyl)-5-oxaspiro[3.4]octane-2-carboxylate (19a)**

General procedure A was used. Yield: 24.3 g, 69%, yellow oil. Mixture of stereoisomers (d.r. = 5:1).  $^1\text{H}$  NMR (400 MHz,  $\text{CDCl}_3$ )  $\delta$  = 4.08 – 3.93 (m, 1H), 3.25 (dd,  $J$  = 9.8, 4.2 Hz, 1H), 3.14 – 3.05 (m, 1H), 2.57 – 2.39 (m, 3H), 2.28 – 1.87 (m, 5H), 1.75 – 1.63 (m, 1H), 1.44, 1.42 (2xs, 9H) ppm.  $^{13}\text{C}$  NMR (126 MHz,  $\text{CDCl}_3$ )  $\delta$  = 175.3, 173.8, 83.3, 80.4, 80.0, 78.6, 78.4, 40.5, 39.29, 39.25, 38.4, 37.8, 36.7, 31.6, 31.5, 31.3, 30.6, 28.2, 11.1 ppm. HRMS (ESI): calc'd for  $\text{C}_{13}\text{H}_{22}\text{IO}_3$   $[\text{M}+\text{H}]^+$  353.0614; found 353.0610.

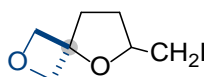

**6-(Iodomethyl)-2,5-dioxaspiro[3.4]octane (20a)**

General procedure A was used. Yield: 11.4 g, 45%, yellow oil.  $^1\text{H}$  NMR (400 MHz,  $\text{CDCl}_3$ )  $\delta$  = 4.79 (t,  $J$  = 7.0 Hz, 2H), 4.50 (d,  $J$  = 6.6 Hz, 2H), 4.06 – 3.93 (m, 1H), 3.25 (dd,  $J$  = 10.1, 4.3 Hz,



1H), 3.15 (dd,  $J = 10.1, 6.8$  Hz, 1H), 2.43 – 2.28 (m, 1H), 2.24 – 2.05 (m, 2H), 1.79 – 1.61 (m, 1H) ppm.  $^{13}\text{C}$  NMR (126 MHz,  $\text{CDCl}_3$ )  $\delta = 84.7, 83.5, 83.3, 79.0, 35.4, 31.6, 10.6$  ppm. HRMS (ESI): calc'd for  $\text{C}_7\text{H}_{12}\text{IO}_2$   $[\text{M}+\text{H}]^+$  254.9882; found 254.9885.

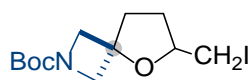

#### **Tert-butyl 6-(iodomethyl)-5-oxa-2-azaspiro[3.4]octane-2-carboxylate (21a)**

General procedure A was used. Yield: 26.1 g, 74%, yellow oil.  $^1\text{H}$  NMR (400 MHz,  $\text{CDCl}_3$ )  $\delta = 4.10 - 3.96$  (m, 3H), 3.83 (dd,  $J = 9.0, 2.8$  Hz, 2H), 3.26 (dd,  $J = 10.1, 4.4$  Hz, 1H), 3.16 (dd,  $J = 10.1, 6.8$  Hz, 1H), 2.28 – 2.01 (m, 3H), 1.80 – 1.64 (m, 1H), 1.42 (s, 9H) ppm.  $^{13}\text{C}$  NMR (126 MHz,  $\text{CDCl}_3$ )  $\delta = 156.5, 79.7, 79.2, 79.1, 62.9, 61.9, 36.2, 31.7, 28.5, 10.3$  ppm. HRMS (ESI): calc'd for  $\text{C}_{12}\text{H}_{21}\text{INO}_3$   $[\text{M}+\text{H}]^+$  354.0566; found 354.0560.

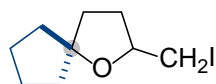

#### **2-(Iodomethyl)-1-oxaspiro[4.4]nonane (22a)**

General procedure A was used. Yield: 24.5 g, 92%, brown oil.  $^1\text{H}$  NMR (400 MHz,  $\text{CDCl}_3$ )  $\delta = 4.24 - 4.04$  (m, 1H), 3.43 (dd,  $J = 9.9, 4.5$  Hz, 1H), 3.29 (dd,  $J = 9.8, 7.3$  Hz, 1H), 2.23 – 2.04 (m, 1H), 1.91 – 1.66 (m, 7H), 1.67 – 1.49 (m, 4H) ppm.  $^{13}\text{C}$  NMR (126 MHz,  $\text{CDCl}_3$ )  $\delta = 92.8, 77.6, 39.1, 38.4, 36.4, 36.4, 31.0, 24.2$  ppm. HRMS (ESI): calc'd for  $\text{C}_9\text{H}_{16}\text{IO}$   $[\text{M}+\text{H}]^+$  267.0246; found 267.0249.

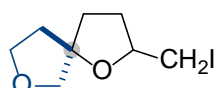

#### **2-(Iodomethyl)-1,7-dioxaspiro[4.4]nonane (23a)**

General procedure A was used. Yield: 21.2 g, 81%, brown oil. Mixture of stereoisomers (d.r. = 1:1).  $^1\text{H}$  NMR (400 MHz,  $\text{CDCl}_3$ )  $\delta = 4.27 - 4.14$  (m, 1H), 4.01 – 3.83 (m, 2H), 3.83 – 3.73 (m, 1H), 3.60 (dd,  $J = 41.3, 9.2$  Hz, 1H), 3.51 – 3.41 (m, 1H), 3.39 – 3.26 (m, 1H), 2.24 – 1.73 (m, 6H) ppm.  $^{13}\text{C}$  NMR (151 MHz,  $\text{CDCl}_3$ )  $\delta = 90.7, 90.65, 78.1, 78.0, 77.5, 77.1, 68.0, 39.3, 38.8, 35.9, 35.8, 34.0, 33.5, 30.8, 30.7$  ppm. HRMS (ESI): calc'd for  $\text{C}_8\text{H}_{14}\text{IO}_2$   $[\text{M}+\text{H}]^+$  269.0038; found 269.0031.

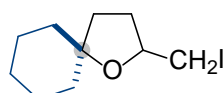

#### **2-(Iodomethyl)-1-oxaspiro[4.5]decane (24a)**

General procedure A was used. Yield: 25.2 g, 90%, yellow oil.  $^1\text{H}$  NMR (400 MHz,  $\text{CDCl}_3$ )  $\delta = 4.25 - 4.13$  (m, 1H), 3.44 (dd,  $J = 9.9, 4.5$  Hz, 1H), 3.29 (dd,  $J = 9.9, 7.3$  Hz, 1H), 2.17 – 2.03 (m,

1H), 1.87 – 1.61 (m, 5H), 1.60 – 1.45 (m, 4H), 1.42 – 1.22 (m, 4H) ppm. <sup>13</sup>C NMR (126 MHz, CDCl<sub>3</sub>) δ = 83.8, 76.8, 38.0, 36.9, 35.9, 35.0, 29.8, 25.1, 23.5, 23.3 ppm. HRMS (ESI): calc'd for C<sub>10</sub>H<sub>18</sub>IO [M+H]<sup>+</sup> 281.0402; found 281.0407.

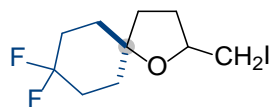

### 8,8-Difluoro-2-(iodomethyl)-1-oxaspiro[4.5]decane (25a)

General procedure A was used. Yield: 26.9 g, 85%, brown oil. <sup>1</sup>H NMR (400 MHz, CDCl<sub>3</sub>) δ = 4.04 – 3.86 (m, 1H), 3.28 (dd, *J* = 10.0, 4.3 Hz, 1H), 3.19 (dd, *J* = 9.9, 6.8 Hz, 1H), 2.28 – 2.01 (m, 3H), 1.95 – 1.58 (m, 9H) ppm. <sup>13</sup>C NMR (126 MHz, CDCl<sub>3</sub>) δ = 123.6 (dd, *J* = 242.3, 239.1 Hz), 81.7, 77.8, 36.6, 34.5 (d, *J* = 8.2 Hz), 33.4 (d, *J* = 8.6 Hz), 31.8, 30.8 (t, *J* = 24.4 Hz), 11.5 ppm. <sup>19</sup>F NMR (376 MHz, CDCl<sub>3</sub>) δ = -94.1 (d, *J* = 238.1 Hz), -103.4 (d, *J* = 233.7 Hz) ppm. GCMS (M): 316. HRMS (ESI): calc'd for C<sub>10</sub>H<sub>16</sub>F<sub>2</sub>IO [M+H]<sup>+</sup> 317.0214; found 317.0210.

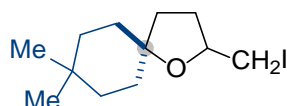

### 2-(Iodomethyl)-8,8-dimethyl-1-oxaspiro[4.5]decane (26a)

General procedure A was used. Yield: 27.1 g, 88%, brown oil. <sup>1</sup>H NMR (400 MHz, CDCl<sub>3</sub>) δ = 4.04 – 3.94 (m, 1H), 3.29 (dd, *J* = 9.7, 4.1 Hz, 1H), 3.13 (dd, *J* = 9.7, 7.7 Hz, 1H), 2.20 – 2.01 (m, 1H), 1.85 – 1.38 (m, 9H), 1.28 – 1.11 (m, 2H), 0.92 (s, 3H), 0.88 (s, 3H) ppm. <sup>13</sup>C NMR (126 MHz, CDCl<sub>3</sub>) δ = 84.6, 77.5, 36.8, 36.6, 35.8, 34.7, 33.6, 31.9, 29.7, 28.4 (br s), 11.9 ppm. GCMS (M): 308. HRMS (ESI): calc'd for C<sub>12</sub>H<sub>22</sub>IO [M+H]<sup>+</sup> 309.0715; found 309.0711.

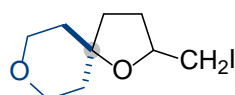

### 2-(Iodomethyl)-1,8-dioxaspiro[4.5]decane (27a)

General procedure A was used. Yield: 22.8 g, 81%, brown oil. <sup>1</sup>H NMR (400 MHz, CDCl<sub>3</sub>) δ = 4.26 – 4.16 (m, 1H), 3.86 – 3.70 (m, 2H), 3.69 – 3.53 (m, 2H), 3.44 (dd, *J* = 10.1, 4.3 Hz, 1H), 3.33 (dd, *J* = 10.0, 6.9 Hz, 1H), 2.19 – 2.03 (m, 1H), 1.92 – 1.72 (m, 3H), 1.71 – 1.55 (m, 4H) ppm. <sup>13</sup>C NMR (126 MHz, CDCl<sub>3</sub>) δ = 80.4, 76.9, 64.9, 64.8, 38.0, 37.0, 35.9, 35.7, 29.3 ppm. HRMS (ESI): calc'd for C<sub>9</sub>H<sub>16</sub>IO<sub>2</sub> [M+H]<sup>+</sup> 283.0195; found 283.0197.

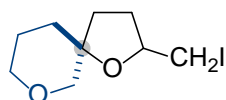

### 2-(Iodomethyl)-1,7-dioxaspiro[4.5]decane (28a)

General procedure A was used. Yield: 22.3 g, 79%, brown oil. Mixture of stereoisomers (d.r. = 1:1).  $^1\text{H}$  NMR (400 MHz,  $\text{CDCl}_3$ )  $\delta$  = 4.09 – 3.97 (m, 1H), 3.72 – 3.25 (m, 5H), 3.22 – 3.08 (m, 1H), 2.22 – 1.50 (m, 8H) ppm.  $^{13}\text{C}$  NMR (126 MHz,  $\text{CDCl}_3$ )  $\delta$  = 81.38, 81.35, 78.2, 78.1, 77.2, 75.2, 74.4, 67.9, 67.9, 35.9, 35.4, 34.1, 33.6, 31.9, 31.4, 24.3, 24.2, 11.4, 10.8 ppm. GCMS (M): 282. HRMS (ESI): calc'd for  $\text{C}_9\text{H}_{16}\text{IO}_2$   $[\text{M}+\text{H}]^+$  283.0195; found 283.0191.

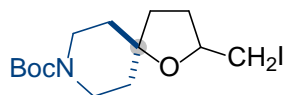

#### ***Tert*-butyl 2-(iodomethyl)-1-oxa-8-azaspiro[4.5]decane-8-carboxylate (29a)**

General procedure A was used. Yield: 35.8 g, 94%, yellow oil.  $^1\text{H}$  NMR (400 MHz,  $\text{CDCl}_3$ )  $\delta$  = 4.06 – 3.95 (m, 1H), 3.64 – 3.51 (m, 2H), 3.38 – 3.25 (m, 3H), 3.17 (dd,  $J$  = 9.9, 7.1 Hz, 1H), 2.23 – 2.10 (m, 1H), 1.84 – 1.48 (m, 7H), 1.44 (s, 9H) ppm.  $^{13}\text{C}$  NMR (126 MHz,  $\text{CDCl}_3$ )  $\delta$  = 155.0, 81.9, 79.5, 77.7, 41.3, 41.2, 37.8, 36.7, 36.6, 31.6, 28.6, 11.5 ppm. HRMS (ESI): calc'd for  $\text{C}_{14}\text{H}_{25}\text{INO}_3$   $[\text{M}+\text{H}]^+$  382.0879; found 382.0877.

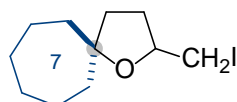

#### **2-(Iodomethyl)-1-oxaspiro[4.6]undecane (30a)**

General procedure A was used. Yield: 27.9 g, 95%, yellow oil.  $^1\text{H}$  NMR (400 MHz,  $\text{CDCl}_3$ )  $\delta$  = 4.21 – 4.09 (m, 1H), 3.43 (dd,  $J$  = 9.9, 4.3 Hz, 1H), 3.29 (dd,  $J$  = 9.9, 7.2 Hz, 1H), 2.15 – 2.04 (m, 1H), 1.78 – 1.31 (m, 14H) ppm.  $^{13}\text{C}$  NMR (126 MHz,  $\text{CDCl}_3$ )  $\delta$  = 88.1, 77.5, 41.6, 40.5, 37.7, 36.5, 30.3, 29.5, 29.5, 23.3, 23.0 ppm. HRMS (ESI): calc'd for  $\text{C}_{11}\text{H}_{20}\text{IO}$   $[\text{M}+\text{H}]^+$  295.0559; found 295.0555.

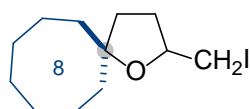

#### **2-(Iodomethyl)-1-oxaspiro[4.7]dodecane (31a)**

General procedure A was used. Yield: 29.6 g, 96%, brown oil.  $^1\text{H}$  NMR (400 MHz,  $\text{CDCl}_3$ )  $\delta$  = 4.03 – 3.91 (m, 1H), 3.29 (dd,  $J$  = 9.6, 3.7 Hz, 1H), 3.18 – 3.04 (m, 1H), 2.19 – 2.04 (m, 1H), 1.85 – 1.40 (m, 17H) ppm.  $^{13}\text{C}$  NMR (126 MHz,  $\text{CDCl}_3$ )  $\delta$  = 88.2, 77.5, 37.0, 36.9, 35.9, 32.1, 28.5, 28.3, 24.8, 23.0, 22.7, 12.0 ppm. HRMS (ESI): calc'd for  $\text{C}_{12}\text{H}_{22}\text{IO}$   $[\text{M}+\text{H}]^+$  309.0715; found 309.0709.

#### **General procedure B for synthesis 32a and 33a (32a as an example)**

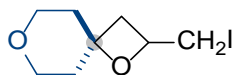

### 2-(Iodomethyl)-1,7-dioxaspiro[3.5]nonane (32a)

In a flask fitted with a magnetic bar, (10.6 g, 74.6 mmol, 1.0 equiv) of 4-allyltetrahydro-2*H*-pyran-4-ol was dissolved in 200 mL of dry CH<sub>3</sub>CN under an argon atmosphere, and (18.8 g, 223.8 mmol, 3.0 equiv) of NaHCO<sub>3</sub> was added. The resulting mixture was stirred at room temperature for 5 min, cooled to 0 °C and covered from light, then I<sub>2</sub> (56.8 g, 223.8 mmol, 3.0 equiv) was added. The reaction mixture was left to warm to room temperature and stirred overnight. The mixture was diluted with MTBE and washed with a 10% sodium thiosulfate solution until the color disappeared. The aqueous layer was extracted several times with MTBE. The combined extracts were washed with brine, dried over Na<sub>2</sub>SO<sub>4</sub>, filtered, and concentrated under reduced pressure. The final product was purified by column chromatography (hexane/EtOAc, 7:3). Yield: 4.8 g, 24%, yellow oil. <sup>1</sup>H NMR (400 MHz, CDCl<sub>3</sub>) δ = 4.71 – 4.57 (m, 1H), 3.82 – 3.70 (m, 2H), 3.62 – 3.45 (m, 2H), 3.43 – 3.31 (m, 1H), 3.25 (t, *J* = 9.0 Hz, 1H), 2.48 (dd, *J* = 11.2, 7.7 Hz, 1H), 2.06 (dd, *J* = 11.3, 6.7 Hz, 1H), 1.98 – 1.65 (m, 4H) ppm. <sup>13</sup>C NMR (126 MHz, CDCl<sub>3</sub>) δ = 78.2, 74.3, 64.4, 63.9, 40.5, 38.9, 38.4, 11.8 ppm. GCMS (M): 268. HRMS (ESI): calc'd for C<sub>8</sub>H<sub>14</sub>IO<sub>2</sub> [M+H]<sup>+</sup> 269.0038; found 269.0031.

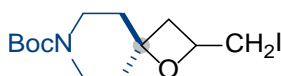

### Tert-butyl 2-(iodomethyl)-1-oxa-7-azaspiro[3.5]nonane-7-carboxylate (33a)

General procedure B was used. Scale: 0.1 mol. Yield: 7.7 g, 21%, beige solid. <sup>1</sup>H NMR (400 MHz, CDCl<sub>3</sub>) δ = 4.75 – 4.49 (m, 1H), 3.58 – 3.30 (m, 5H), 3.24 (t, *J* = 9.0 Hz, 1H), 2.45 (dd, *J* = 11.3, 7.6 Hz, 1H), 2.11 – 1.94 (m, 1H), 1.92 – 1.62 (m, 4H), 1.43 (s, 9H) ppm. <sup>13</sup>C NMR (126 MHz, CDCl<sub>3</sub>) δ = 154.8, 79.7, 79.1, 74.3, 40.7 (br s), 39.8 (br s), 38.5, 37.3, 28.5, 11.7 ppm. HRMS (ESI): calc'd for C<sub>13</sub>H<sub>23</sub>INO<sub>3</sub> [M+H]<sup>+</sup> 368.0723; found 368.0721.

**General procedure C** for synthesis **34a-48a** (**34a** as an example. Scale: 0.1 mol for all derivatives)

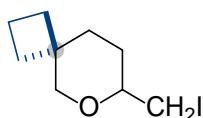

### 7-(Iodomethyl)-6-oxaspiro[3.5]nonane (34a)

In a flask fitted with a magnetic stirring bar, (14.0 g, 0.1 mol, 1.0 equiv) of (1-(but-3-en-1-yl)cyclobutyl)methanol was dissolved in 200 mL of dry CH<sub>3</sub>CN under an argon atmosphere, and (41.4 g, 0.3 mol, 3 equiv) of K<sub>2</sub>CO<sub>3</sub> was added. The resulting mixture was stirred at room temperature for 1 h, and (76.2 g, 0.3 mol, 3.0 equiv) of I<sub>2</sub> was added. The reaction mixture was left

to warm to room temperature for 24 h, then extra of  $K_2CO_3$  (13.8 g, 0.1 mol, 1.0 equiv) and  $I_2$  and (25.4 g, 0.1 mol, 1.0 equiv) were added to the mixture. The mixture was stirring for additional 24 h. The mixture was diluted with MTBE and washed with a 10% sodium thiosulfate solution until the color disappeared. The aqueous layer was extracted several times with MTBE. The combined extracts were dried, filtered, and concentrated under reduced pressure. Yield: 12.8 g, 48%, yellow oil.  $^1H$  NMR (400 MHz,  $CDCl_3$ )  $\delta$  = 3.90 (dd,  $J$  = 11.2, 2.2 Hz, 1H), 3.49 – 3.38 (m, 1H), 3.36 – 3.29 (m, 2H), 3.26 (d,  $J$  = 11.2 Hz, 1H), 2.09 – 1.93 (m, 1H), 1.94 – 1.82 (m, 3H), 1.82 – 1.69 (m, 1H), 1.69 – 1.50 (m, 3H), 1.50 – 1.21 (m, 2H) ppm.  $^{13}C$  NMR (126 MHz,  $CDCl_3$ )  $\delta$  = 76.8, 76.5, 37.9, 35.7, 35.4, 30.3, 28.9, 27.1, 15.4 ppm. HRMS (ESI): calc'd for  $C_9H_{16}IO$   $[M+H]^+$  267.0246; found 267.0249.

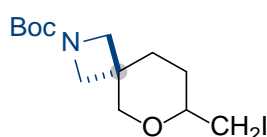

***Tert*-butyl 7-(iodomethyl)-6-oxa-2-azaspiro[3.5]nonane-2-carboxylate (35a)**

General procedure C was used. Yield: 23.1 g, 63%, beige solid, mp = 84-86 °C.  $^1H$  NMR (400 MHz,  $CDCl_3$ )  $\delta$  = 4.00 (dd,  $J$  = 11.4, 2.2 Hz, 1H), 3.83 (d,  $J$  = 8.5 Hz, 1H), 3.62 (d,  $J$  = 8.4 Hz, 1H), 3.56 – 3.38 (m, 3H), 3.30 – 3.19 (m, 1H), 3.21 – 3.08 (m, 2H), 2.07 – 1.89 (m, 1H), 1.88 – 1.72 (m, 1H), 1.69 – 1.53 (m, 1H), 1.42 (s, 9H), 1.36 – 1.21 (m, 1H) ppm.  $^{13}C$  NMR (126 MHz,  $CDCl_3$ )  $\delta$  = 156.5, 79.6, 76.4, 74.5, 58.5, 55.5, 33.5, 32.8, 28.5, 8.8 ppm. HRMS (ESI): calc'd for  $C_{13}H_{23}INO_3$   $[M+H]^+$  368.0723; found 368.0718.

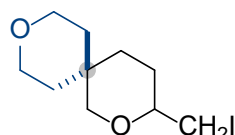

**3-(Iodomethyl)-2,9-dioxaspiro[5.5]undecane (36a)**

General procedure C was used. Yield: 17.8 g, 60%, yellow oil.  $^1H$  NMR (400 MHz,  $CDCl_3$ )  $\delta$  = 3.96 (dd,  $J$  = 11.5, 2.4 Hz, 1H), 3.75 – 3.60 (m, 3H), 3.60 – 3.52 (m, 1H), 3.52 – 3.43 (m, 1H), 3.38 (d,  $J$  = 5.3 Hz, 2H), 3.18 (d,  $J$  = 11.5 Hz, 1H), 1.88 (dd,  $J$  = 13.3, 3.0 Hz, 1H), 1.81 – 1.70 (m, 1H), 1.67 – 1.51 (m, 3H), 1.39 – 1.21 (m, 3H) ppm.  $^{13}C$  NMR (126 MHz,  $CDCl_3$ )  $\delta$  = 75.7, 64.0, 63.4, 35.9, 35.8, 34.0, 31.6, 30.3, 25.7 ppm. HRMS (ESI): calc'd for  $C_{10}H_{18}IO_2$   $[M+H]^+$  297.0351; found 297.0347.

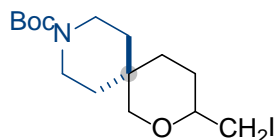

***Tert*-butyl 3-(iodomethyl)-2-oxa-9-azaspiro[5.5]undecane-9-carboxylate (37a)**

General procedure C was used. Yield: 24.1 g, 61%, yellow oil.  $^1\text{H}$  NMR (400 MHz,  $\text{CDCl}_3$ )  $\delta$  = 3.85 (dd,  $J$  = 11.5, 2.5 Hz, 1H), 3.47 – 3.03 (m, 8H), 1.80 (dd,  $J$  = 13.2, 3.0 Hz, 1H), 1.74 – 1.49 (m, 4H), 1.44 (s, 9H), 1.33 (td,  $J$  = 13.3, 4.5 Hz, 1H), 1.23 (t,  $J$  = 5.9 Hz, 2H) ppm.  $^{13}\text{C}$  NMR (126 MHz,  $\text{CDCl}_3$ )  $\delta$  = 155.0, 79.5, 75.7, 39.8, 39.3, 35.0, 33.3, 31.0, 30.7, 28.6, 27.4, 9.8 ppm. LCMS ( $\text{M}+\text{H}$ ) $^+$ : 296. HRMS (ESI): calc'd for  $\text{C}_{15}\text{H}_{27}\text{INO}_3$  [ $\text{M}+\text{H}$ ] $^+$  396.1036; found 396.1032.

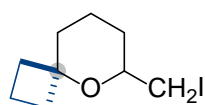

**6-(Iodomethyl)-5-oxaspiro[3.5]nonane (38a)**

General procedure C was used. Yield: 12.6 g, 47%, orange oil.  $^1\text{H}$  NMR (400 MHz,  $\text{CDCl}_3$ )  $\delta$  = 3.40 – 3.31 (m, 1H), 3.13 (d,  $J$  = 5.9 Hz, 2H), 2.21 – 2.08 (m, 1H), 2.01 – 1.85 (m, 3H), 1.83 – 1.67 (m, 4H), 1.62 – 1.50 (m, 2H), 1.45 – 1.32 (m, 1H), 1.22 – 1.08 (m, 1H) ppm.  $^{13}\text{C}$  NMR (126 MHz,  $\text{CDCl}_3$ )  $\delta$  = 77.8, 71.9, 35.0, 33.0, 31.12, 31.09, 20.1, 12.9, 10.4 ppm. GCMS (M): 266. HRMS (ESI): calc'd for  $\text{C}_9\text{H}_{16}\text{IO}$  [ $\text{M}+\text{H}$ ] $^+$  267.0246; found 267.0240.

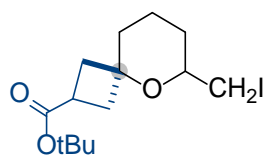

***Tert*-butyl 6-(iodomethyl)-5-oxaspiro[3.5]nonane-2-carboxylate (39a)**

General procedure C was used. Yield: 16.5 g, 45%, colorless oil. Mixture of stereoisomers (d.r. = 5:1).  $^1\text{H}$  NMR (400 MHz,  $\text{CDCl}_3$ )  $\delta$  = 3.39 – 3.02 (m, 3H), 2.64 – 2.51 (m, 1H), 2.39 – 2.29 (m, 1H), 2.30 – 1.97 (m, 3H), 1.81 – 1.50 (m, 4H), 1.41 (s, 9H), 1.28 – 0.88 (m, 2H) ppm.  $^{13}\text{C}$  NMR (101 MHz,  $\text{CDCl}_3$ )  $\delta$  = 175.4, 174.2, 80.4, 80.3, 73.5, 72.1, 72.0, 38.5, 37.7, 34.9, 34.6, 33.7, 33.0, 31.7, 31.0, 30.9, 28.2, 20.1, 19.8, 10.2, 9.9 ppm. HRMS (ESI): calc'd for  $\text{C}_{14}\text{H}_{24}\text{IO}_3$  [ $\text{M}+\text{H}$ ] $^+$  367.0770; found 367.0777.

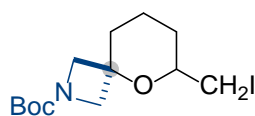

***Tert*-butyl 6-(iodomethyl)-5-oxa-2-azaspiro[3.5]nonane-2-carboxylate (40a)**

General procedure C was used. Yield: 18.7 g, 51%, yellow oil.  $^1\text{H}$  NMR (400 MHz,  $\text{CDCl}_3$ )  $\delta$  = 3.85 (dd,  $J$  = 16.9, 8.8 Hz, 2H), 3.71 (d,  $J$  = 8.9 Hz, 2H), 3.38 – 3.26 (m, 1H), 3.16 (d,  $J$  = 5.6 Hz, 1H), 1.80 (t,  $J$  = 9.3 Hz, 3H), 1.62 – 1.47 (m, 2H), 1.41 (s, 9H), 1.34 – 1.17 (m, 1H) ppm.  $^{13}\text{C}$  NMR (126 MHz,  $\text{CDCl}_3$ )  $\delta$  = 156.6, 79.7, 73.2, 61.0, 58.4, 32.6, 30.5, 28.5, 20.0, 9.2, 3.9 ppm. HRMS (ESI): calc'd for  $\text{C}_{13}\text{H}_{23}\text{INO}_3$   $[\text{M}+\text{H}]^+$  368.0723; found 368.0720.

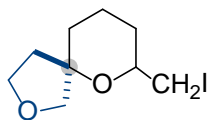

#### 7-(Iodomethyl)-2,6-dioxaspiro[4.5]decane (41a)

General procedure C was used. Yield: 14.3 g, 51%, brown oil. Mixture of stereoisomers (d.r. = 1:1).  $^1\text{H}$  NMR (400 MHz,  $\text{CDCl}_3$ )  $\delta$  = 4.08 – 3.72 (m, 3H), 3.58 (dd,  $J$  = 13.8, 9.4 Hz, 1H), 3.54 – 3.36 (m, 1H), 3.15 (dd,  $J$  = 5.7, 1.8 Hz, 2H), 2.28 – 1.96 (m, 1H), 1.90 – 1.81 (m, 2H), 1.80 – 1.31 (m, 4H), 1.28 – 1.07 (m, 1H) ppm.  $^{13}\text{C}$  NMR (151 MHz,  $\text{CDCl}_3$ )  $\delta$  = 83.9, 83.7, 79.8, 73.4, 72.7, 72.6, 68.3, 67.0, 41.4, 33.8, 32.9, 32.0, 31.2, 31.1, 21.6, 21.1, 10.5, 10.3 ppm. GCMS (M): 282. HRMS (ESI): calc'd for  $\text{C}_9\text{H}_{16}\text{IO}_2$   $[\text{M}+\text{H}]^+$  283.0195; found 283.0190.

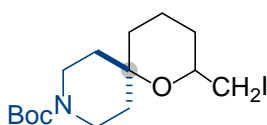

#### Tert-butyl 2-(iodomethyl)-1-oxa-9-azaspiro[5.5]undecane-9-carboxylate (42a)

General procedure C was used. Yield: 25.3 g, 64%, yellow oil.  $^1\text{H}$  NMR (400 MHz,  $\text{CDCl}_3$ )  $\delta$  = 3.83 – 3.74 (m, 2H), 3.61 – 3.50 (m, 1H), 3.36 – 3.25 (m, 1H), 3.21 – 3.14 (m, 2H), 3.11 – 3.03 (m, 1H), 2.15 (d,  $J$  = 14.2 Hz, 1H), 1.83 – 1.73 (m, 1H), 1.68 – 1.61 (m, 2H), 1.56 – 1.46 (m, 2H), 1.45 (s, 9H), 1.39 – 1.03 (m, 4H) ppm.  $^{13}\text{C}$  NMR (126 MHz,  $\text{CDCl}_3$ )  $\delta$  = 155.1, 79.3, 71.6, 69.9, 39.4, 39.2, 35.5, 31.8, 29.4, 28.6, 19.1, 10.6 ppm. HRMS (ESI): calc'd for  $\text{C}_{15}\text{H}_{27}\text{INO}_3$   $[\text{M}+\text{H}]^+$  396.1036; found 396.1040.

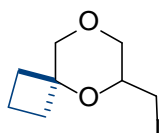

#### 6-(Iodomethyl)-5,8-dioxaspiro[3.5]nonane (43a)

General procedure C was used. Yield: 15.5 g, 58%, yellow oil.  $^1\text{H}$  NMR (400 MHz,  $\text{CDCl}_3$ )  $\delta$  = 3.92 (dd,  $J$  = 11.2, 2.3 Hz, 1H), 3.73 (d,  $J$  = 11.4 Hz, 1H), 3.71 – 3.60 (m, 1H), 3.32 (dd,  $J$  = 11.4, 2.0 Hz, 1H), 3.21 (t,  $J$  = 10.5 Hz, 1H), 3.04 (dd,  $J$  = 6.3, 1.9 Hz, 2H), 2.33 – 2.20 (m, 1H), 2.14 –

1.97 (m, 2H), 1.91 – 1.75 (m, 2H), 1.62 – 1.50 (m, 1H) ppm. GCMS (M): 268. HRMS (ESI): calc'd for  $C_{15}H_{27}INO_3$   $[M+H]^+$  269.0038; found 269.0033.

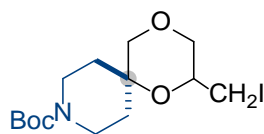

***Tert*-butyl 2-(iodomethyl)-1,4-dioxo-9-azaspiro[5.5]undecane-9-carboxylate (44a)**

General procedure C was used. Yield: 25 g, 63%, yellow solid, mp = 65-66 °C.  $^1H$  NMR (400 MHz,  $CDCl_3$ )  $\delta$  = 4.01 – 3.90 (m, 1H), 3.89 – 3.75 (m, 3H), 3.47 (d,  $J$  = 11.4 Hz, 1H), 3.30 – 2.96 (m, 6H), 2.32 (d,  $J$  = 14.2 Hz, 1H), 1.45 (s, 9H), 1.43 – 1.23 (m, 3H) ppm.  $^{13}C$  NMR (126 MHz,  $CDCl_3$ )  $\delta$  = 155.0, 79.6, 74.2, 70.9, 70.8, 68.1, 39.2, 38.6, 34.0, 28.9, 28.6, 3.6 ppm. GCMS (M): 397. HRMS (ESI): calc'd for  $C_{14}H_{25}INO_4$   $[M+H]^+$  398.0828; found 398.0821.

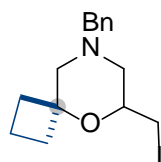

**8-Benzyl-6-(iodomethyl)-5-oxa-8-azaspiro[3.5]nonane (45a)**

General procedure C was used. Yield: 18.9 g, 53%, yellow solid.  $^1H$  NMR (400 MHz,  $CDCl_3$ )  $\delta$  = 7.35 – 7.24 (m, 5H), 3.60 – 3.32 (m, 4H), 2.67 (dd,  $J$  = 23.1, 11.3 Hz, 2H), 2.27 (q,  $J$  = 10.3 Hz, 1H), 2.14 (d,  $J$  = 11.5 Hz, 2H), 2.08 (d,  $J$  = 10.0 Hz, 1H), 1.95 – 1.84 (m, 1H), 1.75 – 1.61 (m, 1H), 1.48 – 1.31 (m, 1H), 1.28 – 1.26 (m, 1H) ppm.  $^{13}C$  NMR (126 MHz,  $CDCl_3$ )  $\delta$  138.3, 128.9, 128.5, 127.3, 75.0, 73.1, 62.7, 60.7, 60.1, 35.1, 34.6, 16.5, 13.7 ppm. HRMS (ESI): calc'd for  $C_{15}H_{21}INO$   $[M+H]^+$  358.0668; found 358.0660.

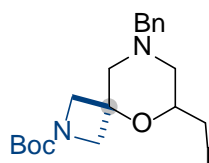

***Tert*-butyl 8-benzyl-6-(iodomethyl)-5-oxa-2,8-diazaspiro[3.5]nonane-2-carboxylate (46a)**

General procedure C was used. Yield: 26.6 g, 58%, yellow solid.  $^1H$  NMR (400 MHz,  $CDCl_3$ )  $\delta$  = 7.46 – 7.27 (m,  $J$  = 13.6, 6.5 Hz, 5H), 3.83 (q,  $J$  = 8.7 Hz, 3H), 3.65 (d,  $J$  = 9.4 Hz, 1H), 3.63 – 3.51 (m, 2H), 3.46 (d,  $J$  = 13.1 Hz, 1H), 3.13 (d,  $J$  = 5.7 Hz, 2H), 2.93 (d,  $J$  = 11.2 Hz, 1H), 2.81 (d,  $J$  = 11.3 Hz, 1H), 2.10 (d,  $J$  = 11.0 Hz, 1H), 1.92 (t,  $J$  = 10.5 Hz, 1H), 1.42 (s, 9H) ppm.  $^{13}C$  NMR (126 MHz,  $CDCl_3$ )  $\delta$  = 156.5, 137.5, 129.0, 128.6, 127.6, 79.8, 72.0, 62.6, 58.2, 57.2, 28.5, 5.0 ppm. HRMS (ESI): calc'd for  $C_{19}H_{28}IN_2O_3$   $[M+H]^+$  459.1145; found 459.1141.



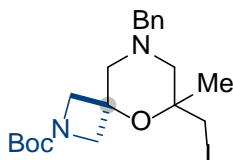

**Tert-butyl 8-benzyl-6-(iodomethyl)-6-methyl-5-oxa-2,8-diazaspiro[3.5]nonane-2-carboxylate (47a)**

General procedure C was used. Yield: 31.6 g, 67%, yellow solid.  $^1\text{H}$  NMR (400 MHz,  $\text{CDCl}_3$ )  $\delta$  7.46 – 7.27 (m, 5H), 3.83 (q,  $J$  = 8.7 Hz, 3H), 3.71 – 3.53 (m, 3H), 3.46 (d,  $J$  = 13.1 Hz, 1H), 3.13 (d,  $J$  = 5.7 Hz, 2H), 2.93 (d,  $J$  = 11.2 Hz, 1H), 2.81 (d,  $J$  = 11.3 Hz, 1H), 2.10 (d,  $J$  = 11.0 Hz, 1H), 1.92 (t,  $J$  = 10.5 Hz, 1H), 1.42 (s, 9H) ppm.  $^{13}\text{C}$  NMR (126 MHz,  $\text{CDCl}_3$ )  $\delta$  = 156.5, 137.5, 129.0, 128.6, 127.6, 79.8, 72.0, 62.6, 58.2, 57.2, 28.5, 5.0 ppm. HRMS (ESI): calc'd for  $\text{C}_{20}\text{H}_{30}\text{IN}_2\text{O}_3$   $[\text{M}+\text{H}]^+$  473.1301; found 473.1309.

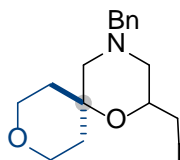

**4-Benzyl-2-(iodomethyl)-1,9-dioxaspiro[5.5]undecane (48a)**

General procedure C was used. Yield: 27.9 g, 72%, yellow solid.  $^1\text{H}$  NMR (400 MHz,  $\text{CDCl}_3$ )  $\delta$  = 7.37 – 7.28 (m, 5H), 3.88 (t,  $J$  = 10.0 Hz, 1H), 3.79 (t,  $J$  = 9.9 Hz, 1H), 3.59 – 3.44 (m, 4H), 3.40 (d,  $J$  = 9.8 Hz, 1H), 3.30 (d,  $J$  = 9.9 Hz, 1H), 2.51 (d,  $J$  = 11.2 Hz, 1H), 2.36 – 2.20 (m, 3H), 1.88 (d,  $J$  = 12.7 Hz, 1H), 1.78 (d,  $J$  = 12.2 Hz, 1H), 1.67 – 1.54 (m, 2H), 1.26 (t,  $J$  = 6.2 Hz, 1H) ppm.  $^{13}\text{C}$  NMR (101 MHz,  $\text{CDCl}_3$ )  $\delta$  = 138.2, 128.8, 128.5, 127.4, 72.2, 71.0, 64.3, 64.3, 62.7, 62.2, 61.1, 37.9, 37.7, 18.6 ppm. HRMS (ESI): calc'd for  $\text{C}_{16}\text{H}_{23}\text{INO}_2$   $[\text{M}+\text{H}]^+$  388.0773; found 388.0768.

**General procedure D for synthesis 5b, 32b and 33b (5b as an example. Scale: 0.01 mol for all derivatives).**

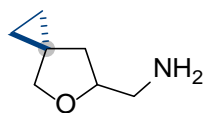

**(5-Oxaspiro[2.4]heptan-6-yl)methanamine (5b)**

A mixture of **5a** (2.4 g, 0.01 mol, 1.0 equiv) and  $\text{NaN}_3$  (2 g, 0.03 mol, 3.0 equiv) in DMF (50 mL) was heated and stirred at 50 °C for 15 h. The reaction mixture was cooled to room temperature and poured into cold water (100 mL). The aqueous mixture was extracted with MTBE ( $4 \times 50$  mL) and the organic extract was back-washed with water ( $3 \times 20$  mL), brine, dried over  $\text{Na}_2\text{SO}_4$ , and the solvent was partially evaporated under reduced pressure to afford the solution of the desired

compound. To a solution of triphenylphosphine (3.9 g, 0.015 mol, 1.5 equiv) and H<sub>2</sub>O (0.5 g, 0.03 mol, 3.0 equiv) in THF (20 mL) was added a solution of the appropriate azide (1.53g, 0.01 mol, 1.0 equiv) in THF dropwise. The mixture was stirred at 50 °C for 16 h. The mixture was concentrated under reduced pressure and H<sub>2</sub>O (0.5 g, 0.03 mol, 3.0 equiv) was added. The mixture was washed with MTBE (3 × 20 mL) and partitioned. The aqueous layer was concentrated, washed with pentane and filtered. The filtrate was combined with organic layers and concentrated under reduced pressure. The crude product was purified by distillation to afford the desired product. Yield: 0.7 g, 56%, yellow oil. <sup>1</sup>H NMR (400 MHz, CDCl<sub>3</sub>) δ = 4.20 – 4.04 (m, 1H), 3.67 (d, *J* = 8.0 Hz, 1H), 3.60 (d, *J* = 8.0 Hz, 1H), 2.89 – 2.71 (m, 2H), 2.55 (s, 2H), 1.83 (dd, *J* = 12.2, 6.8 Hz, 1H), 1.65 (dd, *J* = 12.1, 7.3 Hz, 1H), 0.68 – 0.43 (m, 4H) ppm. <sup>13</sup>C NMR (151 MHz, CDCl<sub>3</sub>) δ = 80.9, 75.0, 46.2, 38.2, 22.4, 11.0, 10.7 ppm. HRMS (ESI): calc'd for C<sub>7</sub>H<sub>14</sub>NO [M+H]<sup>+</sup> 128.1075; found 128.1078.

**General procedure E for synthesis 4b, 6b-31b and 34b-44b (6b as an example. Scale: 0.01 mol for all derivatives).**

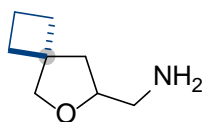

**(6-Oxaspiro[3.4]octan-7-yl)methanamine hydrochloride (6b)**

To a solution of **6a** (2.5 g, 0.01 mol, 1.0 equiv) in 50 mL of DMSO was added NaN<sub>3</sub> (1.0 g, 0.015 mol, 1.5 equiv). The mixture was heated at 85 °C for 24 h. The mixture was diluted with water (100 mL) and extracted with MTBE (6 times). The combined organic phases were washed with brine (3 times), dried over Na<sub>2</sub>SO<sub>4</sub>, filtered and partially concentrated under reduced pressure. The azide was stored as a solution in MeOH. To a solution of azide (1.67 g, 0.009 mol, 1.0 equiv) in 50 mL of MeOH was added and Pd/C (5%), (0.2 g). The mixture was stirred under H<sub>2</sub>-ballon at room temperature overnight. The reaction was monitored by TLC. After consumption of all starting material, Pd/C was filtered out, and the reaction mixture was concentrated under reduced pressure. The residue was dissolved in cold EtOAc and 5M HCl in dioxane was added dropwise to achieve a slightly acidic pH. The precipitate was filtered and dried. Yield: 1.6 g, 90%, brown solid, mp = 118–119 °C. <sup>1</sup>H NMR (400 MHz, DMSO-d<sub>6</sub>) δ = 8.22 (s, 3H), 4.11 – 3.98 (m, 1H), 3.75 – 3.62 (m, 2H), 2.92 – 2.80 (m, 1H), 2.78 – 2.66 (m, 1H), 2.08 (dd, *J* = 12.5, 6.8 Hz, 1H), 2.00 – 1.91 (m, 4H), 1.89 – 1.74 (m, 2H), 1.74 – 1.61 (m, 1H) ppm. <sup>13</sup>C NMR (126 MHz, DMSO-d<sub>6</sub>) δ = 77.8, 74.4, 45.4, 42.6, 41.7, 32.1, 30.2, 15.9 ppm. LCMS (M+H)<sup>+</sup>: 142. HRMS (ESI): calc'd for C<sub>8</sub>H<sub>16</sub>NO [M+H]<sup>+</sup> 142.1232; found 142.1237.

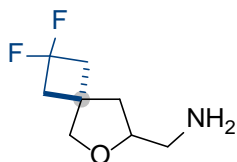

**(2,2-Difluoro-6-oxaspiro[3.4]octan-7-yl)methanamine hydrochloride (4b)**

General procedure E was used. Yield: 1.6 g, 77%, brown solid, mp = 207-209 °C.  $^1\text{H}$  NMR (400 MHz, DMSO- $d_6$ )  $\delta$  = 8.27 (s, 3H), 4.21 – 4.05 (m, 1H), 3.79 (d,  $J$  = 8.6 Hz, 1H), 3.72 (d,  $J$  = 8.6 Hz, 1H), 2.99 – 2.84 (m, 1H), 2.84 – 2.73 (m, 1H), 2.71 – 2.55 (m, 4H), 2.18 (dd,  $J$  = 12.7, 7.0 Hz, 1H), 1.88 (dd,  $J$  = 12.8, 7.7 Hz, 1H) ppm.  $^{13}\text{C}$  NMR (126 MHz, DMSO- $d_6$ )  $\delta$  = 119.9 (t,  $J$  = 277.6 Hz), 76.8, 74.7, 44.6 (t,  $J$  = 21.9 Hz), 43.0 (t,  $J$  = 22.4 Hz), 42.3, 40.8, 34.5 (t,  $J$  = 10.3 Hz) ppm. LCMS ( $\text{M}+\text{H}$ ) $^+$ : 178. HRMS (ESI): calc'd for  $\text{C}_8\text{H}_{14}\text{F}_2\text{NO}$  [ $\text{M}+\text{H}$ ] $^+$  178.1043; found 178.1041.

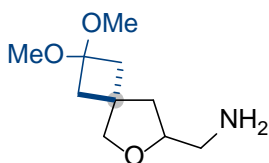

**(2,2-Dimethoxy-6-oxaspiro[3.4]octan-7-yl)methanamine (7b)**

General procedure E was used. Yield: 1.8 g, 89%, yellow oil.  $^1\text{H}$  NMR (400 MHz,  $\text{CDCl}_3$ )  $\delta$  = 3.98 – 3.85 (m, 1H), 3.72 (q,  $J$  = 8.5 Hz, 2H), 3.12 (s, 3H), 3.11 (s, 3H), 2.77 (dd,  $J$  = 13.1, 3.9 Hz, 1H), 2.67 (dd,  $J$  = 13.1, 7.0 Hz, 1H), 2.23 – 2.06 (m, 4H), 2.02 (dd,  $J$  = 12.5, 6.7 Hz, 1H), 1.70 – 1.65 (m, 1H), 1.64 (s, 2H) ppm.  $^{13}\text{C}$  NMR (126 MHz,  $\text{CDCl}_3$ )  $\delta$  = 143.2, 99.5, 80.5, 78.9, 48.6, 48.6, 46.6, 42.7, 42.6, 41.1, 36.7 ppm. LCMS ( $\text{M}+\text{H}$ ) $^+$ : 202. HRMS (ESI): calc'd for  $\text{C}_{10}\text{H}_{20}\text{NO}_3$  [ $\text{M}+\text{H}$ ] $^+$  202.1443; found 202.1440.

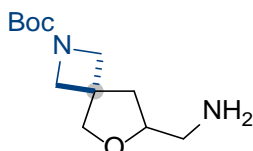

**Tert-butyl 7-(aminomethyl)-6-oxa-2-azaspiro[3.4]octane-2-carboxylate (8b)**

General procedure E was used. Yield: 2.3 g, 95%, yellow oil.  $^1\text{H}$  NMR (400 MHz,  $\text{CDCl}_3$ )  $\delta$  = 3.98 – 3.87 (m, 2H), 3.87 – 3.81 (m, 5H), 2.79 (dd,  $J$  = 13.1, 3.6 Hz, 1H), 2.66 (dd,  $J$  = 13.1, 6.8 Hz, 1H), 2.15 (dd,  $J$  = 12.7, 6.8 Hz, 1H), 1.83 (dd,  $J$  = 12.7, 7.9 Hz, 1H), 1.46 (s, 2H), 1.41 (s, 9H) ppm.  $^{13}\text{C}$  NMR (151 MHz,  $\text{CDCl}_3$ )  $\delta$  = 156.3, 80.6, 79.7, 77.1, 59.2 (br s), 46.2, 40.7, 40.6, 28.4 ppm. HRMS (ESI): calc'd for  $\text{C}_{12}\text{H}_{23}\text{N}_2\text{O}_3$  [ $\text{M}+\text{H}$ ] $^+$  243.1709; found 243.1707.

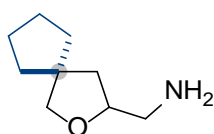

**(2-Oxaspiro[4.4]nonan-3-yl)methanamine (9b)**

General procedure E was used. Yield: 1.4 g, 87%, colorless oil.  $^1\text{H}$  NMR (400 MHz,  $\text{CDCl}_3$ )  $\delta$  = 4.01 – 3.89 (m, 1H), 3.55 (dd,  $J$  = 18.3, 8.1 Hz, 2H), 2.77 (dd,  $J$  = 13.1, 3.9 Hz, 1H), 2.70 (dd,  $J$  = 13.0, 7.0 Hz, 1H), 1.82 (dd,  $J$  = 12.1, 6.6 Hz, 1H), 1.64 (s, 2H), 1.64 – 1.46 (m, 9H) ppm.  $^{13}\text{C}$  NMR (126 MHz,  $\text{CDCl}_3$ )  $\delta$  = 143.2, 80.9, 78.6, 51.0, 46.8, 42.4, 37.7, 36.6, 24.88, 24.86 ppm. LCMS ( $\text{M}+\text{H}$ ) $^+$ : 156. HRMS (ESI): calc'd for  $\text{C}_9\text{H}_{18}\text{NO}$  [ $\text{M}+\text{H}$ ] $^+$  156.1388; found 156.1387.

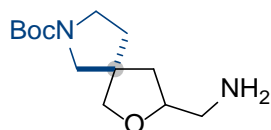

**Tert-butyl-3-(aminomethyl)-2-oxa-7-azaspiro[4.4]nonane-7-carboxylate (10b)**

General procedure E was used. Yield: 2.1 g, 81%, colorless oil. Mixture of stereoisomers (d.r. = 5:2).  $^1\text{H}$  NMR (400 MHz,  $\text{CDCl}_3$ )  $\delta$  = 3.96 (br s, 1H), 3.72 – 3.52 (m, 2H), 3.47 – 3.15 (m, 4H), 2.79 (dd,  $J$  = 13.1, 3.7 Hz, 1H), 2.70 (dd,  $J$  = 13.1, 6.9 Hz, 1H), 1.98 – 1.73 (m, 3H), 1.64 – 1.51 (m, 1H), 1.46 (s, 2H), 1.41 (s, 9H) ppm.  $^{13}\text{C}$  NMR (126 MHz,  $\text{CDCl}_3$ )  $\delta$  = 154.63, 154.58, 80.82, 80.75, 79.4, 76.5, 76.3, 76.0, 55.8, 55.4, 55.1, 50.3, 50.1, 49.4, 46.5, 45.4, 45.1, 39.6, 39.4, 35.6, 34.9, 34.5, 28.6 ppm. GCMS (M): 256. HRMS (ESI): calc'd for  $\text{C}_{13}\text{H}_{25}\text{N}_2\text{O}_3$  [ $\text{M}+\text{H}$ ] $^+$  257.1865; found 257.1868.

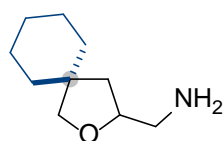

**(2-Oxaspiro[4.5]decan-3-yl)methanamine (11b)**

General procedure E was used. Yield: 1.4 g, 80%, colorless oil.  $^1\text{H}$  NMR (400 MHz,  $\text{DMSO}-d_6$ )  $\delta$  = 3.85 – 3.71 (m, 1H), 3.45 (d,  $J$  = 8.3 Hz, 1H), 3.40 (d,  $J$  = 8.3 Hz, 1H), 2.55 (d,  $J$  = 5.5 Hz, 2H), 1.74 (dd,  $J$  = 12.3, 6.8 Hz, 1H), 1.66 – 1.46 (m, 1H), 1.44 – 1.22 (m, 12H) ppm.  $^{13}\text{C}$  NMR (151 MHz,  $\text{DMSO}-d_6$ )  $\delta$  = 80.0, 77.3, 46.5, 43.2, 36.1, 35.1, 25.6, 23.5, 23.1 ppm. LCMS ( $\text{M}+\text{H}$ ) $^+$ : 170. HRMS (ESI): calc'd for  $\text{C}_{10}\text{H}_{20}\text{NO}$  [ $\text{M}+\text{H}$ ] $^+$  170.1545; found 170.1540.

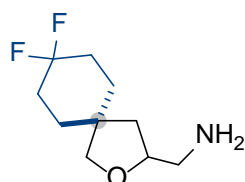

**(8,8-Difluoro-2-oxaspiro[4.5]decan-3-yl)methanamine hydrochloride (12b)**

General procedure E was used. Yield: 22.9 g, 95%, beige solid, mp = 122-123 °C.  $^1\text{H}$  NMR (400 MHz,  $\text{DMSO}-d_6$ )  $\delta$  = 8.24 (s, 3H), 4.24 – 4.07 (m, 1H), 3.58 (q,  $J$  = 8.7 Hz, 2H), 3.37 (s, 2H), 2.89 (s, 1H), 2.87 – 2.73 (m, 1H), 2.02 – 1.76 (m, 4H), 1.59 (dd,  $J$  = 13.2, 7.2 Hz, 3H), 1.49 (dd,  $J$  =

12.7, 8.4 Hz, 1H) ppm.  $^{13}\text{C}$  NMR (151 MHz, DMSO- $d_6$ )  $\delta$  = 124.0 (t,  $J$  = 240.2 Hz), 76.0, 74.5, 42.5, 42.3, 31.4 (t,  $J$  = 4.8 Hz), 31.1 (t,  $J$  = 23.7 Hz), 30.7 (t,  $J$  = 23.7 Hz), 30.6 (t,  $J$  = 4.9 Hz) ppm. LCMS ( $\text{M}+\text{H}$ ) $^+$ : 206. HRMS (ESI): calc'd for  $\text{C}_{10}\text{H}_{18}\text{F}_2\text{NO}$  [ $\text{M}+\text{H}$ ] $^+$  206.1356; found 206.1353.

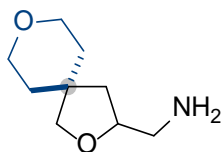

**(2,8-Dioxaspiro[4.5]decan-3-yl)methanamine hydrochloride (13b)**

General procedure E was used. Yield: 1.6 g, 78%, beige solid, mp = 158-160 °C.  $^1\text{H}$  NMR (400 MHz, DMSO- $d_6$ )  $\delta$  = 8.27 (s, 3H), 4.24 – 4.08 (m, 1H), 3.72 – 3.42 (m, 6H), 2.89 (br s, 1H), 2.80 (br s, 1H), 1.98 (dd,  $J$  = 12.6, 7.1 Hz, 1H), 1.64 – 1.36 (m, 5H) ppm.  $^{13}\text{C}$  NMR (126 MHz, DMSO- $d_6$ )  $\delta$  = 76.8, 74.3, 64.8, 64.4, 42.6, 41.2, 35.3, 34.9 ppm. LCMS ( $\text{M}+\text{H}$ ) $^+$ : 172. HRMS (ESI): calc'd for  $\text{C}_9\text{H}_{18}\text{NO}_2$  [ $\text{M}+\text{H}$ ] $^+$  172.1338; found 172.1334.

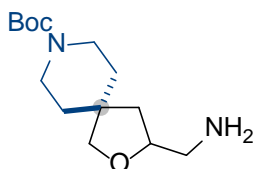

**Tert-butyl 3-(aminomethyl)-2-oxa-8-azaspiro[4.5]decane-8-carboxylate (14b)**

General procedure E was used. Yield: 2.4 g, 88%, colorless oil.  $^1\text{H}$  NMR (400 MHz, DMSO- $d_6$ )  $\delta$  = 3.89 – 3.75 (m, 1H), 3.47 (dd,  $J$  = 22.4, 8.5 Hz, 2H), 3.41 – 3.31 (m, 2H), 3.28 – 3.15 (m, 2H), 2.56 (d,  $J$  = 5.4 Hz, 2H), 1.81 (dd,  $J$  = 12.4, 6.9 Hz, 1H), 1.51 – 1.39 (m, 4H), 1.39 (s, 9H), 1.36 – 1.23 (m, 2H) ppm.  $^{13}\text{C}$  NMR (126 MHz, DMSO- $d_6$ )  $\delta$  = 153.8, 80.0, 78.4, 76.5, 46.3, 41.8, 35.0, 34.1, 28.1 ppm. HRMS (ESI): calc'd for  $\text{C}_{14}\text{H}_{27}\text{N}_2\text{O}_3$  [ $\text{M}+\text{H}$ ] $^+$  271.2022; found 271.2016.

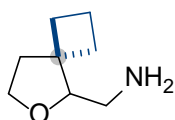

**(6-Oxaspiro[3.4]octan-5-yl)methanamine hydrochloride (15b)**

General procedure E was used. Yield: 1.6 g, 90%, white solid.  $^1\text{H}$  NMR (500 MHz,  $\text{CD}_3\text{OD}$ )  $\delta$  = 3.96 – 3.88 (m, 1H), 3.85 (dd,  $J$  = 11.0, 2.5 Hz, 1H), 3.77 (q,  $J$  = 8.3 Hz, 1H), 3.14 (d,  $J$  = 12.5 Hz, 1H), 2.70 (t,  $J$  = 11.8 Hz, 1H), 2.23 – 1.92 (m, 6H), 1.91 – 1.77 (m, 2H) ppm.  $^{13}\text{C}$  NMR (126 MHz, DMSO- $d_6$ )  $\delta$  = 73.2, 57.8, 33.1, 30.0, 24.5, 18.7, 7.9 ppm. LCMS ( $\text{M}+\text{H}$ ) $^+$ : 142. HRMS (ESI): calc'd for  $\text{C}_8\text{H}_{16}\text{NO}$  [ $\text{M}+\text{H}$ ] $^+$  142.1232; found 142.1235.

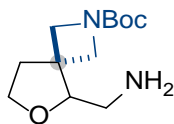

**Tert-butyl 5-(aminomethyl)-6-oxa-2-azaspiro[3.4]octane-2-carboxylate (16b)**

General procedure E was used. Yield: 1.9 g, 79%, colorless oil.  $^1\text{H}$  NMR (500 MHz,  $\text{CDCl}_3$ )  $\delta$  = 4.00 (d,  $J$  = 8.9 Hz, 1H), 3.91 – 3.84 (m, 2H), 3.83 (d,  $J$  = 3.5 Hz, 1H), 3.77 – 3.72 (m, 2H), 3.71 (d,  $J$  = 9.0 Hz, 1H), 2.94 (d,  $J$  = 11.5 Hz, 1H), 2.72 (dd,  $J$  = 12.9, 8.1 Hz, 1H), 2.26 – 2.09 (m, 2H), 1.46 (s, 2H), 1.43 (s, 9H) ppm.  $^{13}\text{C}$  NMR (126 MHz,  $\text{CDCl}_3$ )  $\delta$  = 156.5, 85.6, 79.8, 65.8, 59.9 (br s), 55.3 (br s), 43.5, 42.0, 39.4, 28.5 ppm. LCMS ( $\text{M}+\text{H}$ ) $^+$ : 243. HRMS (ESI): calc'd for  $\text{C}_{12}\text{H}_{23}\text{N}_2\text{O}_3$  [ $\text{M}+\text{H}$ ] $^+$  243.1709; found 243.1705.

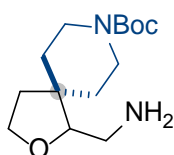

**Tert-butyl 1-(aminomethyl)-2-oxa-8-azaspiro[4.5]decane-8-carboxylate (17b)**

General procedure E was used. Yield: 2 g, 75%, white solid.  $^1\text{H}$  NMR (500 MHz,  $\text{CD}_3\text{OD}$ )  $\delta$  = 4.08 – 3.99 (m, 1H), 3.94 – 3.80 (m, 3H), 3.72 (dd,  $J$  = 11.0, 1.7 Hz, 1H), 3.17 – 2.96 (m, 3H), 2.90 (t,  $J$  = 11.9 Hz, 1H), 2.07 – 1.91 (m, 2H), 1.61 – 1.47 (m, 3H), 1.45 (s, 9H) ppm.  $^{13}\text{C}$  NMR (126 MHz,  $\text{DMSO}-d_6$ )  $\delta$  = 146.9, 74.0, 71.6, 57.7, 35.4, 32.7 (br s), 31.8, 25.8, 25.6, 21.6, 19.2 ppm. LCMS ( $\text{M}+\text{H}$ ) $^+$ : 271. HRMS (ESI): calc'd for  $\text{C}_{14}\text{H}_{27}\text{N}_2\text{O}_3$  [ $\text{M}+\text{H}$ ] $^+$  271.2022; found 271.2018.

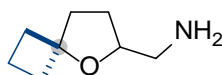

**(5-Oxaspiro[3.4]octan-6-yl)methanamine hydrochloride (18b)**

General procedure E was used. Yield: 1.6 g, 90%, brown solid, mp = 88-89 °C.  $^1\text{H}$  NMR (400 MHz,  $\text{DMSO}-d_6$ )  $\delta$  = 8.21 (s, 3H), 4.16 – 3.97 (m, 1H), 2.82 (br s, 1H), 2.72 – 2.56 (m, 1H), 2.22 – 2.05 (m, 2H), 2.04 – 1.80 (m, 5H), 1.72 – 1.54 (m, 2H), 1.53 – 1.34 (m, 1H) ppm.  $^{13}\text{C}$  NMR (126 MHz,  $\text{DMSO}-d_6$ )  $\delta$  = 83.3, 74.4, 43.4, 35.7, 35.5, 35.2, 27.8, 12.2 ppm. LCMS ( $\text{M}+\text{H}$ ) $^+$ : 142. HRMS (ESI): calc'd for  $\text{C}_8\text{H}_{16}\text{NO}$  [ $\text{M}+\text{H}$ ] $^+$  142.1232; found 142.1234.

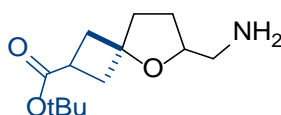

**Tert-butyl 6-(aminomethyl)-5-oxaspiro[3.4]octane-2-carboxylate (19b)**

General procedure E was used. Yield: 1.8 g, 76%, brown oil.  $^1\text{H}$  NMR (400 MHz,  $\text{DMSO}-d_6$ )  $\delta$  = 3.88 – 3.76 (m, 1H), 2.95 – 2.82 (m, 1H), 2.67 – 2.51 (m, 3H), 2.40 – 2.27 (m, 1H), 2.25 – 2.06 (m,

4H), 1.93 – 1.76 (m, 3H), 1.62 – 1.49 (m, 1H), 1.39 (s, 9H) ppm.  $^{13}\text{C}$  NMR (126 MHz, DMSO- $d_6$ )  $\delta$  = 173.5, 79.8, 79.5, 78.3, 46.2, 38.8, 36.0, 29.6, 27.7 ppm. HRMS (ESI): calc'd for  $\text{C}_{13}\text{H}_{24}\text{NO}_3$   $[\text{M}+\text{H}]^+$  242.1756; found 242.1750.

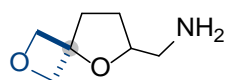

**(2,5-Dioxaspiro[3.4]octan-6-yl)methanamine (20b)**

General procedure E was used. Yield: 1.3 g, 90%, colorless oil.  $^1\text{H}$  NMR (400 MHz,  $\text{CDCl}_3$ )  $\delta$  = 4.75 (d,  $J$  = 6.5 Hz, 1H), 4.68 (d,  $J$  = 6.4 Hz, 1H), 4.48 (t,  $J$  = 7.4 Hz, 1H), 3.97 – 3.85 (m, 1H), 2.73 (dd,  $J$  = 13.1, 4.0 Hz, 1H), 2.58 (dd,  $J$  = 13.1, 6.9 Hz, 1H), 2.26 – 2.17 (m, 1H), 2.16 – 1.98 (m, 1H), 1.94 – 1.83 (m, 1H), 1.63 – 1.48 (m, 1H), 1.42 (s, 2H) ppm.  $^{13}\text{C}$  NMR (126 MHz,  $\text{CDCl}_3$ )  $\delta$  = 84.4, 83.8, 82.3, 81.4, 46.7, 35.3, 28.0 ppm. GCMS (M): 143. HRMS (ESI): calc'd for  $\text{C}_7\text{H}_{14}\text{NO}_2$   $[\text{M}+\text{H}]^+$  144.1025; found 144.1027.

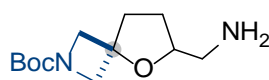

**Tert-butyl 6-(aminomethyl)-5-oxa-2-azaspiro[3.4]octane-2-carboxylate (21b)**

General procedure E was used. Yield: 1.9 g, 79%, yellow oil.  $^1\text{H}$  NMR (400 MHz,  $\text{CDCl}_3$ )  $\delta$  = 3.97 (dd,  $J$  = 16.1, 8.9 Hz, 3H), 3.82 (d,  $J$  = 8.9 Hz, 2H), 2.78 (dd,  $J$  = 13.1, 3.9 Hz, 1H), 2.64 (dd,  $J$  = 13.1, 6.9 Hz, 1H), 2.14 – 2.02 (m, 2H), 2.01 – 1.90 (m, 1H), 1.67 (br s, 2H), 1.61 – 1.53 (m, 1H), 1.41 (s, 9H) ppm.  $^{13}\text{C}$  NMR (126 MHz,  $\text{CDCl}_3$ )  $\delta$  = 156.5, 81.4, 79.6, 78.2, 62.1 (br s), 46.7, 36.1, 28.5, 28.1 ppm. HRMS (ESI): calc'd for  $\text{C}_{12}\text{H}_{23}\text{N}_2\text{O}_3$   $[\text{M}+\text{H}]^+$  243.1709; found 243.1700.

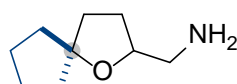

**(1-Oxaspiro[4.4]nonan-2-yl)methanamine hydrochloride (22b)**

General procedure E was used. Yield: 1.8 g, 95%, yellow solid, mp = 143-144 °C.  $^1\text{H}$  NMR (400 MHz, DMSO- $d_6$ )  $\delta$  = 8.22 (s, 3H), 4.13 – 4.02 (m, 1H), 2.92 – 2.78 (m, 1H), 2.75 – 2.62 (m, 1H), 2.52 – 2.43 (m, 1H), 2.07 – 1.91 (m, 1H), 1.89 – 1.41 (m, 10H) ppm.  $^{13}\text{C}$  NMR (126 MHz, DMSO- $d_6$ )  $\delta$  = 91.7, 73.8, 43.3, 38.2, 37.6, 35.4, 28.9, 23.6, 23.6 ppm. LCMS (M+H) $^+$ : 156. HRMS (ESI): calc'd for  $\text{C}_9\text{H}_{18}\text{NO}$   $[\text{M}+\text{H}]^+$  156.1388; found 156.1390.

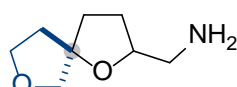

**1,7-Dioxaspiro[4.4]nonan-2-yl)methanamine (23b)**

General procedure E was used. Yield: 1.4 g, 74%, colorless oil. Mixture of stereoisomers (d.r. = 1:1).  $^1\text{H}$  NMR (400 MHz,  $\text{CDCl}_3$ )  $\delta$  = 3.99 – 3.82 (m, 3H), 3.74 (dd,  $J$  = 21.7, 9.1 Hz, 1H), 3.56 (dd,  $J$  = 39.6, 9.1 Hz, 1H), 2.84 – 2.72 (m, 1H), 2.73 – 2.63 (m, 1H), 2.12 – 2.00 (m, 1H), 1.98 – 1.88 (m, 3H), 1.87 – 1.73 (m, 1H), 1.72 – 1.56 (m, 1H), 1.52 (s, 2H) ppm.  $^{13}\text{C}$  NMR (126 MHz,  $\text{CDCl}_3$ )  $\delta$  = 89.6, 89.5, 80.6, 80.4, 77.6, 77.1, 68.0, 67.93, 46.82, 46.80, 39.4, 38.7, 34.1, 33.6, 29.0 ppm. GCMS (M): 157. HRMS (ESI): calc'd for  $\text{C}_8\text{H}_{16}\text{NO}_2$   $[\text{M}+\text{H}]^+$  158.1181; found 158.1177.

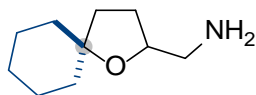

**(1-Oxaspiro[4.5]decan-2-yl)methanamine hydrochloride (24b)**

General procedure E was used. Yield: 1.9 g, 87%, brown solid, mp = 175-177 °C.  $^1\text{H}$  NMR (400 MHz,  $\text{DMSO-d}_6$ )  $\delta$  = 8.17 (s, 3H), 4.15 – 3.99 (m, 1H), 2.91 – 2.78 (m, 1H), 2.78 – 2.61 (m, 1H), 2.50 – 2.42 (m, 1H), 2.08 – 1.93 (m, 1H), 1.77 – 1.51 (m, 5H), 1.49 – 1.42 (m, 3H), 1.40 – 1.16 (m, 4H) ppm.  $^{13}\text{C}$  NMR (126 MHz,  $\text{DMSO-d}_6$ )  $\delta$  = 83.3, 73.7, 43.5, 37.9, 36.7, 35.1, 28.4, 25.2, 23.4, 23.2 ppm. LCMS  $(\text{M}+\text{H})^+$ : 170. HRMS (ESI): calc'd for  $\text{C}_{10}\text{H}_{20}\text{NO}$   $[\text{M}+\text{H}]^+$  170.1545; found 170.1547.

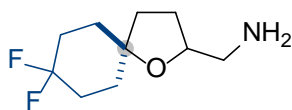

**(8,8-Difluoro-1-oxaspiro[4.5]decan-2-yl)methanamine hydrochloride (25b)**

General procedure E was used. Yield: 1.7 g, 72%, brown solid, mp = 140-142 °C.  $^1\text{H}$  NMR (400 MHz,  $\text{DMSO-d}_6$ )  $\delta$  = 8.21 (br s, 3H), 4.17 – 4.04 (m, 1H), 2.96 – 2.86 (m, 1H), 2.78 – 2.67 (m, 1H), 2.27 – 1.94 (m, 3H), 1.94 – 1.40 (m, 9H) ppm.  $^{13}\text{C}$  NMR (126 MHz,  $\text{DMSO}$ )  $\delta$  = 124.1 (t,  $J$  = 240.0 Hz), 80.8, 74.3, 43.3, 35.2, 33.6 (d,  $J$  = 8.0 Hz), 32.4 (d,  $J$  = 8.1 Hz), 30.3 (t,  $J$  = 23.9 Hz), 28.2 ppm. HRMS (ESI): calc'd for  $\text{C}_{10}\text{H}_{18}\text{F}_2\text{NO}$   $[\text{M}+\text{H}]^+$  206.1356; found 206.1349.

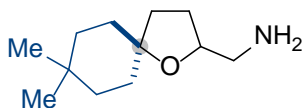

**(8,8-Dimethyl-1-oxaspiro[4.5]decan-2-yl)methanamine hydrochloride (26b)**

General procedure E was used. Yield: 1.7 g, 69%, yellow solid, mp = 194-195 °C.  $^1\text{H}$  NMR (400 MHz,  $\text{DMSO-d}_6$ )  $\delta$  = 8.17 (s, 3H), 4.14 – 4.02 (m, 1H), 2.89 – 2.78 (m, 1H), 2.77 – 2.66 (m, 1H), 2.07 – 1.90 (m, 1H), 1.74 – 1.62 (m, 3H), 1.59 – 1.35 (m, 6H), 1.14 (t,  $J$  = 9.5 Hz, 2H), 0.89 (s, 3H), 0.87 (s, 3H) ppm.  $^{13}\text{C}$  NMR (126 MHz,  $\text{DMSO-d}_6$ )  $\delta$  = 83.1, 73.7, 43.4, 36.1, 35.9, 35.1, 33.7, 32.6, 29.2, 28.3 ppm. LCMS  $(\text{M}+\text{H})^+$ : 198. HRMS (ESI): calc'd for  $\text{C}_{12}\text{H}_{24}\text{NO}$   $[\text{M}+\text{H}]^+$  198.1858; found 198.1853.



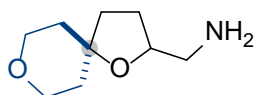

**(1,8-Dioxaspiro[4.5]decan-2-yl)methanamine hydrochloride (27b)**

General procedure E was used. Yield: 1.8 g, 88%, yellow solid, mp = 134-135 °C.  $^1\text{H}$  NMR (400 MHz, DMSO- $d_6$ )  $\delta$  = 8.23 (s, 3H), 4.18 – 4.05 (m, 1H), 3.78 – 3.59 (m, 2H), 3.54 – 3.36 (m, 2H), 2.95 – 2.80 (m, 1H), 2.81 – 2.66 (m, 1H), 2.13 – 1.95 (m, 1H), 1.82 – 1.68 (m, 3H), 1.57 (t,  $J$  = 5.3 Hz, 2H), 1.53 (t,  $J$  = 5.6 Hz, 2H) ppm.  $^{13}\text{C}$  NMR (126 MHz, DMSO- $d_6$ )  $\delta$  = 80.4, 73.9, 64.6, 64.4, 43.3, 38.0, 37.0, 35.3, 28.1 ppm. LCMS ( $\text{M}+\text{H}$ ) $^+$ : 172. HRMS (ESI): calc'd for  $\text{C}_9\text{H}_{18}\text{NO}_2$  [ $\text{M}+\text{H}$ ] $^+$  172.1338; found 172.1335.

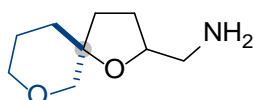

**(1,7-Dioxaspiro[4.5]decan-2-yl)methanamine (28b)**

General procedure E was used. Yield: 1.3 g, 73%, colorless oil. Mixture of stereoisomers (d.r. = 1:1).  $^1\text{H}$  NMR (400 MHz,  $\text{CDCl}_3$ )  $\delta$  = 3.99 – 3.87 (m, 1H), 3.64 – 3.45 (m, 2H), 3.40 – 3.36 (m, 1H), 3.35 – 3.19 (m, 1H), 2.80 – 2.70 (m, 1H), 2.69 – 2.55 (m, 1H), 1.96 – 1.89 (m, 1H), 1.85 – 1.45 (m, 7H), 1.40 (s, 2H) ppm.  $^{13}\text{C}$  NMR (151 MHz,  $\text{CDCl}_3$ )  $\delta$  = 80.4, 80.3, 79.8, 79.7, 75.1, 74.3, 67.9, 67.8, 46.9, 46.8, 35.8, 35.2, 34.2, 33.8, 28.3, 28.0, 24.3, 24.2 ppm. GCMS (M): 171. HRMS (ESI): calc'd for  $\text{C}_9\text{H}_{18}\text{NO}_2$  [ $\text{M}+\text{H}$ ] $^+$  172.1338; found 172.1335.

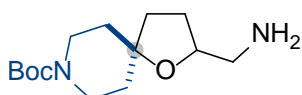

**Tert-butyl 2-(aminomethyl)-1-oxa-8-azaspiro[4.5]decane-8-carboxylate (29b)**

General procedure E was used. Yield: 2.4 g, 91%, brown oil.  $^1\text{H}$  NMR (400 MHz,  $\text{CDCl}_3$ )  $\delta$  = 4.06 – 3.95 (m, 1H), 3.60 (br s, 1H), 3.51 (br s, 3H), 3.37 – 3.26 (m, 2H), 2.84 (dd,  $J$  = 12.8, 3.6 Hz, 1H), 2.69 (dd,  $J$  = 12.8, 6.9 Hz, 1H), 2.01 – 1.91 (m, 1H), 1.78 – 1.64 (m, 3H), 1.59 – 1.45 (m, 4H), 1.40 (s, 9H) ppm.  $^{13}\text{C}$  NMR (126 MHz,  $\text{CDCl}_3$ )  $\delta$  = 155.0, 80.8, 79.4, 78.3, 46.3, 41.0 (br s), 37.7, 36.6, 36.3, 28.6, 28.4 ppm. LCMS ( $\text{M}+\text{H}$ ) $^+$ : 271. HRMS (ESI): calc'd for  $\text{C}_{14}\text{H}_{27}\text{N}_2\text{O}_3$  [ $\text{M}+\text{H}$ ] $^+$  271.2022; found 271.2016.

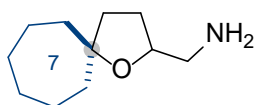

**(1-Oxaspiro[4.6]undecan-2-yl)methanamine hydrochloride (30b)**

General procedure E was used. Yield: 1.7 g, 78%, beige solid, mp = 183-184 °C.  $^1\text{H}$  NMR (400 MHz, DMSO- $d_6$ )  $\delta$  = 8.17 (s, 3H), 4.12 – 3.97 (m, 1H), 2.99 – 2.75 (m, 1H), 2.78 – 2.58 (m, 1H), 2.08 – 1.89 (m, 1H), 1.76 – 1.37 (m, 12H), 1.37 – 1.18 (m, 2H) ppm.  $^{13}\text{C}$  NMR (126 MHz, DMSO- $d_6$ )  $\delta$  = 86.8, 73.8, 43.3, 40.9, 37.1, 28.8, 28.3, 22.7, 22.3 ppm. LCMS ( $\text{M}+\text{H}$ ) $^+$ : 184. HRMS (ESI): calc'd for:  $\text{C}_{11}\text{H}_{22}\text{NO}$  [ $\text{M}+\text{H}$ ] $^+$  184.1701; found 184.1706.

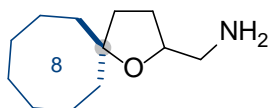

**(1-Oxaspiro[4.7]dodecan-2-yl)methanamine hydrochloride (31b)**

General procedure E was used. Yield: 2.1 g, 90%, yellow solid, mp = 142-143 °C.  $^1\text{H}$  NMR (400 MHz, DMSO- $d_6$ )  $\delta$  = 8.18 (s, 3H), 4.14 – 4.00 (m, 1H), 3.54 (br s, 1H), 2.89 – 2.78 (m, 1H), 2.76 – 2.62 (m, 1H), 2.07 – 1.91 (m, 1H), 1.79 – 1.32 (m, 16H) ppm.  $^{13}\text{C}$  NMR (151 MHz, DMSO- $d_6$ )  $\delta$  = 86.6, 73.7, 43.3, 36.2, 36.1, 34.9, 28.6, 27.9, 27.7, 24.2, 22.4, 22.2 ppm. LCMS ( $\text{M}+\text{H}$ ) $^+$ : 198. HRMS (ESI): calc'd for:  $\text{C}_{12}\text{H}_{24}\text{NO}$  [ $\text{M}+\text{H}$ ] $^+$  198.1858; found 198.1860.

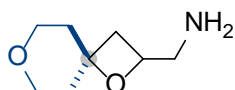

**(1,7-Dioxaspiro[3.5]nonan-2-yl)methanamine (32b)**

General procedure D was applied. The final product was purified by distillation. Yield: 1.2 g, 45%, yellow oil.  $^1\text{H}$  NMR (400 MHz,  $\text{CDCl}_3$ )  $\delta$  = 4.63 – 4.50 (m, 1H), 3.79 – 3.68 (m, 2H), 3.57 – 3.47 (m, 2H), 2.91 – 2.75 (m, 2H), 2.31 (dd,  $J$  = 11.0, 7.7 Hz, 1H), 2.13 (dd,  $J$  = 11.0, 7.1 Hz, 1H), 1.93 – 1.83 (m, 2H), 1.80 – 1.70 (m, 2H), 1.50 (s, 2H) ppm.  $^{13}\text{C}$  NMR (126 MHz,  $\text{CDCl}_3$ )  $\delta$  = 79.1, 76.1, 74.3, 64.4, 64.0, 48.3, 40.1, 38.8, 34.6 ppm. LCMS ( $\text{M}+\text{H}$ ) $^+$ : 158. HRMS (ESI): calc'd for  $\text{C}_8\text{H}_{16}\text{NO}_2$  [ $\text{M}+\text{H}$ ] $^+$  158.1181; found 158.1184.

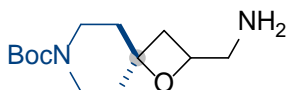

***Tert*-butyl 2-(aminomethyl)-1-oxa-7-azaspiro[3.5]nonane-7-carboxylate (33b)**

General procedure D was applied. The final product was purified by column chromatography (hexane/EtOAc, 8:2 + 1.5%  $\text{Et}_3\text{N}$ ). Yield: 0.8 g, 32%, yellow oil.  $^1\text{H}$  NMR (400 MHz,  $\text{CDCl}_3$ )  $\delta$  = 4.64 – 4.51 (m, 1H), 3.47 – 3.33 (m, 4H), 2.92 – 2.77 (m, 2H), 2.33 – 2.23 (m, 1H), 2.16 – 2.08 (m, 1H), 1.92 – 1.82 (m, 1H), 1.82 – 1.72 (m, 2H), 1.70 – 1.62 (m, 1H), 1.59 – 1.49 (m, 2H), 1.42 (s, 9H) ppm.  $^{13}\text{C}$  NMR (151 MHz,  $\text{CDCl}_3$ )  $\delta$  = 154.9, 80.0, 79.6, 76.1, 48.3, 40.1, 38.9, 37.6, 34.2, 28.5 ppm. LCMS ( $\text{M}+\text{H}$ ) $^+$ : 257. HRMS (ESI): calc'd for:  $\text{C}_{13}\text{H}_{25}\text{N}_2\text{O}_3$  [ $\text{M}+\text{H}$ ] $^+$  257.1865; found 257.1860.

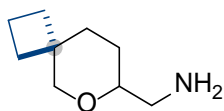

**(6-Oxaspiro[3.5]nonan-7-yl)methanamine hydrochloride (34b)**

General procedure E was used. Yield: 1.7 g, 89%, white solid, mp = 180-182 °C. <sup>1</sup>H NMR (400 MHz, DMSO-d<sub>6</sub>) δ = 8.21 (s, 3H), 3.79 (d, *J* = 11.0 Hz, 1H), 3.46 (t, *J* = 9.5 Hz, 1H), 3.38 (s, 1H), 3.15 (d, *J* = 11.1 Hz, 1H), 2.82 (s, 1H), 2.65 (s, 1H), 2.06 – 1.76 (m, 4H), 1.77 – 1.63 (m, 1H), 1.64 – 1.54 (m, 2H), 1.49 (d, *J* = 12.7 Hz, 1H), 1.38 (t, *J* = 12.9 Hz, 1H), 1.29 – 1.07 (m, 1H) ppm. <sup>13</sup>C NMR (151 MHz, DMSO-d<sub>6</sub>) δ = 75.0, 73.1, 42.8, 37.3, 34.3, 29.8, 28.4, 25.2, 14.9 ppm. HRMS (ESI): calc'd for: C<sub>9</sub>H<sub>18</sub>NO [M+H]<sup>+</sup> 156.1388; found 156.1388.

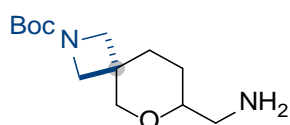

**Tert-butyl 7-(aminomethyl)-6-oxa-2-azaspiro[3.5]nonane-2-carboxylate (35b)**

General procedure E was used. Yield: 2 g, 79%, white solid, mp = 56-58 °C. <sup>1</sup>H NMR (400 MHz, CDCl<sub>3</sub>) δ = 3.94 (dd, *J* = 11.2, 1.9 Hz, 1H), 3.78 (d, *J* = 8.4 Hz, 1H), 3.59 (d, *J* = 8.4 Hz, 1H), 3.48 – 3.40 (m, 2H), 3.35 (d, *J* = 11.3 Hz, 1H), 3.21 – 3.11 (m, 1H), 2.69 – 2.57 (m, 2H), 2.03 – 1.93 (m, 1H), 1.63 – 1.44 (m, 2H), 1.39 (s, 9H), 1.31 (s, 2H), 1.27 – 1.14 (m, 1H) ppm. <sup>13</sup>C NMR (126 MHz, CDCl<sub>3</sub>) δ = 156.5, 79.4, 78.9, 74.3, 59.0 (br s), 55.7 (br s), 47.0, 33.8, 32.9, 28.5, 25.9 ppm. LCMS (M+H)<sup>+</sup>: 257. HRMS (ESI): calc'd for: C<sub>13</sub>H<sub>25</sub>N<sub>2</sub>O<sub>3</sub> [M+H]<sup>+</sup> 257.1865; found 257.1868.

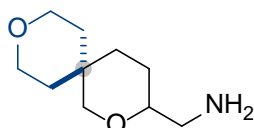

**(2,9-Dioxaspiro[5.5]undecan-3-yl)methanamine (36b)**

General procedure E was used. Yield: 1.7g, 86%, yellow oil. <sup>1</sup>H NMR (400 MHz, CDCl<sub>3</sub>) δ = 3.87 (dd, *J* = 11.4, 2.6 Hz, 1H), 3.70 – 3.63 (m, 2H), 3.62 – 3.46 (m, 2H), 3.25 – 3.16 (m, 1H), 3.11 (d, *J* = 11.4 Hz, 1H), 2.67 (d, *J* = 5.6 Hz, 2H), 1.83 (dd, *J* = 13.1, 3.1 Hz, 1H), 1.78 – 1.67 (m, 1H), 1.61 – 1.52 (m, 1H), 1.53 – 1.33 (m, 4H), 1.31 – 1.19 (m, 3H) ppm. <sup>13</sup>C NMR (151 MHz, CDCl<sub>3</sub>) δ = 80.2, 75.6, 63.9, 63.3, 47.3, 36.0, 34.0, 31.7, 30.4, 24.6 ppm. GCMS (M): 185. HRMS (ESI): calc'd for C<sub>10</sub>H<sub>20</sub>NO<sub>2</sub> [M+H]<sup>+</sup> 186.1494; found 186.1487.

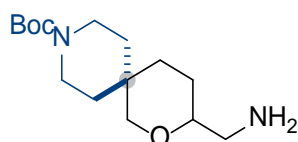

***Tert*-butyl 3-(aminomethyl)-2-oxa-9-azaspiro[5.5]undecane-9-carboxylate (37b)**

General procedure E was used. Yield: 1.7 g, 84%, colorless oil.  $^1\text{H}$  NMR (400 MHz, DMSO- $d_6$ )  $\delta$  = 3.72 (dd,  $J$  = 11.2, 2.2 Hz, 1H), 3.33 – 3.20 (m, 4H), 3.16 – 3.07 (m, 1H), 3.03 (d,  $J$  = 11.3 Hz, 1H), 2.56 – 2.50 (m, 2H), 2.50 – 2.45 (m, 1H), 1.81 – 1.67 (m, 1H), 1.57 – 1.40 (m, 3H), 1.38 (s, 9H), 1.35 – 1.11 (m, 5H) ppm.  $^{13}\text{C}$  NMR (126 MHz, DMSO- $d_6$ )  $\delta$  = 153.9, 79.8, 78.4, 74.4, 46.9, 34.7, 32.4, 30.7, 30.2, 28.1, 24.3 ppm. LCMS ( $\text{M}+\text{H}$ ) $^+$ : 185. HRMS (ESI): calc'd for:  $\text{C}_{15}\text{H}_{29}\text{N}_2\text{O}_3$  [ $\text{M}+\text{H}$ ] $^+$  285.2178; found 285.2179.

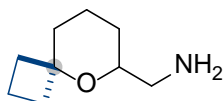**(5-Oxaspiro[3.5]nonan-6-yl)methanamine hydrochloride (38b)**

General procedure E was used. Yield: 1.8 g, 94%, yellow solid, mp = 171-172 °C.  $^1\text{H}$  NMR (400 MHz, DMSO- $d_6$ )  $\delta$  = 8.17 (br s, 3H), 3.53 (t,  $J$  = 10.0 Hz, 1H), 3.38 (s, 1H), 2.82 (s, 1H), 2.63 (s, 1H), 2.15 – 2.00 (m, 1H), 2.02 – 1.87 (m, 2H), 1.86 – 1.59 (m, 4H), 1.59 – 1.38 (m, 2H), 1.33 – 1.19 (m, 1H), 1.14 – 0.91 (m, 1H) ppm.  $^{13}\text{C}$  NMR (151 MHz, DMSO- $d_6$ )  $\delta$  = 76.6, 67.9, 42.9, 34.2, 32.7, 30.3, 27.8, 19.2 12.2 ppm. LCMS ( $\text{M}+\text{H}$ ) $^+$ : 156. HRMS (ESI): calc'd for:  $\text{C}_9\text{H}_{18}\text{NO}$  [ $\text{M}+\text{H}$ ] $^+$  156.1388; found 156.1382.

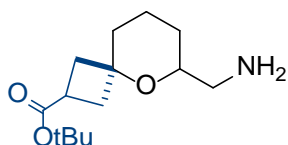***Tert*-butyl 6-(aminomethyl)-5-oxaspiro[3.5]nonane-2-carboxylate (39b)**

General procedure E was used. Yield: 2.4 g, 93%, brown oil.  $^1\text{H}$  NMR (400 MHz,  $\text{CDCl}_3$ )  $\delta$  = 3.36 – 3.23 (m, 1H), 2.70 – 2.63 (m, 2H), 2.65 – 2.54 (m, 1H), 2.36 – 2.23 (m, 2H), 2.21 – 2.04 (m, 2H), 1.83 (br s, 2H), 1.76 – 1.62 (m, 2H), 1.61 – 1.47 (m, 1H), 1.44 (s, 9H), 1.28 – 1.13 (m, 2H) ppm. HRMS (ESI): calc'd for:  $\text{C}_{14}\text{H}_{26}\text{NO}_3$  [ $\text{M}+\text{H}$ ] $^+$  256.1913; found 256.1907.

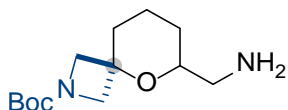***Tert*-butyl 6-(aminomethyl)-5-oxa-2-azaspiro[3.5]nonane-2-carboxylate (40b)**

General procedure E was used. Yield: 2.2 g, 87%, white oil.  $^1\text{H}$  NMR (400 MHz,  $\text{CDCl}_3$ )  $\delta$  = 3.86 – 3.77 (m, 2H), 3.69 (t,  $J$  = 9.5 Hz, 2H), 3.35 – 3.20 (m, 1H), 2.68 (d,  $J$  = 5.7 Hz, 2H), 1.83 (d,  $J$  = 10.9 Hz, 1H), 1.78 (d,  $J$  = 10.8 Hz, 1H), 1.59 – 1.42 (m, 5H), 1.41 (s, 9H), 1.25 – 1.13 (m, 1H) ppm.  $^{13}\text{C}$  NMR (126 MHz,  $\text{CDCl}_3$ )  $\delta$  = 156.6, 79.6, 75.3, 72.4, 60.7 (br s), 58.5 (br s), 47.2, 33.1,

28.5, 27.9, 20.0 ppm. LCMS (M+H)<sup>+</sup>: 257. HRMS (ESI): calc'd for: C<sub>13</sub>H<sub>25</sub>N<sub>2</sub>O<sub>3</sub> [M+H]<sup>+</sup> 257.1865; found 257.1861.

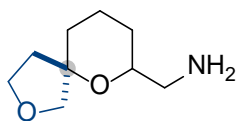

**2,6-Dioxaspiro[4.5]decan-7-ylmethanamine hydrochloride (41b)**

General procedure E was used. Yield: 1.9 g, 92%, beige solid, mp = 168-170 °C. Mixture of stereoisomers (d.r. = 1:1). <sup>1</sup>H NMR (400 MHz, DMSO-d<sub>6</sub>) δ = 8.16 (s, 3H), 3.87 (t, *J* = 8.6 Hz, 1H), 3.81 – 3.60 (m, 3H), 3.53 (d, *J* = 9.4 Hz), 3.44 (d, *J* = 9.1 Hz, 1H), 2.93 – 2.78 (m, 1H), 2.75 – 2.57 (m, 1H), 2.28 – 2.14 (m), 2.04 – 1.84 (m, 1H), 1.82 – 1.63 (m, 2H), 1.62 – 1.24 (m, 4H), 1.17 – 1.05 (m, 1H) ppm. <sup>13</sup>C NMR (151 MHz, DMSO-d<sub>6</sub>) δ = 83.1, 82.8, 78.7, 72.5, 69.0, 68.6, 67.4, 65.9, 43.2, 43.1, 40.8, 33.1, 32.6, 31.5, 27.8, 27.7, 20.4, 20.1 ppm. LCMS (M+H)<sup>+</sup>: 172. HRMS (ESI): calc'd for: C<sub>9</sub>H<sub>18</sub>NO<sub>2</sub> [M+H]<sup>+</sup> 172.1338; found 172.1336.

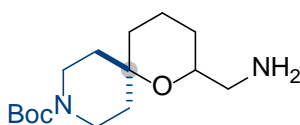

**Tert-butyl 2-(aminomethyl)-1-oxa-9-azaspiro[5.5]undecane-9-carboxylate (42b)**

General procedure E was used. Yield: 2.4 g, 84%, brown oil. <sup>1</sup>H NMR (400 MHz, CDCl<sub>3</sub>) δ = 3.73 (br s, 2H), 3.50 – 3.39 (m, 1H), 3.19 (br s, 1H), 2.98 (t, *J* = 11.3 Hz, 1H), 2.64 (d, *J* = 5.5 Hz, 2H), 2.20 – 2.11 (m, 1H), 1.66 – 1.58 (m, 2H), 1.58 – 1.44 (m, 6H), 1.43 (s, 9H), 1.35 – 1.07 (m, 3H) ppm. <sup>13</sup>C NMR (126 MHz, CDCl<sub>3</sub>) δ = 155.1, 79.3, 71.4, 70.3, 48.0, 39.5, 35.8, 29.3, 29.1, 28.6, 18.9 ppm. LCMS (M+H)<sup>+</sup>: 285. HRMS (ESI): calc'd for: C<sub>15</sub>H<sub>29</sub>N<sub>2</sub>O<sub>3</sub> [M+H]<sup>+</sup> 285.2178; found 285.2184.

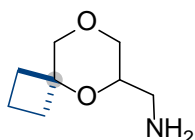

**(5,8-Dioxaspiro[3.5]nonan-6-yl)methanamine hydrochloride (43b)**

General procedure E was used. Yield: 1.4 g, 72%, yellow solid, mp 140-141 °C. <sup>1</sup>H NMR (400 MHz, DMSO-d<sub>6</sub>) δ 8.25 (br s, 3H), 3.81 (t, *J* = 9.4 Hz, 1H), 3.73 (t, *J* = 12.0 Hz, 2H), 3.24 – 3.06 (m, 2H), 2.85 (d, *J* = 11.3 Hz, 1H), 2.70 – 2.59 (m, 1H), 2.17 – 2.06 (m, 1H), 2.06 – 1.88 (m, 2H), 1.83 – 1.65 (m, 2H), 1.64 – 1.47 (m, 1H) ppm. <sup>13</sup>C NMR (151 MHz, DMSO-d<sub>6</sub>) δ 74.7, 70.8, 67.2, 66.9, 30.0, 29.9, 12.1 ppm. HRMS (ESI): calc'd for: C<sub>8</sub>H<sub>16</sub>NO<sub>2</sub> [M+H]<sup>+</sup> 158.1181; found 158.1177.

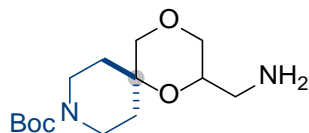

**Tert-butyl 2-(aminomethyl)-1,4-dioxo-9-azaspiro[5.5]undecane-9-carboxylate (44b)**

General procedure E was used. Yield: 2.2 g, 78%, colorless oil.  $^1\text{H}$  NMR (400 MHz,  $\text{CDCl}_3$ )  $\delta$  = 3.92 – 3.58 (m, 5H), 3.51 (d,  $J$  = 11.4 Hz, 1H), 3.25 – 3.12 (m, 3H), 3.04 (t,  $J$  = 11.2 Hz, 1H), 2.67 – 2.61 (m, 2H), 2.32 (d,  $J$  = 13.9 Hz, 1H), 1.43 (s, 9H), 1.42 – 1.32 (m, 5H) ppm.  $^{13}\text{C}$  NMR (126 MHz,  $\text{CDCl}_3$ )  $\delta$  = 155.0, 79.5, 74.2, 69.7, 69.6, 69.5, 43.6, 39.0 (br s), 34.1, 28.8, 28.6 ppm. LCMS ( $\text{M}+\text{H}$ ) $^+$ : 287. HRMS (ESI): calc'd for:  $\text{C}_{14}\text{H}_{27}\text{N}_2\text{O}_4$  [ $\text{M}+\text{H}$ ] $^+$  287.1971; found 287.1973.

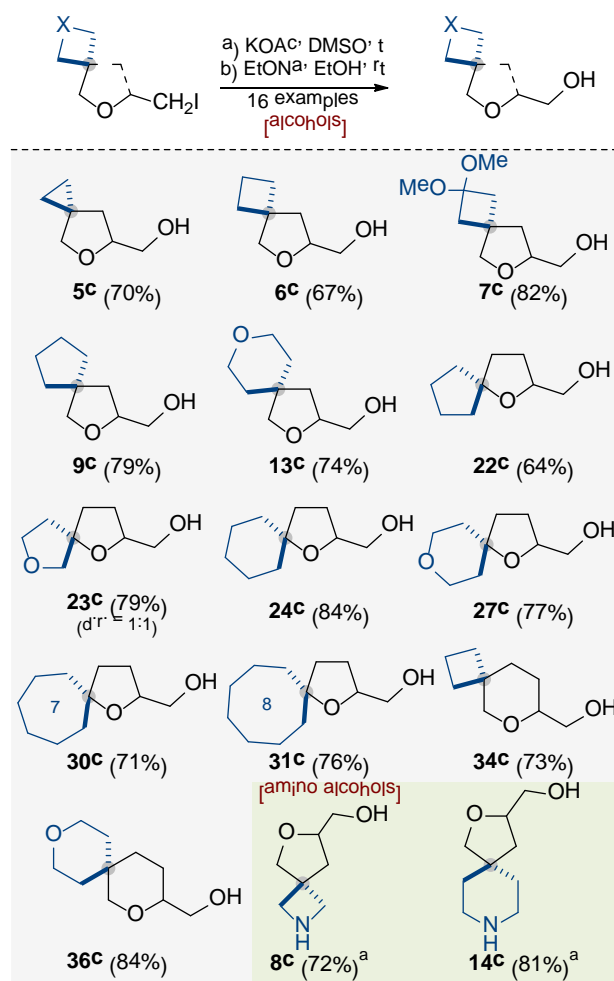

**Scheme SI-1.** Synthesis of *oxa*-spirocyclic alcohols **5c-7c**, **9c**, **8c**, **13c**, **14c**, **22c-24c**, **27c**, **30c**, **31c**, **34c**, **36c**. <sup>(a)</sup> After acidic *N*-Boc deprotection.

**General procedure F for synthesis 5c-7c, 9c, 8c, 13c, 14c, 22c-24c, 27c, 30c, 31c, 34c and 36c** (**5c** as an example. Scale: 0.1 mol for all derivatives).

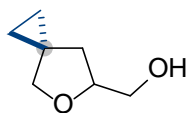

**(5-Oxaspiro[2.4]heptan-6-yl)methanol (5c)**

To a solution of **5a** (23.8 g, 0.1 mol, 1.0 equiv) in DMSO (130 mL) was added KOAc (29.4 g, 0.3 mol, 3.0 equiv). The mixture was vigorously stirred at 90 °C for 24 h. The mixture was diluted with water (130 mL) and extracted with MTBE (5 times). The combined organic layers were washed with brine (3 times), dried over Na<sub>2</sub>SO<sub>4</sub>, filtered and concentrated under reduced pressure to give the title product as yellow oil. The residue (17.0 g, 0.1 mol, 1.0 equiv) was dissolved in EtOH (200 mL) and EtONa (10.2 g, 0.15 mol, 1.5 equiv) was added in portions at 5-10 °C under Ar. The mixture was vigorously stirred overnight at room temperature. After that NH<sub>4</sub>Cl (5.3 g, 0.1 mol, 1.0 equiv) was added, and the mixture was stirred for 2 h at room temperature. The precipitate was filtered, washed with MTBE. The filtrate was dried over Na<sub>2</sub>SO<sub>4</sub>, filtered and concentrated under reduced pressure to give the title product as brown oil. The final product was purified by column chromatography (hexane/EtOAc, gradient, 4:1 to 1:3). Yield: 8.9 g, 70%, colorless oil. <sup>1</sup>H NMR (400 MHz, CDCl<sub>3</sub>) δ = 4.32 – 4.15 (m, 1H), 3.73 – 3.56 (m, 4H), 2.25 (s, 1H), 1.88 – 1.69 (m, 2H), 0.79 – 0.39 (m, 4H) ppm. <sup>13</sup>C NMR (126 MHz, CDCl<sub>3</sub>) δ = 143.2, 80.3, 75.3, 65.0, 36.6, 22.6, 11.1, 10.6 ppm. HRMS (ESI): calc'd for: C<sub>7</sub>H<sub>13</sub>O<sub>2</sub> [M+H]<sup>+</sup> 129.0916; found 129.0914.

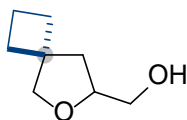

**(6-Oxaspiro[3.4]octan-7-yl)methanol (6c)**

General procedure F was used. Yield: 9.5 g, 67%, colorless oil. <sup>1</sup>H NMR (400 MHz, CDCl<sub>3</sub>) δ = 4.06 – 3.98 (m, 1H), 3.73 (s, 2H), 3.63 (dd, *J* = 11.6, 3.2 Hz, 1H), 3.46 (dd, *J* = 11.6, 6.0 Hz, 1H), 2.29 (s, 1H), 2.02 – 1.93 (m, 5H), 1.93 – 1.79 (m, 2H), 1.70 (dd, *J* = 12.4, 8.1 Hz, 1H) ppm. <sup>13</sup>C NMR (151 MHz, CDCl<sub>3</sub>) δ = 79.3, 79.0, 65.1, 46.2, 40.8, 32.8, 31.1, 16.4 ppm. GCMS (M): 142. HRMS (ESI): calc'd for C<sub>8</sub>H<sub>15</sub>O<sub>2</sub> [M+H]<sup>+</sup> 143.1072; found 143.1075.

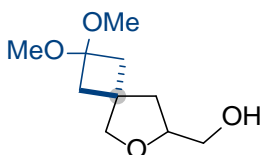

**(2,2-Dimethoxy-6-oxaspiro[3.4]octan-7-yl)methanol (7c)**

General procedure F was used. Yield: 16.5 g, 82%, yellow oil. <sup>1</sup>H NMR (400 MHz, CDCl<sub>3</sub>) δ = 4.12 – 3.99 (m, 1H), 3.83 – 3.70 (m, 2H), 3.65 (dd, *J* = 11.7, 3.0 Hz, 1H), 3.53 – 3.41 (m, 1H), 3.13 (s, 3H), 3.12 (s, 3H), 2.29 (br s, 1H), 2.22 – 2.09 (m, 4H), 2.00 (dd, *J* = 12.6, 7.0 Hz, 1H), 1.79 (dd,

$J = 12.5, 8.1$  Hz, 1H) ppm.  $^{13}\text{C}$  NMR (151 MHz,  $\text{CDCl}_3$ )  $\delta = 99.4, 79.4, 79.1, 64.9, 48.7, 48.6, 42.4, 40.97, 40.96, 36.7$  ppm. HRMS (ESI): calc'd for  $\text{C}_{10}\text{H}_{19}\text{O}_4$   $[\text{M}+\text{H}]^+$  203.1283; found 203.1280.

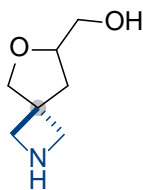

**(6-Oxa-2-azaspiro[3.4]octan-7-yl)methanol (8c)**

General procedure F was used. Yield: 10.3 g, 72%, yellow oil.  $^1\text{H}$  NMR (400 MHz,  $\text{DMSO-d}_6$ )  $\delta = 3.92 - 3.76$  (m, 4H), 3.70 (d,  $J = 8.5$  Hz, 1H), 3.57 – 3.40 (m, 3H), 3.31 (d,  $J = 4.9$  Hz, 2H), 2.07 (dd,  $J = 12.6, 7.1$  Hz, 1H), 1.80 (dd,  $J = 12.6, 7.3$  Hz, 1H) ppm.  $^{13}\text{C}$  NMR (126 MHz,  $\text{DMSO-d}_6$ )  $\delta = 79.2, 76.7, 63.6, 56.0$  (br s), 55.7 (br s), 39.5 ppm. LCMS  $(\text{M}+\text{H})^+$ : 144. HRMS (ESI): calc'd for:  $\text{C}_7\text{H}_{14}\text{NO}_2$   $[\text{M}+\text{H}]^+$  144.1025; found 144.1020.

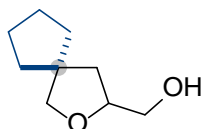

**(2-Oxaspiro[4.4]nonan-3-yl)methanol (9c)**

General procedure F was used. Yield: 12.3 g, 79%, yellow oil.  $^1\text{H}$  NMR (400 MHz,  $\text{CDCl}_3$ )  $\delta = 4.17 - 4.03$  (m, 1H), 3.67 (dd,  $J = 11.7, 3.1$  Hz, 1H), 3.59 (q,  $J = 8.1$  Hz, 2H), 3.51 (dd,  $J = 11.6, 6.1$  Hz, 1H), 2.66 (br s, 1H), 1.80 (dd,  $J = 12.2, 6.8$  Hz, 1H), 1.72 – 1.35 (m, 9H) ppm.  $^{13}\text{C}$  NMR (151 MHz,  $\text{CDCl}_3$ )  $\delta = 79.9, 78.7, 65.2, 51.1, 40.6, 37.6, 36.3, 24.9, 24.9$  ppm. HRMS (ESI): calc'd for  $\text{C}_9\text{H}_{17}\text{O}_2$   $[\text{M}+\text{H}]^+$  157.1229; found 157.1223.

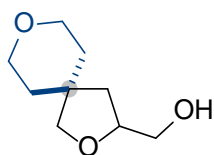

**(2,8-Dioxaspiro[4.5]decan-3-yl)methanol (13c)**

General procedure F was used. Yield: 12.7 g, 74%, yellow oil.  $^1\text{H}$  NMR (400 MHz,  $\text{CDCl}_3$ )  $\delta = 4.16 - 3.99$  (m, 1H), 3.72 – 3.56 (m, 7H), 3.55 – 3.43 (m, 1H), 2.38 (br s, 1H), 1.87 (dd,  $J = 12.5, 7.0$  Hz, 1H), 1.66 – 1.36 (m, 5H) ppm.  $^{13}\text{C}$  NMR (151 MHz,  $\text{CDCl}_3$ )  $\delta = 79.2, 78.0, 65.8, 65.5, 64.9, 41.7, 39.0, 36.1, 35.6$  ppm. GCMS (M): 172. HRMS (ESI): calc'd for  $\text{C}_9\text{H}_{17}\text{O}_3$   $[\text{M}+\text{H}]^+$  173.1178; found 173.1175.



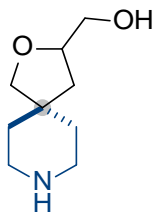

**(2-Oxa-8-azaspiro[4.5]decan-3-yl)methanol (14c)**

General procedure F was used. Yield: 13.8 g, 81%, brown oil.  $^1\text{H}$  NMR (400 MHz,  $\text{CDCl}_3$ )  $\delta$  = 4.16 – 3.97 (m, 1H), 3.72 – 3.53 (m, 3H), 3.53 – 3.41 (m, 1H), 2.91 – 2.65 (m, 6H), 1.82 (dd,  $J$  = 12.5, 7.0 Hz, 1H), 1.63 – 1.51 (m, 3H), 1.47 (dd,  $J$  = 12.5, 8.9 Hz, 1H) ppm.  $^{13}\text{C}$  NMR (126 MHz,  $\text{CDCl}_3$ )  $\delta$  = 79.3, 78.1, 64.9, 44.2, 43.8, 42.6, 39.4, 36.3, 35.6 ppm. GCMS (M): 171. HRMS (ESI): calc'd for  $\text{C}_9\text{H}_{18}\text{NO}_2$   $[\text{M}+\text{H}]^+$  172.1338; found 172.1331.

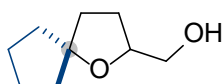

**(1-Oxaspiro[4.4]nonan-2-yl)methanol (22c)**

General procedure F was used. Yield: 10 g, 64%, colorless oil.  $^1\text{H}$  NMR (400 MHz,  $\text{CDCl}_3$ )  $\delta$  = 4.05 – 3.96 (m, 1H), 3.61 (dd,  $J$  = 11.4, 3.4 Hz, 1H), 3.45 (dd,  $J$  = 11.4, 5.7 Hz, 1H), 2.44 (s, 1H), 1.98 – 1.87 (m, 1H), 1.84 – 1.63 (m, 7H), 1.62 – 1.39 (m, 4H) ppm.  $^{13}\text{C}$  NMR (126 MHz,  $\text{CDCl}_3$ )  $\delta$  = 92.0, 78.6, 65.5, 38.9, 38.2, 36.6, 27.8, 24.1 ppm. GCMS (M): 156. HRMS (ESI): calc'd for  $\text{C}_9\text{H}_{17}\text{O}_2$   $[\text{M}+\text{H}]^+$  157.1229; found 157.1225.

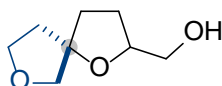

**1,7-Dioxaspiro[4.4]nonan-2-yl)methanol (23c)**

General procedure F was used. Yield: 12.5 g, 79%, colorless oil. Mixture of stereoisomers (d.r. = 1:1).  $^1\text{H}$  NMR (400 MHz,  $\text{CDCl}_3$ )  $\delta$  = 4.15 – 4.00 (m, 1H), 3.99 – 3.82 (m, 2H), 3.77 (dd,  $J$  = 15.9, 9.2 Hz, 1H), 3.71 – 3.43 (m, 3H), 2.28 (br s, 1H), 2.14 – 2.02 (m, 1H), 2.02 – 1.67 (m, 5H) ppm.  $^{13}\text{C}$  NMR (151 MHz,  $\text{CDCl}_3$ )  $\delta$  = 90.0, 89.9, 79.5, 79.3, 77.4, 77.0, 68.0, 68.0, 65.1, 39.3, 38.6, 34.0, 33.6, 27.6, 27.6 ppm. GCMS (M): 158. HRMS (ESI): calc'd for  $\text{C}_8\text{H}_{15}\text{O}_3$   $[\text{M}+\text{H}]^+$  159.1021; found 159.1023.

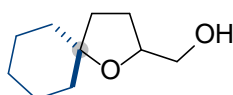

**(1-Oxaspiro[4.5]decan-2-yl)methanol (24c)**

General procedure F was used. Yield: 14.3 g, 84%, colorless oil.  $^1\text{H}$  NMR (400 MHz,  $\text{CDCl}_3$ )  $\delta$  = 4.13 – 4.00 (m, 1H), 3.65 (dd,  $J$  = 11.3, 3.4 Hz, 1H), 3.45 (dd,  $J$  = 11.3, 5.5 Hz, 1H), 2.12 (br s, 1H),

1.98 – 1.84 (m, 1H), 1.78 – 1.63 (m, 5H), 1.59 – 1.45 (m, 4H), 1.42 – 1.27 (m, 4H) ppm.  $^{13}\text{C}$  NMR (126 MHz,  $\text{CDCl}_3$ )  $\delta$  = 83.5, 78.3, 65.4, 38.5, 37.4, 36.1, 27.2, 25.8, 24.2, 23.9 ppm. GCMS (M): 170. HRMS (ESI): calc'd for  $\text{C}_{10}\text{H}_{19}\text{O}_2$   $[\text{M}+\text{H}]^+$  171.1385; found 171.1388.

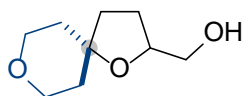

**(1,8-Dioxaspiro[4.5]decan-2-yl)methanol (27c)**

General procedure F was used. Yield: 13.2 g, 77%, colorless oil.  $^1\text{H}$  NMR (400 MHz,  $\text{CDCl}_3$ )  $\delta$  = 4.15 – 4.01 (m, 1H), 3.84 – 3.76 (m, 2H), 3.69 – 3.57 (m, 3H), 3.47 (dd,  $J$  = 11.4, 5.6 Hz, 1H), 2.12 (br s, 1H), 2.02 – 1.87 (m, 1H), 1.84 – 1.72 (m, 3H), 1.67 – 1.57 (m, 4H) ppm.  $^{13}\text{C}$  NMR (126 MHz,  $\text{CDCl}_3$ )  $\delta$  = 80.2, 78.6, 65.6, 65.5, 65.4, 38.6, 37.5, 36.7, 26.9 ppm. GCMS (M): 172. HRMS (ESI): calc'd for  $\text{C}_9\text{H}_{17}\text{O}_3$   $[\text{M}+\text{H}]^+$  173.1178; found 173.1174.

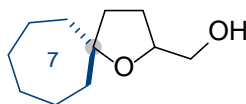

**(1-Oxaspiro[4.6]undecan-2-yl)methanol (30c)**

General procedure F was used. Yield: 13 g, 71%, colorless oil.  $^1\text{H}$  NMR (400 MHz,  $\text{CDCl}_3$ )  $\delta$  = 4.09 – 3.98 (m, 1H), 3.66 (dd,  $J$  = 11.4, 3.3 Hz, 1H), 3.45 (dd,  $J$  = 11.4, 5.3 Hz, 1H), 2.14 (br s, 1H), 1.95 – 1.82 (m, 1H), 1.80 – 1.27 (m, 14H) ppm.  $^{13}\text{C}$  NMR (151 MHz,  $\text{CDCl}_3$ )  $\delta$  = 87.2, 65.3, 41.6, 40.4, 40.1, 38.2, 29.6, 29.5, 27.1, 23.3 ppm. GCMS (M): 184. HRMS (ESI): calc'd for  $\text{C}_{11}\text{H}_{21}\text{O}_2$   $[\text{M}+\text{H}]^+$  185.1542; found 185.1538.

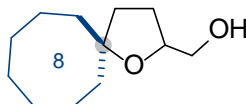

**(1-Oxaspiro[4.7]dodecan-2-yl)methanol (31c)**

General procedure F was used. Yield: 15 g, 76%, colorless oil.  $^1\text{H}$  NMR (400 MHz,  $\text{CDCl}_3$ )  $\delta$  = 4.59 – 4.47 (m, 1H), 4.15 (dd,  $J$  = 11.3, 3.4 Hz, 1H), 3.95 (dd,  $J$  = 11.3, 5.2 Hz, 1H), 2.64 (br s, 1H), 2.48 – 2.36 (m, 1H), 2.32 – 1.96 (m, 17H) ppm.  $^{13}\text{C}$  NMR (126 MHz,  $\text{CDCl}_3$ )  $\delta$  = 87.0, 78.3, 65.3, 37.2, 36.8, 35.5, 28.5, 28.3, 27.4, 24.8, 23.0, 22.8 ppm. GCMS (M): 198. HRMS (ESI): calc'd for  $\text{C}_{12}\text{H}_{23}\text{O}_2$   $[\text{M}+\text{H}]^+$  199.1698; found 199.1694.

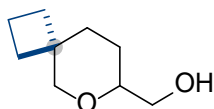

**(6-Oxaspiro[3.5]nonan-7-yl)methanol (34c)**

General procedure F was used. Yield: 11.4 g, 73%, yellow oil.  $^1\text{H}$  NMR (400 MHz,  $\text{CDCl}_3$ )  $\delta$  = 3.85 (dd,  $J$  = 11.1, 2.2 Hz, 1H), 3.60 – 3.38 (m, 2H), 3.36 – 3.26 (m, 1H), 3.23 (d,  $J$  = 11.0 Hz, 1H), 2.28 (s, 1H), 2.06 – 1.92 (m, 1H), 1.88 – 1.80 (m, 3H), 1.78 – 1.70 (m, 1H), 1.64–1.53 (m, 2H), 1.45 – 1.21 (m, 3H) ppm.  $^{13}\text{C}$  NMR (151 MHz,  $\text{CDCl}_3$ )  $\delta$  = 77.9, 76.1, 66.1, 38.1, 35.5, 35.3, 30.3, 29.1, 24.2, 15.4 ppm. GCMS (M): 184. HRMS (ESI): calc'd for  $\text{C}_9\text{H}_{17}\text{O}_2$   $[\text{M}+\text{H}]^+$  157.1229; found 157.1227.

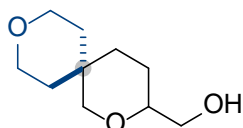

**(2,9-Dioxaspiro[5.5]undecan-3-yl)methanol (36c)**

General procedure F was used. Yield: 15.6 g, 84%, orange oil.  $^1\text{H}$  NMR (400 MHz,  $\text{CDCl}_3$ )  $\delta$  = 3.96 – 3.84 (m, 1H), 3.70 – 3.44 (m, 6H), 3.43 – 3.31 (m, 1H), 3.14 (d,  $J$  = 11.4 Hz, 1H), 2.31 (s, 1H), 1.90 – 1.81 (m, 1H), 1.78 – 1.67 (m, 1H), 1.62 – 1.54 (m, 1H), 1.54 – 1.40 (m, 1H), 1.40 – 1.16 (m, 4H) ppm.  $^{13}\text{C}$  NMR (151 MHz,  $\text{CDCl}_3$ )  $\delta$  = 78.8, 75.5, 66.0, 63.9, 63.3, 36.0, 33.6, 31.6, 30.5, 22.9 ppm. GCMS (M): 186. HRMS (ESI): calc'd for  $\text{C}_{10}\text{H}_{19}\text{O}_3$   $[\text{M}+\text{H}]^+$  187.1334; found 187.1331.

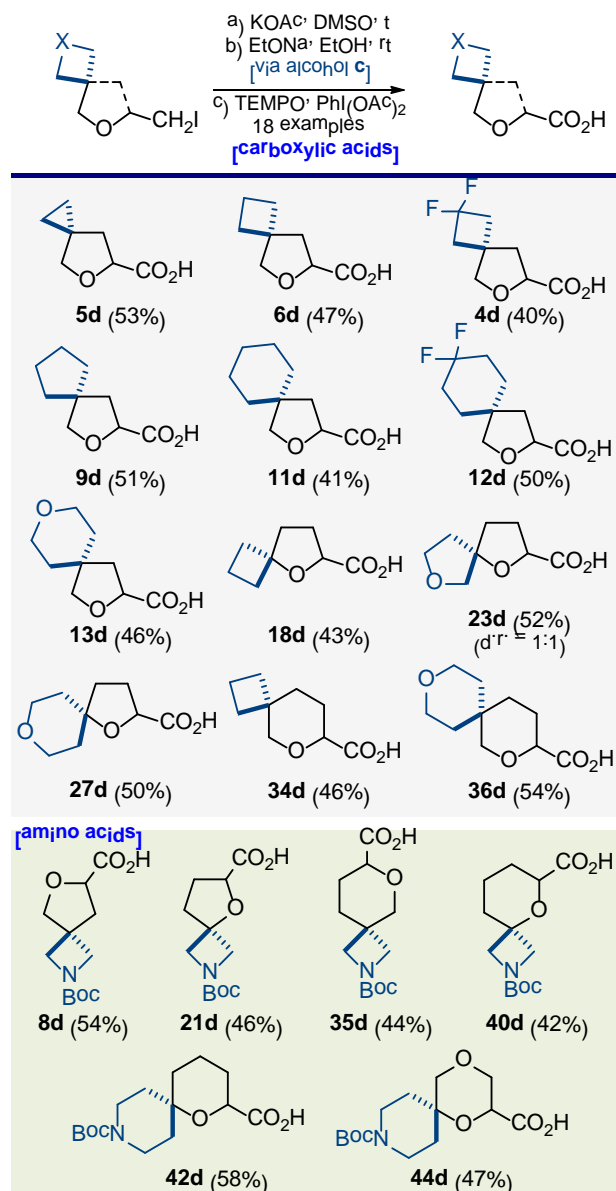

**Scheme 4.** Synthesis of *oxa*-spirocyclic carboxylic acids and amino acids **4d-6d**, **8d**, **9d**, **11d-13d**, **18d**, **21d**, **23d**, **27d**, **34d-36d**, **40d**, **42d** and **44d**.

**General procedure G** for synthesis **4d-6d**, **8d**, **9d**, **11d-13d**, **18d**, **21d**, **23d**, **27d**, **34d-36d**, **40d**, **42d** and **44d** (**4d** as an example. Scale: 0.1 mol for all derivatives).

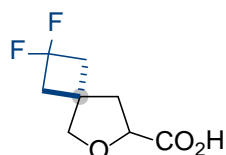

### 2,2-Difluoro-6-oxaspiro[3.4]octane-7-carboxylic acid (**4d**)

TEMPO (3.1 g, 0.02 mol, 0.2 equiv) and PhI(OAc)<sub>2</sub> (64.4 g, 0.2 mol, 2.0 equiv) were added to a solution of (2,2-difluoro-6-oxaspiro[3.4]octan-7-yl)methanol (17.8 g, 0.1 mol 1.0 equiv) in 2:1 CH<sub>2</sub>Cl<sub>2</sub>/H<sub>2</sub>O (200:100 mL). The mixture was stirred at room temperature for 22 h, and then poured

into a sat. aq solution of Na<sub>2</sub>S<sub>2</sub>O<sub>3</sub> (20 mL) and extracted with EtOAc (3 × 200 mL). The organic layers were combined, dried over Mg<sub>2</sub>SO<sub>4</sub>, filtered and concentrated under reduced pressure. The residue was purified by flash chromatography (hexane-EtOAc (4:1)). Yield: 7.7 g, 40%, yellow oil. <sup>1</sup>H NMR (400 MHz, CDCl<sub>3</sub>) δ = 8.85 (br s, 1H), 4.56 (t, *J* = 7.3 Hz, 1H), 4.02 (d, *J* = 8.7 Hz, 1H), 3.92 (d, *J* = 8.7 Hz, 1H), 2.61 (t, *J* = 12.1 Hz, 4H), 2.53 – 2.40 (m, 1H), 2.29 (dd, *J* = 13.0, 6.1 Hz, 1H) ppm. <sup>13</sup>C NMR (151 MHz, CDCl<sub>3</sub>) δ = 177.1, 118.6 (t, *J* = 278.0 Hz), 78.9 (dd, *J* = 5.4, 2.0 Hz), 76.1, 44.6 (t, *J* = 23.2 Hz), 44.0 (t, *J* = 23.3 Hz), 42.3 (d, *J* = 4.4 Hz), 34.8 (t, *J* = 10.1 Hz) ppm. <sup>19</sup>F NMR (376 MHz, CDCl<sub>3</sub>) δ = -90.9 (d, *J* = 197.0 Hz), -92.5 (d, *J* = 197.0 Hz) ppm. HRMS (ESI): calc'd for: C<sub>8</sub>H<sub>11</sub>F<sub>2</sub>O<sub>3</sub> [M+H]<sup>+</sup> 193.0676; found 193.0678.

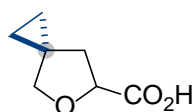

#### 5-Oxaspiro[2.4]heptane-6-carboxylic acid (5d)

General procedure G was used. Yield: 7.5 g, 53%, white solid. <sup>1</sup>H NMR (400 MHz, CDCl<sub>3</sub>) δ = 9.98 (br s, 1H), 4.66 (dd, *J* = 8.3, 5.4 Hz, 1H), 3.85 (d, *J* = 8.0 Hz, 1H), 3.79 (d, *J* = 8.0 Hz, 1H), 2.30 (dd, *J* = 12.6, 8.3 Hz, 1H), 2.07 (dd, *J* = 12.6, 5.4 Hz, 1H), 0.84 – 0.56 (m, 4H) ppm. <sup>13</sup>C NMR (151 MHz, CDCl<sub>3</sub>) δ = 177.3, 77.0, 76.1, 38.8, 21.8, 10.8, 9.4 ppm. LCMS (M+H)<sup>+</sup>: 143. HRMS (ESI): calc'd for: C<sub>7</sub>H<sub>11</sub>O<sub>3</sub> [M+H]<sup>+</sup> 143.0708; found 143.0705.

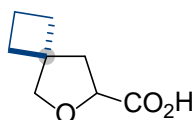

#### 6-Oxaspiro[3.4]octane-7-carboxylic acid (6d)

General procedure G was used. Yield: 7.3 g, 47%, yellow oil. <sup>1</sup>H NMR (400 MHz, CDCl<sub>3</sub>) δ = 8.76 (br s, 1H), 4.48 (dd, *J* = 8.2, 6.5 Hz, 1H), 3.93 (d, *J* = 8.4 Hz, 1H), 3.84 (d, *J* = 8.4 Hz, 1H), 2.36 (dd, *J* = 12.7, 8.4 Hz, 1H), 2.16 (dd, *J* = 12.7, 6.4 Hz, 1H), 2.10 – 1.81 (m, 6H) ppm. <sup>13</sup>C NMR (151 MHz, CDCl<sub>3</sub>) δ = 177.1, 79.9, 76.1, 45.6, 42.9, 31.4, 30.8, 16.4 ppm. HRMS (ESI): calc'd for: C<sub>8</sub>H<sub>13</sub>O<sub>3</sub> [M+H]<sup>+</sup> 157.0865; found 157.0862.

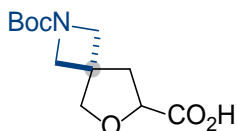

#### 2-(*Tert*-butoxycarbonyl)-6-oxa-2-azaspiro[3.4]octane-7-carboxylic acid (8d)

General procedure G was used. Yield: 13.9 g, 54%, white solid, mp = 92-93 °C. <sup>1</sup>H NMR (400 MHz, CDCl<sub>3</sub>) δ = 9.10 (br s, 2H), 4.54 (dd, *J* = 8.4, 5.1 Hz, 1H), 4.16 (d, *J* = 8.9 Hz, 1H), 3.97 (d, *J* = 8.9 Hz, 1H), 3.92 – 3.84 (m, 4H), 2.53 – 2.34 (m, 2H), 1.42 (s, 9H) ppm. <sup>13</sup>C NMR (151 MHz,

$\text{CDCl}_3$ )  $\delta$  = 175.7, 156.6, 80.6, 78.0, 76.3, 59.0, 58.0, 41.3, 40.2, 28.5 ppm. LCMS ( $\text{M-H}$ )<sup>-</sup>: 256. HRMS (ESI): calc'd for  $\text{C}_{12}\text{H}_{20}\text{NO}_5$  [ $\text{M+H}$ ]<sup>+</sup>: 258.1341; found: 258.1343.

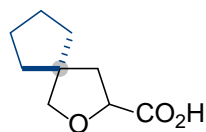

### 2-Oxaspiro[4.4]nonane-3-carboxylic acid (9d)

General procedure G was used. Yield: 8.7 g, 51%, colorless oil.  $^1\text{H}$  NMR (400 MHz,  $\text{CDCl}_3$ )  $\delta$  = 10.24 (br s, 1H), 4.54 (t,  $J$  = 7.8 Hz, 1H), 3.78 (d,  $J$  = 8.1 Hz, 1H), 3.70 (d,  $J$  = 8.0 Hz, 1H), 2.24 (dd,  $J$  = 12.6, 8.4 Hz, 1H), 2.02 (dd,  $J$  = 12.6, 7.3 Hz, 1H), 1.76 – 1.51 (m, 8H) ppm.  $^{13}\text{C}$  NMR (126 MHz,  $\text{CDCl}_3$ )  $\delta$  = 177.9, 79.8, 76.6, 50.7, 43.0, 36.7, 35.5, 25.0, 24.9 ppm. HRMS (ESI): calc'd for:  $\text{C}_9\text{H}_{15}\text{O}_3$  [ $\text{M+H}$ ]<sup>+</sup> 171.1021; found 171.1025.

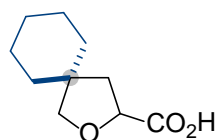

### 2-Oxaspiro[4.5]decane-3-carboxylic acid (11d)

General procedure G was used. Yield: 7.5 g, 41%, yellow oil.  $^1\text{H}$  NMR (400 MHz,  $\text{CDCl}_3$ )  $\delta$  = 7.47 (br s, 1H), 4.52 (t,  $J$  = 7.6 Hz, 1H), 3.73 (s, 2H), 2.21 (dd,  $J$  = 12.9, 8.7 Hz, 1H), 1.86 (dd,  $J$  = 12.9, 7.5 Hz, 1H), 1.49 – 1.41 (m, 8H) ppm.  $^{13}\text{C}$  NMR (151 MHz,  $\text{CDCl}_3$ )  $\delta$  = 177.5, 79.4, 76.1, 43.9, 35.3, 34.9, 26.0, 24.0, 23.6 ppm. HRMS (ESI): calc'd for:  $\text{C}_{10}\text{H}_{17}\text{O}_3$  [ $\text{M+H}$ ]<sup>+</sup> 185.1178; found 185.1174.

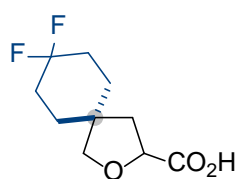

### 8,8-Difluoro-2-oxaspiro[4.5]decane-3-carboxylic acid (12d)

General procedure G was used. Yield: 11.0 g, 50%, yellow solid, mp = 67-69 °C.  $^1\text{H}$  NMR (400 MHz,  $\text{CDCl}_3$ )  $\delta$  = 9.50 (br s, 1H), 4.58 (t,  $J$  = 8.0 Hz, 1H), 3.83 – 3.71 (m, 2H), 2.26 (dd,  $J$  = 12.9, 8.9 Hz, 1H), 2.02 – 1.80 (m, 5H), 1.76 – 1.62 (m, 4H) ppm.  $^{13}\text{C}$  NMR (126 MHz,  $\text{CDCl}_3$ )  $\delta$  = 177.5, 122.9 (t,  $J$  = 241.3 Hz), 78.1, 76.0, 42.7, 40.6, 31.8 (t,  $J$  = 24.8 Hz), 31.5 (t,  $J$  = 25.5 Hz), 31.2, 30.9 (t,  $J$  = 4.9 Hz) ppm. HRMS (ESI): calc'd for:  $\text{C}_{10}\text{H}_{15}\text{F}_2\text{O}_3$  [ $\text{M+H}$ ]<sup>+</sup> 221.0989; found 221.0985.

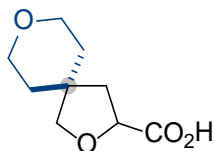

### 2,8-Dioxaspiro[4.5]decane-3-carboxylic acid (13d)

General procedure G was used. Yield: 8.6 g, 46%, yellow oil.  $^1\text{H}$  NMR (400 MHz,  $\text{CDCl}_3$ )  $\delta$  = 9.90 (br s, 1H), 4.56 (dd,  $J$  = 8.5, 7.4 Hz, 1H), 3.80 (s, 2H), 3.69 (t,  $J$  = 5.3 Hz, 2H), 3.67 – 3.61 (m, 2H), 2.30 (dd,  $J$  = 13.0, 8.7 Hz, 1H), 1.96 (dd,  $J$  = 13.0, 7.2 Hz, 1H), 1.70 – 1.53 (m, 4H) ppm.  $^{13}\text{C}$  NMR (126 MHz,  $\text{CDCl}_3$ )  $\delta$  = 177.1, 78.7, 75.9, 65.7, 65.4, 41.5, 41.4, 35.0, 34.9 ppm. LCMS ( $\text{M}-\text{H}$ ) $^-$ : 185. HRMS (ESI): calc'd for:  $\text{C}_9\text{H}_{15}\text{O}_4$  [ $\text{M}+\text{H}$ ] $^+$  187.0970; found 187.0974.

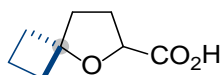

### 5-Oxaspiro[3.4]octane-6-carboxylic acid (18d)

General procedure G was used. Yield: 6.7 g, 43%, colorless oil.  $^1\text{H}$  NMR (400 MHz,  $\text{CDCl}_3$ )  $\delta$  = 8.95 (br s, 1H), 4.47 (dd,  $J$  = 8.3, 6.0 Hz, 1H), 2.45 – 2.23 (m, 3H), 2.18 – 2.05 (m, 1H), 2.05 – 1.91 (m, 4H), 1.79 – 1.64 (m, 1H), 1.61 – 1.40 (m, 1H) ppm.  $^{13}\text{C}$  NMR (151 MHz,  $\text{CDCl}_3$ )  $\delta$  = 177.1, 85.8, 76.4, 35.7, 35.3, 29.4, 12.6 ppm. GCMS (M): 156. HRMS (ESI): calc'd for  $\text{C}_8\text{H}_{13}\text{O}_3$  [ $\text{M}+\text{H}$ ] $^+$  157.0865; found 157.0862.

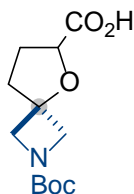

### 2-(*Tert*-butoxycarbonyl)-5-oxa-2-azaspiro[3.4]octane-6-carboxylic acid (21d)

General procedure G was used. Yield: 11.8 g, 46%, beige solid, mp = 118-120 °C.  $^1\text{H}$  NMR (400 MHz,  $\text{CDCl}_3$ )  $\delta$  = 9.38 (br s, 1H), 4.56 (t,  $J$  = 5.9 Hz, 1H), 4.20 (d,  $J$  = 9.3 Hz, 1H), 4.08 (d,  $J$  = 9.2 Hz, 1H), 3.88 (t,  $J$  = 8.6 Hz, 2H), 2.42 – 2.25 (m, 1H), 2.25 – 2.01 (m, 3H), 1.42 (s, 9H) ppm.  $^{13}\text{C}$  NMR (151 MHz,  $\text{CDCl}_3$ )  $\delta$  = 156.7, 80.3, 80.1, 77.3, 62.4, 61.5, 35.3, 29.7, 28.5 ppm. LCMS ( $\text{M}-\text{H}$ ) $^-$ : 256. HRMS (ESI): calc'd for:  $\text{C}_{12}\text{H}_{20}\text{NO}_5$  [ $\text{M}+\text{H}$ ] $^+$  258.1341; found 258.1344.

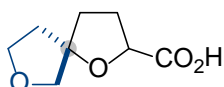

### 1,7-Dioxaspiro[4.4]nonane-2-carboxylic acid (23d)

General procedure G was used. Yield: 8.9 g, 52%, yellow oil. Mixture of stereoisomers (d.r. = 1:1).  $^1\text{H}$  NMR (400 MHz,  $\text{CDCl}_3$ )  $\delta$  = 9.77 (br s, 1H), 4.54 (dd,  $J$  = 14.1, 8.2 Hz, 1H), 4.07 – 3.79 (m, 3H), 3.66 (dd,  $J$  = 20.0, 9.4 Hz, 1H), 2.46 – 2.09 (m, 3H), 2.08 – 1.84 (m, 3H) ppm.  $^{13}\text{C}$  NMR (126 MHz,  $\text{CDCl}_3$ )  $\delta$  = 177.1, 78.7, 75.9, 65.7, 65.4, 41.5, 41.4, 35.0, 34.9 ppm.

MHz, CDCl<sub>3</sub>)  $\delta$  = 177.0, 176.9, 92.0, 76.8, 76.7, 76.63, 76.57, 68.1, 67.9, 38.7, 38.5, 33.3, 33.2, 30.7, 30.6 ppm. GCMS (M): 172. HRMS (ESI): calc'd for C<sub>8</sub>H<sub>13</sub>O<sub>4</sub> [M+H]<sup>+</sup> 173.0814; found 173.0811.

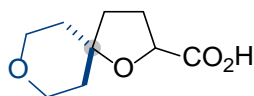

#### 1,8-Dioxaspiro[4.5]decane-2-carboxylic acid (27d)

General procedure G was used. Yield: 9.3 g, 50%, white solid, mp = 86-87 °C. Mixture of stereoisomers (d.r. = 1:2). <sup>1</sup>H NMR (400 MHz, CDCl<sub>3</sub>)  $\delta$  = 5.82 (br s, 1H), 4.55 (dd, *J* = 8.3, 5.9 Hz, 1H), 3.92 – 3.62 (m, 4H), 2.66 – 1.99 (m, 3H), 1.95 – 1.42 (m, 5H) ppm. <sup>13</sup>C NMR (126 MHz, CDCl<sub>3</sub>)  $\delta$  = 176.7, 176.4, 83.1, 82.7, 76.2, 65.4, 65.2, 64.3, 37.6, 37.2, 37.1, 36.0, 33.4, 29.6, 28.3 ppm. HRMS (ESI): calc'd for C<sub>9</sub>H<sub>15</sub>O<sub>4</sub> [M+H]<sup>+</sup> 187.0970; found 187.0966.

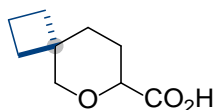

#### 6-Oxaspiro[3.5]nonane-7-carboxylic acid (34d)

General procedure G was used. Yield: 7.8 g, 46%, yellow solid. <sup>1</sup>H NMR (400 MHz, CDCl<sub>3</sub>)  $\delta$  = 9.46 (br s, 1H), 3.95 (d, *J* = 12.3 Hz, 1H), 3.93 – 3.89 (m, 1H), 3.33 (d, *J* = 11.3 Hz, 1H), 2.07 – 1.82 (m, 5H), 1.80 – 1.70 (m, 1H), 1.69 – 1.56 (m, 3H), 1.55 – 1.43 (m, 1H) ppm. <sup>13</sup>C NMR (151 MHz, CDCl<sub>3</sub>)  $\delta$  = 175.6, 75.9, 75.2, 35.0, 30.1, 28.8, 25.4, 15.3 ppm. LCMS (M-H)<sup>-</sup>: 169. HRMS (ESI): calc'd for: C<sub>9</sub>H<sub>15</sub>O<sub>3</sub> [M+H]<sup>+</sup> 171.1021; found 171.1020.

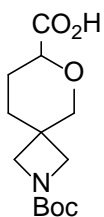

#### 2-(*Tert*-butoxycarbonyl)-6-oxa-2-azaspiro[3.5]nonane-7-carboxylic acid (35d)

General procedure G was used. Yield: 12.5 g, 46%, yellow solid, mp = 126-128 °C. <sup>1</sup>H NMR (400 MHz, DMSO-d<sub>6</sub>)  $\delta$  = 12.62 (br s, 1H), 3.93 – 3.84 (m, 2H), 3.63 – 3.52 (m, 2H), 3.49 – 3.41 (m, 3H), 1.89 (d, *J* = 13.5 Hz, 1H), 1.83 – 1.75 (m, 1H), 1.72 – 1.62 (m, 1H), 1.55 – 1.45 (m, 1H), 1.37 (s, 9H) ppm. <sup>13</sup>C NMR (151 MHz, DMSO-d<sub>6</sub>)  $\delta$  = 172.0, 155.6, 78.5, 74.1, 72.3, 32.8, 31.4, 28.1, 25.0 ppm. LCMS (M-H)<sup>-</sup>: 270. HRMS (ESI): calc'd for: C<sub>13</sub>H<sub>22</sub>NO<sub>5</sub> [M+H]<sup>+</sup> 272.1498; found 272.14915.



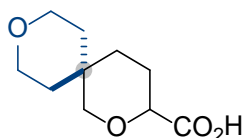

### 2,9-Dioxaspiro[5.5]undecane-3-carboxylic acid (36d)

General procedure G was used. Yield: 10.8 g, 54%, orange oil.  $^1\text{H}$  NMR (400 MHz,  $\text{CDCl}_3$ )  $\delta$  = 9.75 (br s, 1H), 4.06 – 3.92 (m, 2H), 3.76 – 3.53 (m, 4H), 1.99 – 1.72 (m, 4H), 1.68 – 1.30 (m, 4H) ppm.  $^{13}\text{C}$  NMR (151 MHz,  $\text{CDCl}_3$ )  $\delta$  = 175.1, 76.1, 75.1, 63.8, 63., 35., 33.8, 31.6, 30.1, 24.1 ppm. LCMS (M-H) $^-$ : 199. HRMS (ESI): calc'd for:  $\text{C}_{10}\text{H}_{17}\text{O}_4$  [M+H] $^+$  201.1127; found 201.1125.

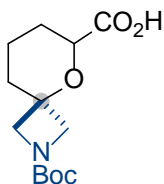

### 2-(*Tert*-butoxycarbonyl)-5-oxa-2-azaspiro[3.5]nonane-6-carboxylic acid (40d)

General procedure G was used. Yield: 11.4 g, 42%, yellow solid, mp = 122-123 °C.  $^1\text{H}$  NMR (400 MHz,  $\text{CDCl}_3$ )  $\delta$  = 4.00 (dd,  $J$  = 16.7, 9.2 Hz, 2H), 3.88 (d,  $J$  = 8.9 Hz, 1H), 3.78 (t,  $J$  = 8.2 Hz, 2H), 2.09 – 1.96 (m, 1H), 1.92 (d,  $J$  = 11.3 Hz, 2H), 1.70 – 1.32 (m, 3H), 1.44 (s, 9H) ppm.  $^{13}\text{C}$  NMR (151 MHz,  $\text{CDCl}_3$ )  $\delta$  = 173.6, 156.6, 80.2, 73.6, 72.1, 32.3, 28.5, 27.7, 19.9 ppm. LCMS (M-H) $^-$ : 270. HRMS (ESI): calc'd for:  $\text{C}_{13}\text{H}_{22}\text{NO}_5$  [M+H] $^+$  272.1498; found 272.1495.

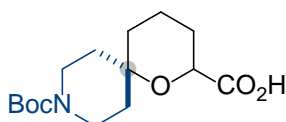

### 9-(*Tert*-butoxycarbonyl)-1-oxa-9-azaspiro[5.5]undecane-2-carboxylic acid (42d)

General procedure G was used. Yield: 17.3 g, 58%, orange solid.  $^1\text{H}$  NMR (400 MHz,  $\text{CDCl}_3$ )  $\delta$  = 8.52 (br s, 1H), 4.14 (d,  $J$  = 10.3 Hz, 1H), 3.71 (d,  $J$  = 13.2 Hz, 2H), 3.31 – 3.19 (m, 1H), 3.03 (t,  $J$  = 11.3 Hz, 1H), 2.07 (t,  $J$  = 14.8 Hz, 2H), 1.80 – 1.70 (m, 2H), 1.69 – 1.46 (m, 4H), 1.43 (s, 9H), 1.41 – 1.27 (m, 2H) ppm.  $^{13}\text{C}$  NMR (151 MHz,  $\text{CDCl}_3$ )  $\delta$  = 173.7, 155.0, 79.8, 73.0, 69.2, 39.4 (br s), 39.3 (br s), 38.9, 34.5, 29.2, 28.6, 28.4, 18.7 ppm. LCMS (M-H) $^-$ : 298. HRMS (ESI): calc'd for:  $\text{C}_{15}\text{H}_{26}\text{NO}_5$  [M+H] $^+$  300.1811; found 300.1814.

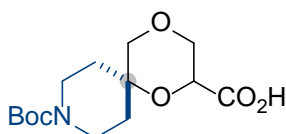

### 9-(*Tert*-butoxycarbonyl)-1,4-dioxa-9-azaspiro[5.5]undecane-2-carboxylic acid (44d)

General procedure G was used. Yield: 14.1 g, 47%, yellow solid.  $^1\text{H}$  NMR (400 MHz,  $\text{CDCl}_3$ )  $\delta$  = 8.99 (br s, 1H), 4.47 (dd,  $J$  = 10.6, 3.1 Hz, 1H), 4.10 (dd,  $J$  = 11.4, 3.2 Hz, 1H), 3.80 – 3.64 (m, 2H), 3.59 (d,  $J$  = 11.6 Hz, 1H), 3.45 (t,  $J$  = 11.1 Hz, 1H), 3.37 – 3.25 (m, 2H), 3.13 (t,  $J$  = 11.2 Hz, 1H), 2.24 (d,  $J$  = 14.1 Hz, 1H), 1.65 – 1.20 (m, 12H) ppm.  $^{13}\text{C}$  NMR (126 MHz,  $\text{CDCl}_3$ )  $\delta$  = 171.4, 155.1, 80.2, 73.6, 71.5, 67.8, 39.3 (br s), 33.6, 28.6, 28.5 ppm. LCMS ( $\text{M}-\text{H}$ ) $^-$ : 300. HRMS (ESI): calc'd for:  $\text{C}_{14}\text{H}_{24}\text{NO}_6$  [ $\text{M}+\text{H}$ ] $^+$  302.1604; found 302.1600.

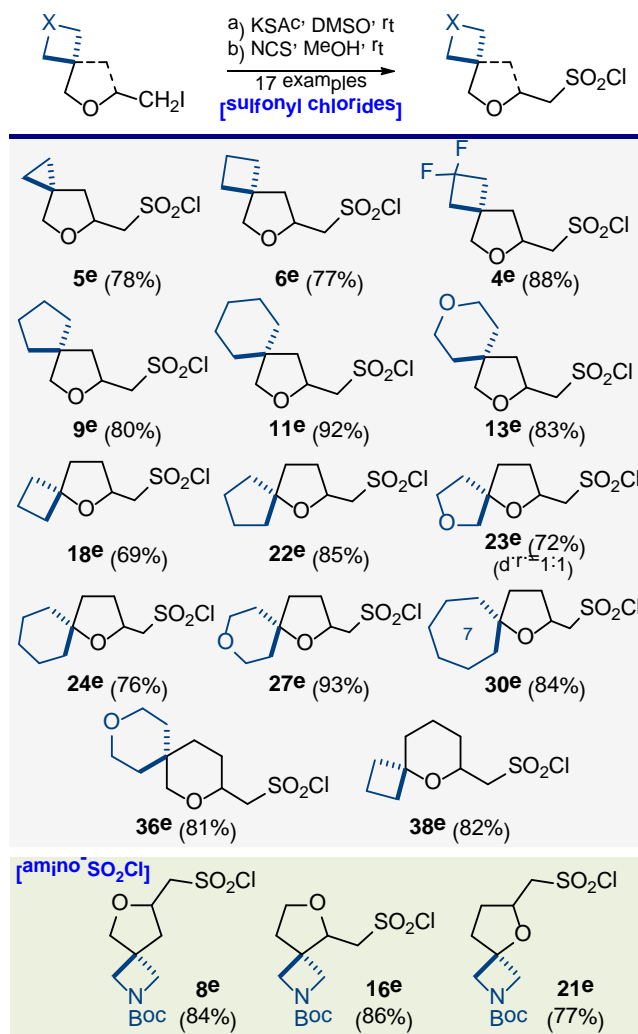

**Scheme 5.** Synthesis of oxa-spirocyclic sulfonyl chlorides **4e-6e**, **8e**, **9e**, **11e**, **13e**, **16e**, **18e**, **21e-24e**, **27e**, **30e**, **36e**, **38e**.

**General procedure H** for synthesis **4e-6e**, **8e**, **9e**, **11e**, **13e**, **16e**, **18e**, **21e-24e**, **27e**, **30e**, **36e** and **38e** (**4e** as an example. Scale: 0.1 mol for all derivatives).

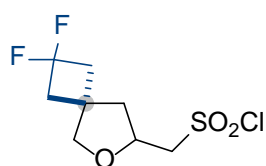

**(2,2-Difluoro-6-oxaspiro[3.4]octan-7-yl)methanesulfonyl chloride (4e)**

To a solution of **4a** (28.8 g, 0.1 mol, 1.0 equiv) in 150 mL of DMSO was added potassium thioacetate (22.8 g, 0.2 mol, 2.0 equiv). The mixture was stirred at room temperature overnight. The mixture was diluted with water (150 mL) and extracted with MTBE (5 times). The combined organic phases were washed with brine (3 times), dried over Na<sub>2</sub>SO<sub>4</sub>, filtered and concentrated under reduced pressure. The crude product was dissolved in MeCN (500 mL) and 2M HCl (50 mL), and then NCS (58.7 g, 0.44 mol, 4.4 equiv) was added in portions at 15-16 °C. The mixture was stirred for 1 h at room temperature and concentrated. The residue was dissolved in MTBE, washed with a saturated solution of NaHCO<sub>3</sub> (3 times). The organic layer was dried over Na<sub>2</sub>SO<sub>4</sub>, filtered and concentrated under reduced pressure to give the title product. Yield: 22.9 g, 88%, yellow oil. <sup>1</sup>H NMR (400 MHz, CDCl<sub>3</sub>) δ = 4.56 (p, *J* = 6.5 Hz, 1H), 4.01 (dd, *J* = 14.1, 6.6 Hz, 1H), 3.89 (q, *J* = 8.9 Hz, 2H), 3.81 (dd, *J* = 14.1, 5.4 Hz, 1H), 2.63 (q, *J* = 11.9 Hz, 4H), 2.44 (dd, *J* = 12.9, 6.5 Hz, 1H), 1.99 (dd, *J* = 12.9, 8.3 Hz, 1H) ppm. <sup>13</sup>C NMR (151 MHz, CDCl<sub>3</sub>) δ = 118.6 (t, *J* = 278.1 Hz), 78.3 (dd, *J* = 5.3, 2.2 Hz), 73.1, 69.7, 45.8 (t, *J* = 22.8 Hz), 44.1 (d, *J* = 4.1 Hz), 43.6 (t, *J* = 23.5 Hz), 35.1 (t, *J* = 10.0 Hz) ppm. <sup>19</sup>F NMR (376 MHz, CDCl<sub>3</sub>) δ = -91.7 (q, *J* = 197.1 Hz) ppm. HRMS (ESI): calc'd for: C<sub>8</sub>H<sub>12</sub>ClF<sub>2</sub>O<sub>3</sub>S [M+H]<sup>+</sup> 261.0164; found 261.0161.

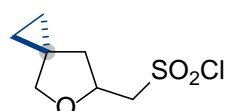

**(5-Oxaspiro[2.4]heptan-6-yl)methanesulfonyl chloride (5e)**

General procedure H was used. Yield: 16.4 g, 78%, yellow oil. <sup>1</sup>H NMR (400 MHz, CDCl<sub>3</sub>) δ = 4.83 – 4.68 (m, 1H), 4.08 (dd, *J* = 14.0, 6.5 Hz, 1H), 3.88 (dd, *J* = 14.0, 5.6 Hz, 1H), 3.78 (d, *J* = 8.1 Hz, 1H), 3.72 (d, *J* = 8.1 Hz, 1H), 2.18 (dd, *J* = 12.5, 6.6 Hz, 1H), 1.88 (dd, *J* = 12.5, 6.5 Hz, 1H), 0.87 – 0.42 (m, 4H) ppm. <sup>13</sup>C NMR (151 MHz, CDCl<sub>3</sub>) δ = 75.3, 73.9, 69.9, 40.4, 21.8, 10.7, 10.2 ppm. LCMS (RSO<sub>3</sub>H-H)<sup>-</sup>: 191. HRMS (ESI): calc'd for: C<sub>7</sub>H<sub>12</sub>ClO<sub>3</sub>S [M+H]<sup>+</sup> 211.0196; found 211.0194.

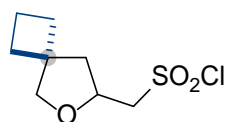

**(6-Oxaspiro[3.4]octan-7-yl)methanesulfonyl chloride (6e)**

General procedure H was used. Yield: 17.3 g, 77%, yellow oil. <sup>1</sup>H NMR (400 MHz, CDCl<sub>3</sub>) δ = 4.51 (p, *J* = 6.7 Hz, 1H), 3.97 (dd, *J* = 14.0, 6.8 Hz, 1H), 3.84 – 3.74 (m, 3H), 2.34 (dd, *J* = 12.6, 6.5 Hz, 1H), 2.14 – 1.86 (m, 6H), 1.82 (dd, *J* = 12.7, 7.9 Hz, 1H) ppm. <sup>13</sup>C NMR (126 MHz, CDCl<sub>3</sub>) δ = 143.2, 79.4, 72.9, 70.3, 45.9, 44.7, 32.6, 30.8, 16.5 ppm. HRMS (ESI): calc'd for: C<sub>8</sub>H<sub>14</sub>ClO<sub>3</sub>S [M+H]<sup>+</sup> 225.0352; found 225.0348.

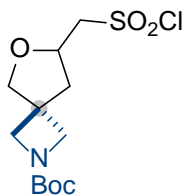

**Tert-butyl 7-((chlorosulfonyl)methyl)-6-oxa-2-azaspiro[3.4]octane-2-carboxylate (8e)**

General procedure H was used. Yield: 27.3 g, 84%, white solid, mp = 126-127 °C.  $^1\text{H}$  NMR (400 MHz,  $\text{CDCl}_3$ )  $\delta$  = 4.62 – 4.47 (m, 1H), 4.04 – 3.89 (m, 7H), 3.79 (dd,  $J$  = 14.1, 5.4 Hz, 1H), 2.52 (dd,  $J$  = 13.1, 6.5 Hz, 1H), 2.04 (dd,  $J$  = 13.0, 8.2 Hz, 1H), 1.43 (s, 9H) ppm.  $^{13}\text{C}$  NMR (126 MHz,  $\text{CDCl}_3$ )  $\delta$  = 156.2, 80.1, 77.5, 73.2, 69.6, 59.7, 57.8, 43.1, 40.5, 28.5 ppm. HRMS (ESI): calc'd for  $\text{C}_{12}\text{H}_{21}\text{ClNO}_5\text{S}$   $[\text{M}+\text{H}]^+$  326.0829; found 326.0822.

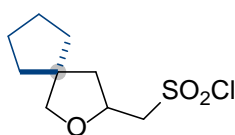

**(2-Oxaspiro[4.4]nonan-3-yl)methanesulfonyl chloride (9e)**

General procedure H was used. Yield: 19.1 g, 80%, orange oil.  $^1\text{H}$  NMR (400 MHz,  $\text{CDCl}_3$ )  $\delta$  = 4.66 – 4.55 (m, 1H), 4.02 (dd,  $J$  = 14.0, 6.8 Hz, 1H), 3.81 (dd,  $J$  = 14.0, 5.2 Hz, 1H), 3.69 (d,  $J$  = 8.2 Hz, 1H), 3.63 (d,  $J$  = 8.2 Hz, 1H), 2.18 (dd,  $J$  = 12.5, 6.6 Hz, 1H), 1.73 (dd,  $J$  = 12.5, 8.6 Hz, 1H), 1.69 – 1.46 (m, 7H) ppm.  $^{13}\text{C}$  NMR (151 MHz,  $\text{CDCl}_3$ )  $\delta$  = 79.2, 73.4, 70.5, 50.9, 44.9, 37.3, 36.2, 24.9 ppm. HRMS (ESI): calc'd for:  $\text{C}_9\text{H}_{16}\text{ClO}_3\text{S}$   $[\text{M}+\text{H}]^+$  239.0509; found 239.0514.

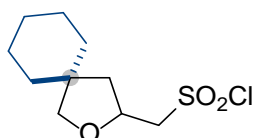

**(2-Oxaspiro[4.5]decan-3-yl)methanesulfonyl chloride (11e)**

General procedure H was used. Yield: 23.2 g, 92%, brown oil.  $^1\text{H}$  NMR (400 MHz,  $\text{CDCl}_3$ )  $\delta$  = 4.63 – 4.52 (m, 1H), 4.01 (dd,  $J$  = 14.0, 6.9 Hz, 1H), 3.80 (dd,  $J$  = 14.0, 4.9 Hz, 1H), 3.65 (s, 2H), 2.15 (dd,  $J$  = 12.7, 6.8 Hz, 1H), 1.56 – 1.36 (m, 11H) ppm.  $^{13}\text{C}$  NMR (151 MHz,  $\text{CDCl}_3$ )  $\delta$  = 78.9, 72.9, 70.6, 44.1, 36.6, 35.2, 25.9, 24.2, 23.5 ppm. HRMS (ESI): calc'd for:  $\text{C}_{10}\text{H}_{18}\text{ClO}_3\text{S}$   $[\text{M}+\text{H}]^+$  253.0665; found 253.0662.

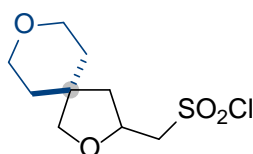

**(2,8-Dioxaspiro[4.5]decan-3-yl)methanesulfonyl chloride (13e)**

General procedure H was used. Yield: 21.1 g, 83%, beige solid.  $^1\text{H}$  NMR (400 MHz,  $\text{CDCl}_3$ )  $\delta$  = 4.66 – 4.54 (m, 1H), 4.03 (dd,  $J$  = 14.0, 6.8 Hz, 1H), 3.82 (dd,  $J$  = 14.0, 5.1 Hz, 1H), 3.77 – 3.56 (m, 6H), 2.26 (dd,  $J$  = 12.8, 6.7 Hz, 1H), 1.82 – 1.45 (m, 5H) ppm.  $^{13}\text{C}$  NMR (151 MHz,  $\text{CDCl}_3$ )  $\delta$  = 78.1, 72.8, 70.2, 65.7, 65.3, 43.7, 41.8, 36.1, 35.2 ppm. LCMS ( $\text{RSO}_3\text{H-H}$ ) $^-$ : 235. HRMS (ESI): calc'd for:  $\text{C}_9\text{H}_{16}\text{ClO}_4\text{S}$   $[\text{M}+\text{H}]^+$  255.0458; found 255.0454.

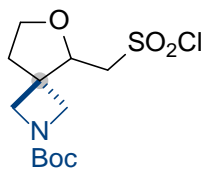

***Tert*-butyl 5-((chlorosulfonyl)methyl)-6-oxa-2-azaspiro[3.4]octane-2-carboxylate (16e)**

General procedure H was used. Yield: 27.7 g, 85%, beige solid, mp = 89-91 °C.  $^1\text{H}$  NMR (400 MHz,  $\text{CDCl}_3$ )  $\delta$  = 4.40 (dd,  $J$  = 8.8, 1.8 Hz, 1H), 4.07 – 3.86 (m, 5H), 3.83 (d,  $J$  = 8.8 Hz, 2H), 3.76 (d,  $J$  = 9.3 Hz, 1H), 2.33 – 2.10 (m, 2H), 1.44 (s, 9H) ppm.  $^{13}\text{C}$  NMR (151 MHz,  $\text{CDCl}_3$ )  $\delta$  = 156.3, 80.5, 78.2, 67.1, 66.7, 57.0, 55.3, 43.4, 37.0, 28.4 ppm. HRMS (ESI): calc'd for  $\text{C}_{12}\text{H}_{21}\text{ClNO}_5\text{S}$   $[\text{M}+\text{H}]^+$  326.0829; found 326.0832.

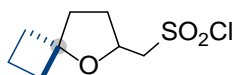

**(5-Oxaspiro[3.4]octan-6-yl)methanesulfonyl chloride (18e)**

General procedure H was used. Yield: 15.5 g, 69%, yellow oil.  $^1\text{H}$  NMR (400 MHz,  $\text{CDCl}_3$ )  $\delta$  = 4.56 (p,  $J$  = 6.4 Hz, 1H), 3.94 (dd,  $J$  = 13.9, 6.0 Hz, 1H), 3.73 (dd,  $J$  = 13.9, 6.2 Hz, 1H), 2.39 – 2.16 (m, 3H), 2.11 – 1.92 (m, 4H), 1.84 (dt,  $J$  = 14.6, 7.6 Hz, 1H), 1.77 – 1.60 (m, 1H), 1.52 (dq,  $J$  = 19.5, 9.8 Hz, 1H) ppm.  $^{13}\text{C}$  NMR (126 MHz,  $\text{CDCl}_3$ )  $\delta$  = 143.2, 84.5, 72.9, 70.7, 36.3, 36.0, 35.5, 30.9, 12.7 ppm. LCMS ( $\text{RSO}_3\text{H-H}$ ) $^-$ : 205. HRMS (ESI): calc'd for  $\text{C}_8\text{H}_{14}\text{ClO}_3\text{S}$   $[\text{M}+\text{H}]^+$  225.0352; found 225.0354.

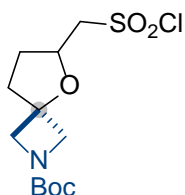

***Tert*-butyl 6-((chlorosulfonyl)methyl)-5-oxa-2-azaspiro[3.4]octane-2-carboxylate (21e)**

General procedure H was used. Yield: 25.1 g, 77%, yellow solid, mp = 85-86 °C.  $^1\text{H}$  NMR (400 MHz,  $\text{CDCl}_3$ )  $\delta$  = 4.69 – 4.55 (m, 1H), 4.14 – 4.03 (m, 2H), 4.00 (dd,  $J$  = 14.1, 6.2 Hz, 1H), 3.93 – 3.84 (m, 2H), 3.81 (dd,  $J$  = 14.1, 5.8 Hz, 1H), 2.41 – 2.28 (m, 1H), 2.28 – 2.15 (m, 2H), 1.88 (dd,  $J$  = 13.8, 6.3 Hz, 1H), 1.46 (s, 9H) ppm.  $^{13}\text{C}$  NMR (126 MHz,  $\text{CDCl}_3$ )  $\delta$  = 156.4, 79.9, 79.3, 73.9,

69.9, 62.1, 61.9, 35.5, 31.0, 28.5 ppm. HRMS (ESI): calc'd for  $C_{12}H_{21}ClNO_5S$   $[M+H]^+$  326.0829; found 326.0821.

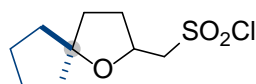

**(1-Oxaspiro[4.4]nonan-2-yl)methanesulfonyl chloride (22e)**

General procedure H was used. Yield: 20.3 g, 85%, brown oil.  $^1H$  NMR (400 MHz,  $CDCl_3$ )  $\delta$  = 4.61 – 4.48 (m, 1H), 3.98 (dd,  $J$  = 13.9, 5.6 Hz, 1H), 3.76 (dd,  $J$  = 13.9, 6.5 Hz, 1H), 2.41 – 2.17 (m, 1H), 1.99 – 1.84 (m, 3H), 1.85 – 1.66 (m, 4H), 1.68 – 1.43 (m, 4H) ppm.  $^{13}C$  NMR (151 MHz,  $CDCl_3$ )  $\delta$  = 92.9, 72.5, 70.7, 39.2, 38.3, 35.9, 32.0, 24.1, 24.1 ppm. LCMS (RSO<sub>3</sub>H-H)<sup>-</sup>: 219. HRMS (ESI): calc'd for:  $C_9H_{16}ClO_3S$   $[M+H]^+$  239.0509; found 239.0503.

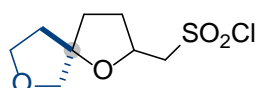

**1,7-Dioxaspiro[4.4]nonan-2-yl)methanesulfonyl chloride (23e)**

General procedure H was used. Yield: 17.3 g, 72%, black oil. Mixture of stereoisomers (d.r. = 1:1).  $^1H$  NMR (400 MHz,  $CDCl_3$ )  $\delta$  = 4.64 – 4.50 (m, 1H), 4.14 – 3.54 (m, 6H), 2.42 – 2.25 (m, 1H), 2.19 – 1.81 (m, 5H).  $^1H$  NMR (400 MHz,  $CDCl_3$ )  $\delta$  = 4.64 – 4.50 (m, 1H), 4.14 – 3.54 (m, 6H), 2.42 – 2.25 (m, 1H), 2.19 – 1.81 (m, 5H) ppm.  $^{13}C$  NMR (151 MHz,  $CDCl_3$ )  $\delta$  = 90.8, 90.7, 76.9, 73.2, 73.0, 70.1, 68.1, 68.0, 39.4, 38.7, 33.6, 33.1, 31.9, 31.8 ppm. HRMS (ESI): calc'd for:  $C_8H_{14}ClO_4S$   $[M+H]^+$  241.0301; found 241.303.

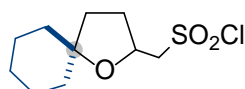

**(1-Oxaspiro[4.5]decan-2-yl)methanesulfonyl chloride (24e)**

General procedure H was used. Yield: 19.2 g, 76%, yellow oil.  $^1H$  NMR (400 MHz,  $CDCl_3$ )  $\delta$  = 4.61 – 4.51 (m, 1H), 3.99 (dd,  $J$  = 13.9, 5.8 Hz, 1H), 3.75 (dd,  $J$  = 13.9, 6.3 Hz, 1H), 2.35 – 2.23 (m, 1H), 1.94 – 1.74 (m, 3H), 1.72 – 1.61 (m, 2H), 1.61 – 1.52 (m, 2H), 1.47 (dd,  $J$  = 16.0, 7.7 Hz, 2H), 1.42 – 1.31 (m, 4H) ppm.  $^{13}C$  NMR (151 MHz,  $CDCl_3$ )  $\delta$  = 84.6, 72.3, 70.8, 38.5, 37.3, 35.9, 31.5, 25.6, 23.9, 23.7 ppm. HRMS (ESI): calc'd for:  $C_{10}H_{18}ClO_3S$   $[M+H]^+$  253.0665; found 253.0660.

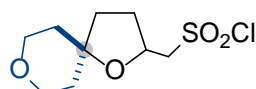

**(1,8-Dioxaspiro[4.5]decan-2-yl)methanesulfonyl chloride (27e)**

General procedure H was used. Yield: 23.7 g, 93%, yellow solid, mp = 52-53 °C.  $^1\text{H}$  NMR (400 MHz,  $\text{CDCl}_3$ )  $\delta$  = 4.57 (p,  $J$  = 6.2 Hz, 1H), 3.99 (dd,  $J$  = 14.0, 6.2 Hz, 1H), 3.86 – 3.71 (m, 3H), 3.71 – 3.58 (m, 2H), 2.35 – 2.20 (m, 1H), 1.96 – 1.78 (m, 3H), 1.77 – 1.54 (m, 4H) ppm.  $^{13}\text{C}$  NMR (151 MHz,  $\text{CDCl}_3$ )  $\delta$  = 81.3, 72.6, 70.5, 65.2, 65.2, 38.6, 37.3, 36.5, 31.1 ppm. HRMS (ESI): calc'd for:  $\text{C}_9\text{H}_{16}\text{ClO}_4\text{S}$   $[\text{M}+\text{H}]^+$  255.0458; found 255.0454.

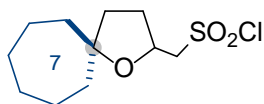

**(1-Oxaspiro[4.6]undecan-2-yl)methanesulfonyl chloride (30e)**

General procedure H was used. Yield: 22.4 g, 84%, yellow oil.  $^1\text{H}$  NMR (400 MHz,  $\text{CDCl}_3$ )  $\delta$  = 4.59 – 4.44 (m, 1H), 3.99 (dd,  $J$  = 13.9, 5.5 Hz, 1H), 3.75 (dd,  $J$  = 13.8, 6.5 Hz, 1H), 2.34 – 2.15 (m, 1H), 2.07 – 1.11 (m, 15H) ppm.  $^{13}\text{C}$  NMR (126 MHz,  $\text{CDCl}_3$ )  $\delta$  = 88.2, 72.4, 70.7, 41.6, 40.4, 37.8, 31.4, 29.3, 23.2, 22.9 ppm. LCMS ( $\text{RSO}_3\text{H-H}$ ) $^-$ : 247. HRMS (ESI): calc'd for:  $\text{C}_{11}\text{H}_{20}\text{ClO}_3\text{S}$   $[\text{M}+\text{H}]^+$  267.0822; found 267.0825.

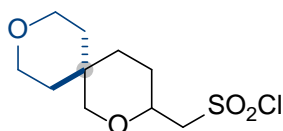

**(2,9-Dioxaspiro[5.5]undecan-3-yl)methanesulfonyl chloride (36e)**

General procedure H was used. Yield: 21.7 g, 81%, white solid, mp = 110-112 °C.  $^1\text{H}$  NMR (400 MHz,  $\text{CDCl}_3$ )  $\delta$  = 4.06 – 3.90 (m, 3H), 3.75 (dd,  $J$  = 13.6, 3.0 Hz, 1H), 3.71 – 3.60 (m, 3H), 3.59 – 3.50 (m, 1H), 3.22 (d,  $J$  = 11.7 Hz, 1H), 1.96 – 1.87 (m, 1H), 1.83 – 1.71 (m, 1H), 1.71 – 1.54 (m, 3H), 1.45 – 1.26 (m, 3H) ppm.  $^{13}\text{C}$  NMR (126 MHz,  $\text{CDCl}_3$ )  $\delta$  = 75.7, 73.2, 70.6, 63.8, 63.3, 35.8, 33.8, 31.6, 30.0, 26.6 ppm. HRMS (ESI): calc'd for:  $\text{C}_{10}\text{H}_{18}\text{ClO}_4\text{S}$   $[\text{M}+\text{H}]^+$  269.0614; found 269.0611.

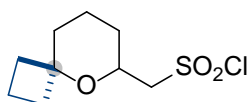

**(5-Oxaspiro[3.5]nonan-6-yl)methanesulfonyl chloride (38e)**

General procedure H was used. Yield: 19.6 g, 82%, yellow oil.  $^1\text{H}$  NMR (400 MHz,  $\text{CDCl}_3$ )  $\delta$  = 4.15 – 4.00 (m, 1H), 3.93 (dd,  $J$  = 14.1, 7.9 Hz, 1H), 3.71 (dd,  $J$  = 14.1, 3.6 Hz, 1H), 2.23 – 2.08 (m, 1H), 2.08 – 1.98 (m, 2H), 1.98 – 1.86 (m, 1H), 1.87 – 1.72 (m, 3H), 1.74 – 1.50 (m, 3H), 1.50 – 1.22 (m, 2H) ppm.  $^{13}\text{C}$  NMR (126 MHz,  $\text{CDCl}_3$ )  $\delta$  = 78.0, 71.0, 67.4, 34.7, 32.5, 30.6, 30.4, 20.0, 12.8 ppm. GCMS (M): 238. HRMS (ESI): calc'd for:  $\text{C}_9\text{H}_{16}\text{ClO}_3\text{S}$   $[\text{M}+\text{H}]^+$  239.0509; found 239.0514.

**General procedure I for synthesis 5f, 6f, 8f, 9f, 13f, 18f, 21f, 29f, 34f-36f, 40f and 44f (5f as an example. Scale: 0.1 mol for all derivatives).**

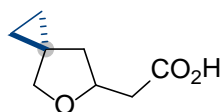

### **2-(5-Oxaspiro[2.4]heptan-6-yl)acetic acid (5f)**

To a solution of **5a** (23.8 g, 0.1 mol, 1.0 equiv) in 150 mL of DMSO was added KCN (26 g, 0.4 mol, 4.0 equiv). The mixture was stirred for 2 d at 90 °C. The mixture was diluted with water (150 mL) and extracted with MTBE (5 times). The combined organic phases were washed with brine (3 times) and dried over Na<sub>2</sub>SO<sub>4</sub>, filtered and concentrated under reduced pressure. To a solution of nitrile (13.7 g, 0.1 mol, 1 equiv) in ethanol (120 mL) was added potassium hydroxide (0.2 mol, 2.0 equiv), followed by stirring at reflux for 6 h. Then, the reaction mixture was partially concentrated, and water 100 mL was added to the residue. The mixture was partially concentrated under reduced pressure again, and then the residue was washed with CH<sub>2</sub>Cl<sub>2</sub>. Dilute hydrochloric acid was added to the aqueous layer until the acidic pH was reached. The aqueous layer was extracted with ethyl acetate and the combined organic layers were dried over Na<sub>2</sub>SO<sub>4</sub> and concentrated under reduced pressure to give the desired product. Yield: 11.4 g, 73%, yellow oil. <sup>1</sup>H NMR (400 MHz, CDCl<sub>3</sub>) δ = 9.65 (br s, 1H), 4.57 – 4.42 (m, 1H), 3.75 (d, *J* = 8.0 Hz, 1H), 3.65 (d, *J* = 8.0 Hz, 1H), 2.73 (dd, *J* = 15.6, 7.5 Hz, 1H), 2.60 (dd, *J* = 15.6, 5.7 Hz, 1H), 1.99 (dd, *J* = 12.2, 6.4 Hz, 1H), 1.71 (dd, *J* = 12.2, 7.3 Hz, 1H), 0.72 – 0.48 (m, 4H) ppm. <sup>13</sup>C NMR (151 MHz, CDCl<sub>3</sub>) δ = 176.7, 75.9, 75.1, 40.7, 40.5, 22.1, 10.9, 10.6 ppm. LCMS (M-H)<sup>-</sup>: 155. HRMS (ESI): calc'd for: C<sub>8</sub>H<sub>13</sub>O<sub>3</sub> [M+H]<sup>+</sup> 157.0865; found 157.0862.

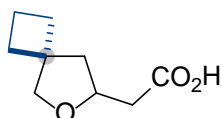

### **2-(6-Oxaspiro[3.4]octan-7-yl)acetic acid (6f)**

General procedure I was used. Yield: 11.9 g, 70%, yellow oil. <sup>1</sup>H NMR (400 MHz, CDCl<sub>3</sub>) δ = 9.55 (br s, 1H), 4.37 – 4.23 (m, 1H), 3.77 (q, *J* = 8.4 Hz, 2H), 2.61 (dd, *J* = 15.6, 7.5 Hz, 1H), 2.51 (dd, *J* = 15.6, 5.6 Hz, 1H), 2.19 (dd, *J* = 12.4, 6.3 Hz, 1H), 2.09 – 1.92 (m, 4H), 1.95 – 1.72 (m, 2H), 1.64 (dd, *J* = 12.4, 8.2 Hz, 1H) ppm. <sup>13</sup>C NMR (151 MHz, CDCl<sub>3</sub>) δ = 176.6, 79.0, 74.7, 46.1, 45.0, 41.2, 40.7, 33.0, 31.2, 16.5 ppm. HRMS (ESI): calc'd for: C<sub>9</sub>H<sub>15</sub>O<sub>3</sub> [M+H]<sup>+</sup> 171.1021; found 171.1025.



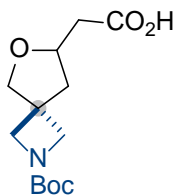

### 2-(2-(*Tert*-butoxycarbonyl)-6-oxa-2-azaspiro[3.4]octan-7-yl)acetic acid (8f)

General procedure I was used. Yield: 17.9 g, 66%, white solid, mp = 113-115 °C.  $^1\text{H}$  NMR (400 MHz,  $\text{CDCl}_3$ )  $\delta$  = 9.22 (br s, 1H), 4.35 – 4.22 (m, 1H), 3.99 – 3.81 (m, 6H), 2.62 (dd,  $J$  = 15.8, 7.3 Hz, 1H), 2.52 (dd,  $J$  = 15.7, 5.7 Hz, 1H), 2.36 (dd,  $J$  = 12.8, 6.4 Hz, 1H), 1.85 (dd,  $J$  = 12.7, 8.3 Hz, 1H), 1.42 (s, 9H) ppm.  $^{13}\text{C}$  NMR (151 MHz,  $\text{CDCl}_3$ )  $\delta$  = 175.5, 156.4, 80.1, 77.1, 75.1, 59.7, 58.5, 43.3, 40.7, 40.3, 28.5 ppm. LCMS ( $\text{M}^-$ ): 270. HRMS (ESI): calc'd for:  $\text{C}_{13}\text{H}_{22}\text{NO}_5$   $[\text{M}+\text{H}]^+$  272.1498; found 272.1496.

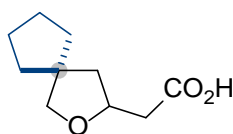

### 2-(2-Oxaspiro[4.4]nonan-3-yl)acetic acid (9f)

General procedure I was used. Yield: 12.5 g, 68%, orange oil.  $^1\text{H}$  NMR (400 MHz,  $\text{CDCl}_3$ )  $\delta$  = 9.59 (br s, 1H), 4.43 – 4.28 (m, 1H), 3.66 (d,  $J$  = 8.1 Hz, 1H), 3.58 (d,  $J$  = 8.1 Hz, 1H), 2.65 (dd,  $J$  = 15.6, 7.5 Hz, 1H), 2.54 (dd,  $J$  = 15.6, 5.5 Hz, 1H), 2.02 (dd,  $J$  = 12.3, 6.4 Hz, 1H), 1.82 – 1.30 (m, 9H) ppm.  $^{13}\text{C}$  NMR (151 MHz,  $\text{CDCl}_3$ )  $\delta$  = 176.7, 78.8, 75.2, 51.0, 45.0, 40.9, 37.5, 36.7, 24.88, 24.87 ppm. HRMS (ESI): calc'd for:  $\text{C}_{10}\text{H}_{17}\text{O}_3$   $[\text{M}+\text{H}]^+$  185.1178; found 185.1172.

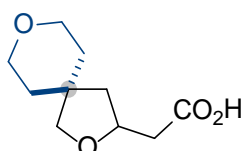

### 2-(2,8-Dioxaspiro[4.5]decan-3-yl)acetic acid (13f)

General procedure I was used. Yield: 14.4 g, 72%, yellow solid, mp = 103-104 °C.  $^1\text{H}$  NMR (400 MHz,  $\text{CDCl}_3$ )  $\delta$  = 9.91 (br s, 1H), 4.41 – 4.28 (m, 1H), 3.73 – 3.55 (m, 6H), 2.66 (dd,  $J$  = 15.7, 7.4 Hz, 1H), 2.54 (dd,  $J$  = 15.7, 5.7 Hz, 1H), 2.10 (dd,  $J$  = 12.6, 6.6 Hz, 1H), 1.67 – 1.52 (m, 4H), 1.43 (dd,  $J$  = 12.6, 8.9 Hz, 1H) ppm.  $^{13}\text{C}$  NMR (126 MHz,  $\text{CDCl}_3$ )  $\delta$  = 176.0, 77.9, 74.6, 65.8, 65.4, 43.7, 41.7, 40.7, 36.6, 35.5 ppm. HRMS (ESI): calc'd for:  $\text{C}_{10}\text{H}_{17}\text{O}_4$   $[\text{M}+\text{H}]^+$  201.1127; found 201.1122.

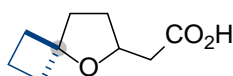

### 2-(5-Oxaspiro[3.4]octan-6-yl)acetic acid (18f)

General procedure I was used. Yield: 12.8 g, 75%, yellow oil.  $^1\text{H}$  NMR (400 MHz,  $\text{CDCl}_3$ )  $\delta$  = 9.85 (br s, 1H), 4.40 – 4.25 (m, 1H), 2.58 (dd,  $J$  = 15.5, 7.2 Hz, 1H), 2.47 (dd,  $J$  = 15.5, 6.0 Hz, 1H), 2.30 – 2.17 (m, 2H), 2.17 – 2.07 (m, 1H), 2.04 – 1.83 (m, 4H), 1.74 – 1.55 (m, 2H), 1.57 – 1.44 (m, 1H) ppm.  $^{13}\text{C}$  NMR (126 MHz,  $\text{CDCl}_3$ )  $\delta$  = 176.4, 83.8, 74.8, 41.4, 36.6, 36.4, 35.8, 30.7, 12.7 ppm. GCMS (M): 170. HRMS (ESI): calc'd for  $\text{C}_9\text{H}_{15}\text{O}_3$   $[\text{M}+\text{H}]^+$  171.1021; found 171.1024.

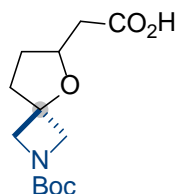

### 2-(2-(*Tert*-butoxycarbonyl)-5-oxa-2-azaspiro[3.4]octan-6-yl)acetic acid (21f)

General procedure I was used. Yield: 15.2 g, 56%, yellow solid, mp = 109–110 °C.  $^1\text{H}$  NMR (400 MHz,  $\text{CDCl}_3$ )  $\delta$  = 9.19 (br s, 1H), 4.46 – 4.29 (m, 1H), 4.01 (dd,  $J$  = 14.0, 9.2 Hz, 2H), 3.84 (dd,  $J$  = 8.6, 5.5 Hz, 2H), 2.59 (dd,  $J$  = 15.6, 7.2 Hz, 1H), 2.50 (dd,  $J$  = 15.6, 5.8 Hz, 1H), 2.20 – 2.01 (m, 3H), 1.70 – 1.53 (m, 1H), 1.41 (s, 9H) ppm.  $^{13}\text{C}$  NMR (151 MHz,  $\text{CDCl}_3$ )  $\delta$  = 175.8, 156.6, 79.9, 78.4, 77.2, 75.8, 62.5 (br s), 62.1 (br s), 40.8, 35.9, 30.9, 28.5 ppm. LCMS (M-H) $^-$ : 270. HRMS (ESI): calc'd for:  $\text{C}_{13}\text{H}_{22}\text{NO}_5$   $[\text{M}+\text{H}]^+$  272.1498; found 272.1494.

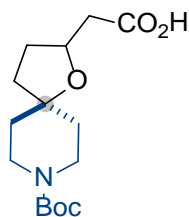

### 2-(8-(*Tert*-butoxycarbonyl)-1-oxa-8-azaspiro[4.5]decan-2-yl)acetic acid (29f)

General procedure I was used. Yield: 62%, brown oil.  $^1\text{H}$  NMR (400 MHz,  $\text{CDCl}_3$ )  $\delta$  = 4.40 – 4.28 (m, 1H), 3.59 – 3.48 (m, 2H), 3.40 – 3.27 (m, 2H), 2.62 (dd,  $J$  = 15.4, 6.9 Hz, 1H), 2.53 (dd,  $J$  = 15.3, 5.9 Hz, 1H), 2.23 – 2.07 (m, 1H), 1.80 – 1.48 (m, 7H), 1.44 (s, 9H) ppm.  $^{13}\text{C}$  NMR (151 MHz,  $\text{CDCl}_3$ )  $\delta$  = 155.0, 81.2, 79.6, 74.4, 43.3 – 40.2 (m), 37.8, 36.4, 31.1, 28.6 ppm. LCMS (M-H) $^-$ : 298. HRMS (ESI): calc'd for  $\text{C}_{15}\text{H}_{26}\text{NO}_5$   $[\text{M}+\text{H}]^+$  300.1811; found 300.1808.

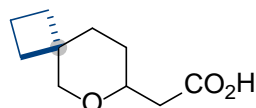

### 2-(6-Oxaspiro[3.5]nonan-7-yl)acetic acid (34f)

General procedure I was used. Yield: 14.7 g, 80%, yellow solid, mp = 47–49 °C.  $^1\text{H}$  NMR (400 MHz,  $\text{CDCl}_3$ )  $\delta$  = 9.81 (br s, 1H), 3.86 (d,  $J$  = 11.1 Hz, 1H), 3.73 – 3.60 (m, 1H), 3.26 (d,  $J$  = 11.1 Hz, 1H), 2.52 (dd,  $J$  = 15.5, 7.8 Hz, 1H), 2.43 (dd,  $J$  = 15.5, 4.9 Hz, 1H), 2.04 – 1.95 (m, 1H), 1.91 – 1.81 (m, 3H), 1.75 (dd,  $J$  = 17.1, 9.3 Hz, 1H), 1.67 – 1.50 (m, 3H), 1.50 – 1.23 (m, 2H) ppm.  $^{13}\text{C}$

NMR (126 MHz, CDCl<sub>3</sub>)  $\delta$  = 176.3, 76.4, 73.9, 41.1, 37.7, 35.4, 30.3, 29.0, 28.2, 15.4 ppm. LCMS (M-H)<sup>-</sup>: 183. HRMS (ESI): calc'd for: C<sub>10</sub>H<sub>17</sub>O<sub>3</sub> [M+H]<sup>+</sup> 185.1178; found 185.1173.

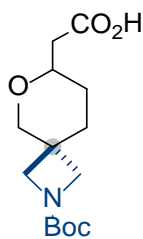

**2-(2-(*Tert*-butoxycarbonyl)-6-oxa-2-azaspiro[3.5]nonan-7-yl)acetic acid (35f)**

General procedure I was used. Yield: 19.1 g, 67%, white solid, mp = 130-131 °C. <sup>1</sup>H NMR (400 MHz, CDCl<sub>3</sub>)  $\delta$  = 9.93 (br s, 1H), 4.01 – 3.90 (m, 1H), 3.82 (d, *J* = 8.5 Hz, 1H), 3.74 – 3.64 (m, 1H), 3.62 (s, 1H), 3.48 (q, *J* = 8.8 Hz, 2H), 3.41 (d, *J* = 11.4 Hz, 1H), 2.52 (dd, *J* = 15.5, 7.8 Hz, 1H), 2.42 (dd, *J* = 15.5, 4.8 Hz, 1H), 2.00 (d, *J* = 13.3 Hz, 1H), 1.71 – 1.58 (m, 2H), 1.41 (s, 9H), 1.35-1.25 (m, 1H) ppm. <sup>13</sup>C NMR (151 MHz, cdcl<sub>3</sub>)  $\delta$  = 175.8, 156.7, 79.8, 74.4, 73.7, 58.6, 55.7, 40.9, 33.4, 32.9, 28.5, 28.2 ppm. LCMS (M-H)<sup>-</sup>: 284. HRMS (ESI): calc'd for: C<sub>14</sub>H<sub>24</sub>NO<sub>5</sub> [M+H]<sup>+</sup> 286.1654; found 286.1658.

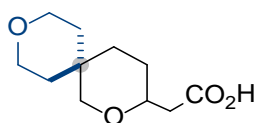

**2-(2,9-Dioxaspiro[5.5]undecan-3-yl)acetic acid (36f)**

General procedure I was used. Yield: 74%, white solid, mp = 116-118 °C. <sup>1</sup>H NMR (400 MHz, CDCl<sub>3</sub>)  $\delta$  = 10.34 (br s, 1H), 3.93 – 3.86 (m, 1H), 3.75 – 3.61 (m, 4H), 3.61 – 3.48 (m, 1H), 3.17 (d, *J* = 11.5 Hz, 1H), 2.55 (dd, *J* = 15.4, 7.8 Hz, 1H), 2.46 (dd, *J* = 15.5, 4.8 Hz, 1H), 1.91 – 1.81 (m, 1H), 1.81 – 1.70 (m, 1H), 1.67 – 1.44 (m, 3H), 1.39 – 1.21 (m, 3H) ppm. <sup>13</sup>C NMR (126 MHz, CDCl<sub>3</sub>)  $\delta$  = 175.9, 75.7, 74.8, 63.9, 63.3, 41.0, 35.9, 34.0, 31.6, 30.1, 26.9 ppm. LCMS (M+H)<sup>+</sup>: 215. HRMS (ESI): calc'd for C<sub>11</sub>H<sub>19</sub>O<sub>4</sub> [M+H]<sup>+</sup> 215.1283; found 215.1280.

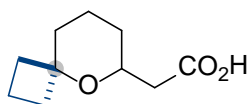

**2-(5-Oxaspiro[3.5]nonan-6-yl)acetic acid (38f)**

General procedure I was used. Yield: 15.4 g, 84%, yellow oil. <sup>1</sup>H NMR (400 MHz, CDCl<sub>3</sub>)  $\delta$  = 10.78 (br s, 1H), 3.84 – 3.71 (m, 1H), 2.54 (dd, *J* = 15.6, 8.0 Hz, 1H), 2.46 (dd, *J* = 15.6, 5.0 Hz, 1H), 2.11 (dd, *J* = 21.0, 10.2 Hz, 1H), 2.06 – 1.95 (m, 2H), 1.95 – 1.84 (m, 1H), 1.83 – 1.68 (m, 3H), 1.66 – 1.50 (m, 3H), 1.48 – 1.34 (m, 1H), 1.25 (qd, *J* = 13.1, 4.0 Hz, 1H) ppm. <sup>13</sup>C NMR (151

MHz, CDCl<sub>3</sub>)  $\delta$  = 176.0, 77.7, 68.6, 41.3, 35.0, 33.0, 30.9, 30.8, 20.1, 20.0, 12.8 ppm. GCMS (M):184. HRMS (ESI): calc'd for: C<sub>10</sub>H<sub>17</sub>O<sub>3</sub> [M+H]<sup>+</sup> 185.1178; found 185.1172.

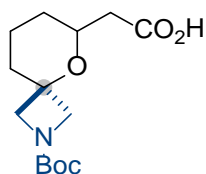

**2-(2-(*Tert*-butoxycarbonyl)-5-oxa-2-azaspiro[3.5]nonan-6-yl)acetic acid (40f)**

General procedure I was used. Yield: 19.9 g, 70%, beige solid, mp = 169-170 °C. <sup>1</sup>H NMR (400 MHz, CDCl<sub>3</sub>)  $\delta$  = 3.92 – 3.64 (m, 5H), 2.56 (dd, *J* = 15.7, 7.6 Hz, 1H), 2.46 (dd, *J* = 15.6, 4.8 Hz, 1H), 1.92 – 1.72 (m, 2H), 1.58 (dt, *J* = 21.2, 11.8 Hz, 3H), 1.43 (s, 9H), 1.34 – 1.17 (m, 1H) ppm. <sup>13</sup>C NMR (151 MHz, CDCl<sub>3</sub>)  $\delta$  = 175.5, 156.7, 79.9, 72.9, 70.2, 41.1, 32.6, 30.2, 28.5, 20.1 ppm. LCMS (M-H)<sup>-</sup>: 284. HRMS (ESI): calc'd for: C<sub>14</sub>H<sub>24</sub>NO<sub>5</sub> [M+H]<sup>+</sup> 286.1654; found 286.1651.

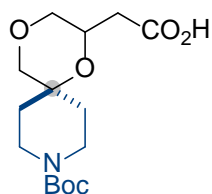

**2-(9-(*tert*-butoxycarbonyl)-1,4-dioxo-9-azaspiro[5.5]undecan-2-yl)acetic acid (44f)**

General procedure I was used. Yield: 21.7 g, 69%, yellow oil. <sup>1</sup>H NMR (400 MHz, CDCl<sub>3</sub>)  $\delta$  = 8.59 (br s, 1H), 4.29 – 4.17 (m, 1H), 3.87 – 3.71 (m, 3H), 3.52 (d, *J* = 11.4 Hz, 1H), 3.24 (d, *J* = 11.4 Hz, 1H), 3.21 – 3.10 (m, 2H), 3.08 – 2.99 (m, 1H), 2.48 – 2.31 (m, 3H), 1.43 (s, 9H), 1.42 – 1.31 (m, 3H) ppm. <sup>13</sup>C NMR (126 MHz, CDCl<sub>3</sub>)  $\delta$  = 174.8, 155.1, 79.8, 74.2, 70.7, 70.2, 64.9, 39.3, 38.6, 37.1, 33.9, 28.8, 28.6 ppm. HRMS (ESI): calc'd for: C<sub>15</sub>H<sub>26</sub>NO<sub>6</sub> [M+H]<sup>+</sup> 316.1760; found 316.1763.

**General procedure J for synthesis 8g and 35g (8g as an example. Scale: 0.1 mol for all derivatives).**

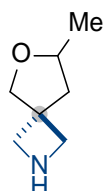

**7-Methyl-6-oxa-2-azaspiro[3.4]octane hydrochloride (8g)**

To a solution of **8a** (35.3 g, 0.1 mol, 1.0 equiv) in 150 mL of MeOH was added and Pd/C (5%), (3 g). The mixture was stirred under H<sub>2</sub>-ballon at room temperature overnight. After consumption of

all starting material, Pd/C was filtered out, and the reaction mixture was concentrated under reduced pressure. The residue was dissolved in cold EtOAc and 5M HCl in dioxane was added dropwise to achieve a slightly acidic pH. The precipitate was filtered and dried. Yield: 14.4 g, 88%, white solid, mp = 113-114 °C.  $^1\text{H}$  NMR (400 MHz, DMSO- $d_6$ )  $\delta$  = 9.50 (br s, 2H), 3.95 (d,  $J$  = 9.2 Hz, 1H), 3.93-3.80 (m, 5H), 3.72 (d,  $J$  = 9.3 Hz, 1H), 2.35 (dd,  $J$  = 12.8, 6.2 Hz, 1H), 1.66 (dd,  $J$  = 12.8, 8.3 Hz, 1H), 1.11 (d,  $J$  = 6.1 Hz, 3H) ppm.  $^{13}\text{C}$  NMR (151 MHz, DMSO- $d_6$ )  $\delta$  = 75.3, 74.3, 54.5, 54.2, 44.3, 43.6, 20.7 ppm. LCMS ( $\text{M}+\text{H}$ ) $^+$ : 128. HRMS (ESI): calc'd for  $\text{C}_7\text{H}_{14}\text{NO}$  [ $\text{M}+\text{H}$ ] $^+$  128.1075; found 128.1072.

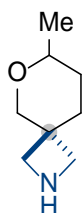

### 7-Methyl-6-oxa-2-azaspiro[3.5]nonane hydrochloride (35g)

General procedure J was used. Yield: 15.1 g, 85%, yellow solid, mp = 163-165 °C.  $^1\text{H}$  NMR (400 MHz, DMSO- $d_6$ )  $\delta$  = 9.47 (br s, 2H), 4.07 (dd,  $J$  = 11.3, 2.1 Hz, 1H), 3.70 (t,  $J$  = 6.2 Hz, 2H), 3.59 – 3.43 (m, 2H), 3.28 (d,  $J$  = 11.3 Hz, 1H), 2.13 – 1.97 (m, 1H), 1.63 – 1.47 (m, 2H), 1.18 – 1.05 (m, 1H), 1.03 (d,  $J$  = 6.1 Hz, 3H) ppm.  $^{13}\text{C}$  NMR (126 MHz, DMSO- $d_6$ )  $\delta$  = 72.4, 72.0, 53.6, 51.0, 35.8, 31.8, 29.4, 21.3 ppm. LCMS ( $\text{M}+\text{H}$ ) $^+$ : 142. HRMS (ESI): calc'd for:  $\text{C}_8\text{H}_{16}\text{NO}$  [ $\text{M}+\text{H}$ ] $^+$  142.1232; found 142.1235.

**General procedure K for synthesis 45g-48g (45h as an example. Scale: 0.1 mol for all derivatives).**

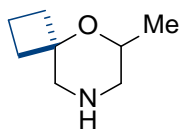

### 6-Methyl-5-oxa-8-azaspiro[3.5]nonane (45g)

To a solution of **45a** (35.7 g, 0.1 mol, 1.0 equiv) in 200 mL of dry  $\text{CH}_3\text{OH}$  was added  $\text{Et}_3\text{N}$  (15.3 mL, 0.11 mol, 1.1 equiv) and 10% Pd/C (3.5 g). The mixture was stirred under a 25 L rubber ball filled with  $\text{H}_2$  for 24 h at room temperature. The mixture was concentrated under reduced pressure. The resulting residue was dissolved in 100 mL of MTBE and filtered through a pad of  $\text{SiO}_2$ . The filtrate was washed with a 1M solution of  $\text{AgNO}_3$ , filtered through  $\text{SiO}_2$  and  $\text{Na}_2\text{SO}_4$  and concentrated under reduced pressure. The residue was dissolved in 150 mL of dry MeOH and 3 g of 10% Pd/C was added to the mixture. The mixture was hydrogenated in autoclave at 50 atm, 8 h at 60 °C and concentrated under reduced pressure to give the desired product. Yield: 12 g, 85%,

colorless oil.  $^1\text{H}$  NMR (400 MHz,  $\text{CDCl}_3$ )  $\delta$  = 3.58 – 3.43 (m, 1H), 2.87 (d,  $J$  = 12.4 Hz, 1H), 2.73 (dd,  $J$  = 12.5, 1.3 Hz, 1H), 2.58 (dd,  $J$  = 12.4, 1.9 Hz, 1H), 2.38 (dd,  $J$  = 12.3, 10.5 Hz, 1H), 2.18 – 2.08 (m, 1H), 2.06 – 1.89 (m, 2H), 1.86 – 1.73 (m, 2H), 1.72 (br s, 1H), 1.60 – 1.43 (m, 1H), 1.04 (d,  $J$  = 6.3 Hz, 3H) ppm.  $^{13}\text{C}$  NMR (126 MHz,  $\text{CDCl}_3$ )  $\delta$  = 75.6, 67.6, 52.2, 32.6, 30.5, 19.1, 12.9 ppm. GCMS (M): 141. HRMS (ESI): calc'd for  $\text{C}_8\text{H}_{16}\text{NO}$   $[\text{M}+\text{H}]^+$  142.1232; found 142.1227.

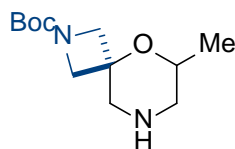

***Tert*-butyl 6-methyl-5-oxa-2,8-diazaspiro[3.5]nonane-2-carboxylate (46g)**

General procedure K was used. Yield: 16.5 g, 68%, grey solid.  $^1\text{H}$  NMR (400 MHz,  $\text{DMSO-d}_6$ )  $\delta$  = 3.78 (d,  $J$  = 7.6 Hz, 1H), 3.70 (d,  $J$  = 7.6 Hz, 1H), 3.58 (d,  $J$  = 8.7 Hz, 1H), 3.50 (d,  $J$  = 8.9 Hz, 1H), 3.49 – 3.42 (m, 1H), 3.02 (br s, 1H), 2.87 (d,  $J$  = 12.4 Hz, 1H), 2.67 (dd,  $J$  = 12.2, 1.7 Hz, 1H), 2.19 (dd,  $J$  = 12.1, 10.4 Hz, 1H), 1.38 (s, 9H), 1.00 (d,  $J$  = 6.2 Hz, 3H) ppm.  $^{13}\text{C}$  NMR (151 MHz,  $\text{DMSO-d}_6$ )  $\delta$  = 155.7, 78.6, 70.8, 68.4, 58.7 (br s), 57.7 (br s), 51.1, 51.0, 28.0, 18.7 ppm. LCMS  $(\text{M}+\text{H})^+$ : 243. HRMS (ESI): calc'd for  $\text{C}_{12}\text{H}_{23}\text{N}_2\text{O}_3$   $[\text{M}+\text{H}]^+$  243.1709; found 243.1714.

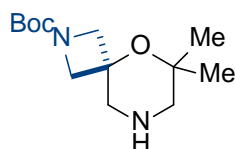

***Tert*-butyl 6,6-dimethyl-5-oxa-2,8-diazaspiro[3.5]nonane-2-carboxylate (47g)**

General procedure K was used. Yield: 18.7 g, 73%, yellow oil.  $^1\text{H}$  NMR (400 MHz,  $\text{CDCl}_3$ )  $\delta$  = 3.82 (d,  $J$  = 9.0 Hz, 2H), 3.75 (d,  $J$  = 9.2 Hz, 2H), 2.93 (s, 2H), 2.63 (s, 2H), 1.82 (s, 1H), 1.43 (s, 9H), 1.18 (s, 6H) ppm.  $^{13}\text{C}$  NMR (126 MHz,  $\text{CDCl}_3$ )  $\delta$  = 156.8, 79.7, 72.5, 68.8, 60.9 (br s), 55.3, 53.0, 28.5, 26.2 ppm. HRMS (ESI): calc'd for  $\text{C}_{13}\text{H}_{25}\text{N}_2\text{O}_3$   $[\text{M}+\text{H}]^+$  257.1865; found 257.1862.

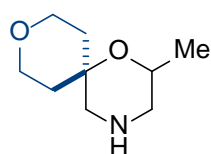

**2-Methyl-1,9-dioxa-4-azaspiro[5.5]undecane (48g)**

General procedure K was used. Yield: 13.8 g, 81%, colorless oil.  $^1\text{H}$  NMR (400 MHz,  $\text{CDCl}_3$ )  $\delta$  = 3.80 (td,  $J$  = 10.8, 3.1 Hz, 1H), 3.76 – 3.68 (m, 1H), 3.68 – 3.56 (m, 3H), 2.83 (dd,  $J$  = 12.1, 2.4 Hz, 1H), 2.74 (d,  $J$  = 12.2 Hz, 1H), 2.52 (d,  $J$  = 12.2 Hz, 1H), 2.39 – 2.32 (m, 1H), 2.21 (dd,  $J$  = 14.0, 2.4 Hz, 1H), 1.63 (br s, 1H), 1.61 – 1.48 (m, 2H), 1.49 – 1.38 (m, 1H), 1.05 (d,  $J$  = 6.2 Hz, 3H)

ppm.  $^{13}\text{C}$  NMR (126 MHz,  $\text{CDCl}_3$ )  $\delta$  = 69.2, 65.3, 63.8, 63.3, 54.6, 53.1, 37.5, 30.2, 19.5 ppm. GCMS (M): 171. HRMS (ESI): calc'd for  $\text{C}_9\text{H}_{18}\text{NO}_2$   $[\text{M}+\text{H}]^+$  172.1338; found 172.1332.

**General procedure L for synthesis 6h, 18h and 36h (6h as an example. Scale: 0.1 mol for all derivatives).**

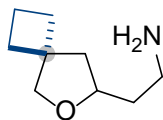

**2-(6-Oxaspiro[3.4]octan-7-yl)ethan-1-amine hydrochloride (6h)**

To a solution of **6a** (25.2 g, 0.1 mol, 1.0 equiv) in 150 mL of DMSO was added KCN (26 g, 0.4 mol, 4.0 equiv). The mixture was stirred for 2 d at 90 °C. The mixture was diluted with water (150 mL) and extracted with MTBE (5 times). The combined organic phases were washed with brine (3 times) and dried over  $\text{Na}_2\text{SO}_4$ , filtered and concentrated under reduced pressure. The resulting nitrile was dissolved in 500 mL of  $\text{MeOH-NH}_3$  (17%) and reduced in autoclave with Raney nickel at 50 atm, 8 h. The mixture was filtered and concentrated under reduced pressure. Yield: 12.1 g, 78%, white solid, mp = 89-90 °C.  $^1\text{H}$  NMR (400 MHz,  $\text{DMSO-d}_6$ )  $\delta$  = 8.15 (s, 3H), 3.90 – 3.77 (m, 1H), 3.70 – 3.60 (m, 1H), 3.58 (d,  $J$  = 8.3 Hz, 1H), 2.77 (br s, 2H), 2.09 (dd,  $J$  = 12.2, 6.3 Hz, 1H), 2.03 – 1.87 (m, 4H), 1.87 – 1.64 (m, 4H), 1.51 (dd,  $J$  = 12.2, 8.2 Hz, 1H) ppm.  $^{13}\text{C}$  NMR (126 MHz,  $\text{DMSO-d}_6$ )  $\delta$  = 77.9, 75.5, 45.5, 44.5, 36.4, 33.0, 32.3, 30.9, 15.9 ppm. LCMS ( $\text{M}+\text{H}$ ) $^+$ : 156. HRMS (ESI): calc'd for  $\text{C}_9\text{H}_{18}\text{NO}$   $[\text{M}+\text{H}]^+$  156.1388; found 156.1390.

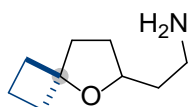

**2-(5-Oxaspiro[3.4]octan-6-yl)ethan-1-amine (18h)**

General procedure L was used. Yield: 12.4 g, 80%, colorless oil.  $^1\text{H}$  NMR (400 MHz,  $\text{CDCl}_3$ )  $\delta$  = 4.02 – 3.83 (m, 1H), 2.83 – 2.69 (m, 2H), 2.23 – 2.09 (m, 2H), 2.01 – 1.78 (m, 5H), 1.67 – 1.42 (m, 7H) ppm.  $^{13}\text{C}$  NMR (151 MHz,  $\text{CDCl}_3$ )  $\delta$  = 83.0, 77.3, 40.4, 39.7, 36.7, 36.6, 36.0, 31.1, 12.7 ppm. GCMS (M): 155. HRMS (ESI): calc'd for  $\text{C}_9\text{H}_{18}\text{NO}$   $[\text{M}+\text{H}]^+$  156.1388; found 156.1383.

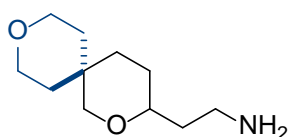

**2-(2,9-Dioxaspiro[5.5]undecan-3-yl)ethan-1-amine (36h)**

General procedure L was used. Yield: 14.3 g, 72%, colorless oil.  $^1\text{H}$  NMR (400 MHz,  $\text{CDCl}_3$ )  $\delta$  = 3.84 (dd,  $J$  = 11.4, 2.7 Hz, 1H), 3.64 (t,  $J$  = 5.6 Hz, 2H), 3.62 – 3.58 (m, 1H), 3.57 – 3.49 (m, 1H),

3.40 – 3.23 (m, 1H), 3.09 (d,  $J = 11.4$  Hz, 1H), 2.84 – 2.70 (m, 2H), 1.89 – 1.68 (m, 2H), 1.69 – 1.49 (m, 3H), 1.50 – 1.38 (m, 2H), 1.30 (br s, 2H), 1.29 – 1.21 (m, 3H) ppm.  $^{13}\text{C}$  NMR (126 MHz,  $\text{CDCl}_3$ )  $\delta = 76.9, 75.7, 64.0, 63.4, 40.0, 39.0, 36.1, 34.3, 31.8, 30.3, 27.5$  ppm. HRMS (ESI): calc'd for  $\text{C}_{11}\text{H}_{22}\text{NO}_2$   $[\text{M}+\text{H}]^+$  200.1651; found 200.1657.

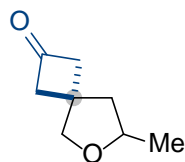

### 7-Methyl-6-oxaspiro[3.4]octan-2-one (7i)

To a solution of **7a** (31.2 g, 0.1 mol, 1.0 equiv) in 150 mL of MeOH was added and Pd/C (5%), (3 g). The mixture was stirred under  $\text{H}_2$ -ballon at room temperature overnight. After consumption of all starting material, Pd/C was filtered out, and the reaction mixture was concentrated under reduced pressure. The residue was dissolved in THF (200 mL) and a solution of 2.0 M aqueous solution of HCl (400 mL) was added dropwise at 0 °C, and the resulting mixture was stirred at room temperature overnight. Then the reaction mixture was extracted with  $\text{CH}_2\text{Cl}_2$  (3 times). The combined organic phase was washed with a saturated aqueous solution of  $\text{NaHCO}_3$ , brine, dried over  $\text{Na}_2\text{SO}_4$ , concentrated, and the residue was purified by column chromatography (hexane/EtOAc, 8:2). Yield: 8.8 g, 63%, yellow oil.  $^1\text{H}$  NMR (400 MHz,  $\text{CDCl}_3$ )  $\delta = 4.23 - 4.06$  (m, 1H), 3.96 (d,  $J = 8.6$  Hz, 1H), 3.84 (d,  $J = 8.6$  Hz, 1H), 3.19 – 2.95 (m, 4H), 2.23 (dd,  $J = 12.4, 6.3$  Hz, 1H), 1.79 (dd,  $J = 12.4, 8.3$  Hz, 1H), 1.27 (d,  $J = 6.1$  Hz, 3H) ppm.  $^{13}\text{C}$  NMR (126 MHz,  $\text{CDCl}_3$ )  $\delta = 206.2, 78.2, 75.8, 57.4, 56.1, 46.6, 36.6, 21.3$  ppm. GCMS (M): 140. HRMS (ESI): calc'd for  $\text{C}_8\text{H}_{13}\text{O}_2$   $[\text{M}+\text{H}]^+$  141.0916; found 141.0919.

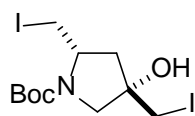

### Tert-butyl-4-hydroxy-2,4-bis(iodomethyl)pyrrolidine-1-carboxylate (50)

General procedure A was used. Scale 0.01 mol. Yield: 4.3 g, 92%, brown oil.  $^1\text{H}$  NMR (600 MHz,  $\text{DMSO-d}_6$ )  $\delta = 5.37$  (s, 1H), 4.00 – 3.82 (m, 1H), 3.65 – 3.34 (m, 6H), 2.19 – 2.06 (m, 1H), 2.06 – 1.79 (m, 1H), 1.38 (s, 9H) ppm.  $^{13}\text{C}$  NMR (151 MHz,  $\text{DMSO-d}_6$ )  $\delta = 153.6, 153.1, 79.2, 76.1, 75.4, 59.1, 59.0, 58.4, 58.2, 41.8, 41.1, 28.1, 28.0, 18.0, 17.8, 11.6, 11.0$  ppm. HRMS (ESI): calc'd for  $\text{C}_{11}\text{H}_{20}\text{I}_2\text{NO}_3$   $[\text{M}+\text{H}]^+$  467.9533; found 467.9538.

### General procedure M



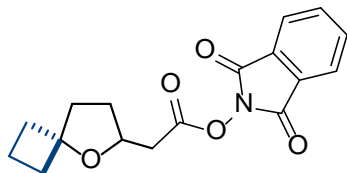

### 1,3-Dioxoisindolin-2-yl 2-((5-oxaspiro[3.4]octan-6-yl)oxy)acetate

To a solution of **18f** (5.00 g, 0.02937 mol, 1.0 equiv) in  $\text{CH}_2\text{Cl}_2$  (60 mL) was added *N*-hydroxyphthalimide (4.79 g, 0.02937 mol, 1.0 equiv), DMAP (0.36 g, 0.00293 mol, 0.1 equiv). To the solution was added DIC (4.55 mL, 0.02937 mol, 1.0 equiv) dropwise at room temperature. The mixture was stirred at room temperature overnight. The mixture was filtered. The filtrate was washed with water (1  $\times$  60 mL), a sat. aq. solution of  $\text{Na}_2\text{CO}_3$  (2  $\times$  80 mL), 1M HCl (2  $\times$  80 mL), brine (1  $\times$  60 mL), dried over  $\text{Na}_2\text{SO}_4$ , filtered and concentrated under reduced pressure. Yield: 11.96 g, 89%, 70% purity.  $^1\text{H}$  NMR (500 MHz,  $\text{CDCl}_3$ )  $\delta$  = 7.79 (dd,  $J$  = 5.2, 3.1 Hz, 2H), 7.71 (dd,  $J$  = 5.3, 3.1 Hz, 2H), 4.34 (p,  $J$  = 6.7 Hz, 1H), 2.89 (dd,  $J$  = 15.3, 5.9 Hz, 1H), 2.69 (dd,  $J$  = 15.3, 7.3 Hz, 1H), 2.23 – 2.13 (m, 3H), 2.00 – 1.95 (m, 1H), 1.94 – 1.89 (m, 3H), 1.75 – 1.66 (m, 1H), 1.66 – 1.58 (m, 1H), 1.48 – 1.37 (m, 1H) ppm.

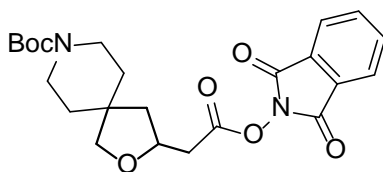

### Tert-butyl 3-(2-(((1,3-dioxoisindolin-2-yl)oxy)-2-oxoethyl)-2-oxa-8-azaspiro[4.5]decane-8-carboxylate

General procedure M was used. Yield: 9.36 g, 88%, 70% purity.  $^1\text{H}$  NMR (500 MHz,  $\text{CDCl}_3$ )  $\delta$  = 7.83 – 7.80 (m, 2H), 7.76 – 7.74 (m, 2H), 4.40 (p,  $J$  = 6.5 Hz, 1H), 3.63 (dd,  $J$  = 32.9, 8.6 Hz, 2H), 3.42 – 3.30 (m, 4H), 2.96 (dd,  $J$  = 15.4, 6.2 Hz, 1H), 2.82 (dd,  $J$  = 15.4, 6.5 Hz, 1H), 1.55 – 1.50 (m, 6H), 1.41 (s, 9H) ppm.

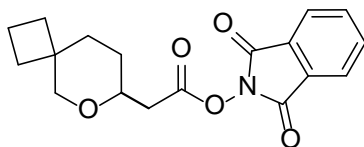

### 1,3-Dioxoisindolin-2-yl 2-((6-oxaspiro[3.5]nonan-7-yl)oxy)acetate

General procedure M was used. Yield: 3.61 g, 81%, 83% purity.  $^1\text{H}$  NMR (500 MHz,  $\text{CDCl}_3$ )  $\delta$  = 7.86 – 7.79 (m, 2H), 7.78 – 7.70 (m, 2H), 3.85 (dd,  $J$  = 11.2, 2.2 Hz, 1H), 3.79 – 3.66 (m, 1H), 2.83 (dd,  $J$  = 15.2, 7.0 Hz, 1H), 2.70 (dd,  $J$  = 15.2, 5.9 Hz, 1H), 2.06 – 1.93 (m, 1H), 1.90 – 1.35 (m, 10H) ppm.

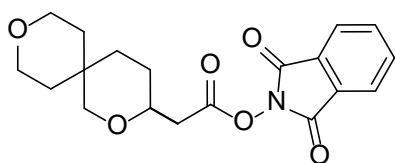

### 1,3-Dioxoisindolin-2-yl 2-((2,9-dioxaspiro[5.5]undecan-3-yl)oxy)acetate

General procedure M was used. Yield: 5.20 g, 79%, 97% purity.  $^1\text{H}$  NMR (400 MHz,  $\text{CDCl}_3$ )  $\delta$  = 7.81 (dd,  $J$  = 5.4, 3.1 Hz, 2H), 7.72 (dd,  $J$  = 5.3, 3.2 Hz, 2H), 3.89 (dd,  $J$  = 11.5, 2.2 Hz, 1H), 3.80 – 3.67 (m, 1H), 3.68 – 3.40 (m, 4H), 3.15 (d,  $J$  = 11.5 Hz, 1H), 2.84 (dd,  $J$  = 15.2, 7.0 Hz, 1H), 2.72 (dd,  $J$  = 15.2, 5.7 Hz, 1H), 1.93 – 1.67 (m, 2H), 1.67 – 1.50 (m, 3H), 1.39 – 1.14 (m, 3H) ppm.  $^{13}\text{C}$  NMR (126 MHz,  $\text{CDCl}_3$ )  $\delta$  = 167.1, 161.8, 134.8, 128.9, 123.9, 75.6, 74.3, 63.8, 63.2, 38.0, 35.8, 33.9, 31.6, 30.0, 26.6 ppm. HRMS (ESI): calc'd for  $\text{C}_{19}\text{H}_{22}\text{NO}_6$   $[\text{M}+\text{H}]^+$  360.1447; found 360.1440.

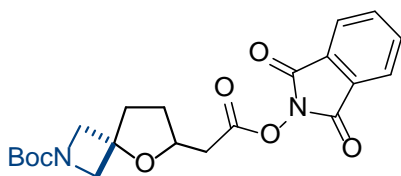

### Tert-butyl 6-(2-(((1,3-dioxoisindolin-2-yl)oxy)-2-oxoethyl)-5-oxa-2-azaspiro[3.4]octane-2-carboxylate

General procedure M was used. Yield: 3.22 g, 71%, 90% purity.  $^1\text{H}$  NMR (500 MHz,  $\text{CDCl}_3$ )  $\delta$  = 7.84 (dd,  $J$  = 5.4, 3.1 Hz, 2H), 7.75 (dd,  $J$  = 5.4, 3.1 Hz, 2H), 4.47 – 4.34 (m, 1H), 4.01 (d,  $J$  = 8.9 Hz, 2H), 3.83 (dd,  $J$  = 19.4, 9.1 Hz, 2H), 2.93 (dd,  $J$  = 15.5, 5.9 Hz, 1H), 2.79 (dd,  $J$  = 15.5, 6.8 Hz, 1H), 2.24 – 2.03 (m, 3H), 1.84 – 1.72 (m, 1H), 1.39 (s, 9H) ppm.  $^{13}\text{C}$  NMR (126 MHz,  $\text{CDCl}_3$ )  $\delta$  = 166.7, 161.8, 156.4, 134.9, 128.9, 124.0, 79.6, 78.6, 75.3, 62.3, 62.0, 37.5, 35.8, 30.5, 28.4 ppm. HRMS (ESI): calc'd for  $\text{C}_{21}\text{H}_{25}\text{N}_2\text{O}_7$   $[\text{M}+\text{H}]^+$  417.1662; found 417.1660.

### General procedure N for synthesis of 14j, 18j, 34j, 36j and 21j (18j as an example)

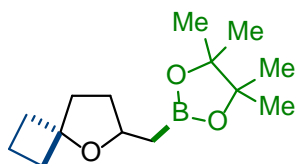

### 2-(((5-Oxaspiro[3.4]octan-6-yl)methyl)-4,4,5,5-tetramethyl-1,3,2-dioxaborolane (18j)

A Schlenk flask was charged with **18f**-NHPI (1.0 g, 0.003171 mol, 1.0 equiv), bis(pinacolato)diboron (2.42 g, 0.0095 mol, 3.0 equiv), ground  $\text{LiOH}\cdot\text{H}_2\text{O}$  (2.0 g, 0.0476 mol, 15.0 equiv),  $\text{Cu}(\text{acac})_2$  (30 mol%, 0.25 g, 0.00095 mol),  $\text{MgBr}_2\cdot\text{Et}_2\text{O}$  (1.22 g, 0.00476 mol, 1.5 equiv) under argon. A degassed mixture of dioxane and DMF (1:4, 23 mL) was added to the mixture. The

mixture was stirred at room temperature until the color of the reaction mixture became dark brown (see photos, 10-20 min). The mixture was diluted with MTBE (150 mL), and air was bubbled through the solution (5 min). The mixture was diluted with a sat. aq. solution of  $\text{NH}_4\text{Cl}$  (200 mL), and the organic layer was separated. The organic layer was washed with a 10% aq. solution of  $\text{K}_2\text{CO}_3$  ( $2 \times 150$  mL), brine ( $1 \times 150$  mL), dried over  $\text{Na}_2\text{SO}_4$ , filtered and concentrated under reduced pressure. The final product was purified by column chromatography (hexane/EtOAc, 100:0 to 50:50). Before chromatography the silica gel in the column was washed with a mixture of hexane/ $\text{Et}_3\text{N}$  (98:2, 400 mL) and 200 mL of pure hexane. Yield: 0.47 g, 58%.  $^1\text{H}$  NMR (400 MHz,  $\text{CDCl}_3$ )  $\delta$  = 4.17 – 4.00 (m, 1H), 2.23 – 2.12 (m, 2H), 2.06 – 1.85 (m, 5H), 1.67 – 1.56 (m, 1H), 1.52 – 1.38 (m, 2H), 1.21 (s, 12H), 1.08 – 0.78 (m, 2H) ppm.  $^{13}\text{C}$  NMR (126 MHz,  $\text{CDCl}_3$ )  $\delta$  = 83.2, 82.7, 76.1, 37.2, 36.8, 36.3, 32.7, 25.0, 24.8, 12.8 ppm. HRMS (ESI): calc'd for  $\text{C}_{14}\text{H}_{26}\text{BO}_3$   $[\text{M}+\text{H}]^+$  253.1975; found 253.1971.

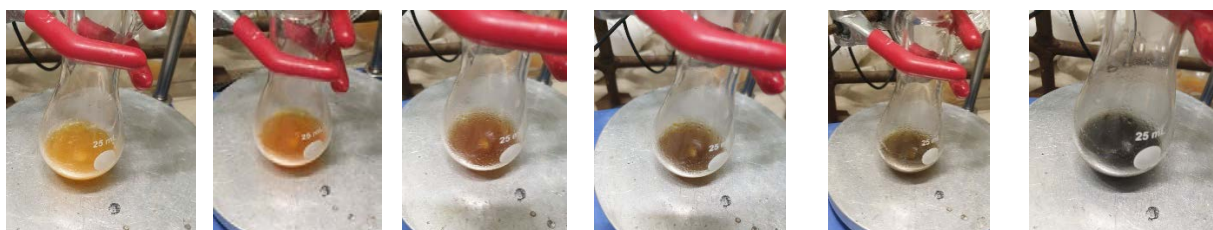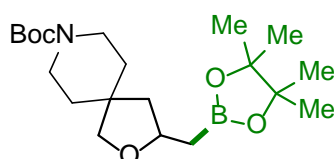

**Tert-butyl 3-((4,4,5,5-tetramethyl-1,3,2-dioxaborolan-2-yl)methyl)-2-oxa-8-azaspiro[4.5]decane-8-carboxylate (14j)**

General procedure N was used. Yield: 0.21 g, 24%.  $^1\text{H}$  NMR (500 MHz,  $\text{CDCl}_3$ )  $\delta$  = 4.19 – 4.07 (m, 1H), 3.64 (d,  $J$  = 8.6 Hz, 1H), 3.48 (d,  $J$  = 8.6 Hz, 1H), 3.41 – 3.23 (m, 4H), 1.94 (dd,  $J$  = 12.4, 6.3 Hz, 1H), 1.51 (t,  $J$  = 4.8 Hz, 4H), 1.43 (s, 9H), 1.30 – 1.25 (m, 2H), 1.22 (s, 12H), 1.07 (dd,  $J$  = 15.1, 8.3 Hz, 1H) ppm.  $^{13}\text{C}$  NMR (126 MHz,  $\text{CDCl}_3$ )  $\delta$  = 155.0, 83.3, 79.5, 77.5, 76.3, 45.3, 42.7, 41.9, 41.6, 36.5, 35.0, 28.6, 25.0, 24.8 ppm. HRMS (ESI): calc'd for  $\text{C}_{20}\text{H}_{37}\text{BNO}_5$   $[\text{M}+\text{H}]^+$  382.2765; found 382.2761.

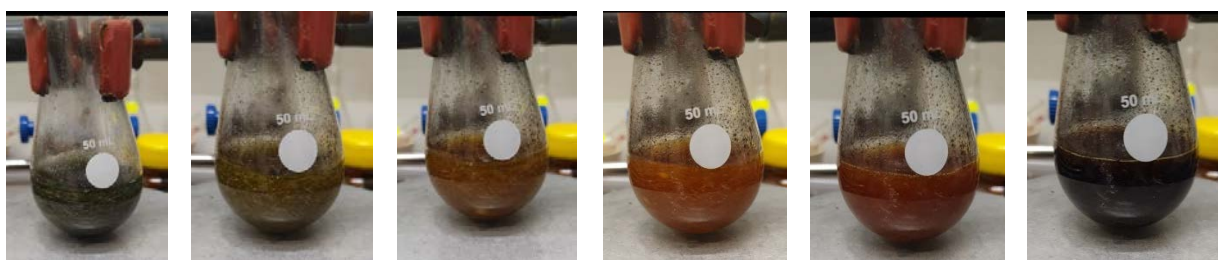

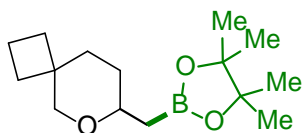

**2-(((6-Oxaspiro[3.5]nonan-7-yl)methyl)-4,4,5,5-tetramethyl-1,3,2-dioxaborolane (34j)**

General procedure N was used. Yield: 0.27 g, 39%.  $^1\text{H}$  NMR (400 MHz,  $\text{CDCl}_3$ )  $\delta$  = 3.76 (d,  $J$  = 10.9 Hz, 1H), 3.46 – 3.28 (m, 1H), 3.18 (d,  $J$  = 11.1 Hz, 1H), 2.00 – 1.94 (m, 1H), 1.80 – 1.69 (m, 4H), 1.58 – 1.49 (m, 3H), 1.45 – 1.29 (m, 2H), 1.20 (s, 12H), 1.11 – 0.95 (m, 2H) ppm.  $^{13}\text{C}$  NMR (101 MHz,  $\text{CDCl}_3$ )  $\delta$  = 83.2, 76.4, 75.2, 37.9, 36.2, 30.5, 30.3, 29.2, 28.4, 24.9, 24.9, 15.4 ppm. HRMS (ESI): calc'd for  $\text{C}_{15}\text{H}_{28}\text{BO}_3$   $[\text{M}+\text{H}]^+$  267.2132; found 267.2135.

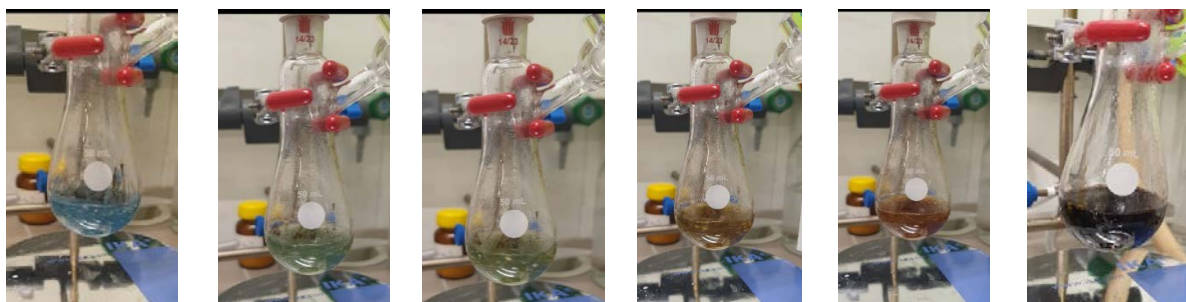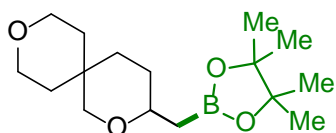

**2-(((2,9-Dioxaspiro[5.5]undecan-3-yl)methyl)-4,4,5,5-tetramethyl-1,3,2-dioxaborolane (36j)**

General procedure N was used. Yield: 0.18 g, 22%.  $^1\text{H}$  NMR (400 MHz,  $\text{CDCl}_3$ )  $\delta$  = 3.84 (d,  $J$  = 11.4 Hz, 1H), 3.70 – 3.44 (m, 5H), 3.13 (d,  $J$  = 11.4 Hz, 1H), 1.84 – 1.71 (m, 2H), 1.62 – 1.43 (m, 3H), 1.40 – 1.25 (m, 3H), 1.24 (s, 12H), 1.17 – 0.96 (m, 2H) ppm.  $^{13}\text{C}$  NMR (126 MHz,  $\text{CDCl}_3$ )  $\delta$  = 83.3, 76.3, 75.7, 64.1, 63.5, 36.2, 34.7, 31.9, 30.1, 29.1, 24.9, 24.9 ppm. HRMS (ESI): calc'd for  $\text{C}_{16}\text{H}_{30}\text{BO}_4$   $[\text{M}+\text{H}]^+$  297.2237; found 297.2235.

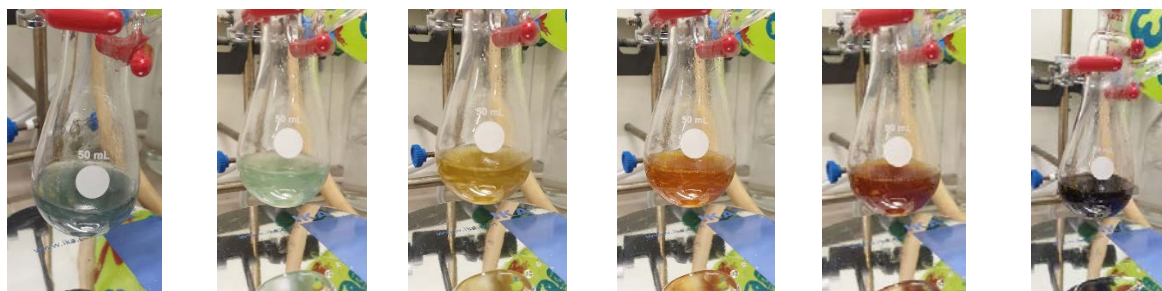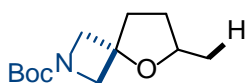

**Tert-butyl 6-methyl-5-oxa-2-azaspiro[3.4]octane-2-carboxylate (21j)**

Mixture 1. A 50 mL Schlenk flask was charged with **21f**-NHPI (1.0 g, 0.0024 mol, 1.0 equiv) in a mixture of dioxane and DMF (1:4, 24 mL, 0.1 M). The solution was degassed with argon (10 min).

Mixture 2. A 25 mL Schlenk flask was charged with bis(pinacolato)diboron (1.83 g, 0.0072 mol, 3.0 equiv), ground LiOH·H<sub>2</sub>O (1.51 g, 0.036 mol, 15.0 equiv), Cu(acac)<sub>2</sub> (30 mol%, 0.19 g, 0.00072 mol), MgBr<sub>2</sub>·Et<sub>2</sub>O (0.92 g, 0.0036 mol, 1.5 equiv) under argon. The mixture 2 was added to the mixture 1 under argon. The mixture was stirred at room temperature until the color of the reaction mixture became dark brown (see photos, 10-20 min). The mixture was diluted with MTBE (150 mL). The mixture was diluted with a sat. aq. solution of NH<sub>4</sub>Cl (200 mL), and the organic layer was separated. The organic layer was washed with a 10% aq. solution of K<sub>2</sub>CO<sub>3</sub> (2 × 150 mL), brine (1 × 150 mL), dried over Na<sub>2</sub>SO<sub>4</sub>, filtered and concentrated under reduced pressure. The final product was purified by column chromatography (hexane/EtOAc, 100:0 to 50:50). Before chromatography the silica gel in the column was washed with a mixture of hexane/Et<sub>3</sub>N (98:2, 400 mL) and 200 mL of pure hexane. Yield: 0.17 g, 31%. <sup>1</sup>H NMR (400 MHz, CDCl<sub>3</sub>) δ = 4.13 – 4.03 (m, 1H), 4.00 (d, *J* = 9.1 Hz, 2H), 3.85 (t, *J* = 8.8 Hz, 2H), 2.29 – 1.85 (m, 4H), 1.43 (s, 9H), 1.23 (d, *J* = 6.1 Hz, 3H) ppm. HRMS (ESI): calc'd for C<sub>12</sub>H<sub>22</sub>NO<sub>3</sub> [M+H]<sup>+</sup> 228.1600; found 228.1607.

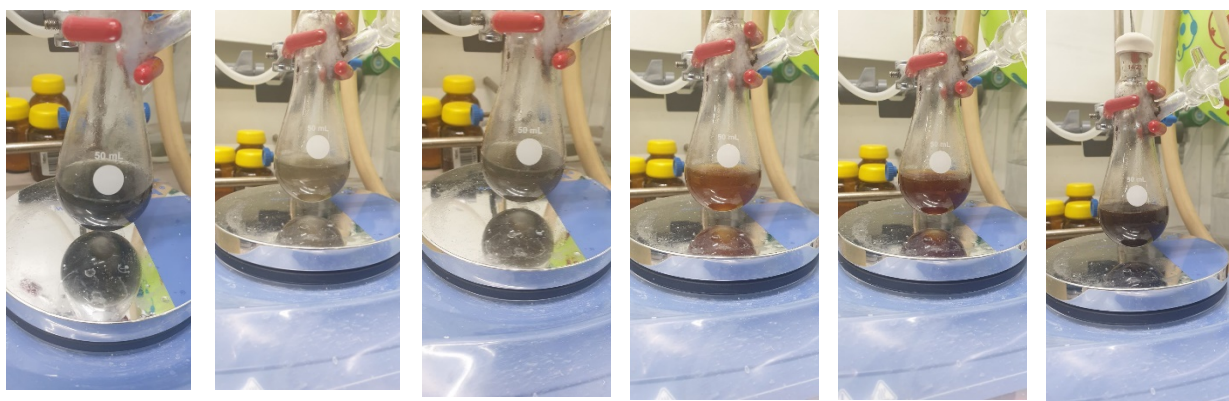



## Experimental pKa values

### Equipment

Water purification system NANOpure Diamond D11911 (Thermo Scientific Barnstead, USA) pH-meter, pH<sup>i</sup>®510 (Beckman Coulter, Canada; Cat# A58734). Multichannel Electronic Pipettes 2-125 µL, 5-250 µL, 15-1250 µL, Matrix (Thermo, USA). Magnetic stirrer standard unit (IKA, USA). Syringe Driver Mdl 100 (KDSscientific, USA).

### Analytical System

The measurements were done in accordance with Enamine's internal Standard Operating Procedure based on the technical protocols for pKa measurement provided by Pion Inc. and Sirius Analytical Inc. Acquisition and analysis of the data were performed using SmartLoggerII 1.0.14 software (Beckman Coulter). Data analysis was done using GraphPad Prism 5.01 and Excel 2010 software.

### Methods

The tendency of a compound to donate a proton is measured as its acid ionization constant (dissociation constant), or  $K_a$ . A more practical scale of representing acidity is pKa which is the negative logarithm of the  $K_a$  ( $pK_a = -\log K_a$ ). pKa of a test article is determined by pH-metric method based on potentiometric acid-base titration at 25 °C. The test and reference compounds are dissolved in acidified methanol-water (1:4) solution of NaCl (150 mM, pH 2) and slowly titrated with 10 mM sodium hydroxide methanol-water (1:4) solution, while recording pH of the solution as a function of NaOH volume used during the titration (construction of the titration curve). Titration of acidified NaCl solution in absence of any compounds is used for blank plotting. Buffering capacity is calculated in each point of titration curve as the ratio of the NaOH flow (constant) to the pH rise velocity. The pKa value is determined from resulting plot of buffering capacity versus pH as the maximum of buffering capacity. pH-metric method allows to measure pKa in range between 2.0 and 12.

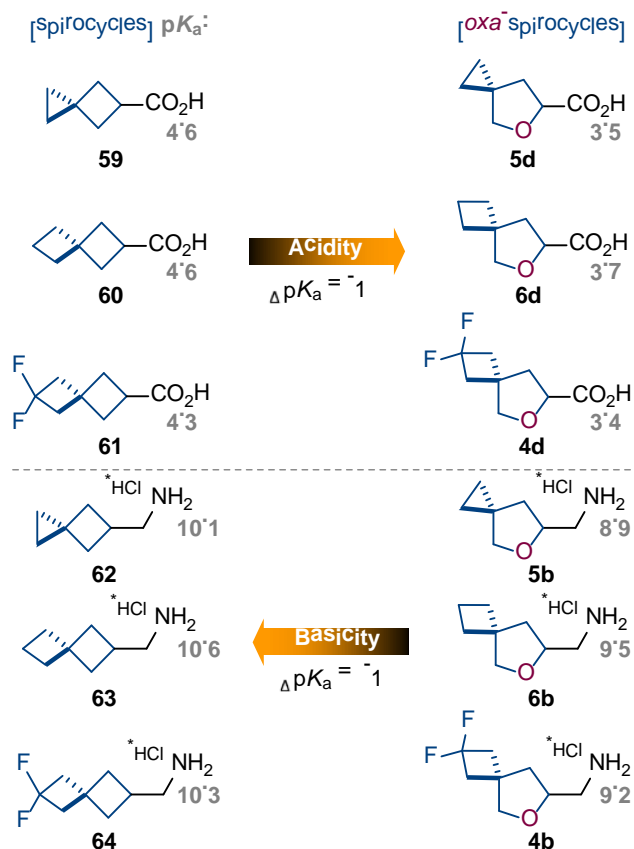

**Figure S1.** Experimental pK<sub>a</sub> values of acids **59-61**, **4d-6d**; and conjugated amines **62·HCl-64·HCl**, **4b·HCl-6b·HCl**.

Data should be considered as approximate due to specific physicochemical properties of the compound, apparently compound forms colloids in the titration media. The pK<sub>a</sub> values of reference compounds are consistent with published data, thus validating this study.

## References

1. <http://www.sirius-analytical.com/science/pka/methods-measuring-pka>
2. <http://www.mhra.gov.uk/home/groups/par/documents/websiteresources/con2023944.pdf>
3. [http://www.chem.wisc.edu/areas/reich/pkatable/pKa\\_compilation-1-Williams.pdf](http://www.chem.wisc.edu/areas/reich/pkatable/pKa_compilation-1-Williams.pdf)
4. <http://www.jbc.org/content/218/2/961.full.pdf>

### **Determination of Distribution Coefficient (LogD, pH 7.4)**

The aim of this study was to determine distribution coefficients for the test articles **66, 67, 69, 70, 72** and **73** and reference compound (Mebendazole) in *n*-octanol – phosphate buffered saline (PBS), pH 7.4. Distribution coefficient (or LogD) is a logarithm of the ratio of drug concentrations in two immiscible solvents, typically pH-buffered water and *n*-octanol. It is a measure of hydrophobic/hydrophilic properties of a given molecule. The partition of test compounds is determined using shake-flask method, which involves mixing of certain amount of the solute of interest in defined volumes of *n*-octanol and an aqueous buffer of choice followed by equilibration of the mixture by incubation with efficient mixing. Then, the distribution of the compounds in each solvent was analysed by LC-MS/MS.

### **Reagents and consumables**

DMSO Chromasolv Plus, HPLC grade,  $\geq 99.7\%$  (Sigma-Aldrich, USA; Cat #34869)

Acetonitrile Chromasolv, gradient grade, for HPLC,  $\geq 99.9\%$  (Sigma-Aldrich, USA; Cat #34851)

Formic acid for mass spectrometry,  $\sim 98\%$  (Fluka, USA; Cat #94318)

Phosphate buffered saline, tablet (Sigma-Aldrich, USA; Cat # P4417)

1-Octanol ACS grade,  $\geq 99\%$  (Sigma-Aldrich, USA; Cat # 472328)

Mebendazole analytical standard,  $\geq 98\%$ , HPLC (Sigma-Aldrich, USA; Cat # M2523)

DMSO stock solutions of the test compounds 10mM

Phenomenex Luna® C18 HPLC column, 2.1x50 mm, 5  $\mu\text{m}$  (Cat #5291-126)

1.1 ml microtubes in microracks, pipettor tips (Thermo Scientific, USA).

National Scientific MicroTube™ Rack (Thermo Fisher Scientific, USA; Cat # TN094612R)

### **Equipment**

Gradient HPLC system (Shimadzu, Japan)

Triple quadrupole mass-detector API 3000 with TurboIonSpray Ion Source (AB Sciex, Canada)

VWR Membrane Nitrogen Generators N2-04-L1466, nitrogen purity 99%+ (VWR, USA)

MTR22 Multi Mix Rotator (UNICO, USA)

Laboratory Centrifuge, Sigma 4-15C, Qiagen (SIGMA GmbH, Germany)

Water purification system Millipore Milli-Q Gradient A10 (Millipore, France)

Multichannel Electronic Pipettes 2-125  $\mu\text{L}$ , 5-250  $\mu\text{L}$ , 15-1250  $\mu\text{L}$ , Matrix (Thermo Scientific, USA; Cat ## 2001, 2002, 2004)

### **Analytical System**

All measurements were performed using Shimadzu Prominence HPLC system including vacuum degasser, gradient pumps, reverse phase column, column oven and autosampler. The HPLC system was coupled with tandem mass spectrometer API 3000 (PE Sciex). The both positive and negative



ion modes of the TurboIonSpray ion source were used. Acquisition and analysis of the data were performed using Analyst 1.5.2 software (PE Sciex).

## Methods

Incubations were carried out in Eppendorf-type polypropylene microtubes in triplicates. 5  $\mu\text{L}$  aliquot of 10 mM DMSO stock of a test compound was added into the previously mutually saturated mixture containing 500  $\mu\text{L}$  of PBS (pH 7.4) and 500  $\mu\text{L}$  of octanol. The solution was allowed to mix in a rotator for 1 hour at 30 rpm. Phase separation was assured by centrifugation for 2 min at 6000 rpm. The octanol phase was diluted 100-fold with 40% acetonitrile, and aqueous phase (PBS buffer) was analyzed without dilution or diluted 10-fold (for Mebendazole). The samples (both phases) were analyzed using HPLC system coupled with tandem mass spectrometer. Mebendazole was used as a reference compound.

Calculations of the partition ratios were carried out using the equation below.

$$D = \frac{d_o \cdot S_o}{d_p \cdot S_p}$$

where:  $S_o$  – peak area of the analyte in octanol phase

$S_p$  – peak area of the analyte in PBS buffer

$d_o$  – dilution coefficient for octanol phase

$d_p$  – dilution coefficient for aqueous phase

## Results

LogD data for the reference compound (Mebendazole) and test compounds is provided in the table below.

**Table S1.** Experimental LogD, pH 7.4

| Compound ID | Incubation | S <sub>P</sub> | S <sub>O</sub> | D        | LogD, pH 7.4 |              |
|-------------|------------|----------------|----------------|----------|--------------|--------------|
| Mebendazole | 1          | 9.74E+03       | 5.26E+05       | 5.40E+02 | 2.73         | <b>2.89</b>  |
|             | 2          | 9.93E+03       | 8.99E+05       | 9.05E+02 | 2.96         |              |
|             | 3          | 1.02E+04       | 9.61E+05       | 9.46E+02 | 2.98         |              |
| <b>69</b>   | 1          | 5.79E+03       | 4.46E+06       | 7.70E+04 | 4.89         | <b>≥4.5*</b> |
|             | 2          | 5.47E+03       | 4.73E+06       | 8.64E+04 | 4.94         |              |
|             | 3          | 5.13E+03       | 4.54E+06       | 8.84E+04 | 4.95         |              |
| <b>70</b>   | 1          | 2.73E+04       | 2.47E+06       | 9.03E+03 | 3.96         | <b>3.97</b>  |
|             | 2          | 2.73E+04       | 2.52E+06       | 9.22E+03 | 3.96         |              |
|             | 3          | 2.67E+04       | 2.50E+06       | 9.40E+03 | 3.97         |              |
| <b>66</b>   | 1          | 3.79E+03       | 1.12E+06       | 2.95E+04 | 4.47         | <b>4.46</b>  |
|             | 2          | 3.91E+03       | 1.12E+06       | 2.87E+04 | 4.46         |              |
|             | 3          | 4.26E+03       | 1.14E+06       | 2.66E+04 | 4.43         |              |
| <b>73</b>   | 1          | 5.12E+04       | 1.94E+06       | 3.79E+03 | 3.58         | <b>3.58</b>  |
|             | 2          | 5.35E+04       | 2.00E+06       | 3.75E+03 | 3.57         |              |
|             | 3          | 5.32E+04       | 2.01E+06       | 3.78E+03 | 3.58         |              |
| <b>72</b>   | 1          | 8.79E+03       | 2.17E+06       | 2.46E+04 | 4.39         | <b>4.40</b>  |
|             | 2          | 9.35E+03       | 2.29E+06       | 2.45E+04 | 4.39         |              |
|             | 3          | 8.81E+03       | 2.30E+06       | 2.61E+04 | 4.42         |              |
| <b>67</b>   | 1          | 1.69E+04       | 7.00E+05       | 4.14E+03 | 3.62         | <b>3.64</b>  |
|             | 2          | 1.70E+04       | 7.21E+05       | 4.24E+03 | 3.63         |              |
|             | 3          | 1.55E+04       | 7.17E+05       | 4.64E+03 | 3.67         |              |

\*Reliable measurable range is approximately -1 to 4.5

## Analysis of Aqueous Solubility

### Study Objective

Six test articles (**66, 67, 69, 70, 72 and 73**) and reference compound (Ondansetron) were assessed for kinetic solubility in phosphate-buffered saline, pH 7.4.

### Reagents and consumables

Phosphate buffered saline, pH 7.4 (Sigma-Aldrich, USA; Cat #P3813)

Acetonitrile Chromasolv, gradient grade, for HPLC,  $\geq 99.9\%$  (Sigma-Aldrich, USA; Cat #34851)

Ondansetron base powder (Enamine, Ukraine, Cat # EN300-117273)

DMSO (Sigma-Aldrich, USA; Cat # 34869)

Costar 96 Well Assay Blocks (Corning, USA; Cat # 3958)

MultiScreen HTS 96 Well Filter Plates (Millipore, Ireland; Cat # MSGVS2210)

UV-Star® 96 Well Microplate (Greiner Bio-One, Germany; Cat #655801)

Matrix Disposable pipette tips (ThermoScientific, USA; Cat ## 8041, 7622, 7321)

Flex-Tubes Microcentrifuge Tubes, 1.5ml (Eppendorf, Germany; Cat # 22364111)

Matrix Storage tubes, 1.4 ml (ThermoScientific, USA; Cat # 4247)

### Equipment

Water purification system Millipore Milli-Q Gradient A10 (Millipore, France)

Thermomixer R Block, 1.5 ml (Eppendorf, Germany; Cat # 5355)

Matrix Multichannel Electronic Pipette 2-125  $\mu\text{L}$ , 5-250  $\mu\text{L}$ , 15-1250  $\mu\text{L}$  (Thermo Scientific, USA; Cat ## 2011, 2012, 2004)

SpectraMax Plus Microplate Reader (Molecular Devices, USA; Product # 02196)

Multi-Well Plate Vacuum Manifold (Pall Corporation, USA; Product # 5014)

Vacuum pump (Millipore, USA; Model # XX5500000)

### Analytical System

The measurements were performed using SpectraMax Plus reader in UV-Vis mode. Acquisition and analysis of the data were performed using SoftMax Pro v.5.4 (Molecular Devices) and Excel 2010 data analysis software.

## Methods

Kinetic solubility assay was performed according to the Enamine's aqueous solubility SOP. Briefly, using a 20 mM stock solution of the compounds in 100% DMSO dilutions were prepared to a theoretical concentration of 400  $\mu$ M in duplicates in phosphate-buffered saline pH 7.4 (138 mM NaCl, 2.7 mM KCl, 10 mM K-phosphate) with 2% final DMSO. The experimental compound dilutions in PBS were further allowed to equilibrate at 25 °C on a thermostatic shaker for two hours and then filtered through HTS filter plates using a vacuum manifold. The filtrates of test compounds were diluted 2-fold with acetonitrile with 2% DMSO before measuring.

In parallel, compound dilutions in 50% acetonitrile/PBS were prepared to theoretical concentrations of 0  $\mu$ M, 10  $\mu$ M, 25  $\mu$ M, 50  $\mu$ M, 100  $\mu$ M and 200  $\mu$ M with 2% final DMSO to generate calibration curves. Ondansetron was used as reference compound to control proper assay performance. 200  $\mu$ l of each sample was transferred to 96-well plate and measured in 200-550 nm range with 5 nm step. The concentrations of compounds in PBS filtrate are calculated using a dedicated Microsoft Excel calculation script. Proper absorbance wavelengths for calculations are selected for each compound manually based on absorbance maximums (absolute absorbance unit values for the minimum and maximum concentration points within 0 – 3 OD range). Each of the final datasets is additionally visually evaluated by the operator and goodness of fit ( $R^2$ ) is calculated for each calibration curve. The effective range of this assay is approximately 2-400  $\mu$ M and the compounds returning values close to the upper limit of the range may have higher actual solubility (e.g. 5'-deoxy-5-fluorouridine). This method is not suitable for liquid (at 25 °C) substances (were not present among the tested compounds).

## Results

**Table S2.** The solubility data of the test and reference compounds are listed in the table below. The calibration curves are shown in the Appendix.

| ID                           | PBS solubility, pH 7.4, $\mu\text{M}$ |              |              | SE  |
|------------------------------|---------------------------------------|--------------|--------------|-----|
|                              | Incubation 1                          | Incubation 2 | Mean         |     |
| <b>Ondansetron</b>           | 104                                   | 101          | <b>103**</b> | 1.6 |
| EN300-27699318 ( <b>69</b> ) | 7                                     | 7            | <b>7</b>     | 0.1 |
| EN300-27699324 ( <b>70</b> ) | 118                                   | 118          | <b>118</b>   | 0.0 |
| EN300-27721010 ( <b>66</b> ) | 3                                     | 2            | <b>3</b>     | 0.4 |
| EN300-27721011 ( <b>73</b> ) | 33                                    | 34           | <b>34</b>    | 0.5 |
| EN300-27721012 ( <b>72</b> ) | 9                                     | 9            | <b>9</b>     | 0.1 |
| EN300-27721013 ( <b>67</b> ) | 361                                   | 358          | <b>360</b>   | 1.6 |

\*Goodness of fit ( $R^2$ ) in all titration curves as well as the variations between repeat measurements indicates high quality of the experimental data in the current batch of test articles.

\*\*Ondansetron solubility data are consistent with previously obtained

## APPENDIX

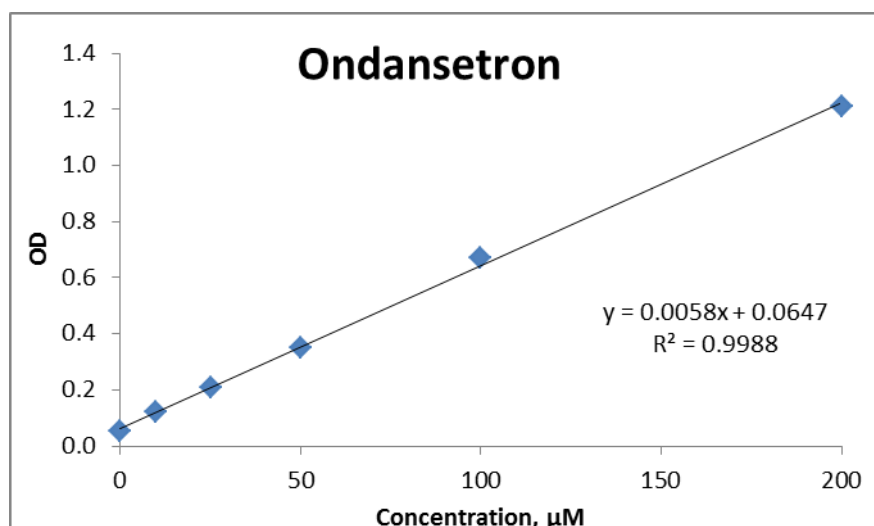

**Figure S2.** Calibration curve for **Ondansetron**

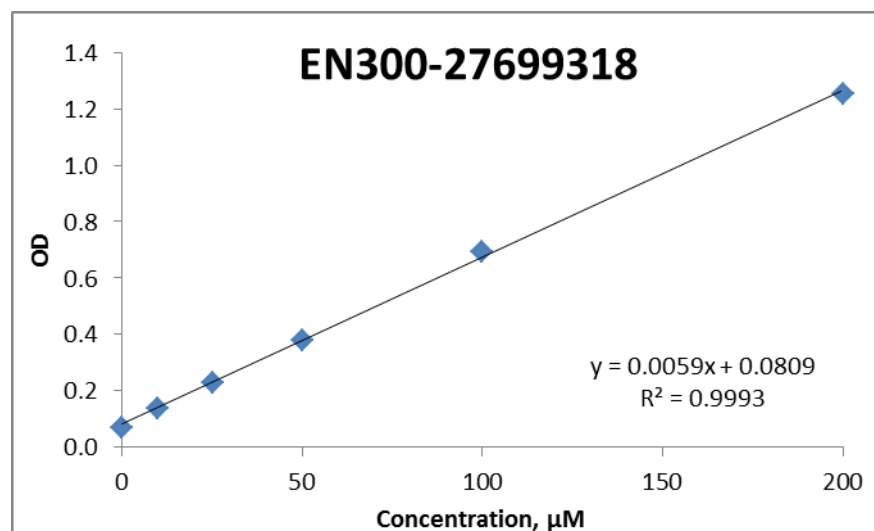

**Figure S3.** Calibration curve for **EN300-27699318 (69)**

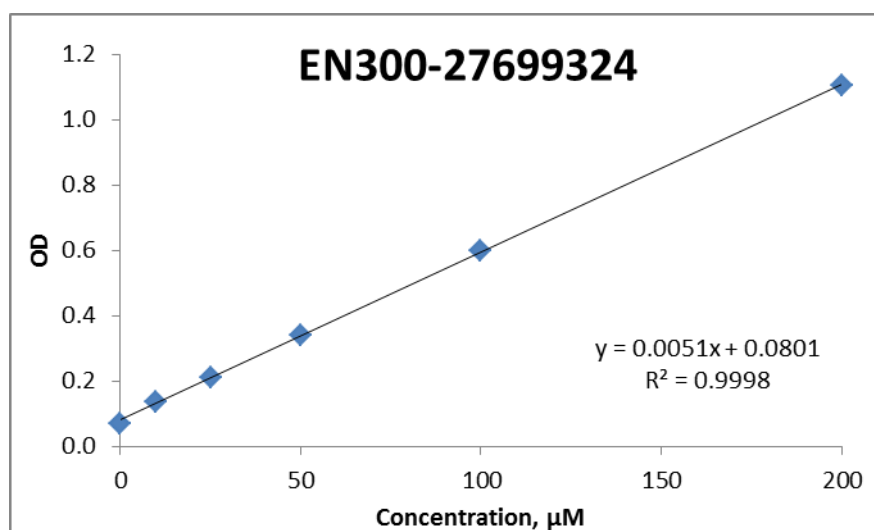

**Figure S4.** Calibration curve for **EN300-27699324 (70)**

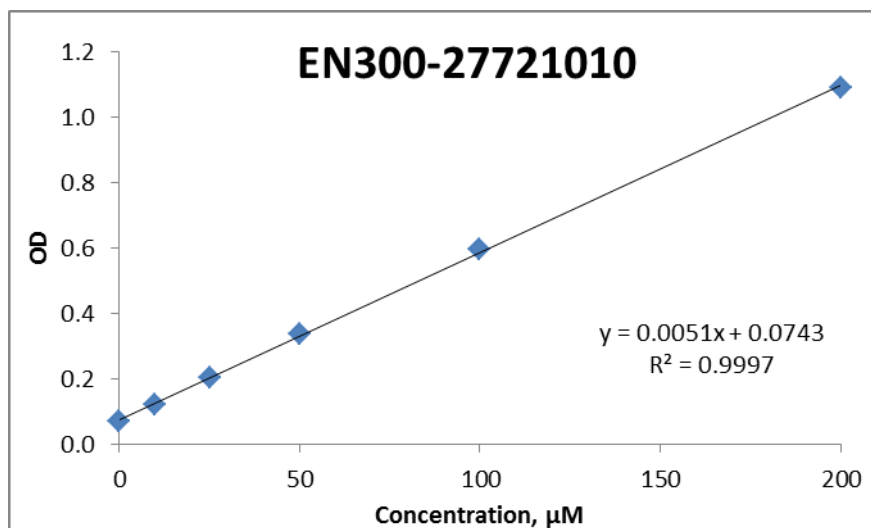

**Figure S5.** Calibration curve for EN300-27721010 (66)

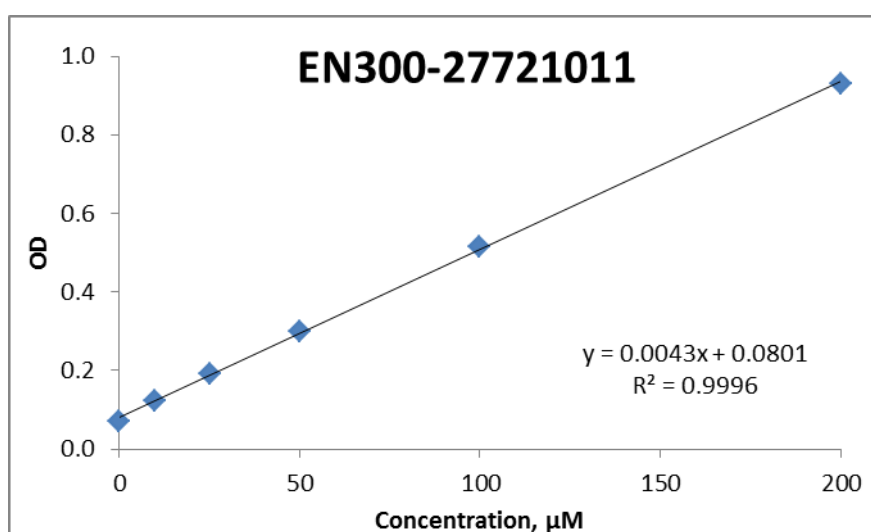

**Figure S6.** Calibration curve for EN300-27721011 (73)

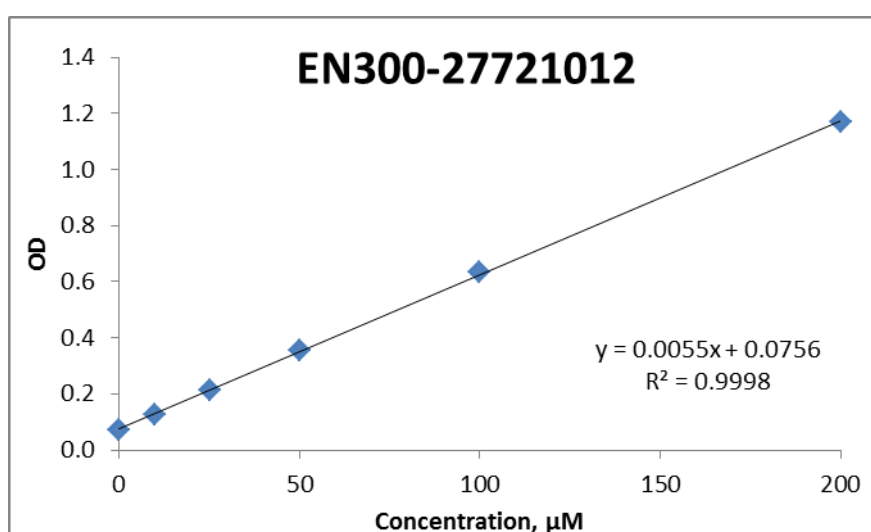

**Figure S7.** Calibration curve for EN300-27721012 (72)

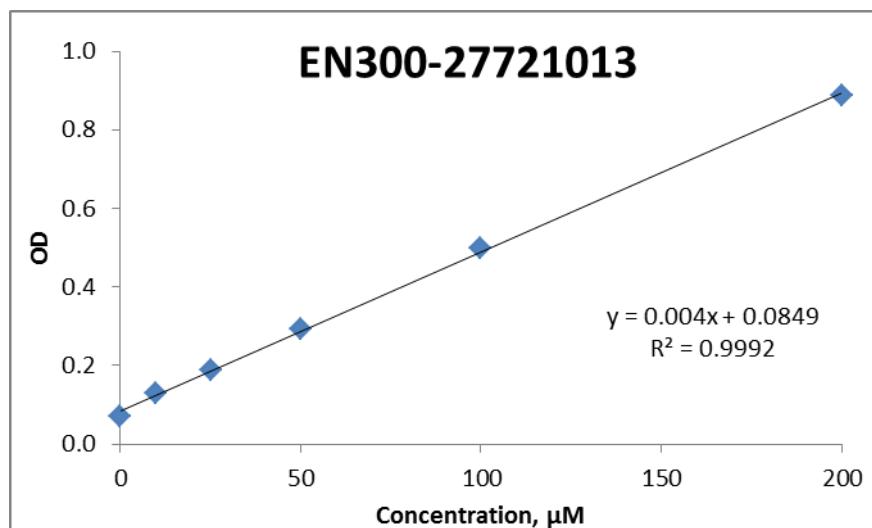

**Figure S8.** Calibration curve for **EN300-27721013 (67)**



## Biological activity (blood pressure tests)

### Materials and Methods

#### Animals

Studies were conducted using 6 month old spontaneously hypertensive (SHR) male rats with the average body weight of  $310 \pm 6$  g and basal systolic blood pressure not less than 185 mmHg, which were in-home bred in Bienta animal facility. Animals were randomly housed in plastic cages five rats per cage, had free access to water and standard rodent chow *ad libitum* until beginning of the study and maintained at 20-25 °C with a light/dark cycle of 12/12 h. Study design, animal selection, handling and treatment were in accordance with Bienta Animal Care and Use Guidelines, and European Union directive 2010/63/EU.

#### Blood pressure measurement

The chemicals were dissolved in pure saline (**76**, **77**, **78** and **79**) or in saline containing 4% of captisol (**75**). Animals received 3 mg/kg compound in 5 mL/kg vehicle per os once. Terazosin was used as a reference in the same dosing. Four animals per group were assigned.

Blood pressure (BP) of rats was measured by Tail-Cuff Method using Coda Non-invasive Blood-Pressure System (Kent Scientific Corporation, CT, USA). Rats were placed in plastic holders setting on the warming platform to achieve the tail temperature of 32-35 °C before the testing. Systolic and diastolic BP and heart rate were measured in 15, 60 and 120 min after the dosing, BP lowering values compared to baseline were calculated. To achieve the stable values, the rats were trained before the procedure for 4-5 days.

#### Statistical analysis

Statistical analysis was performed using two-way ANOVA with Tukey's multiple comparisons test (GraphPad Prism 9.0.1 software for Windows). The difference between groups was considered significant if  $p < 0.05$ .

#### Results

When analyzing the absolute BP values, we observed that all the tested compounds had no differences in efficacy compared to prototype terazosin. All the chemicals decreased systolic blood pressure at least at one time point. If compared the efficacy in blood pressure decrease, one can see that terazosin, **75**, **76** and **78** decreased both systolic and diastolic blood pressure in 15 and 60 min after the dosing by 48-78 mmHg and by 31-56 mmHg, respectively, compared to basic values. Moreover, both systolic and diastolic blood pressure retained low also in 120 min after the dosing (by 27-34 mmHg compared to basic values) in groups which received **76** and **78**. In group which received compound **75** only diastolic blood pressure remained depressed in 120 min after the dosing (by 28 mmHg compared to basic value).

If compared the BP lowering values, compounds **75**, **76** and **78** demonstrated the same tendency as terazosin does: the maximum BP lowering in 15 min after the dosing with subsequent decrease the BP lowering values. Moreover, **75** decreased systolic BP even more significantly than the reference terazosin did ( $p = 0.01$ ). The BP dynamics of rats received **77** and **79** are different: the first one had the maximum efficacy in 60 min after the dosing, and the second one consequently depressed systolic BP with the maximum depression in 120 min after the dosing, remaining, however at the terazosin's level. Diastolic BP lowering demonstrated the same tendency as systolic one for all tested compounds except terazosin, which depressed BP similarly in all time points.

### **Conclusion**

Compounds **75**, **76** and **78** demonstrated ability to depress both systolic and diastolic BP in SHR rats substantially and similarly to the reference terazosin at least due to 15-120 min after the single dose. Furthermore, systolic BP lowering in 15 min after the dose caused by **75** was more significant compared to that caused by terazosin. Thus, **75** could be a potent antihypertensive therapeutic aimed to fast lowering of increased BP.

## Method

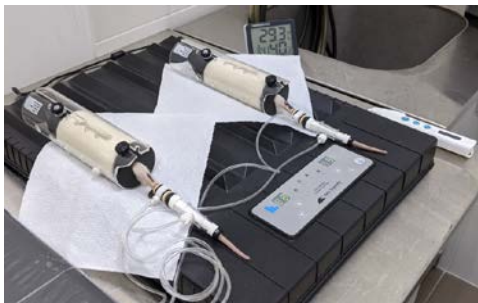

The noninvasive rat blood pressure measurement methodology consists of utilizing a tail-cuff placed on the tail of experimental animal to occlude the blood flow. The following parameters have been tested: systolic and diastolic blood pressure, heart rate, blood flow.

Coda High Throughput System have been used during in vivo experiment.

## Numbering of compounds

Enamine internal number (EN) – numeration in the manuscript

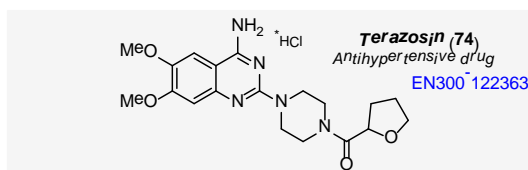

- EN300-122363 – compound **74**
- EN300-26869300 – compound **75**
- EN300-26862353 – compound **76**
- EN300-26862358 – compound **77**
- EN300-26862365 – compound **78**
- EN300-26862363 – compound **79**

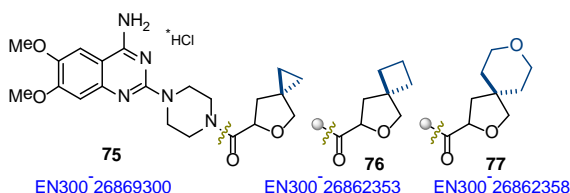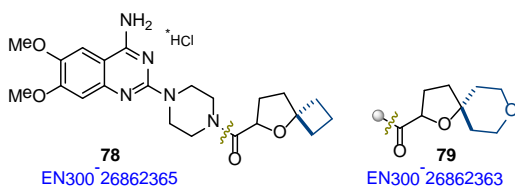

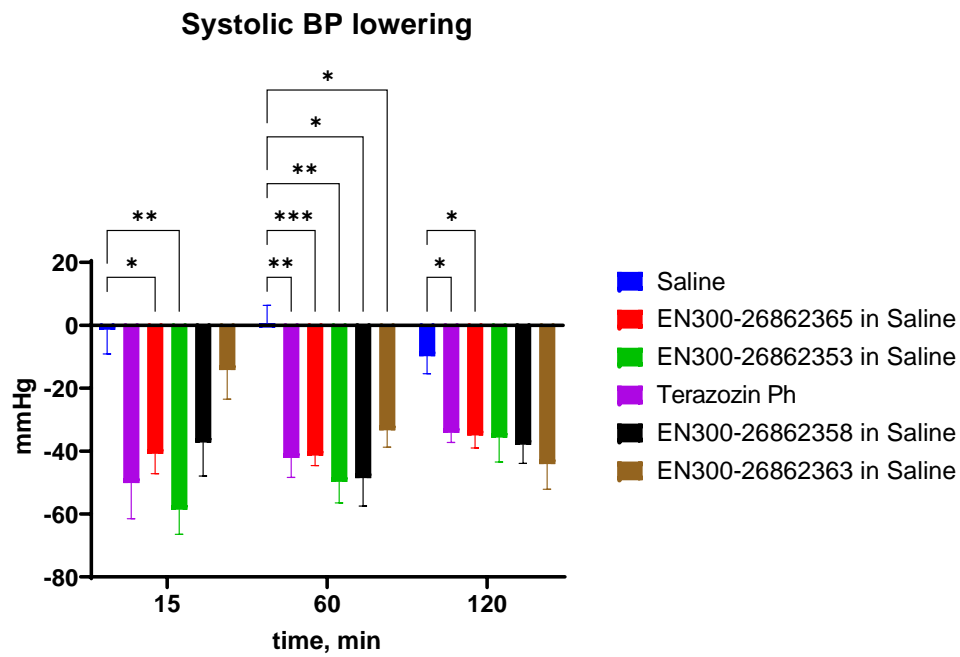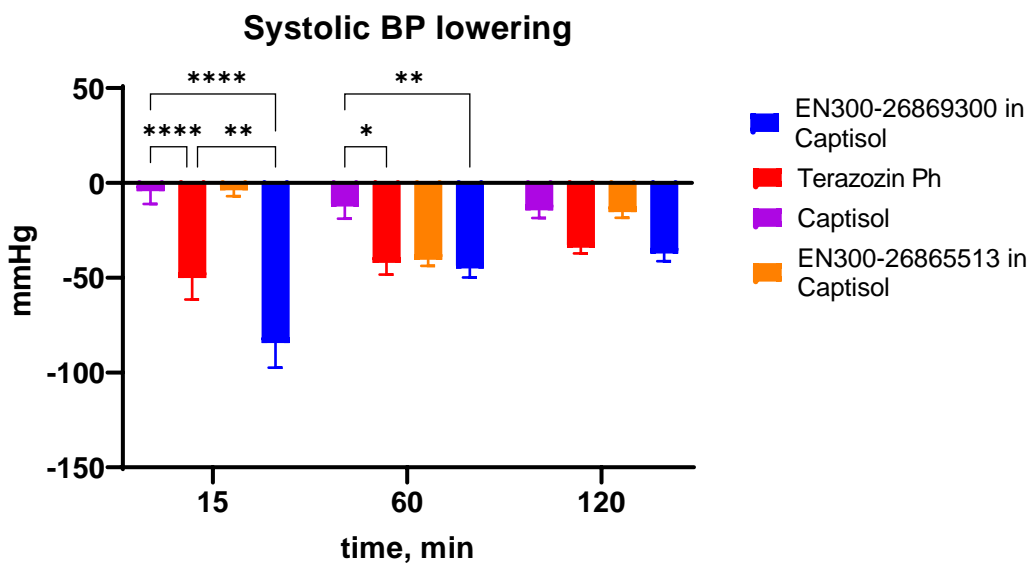

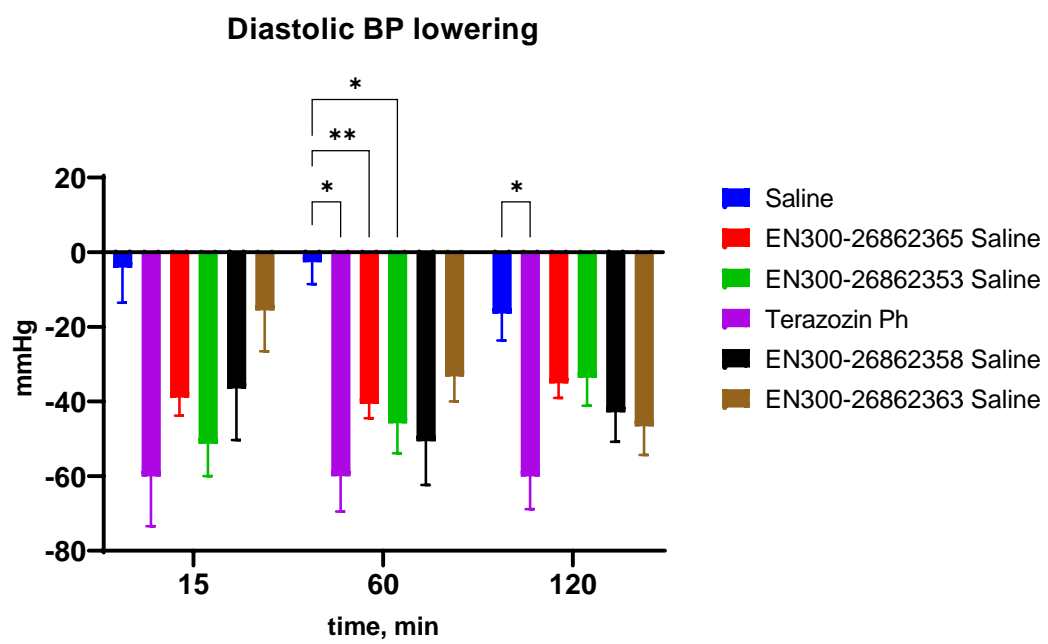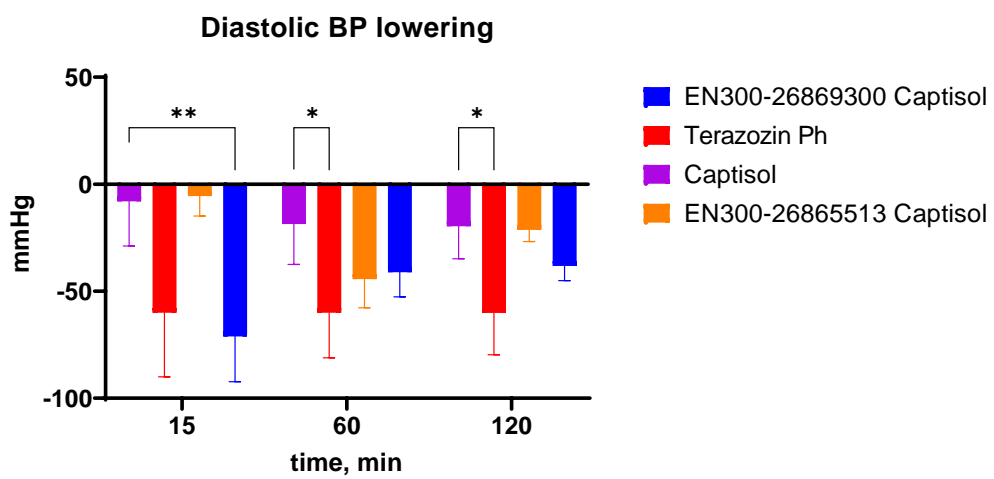

# Copies of $^1\text{H}$ , $^{19}\text{F}$ and $^{13}\text{C}$ spectra

## Compound 4a

R1718609

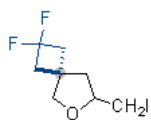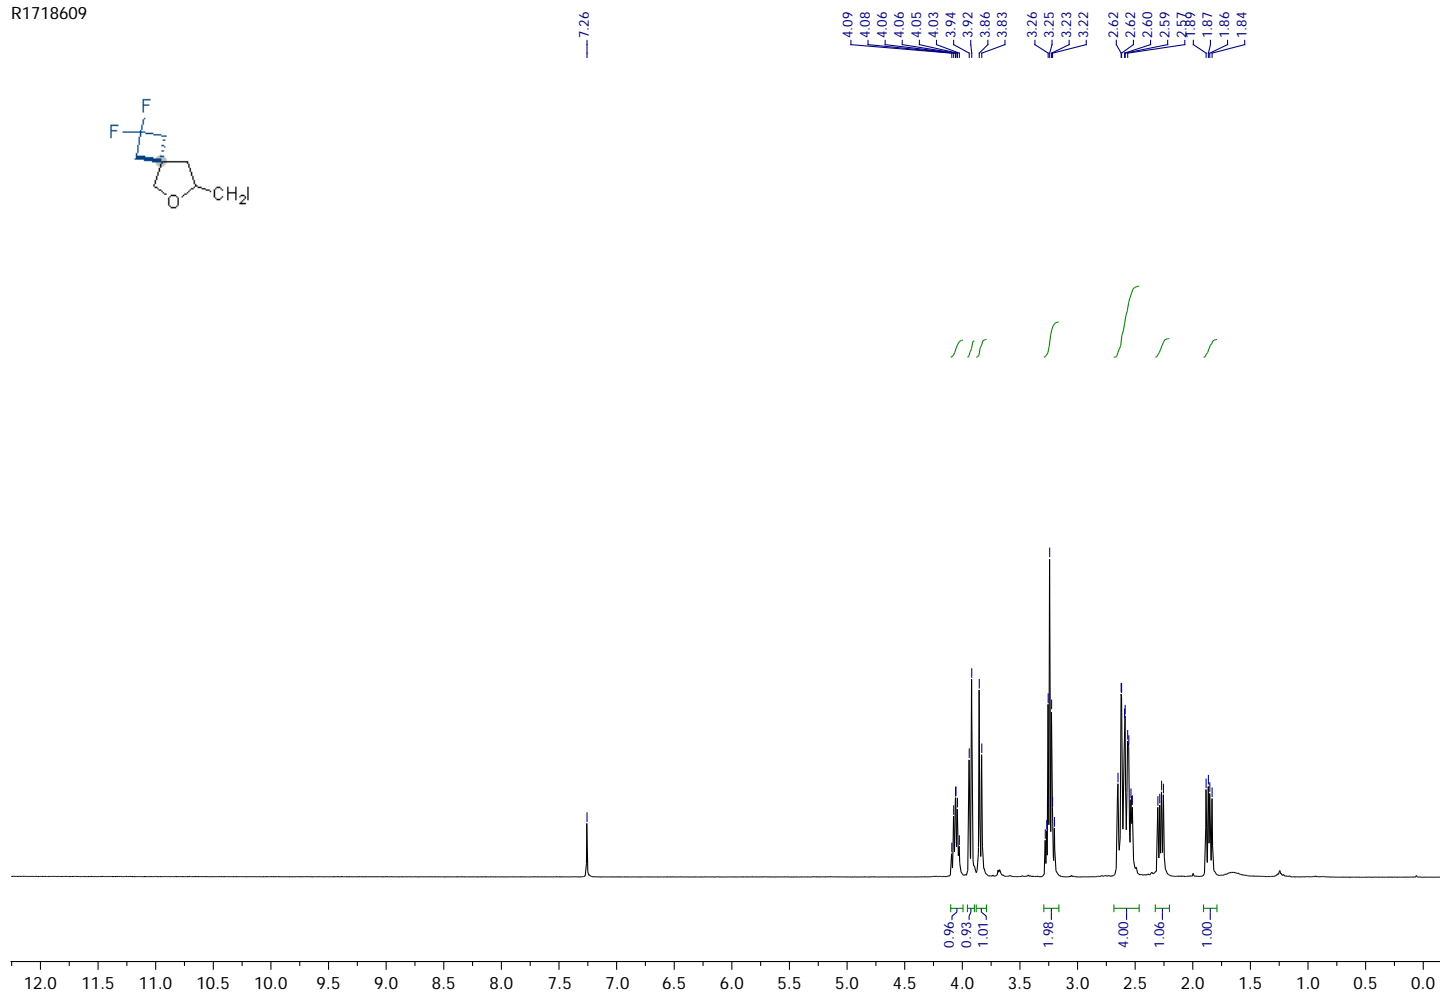

R1718609\_C13\_T

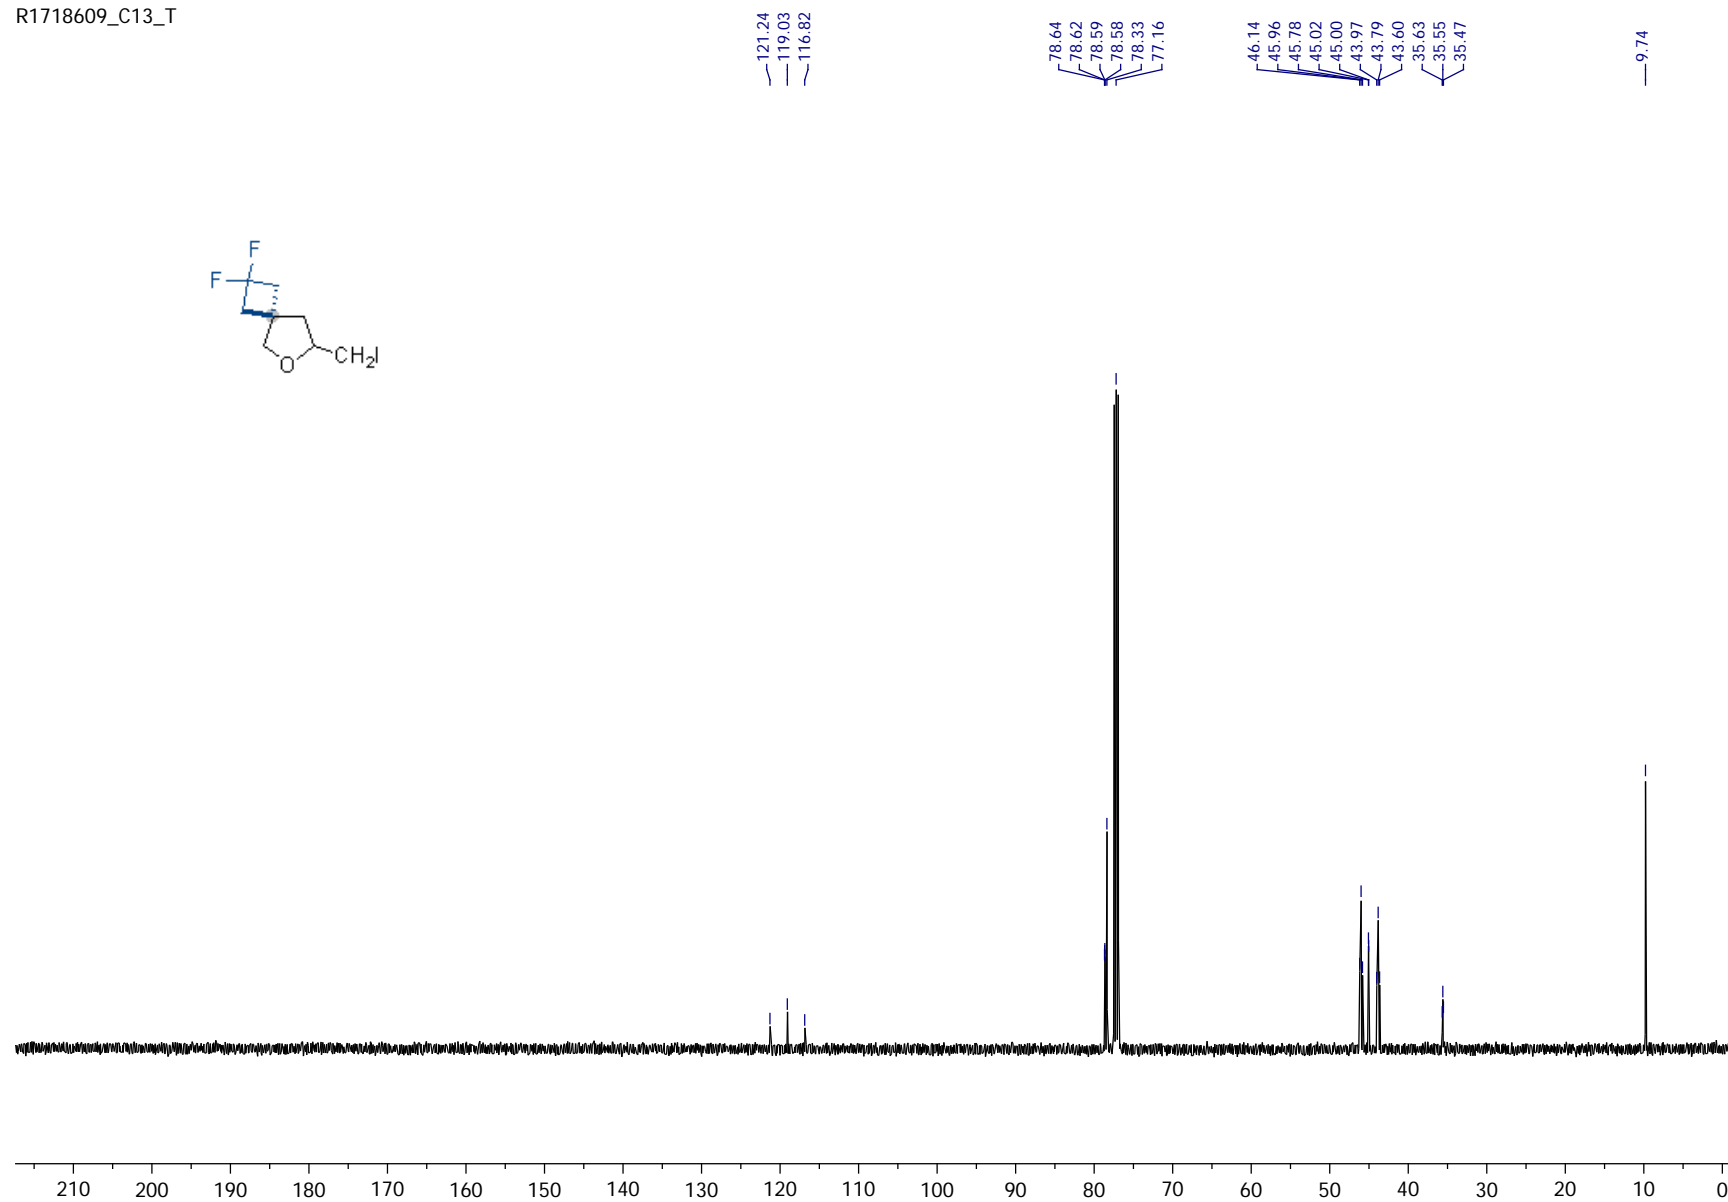

R1718609\_F19{H}

-90.56  
-91.09  
-92.00  
-92.52

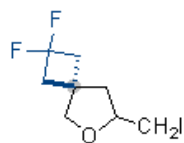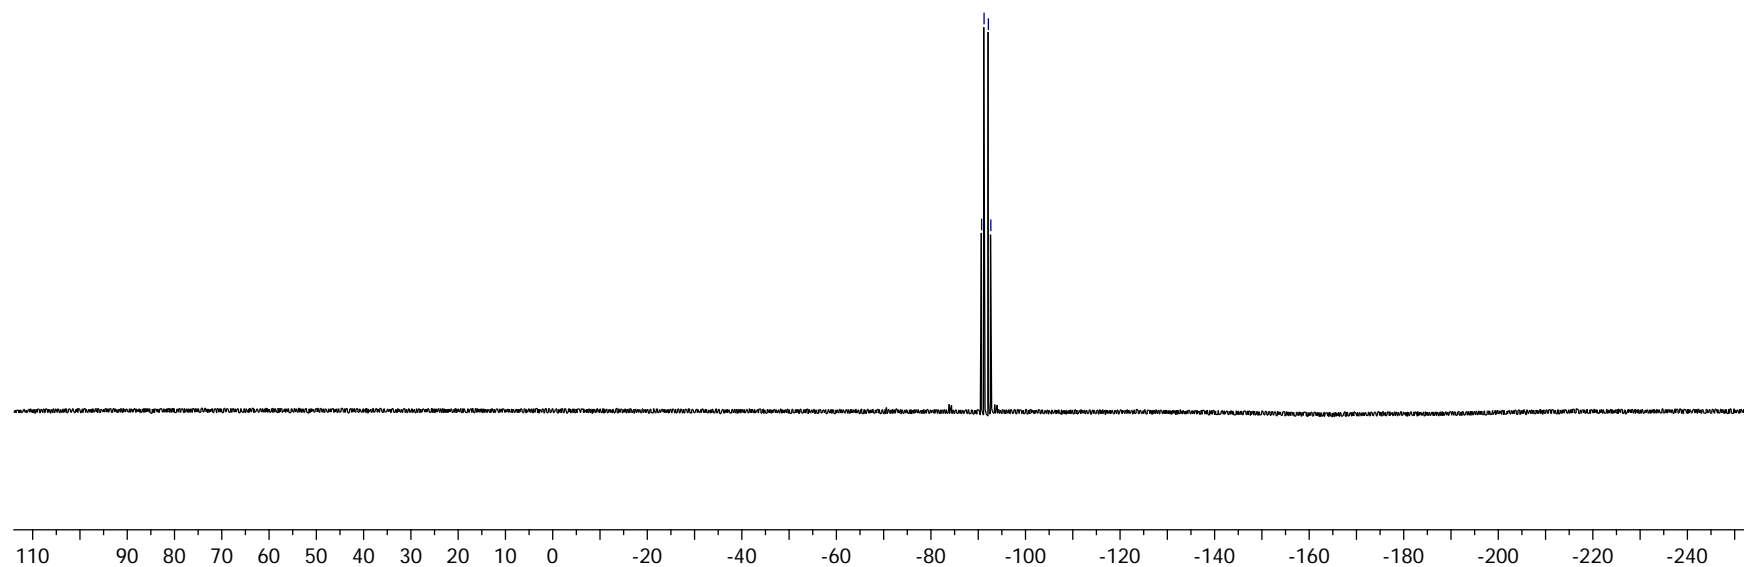



Compound 5a

R1684612

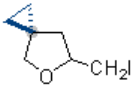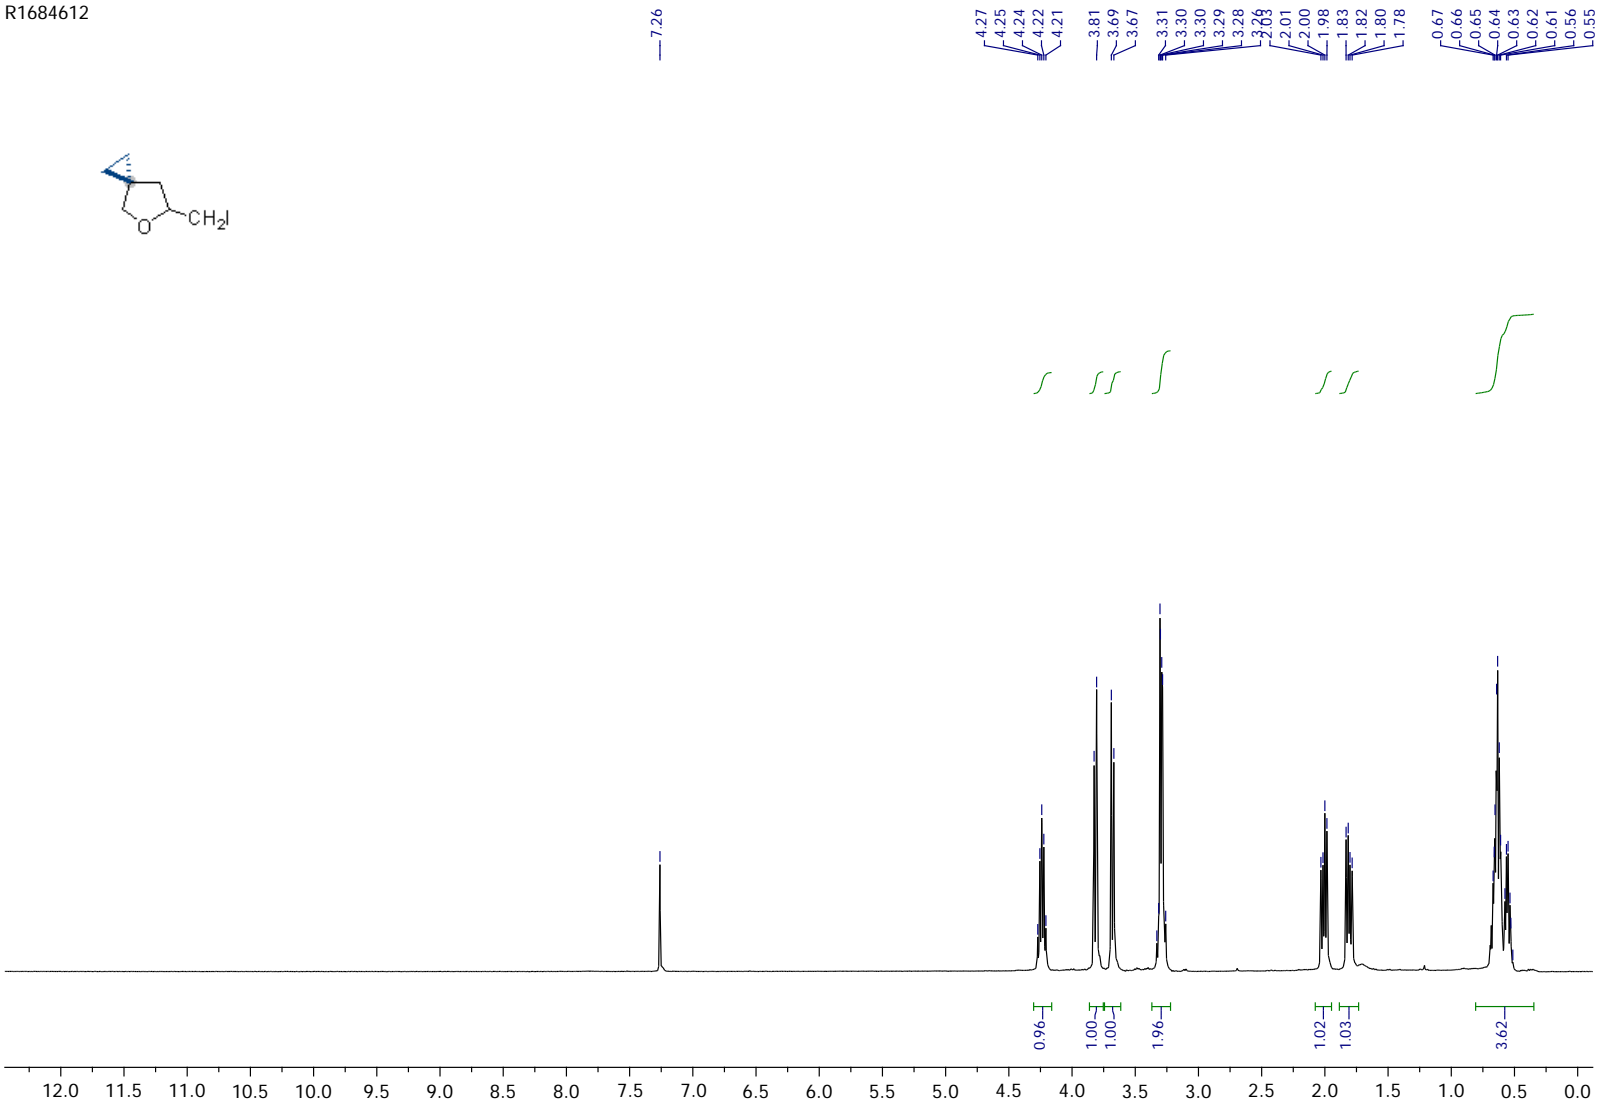

R1684612\_C13

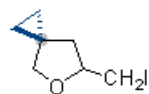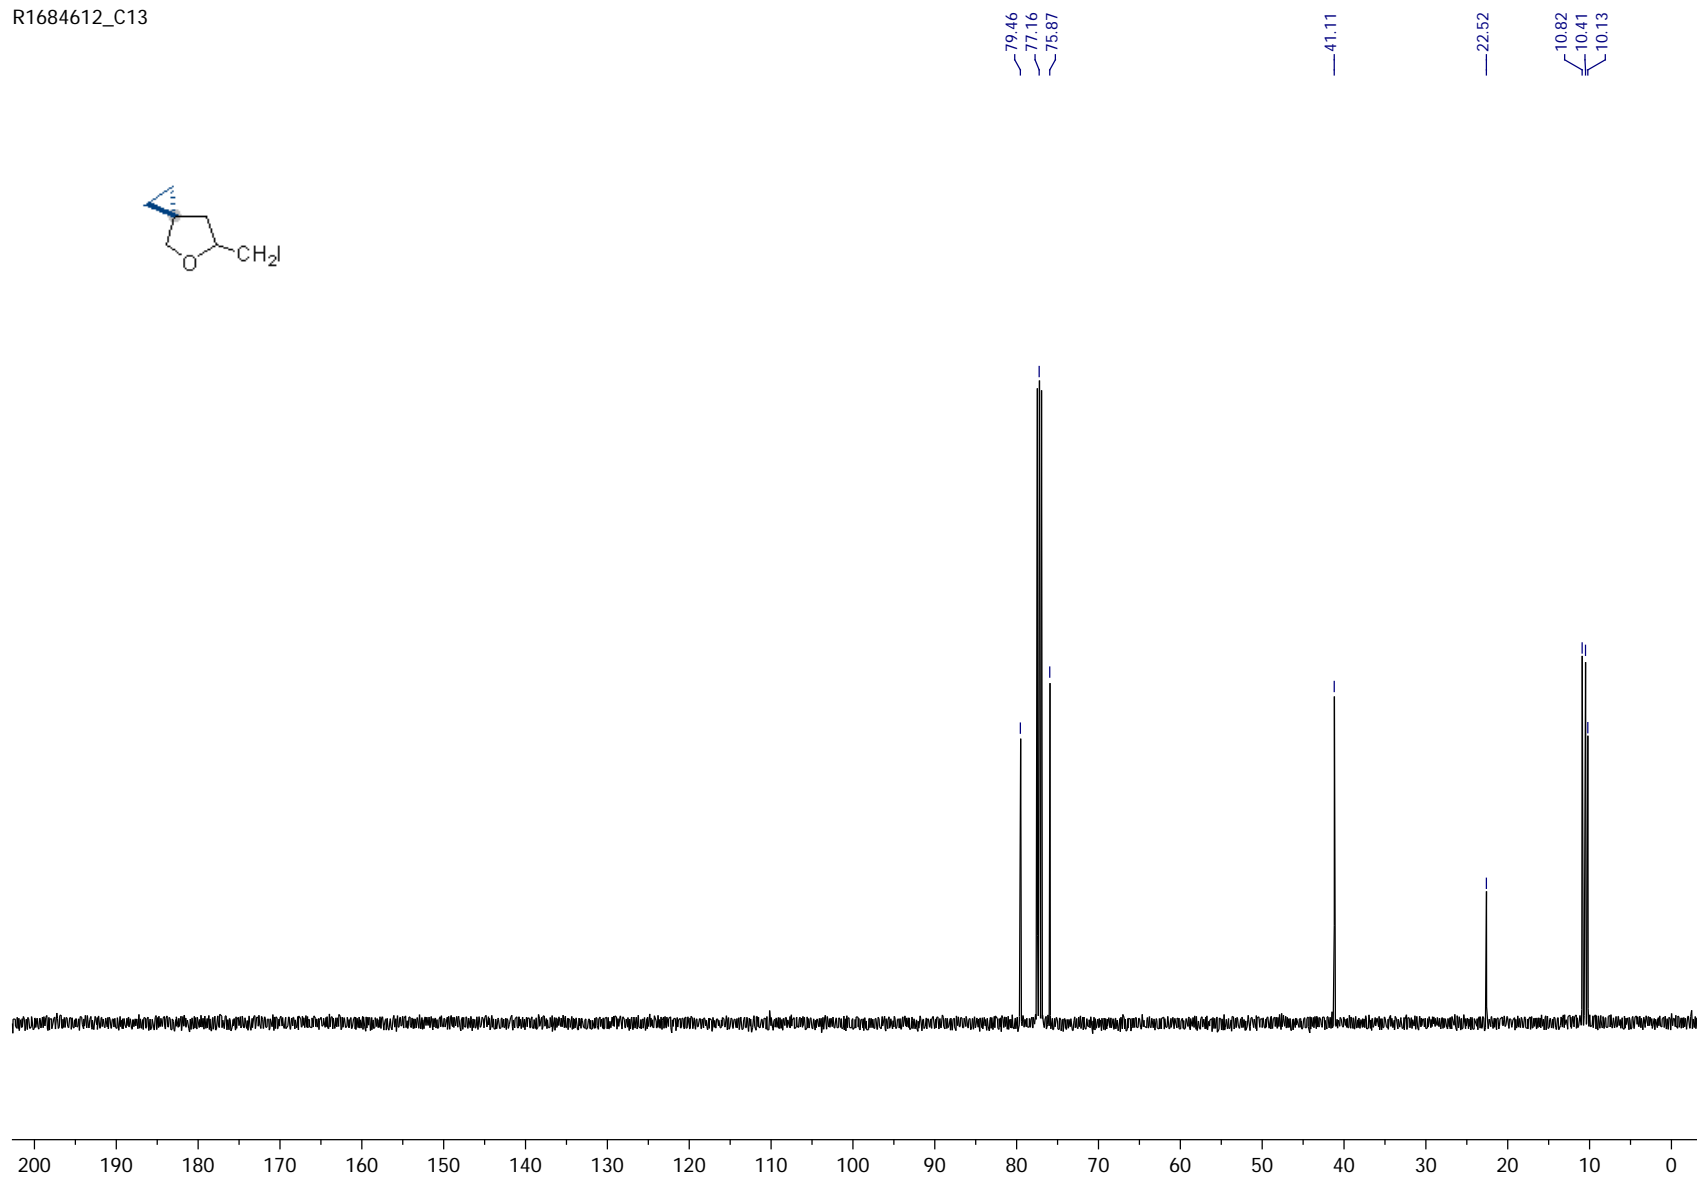

Compound 6a

R796988

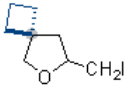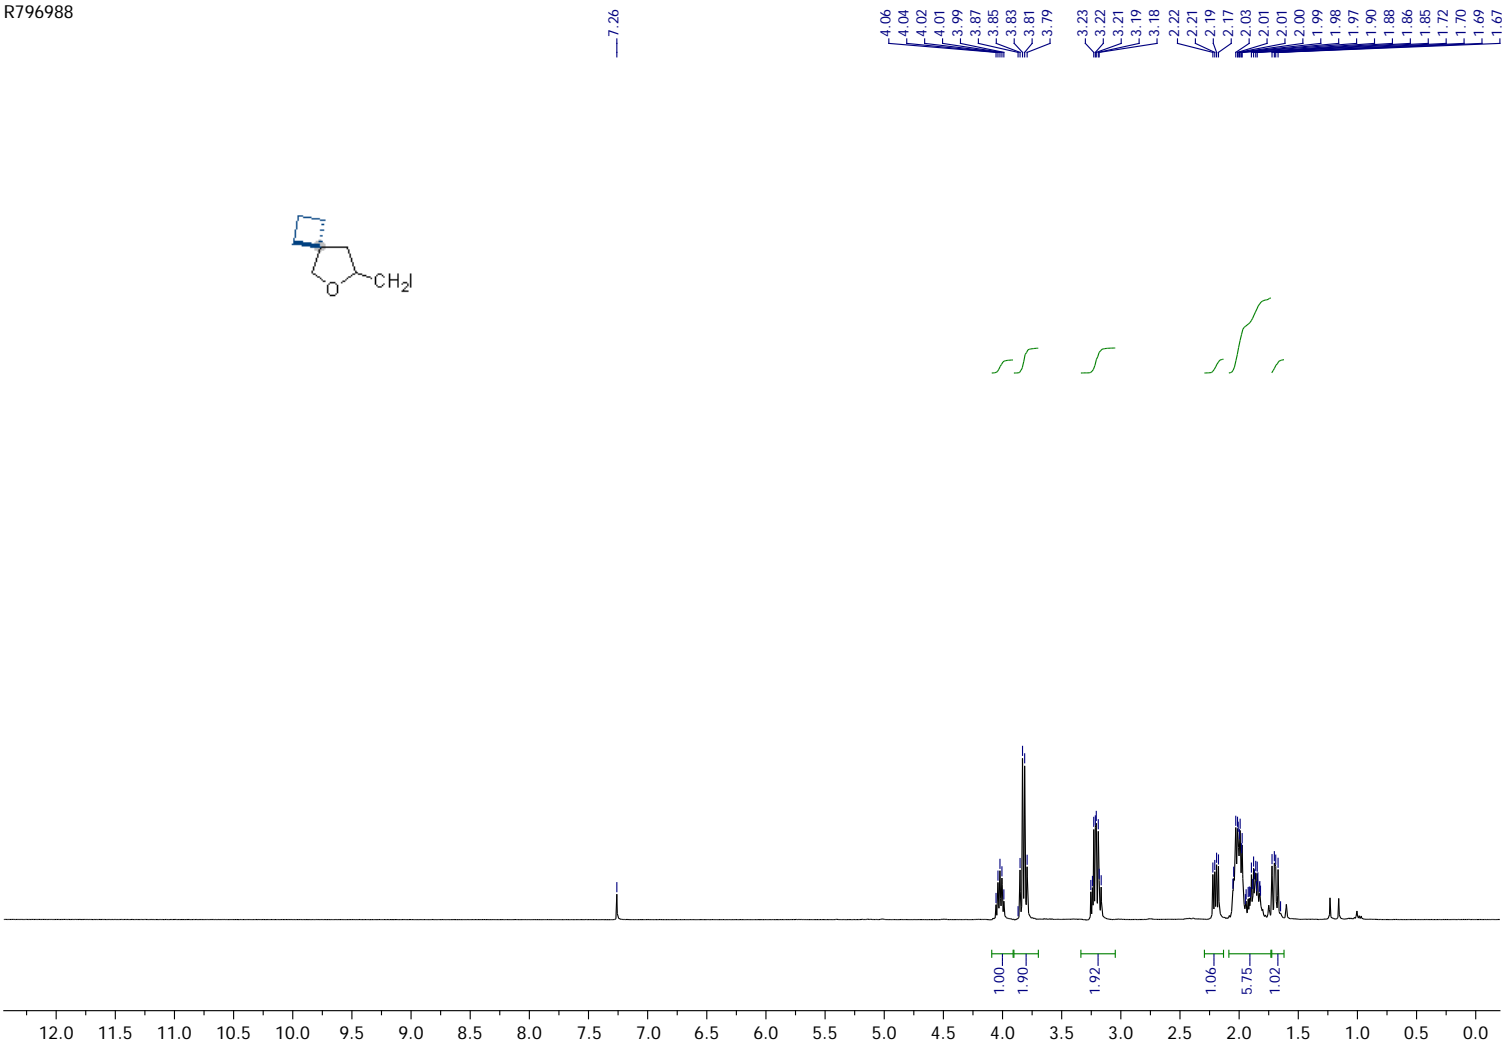

R796988\_C13

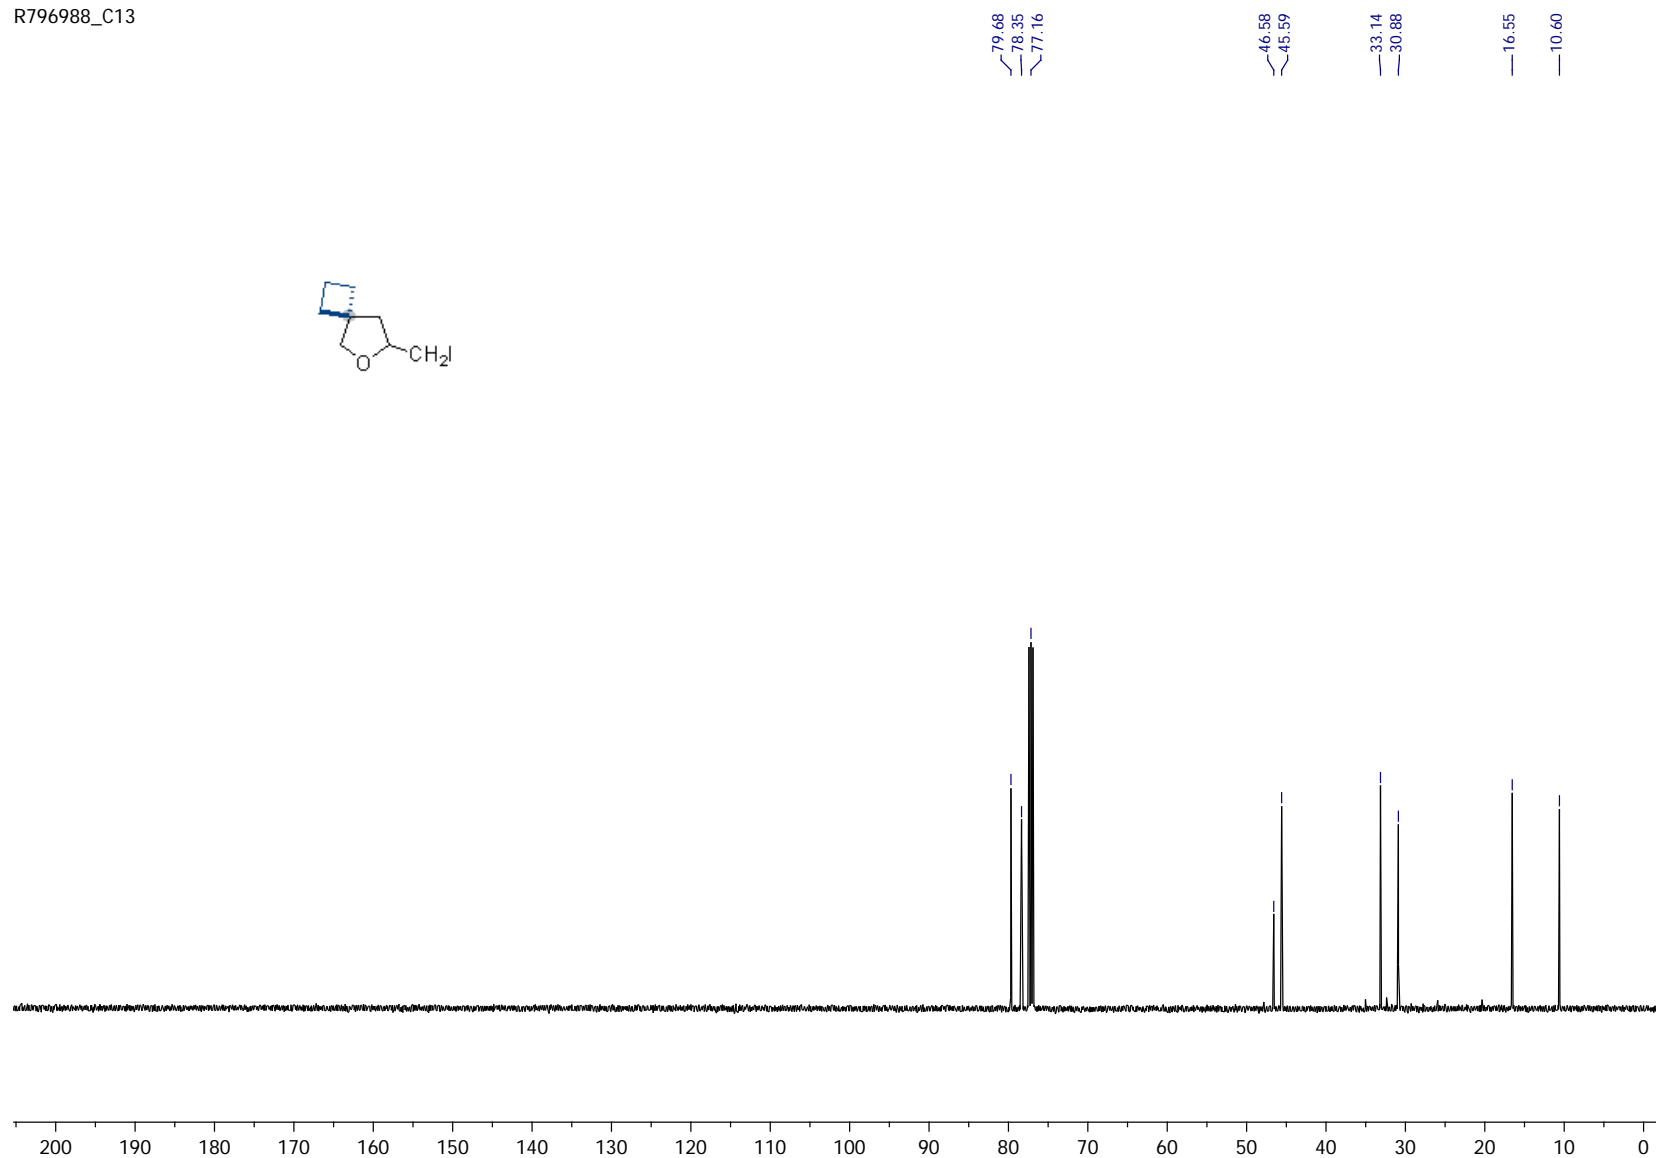

Compound 7a

R1657182

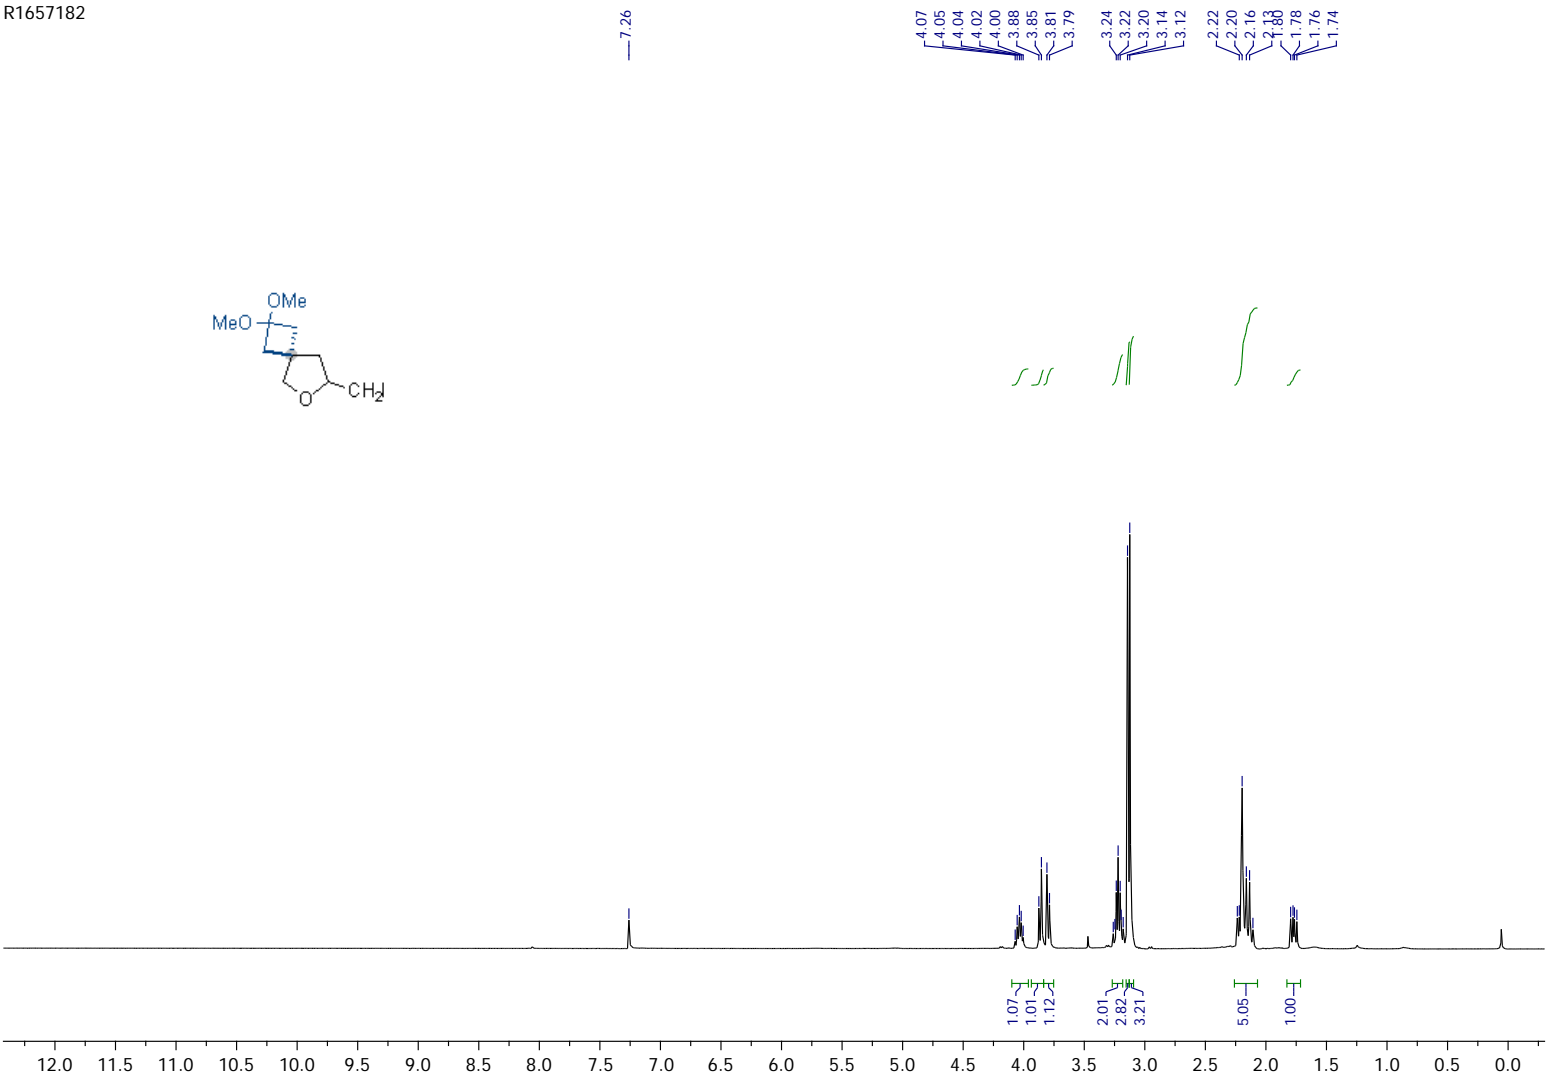

R1657182\_C13

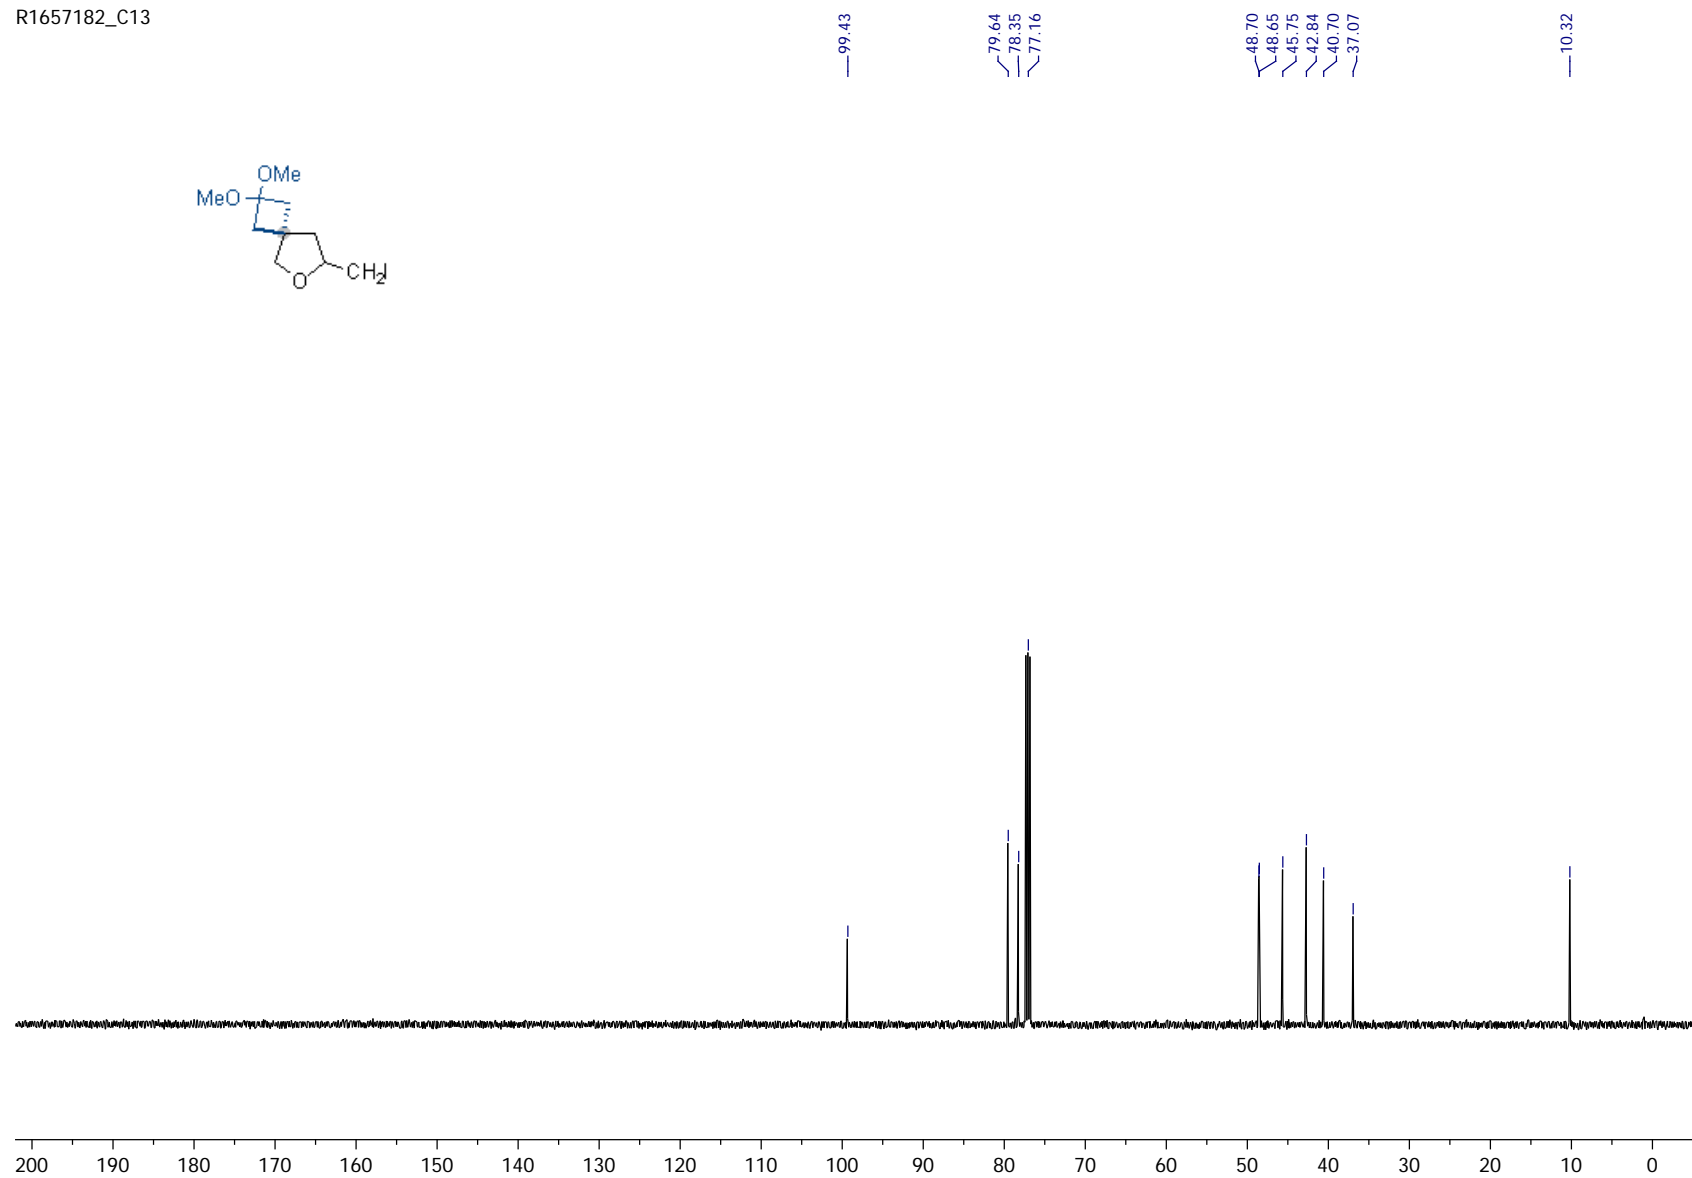

Compound 8a

R729388

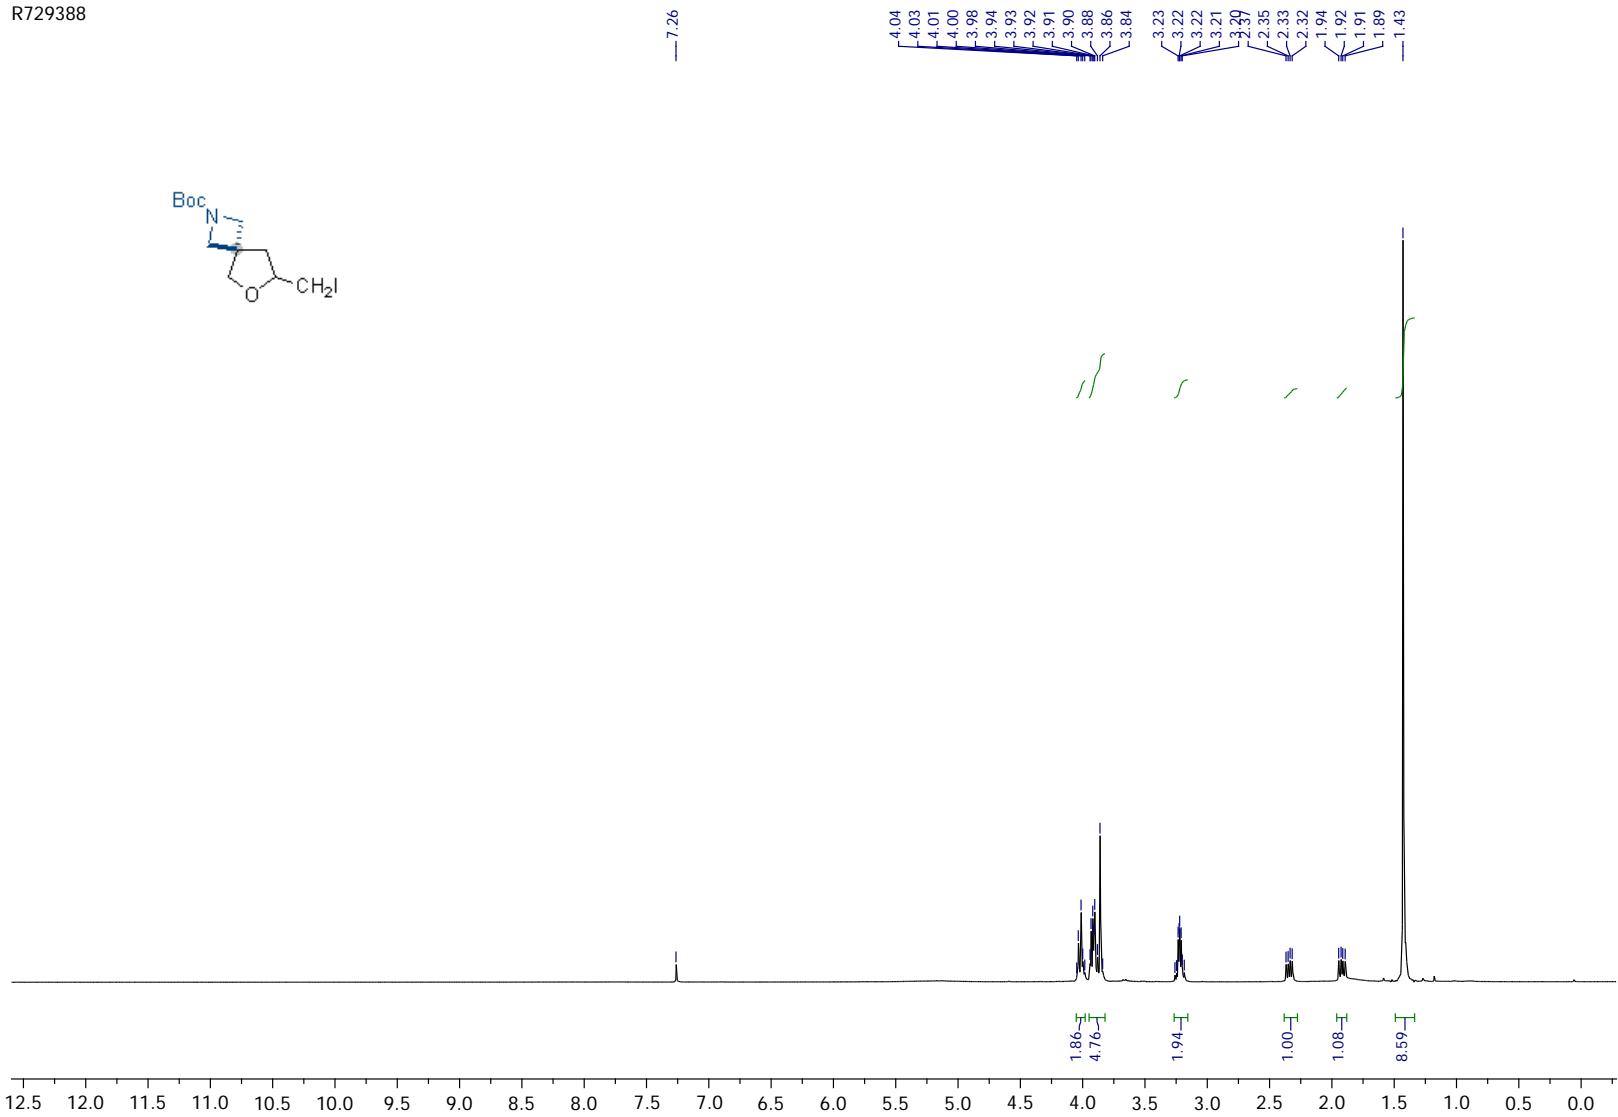

R729388\_C13

—156.29

79.89  
78.33  
77.75  
77.16

59.66  
58.23

43.77  
41.03

—28.49

—9.67

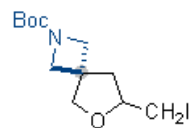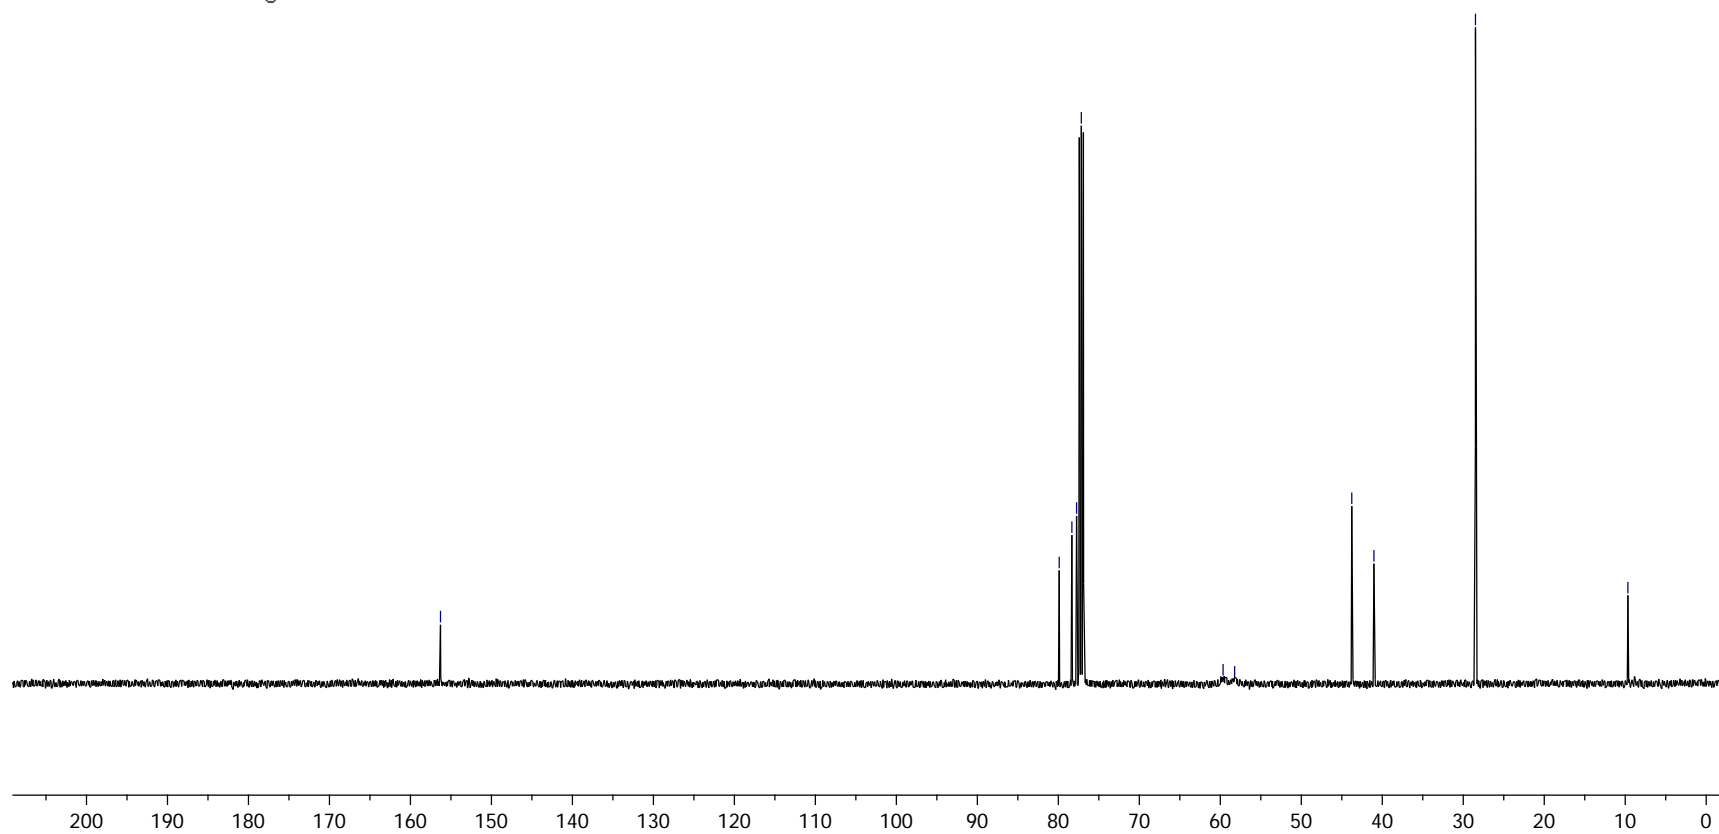



Compound 9a

R1680731

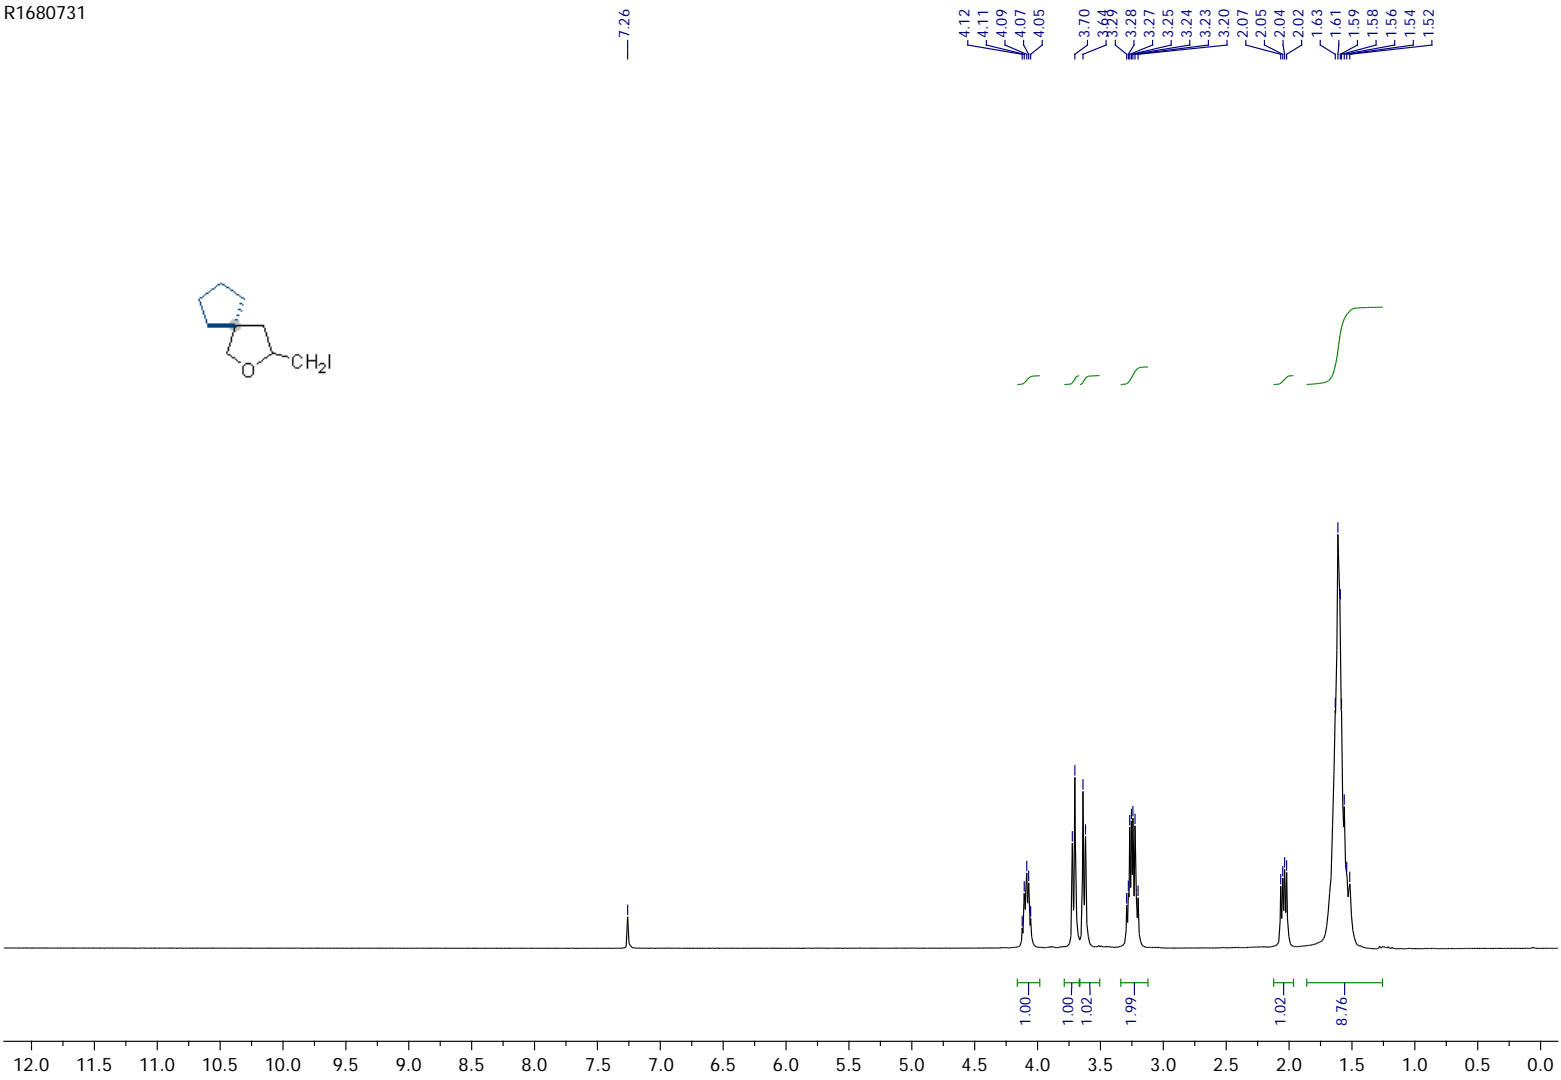

R1680731\_13C

|||||

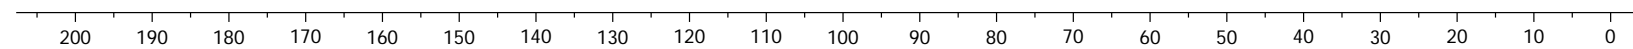

Compound 10a

R863253

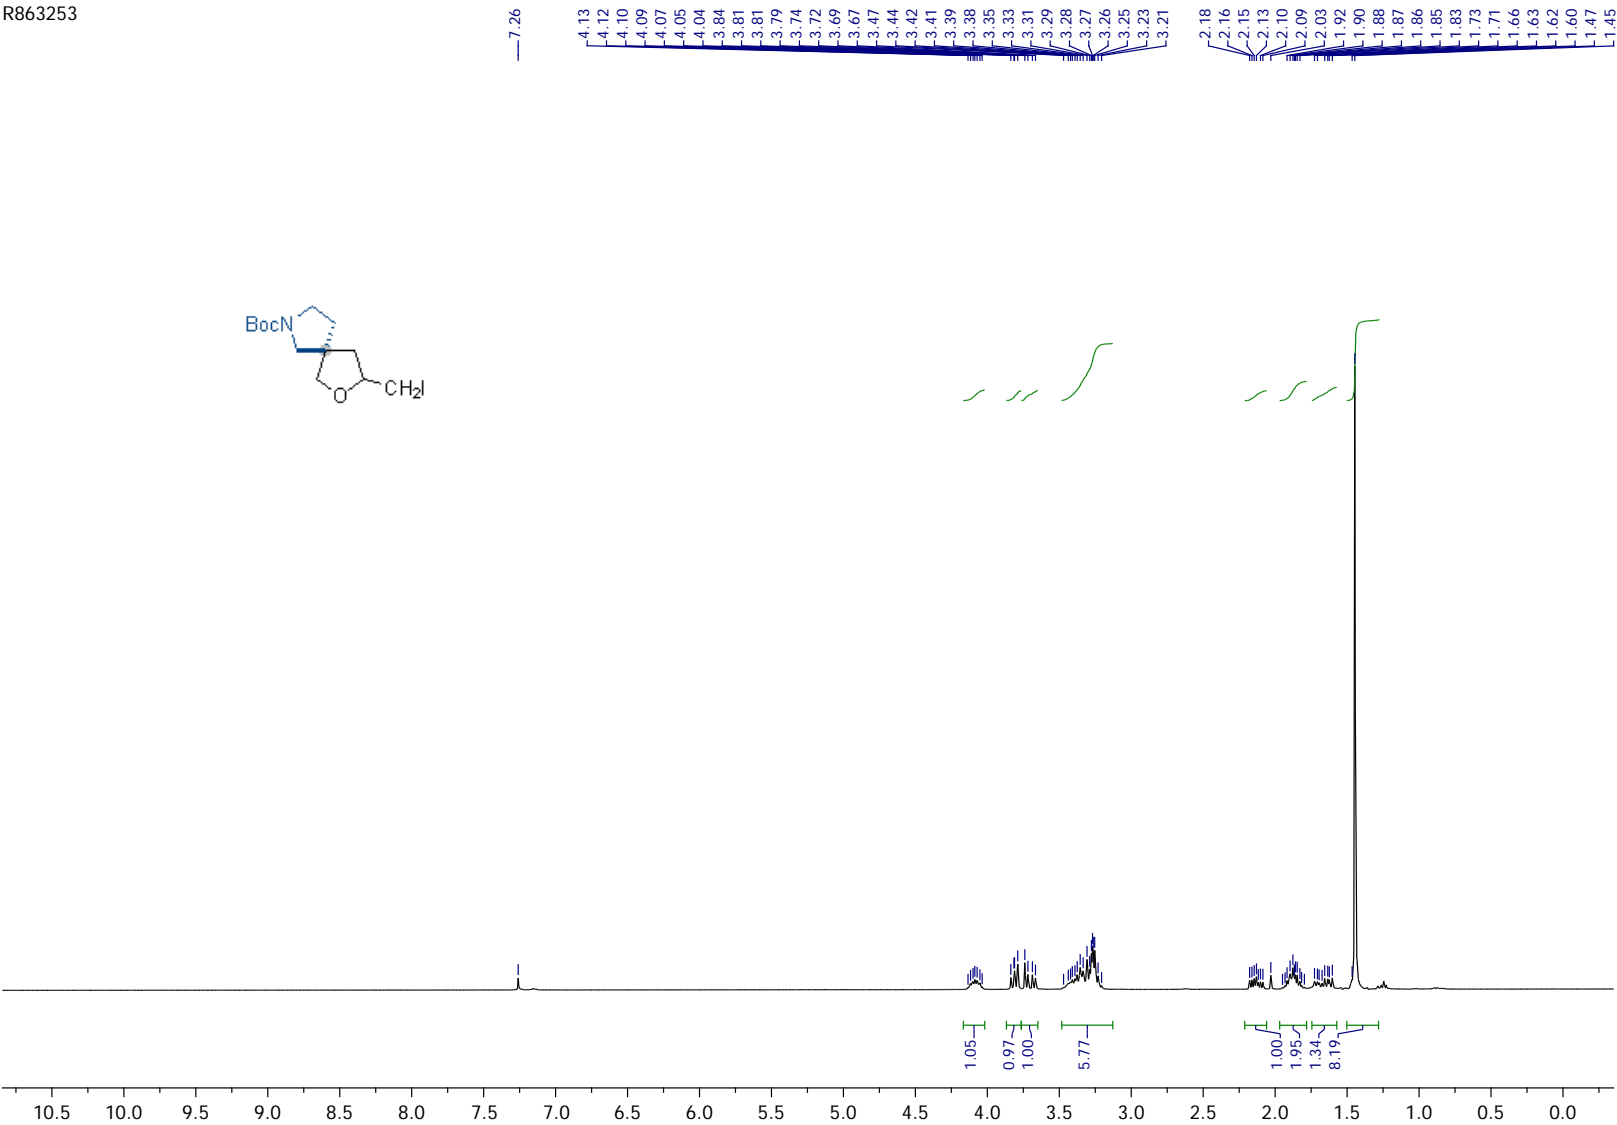

R863253\_C13

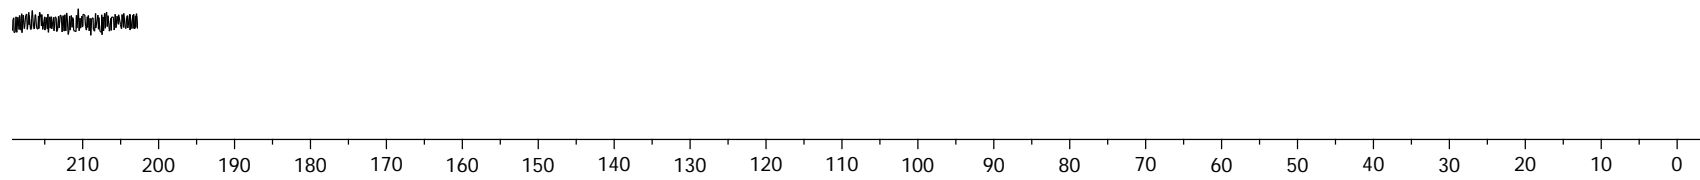

Compound 11a

R1681268

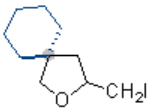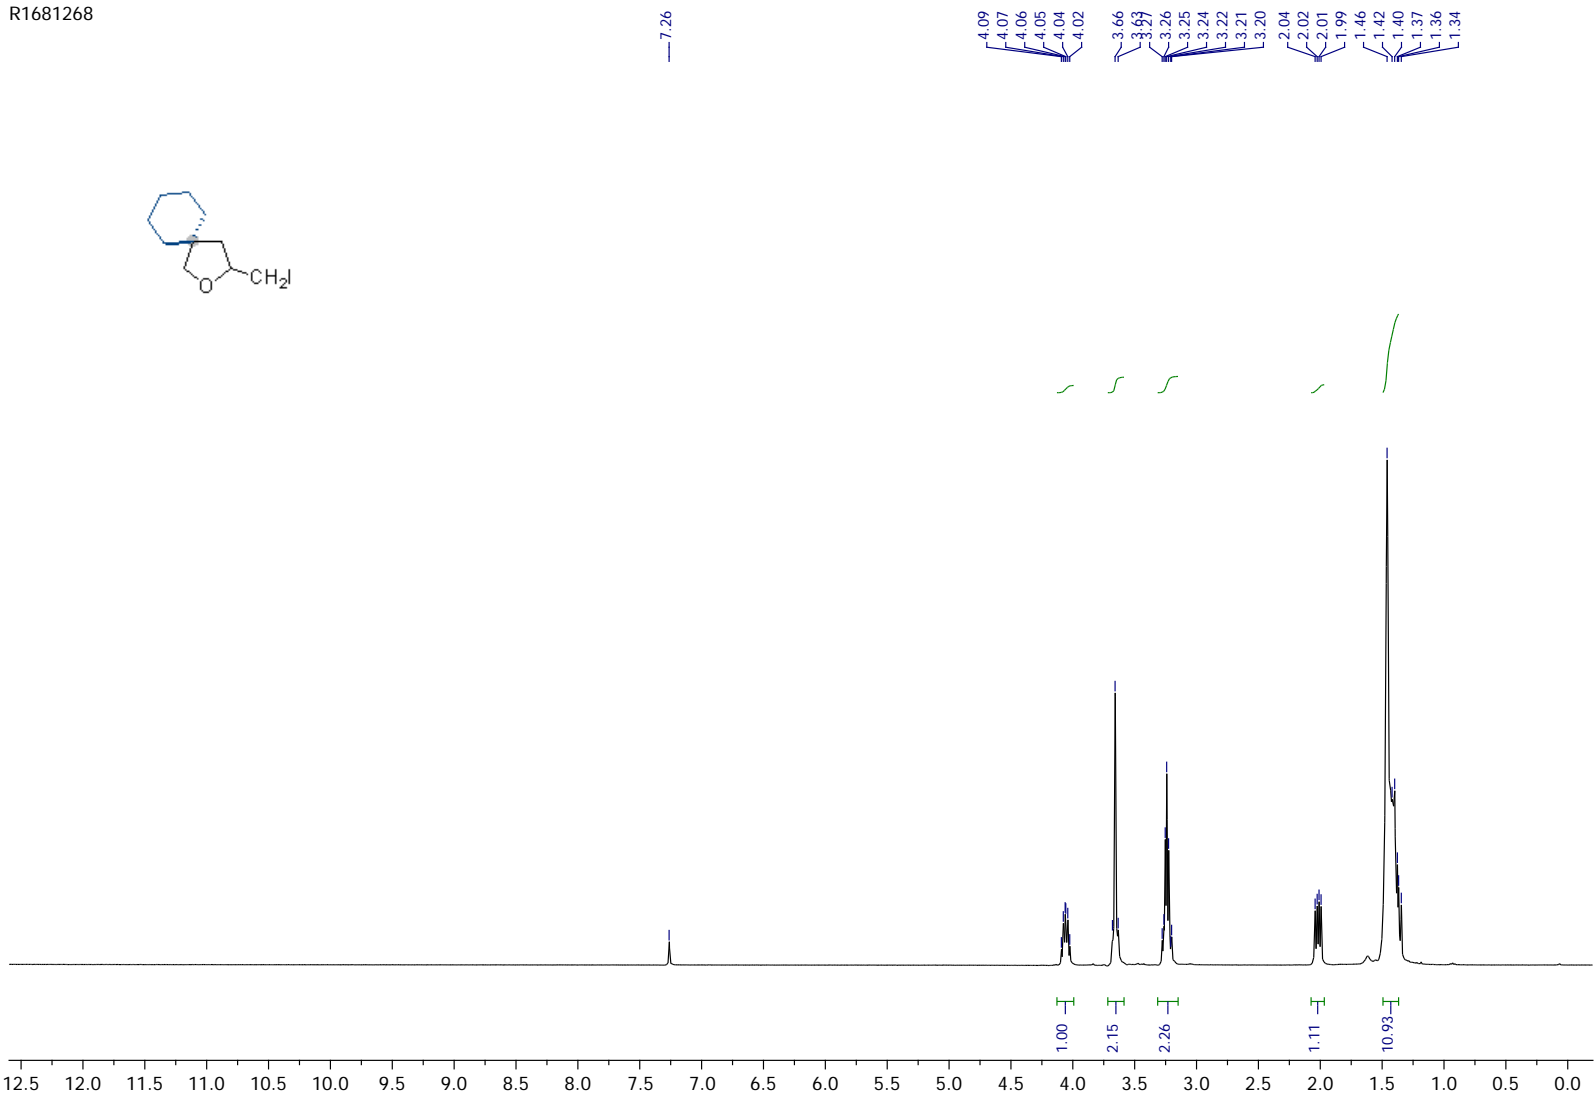

R1681268\_C13

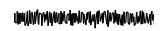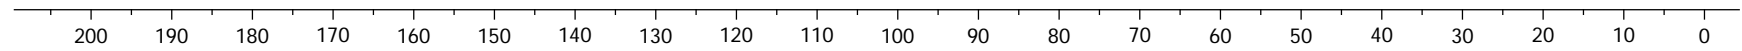

Compound 12a

R1711357

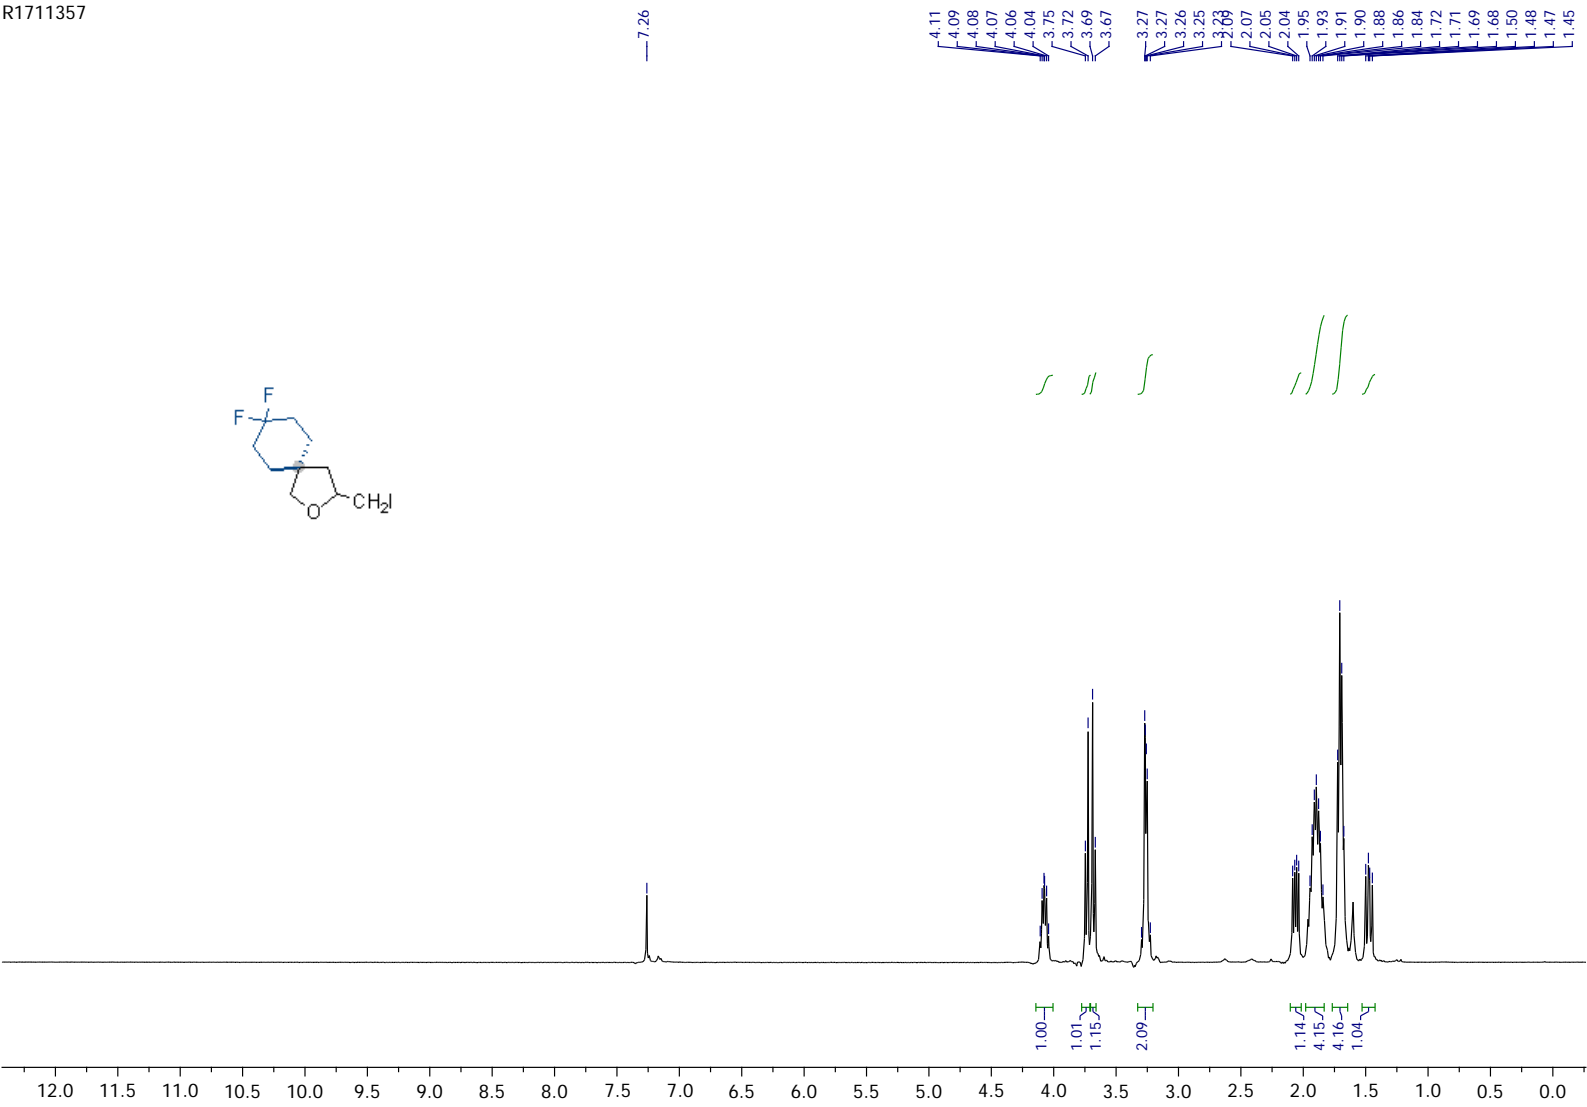

R1711357\_C13

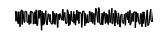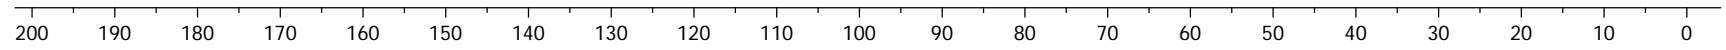



R1711357\_F19{H}

-98.26

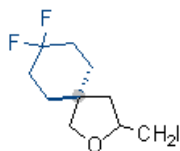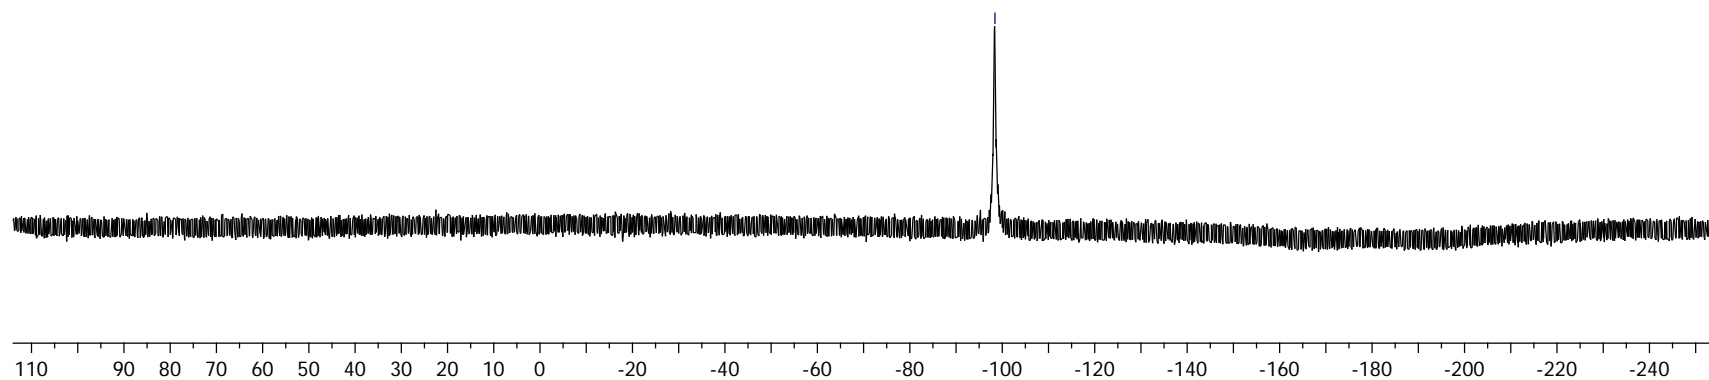

### Compound 13a

R773362

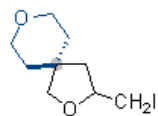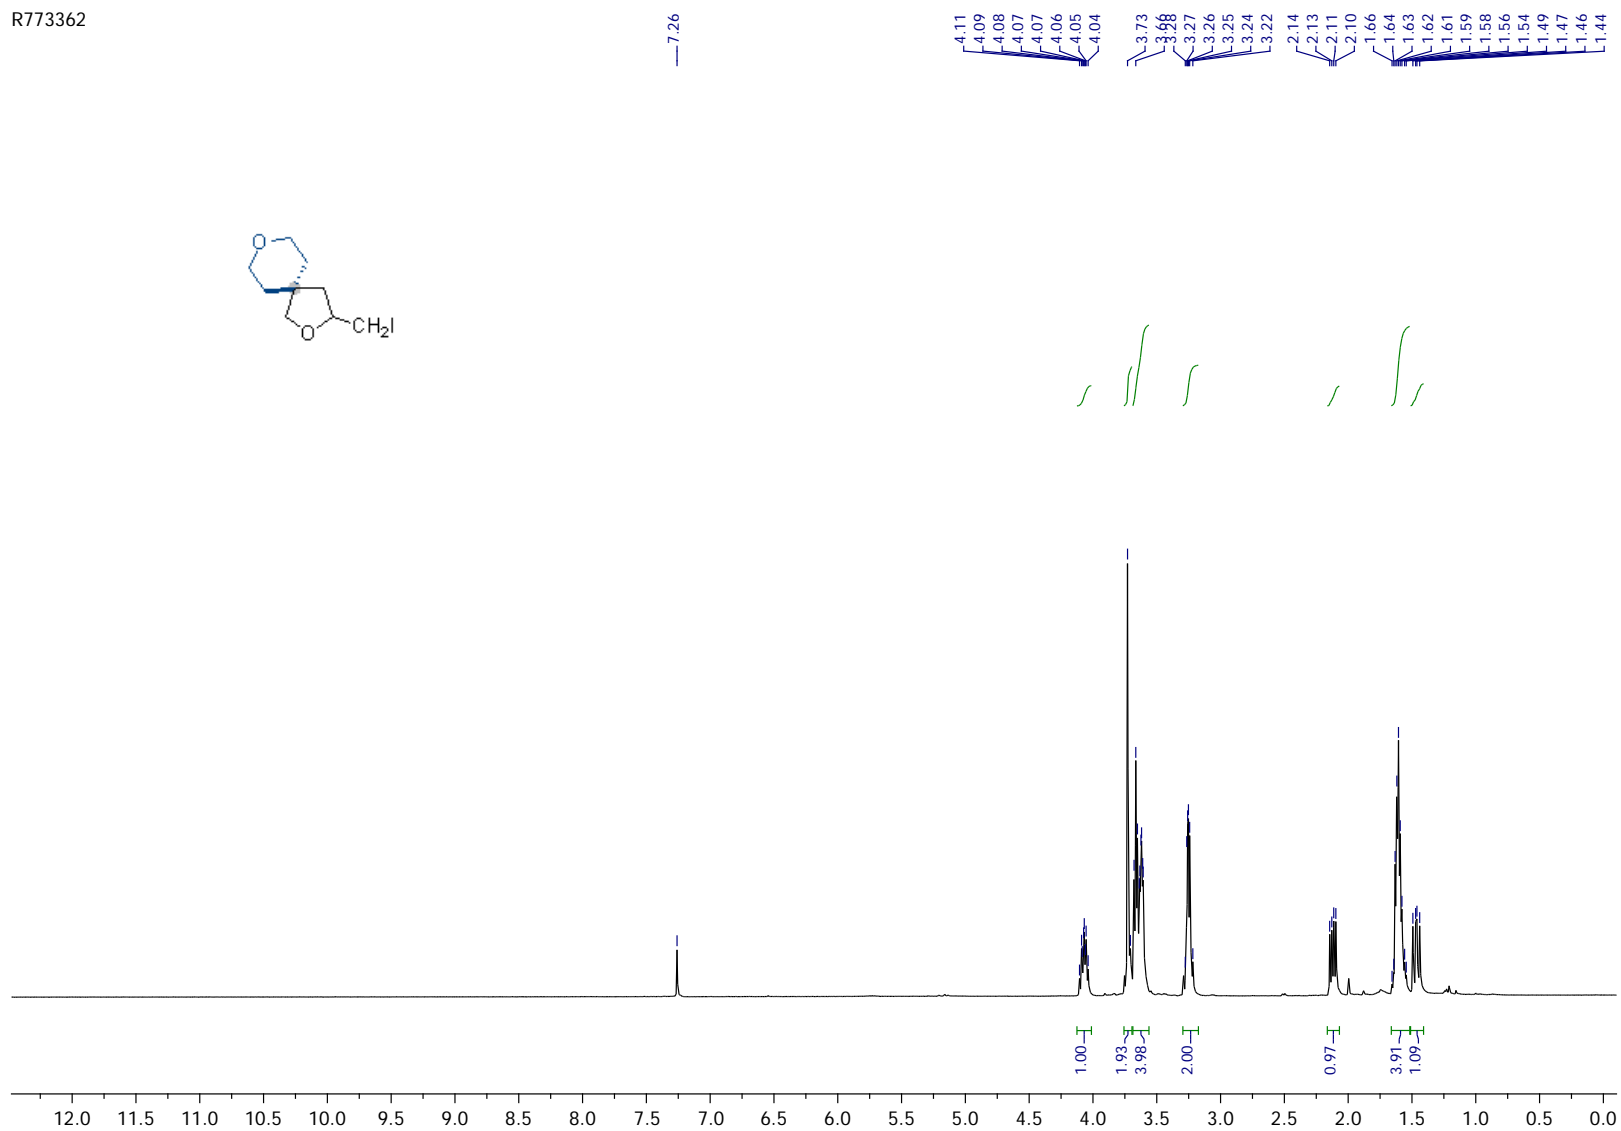

R773362\_C13

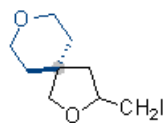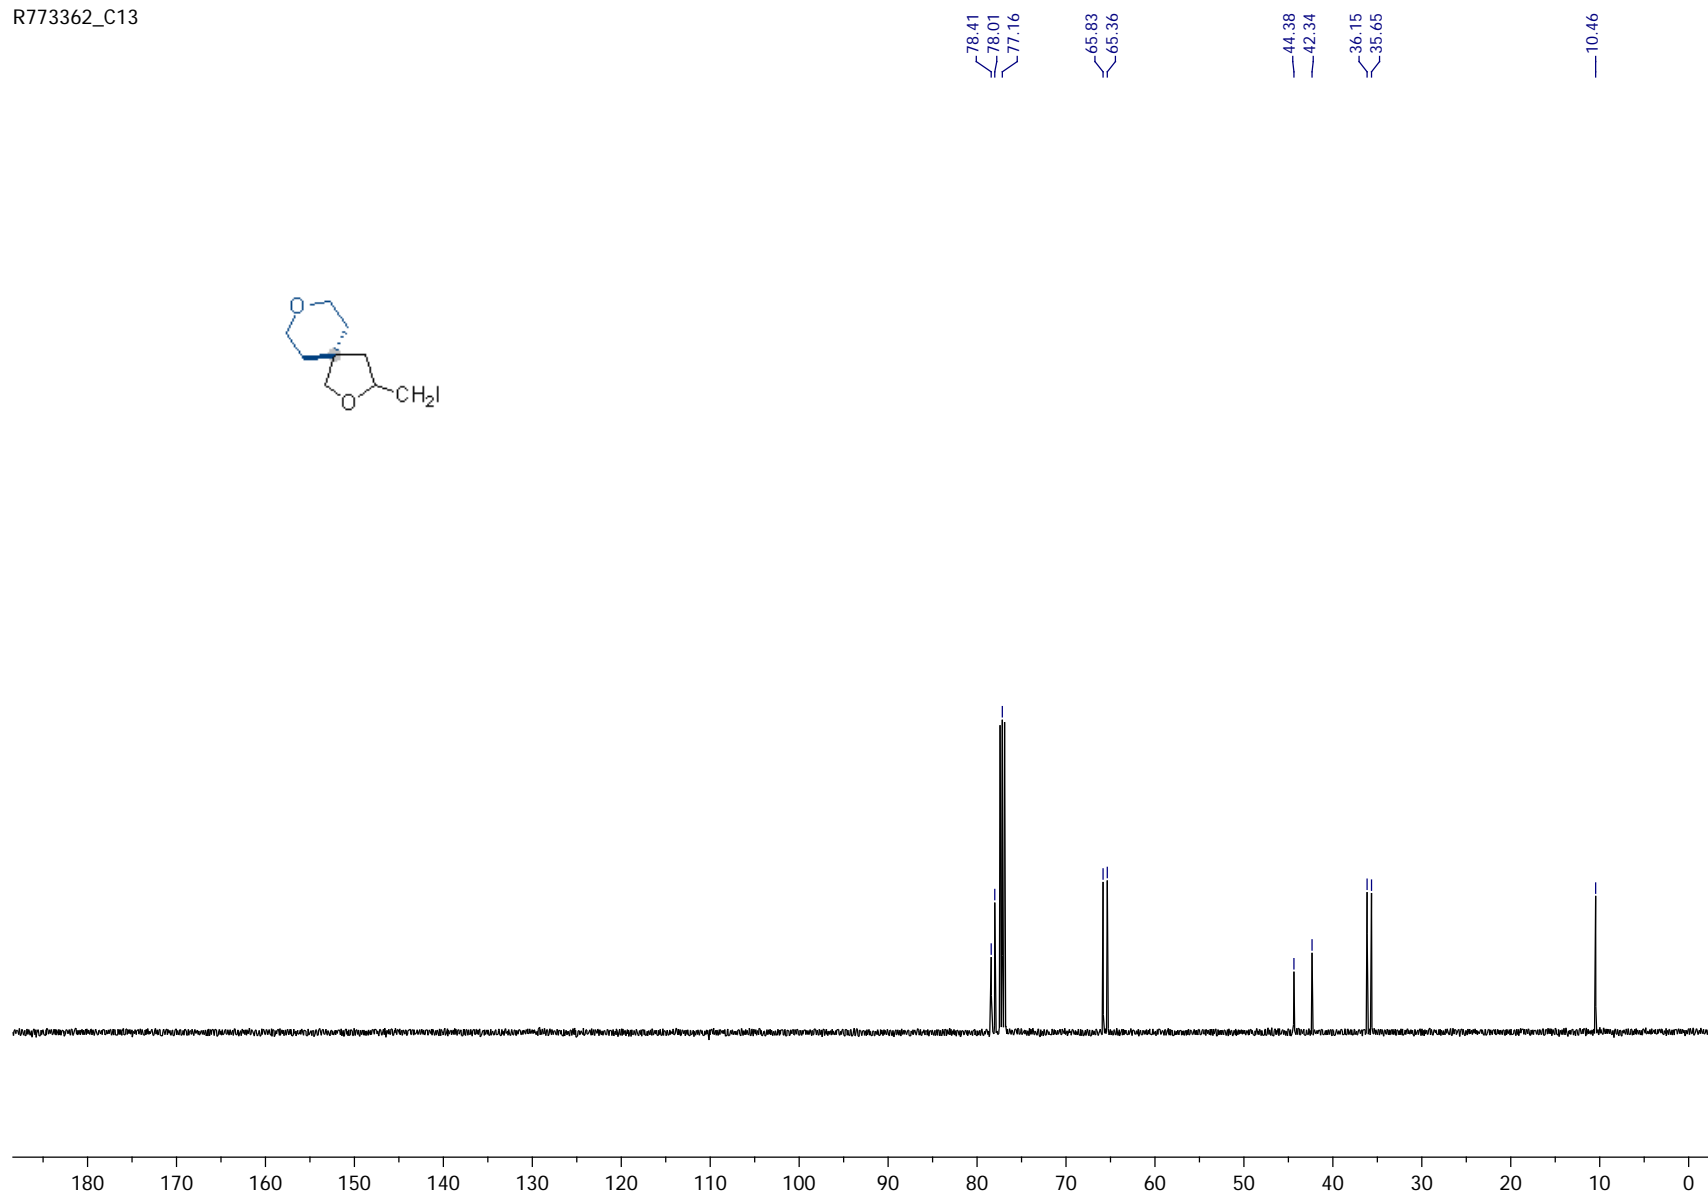

Compound 14a

R793038

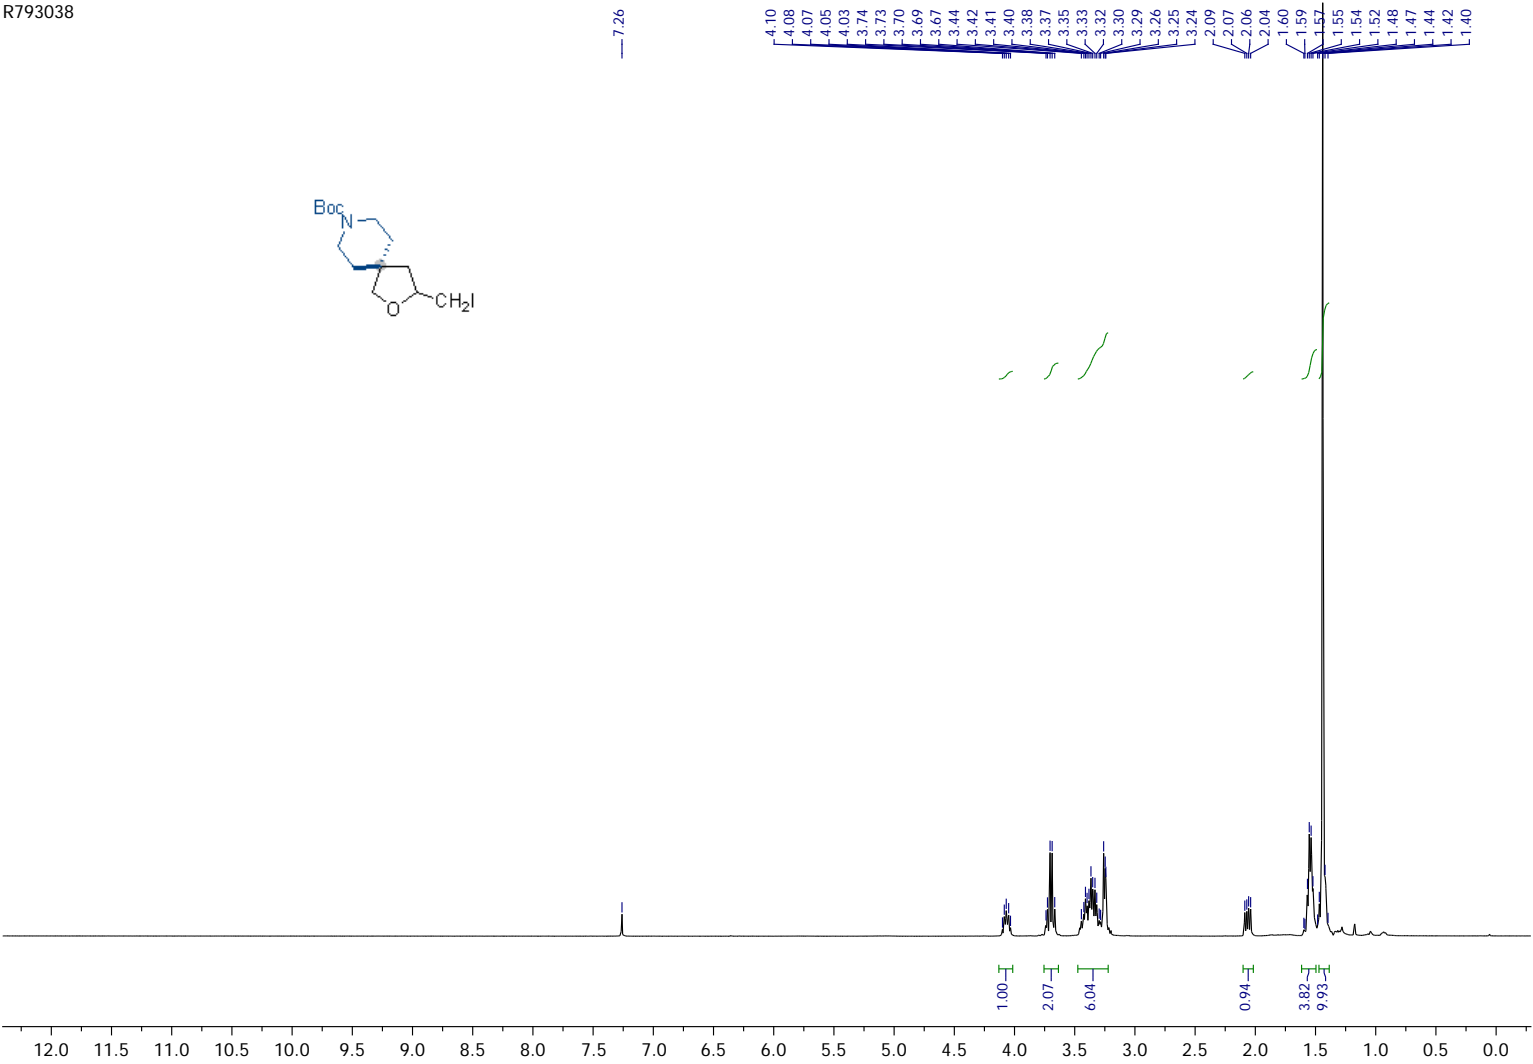

R793038\_C13

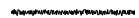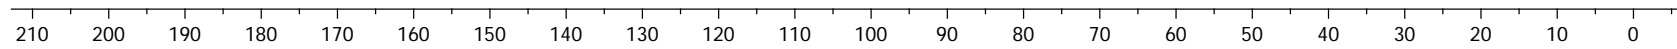

# Compound 15a

R957114\_T

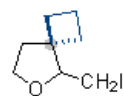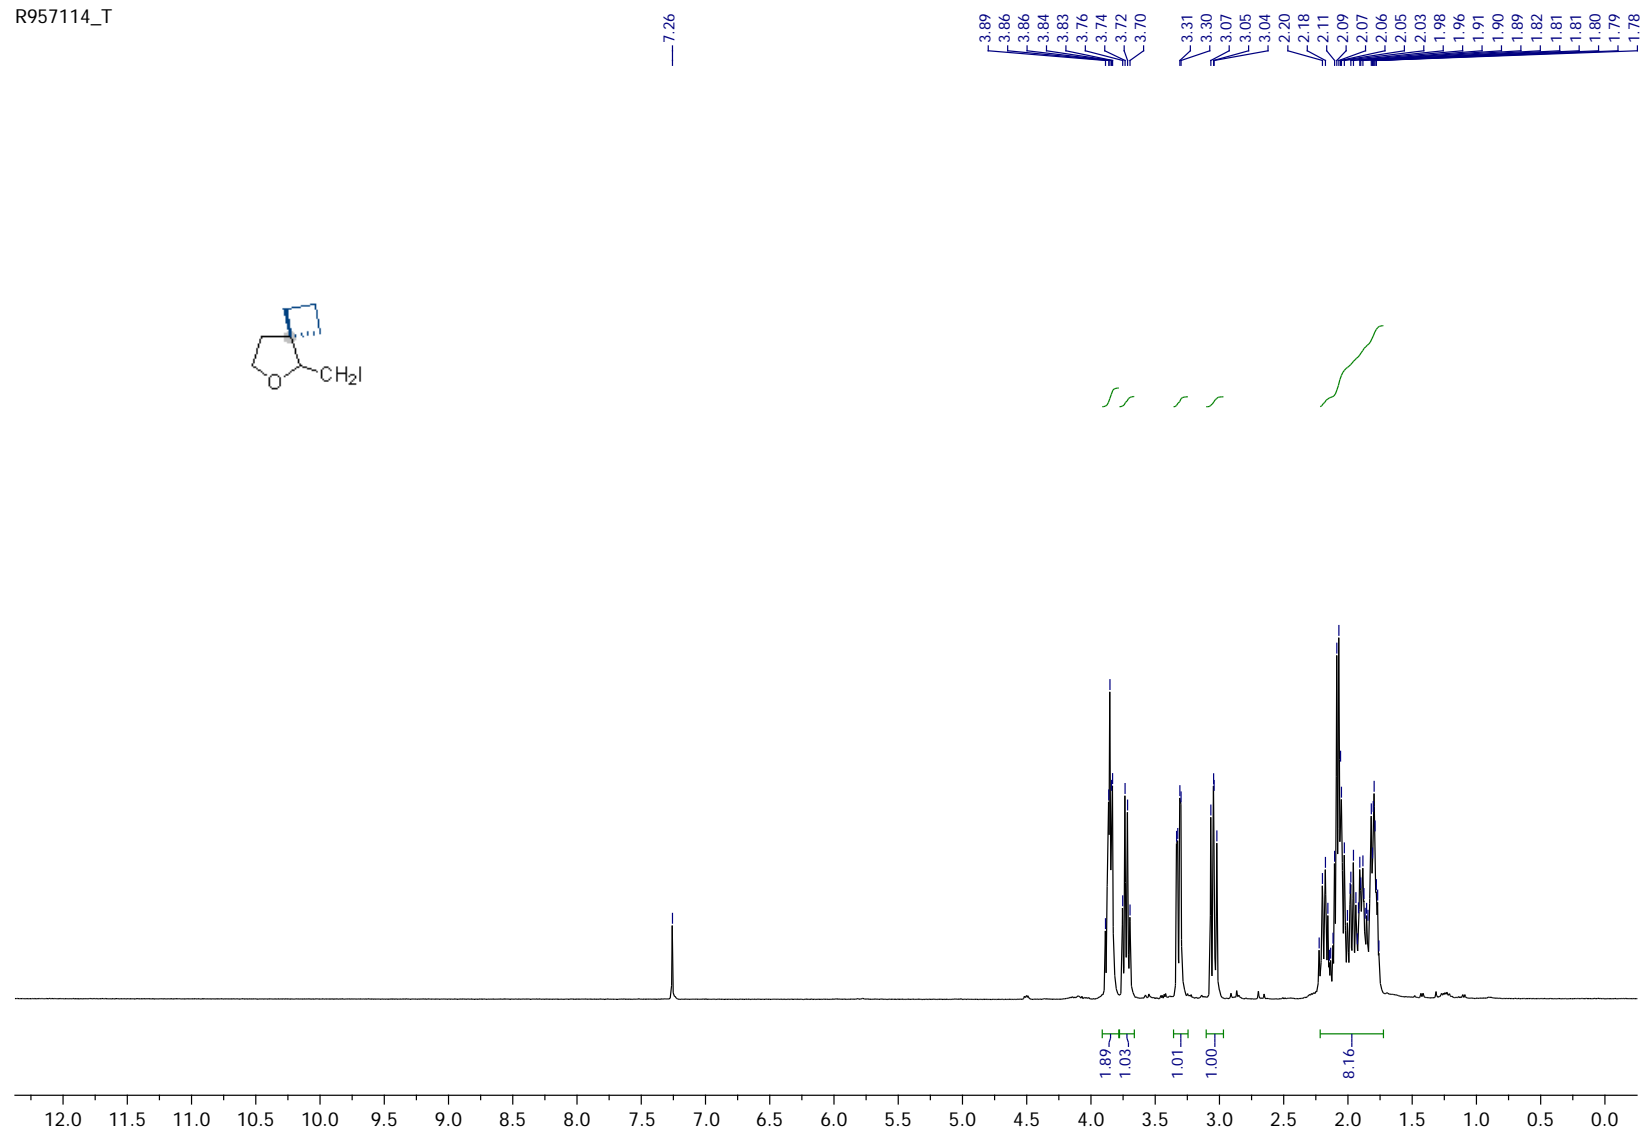

R957114\_C13\_T

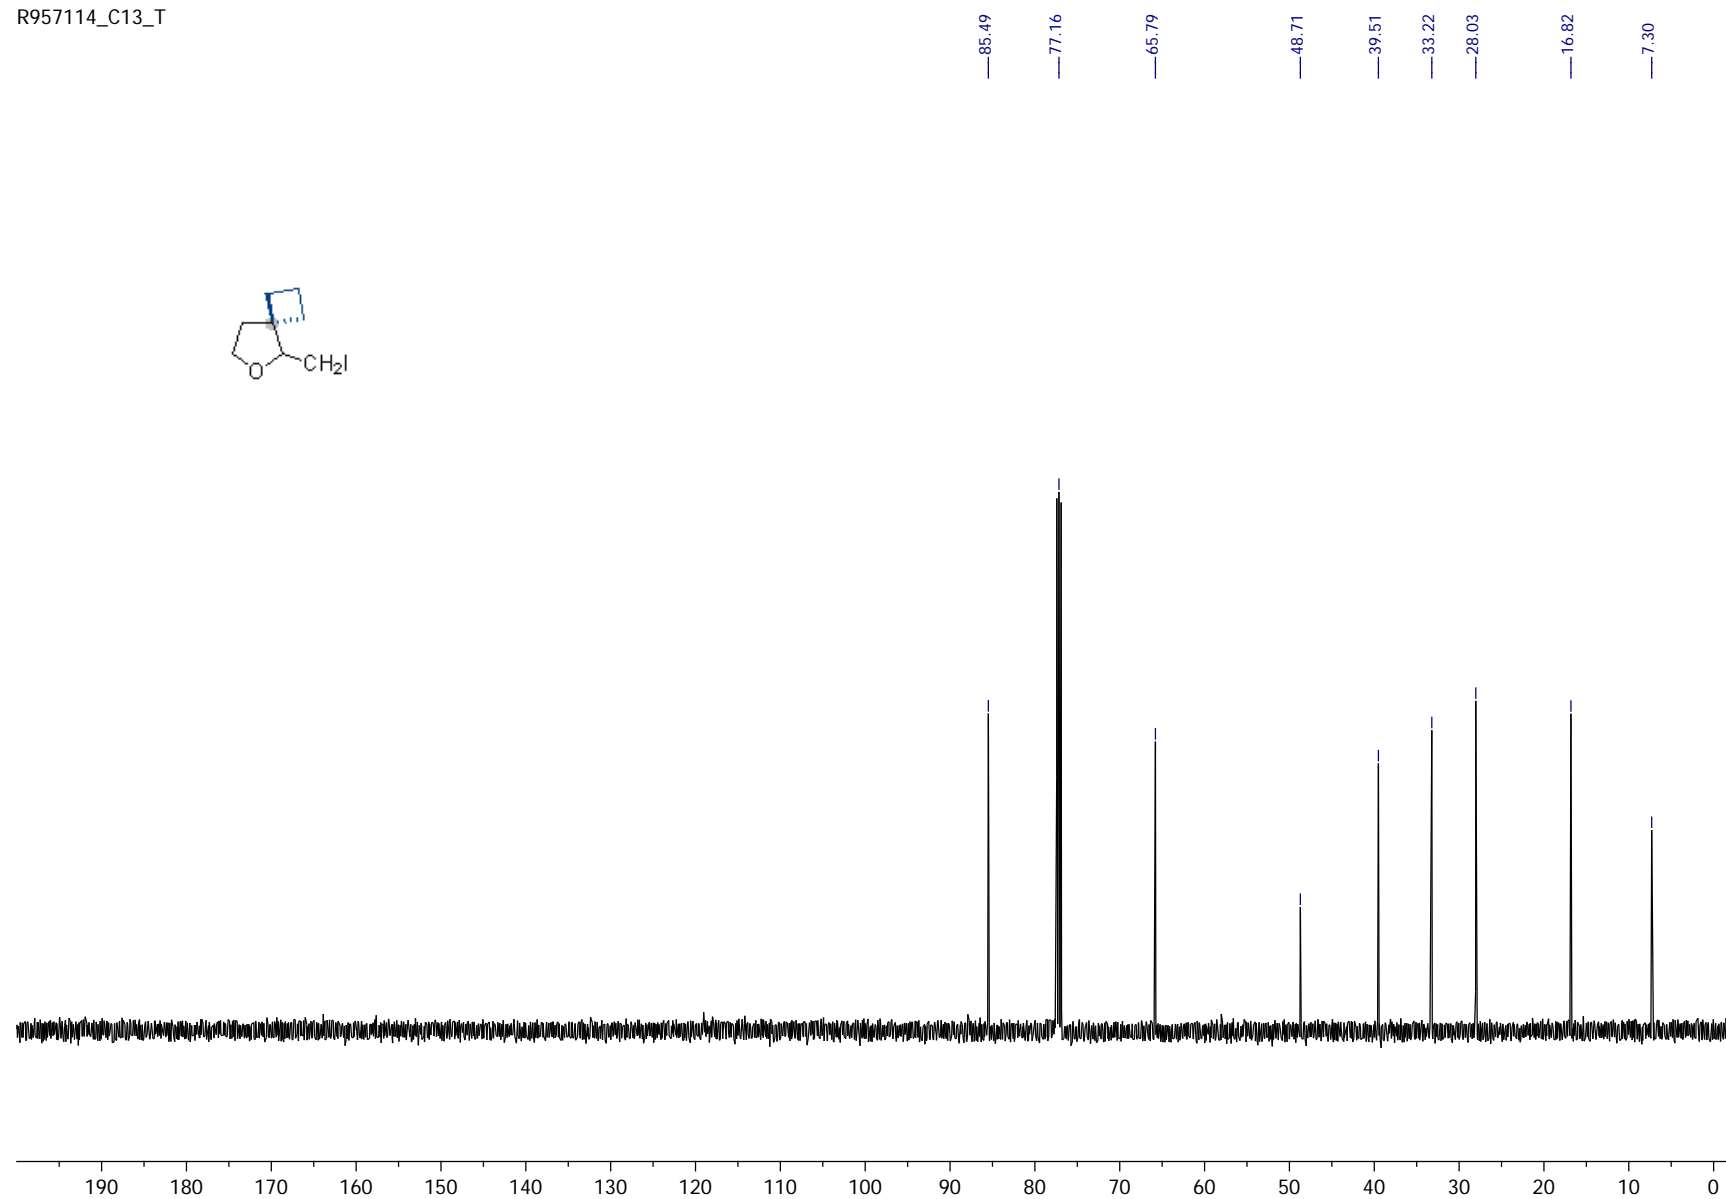

### Compound 16a

R1088646

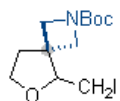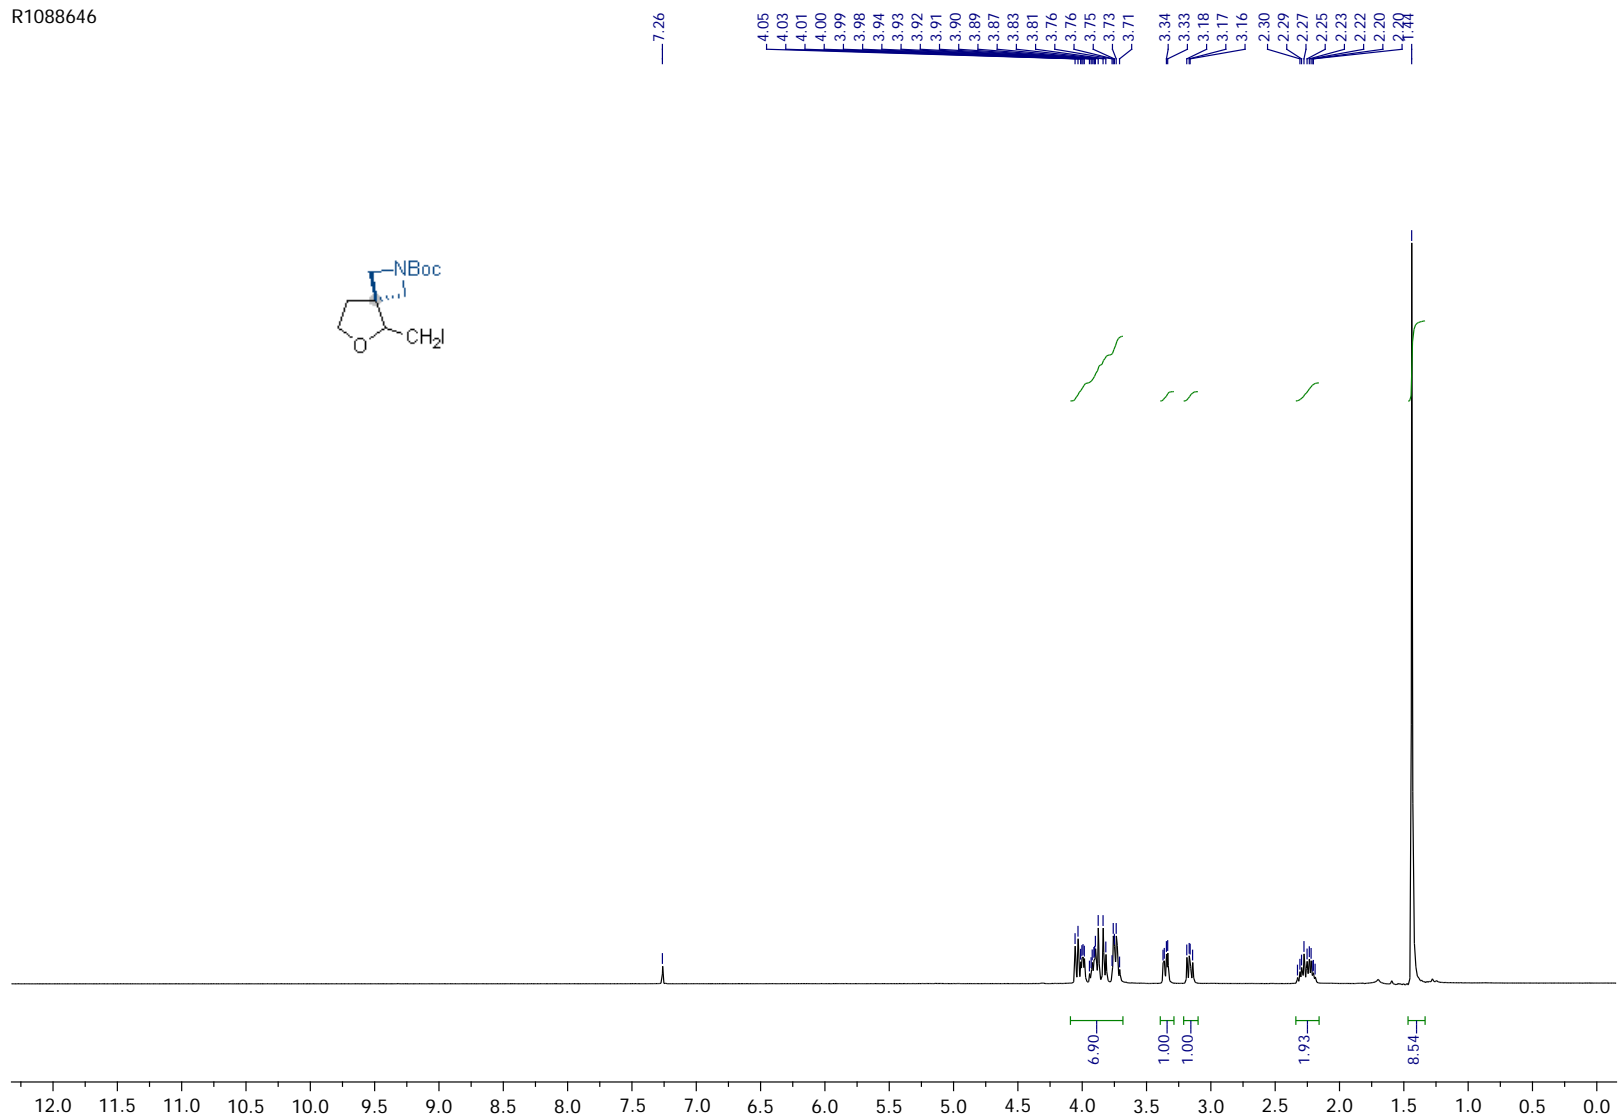





Compound 17a

R1180515

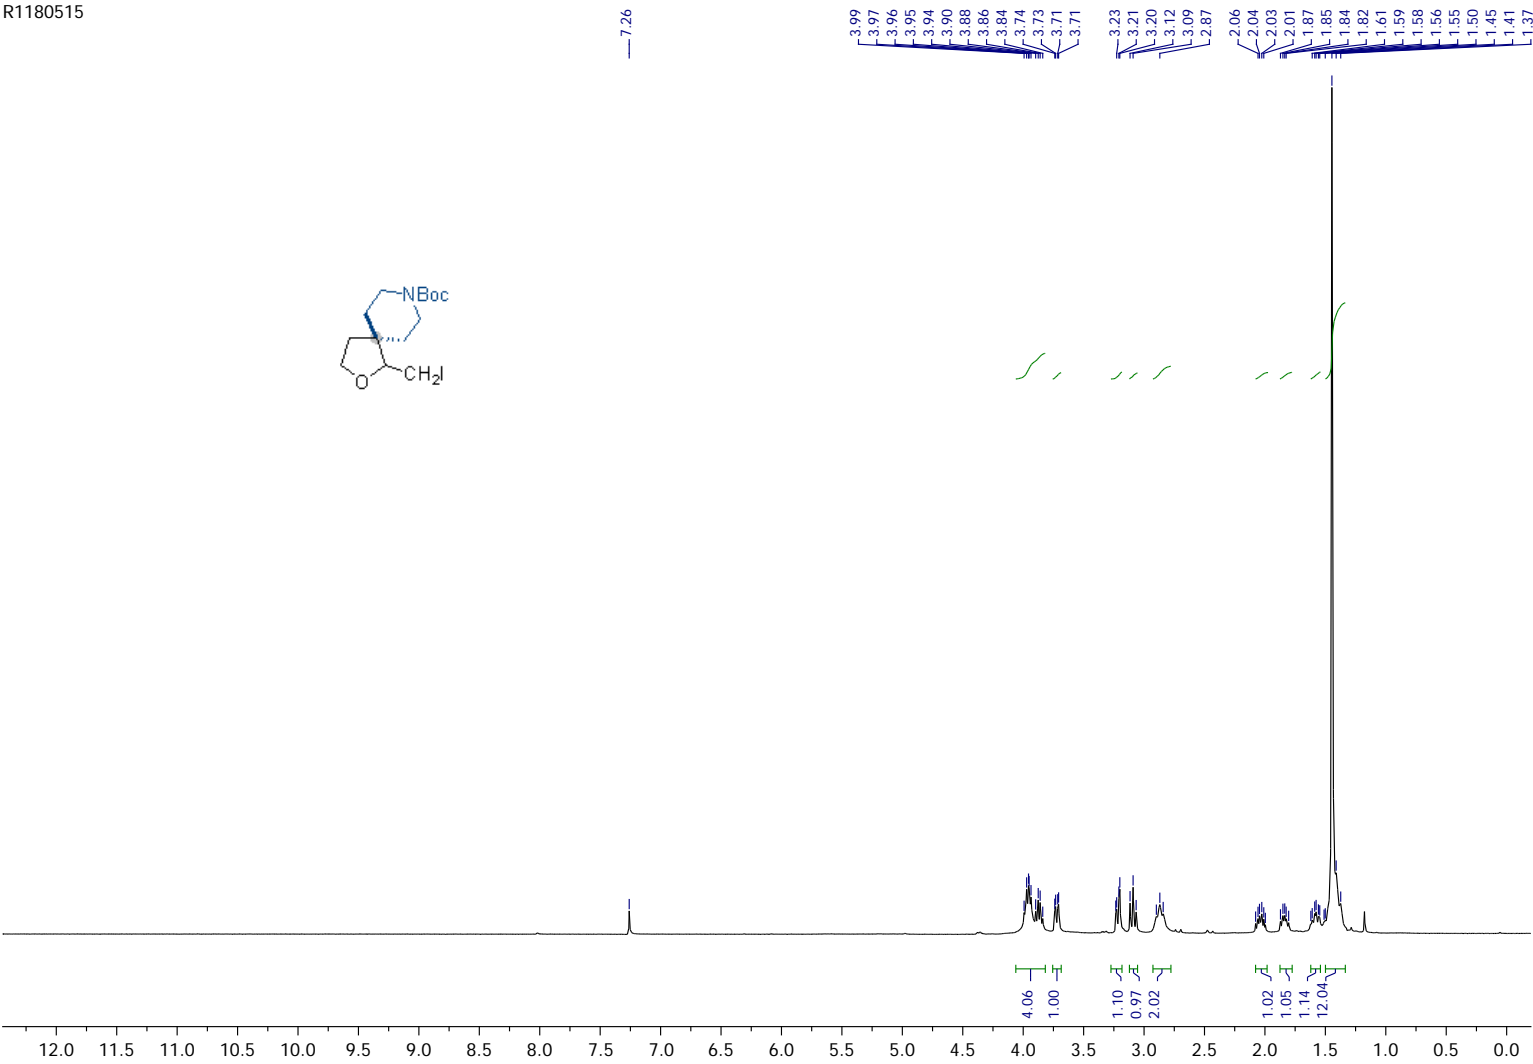

R1180515\_C13

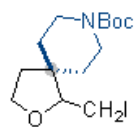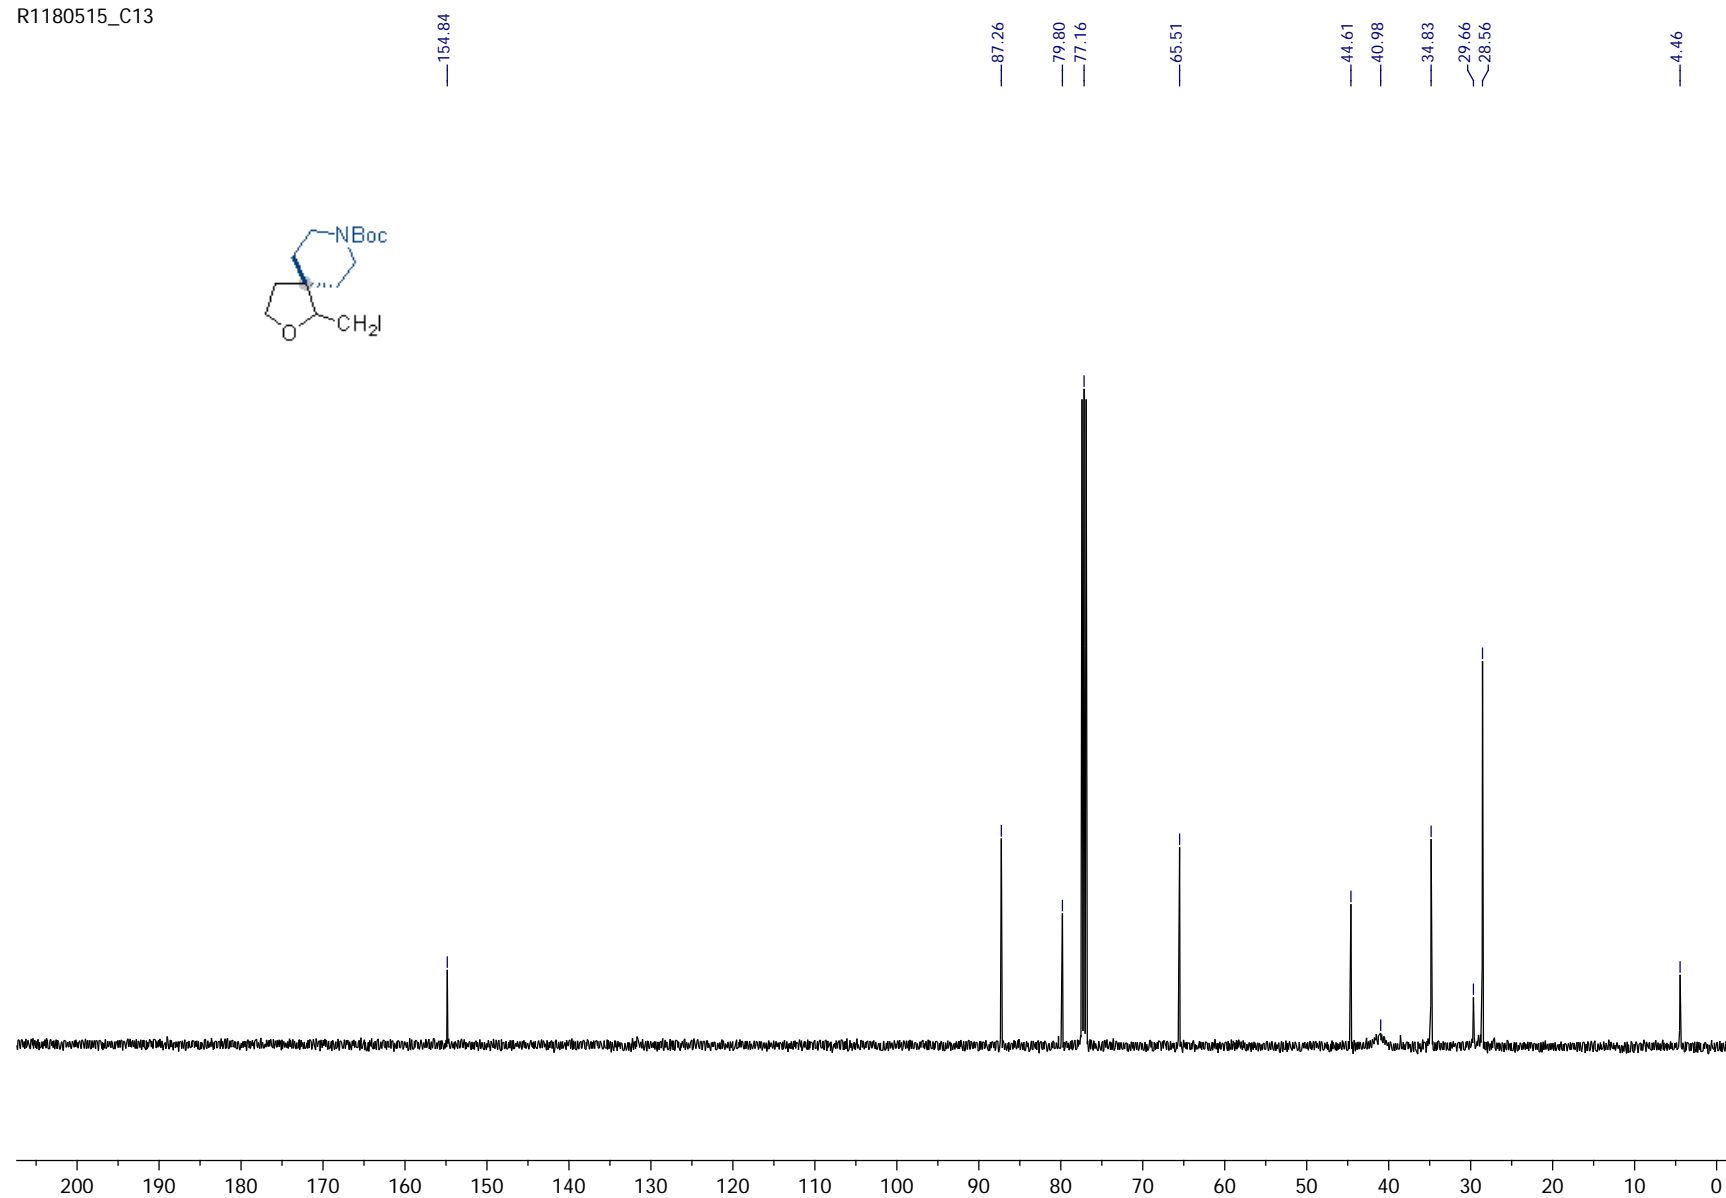

# Compound 18a

R811690

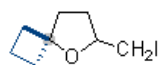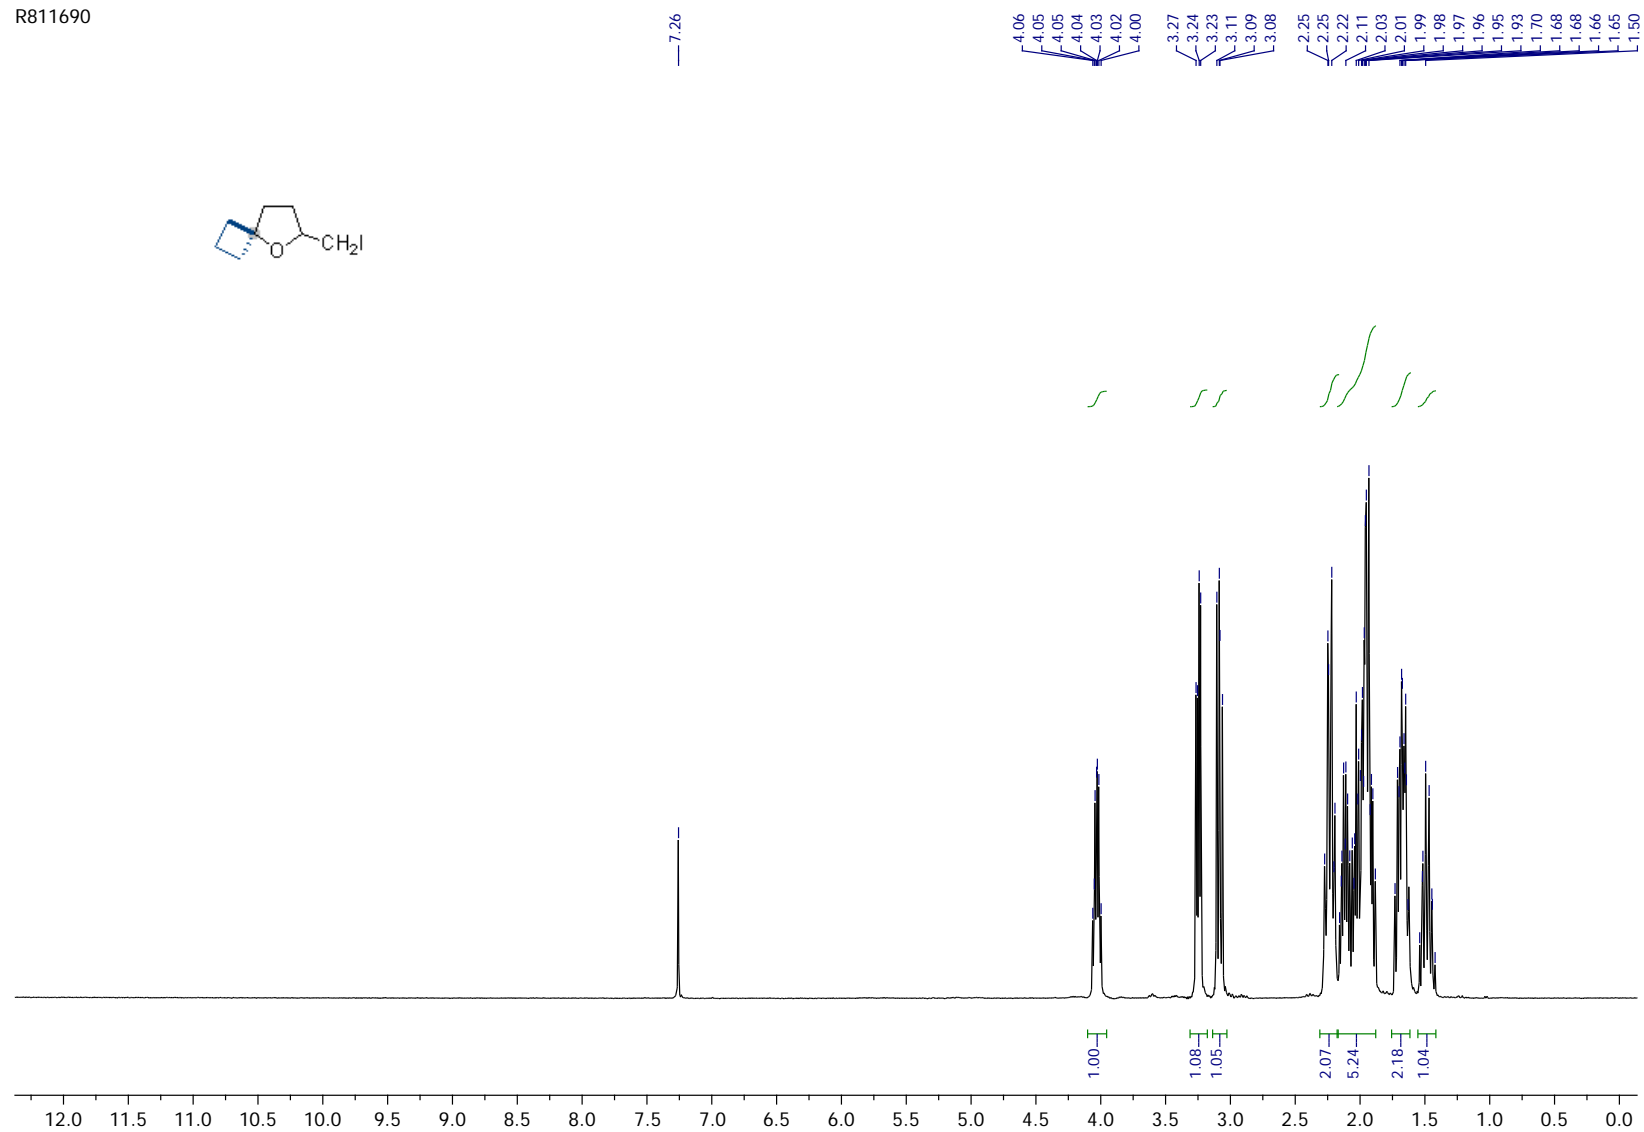

R811690\_C13

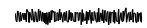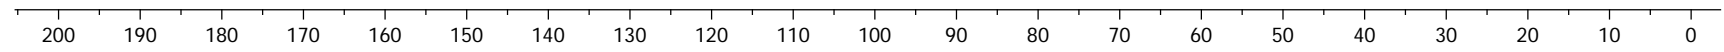

Compound 19a

R1686590

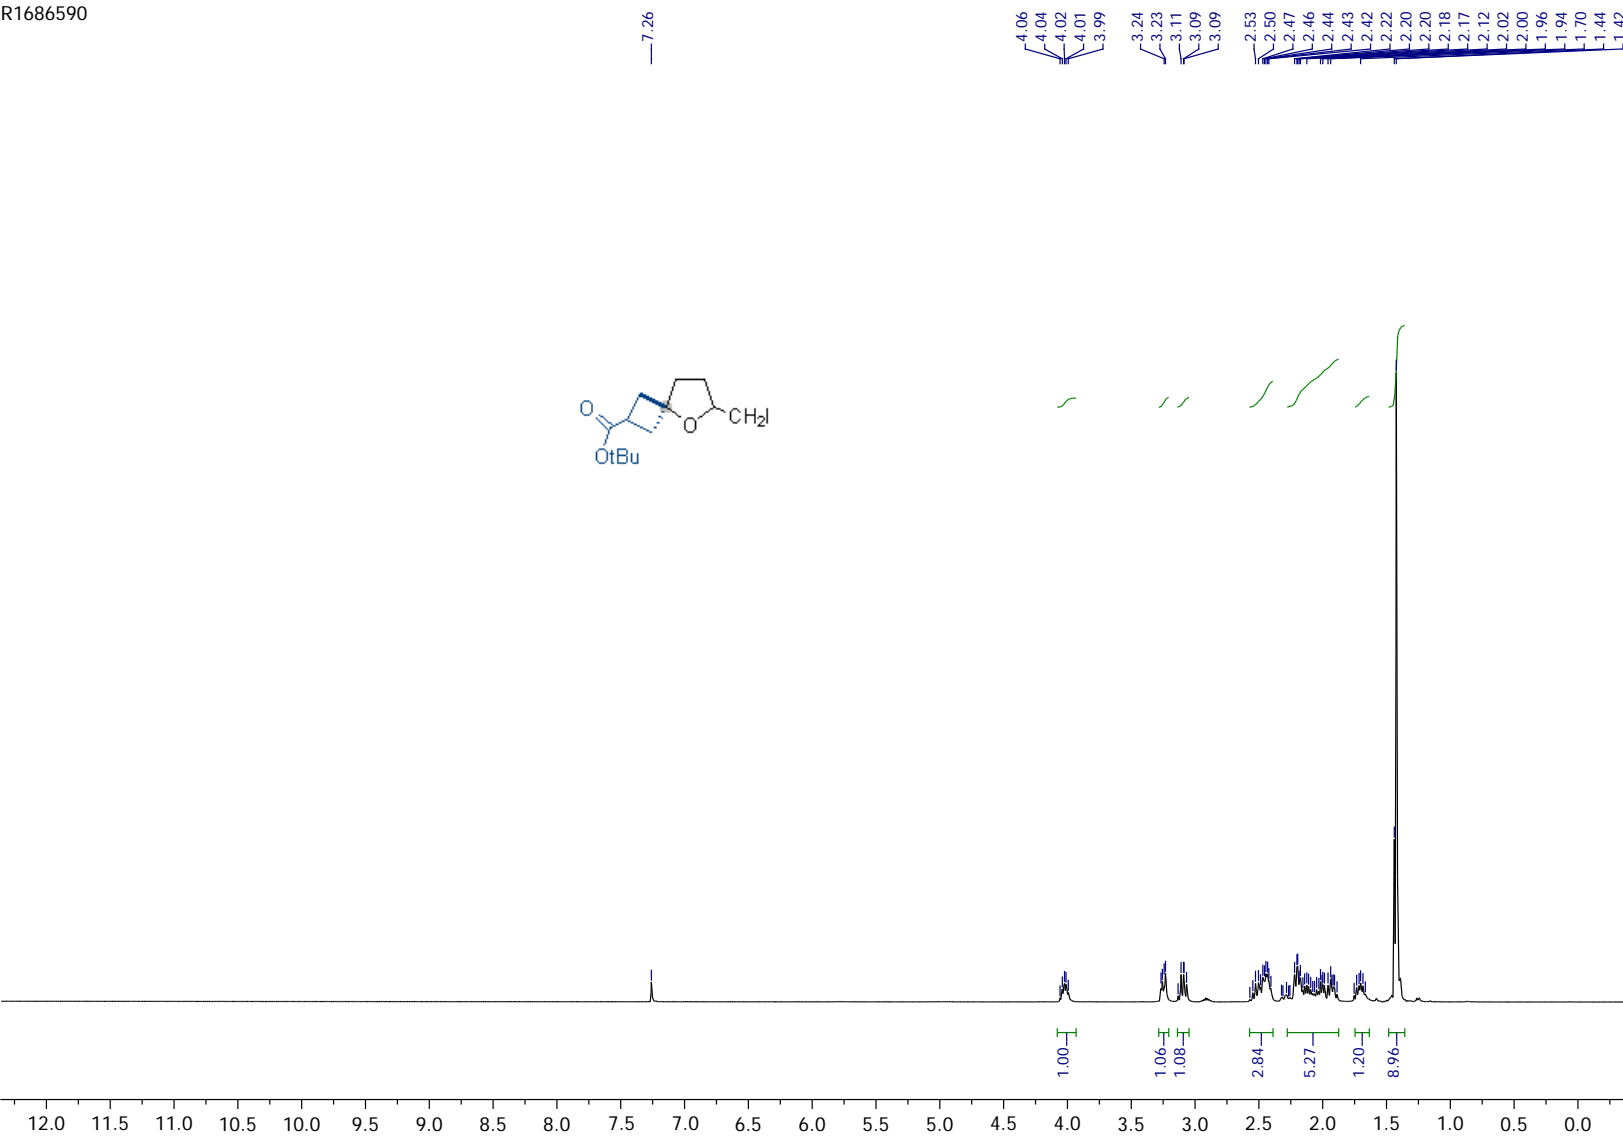

R1686590\_C13

XXXXXXXXXXXXXXXXXXXX

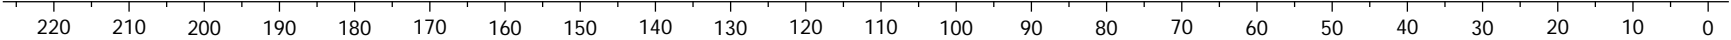

# Compound 20a

R893859

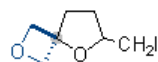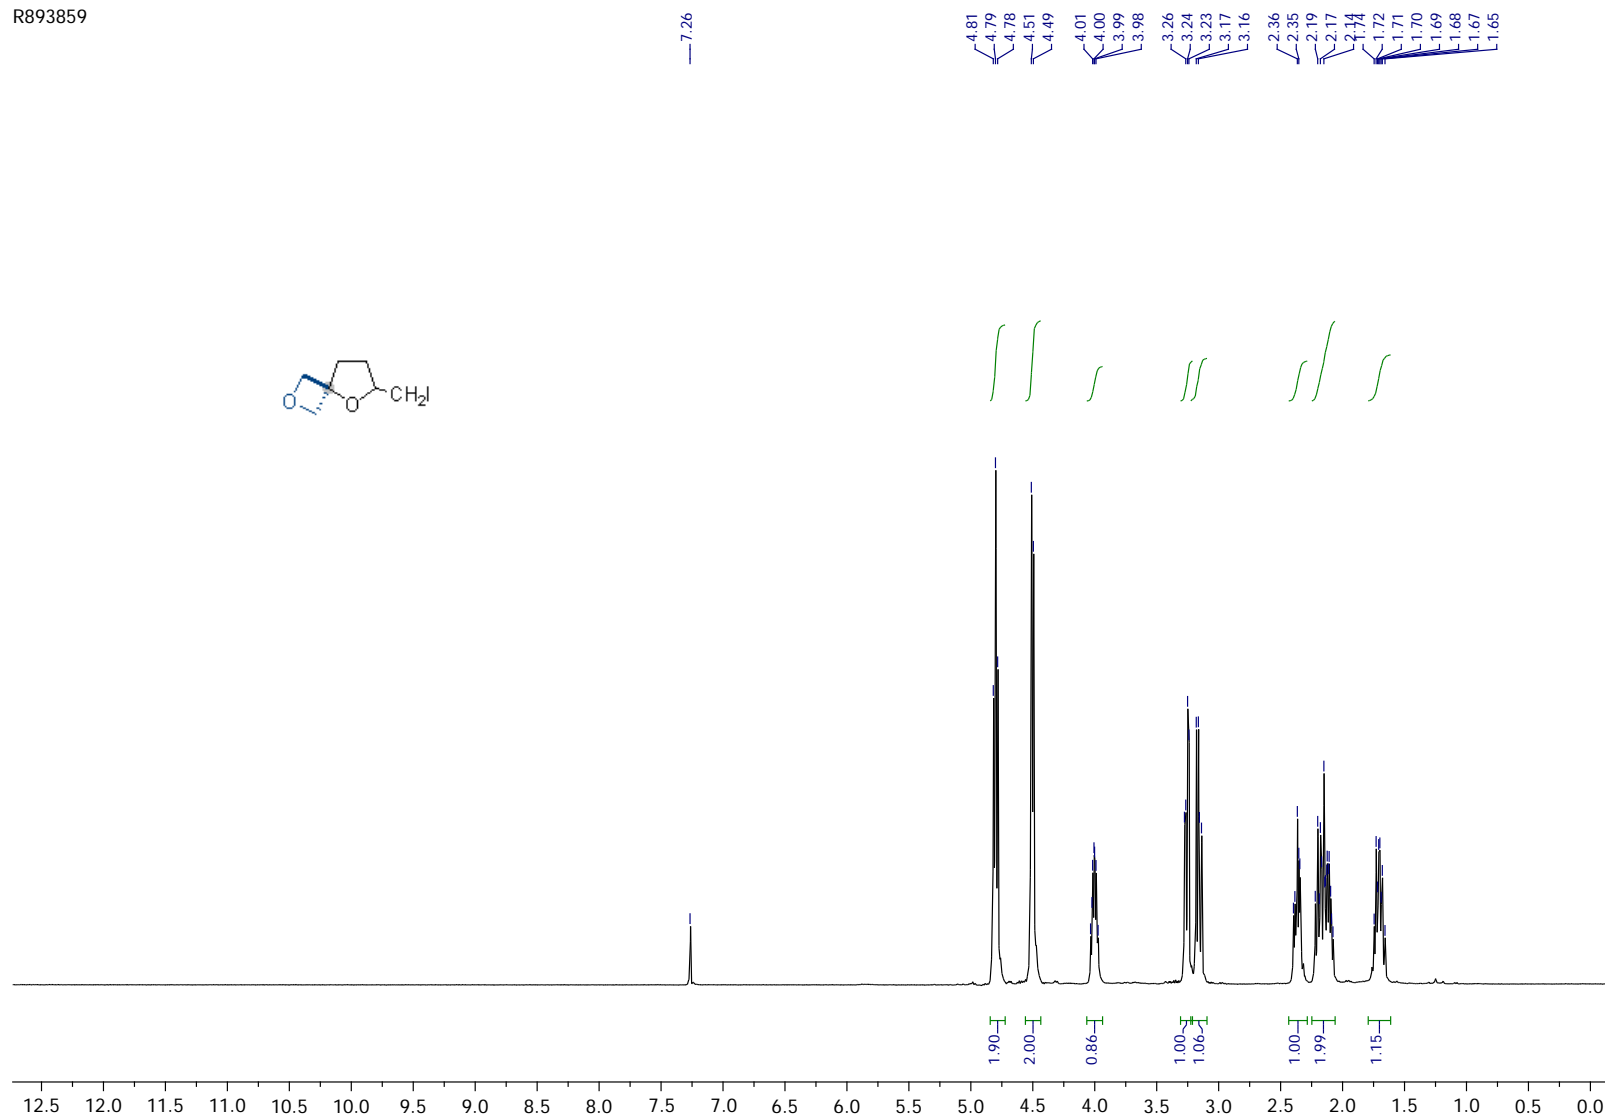





Compound 21a

R658736

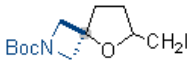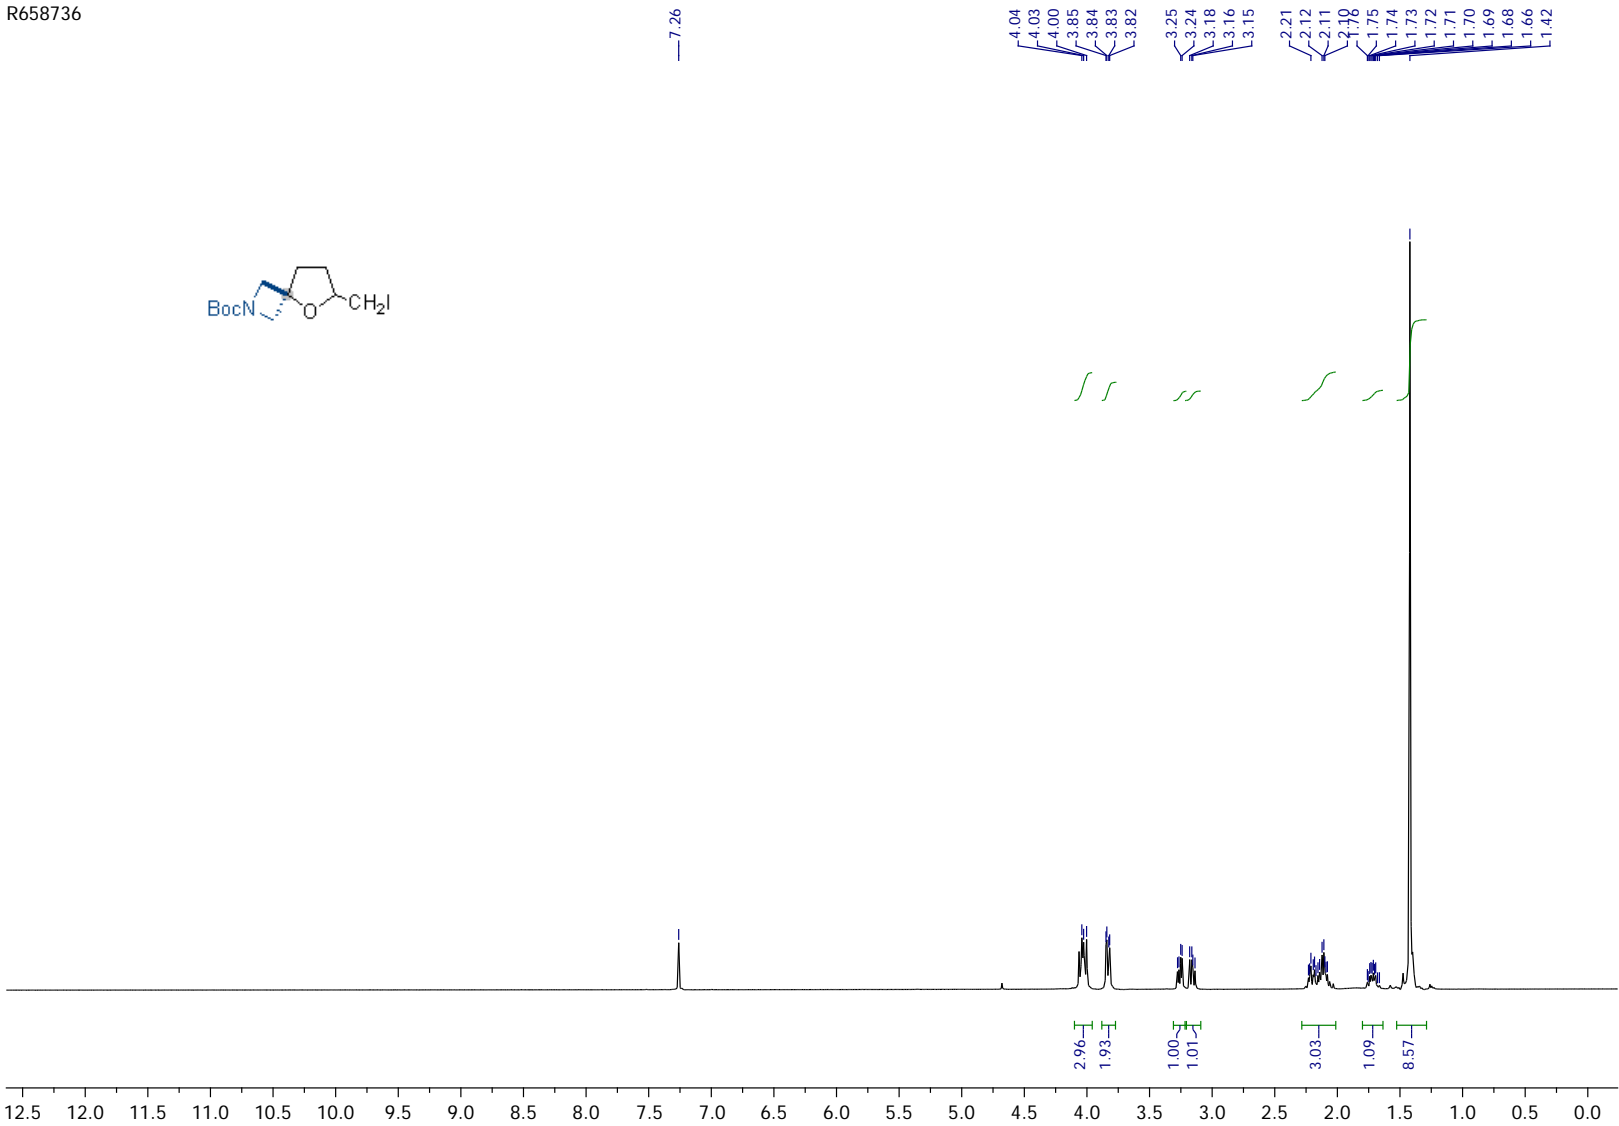

R658736\_C13

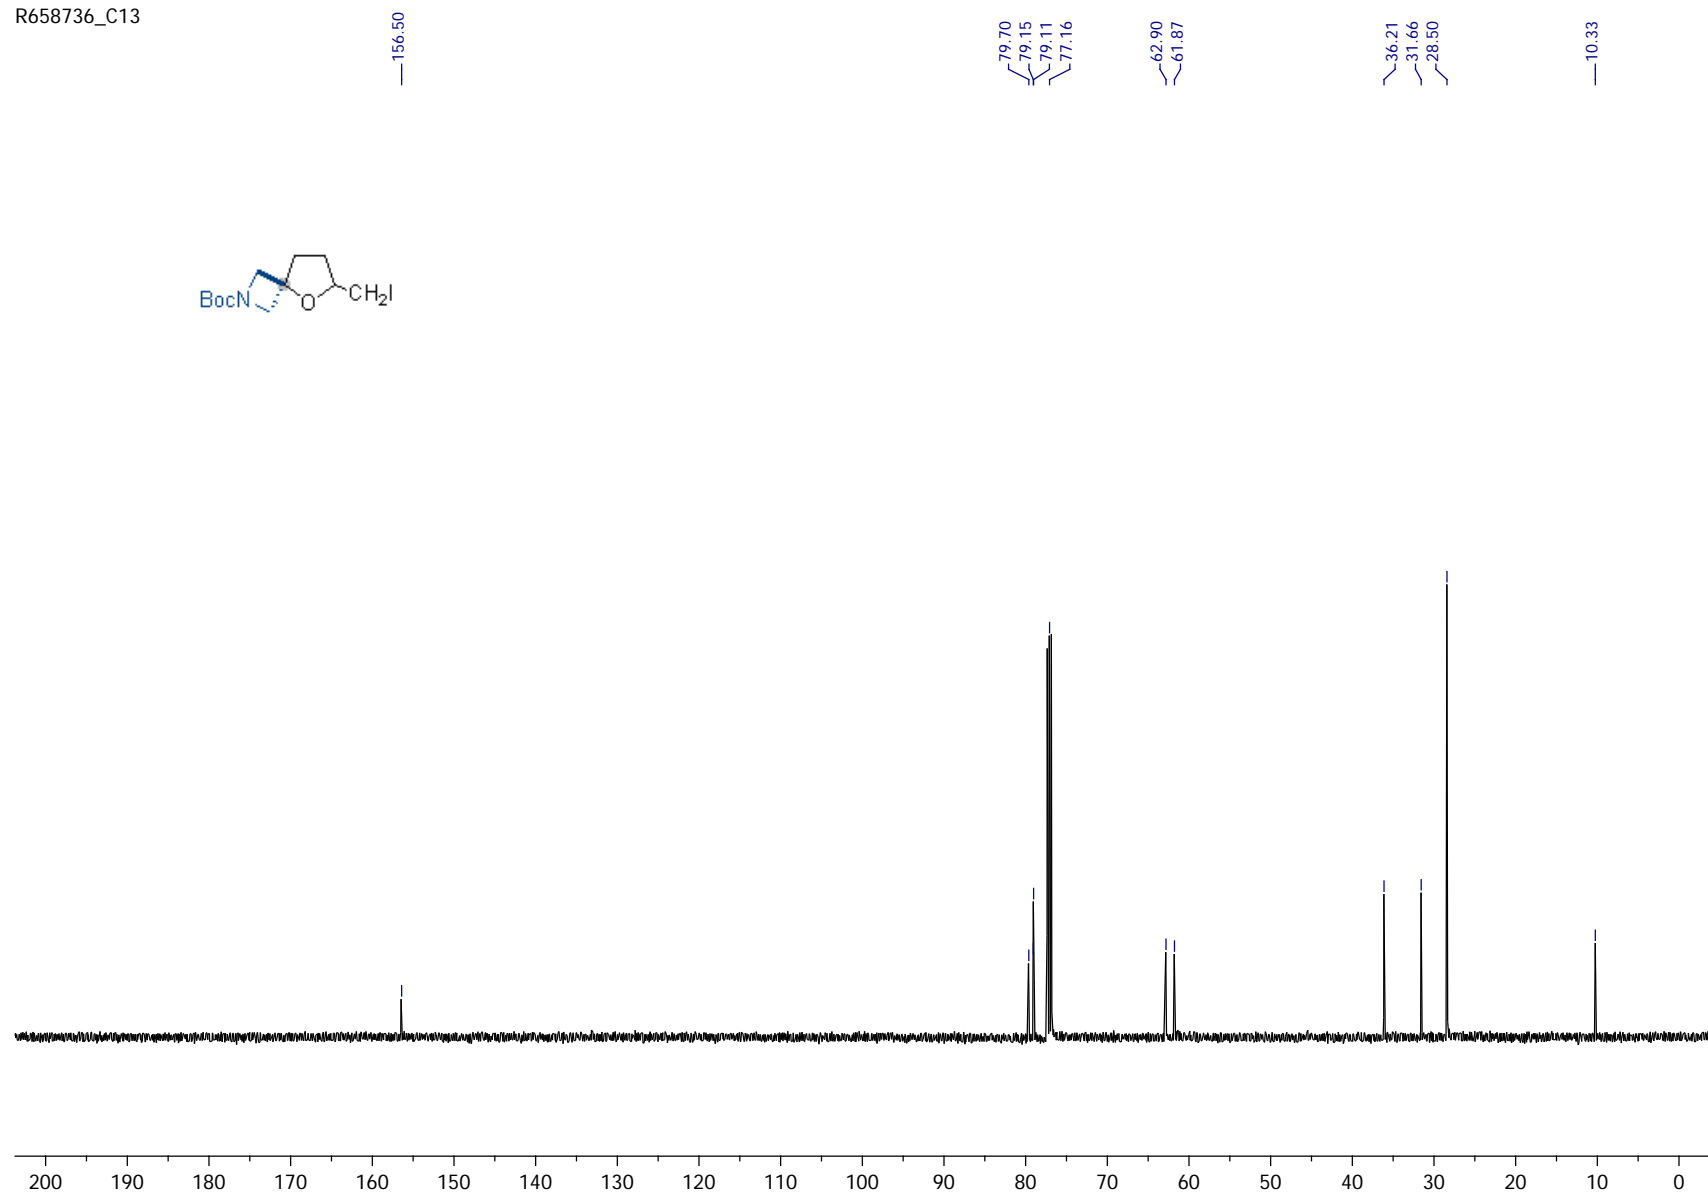

Compound 22a

R638782

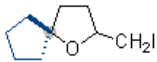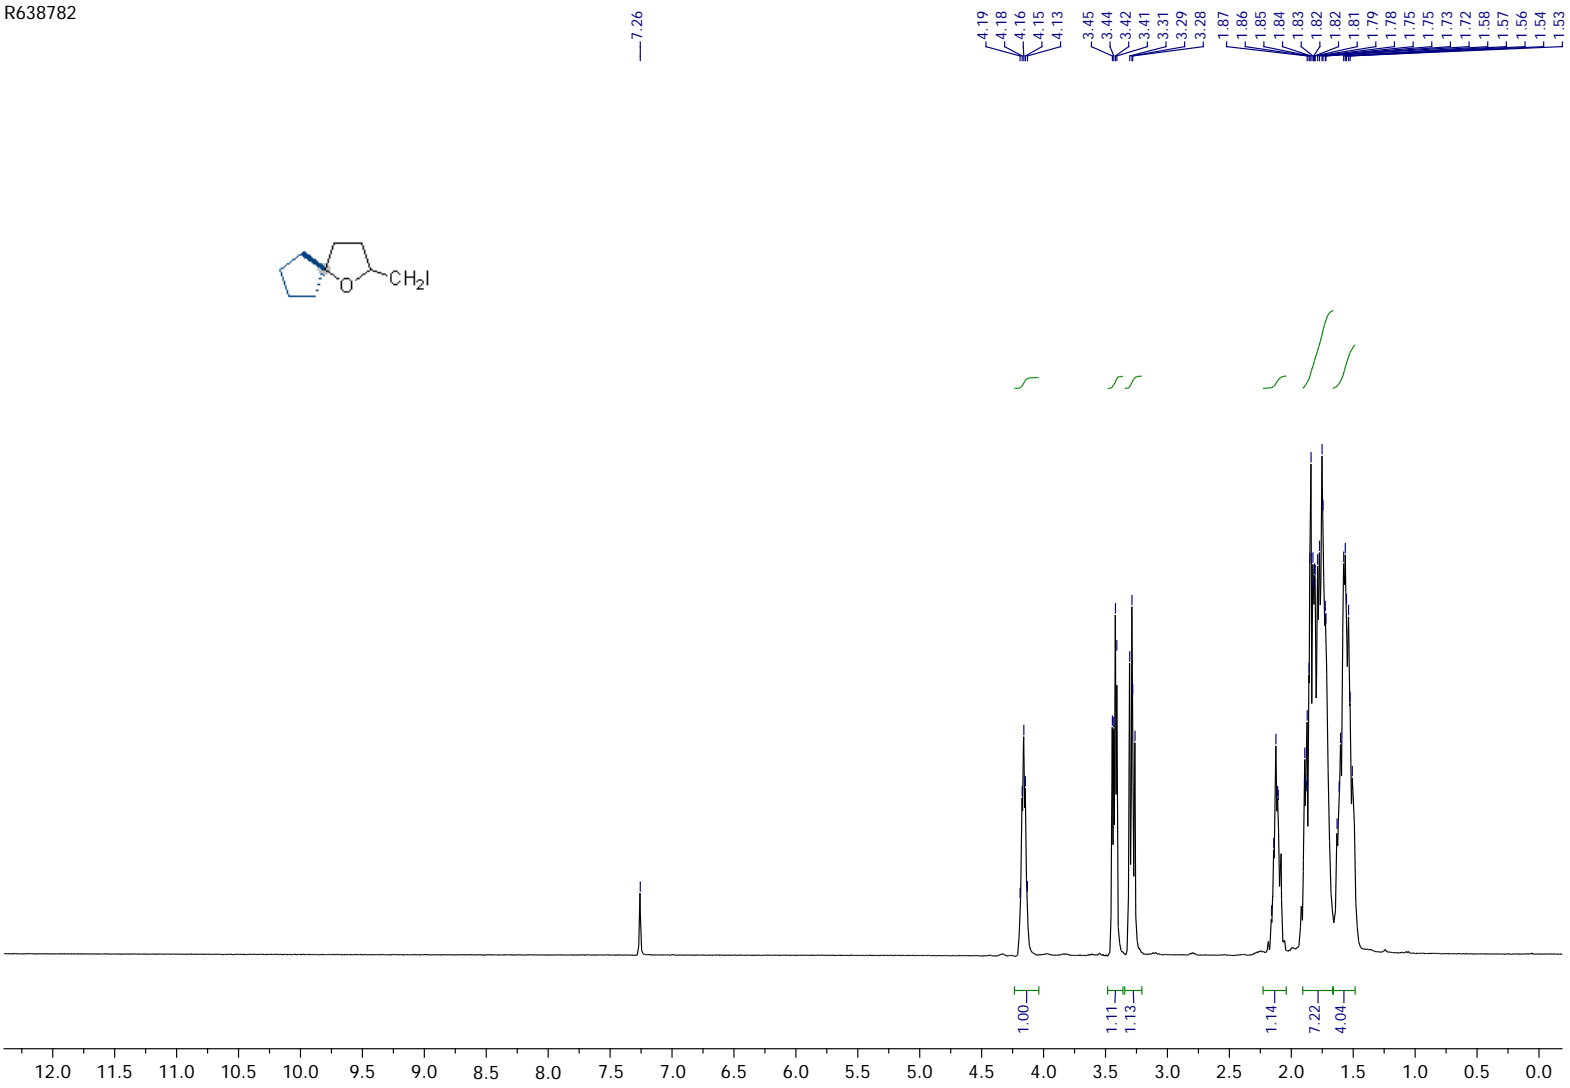

R638782\_13C

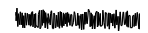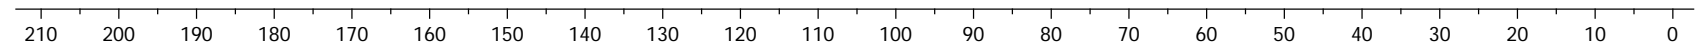

# Compound 23a

R1087139

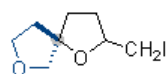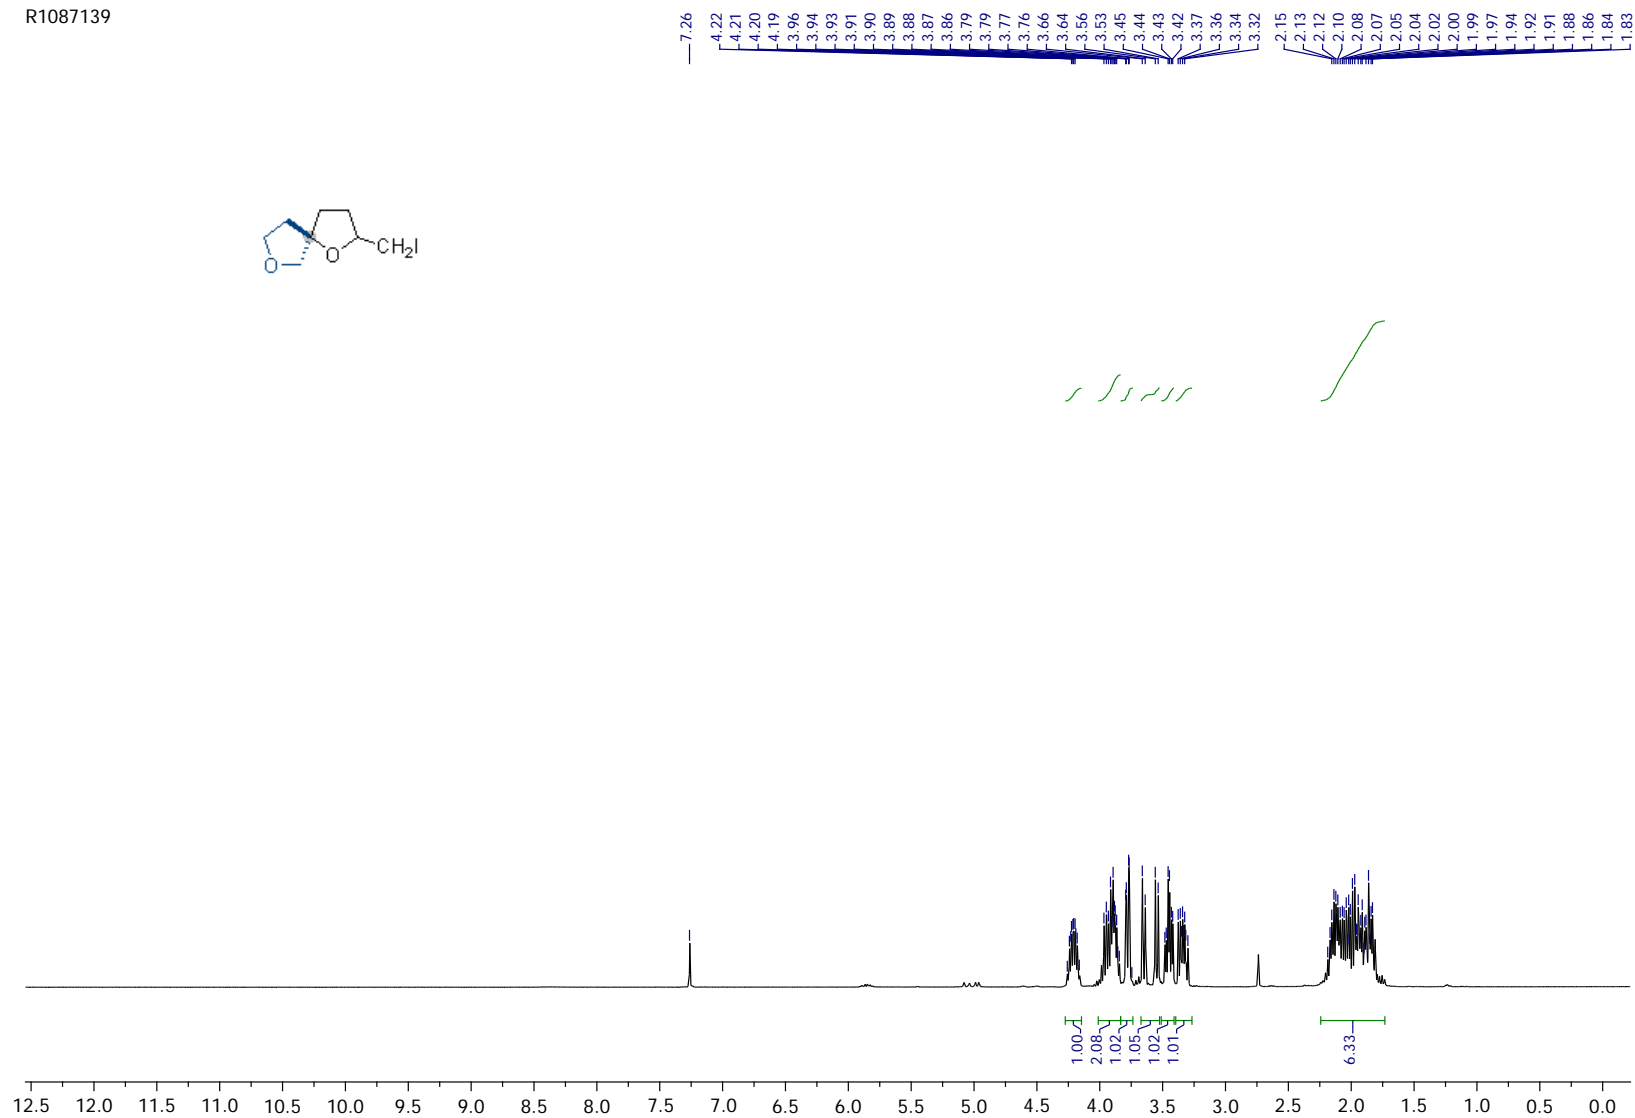

R1087139\_C13

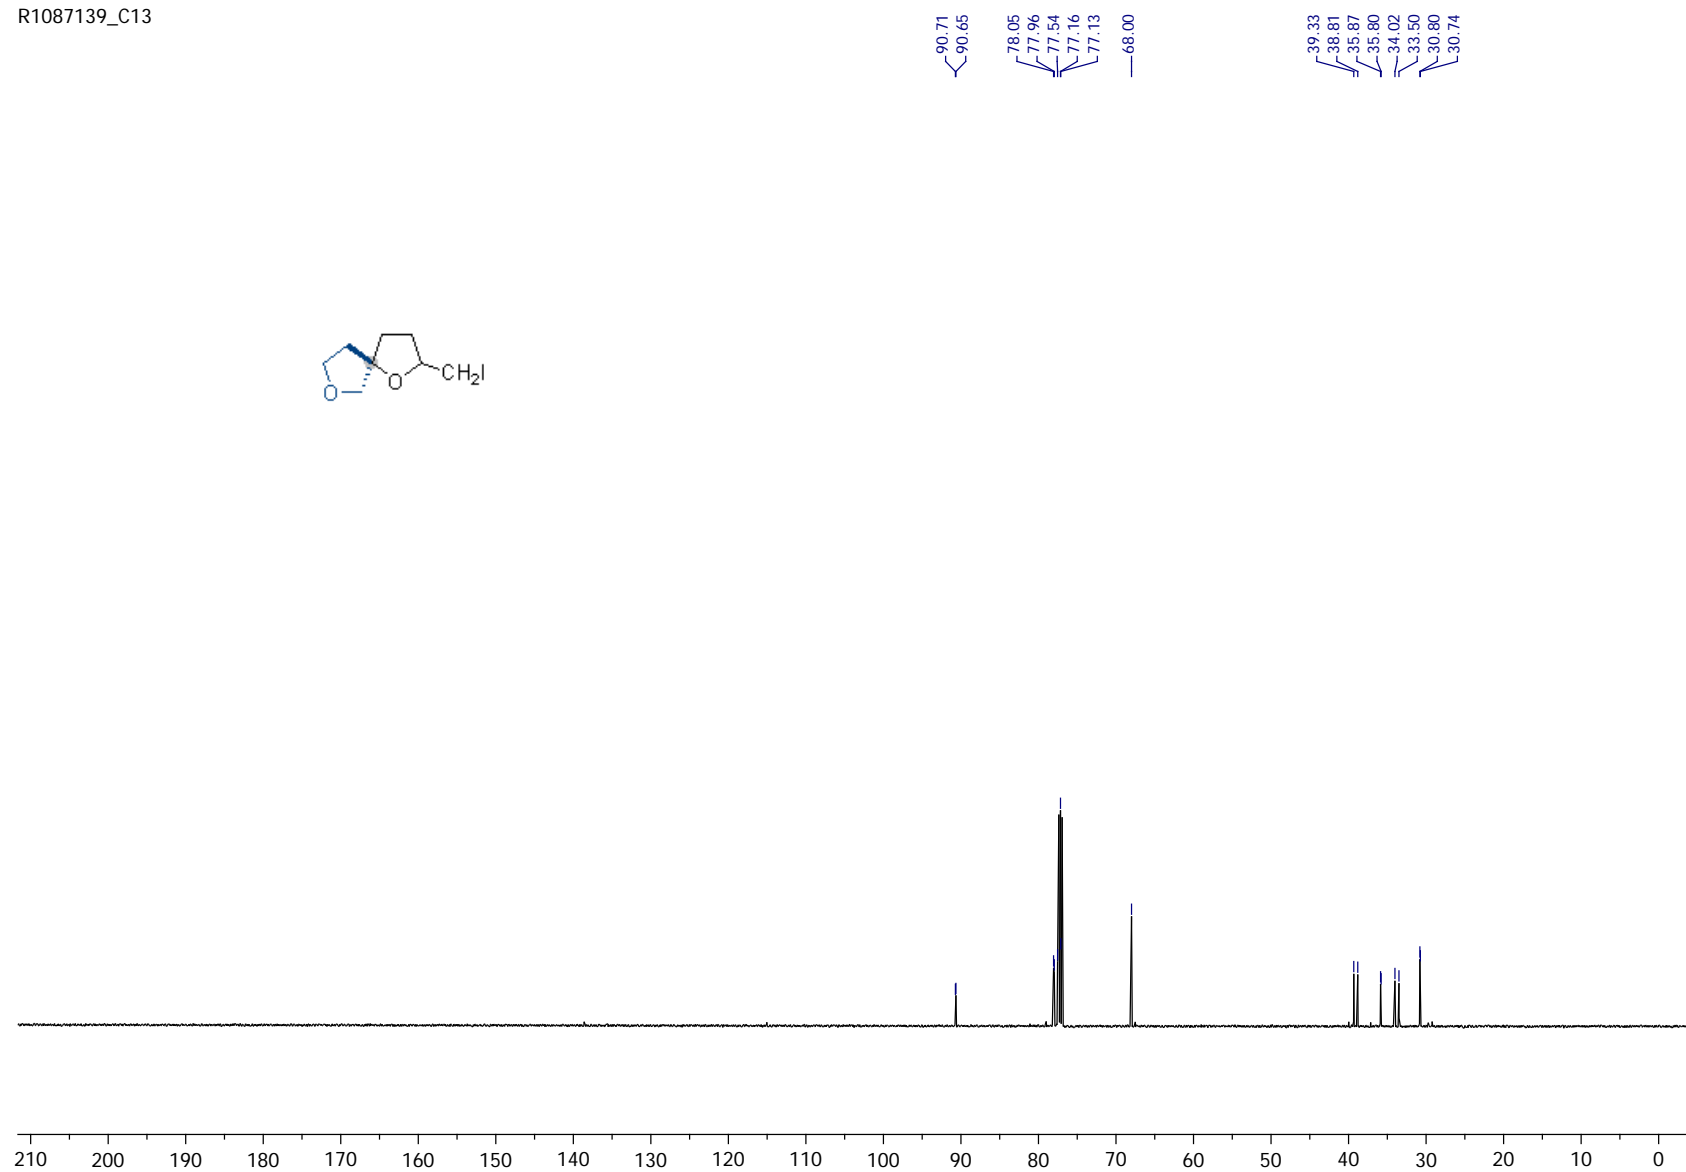

Compound 24a

R1248520

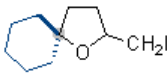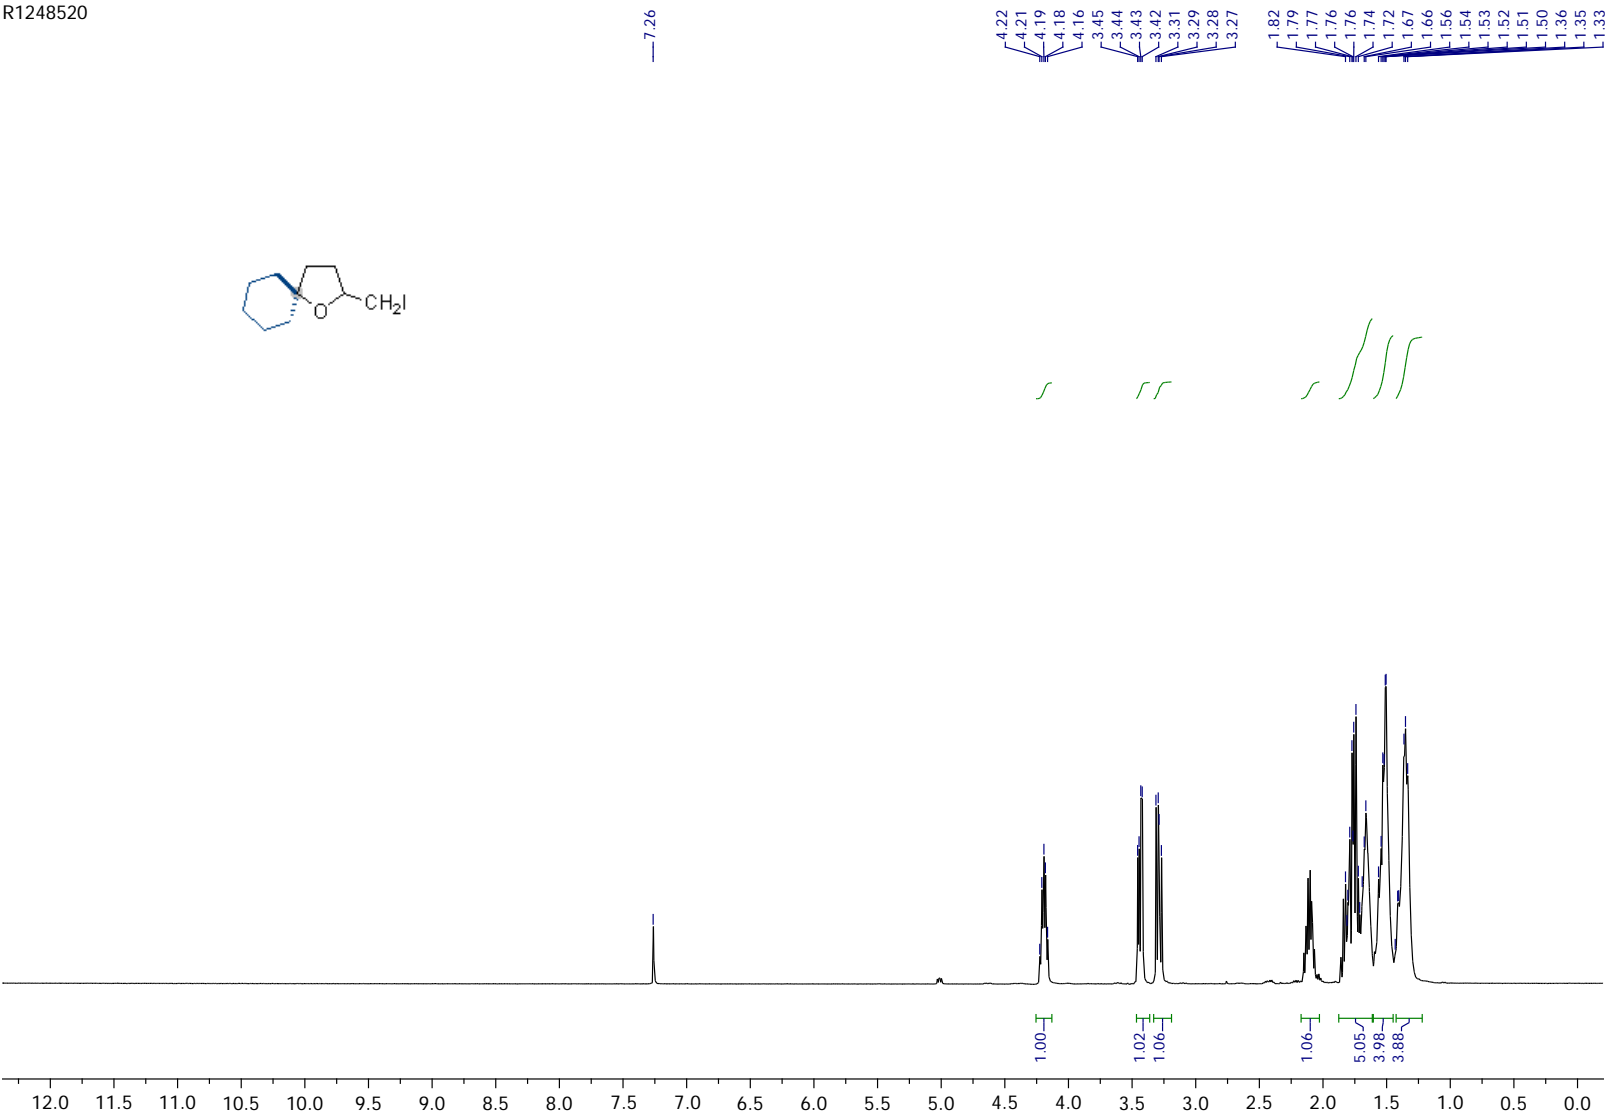



R1248520\_13C

|||||

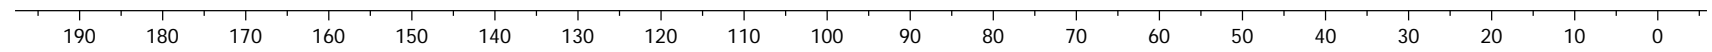

Compound 25a

R1691406

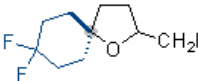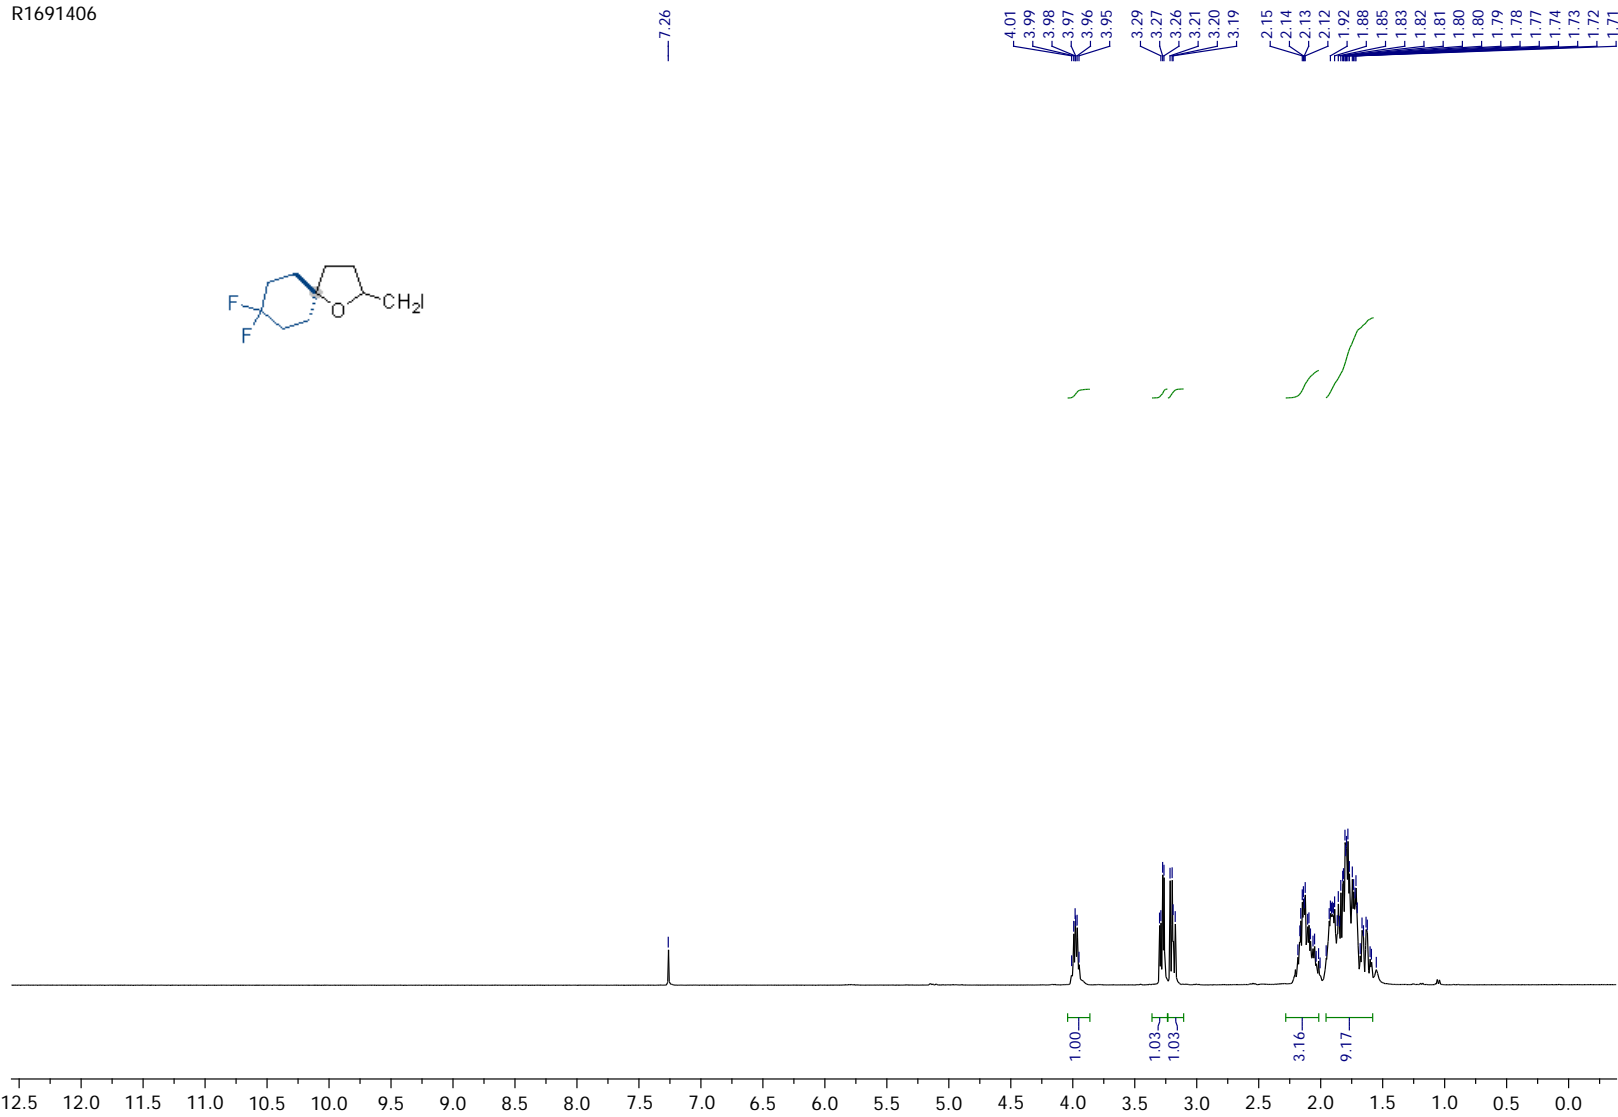



R1691406\_F19{H}

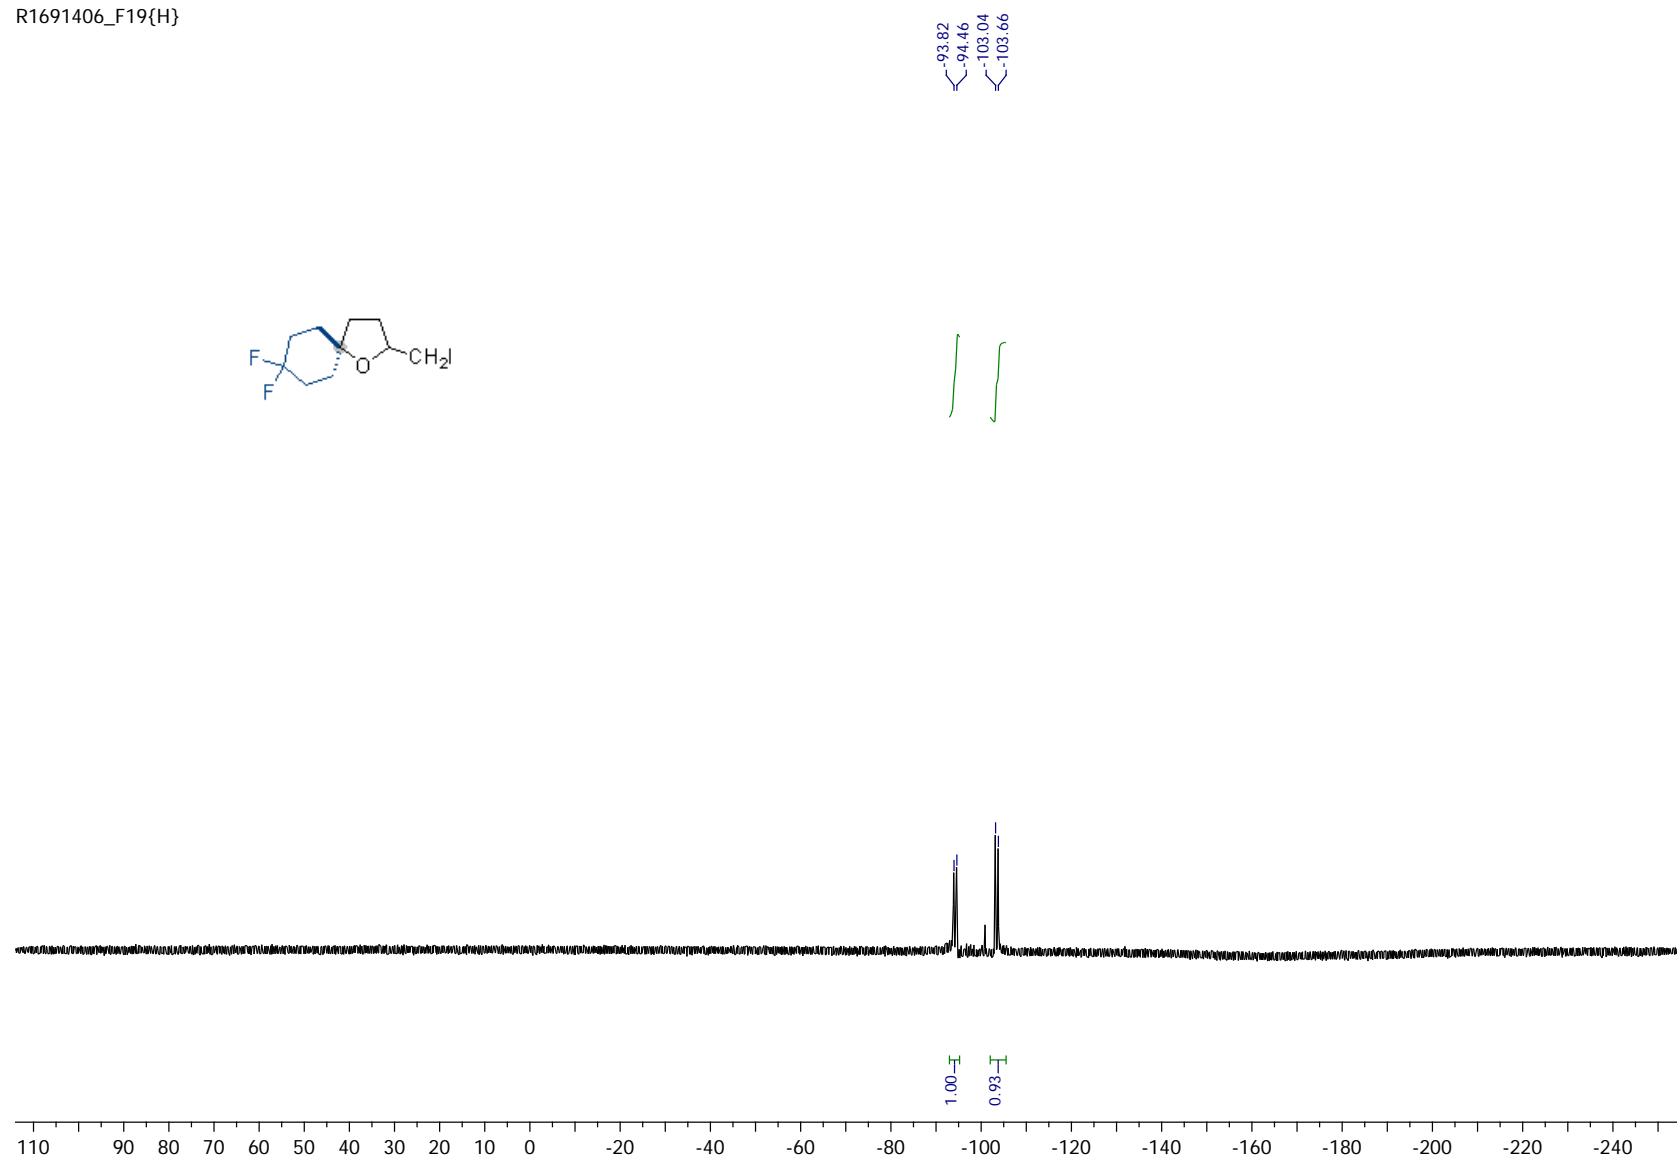

Compound 26a

R1690102

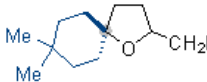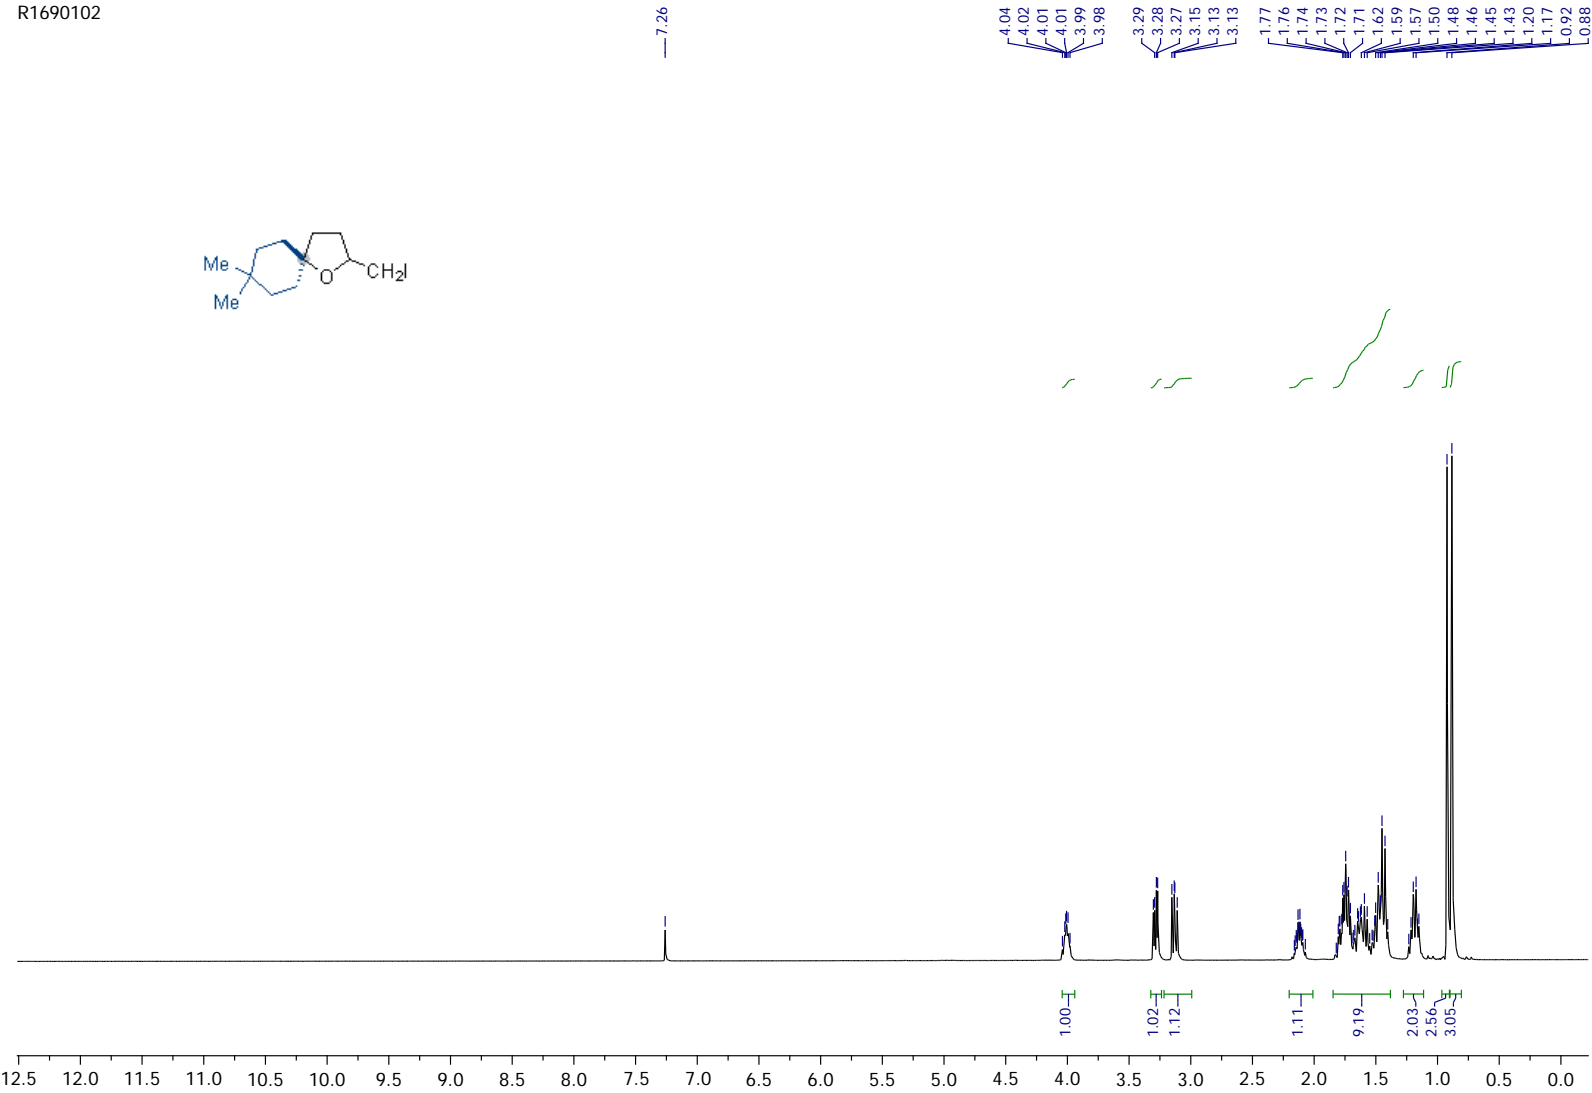

R1690102\_C13

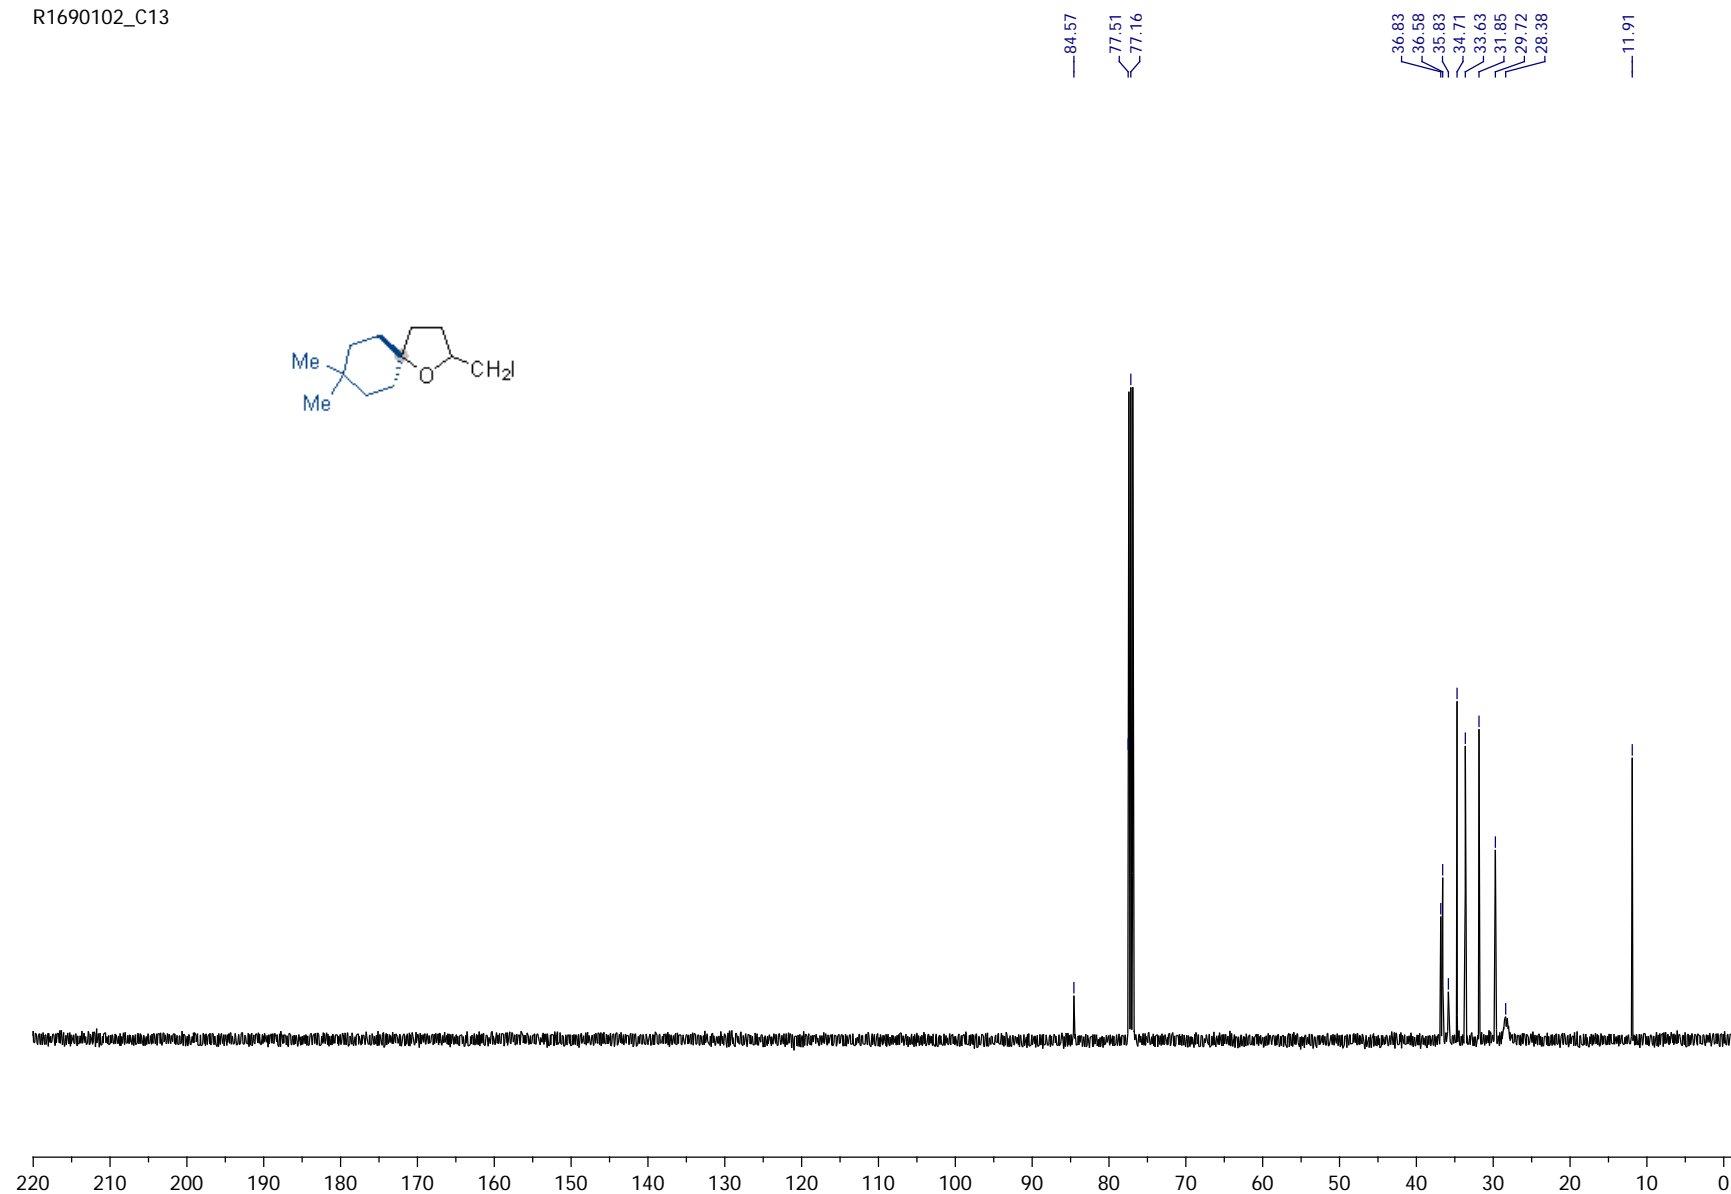

Compound 27a

R829119

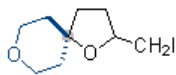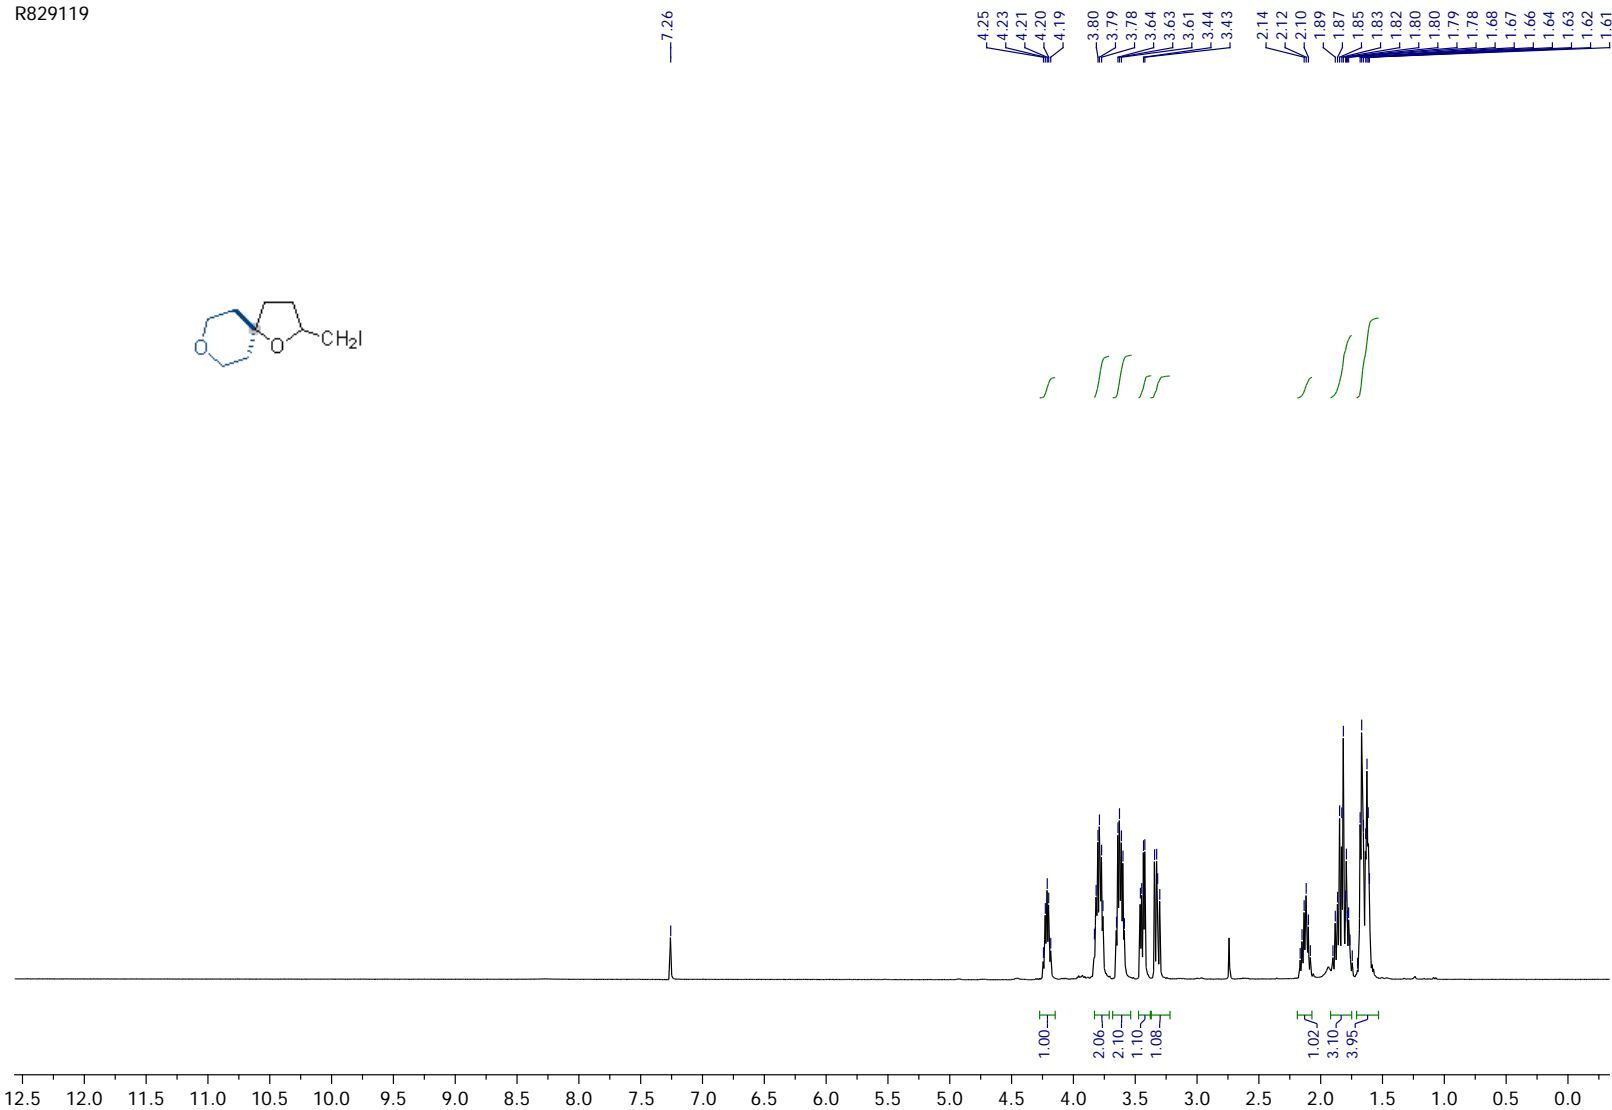

R829119\_C13

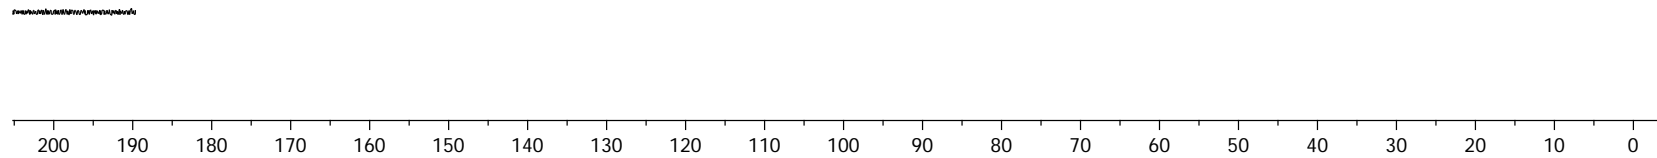



Compound 28a

R1712251

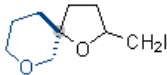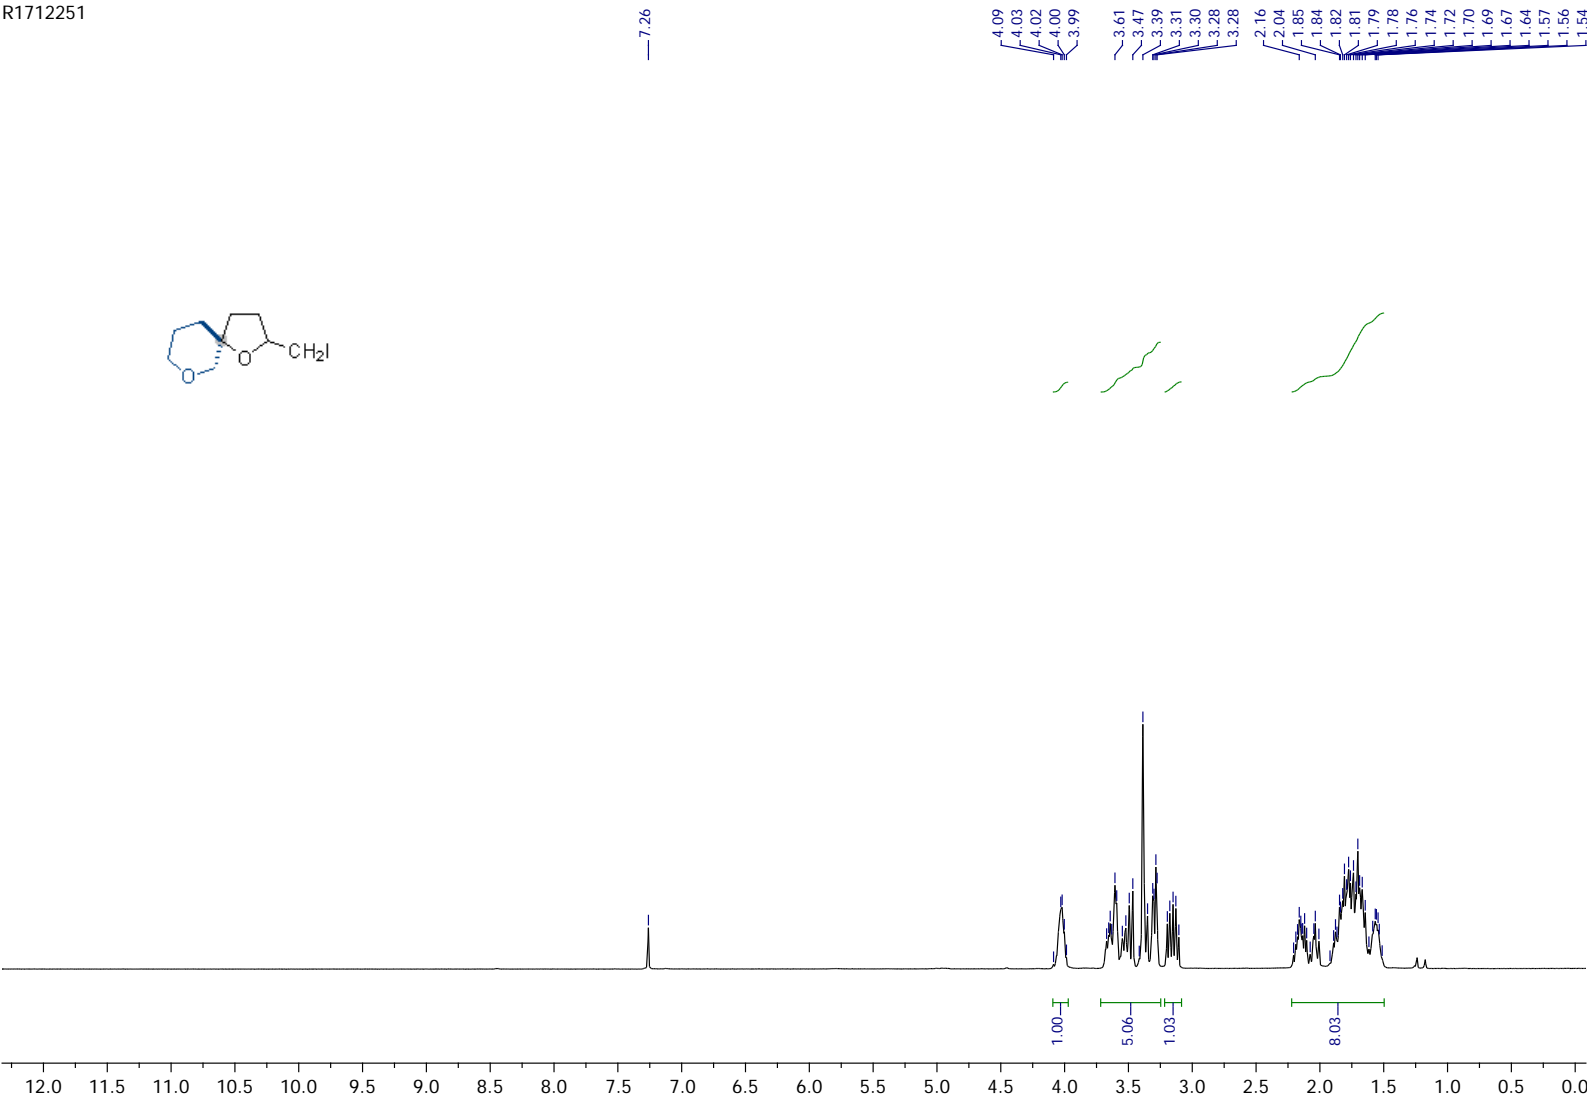

R1712251\_C13

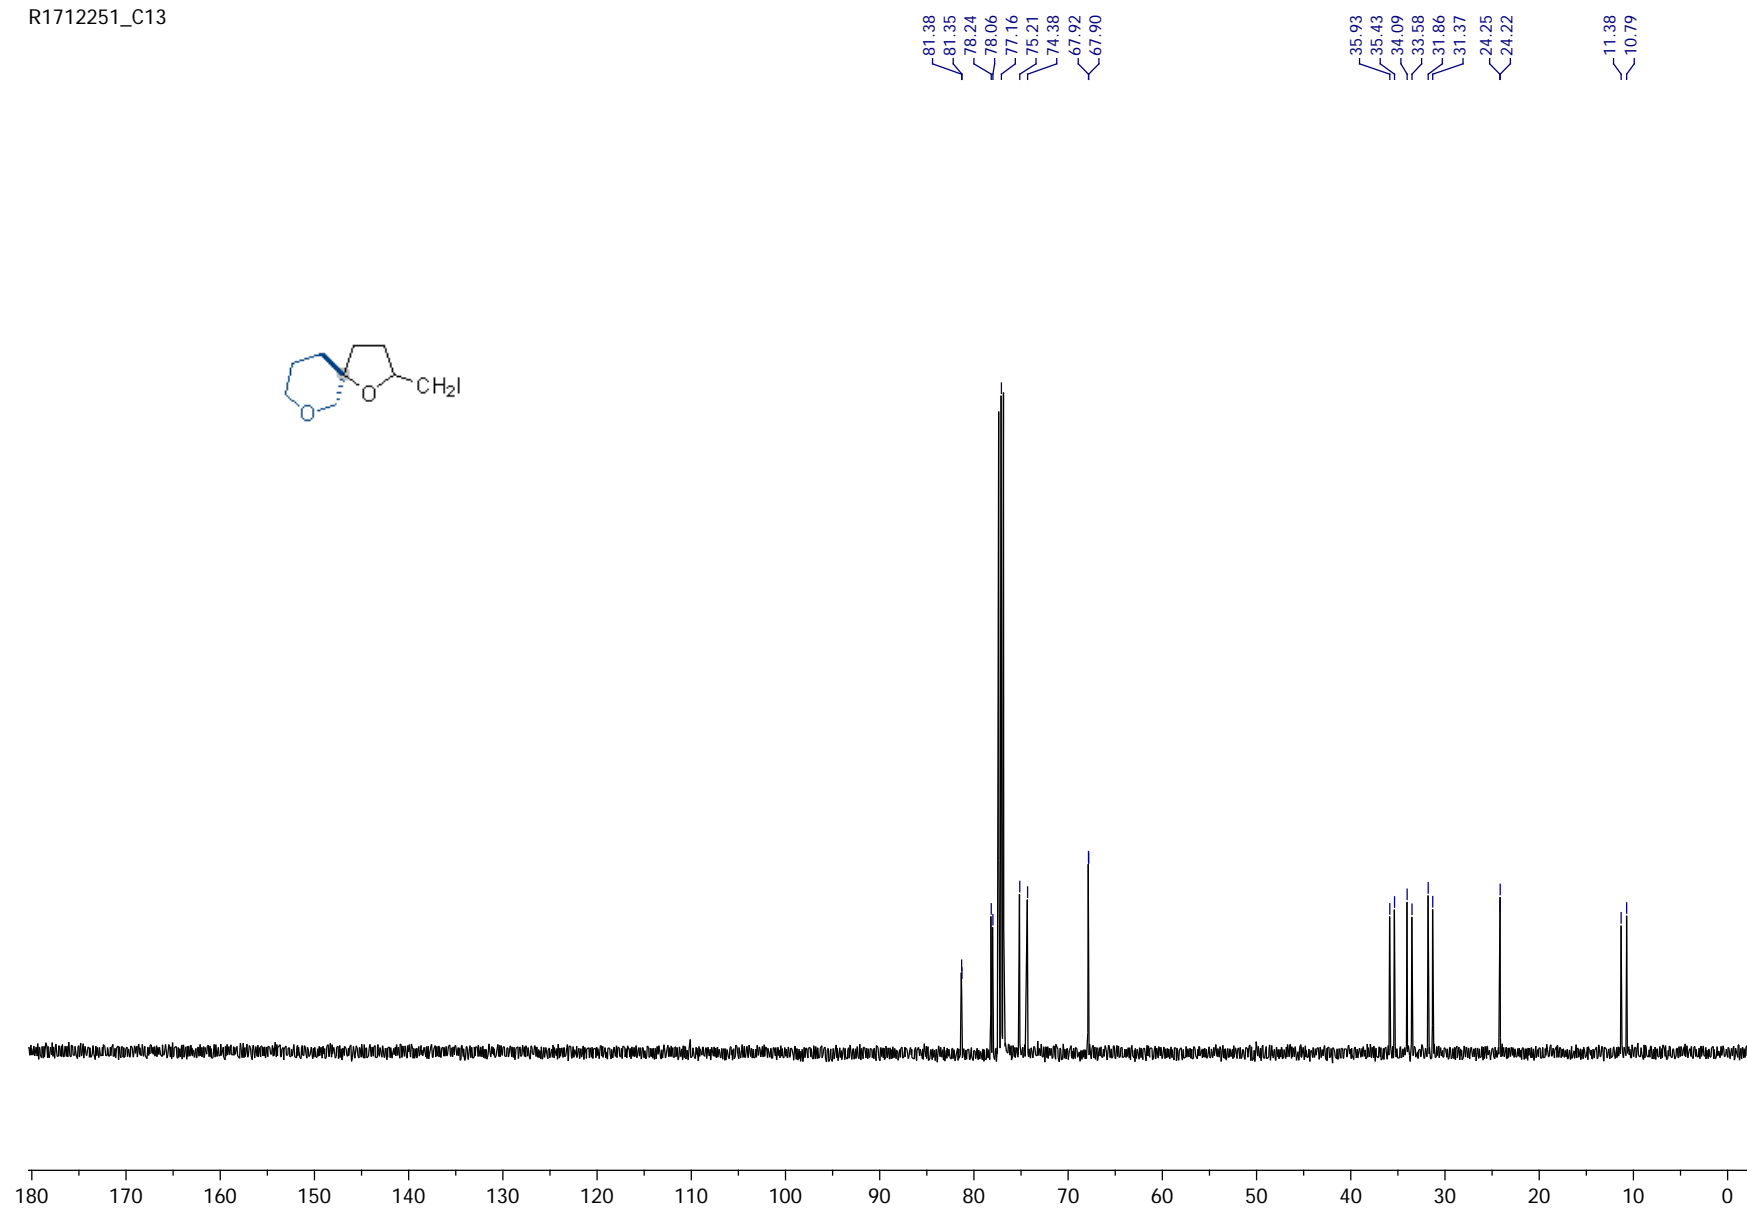

Compound 29a

R1615653

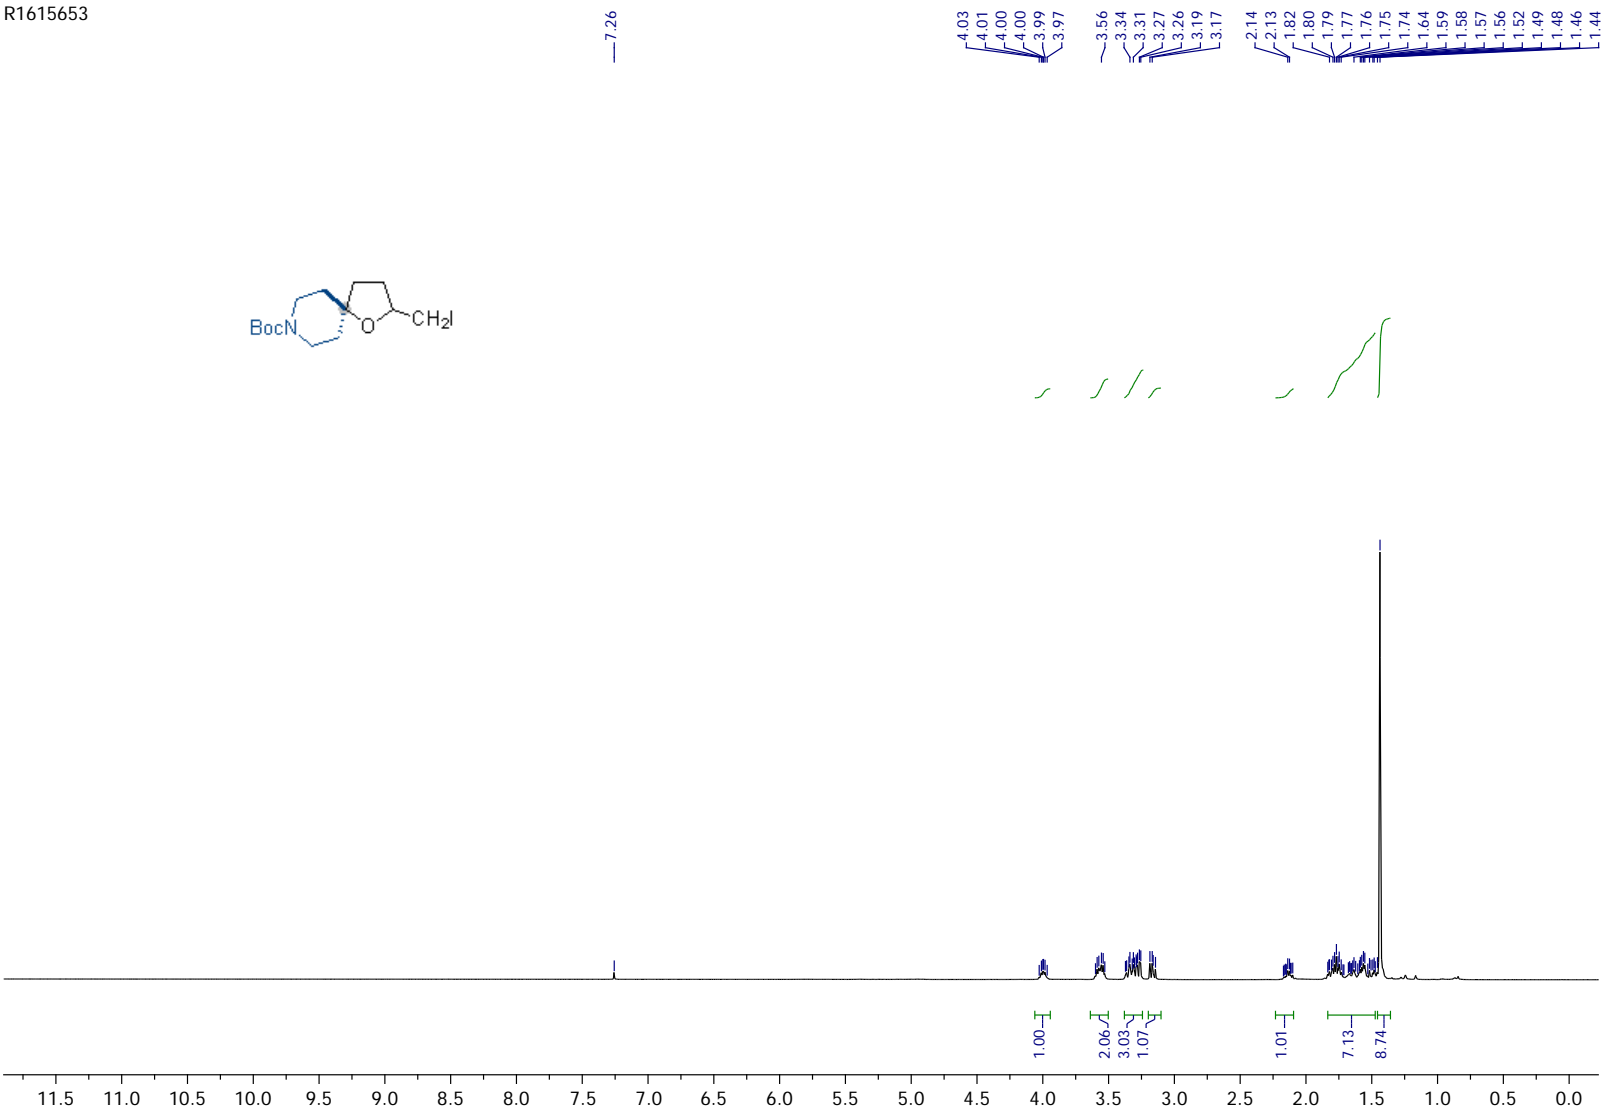

R1615653\_C13

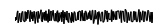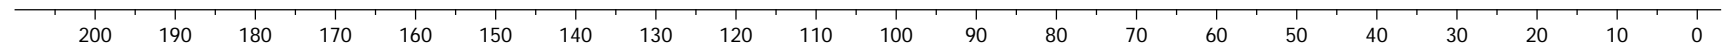

Compound 30a

R929375

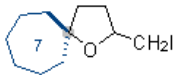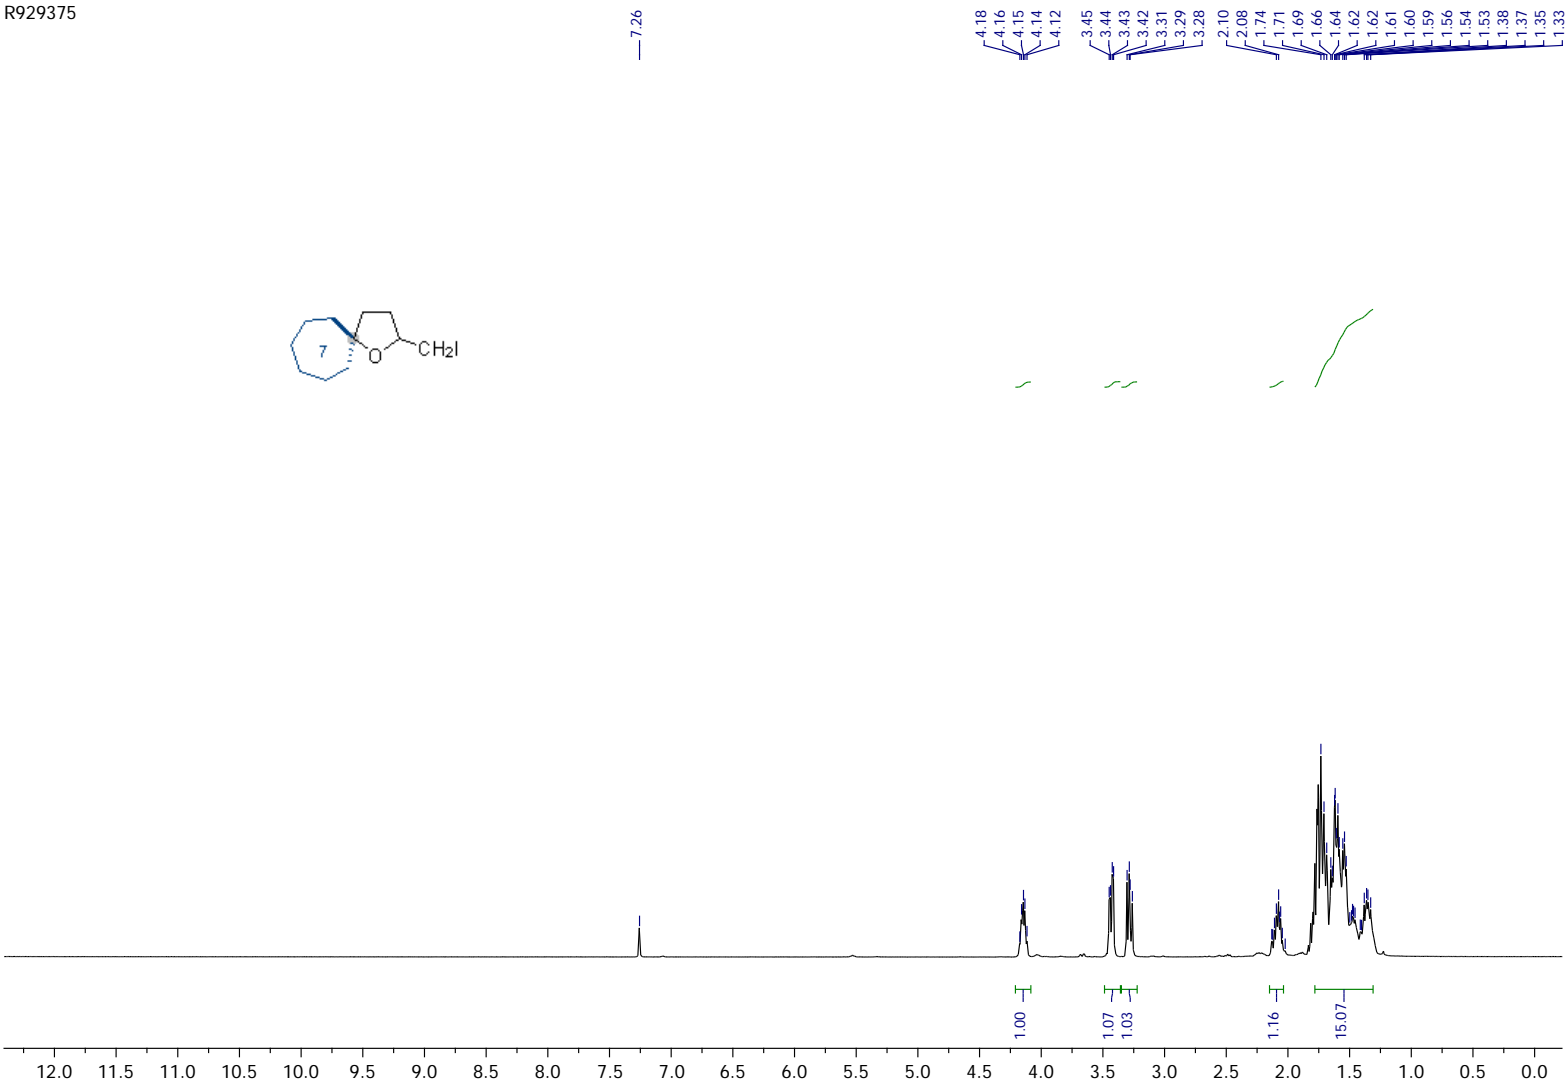

R929375\_C13

|||||

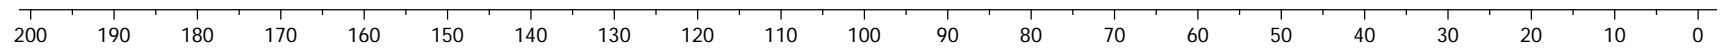

Compound 31a

R1322045

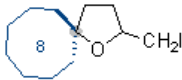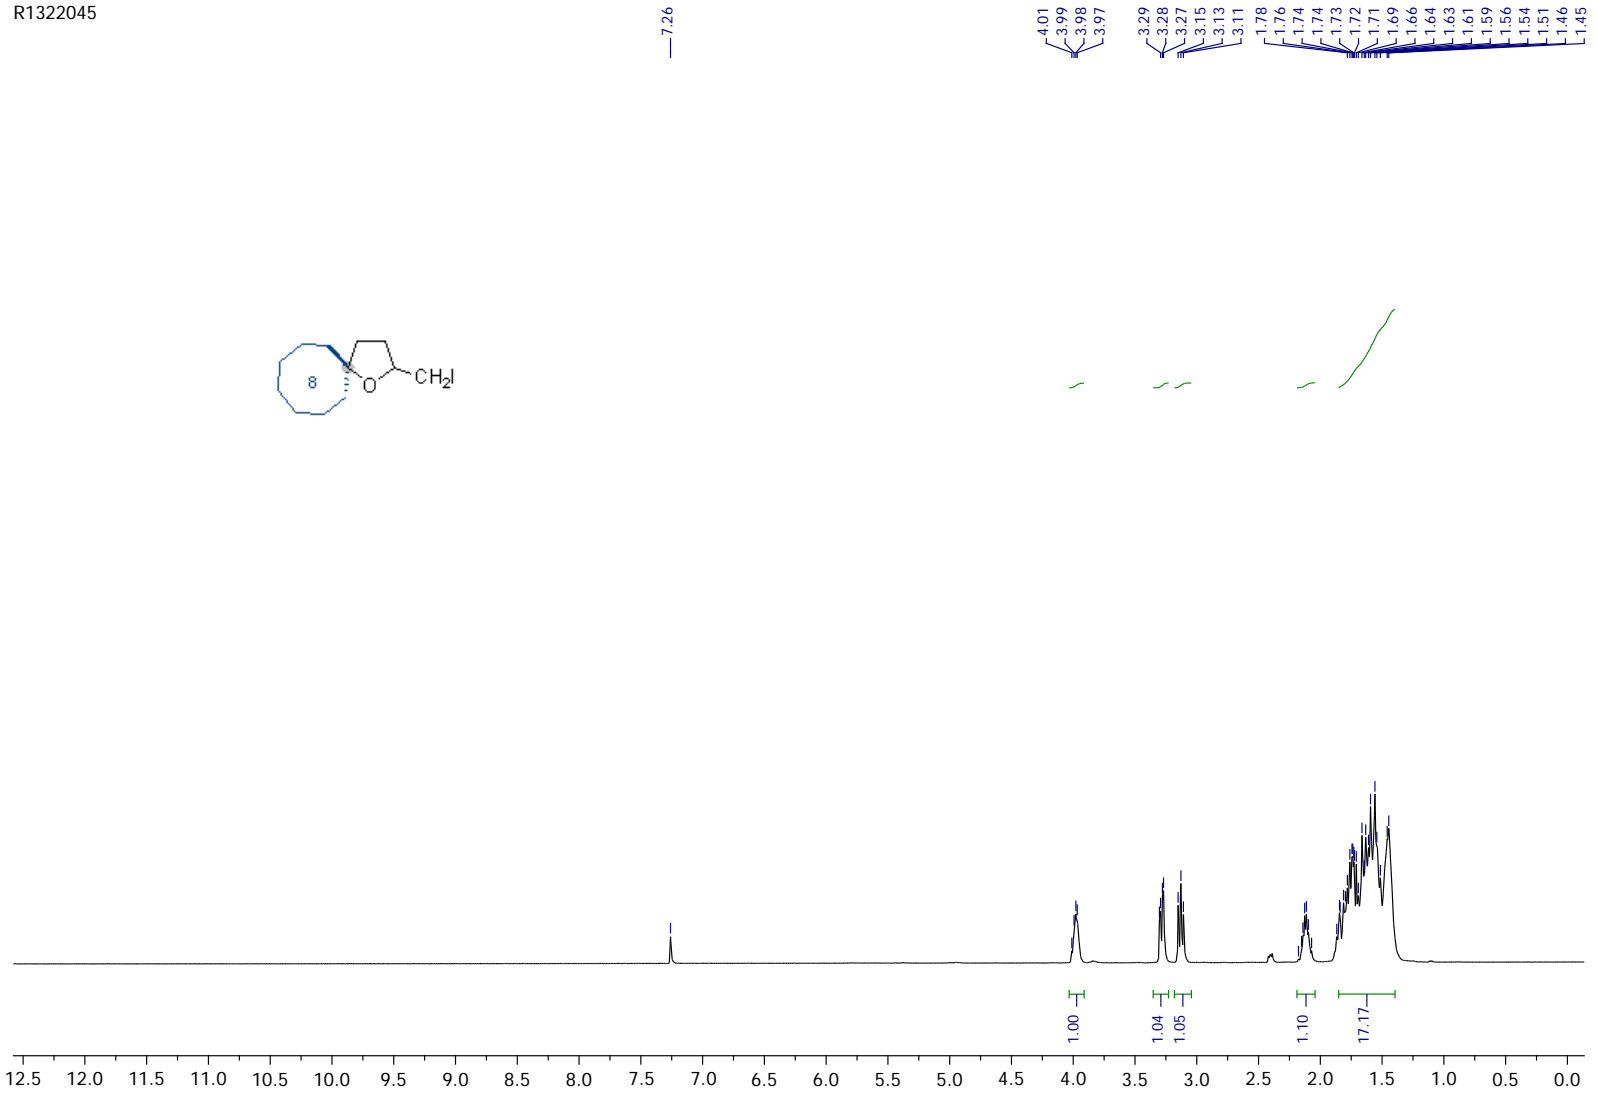

R1322045\_C13

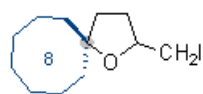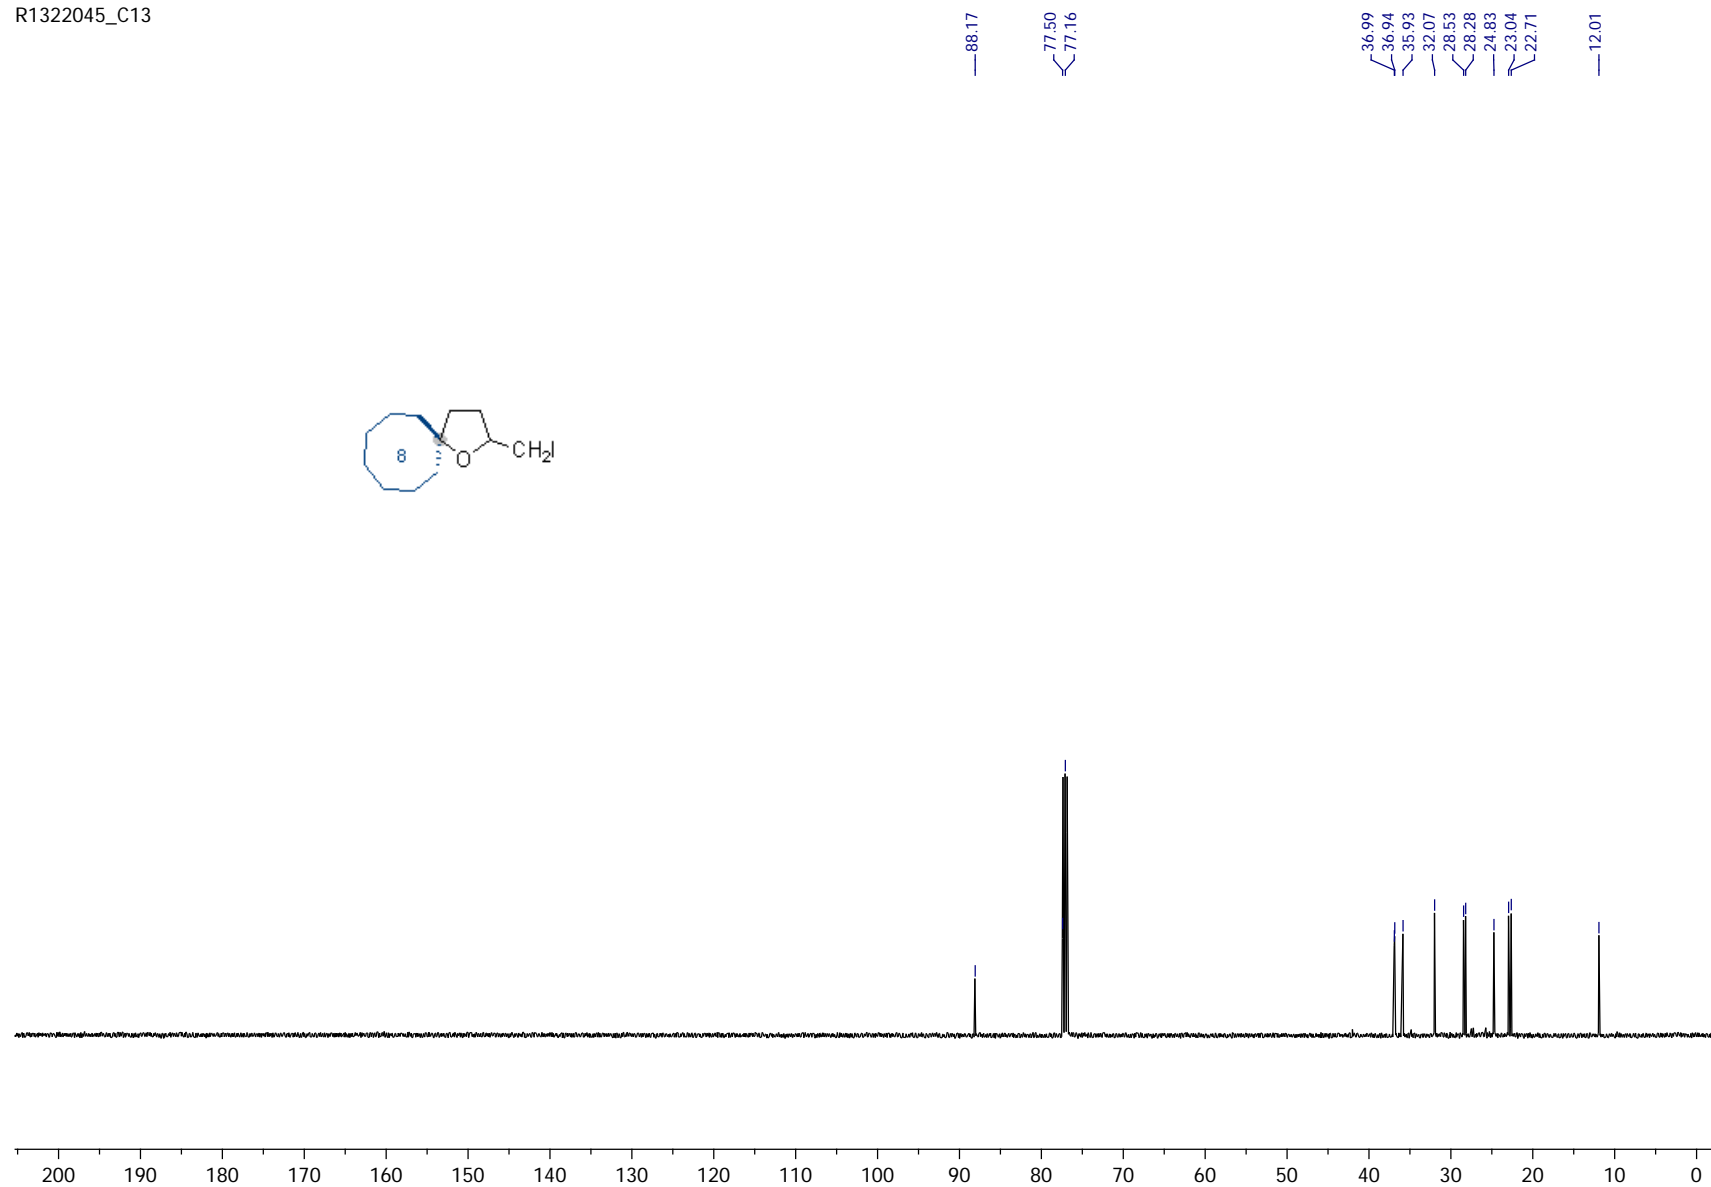



Compound 32a

R1604432

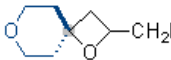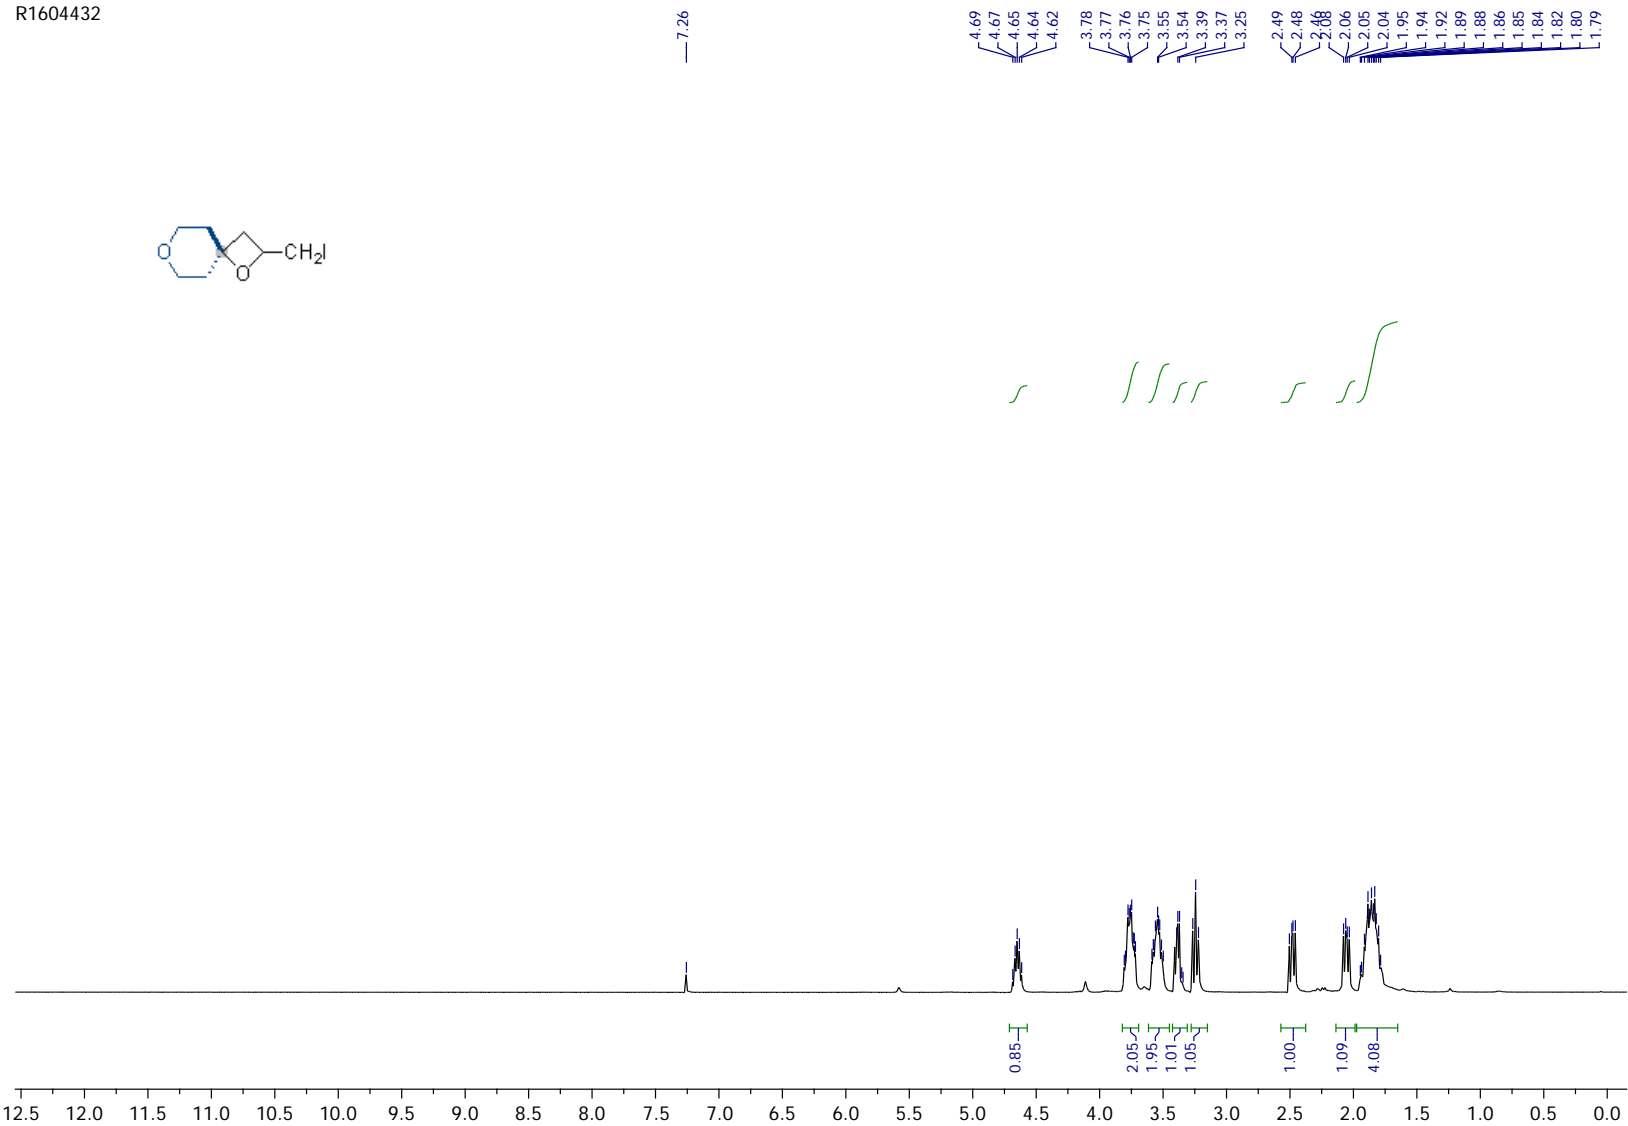



### Compound 33a

R1235197

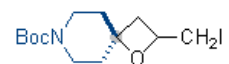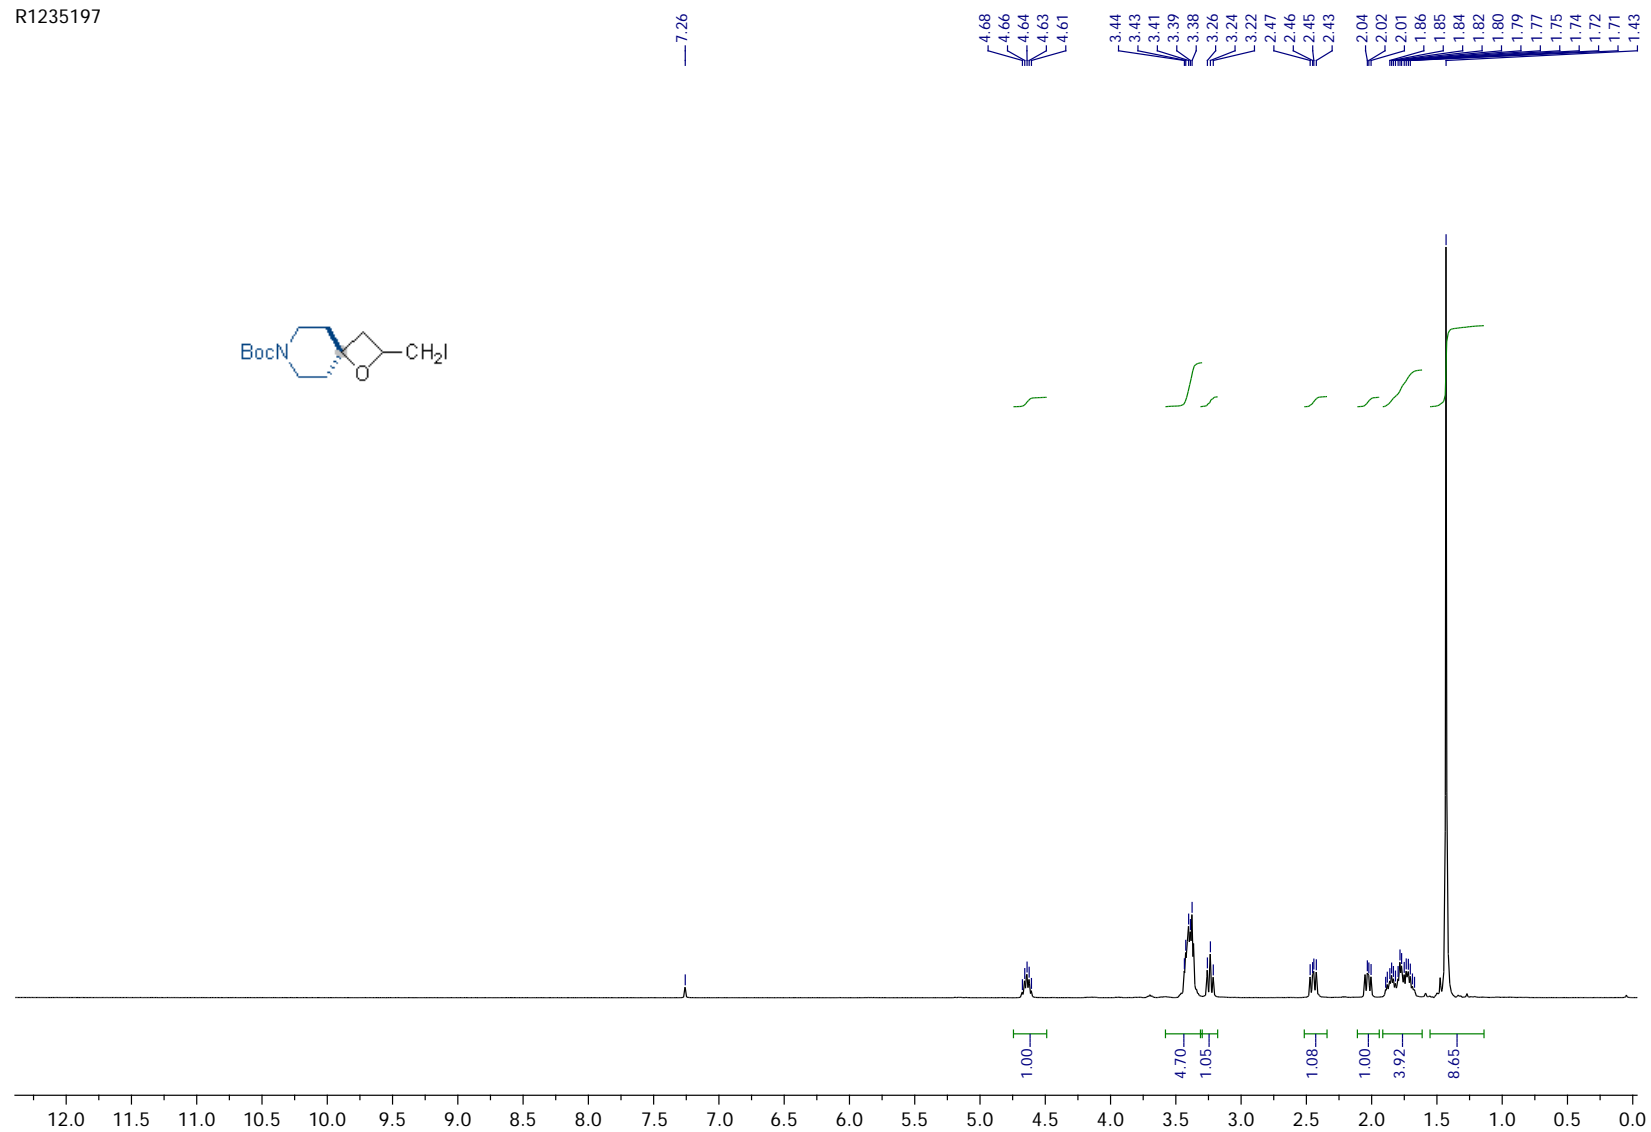

R1235197\_13C

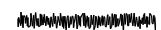

210 200 190 180 170 160 150 140 130 120 110 100 90 80 70 60 50 40 30 20 10 0

Compound 34a

R835643

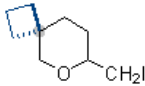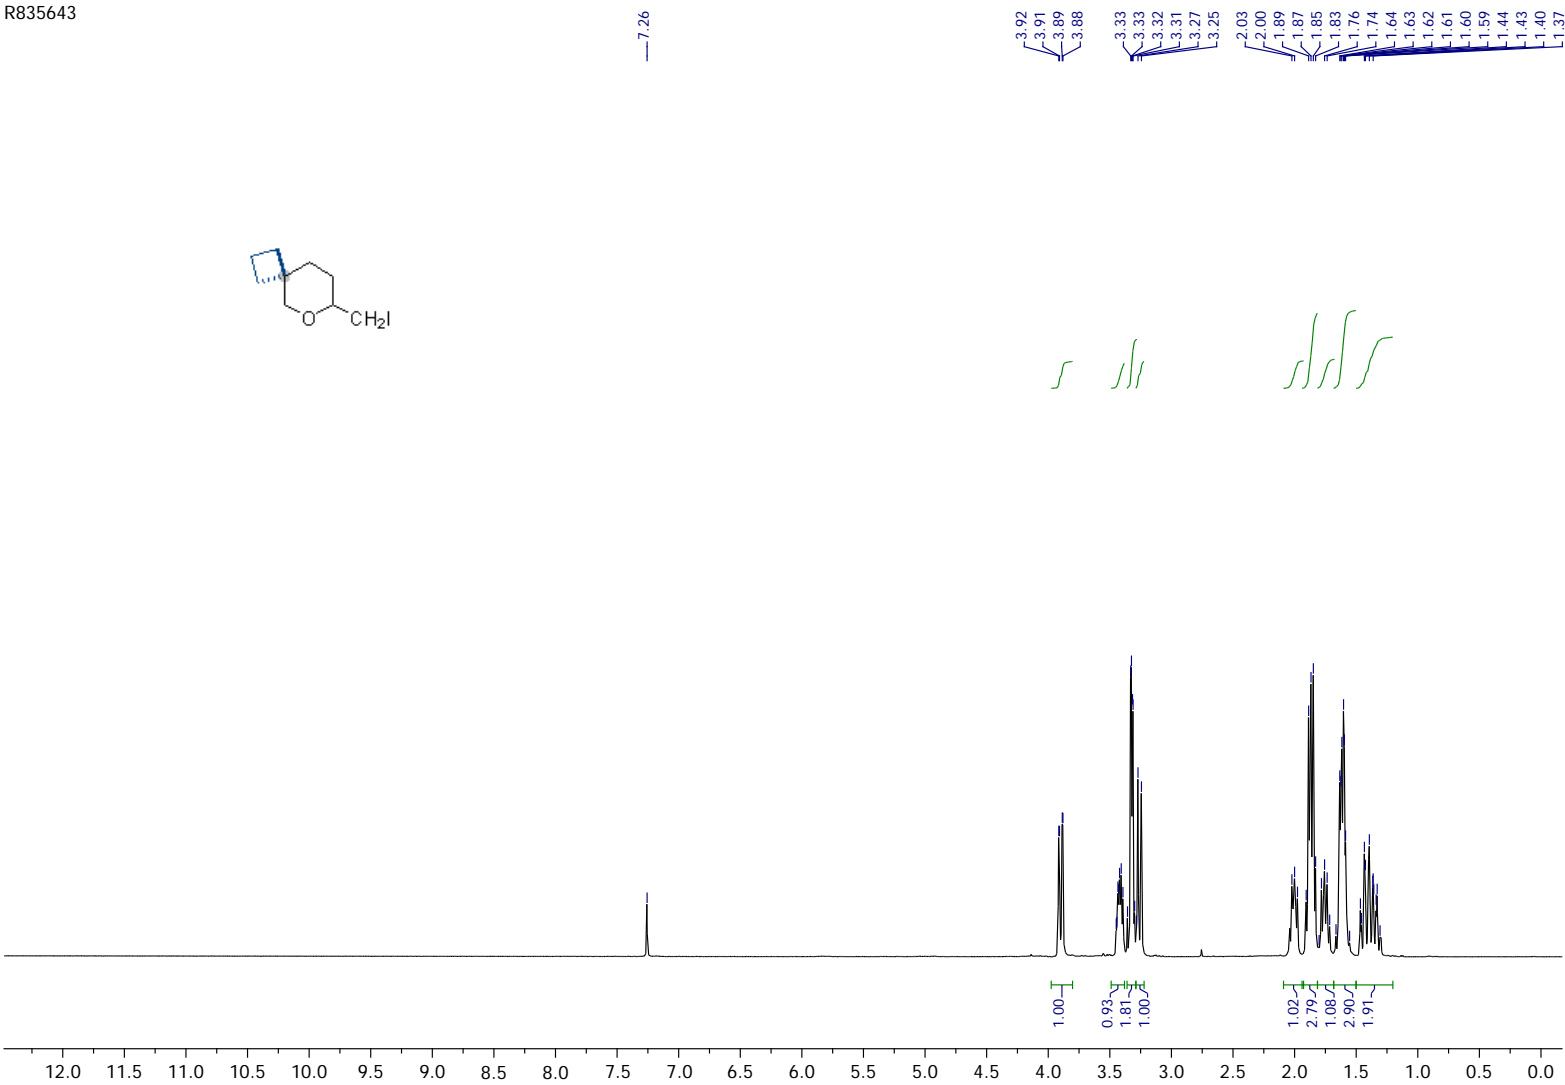

R835643\_C13

Wavelength (nm)

180 170 160 150 140 130 120 110 100 90 80 70 60 50 40 30 20 10 0

Compound 35a

R1703125

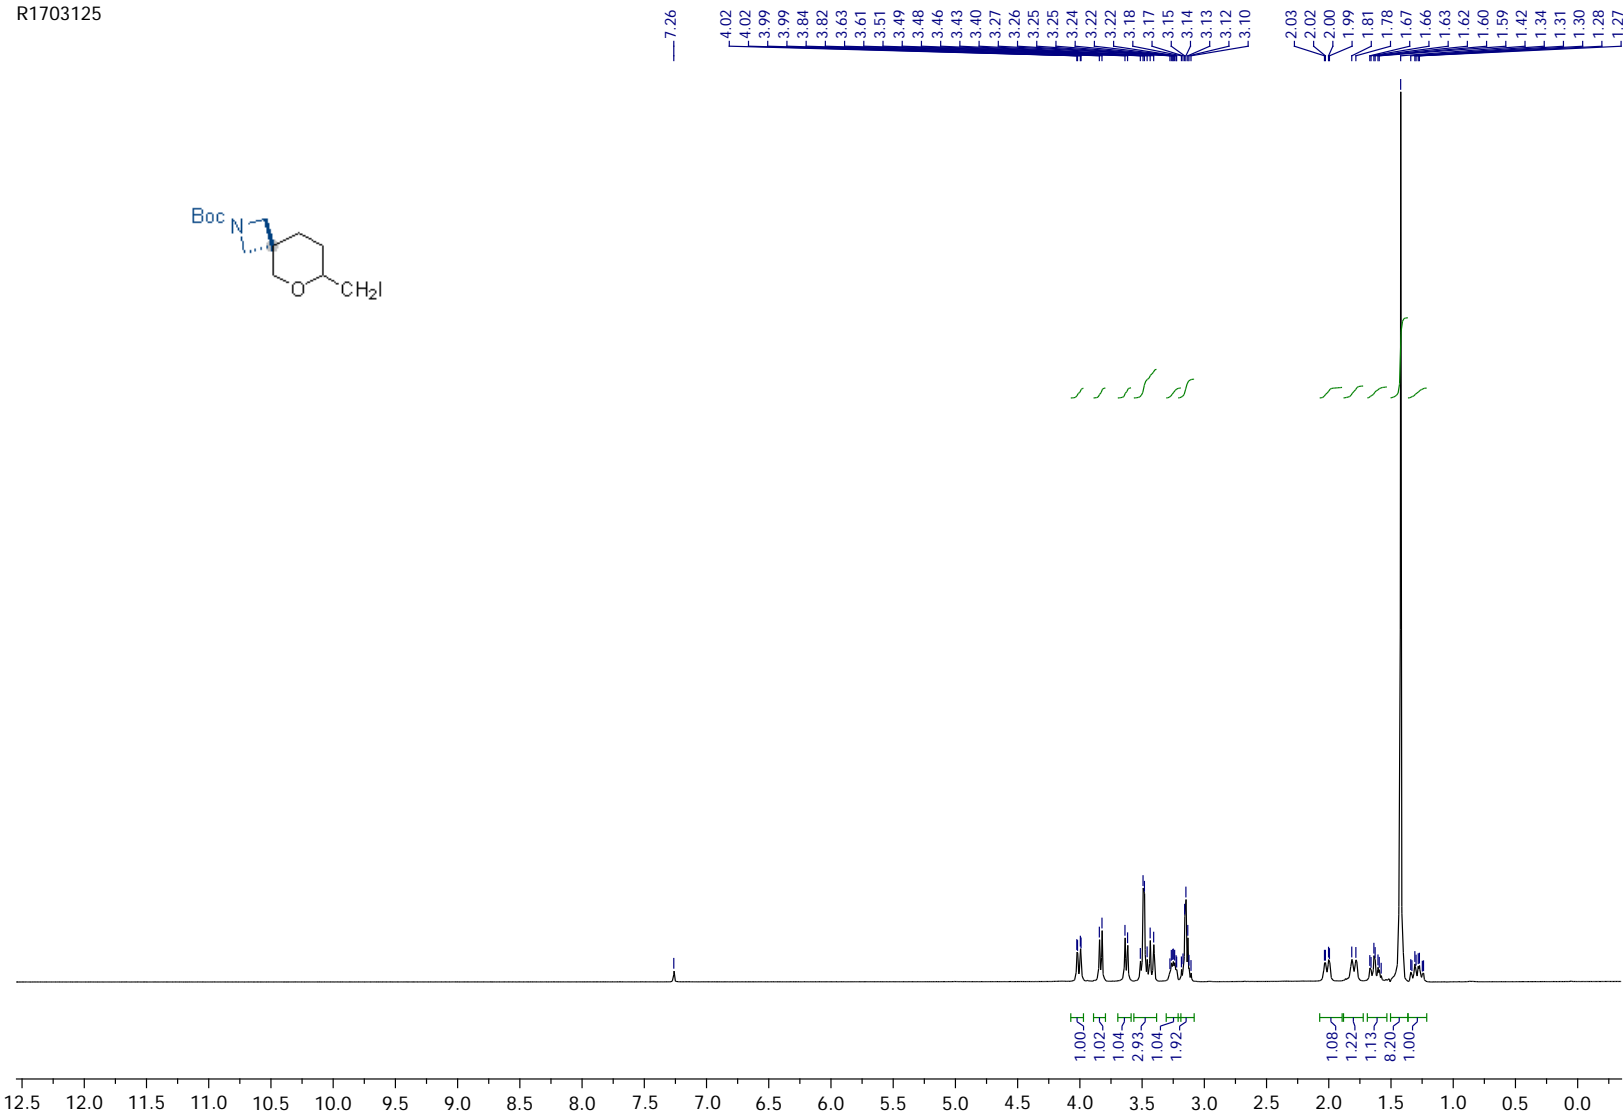

R1703125\_13C

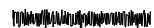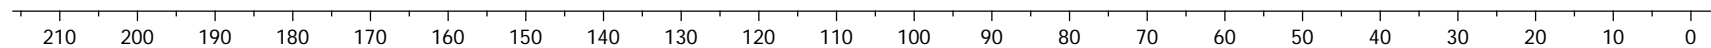



Compound 36a

R825769

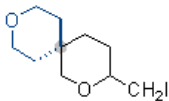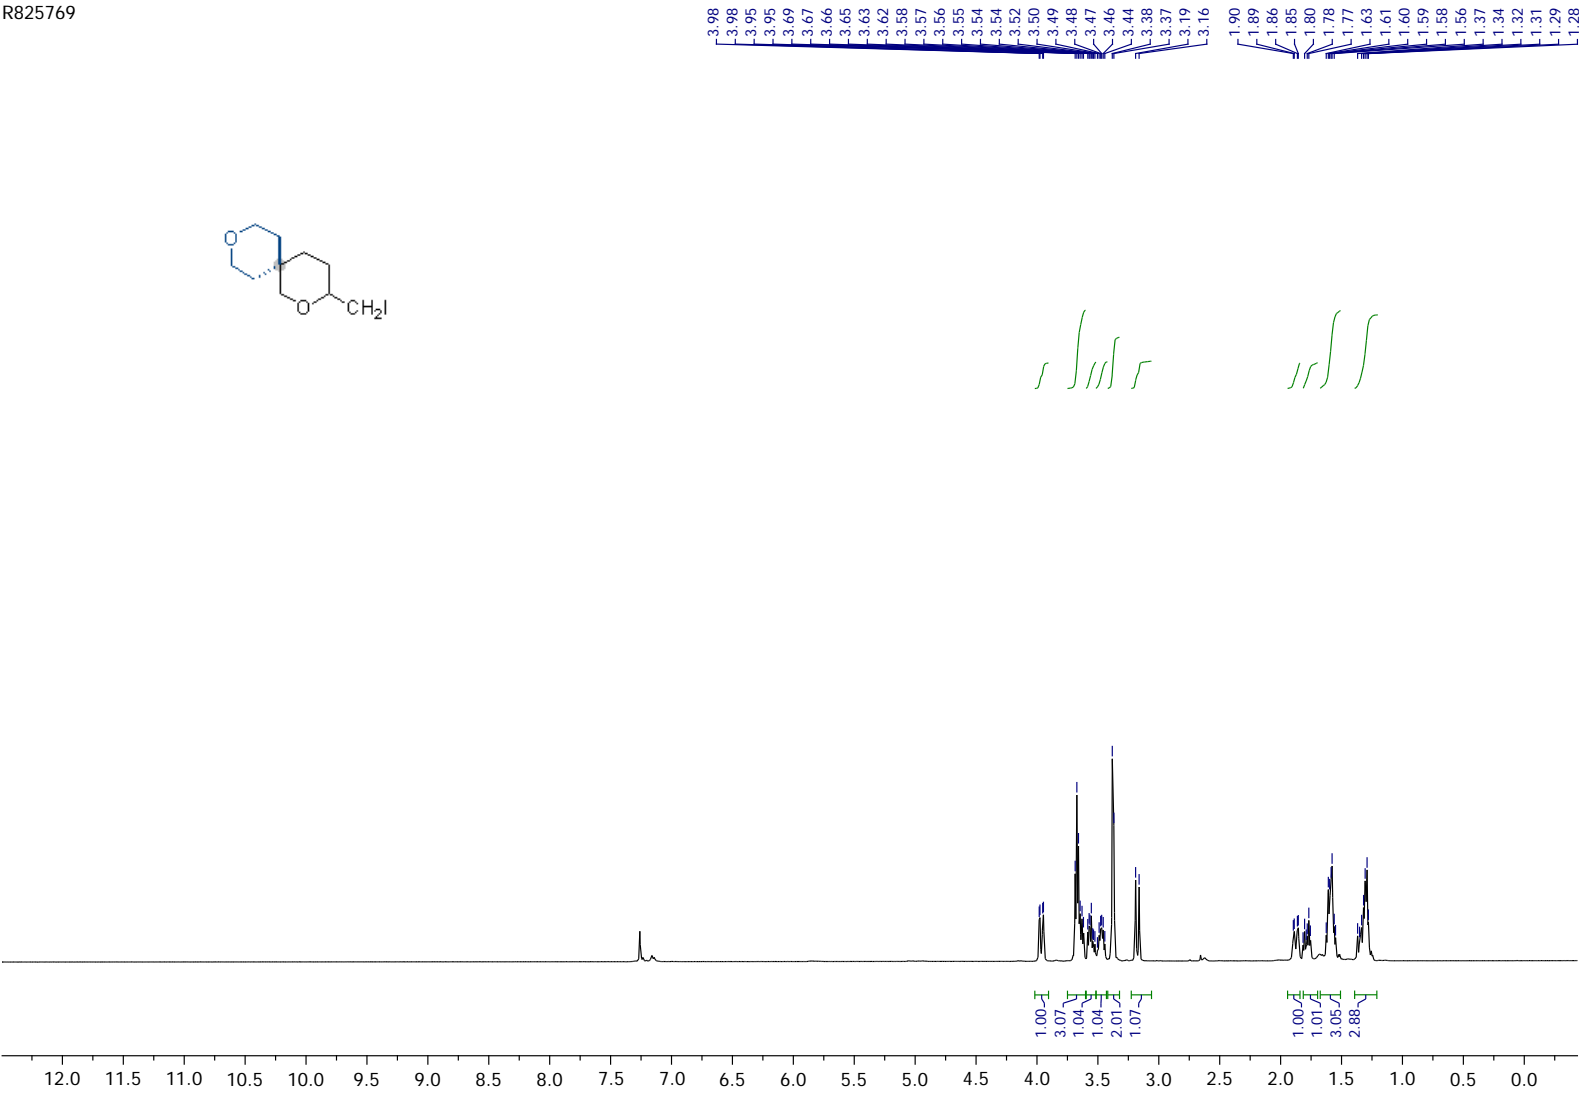

R825769\_C13

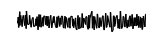

210 200 190 180 170 160 150 140 130 120 110 100 90 80 70 60 50 40 30 20 10 0

Compound 37a

R1185038

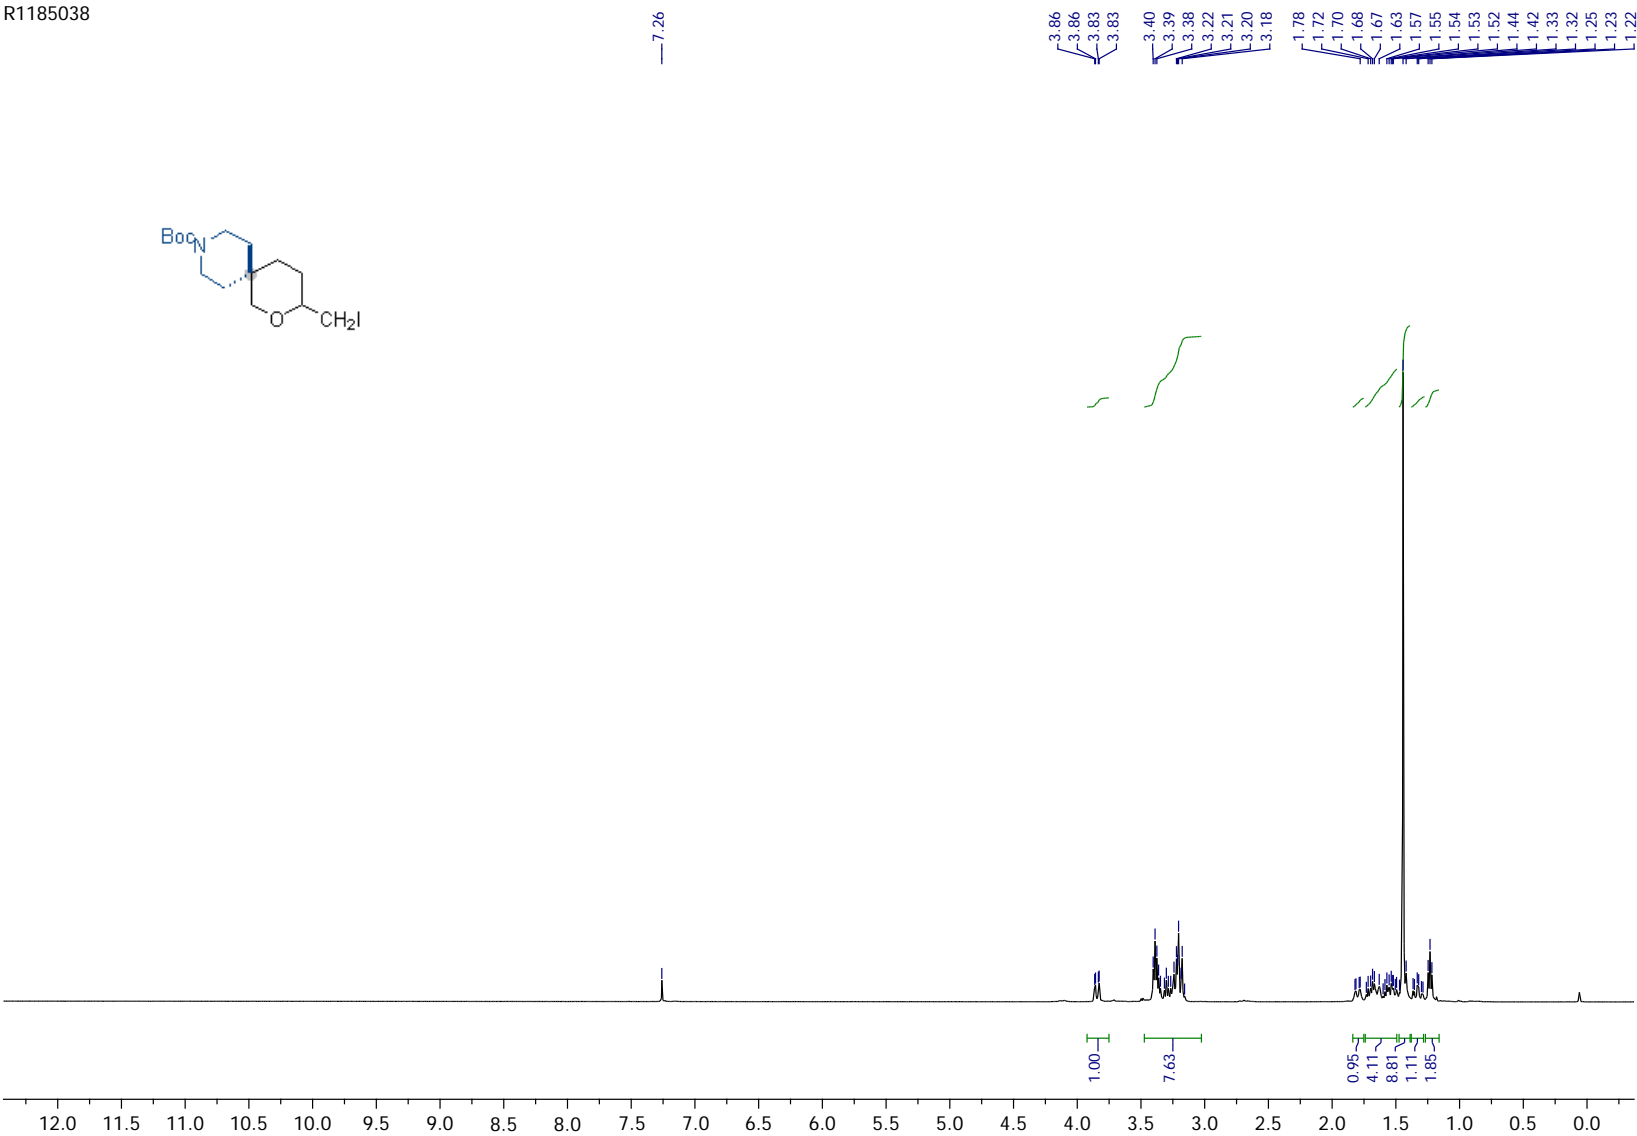

R1185038\_C13

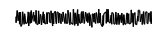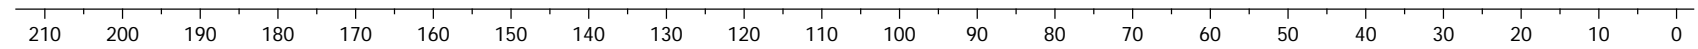

Compound 38a

R1782101

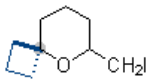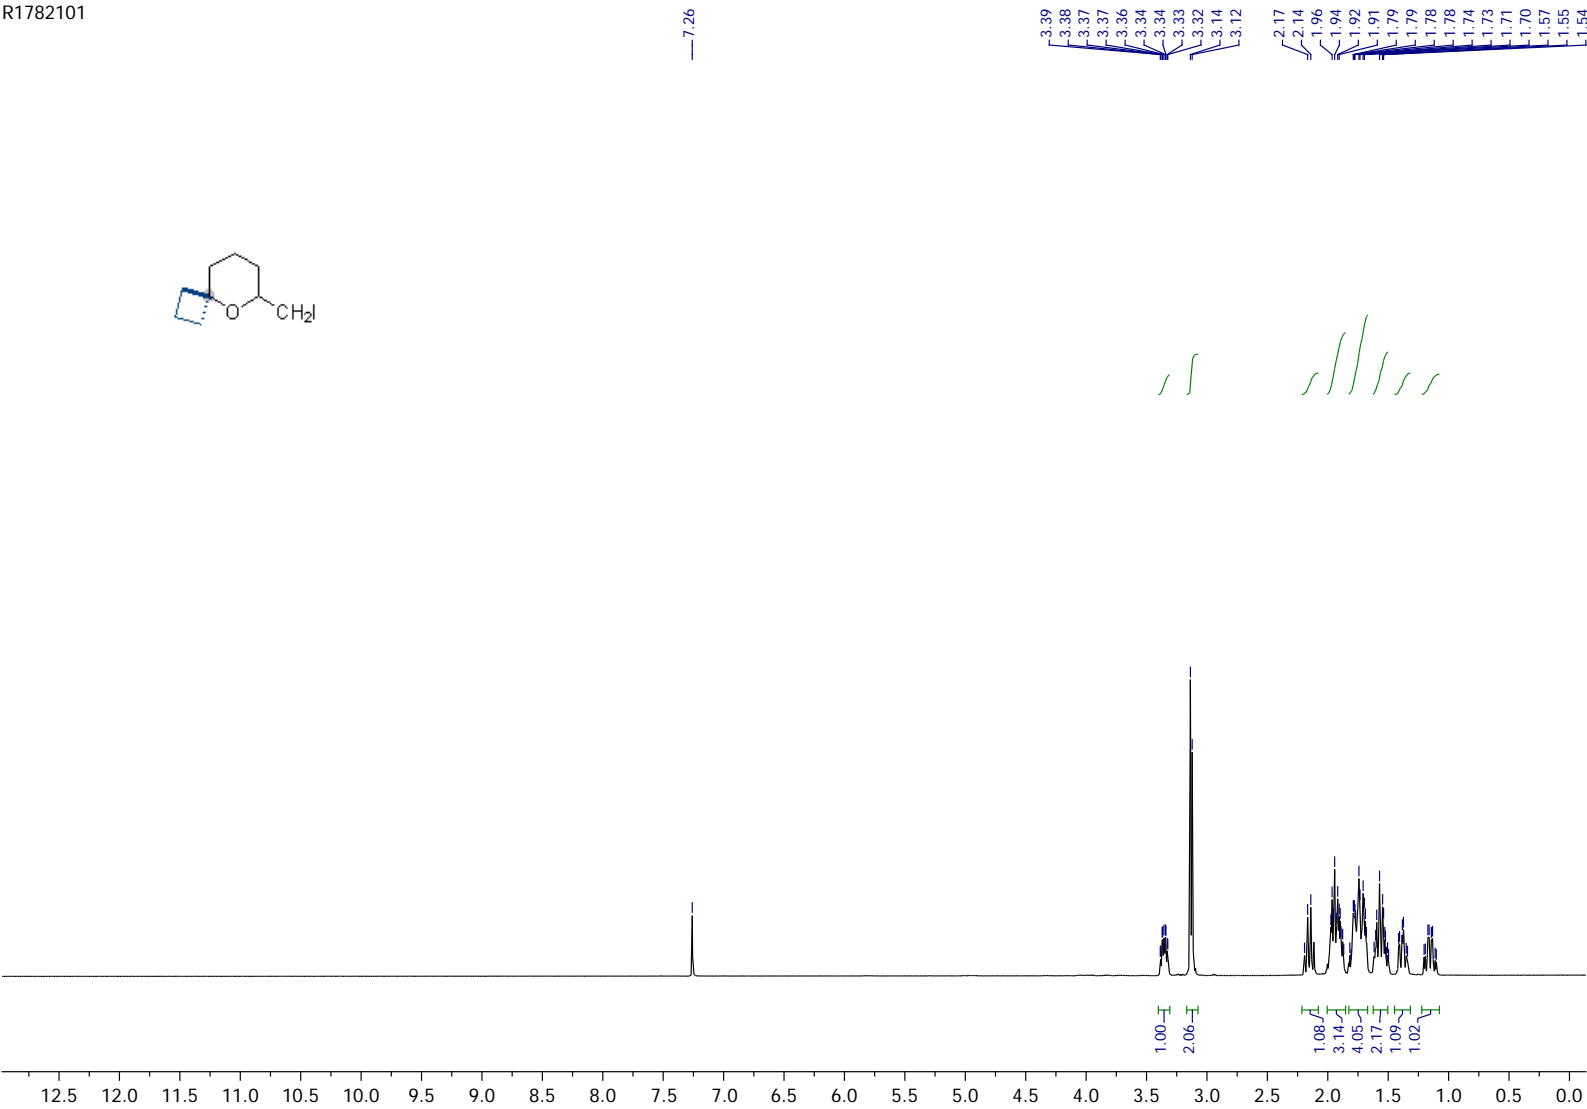

R1782101\_C13

11/11/2011 11:11:11

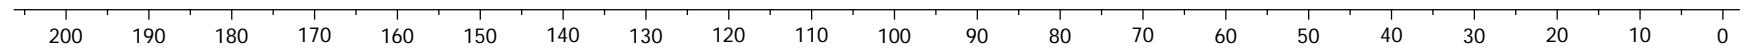

Compound 39a

R1745136

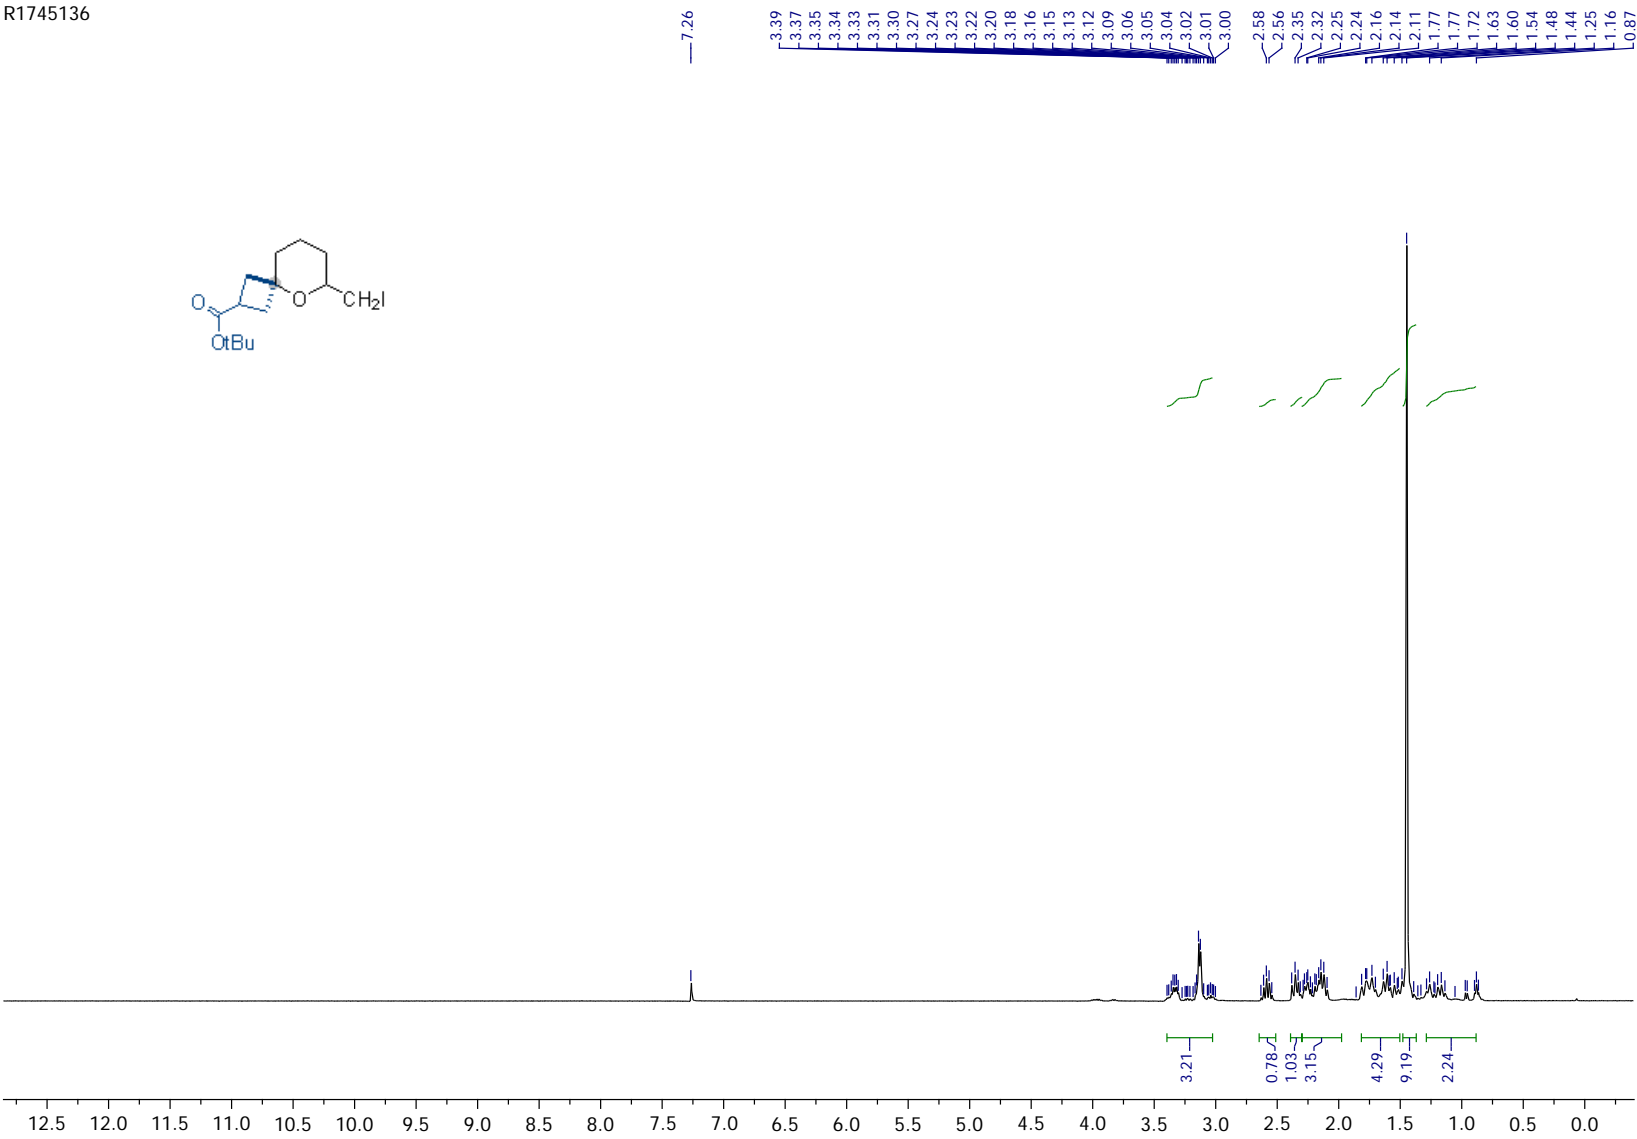

R1745136\_C13

175.40  
174.19

80.39  
80.31  
77.16  
73.48  
72.10  
71.95

38.49  
37.72  
34.93  
34.61  
33.66  
33.03  
31.73  
31.04  
30.86  
28.20  
20.11  
19.76  
10.19  
9.94

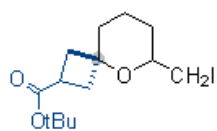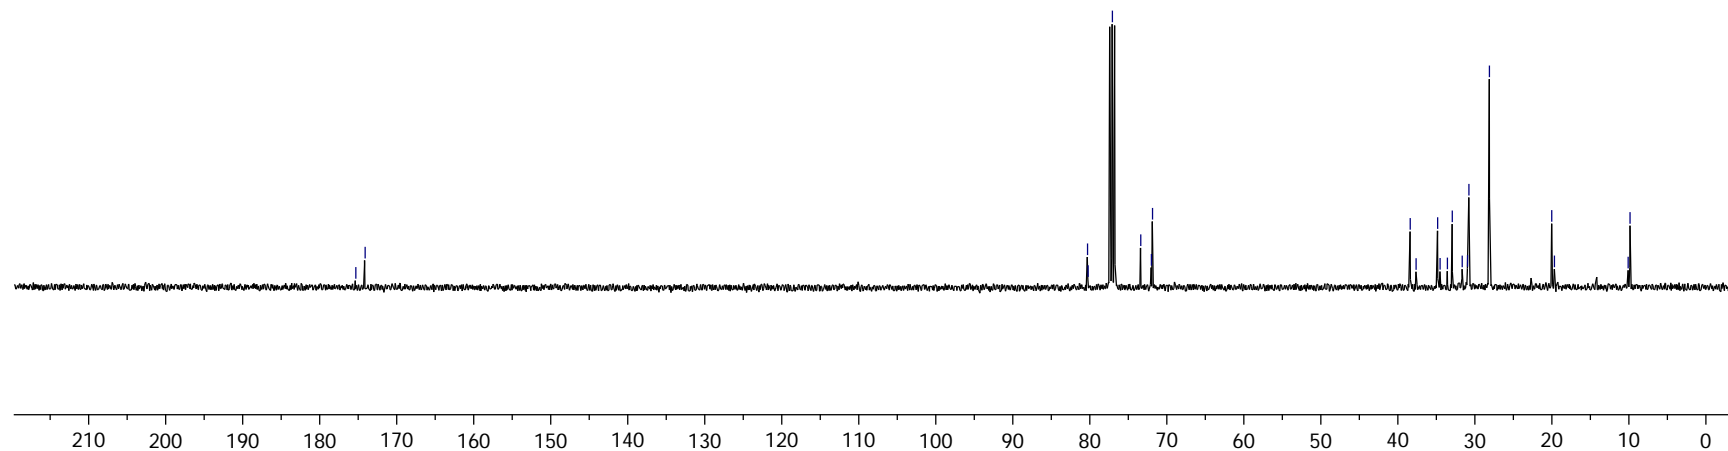



Compound 40a

R1721400

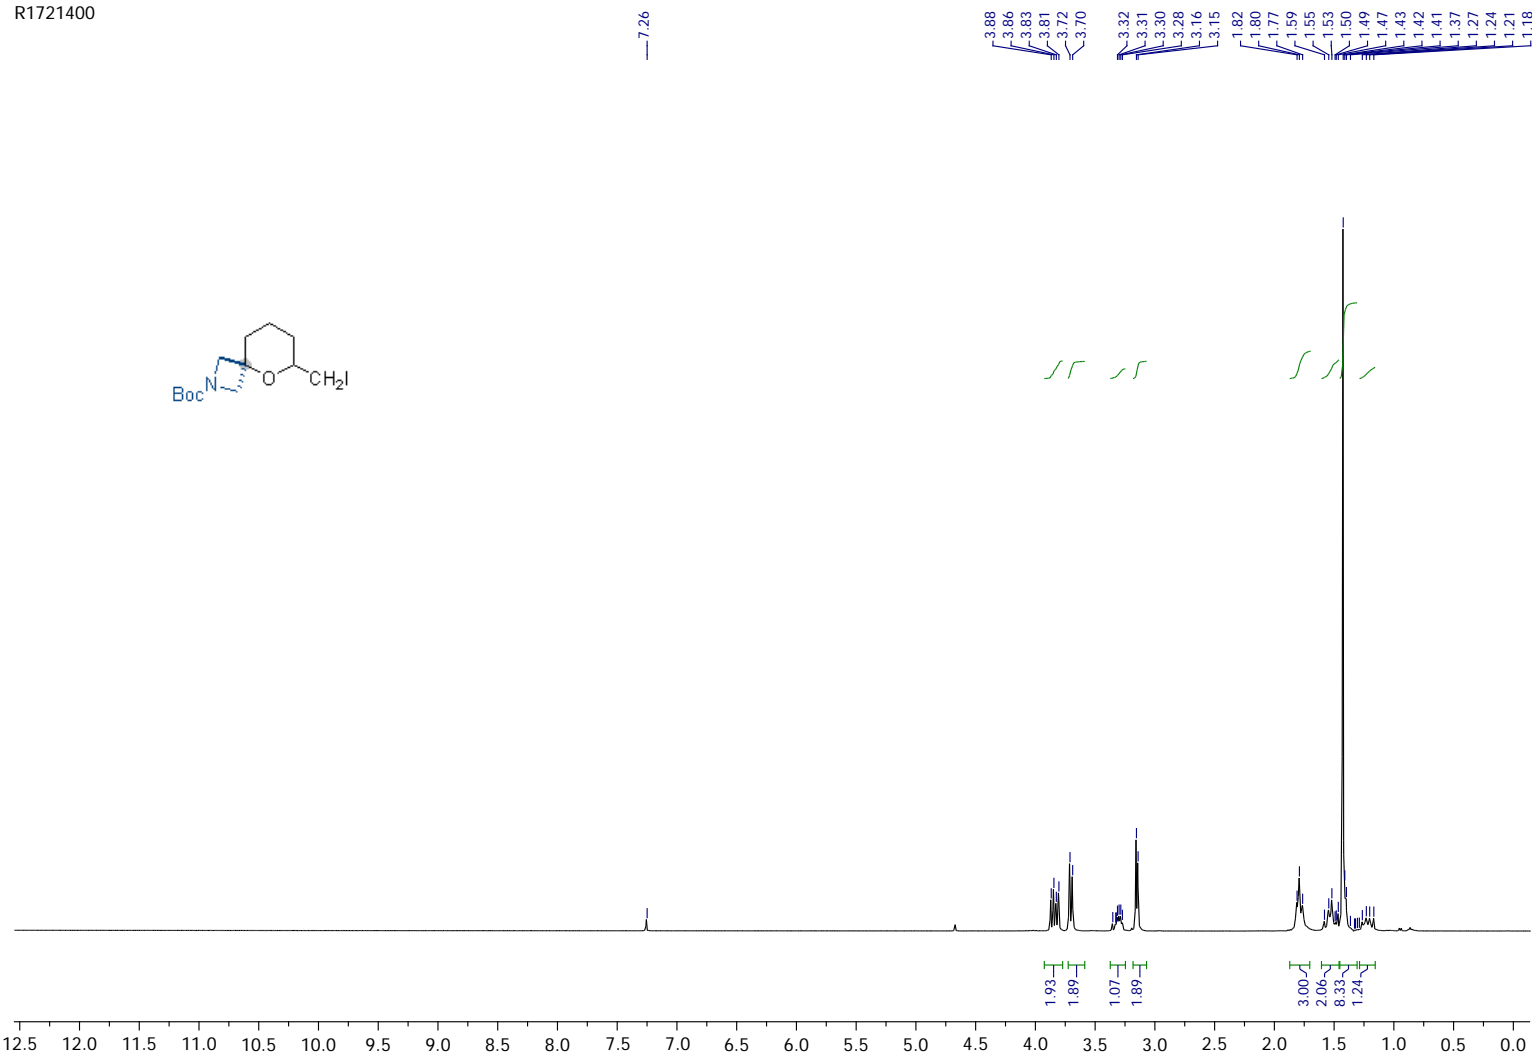

R1721400\_C13

\*\*\*\*\*

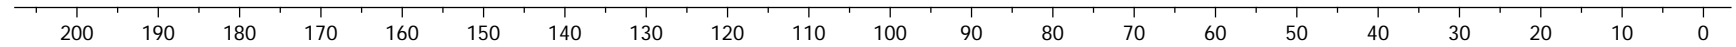

# Compound 41a

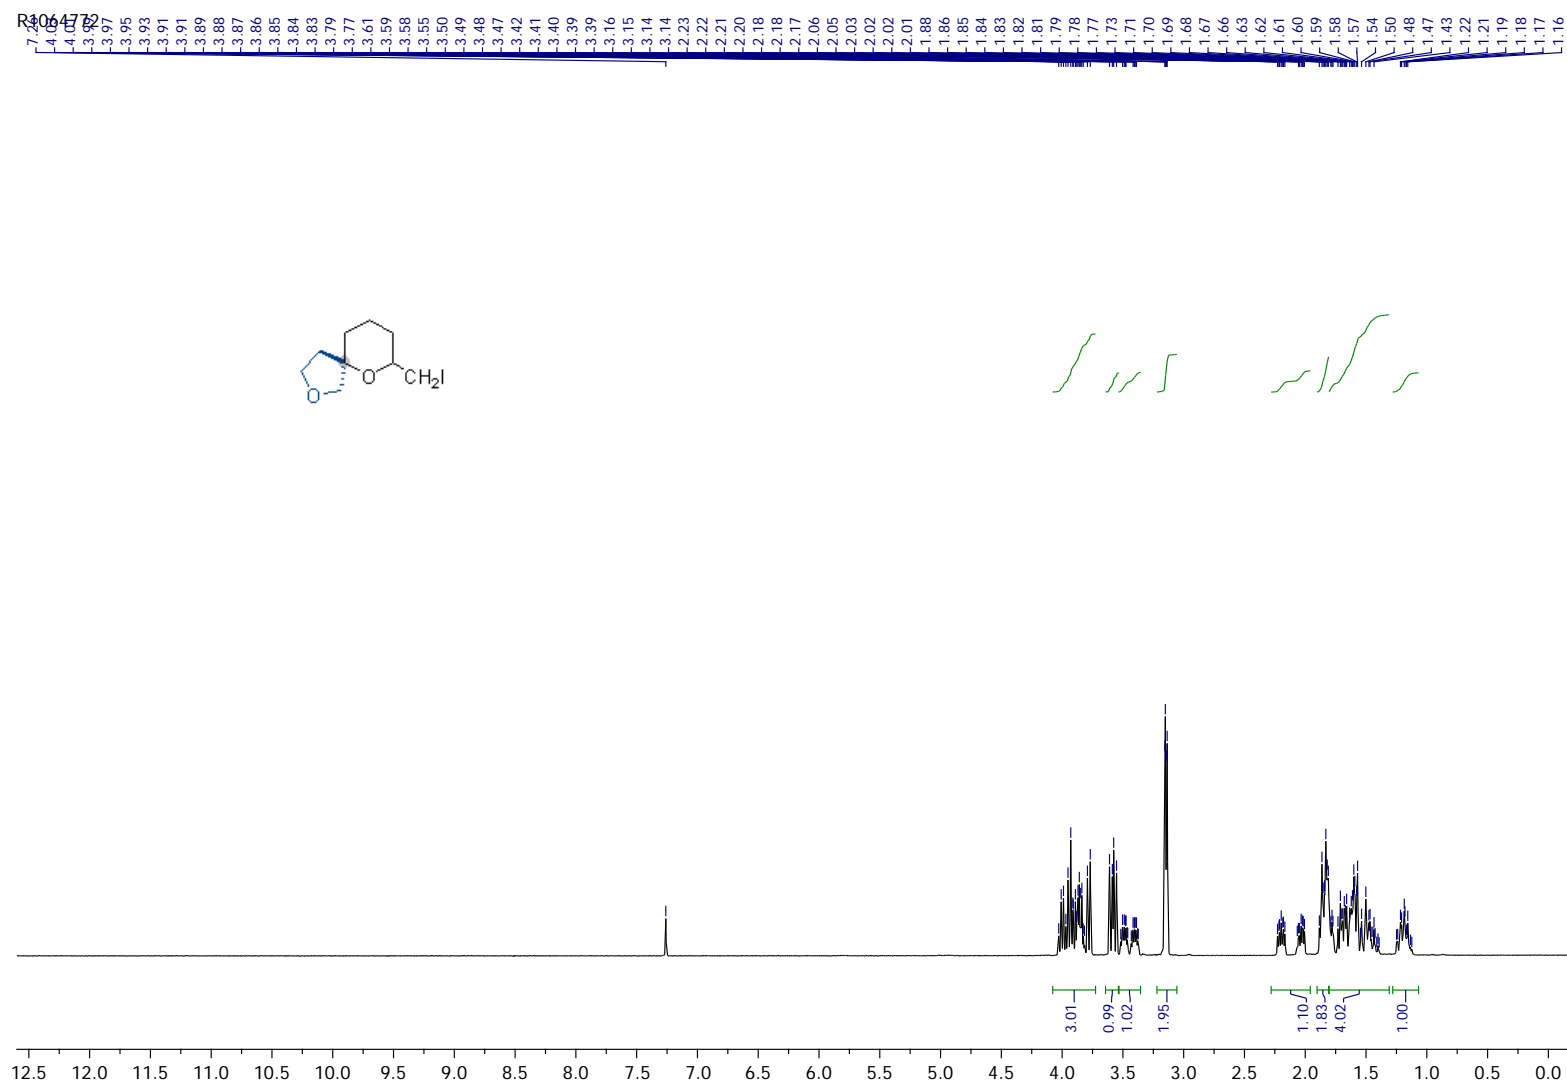

R1064772\_C13

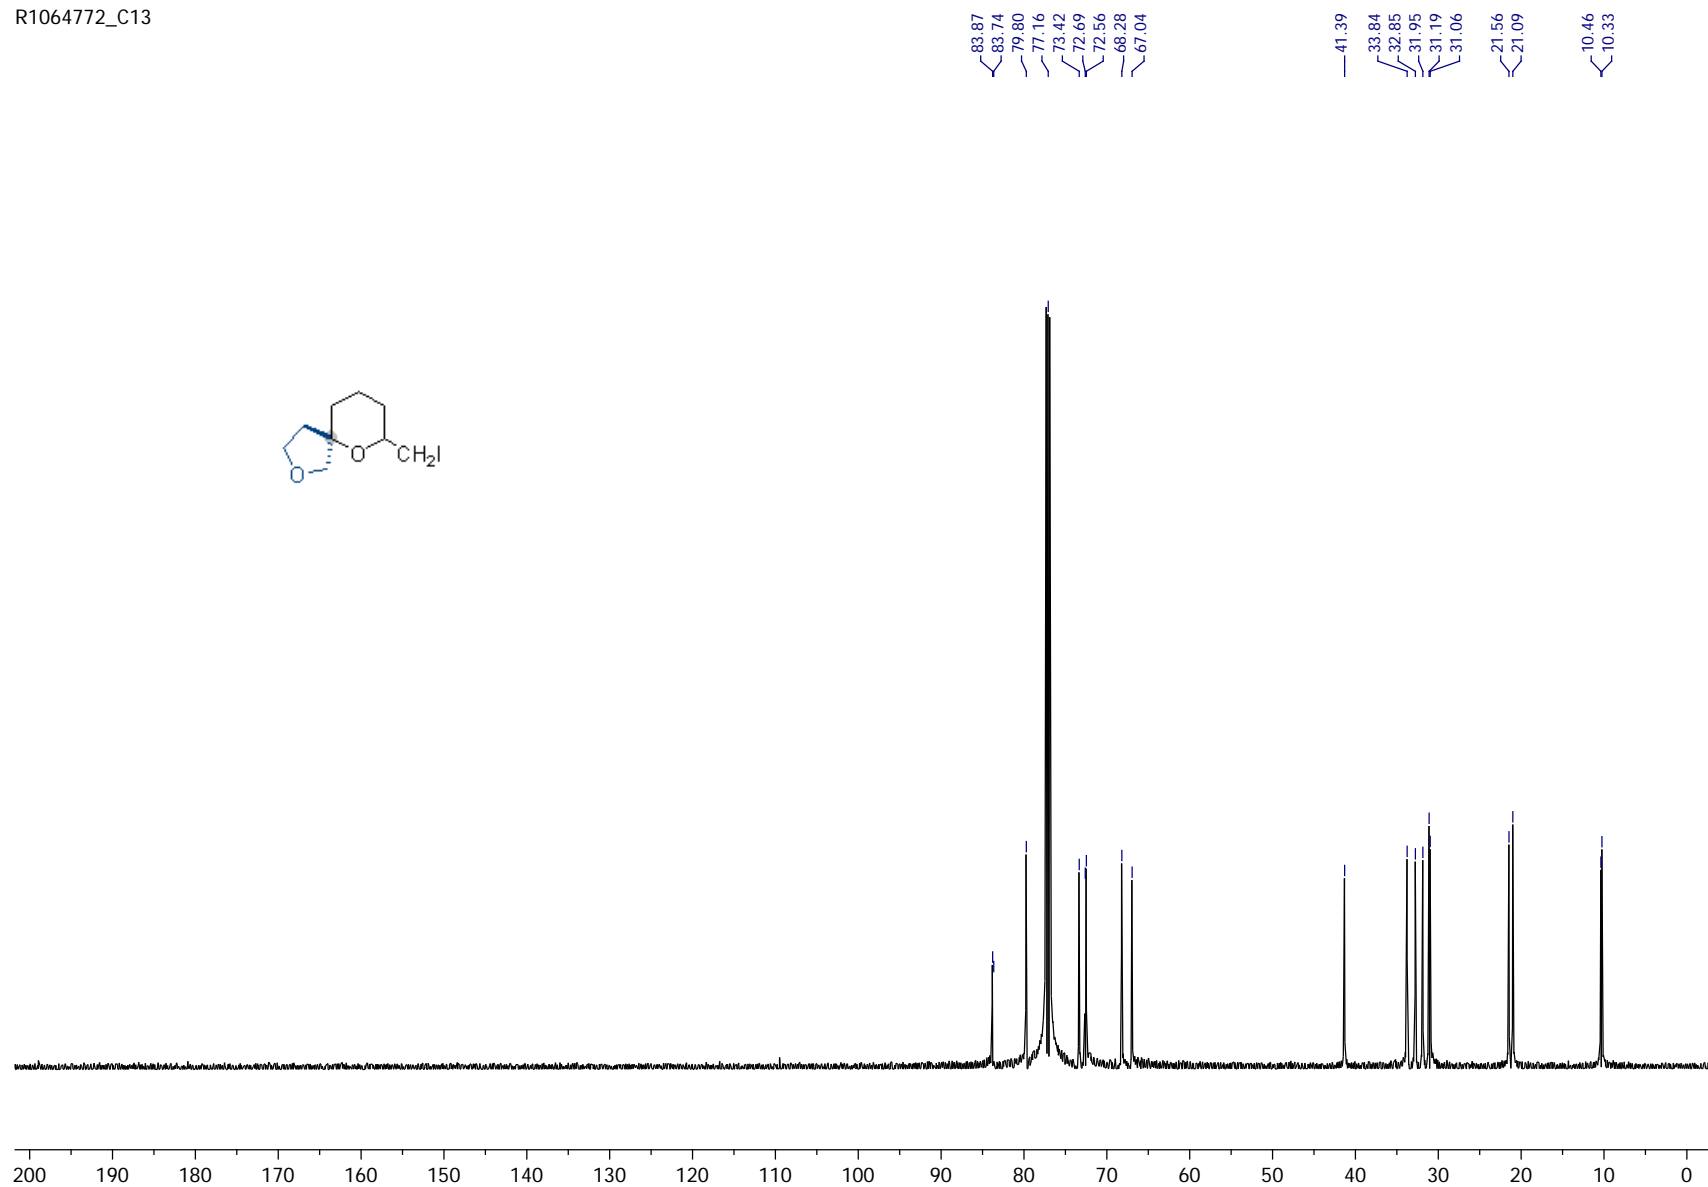

# Compound 42a

R1612985

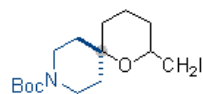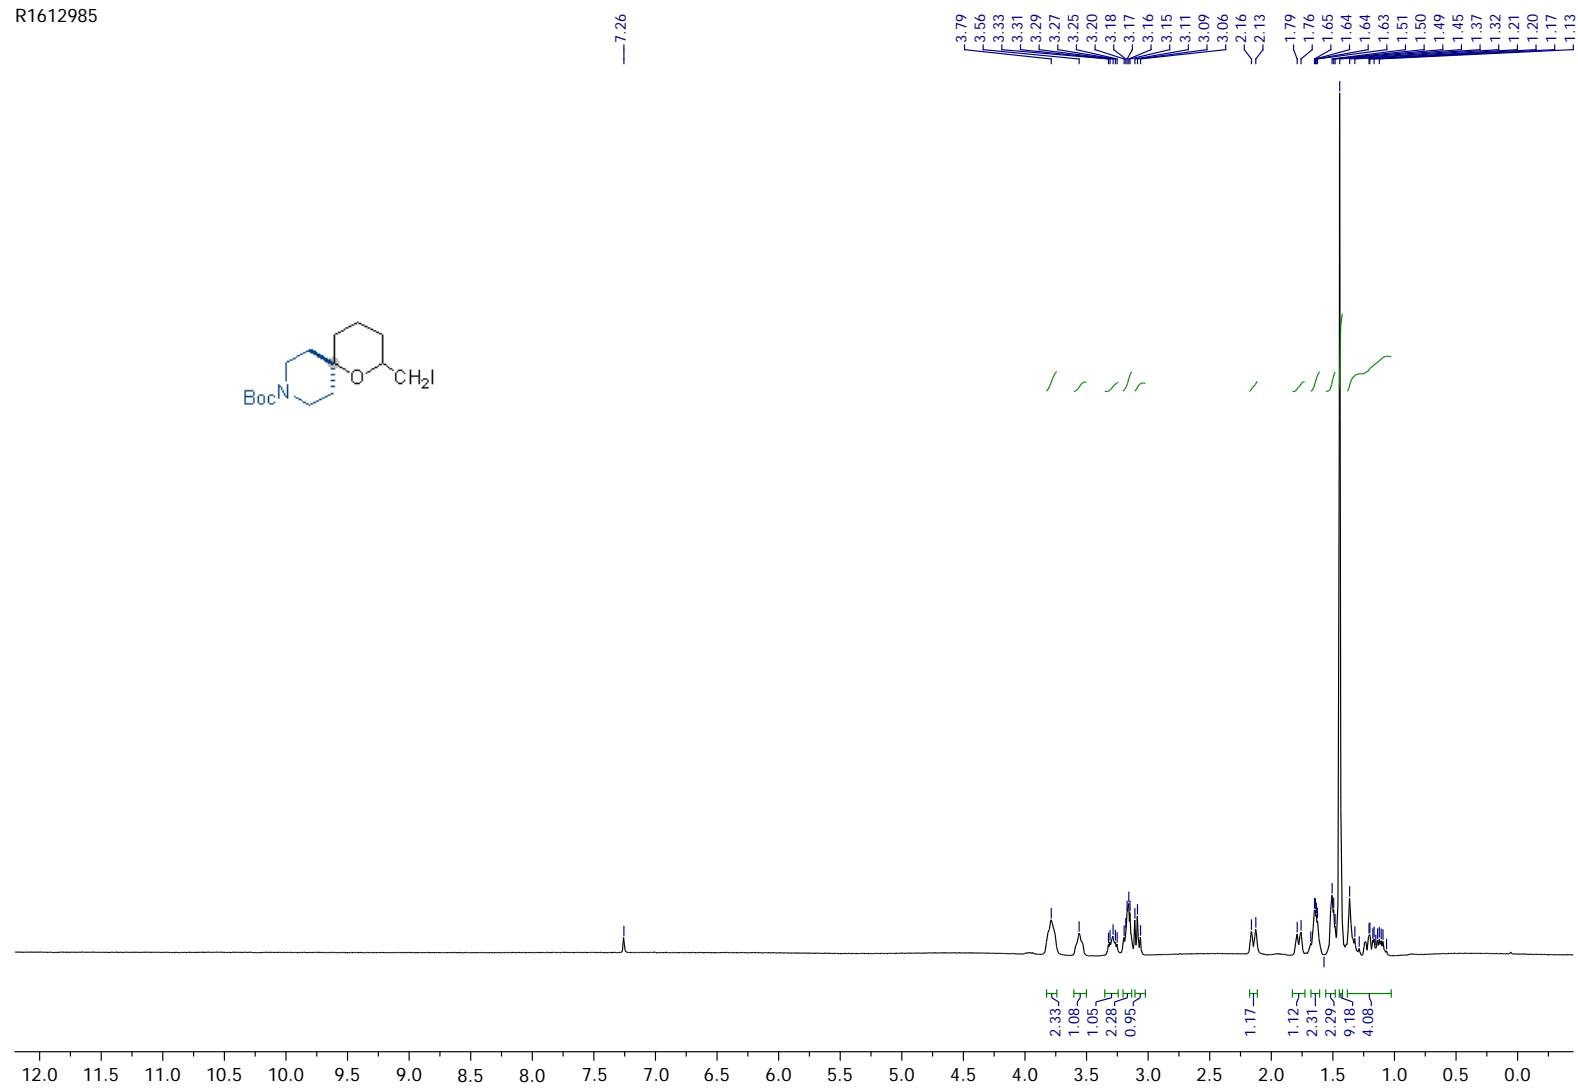

R1612985\_C13

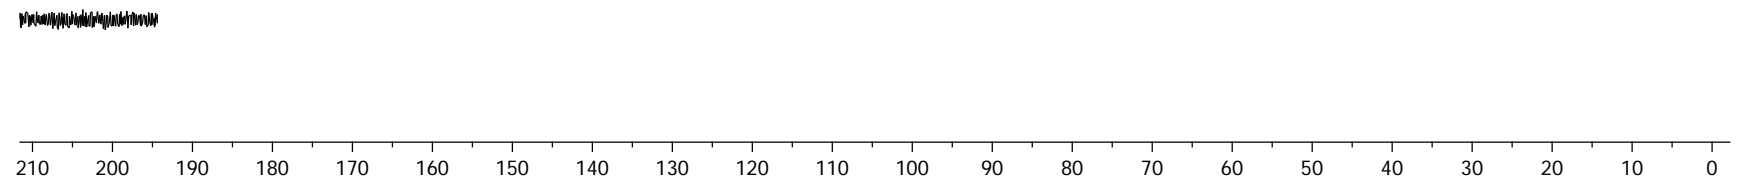

Compound 43a

R2389751

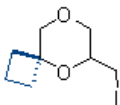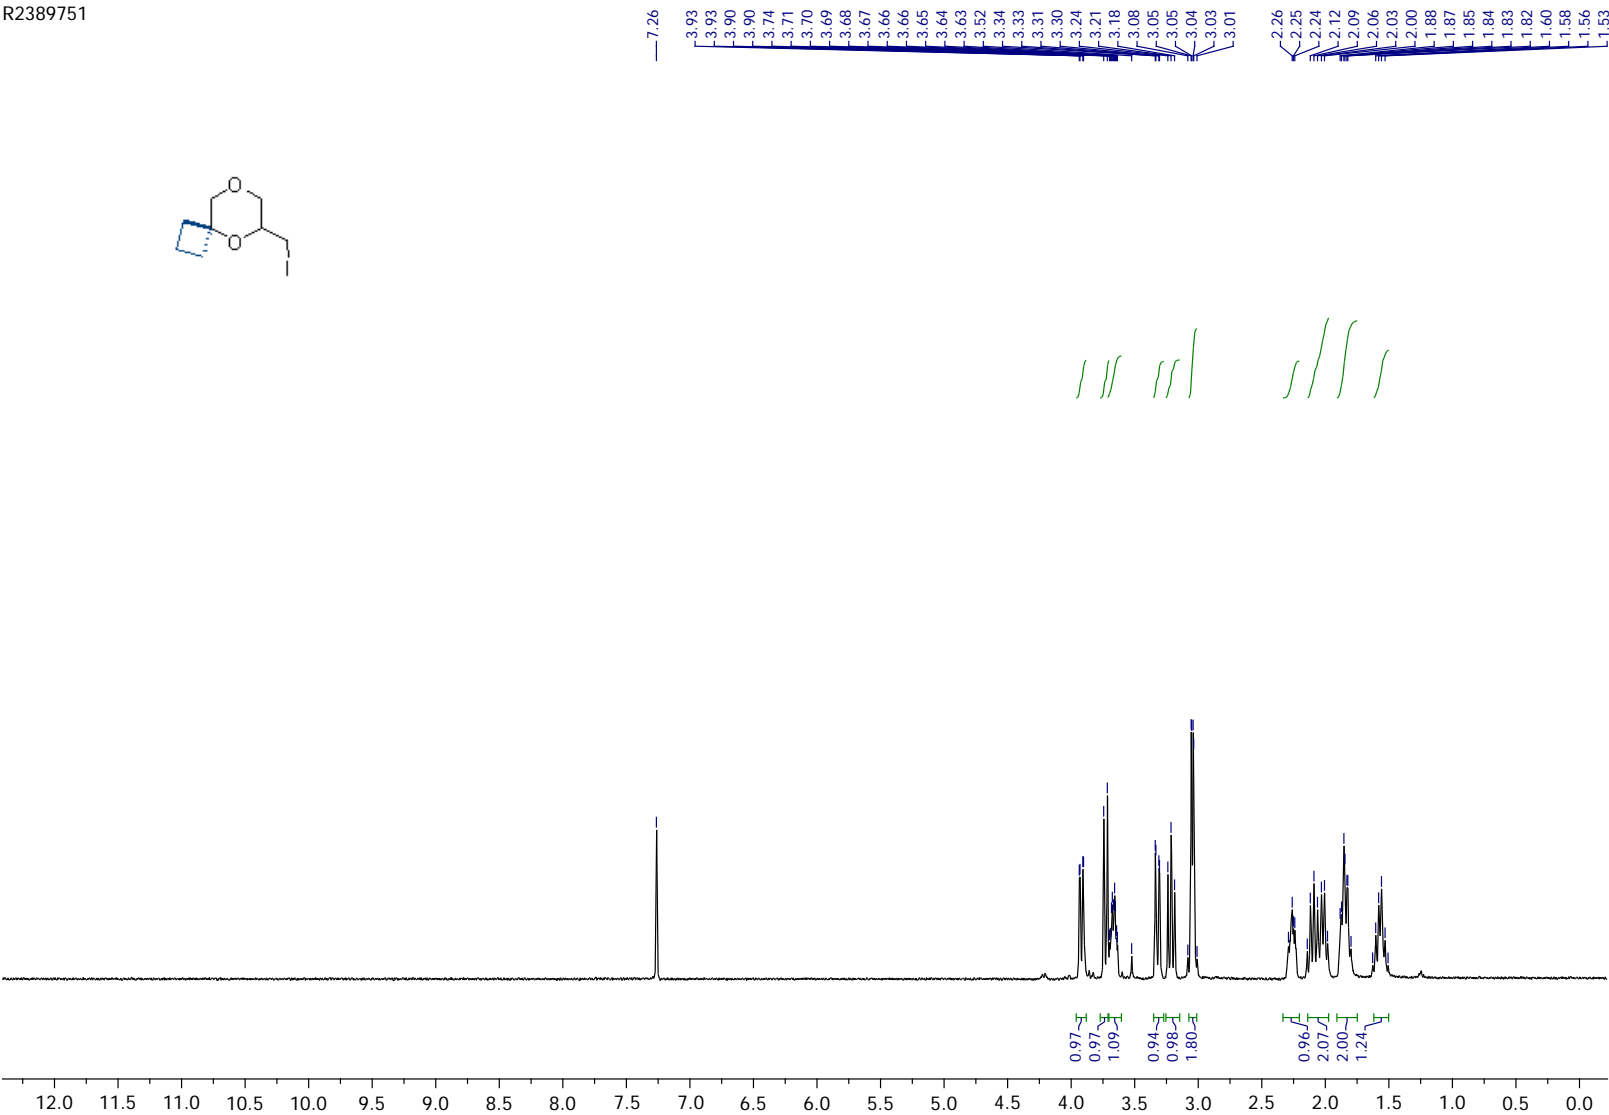

Compound 44a

R1787356

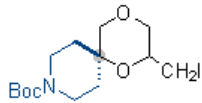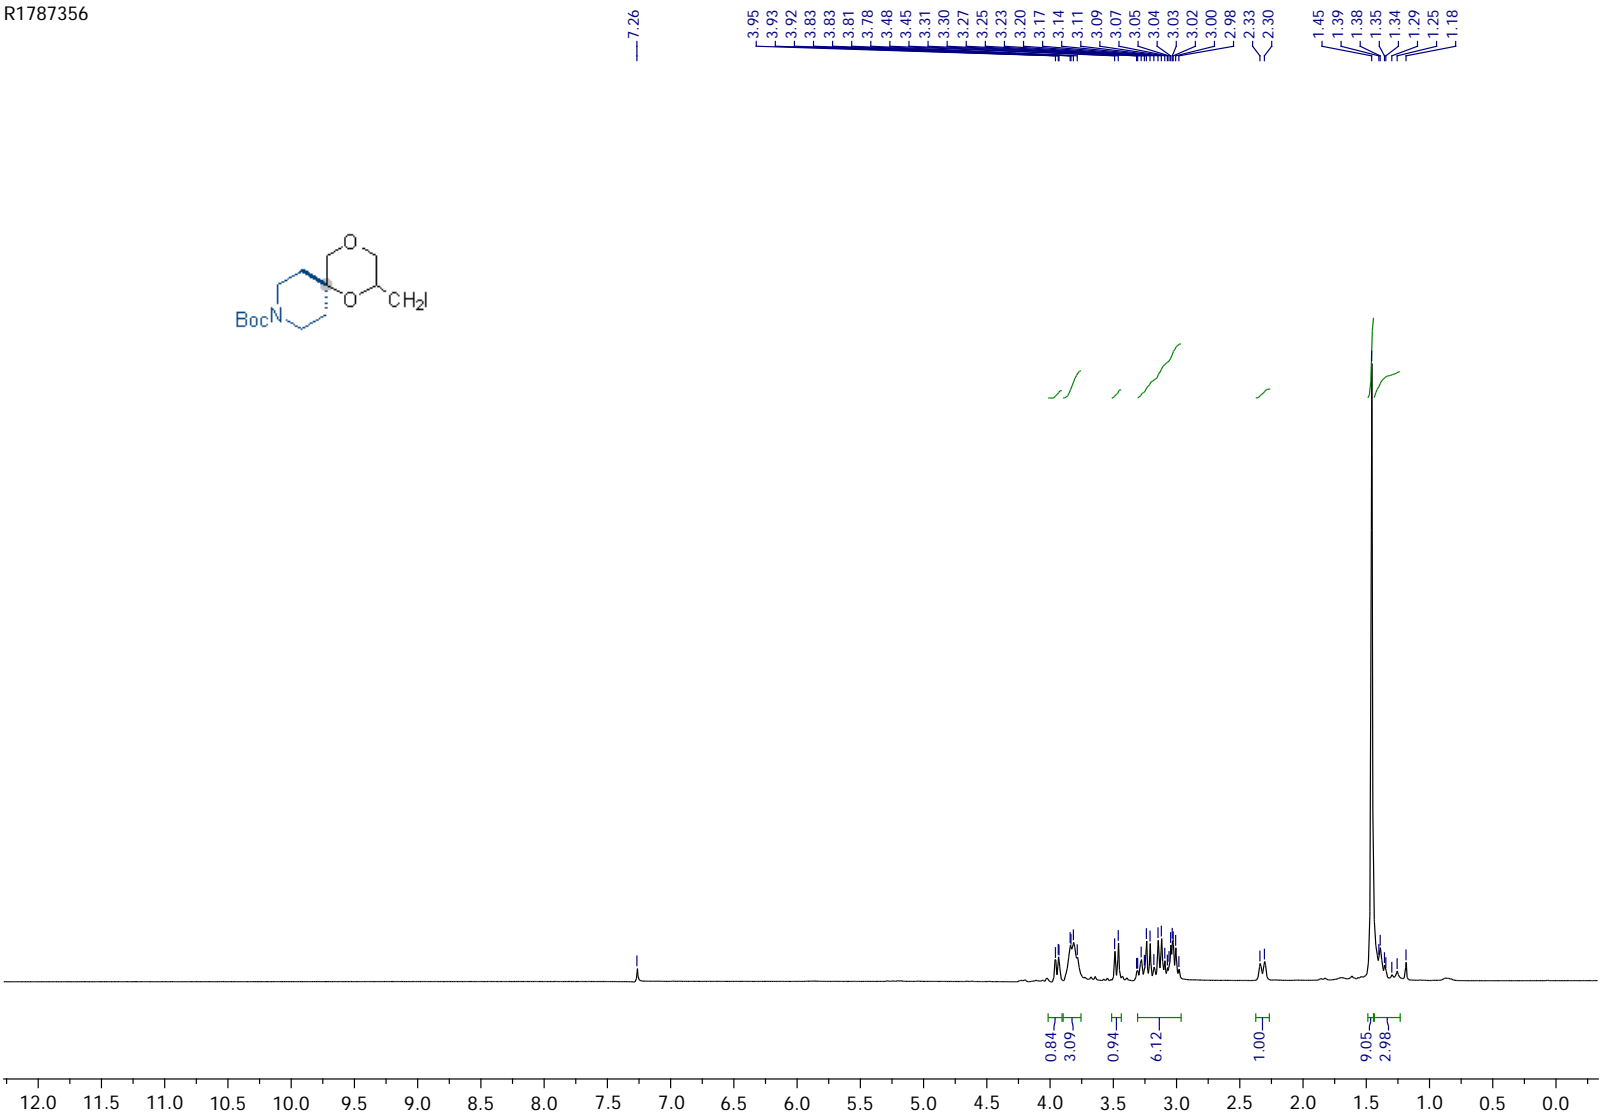





# Compound 45a

ywel3186

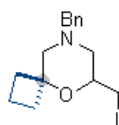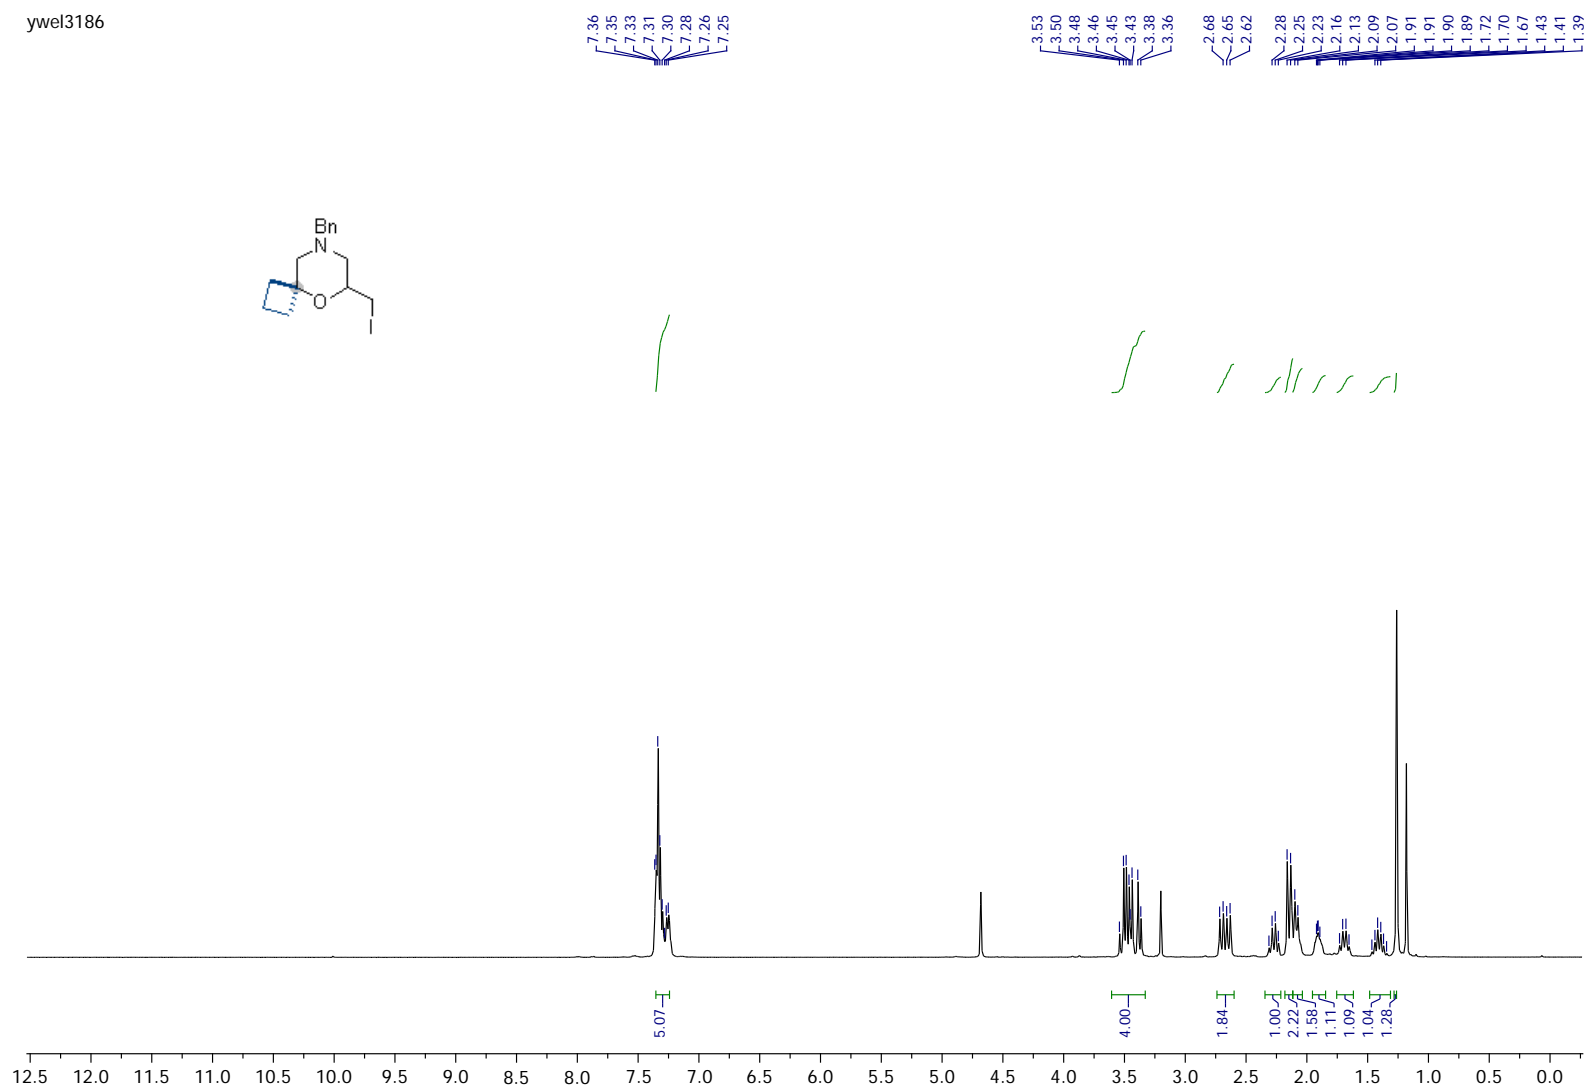

ywel3186-C13

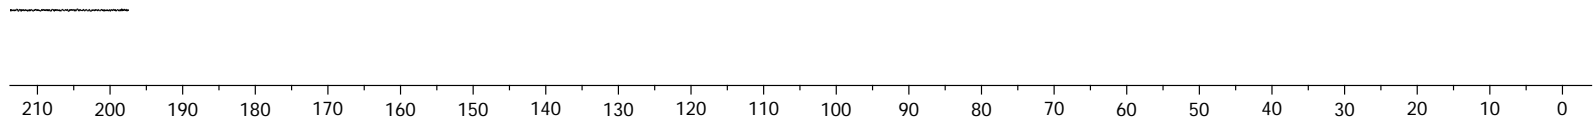

Compound 46a

ywel3748

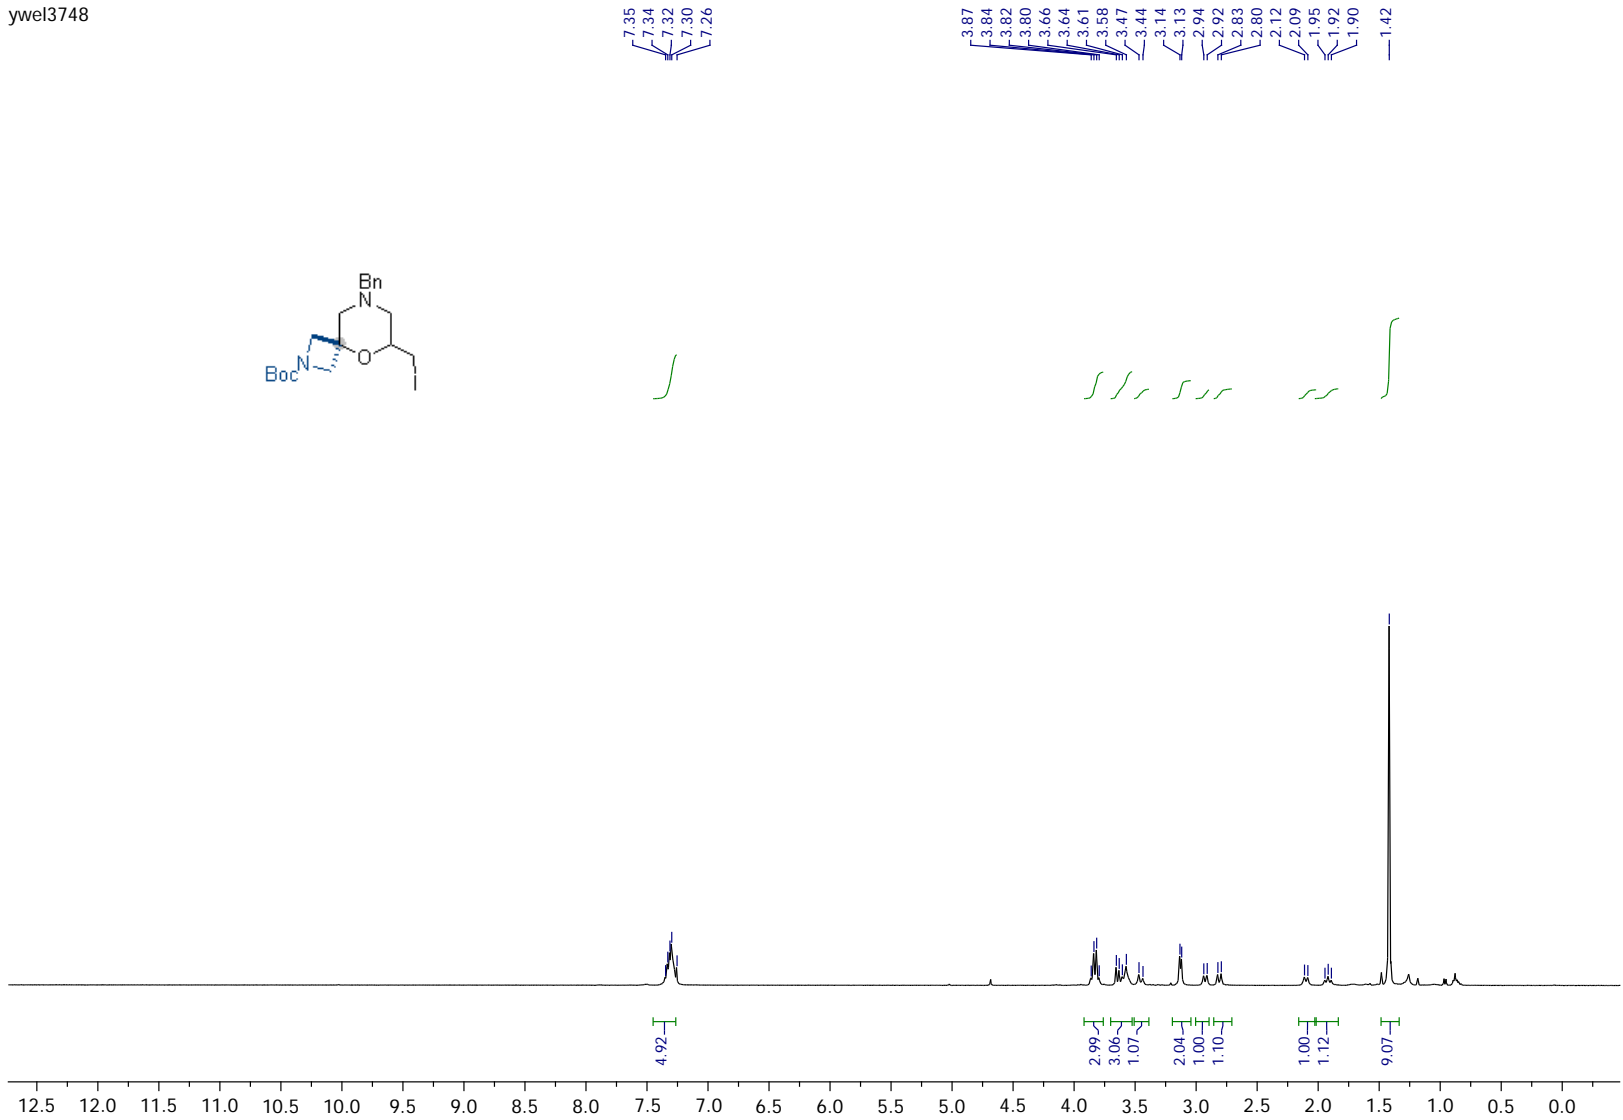

ywel3748\_C13

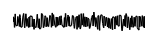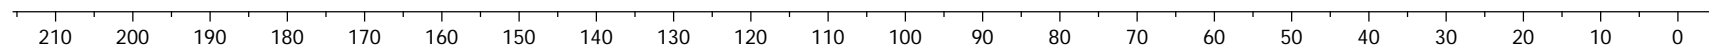

Compound 48a

ywel2947

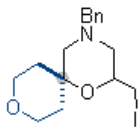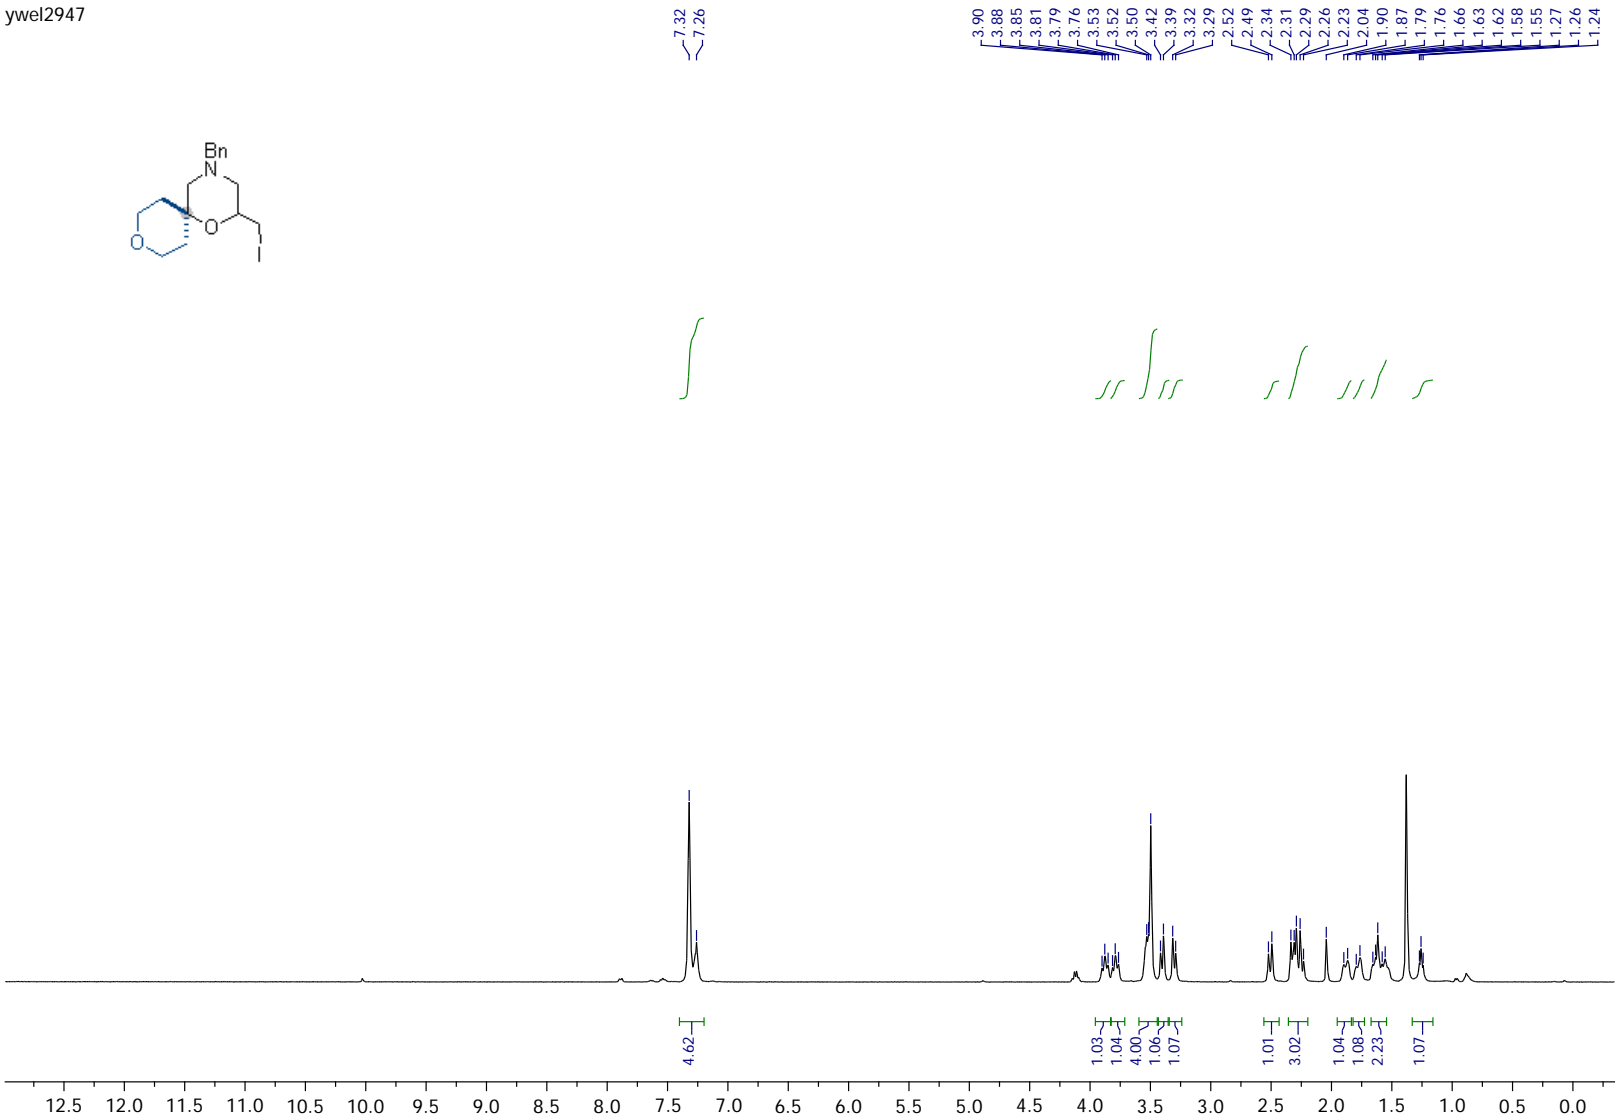

ywel2947\_C13

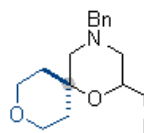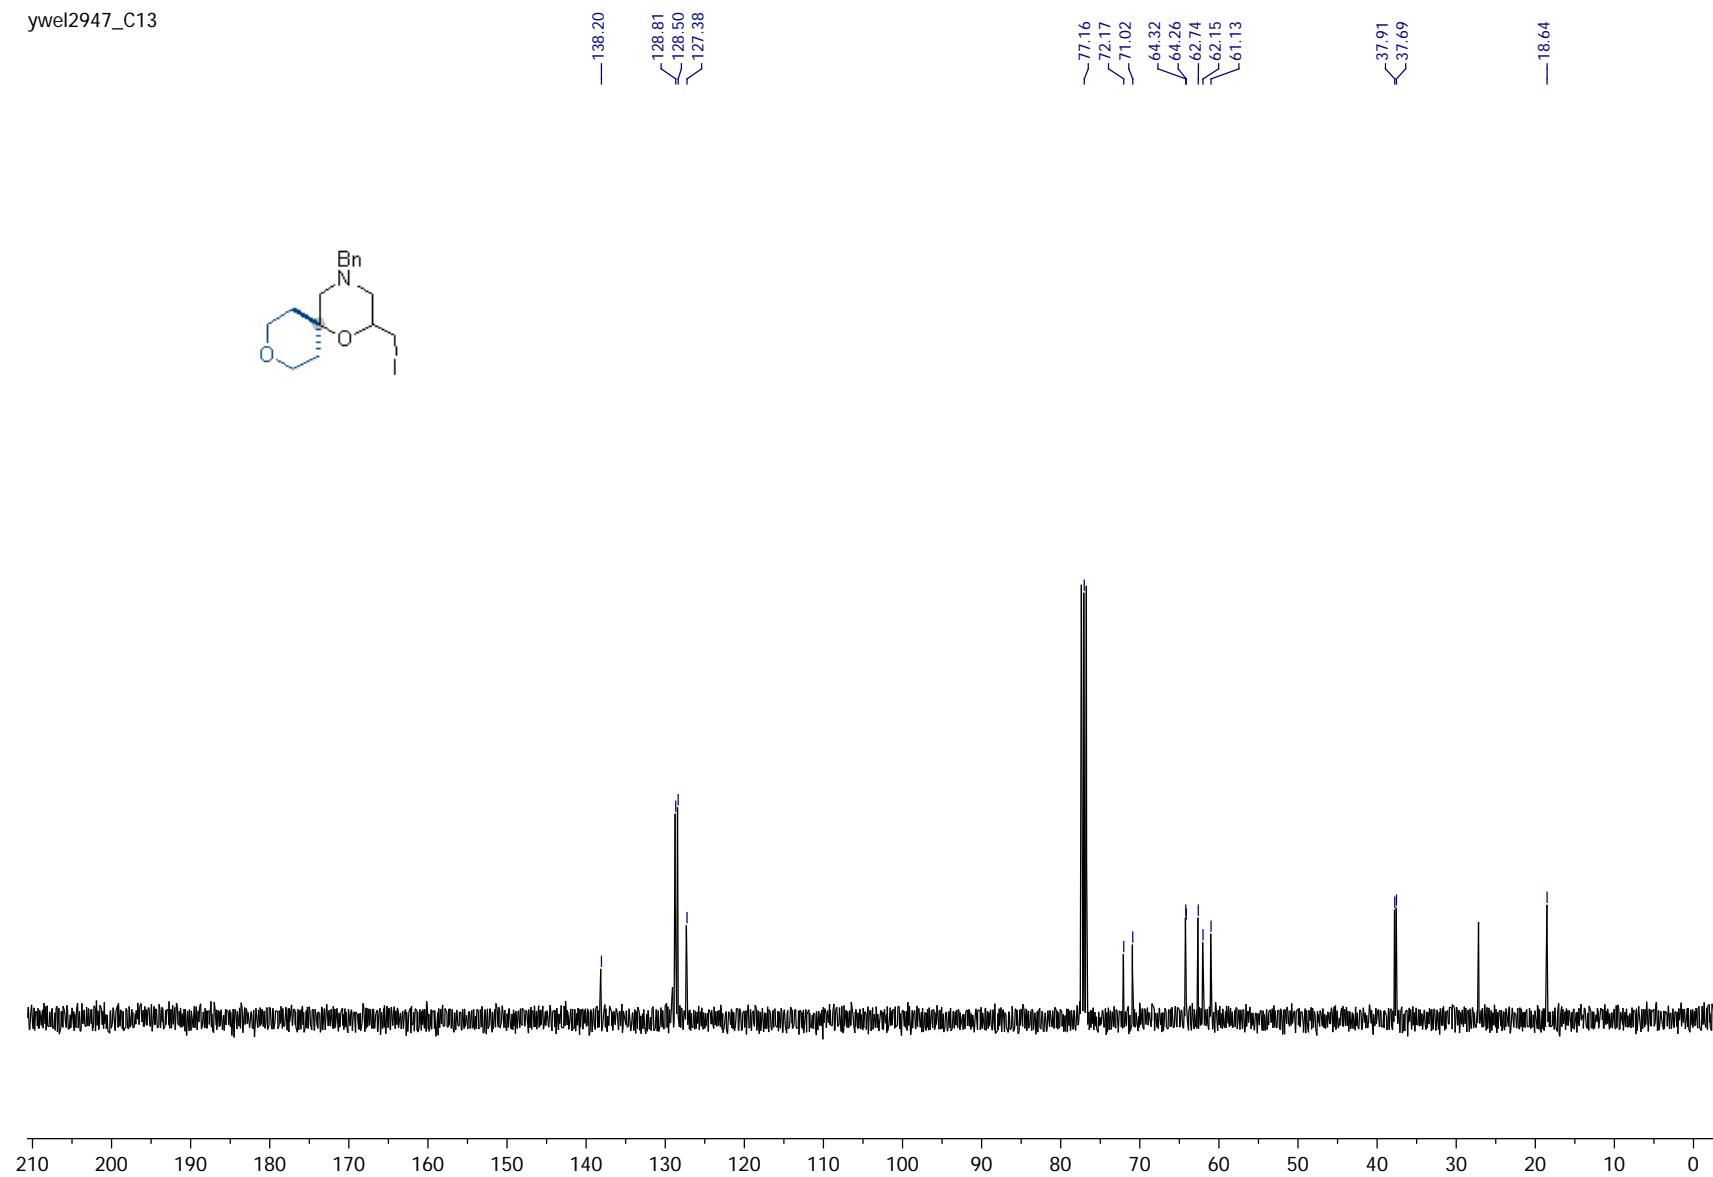

Compound 4b

R1726969

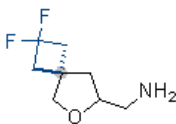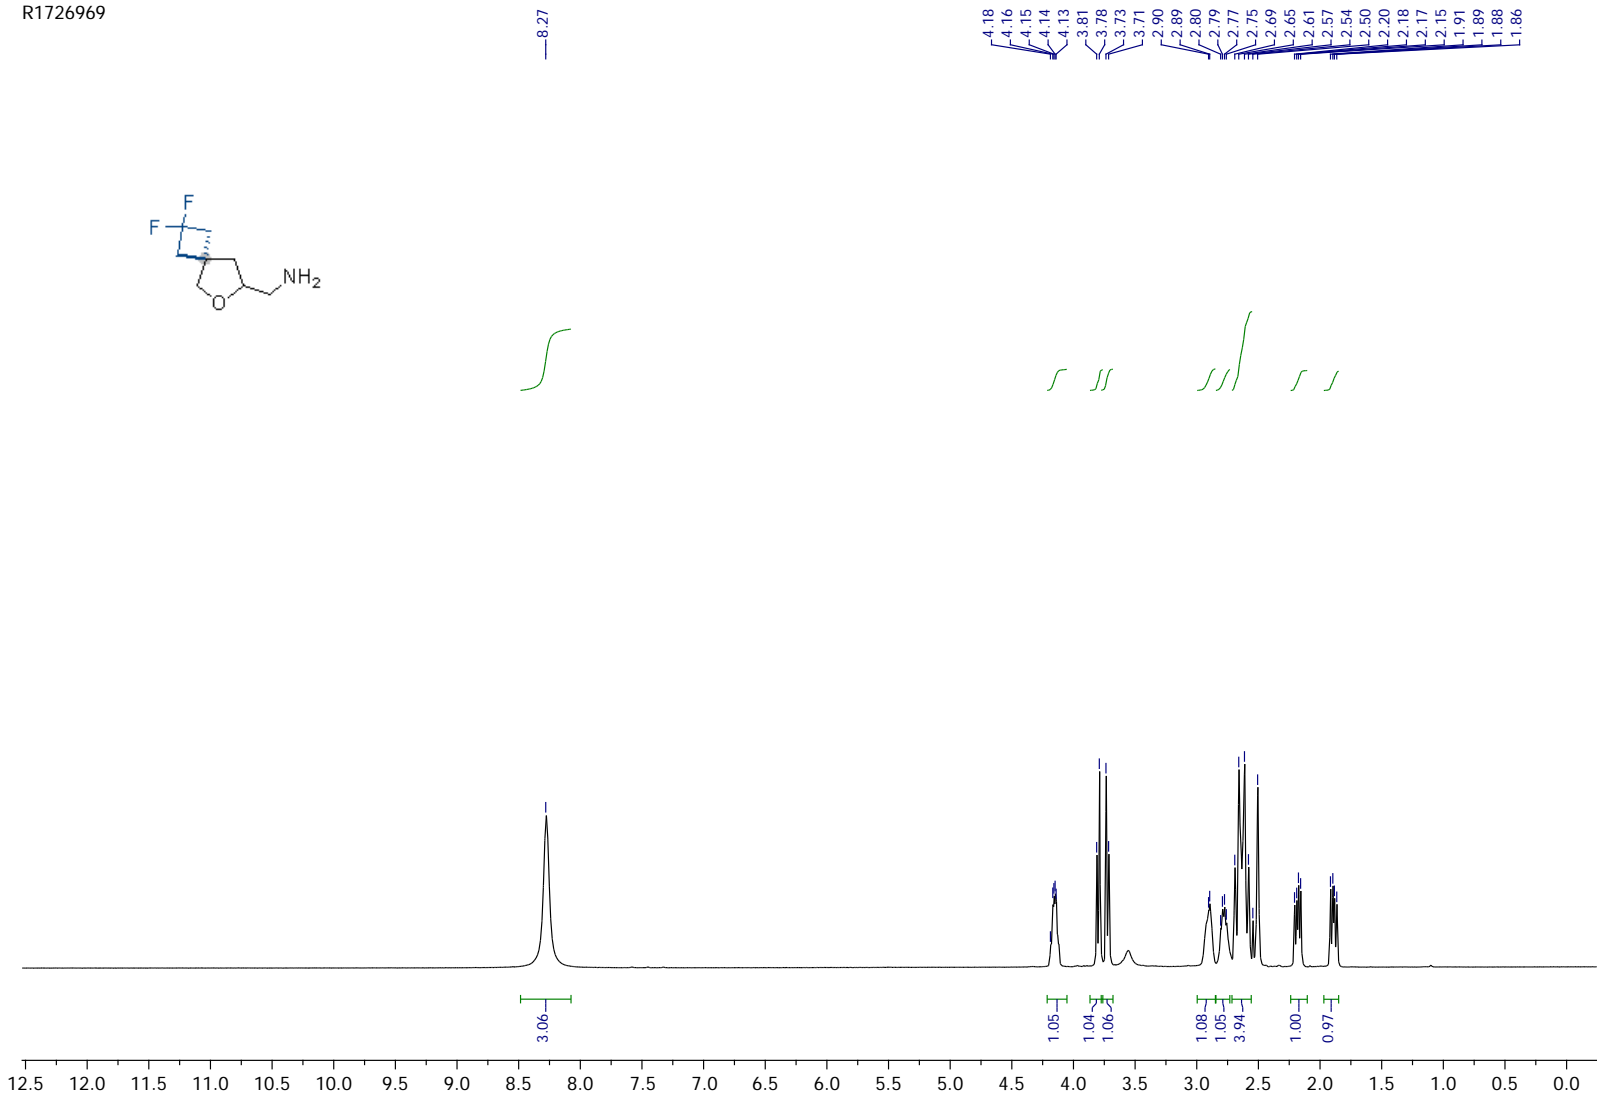





# Compound 5b

R1177628

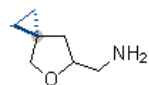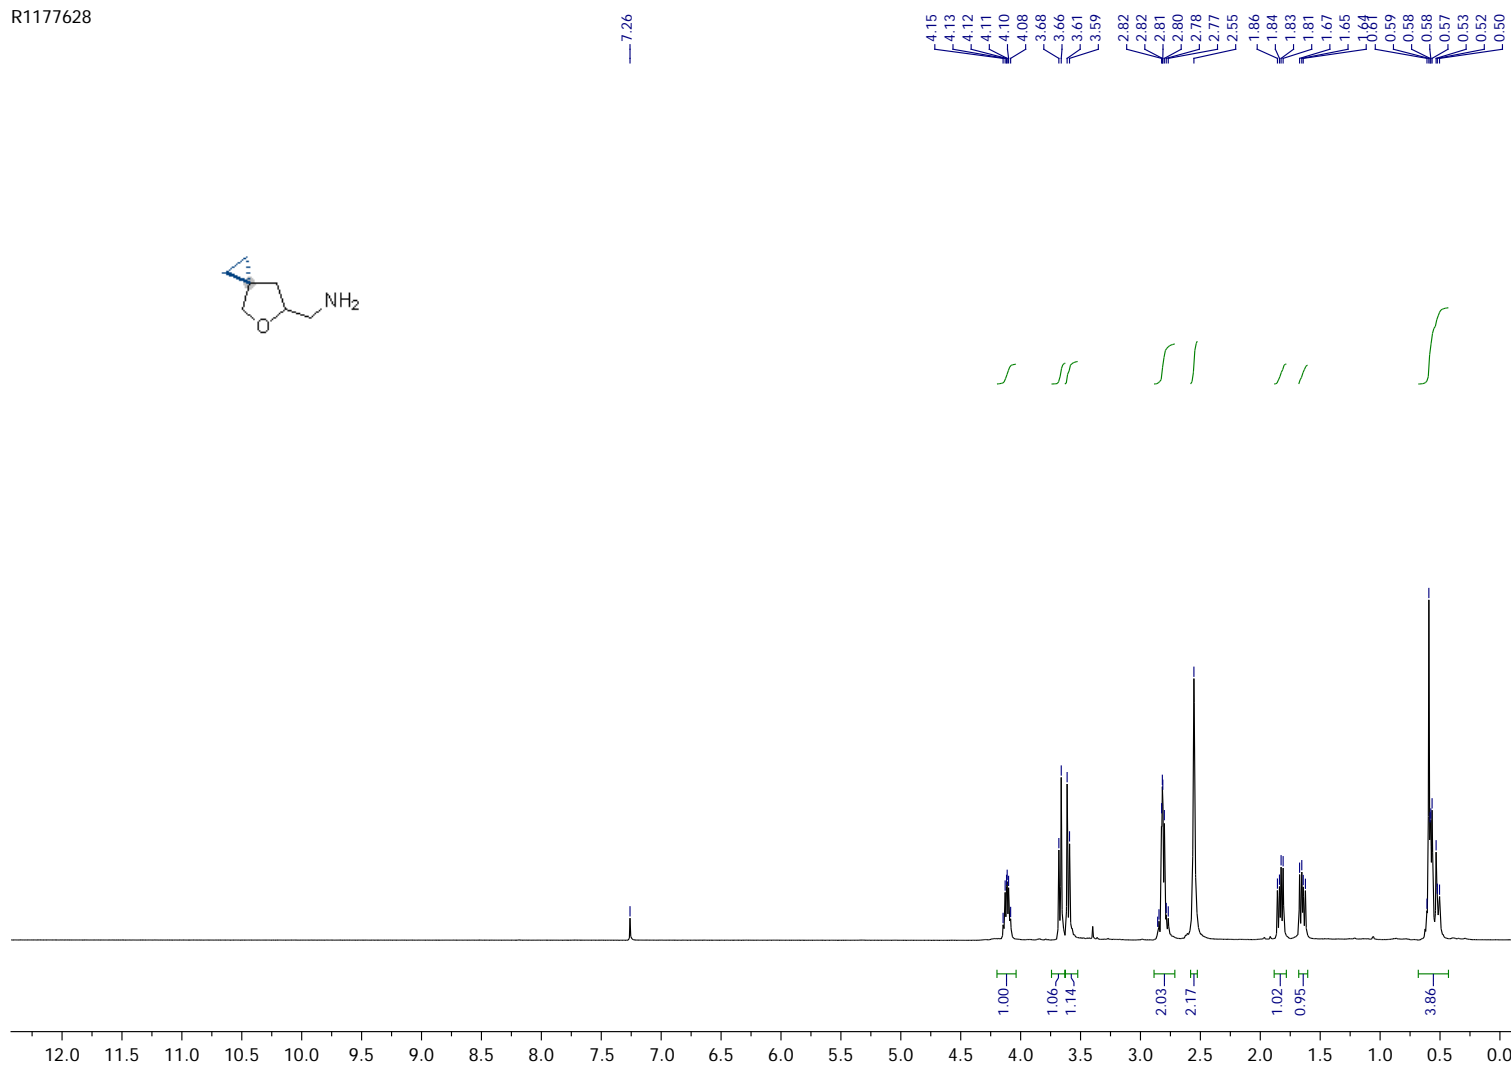

R1177628\_C13

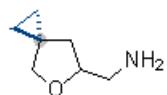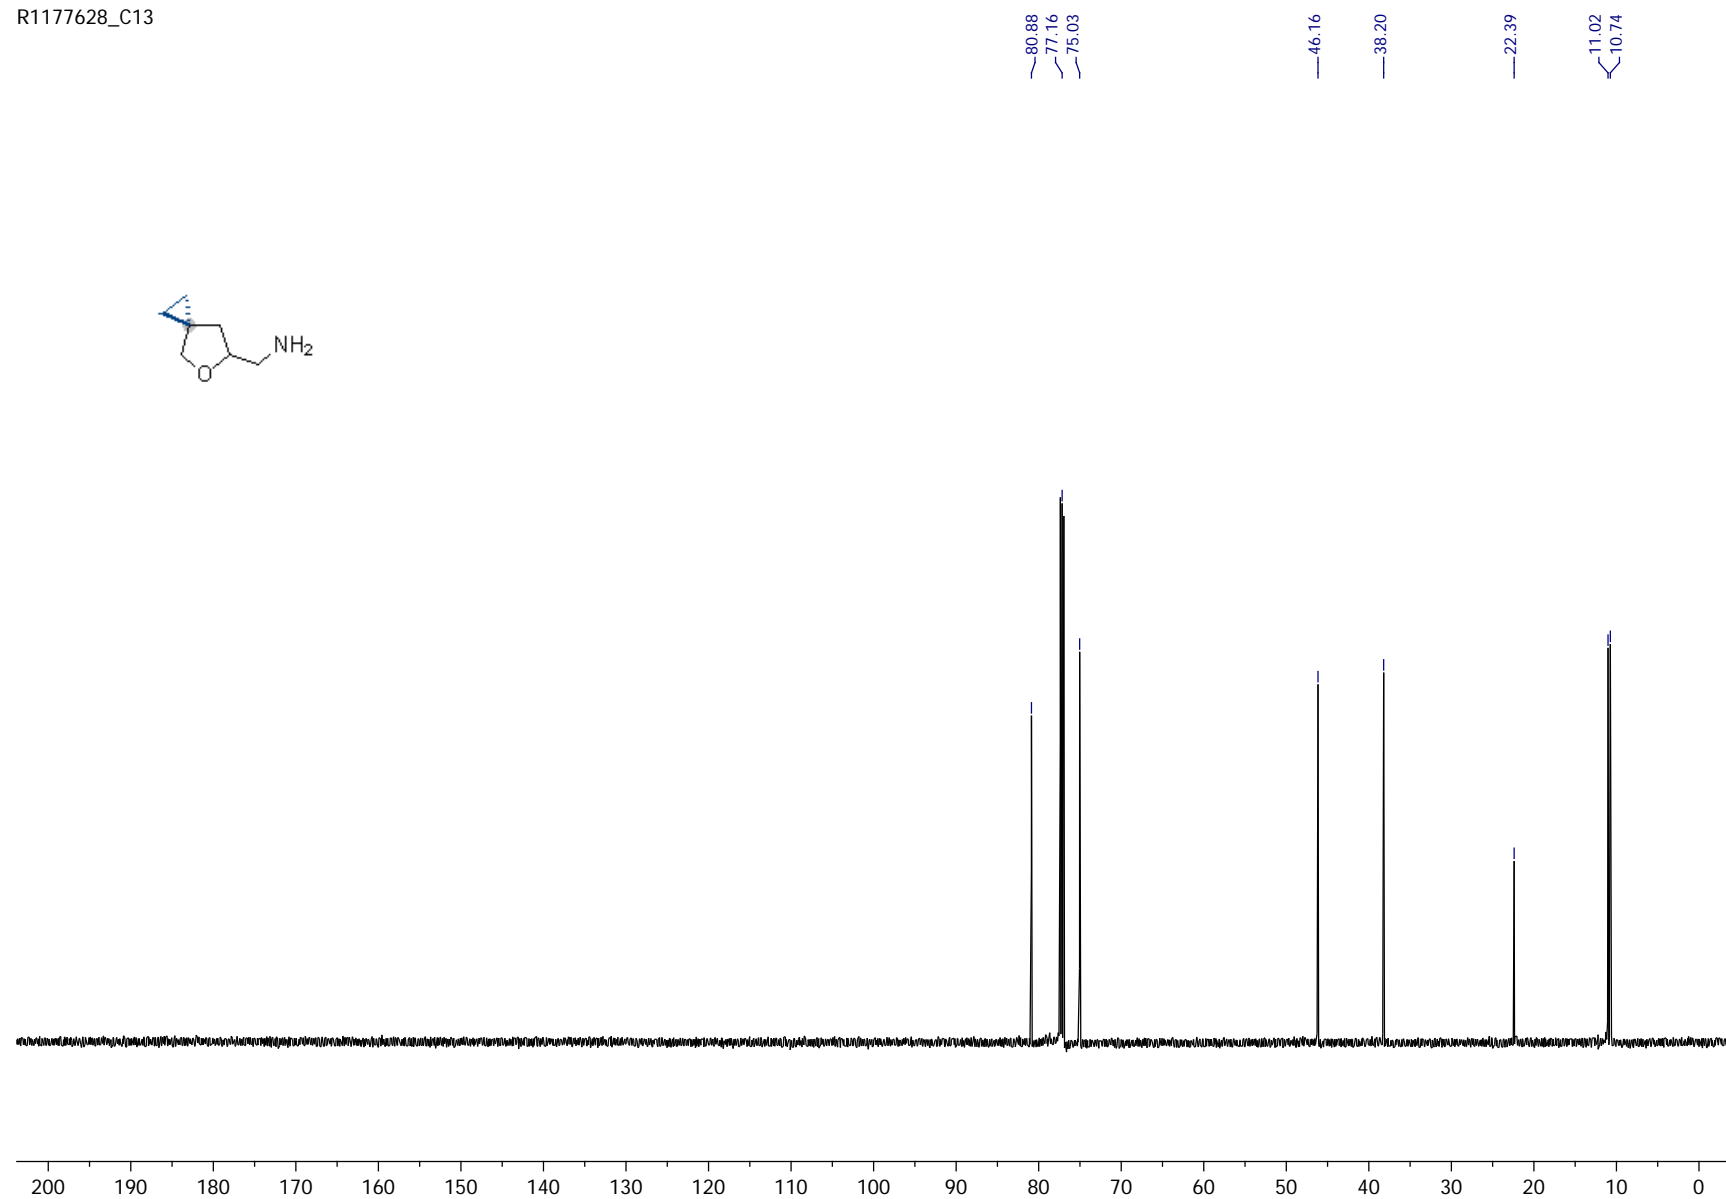

# Compound 6b

R805549

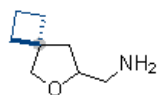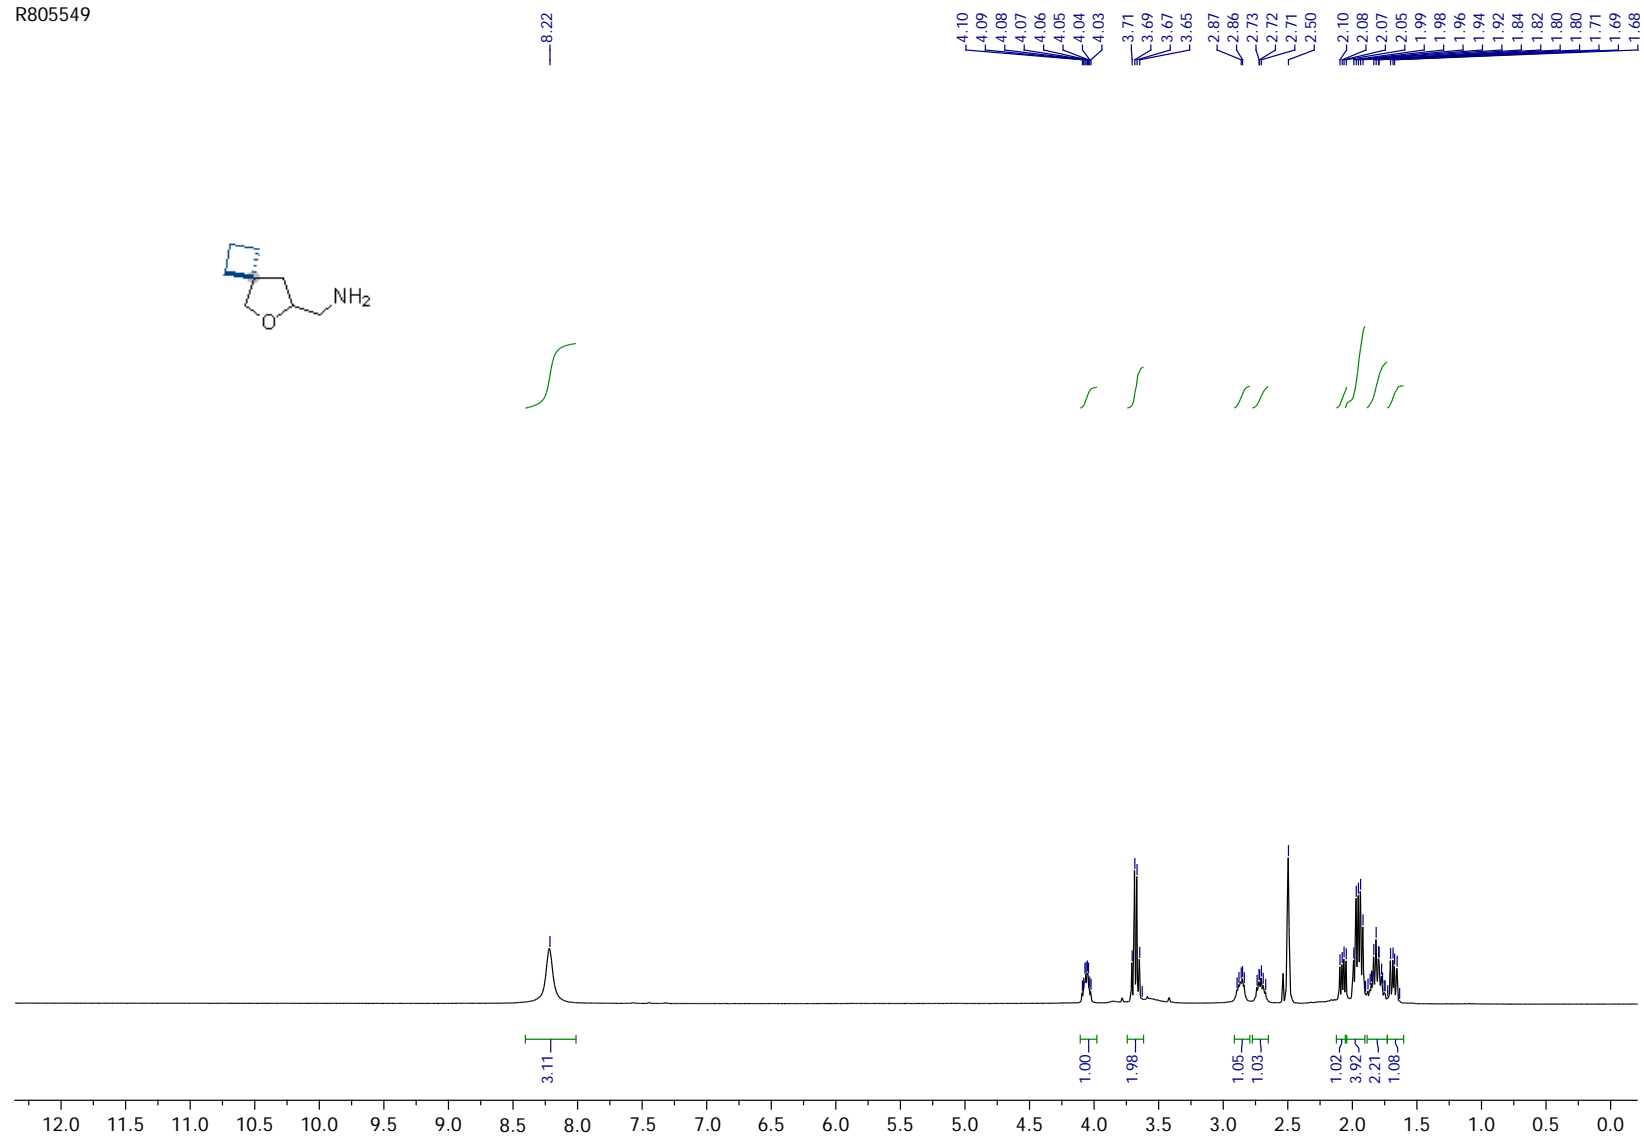

R805549\_C13

|||||

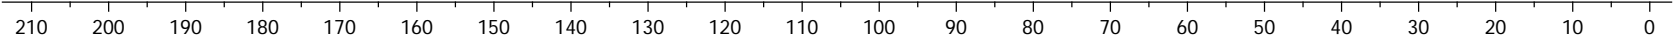

Compound 7b

R1500610

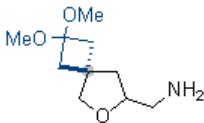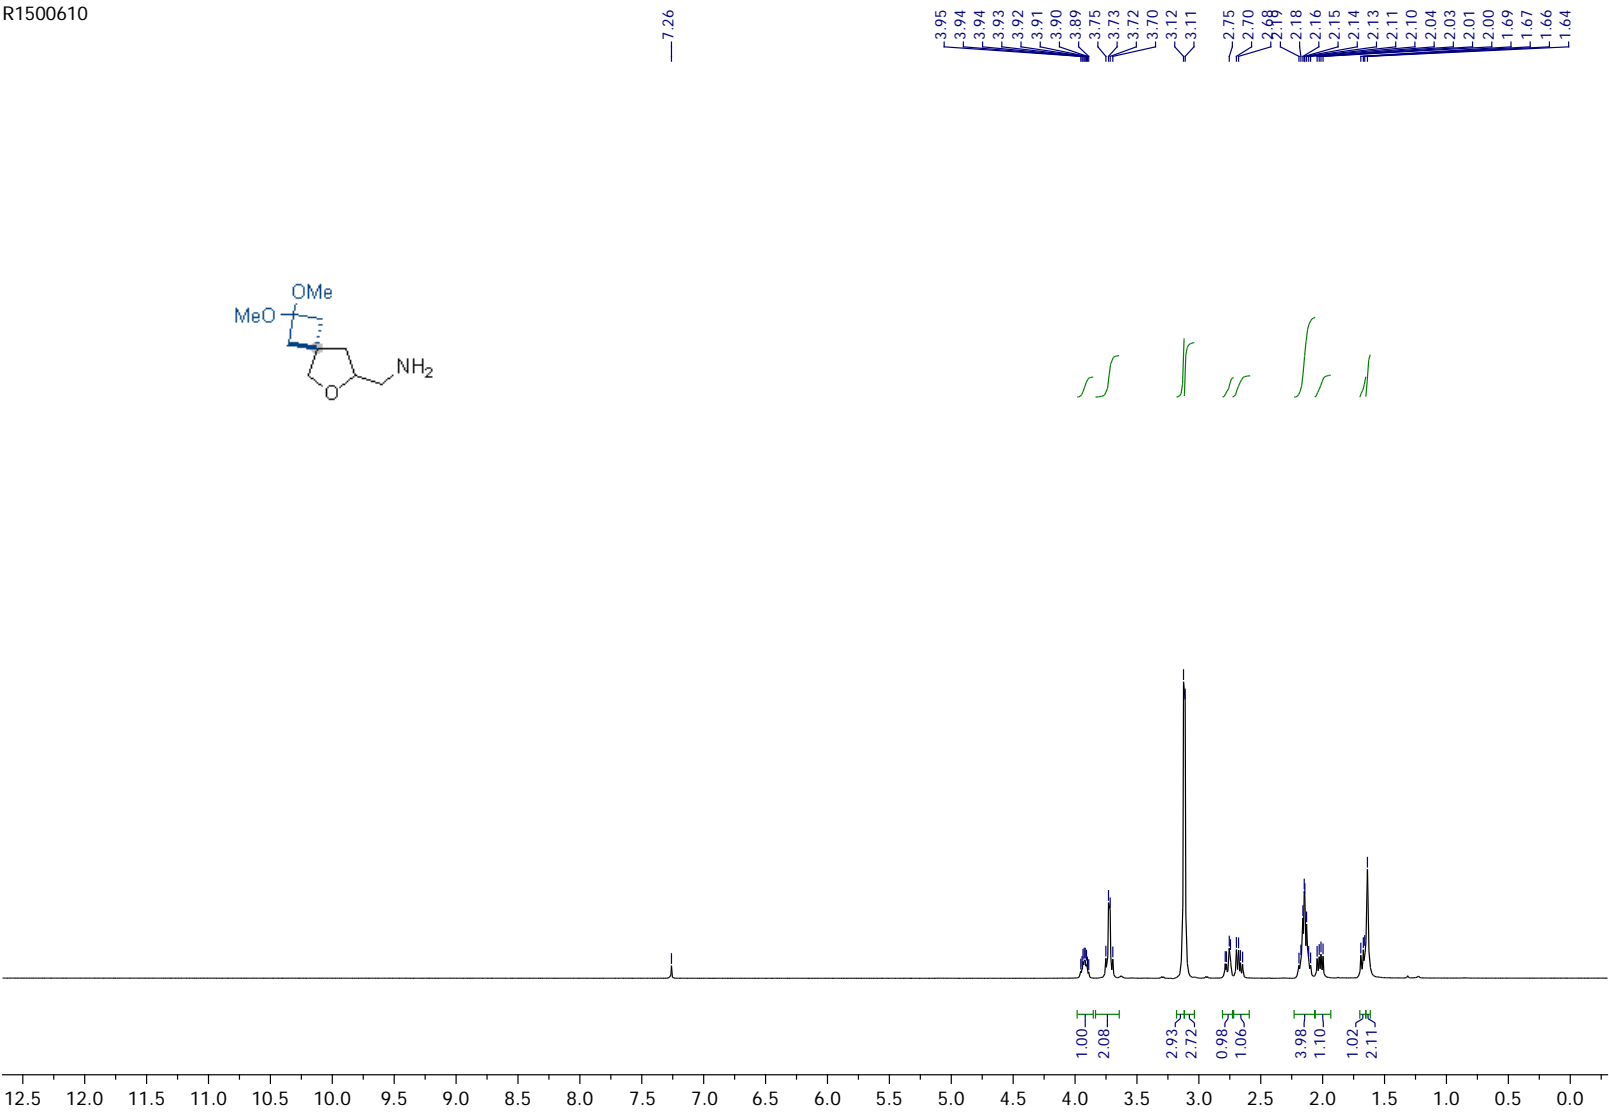

R1500610\_C13

XXXXXXXXXXXXXXXXXXXX

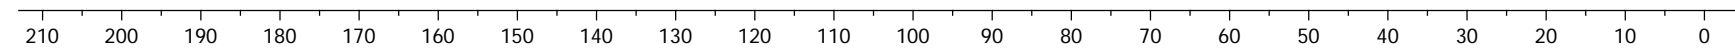

Compound 8b

R763978

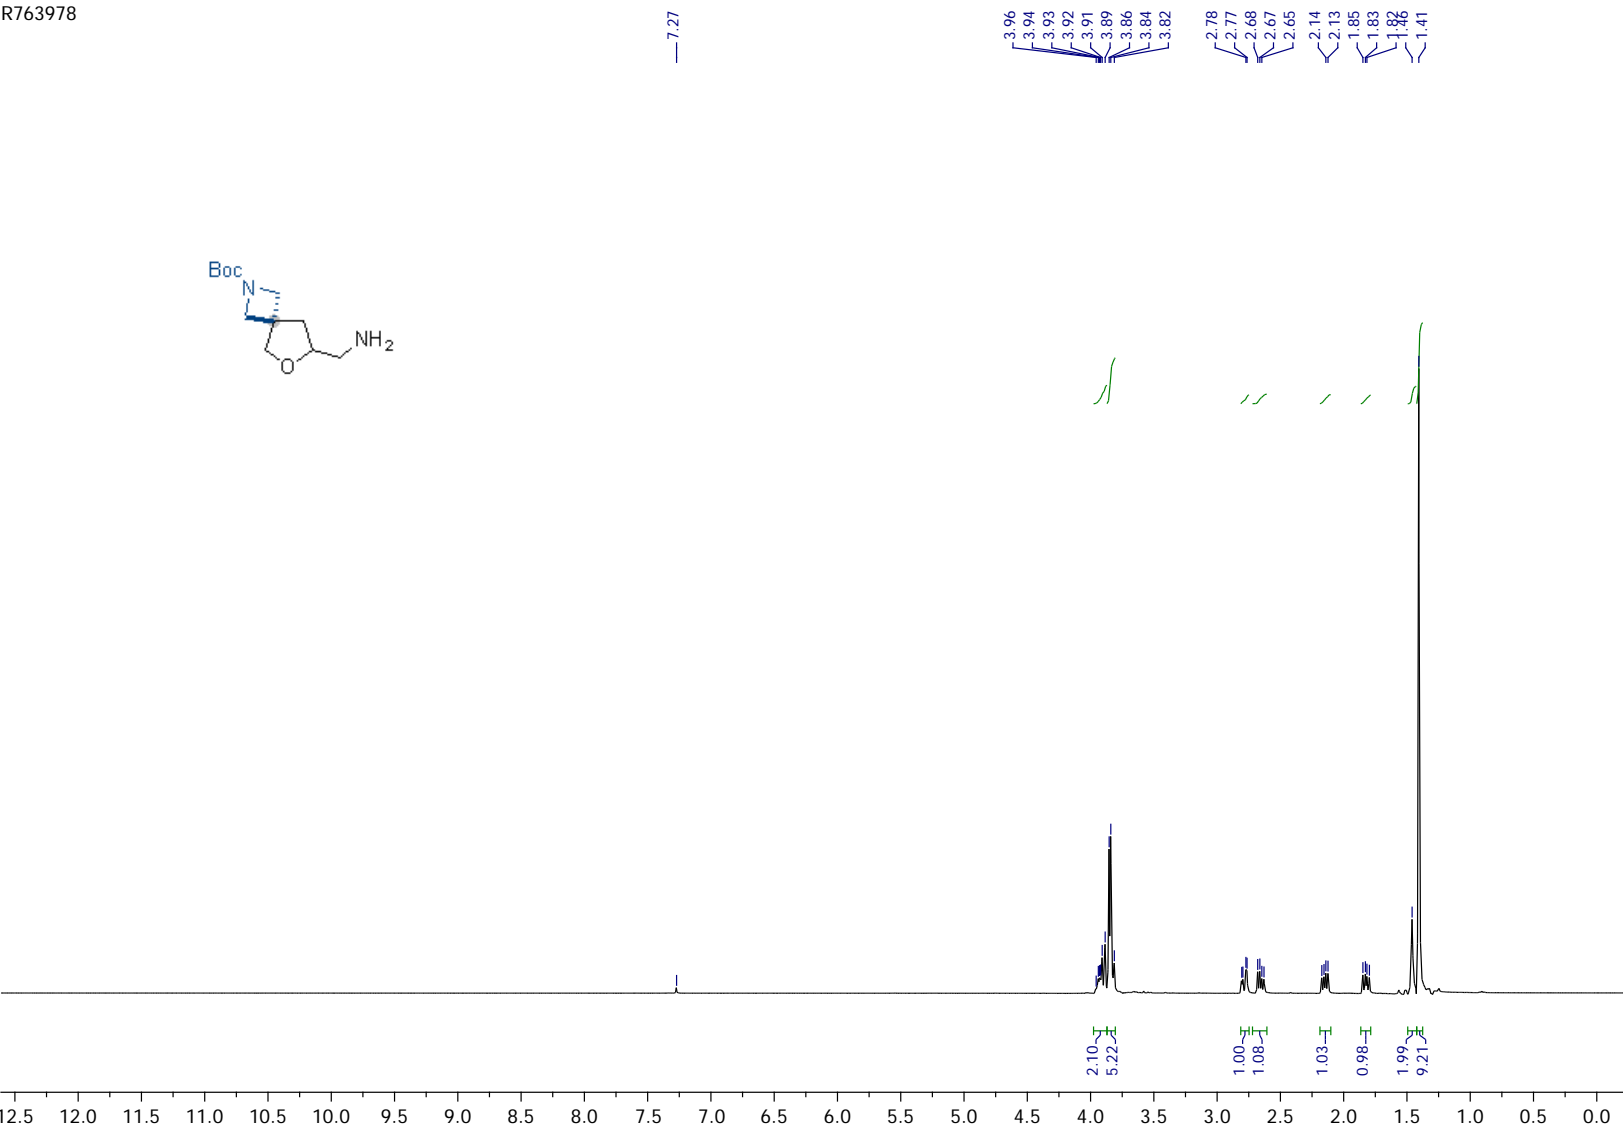



R763978\_C13

—156.26

80.64  
79.67  
77.16  
77.05

—59.17

—46.20

40.74  
40.60

—28.43

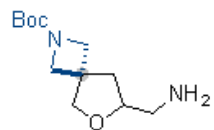

# Compound 9b

R1720956

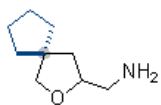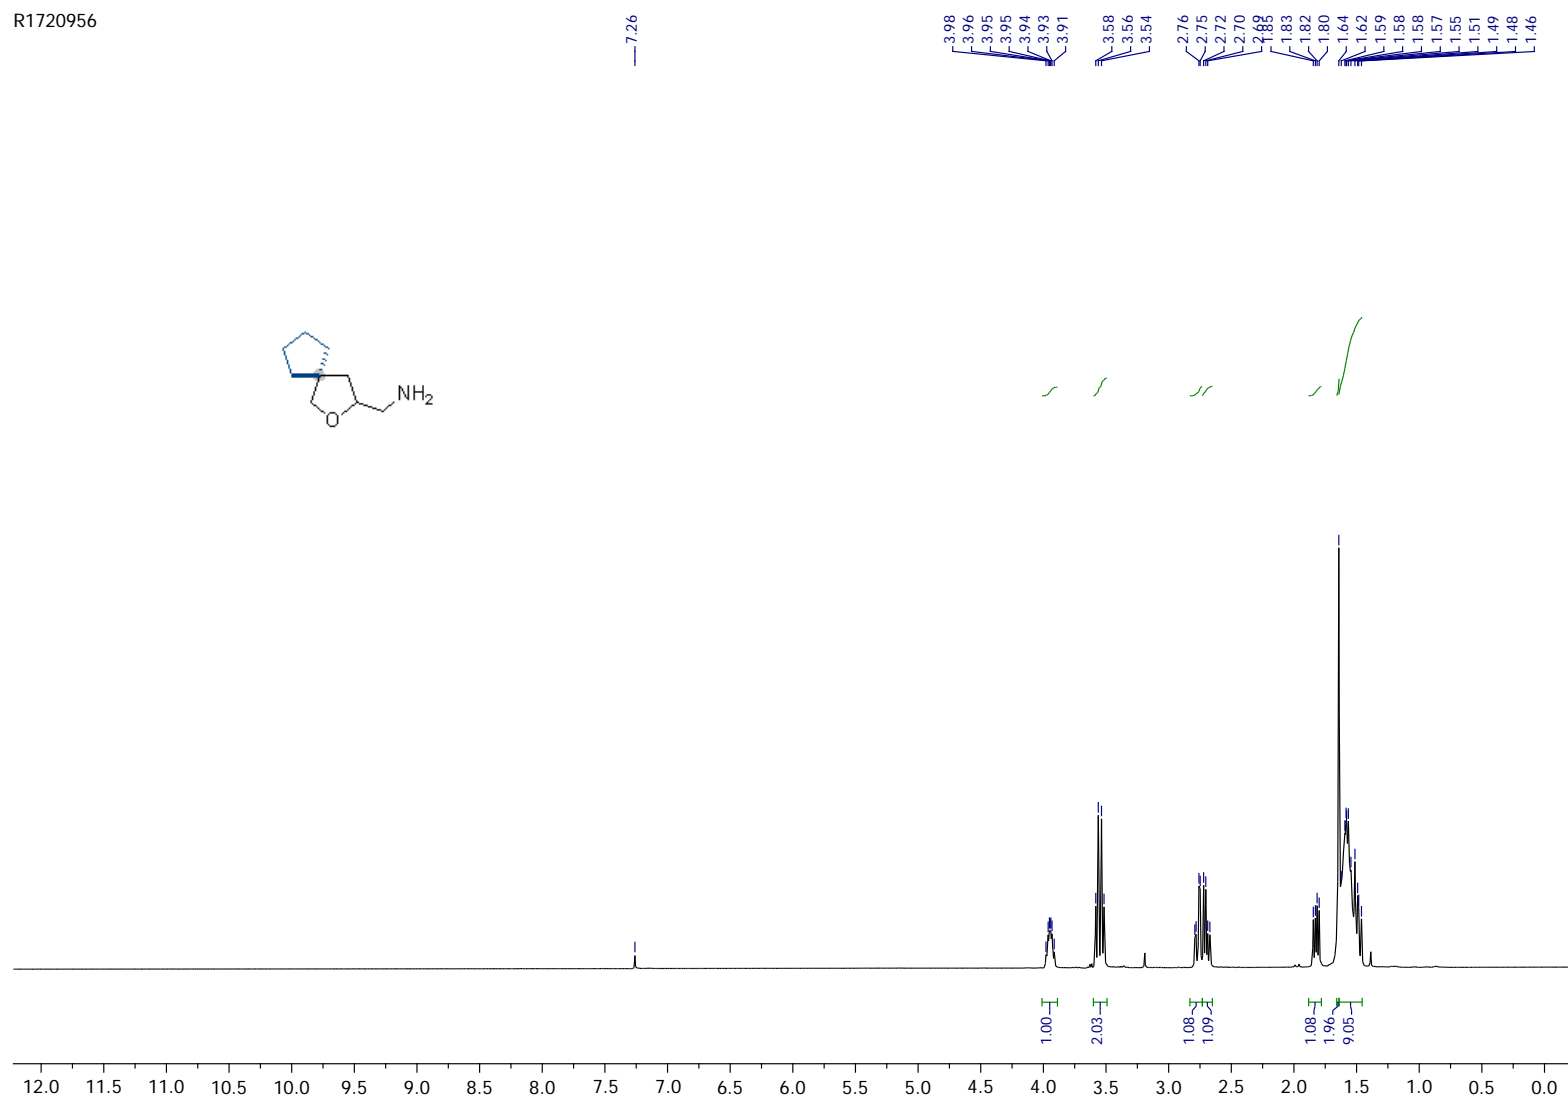

R1720956\_C13

.....

210 200 190 180 170 160 150 140 130 120 110 100 90 80 70 60 50 40 30 20 10 0

Compound 10b

R1110081

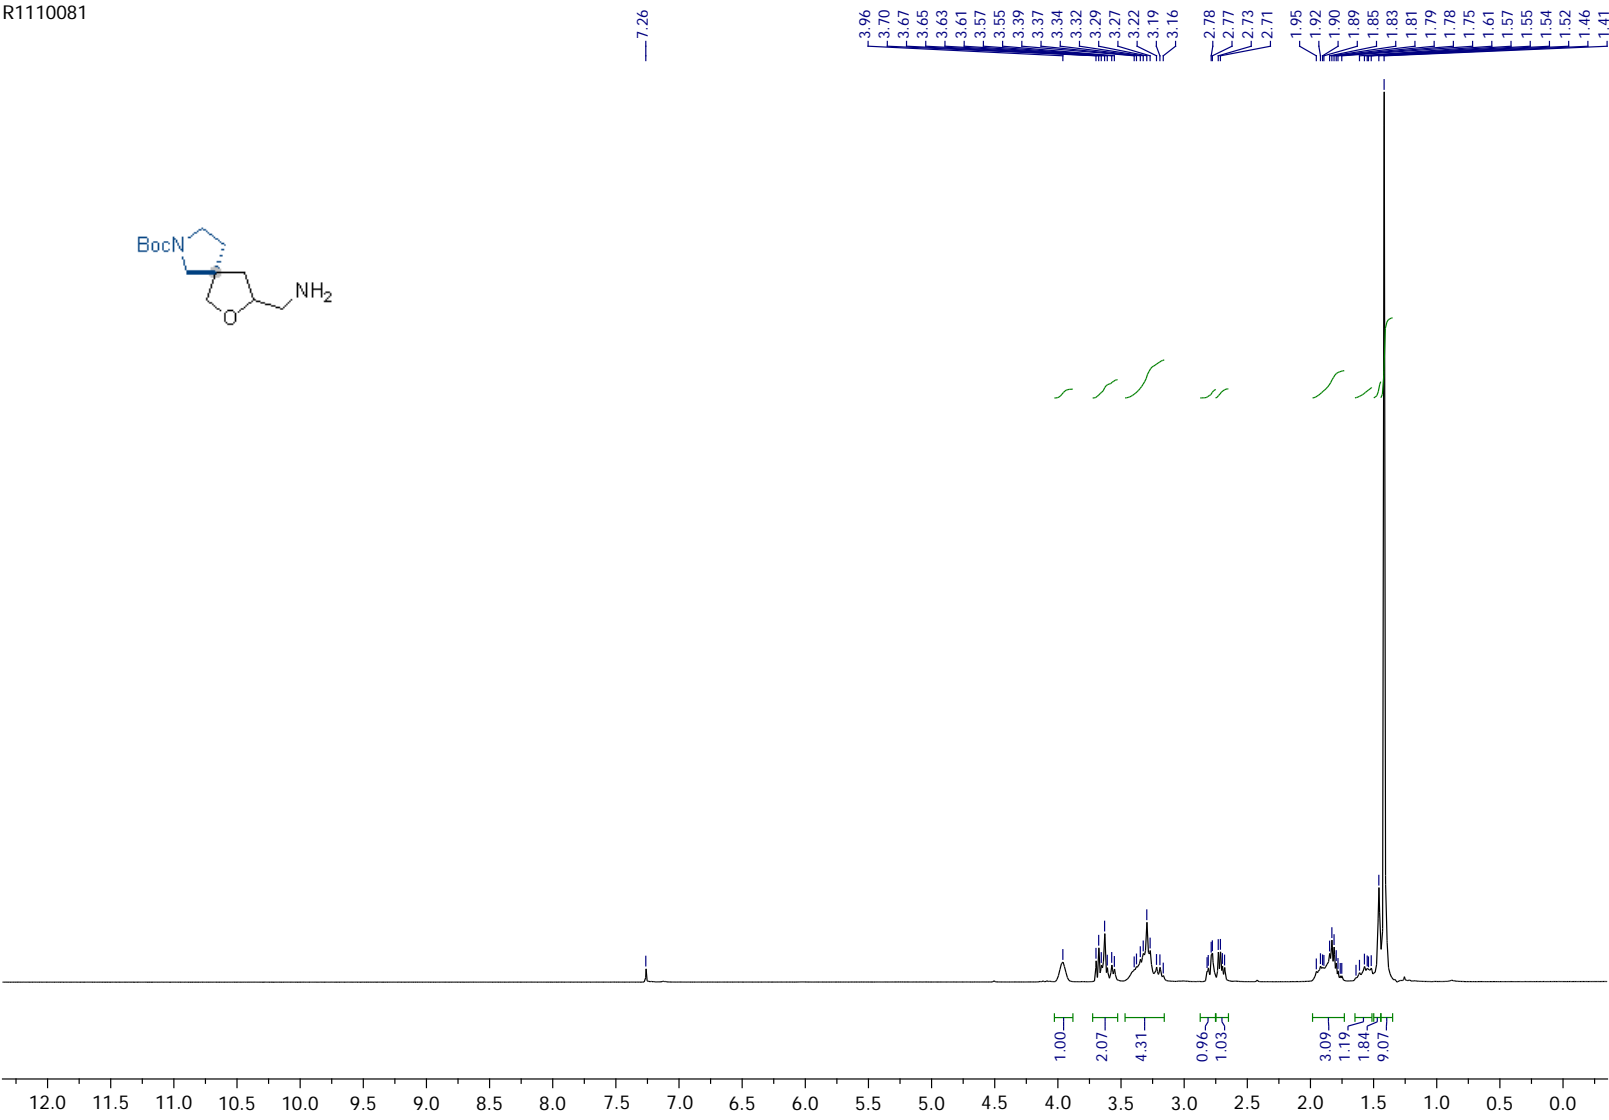

R1110081\_C13

1110081\_C13

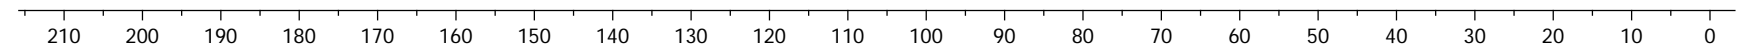

Compound 11b

R1738926

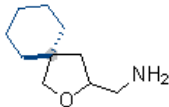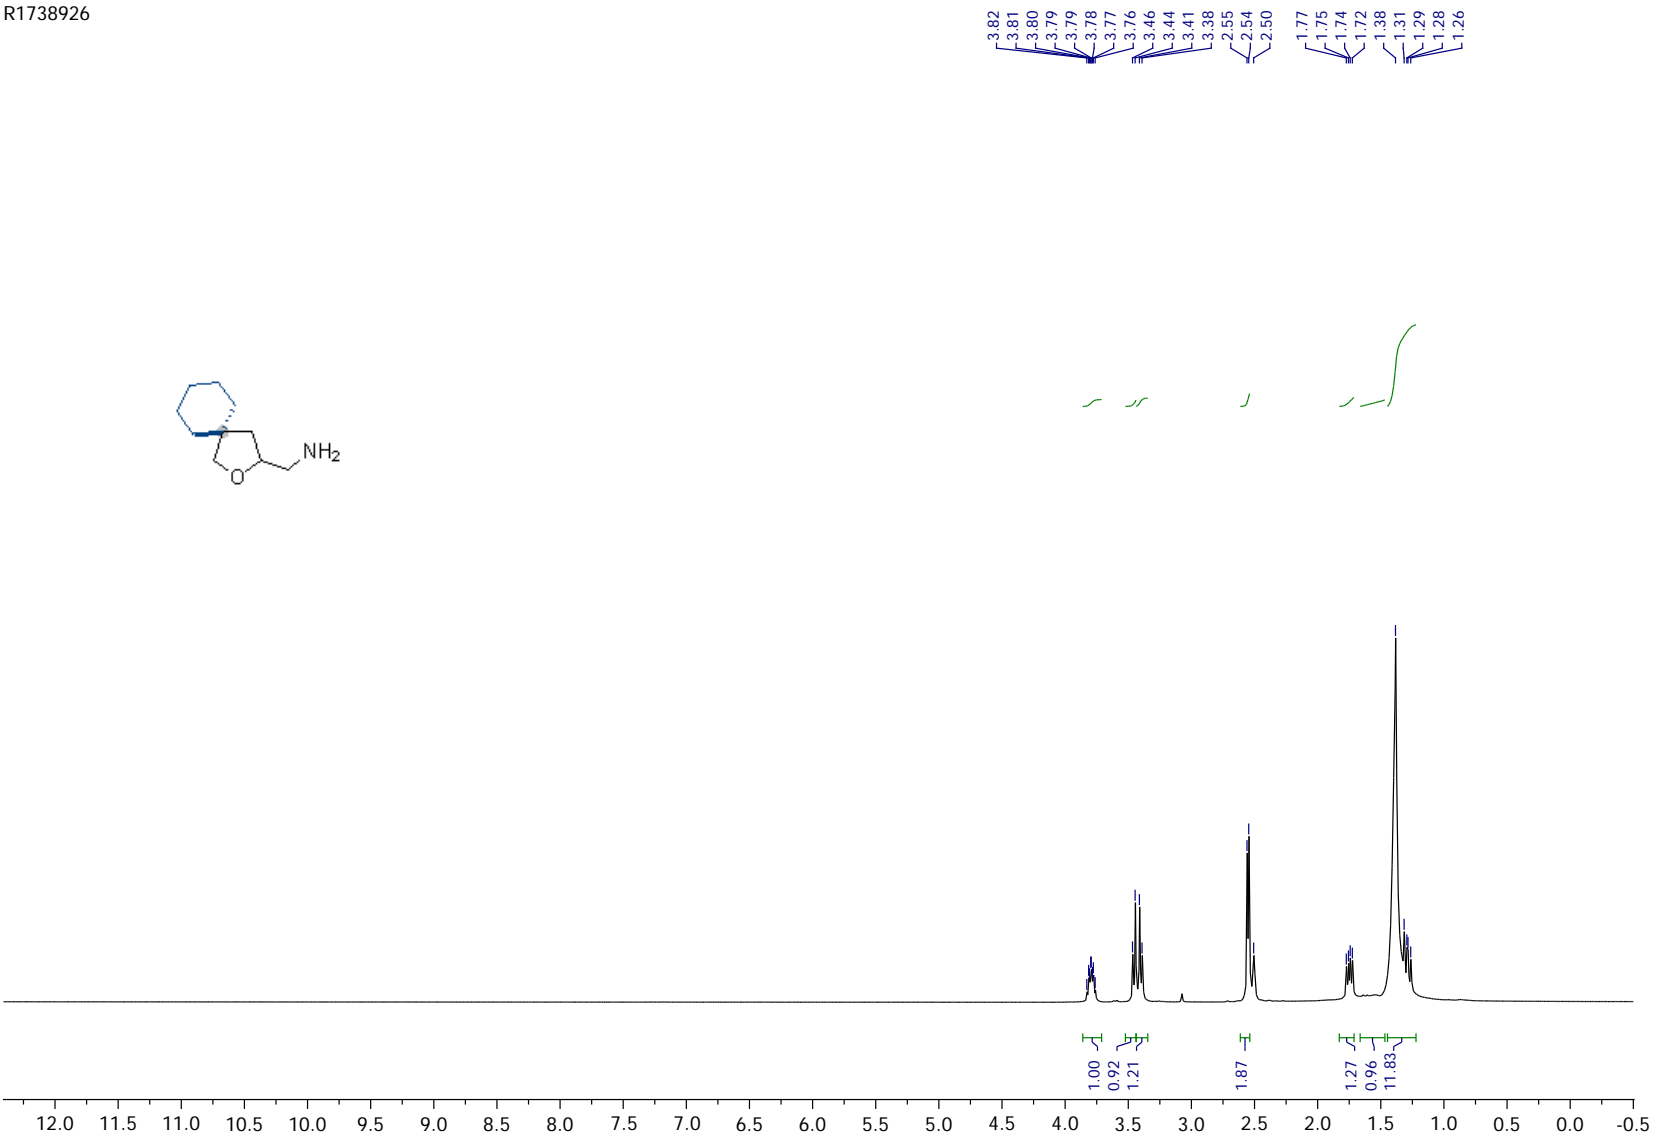

R1738926\_C13

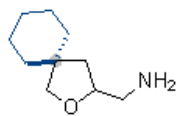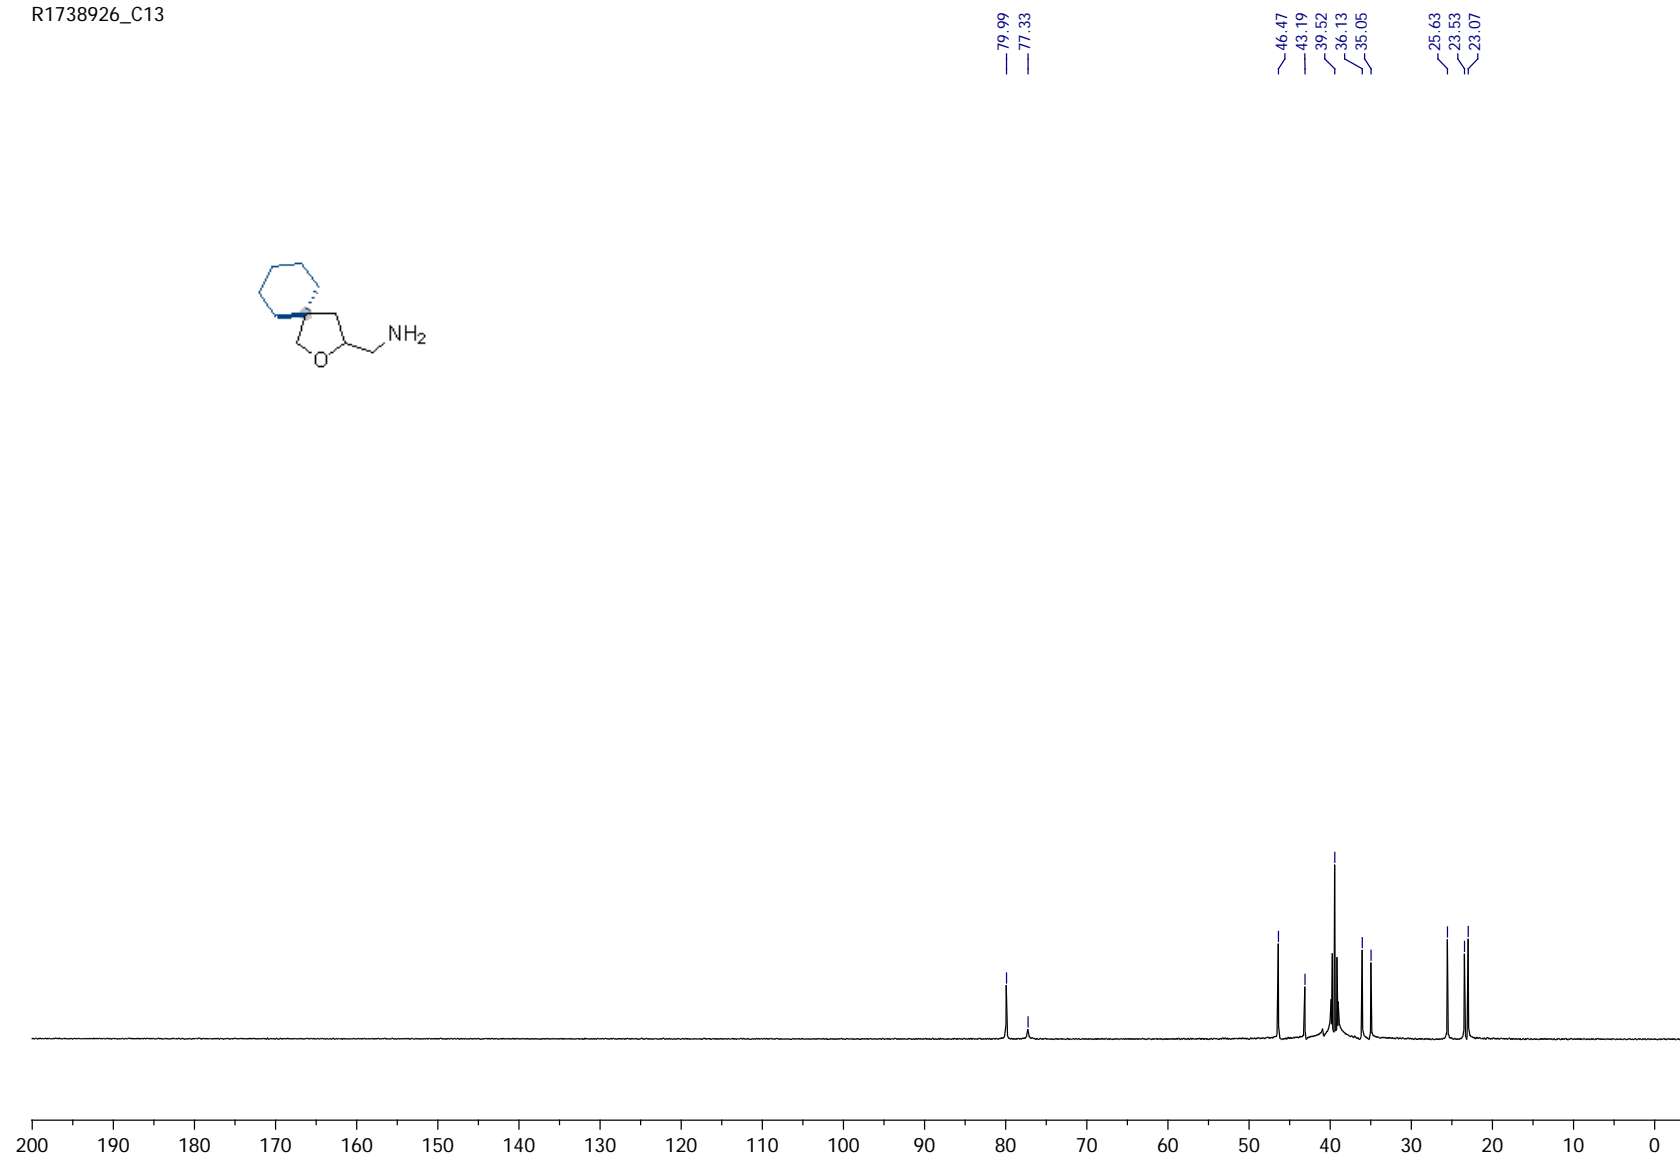

# Compound 12b

R1722499

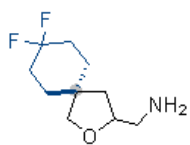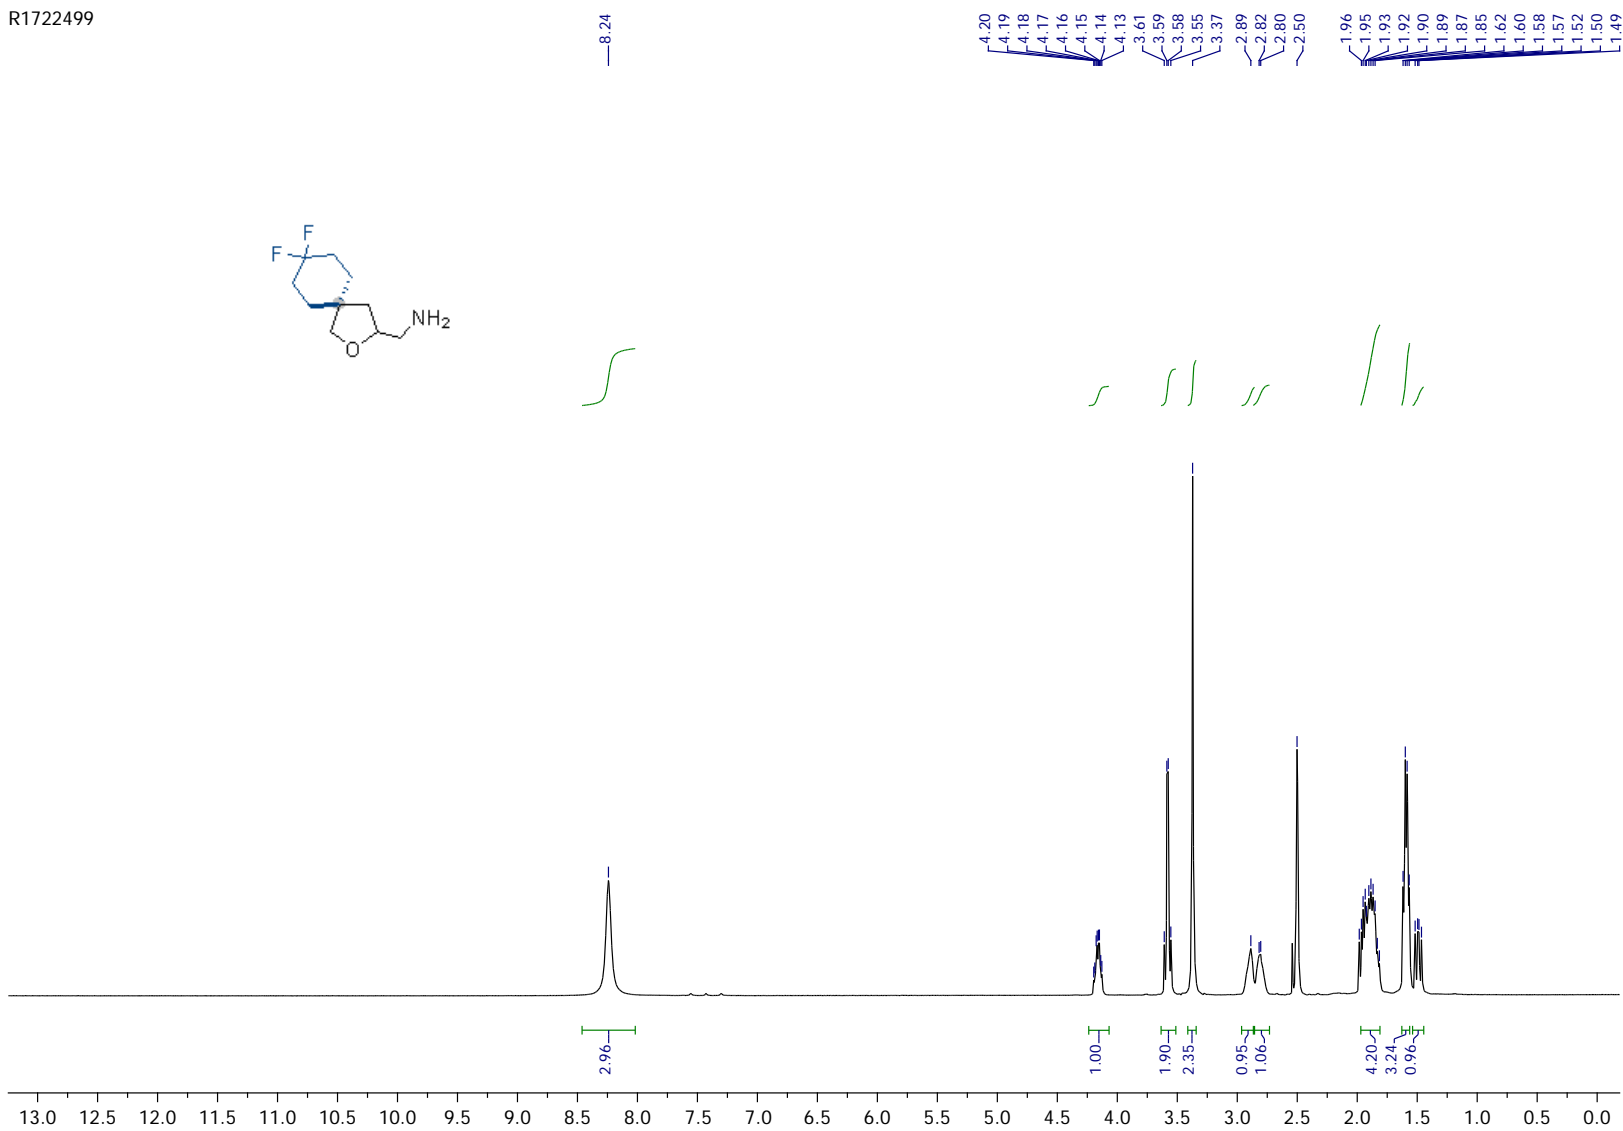



R1722499\_C13

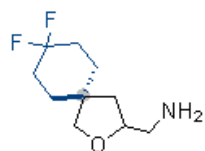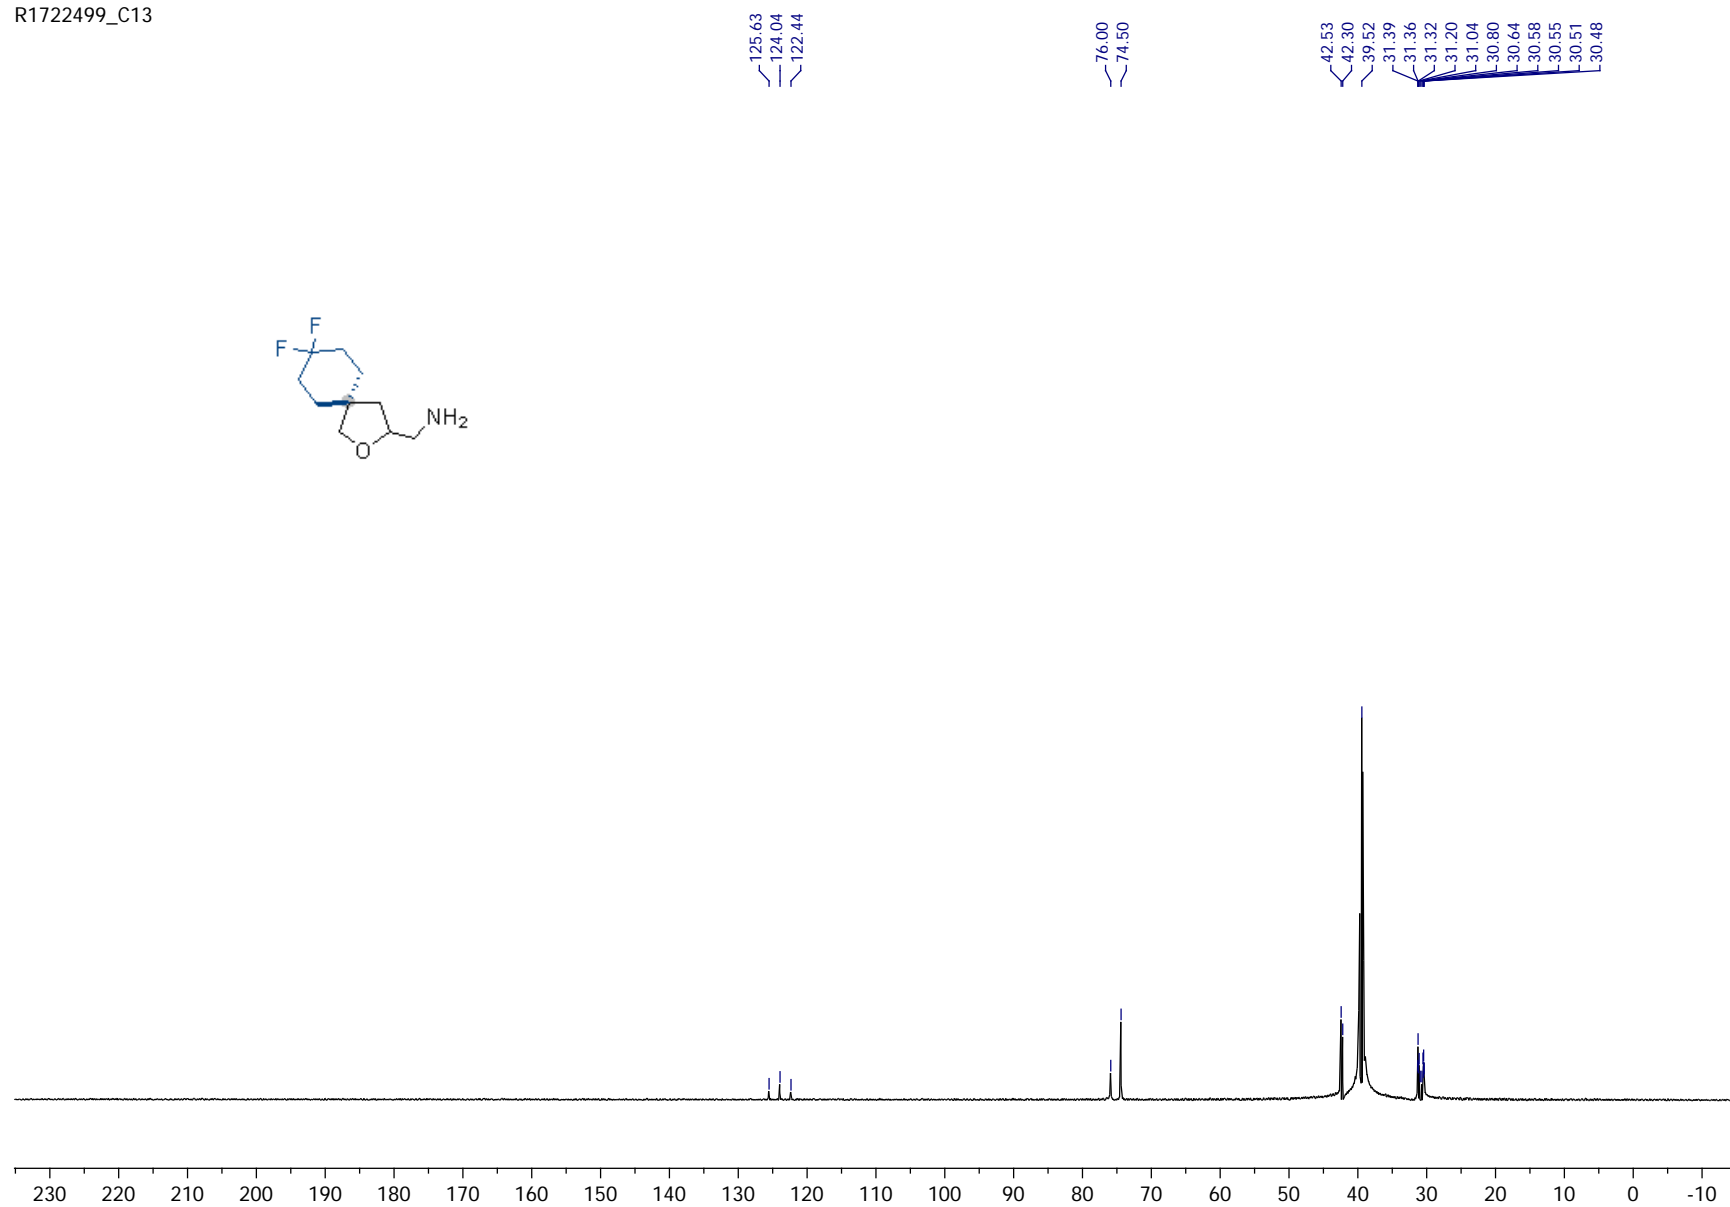

# Compound 13b

R777425

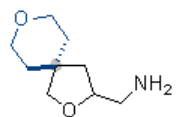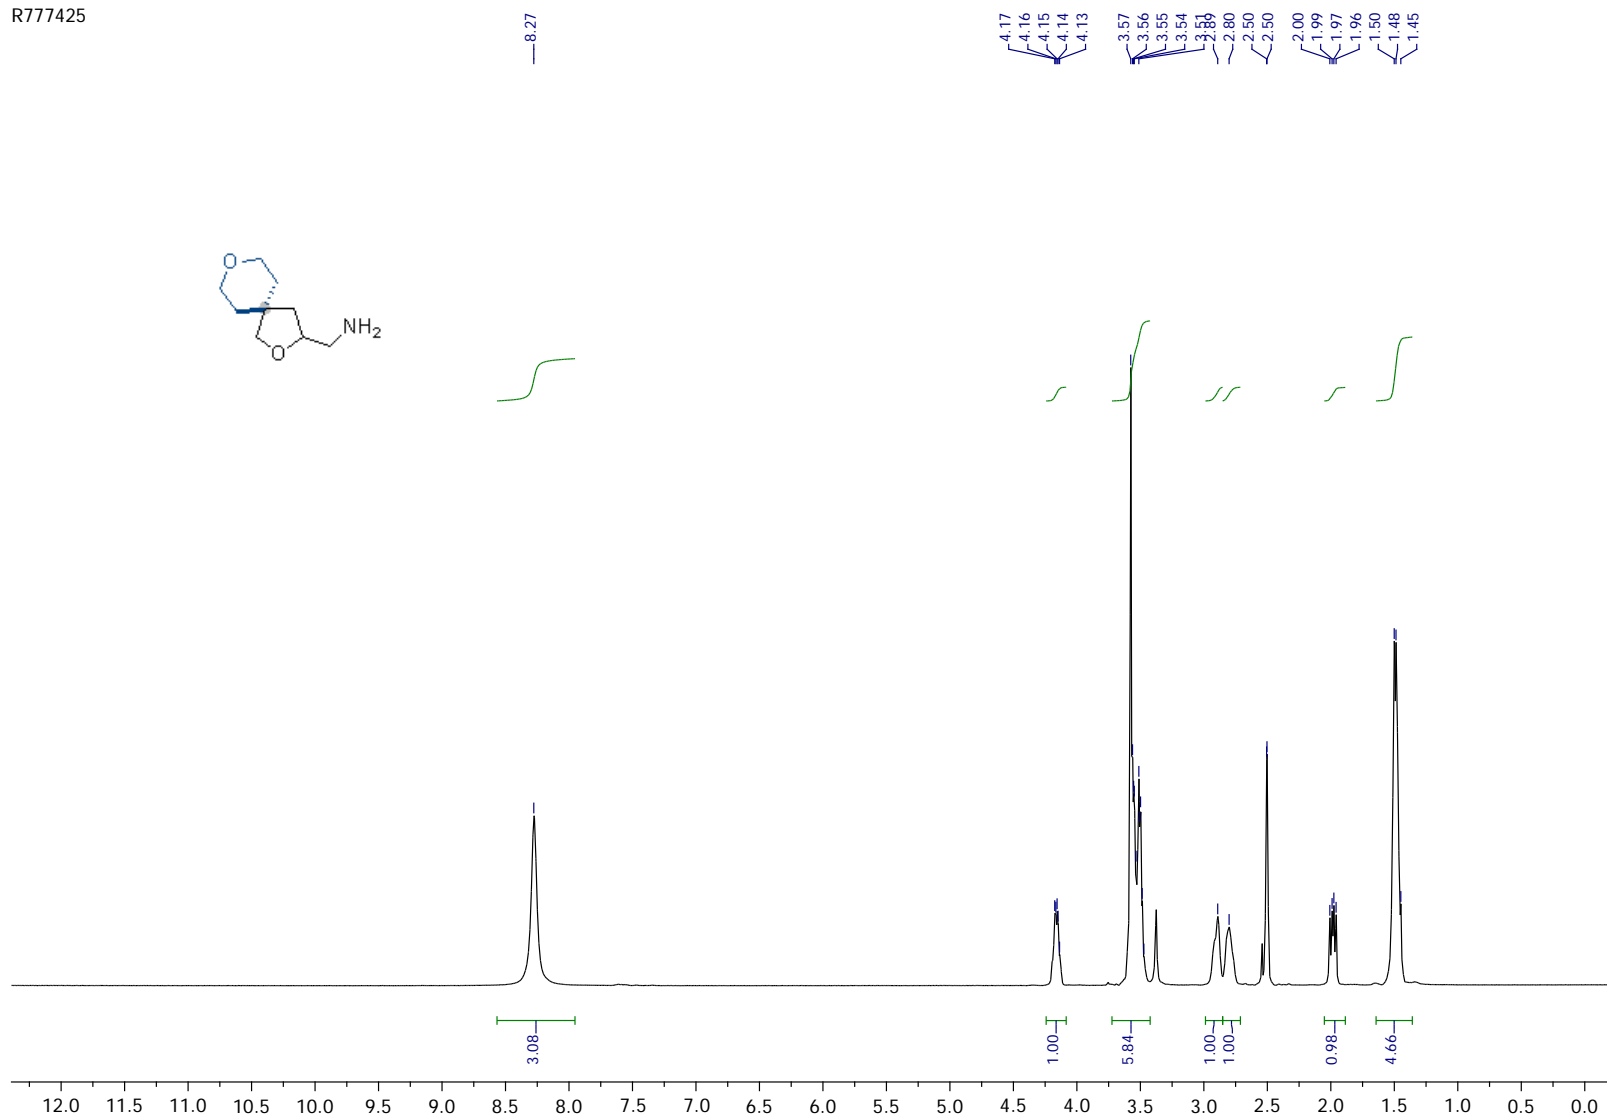



Compound 14b

R840260

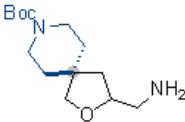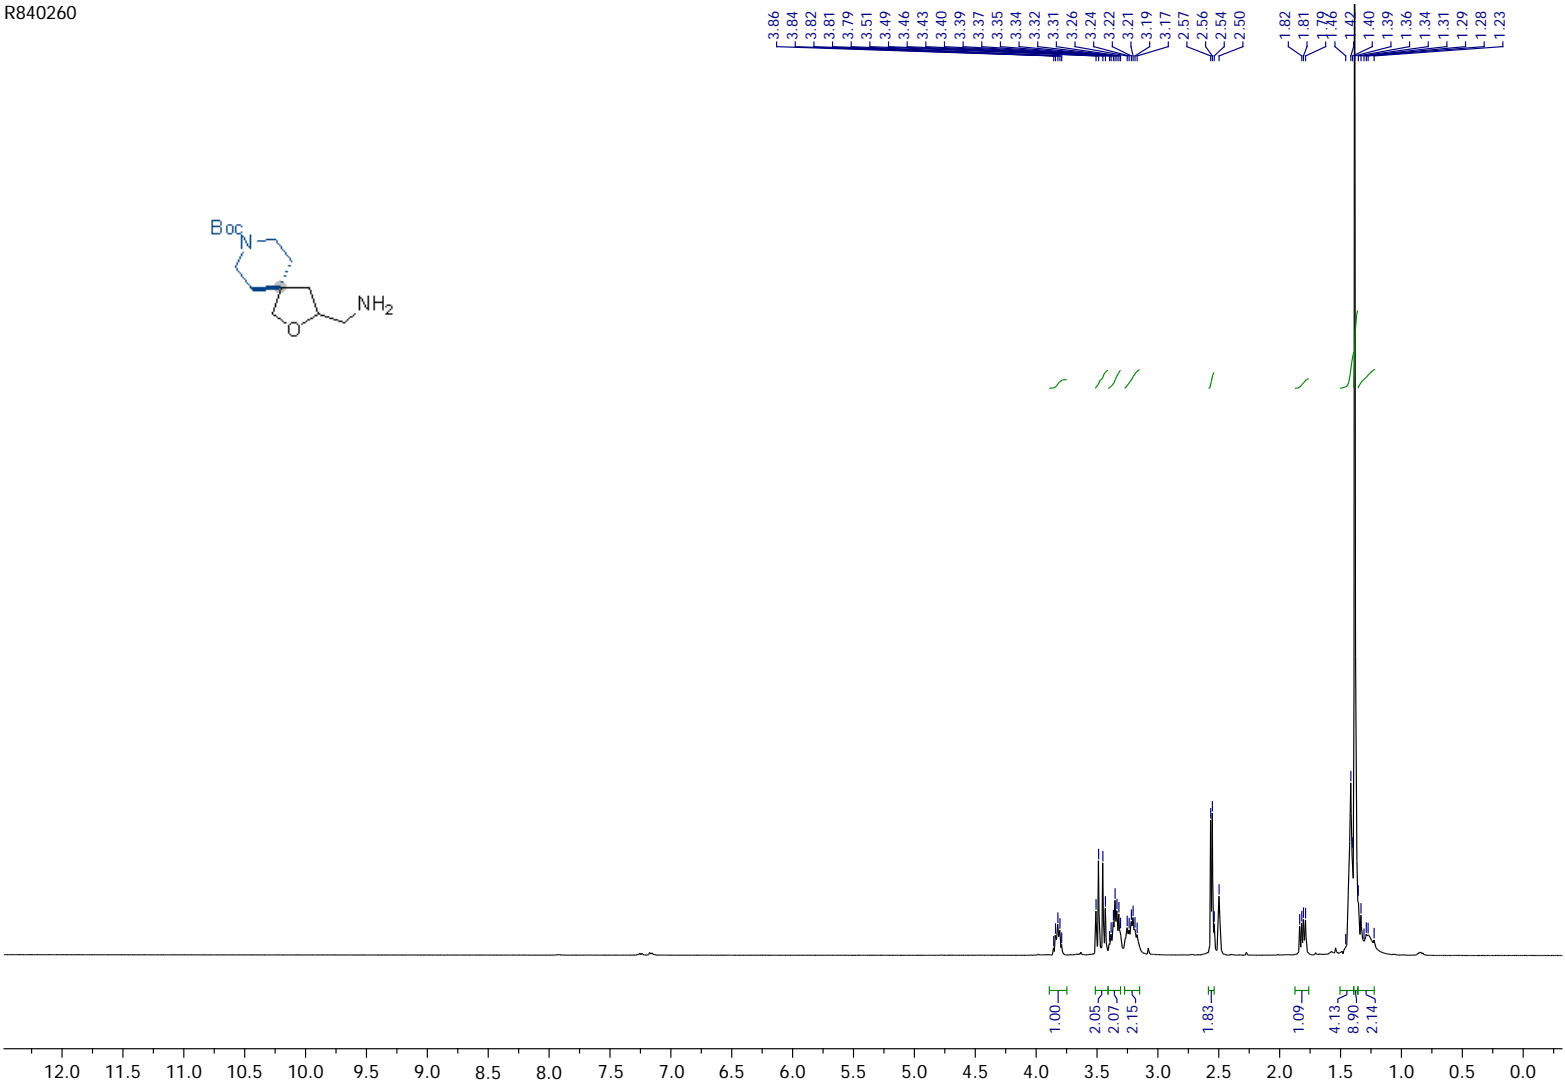



Compound 15b

<sup>1</sup>H\_CD3OD

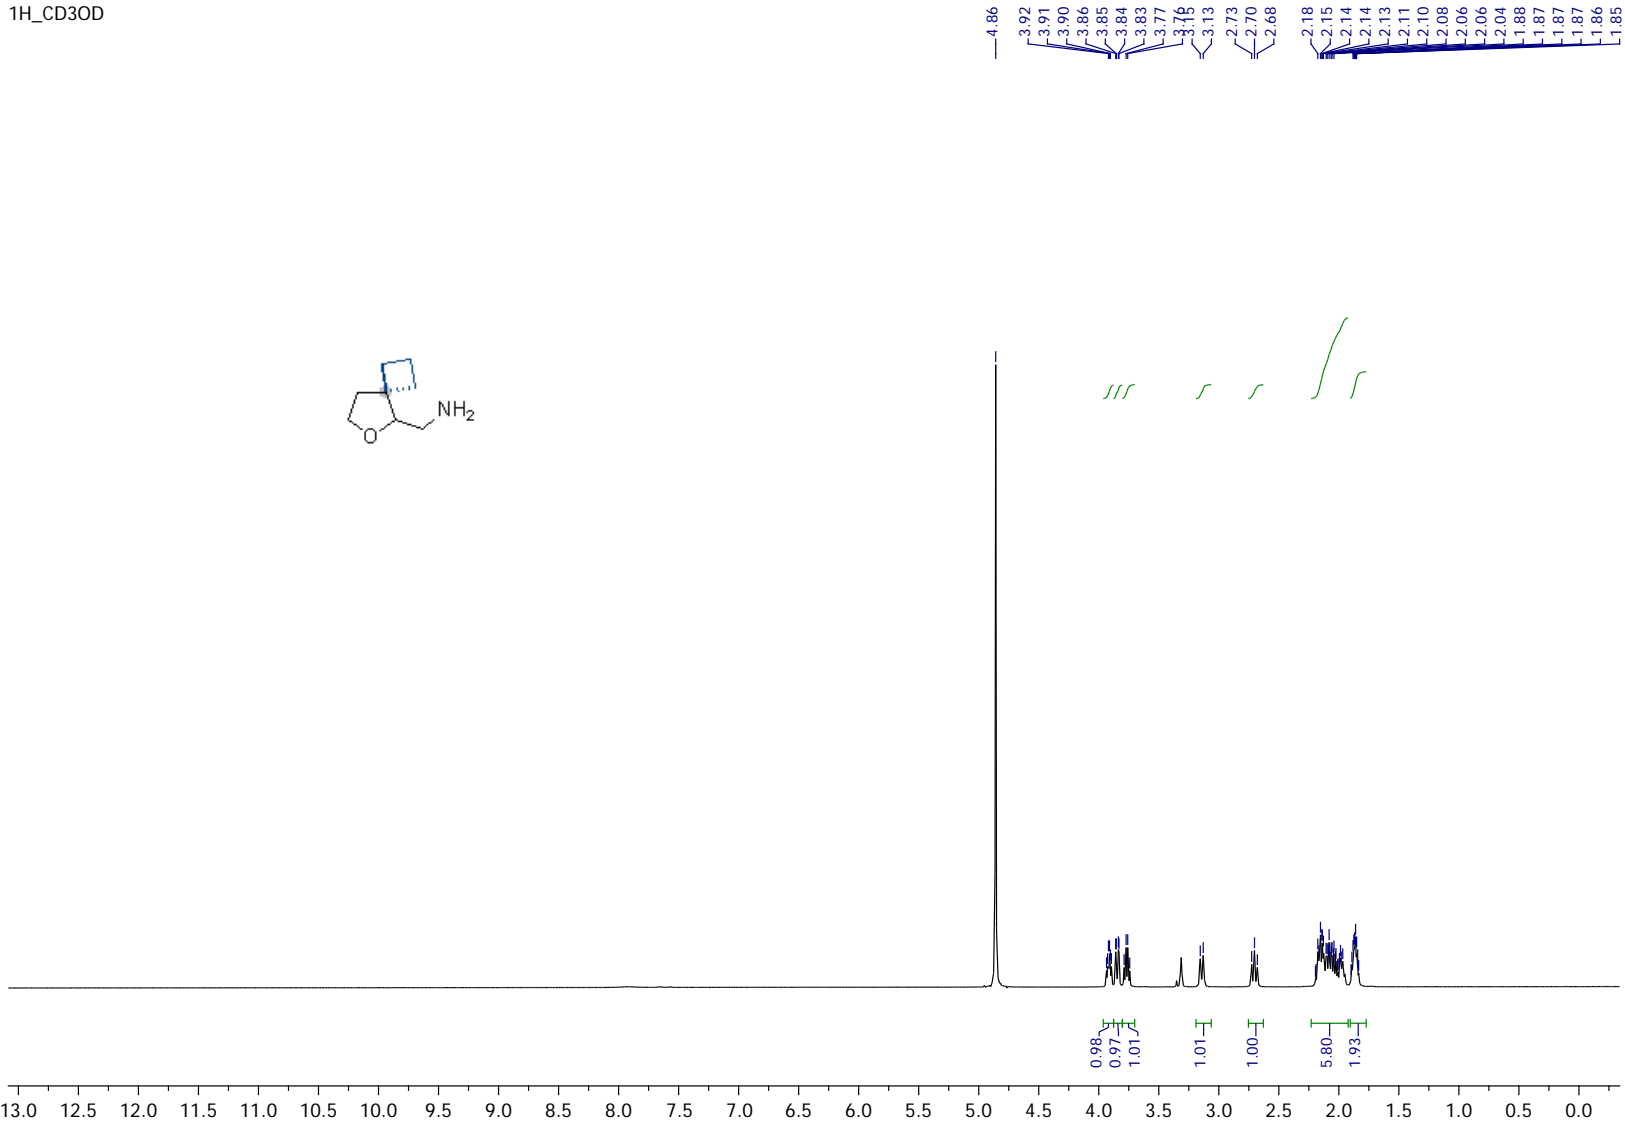

C13

195

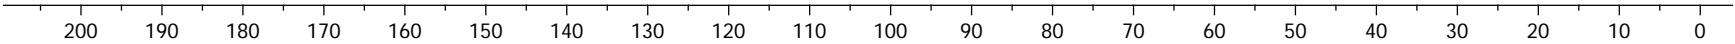

# Compound 16b

<sup>1</sup>H<sub>2</sub>CDCl<sub>3</sub>

\_\_\_\_\_

12.5 12.0 11.5 11.0 10.5 10.0 9.5 9.0 8.5 8.0 7.5 7.0 6.5 6.0 5.5 5.0 4.5 4.0 3.5 3.0 2.5 2.0 1.5 1.0 0.5 0.0 -0.5



C13

—

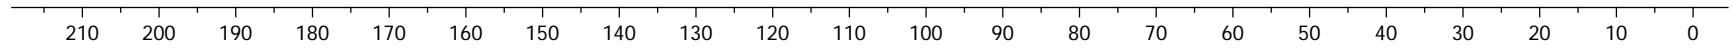

Compound 17b

1H\_CD3OD

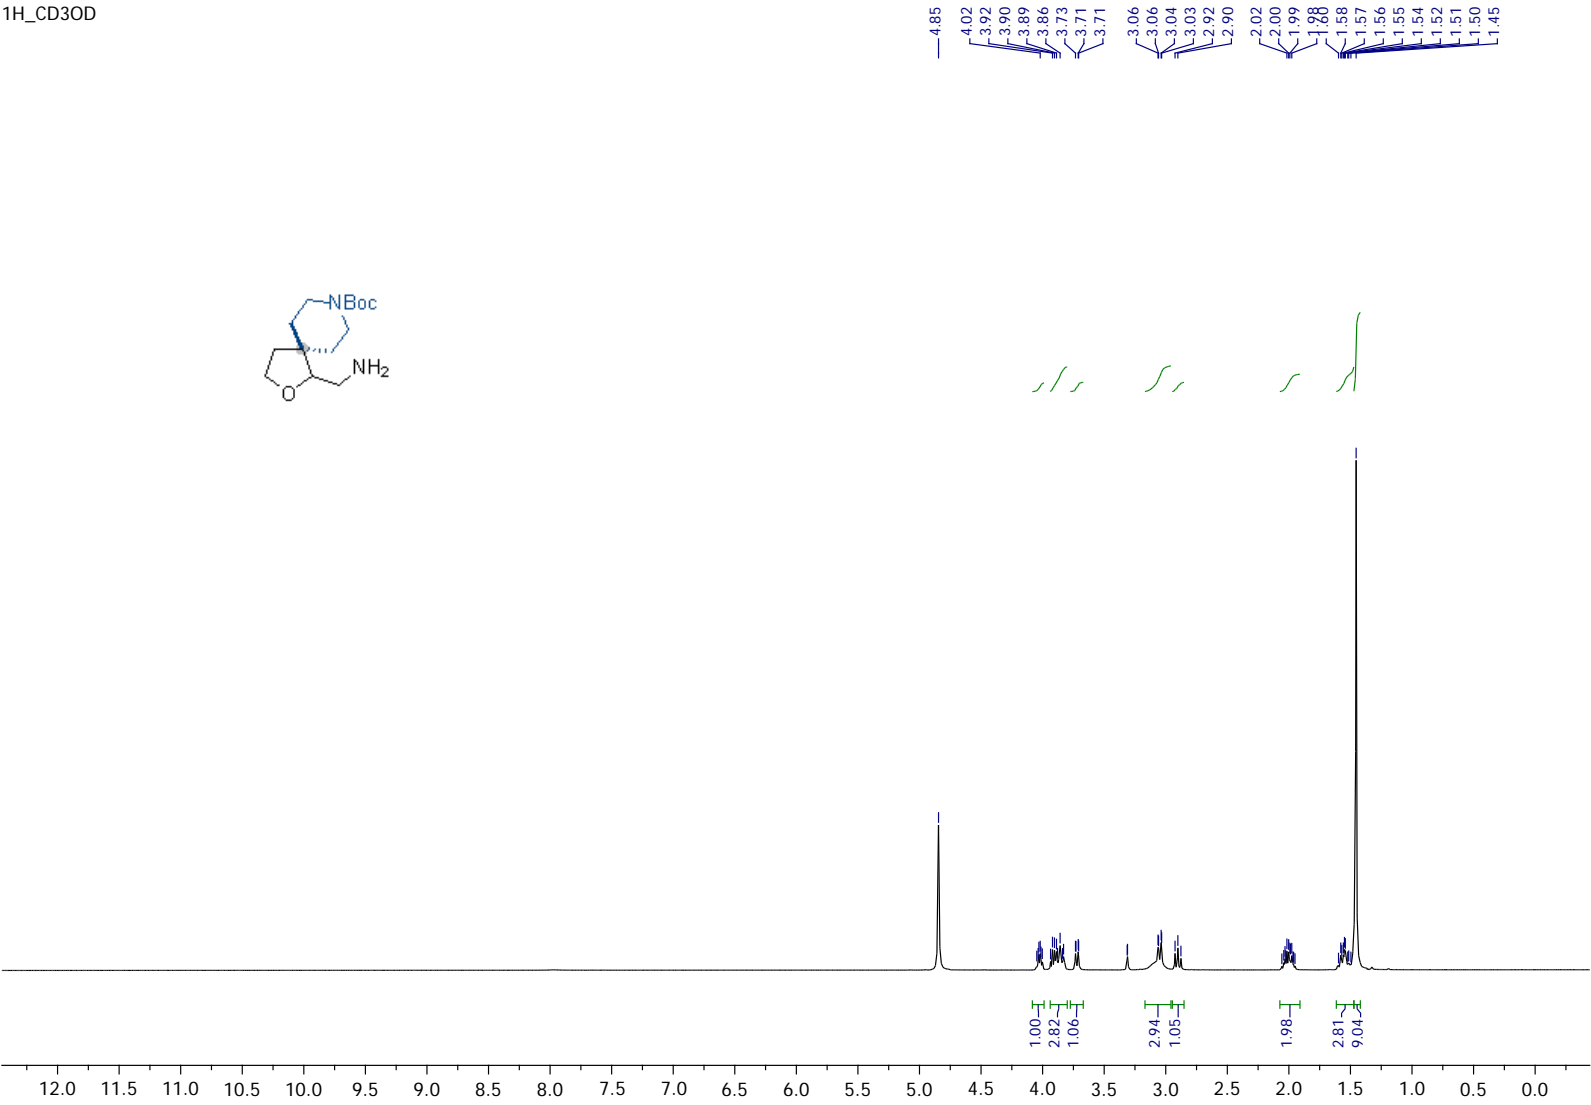

C13

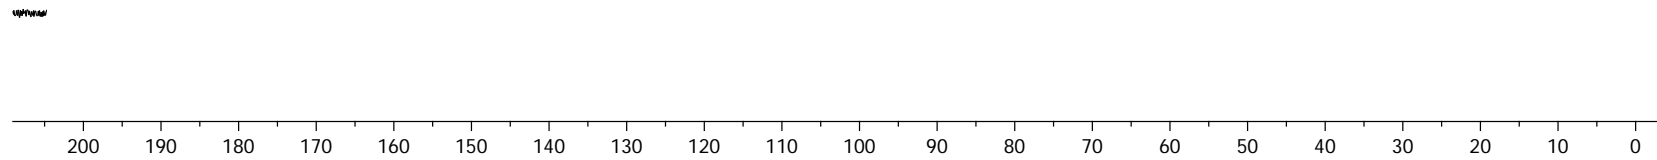

# Compound 18b

R819161

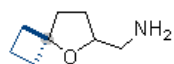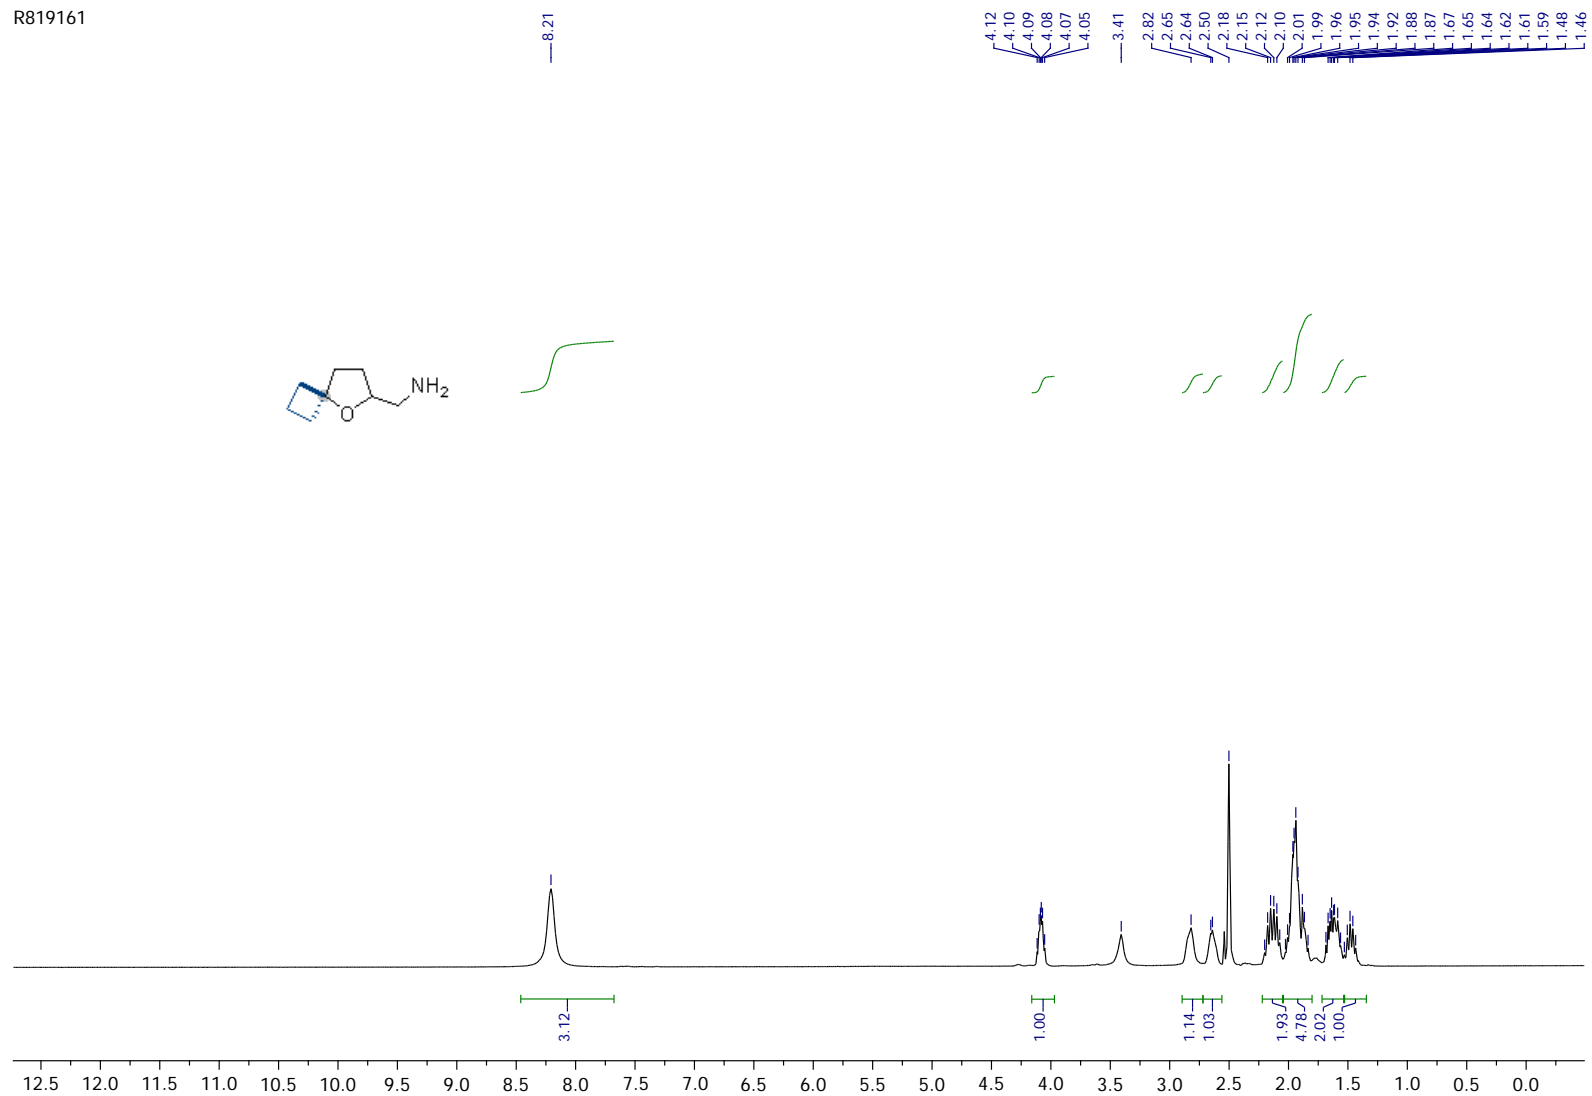



# Compound 19b

R878238

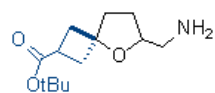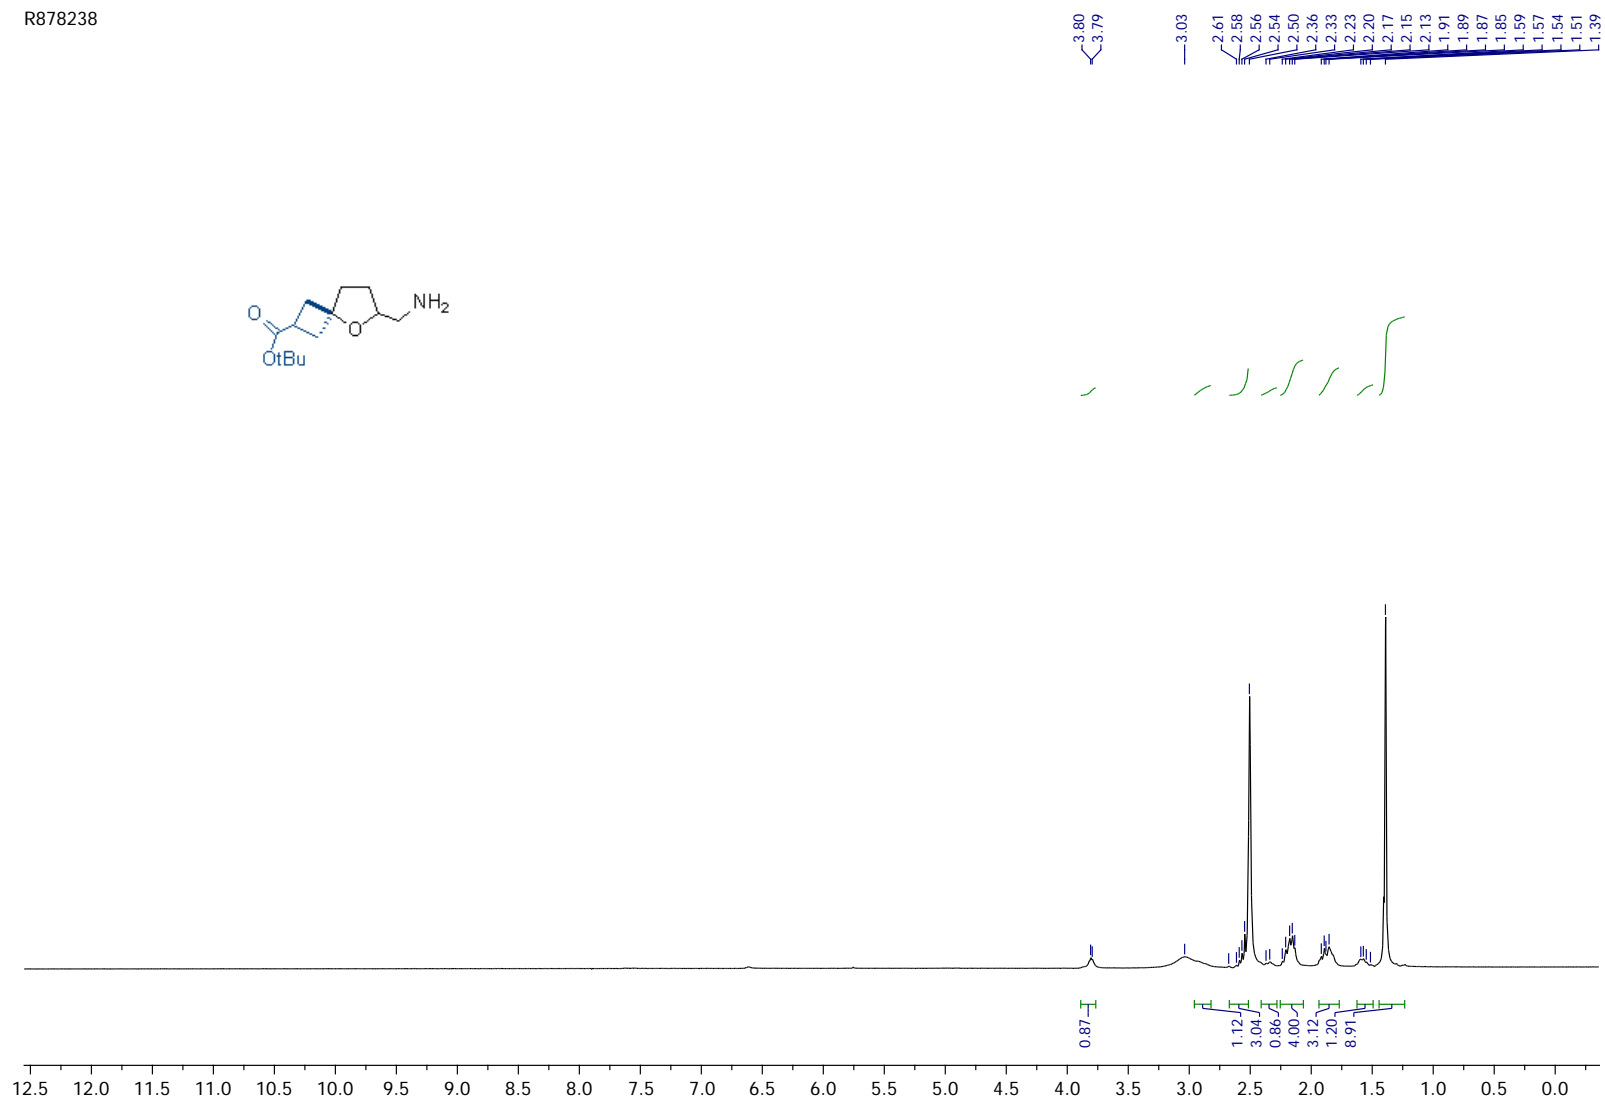

R878238\_13C

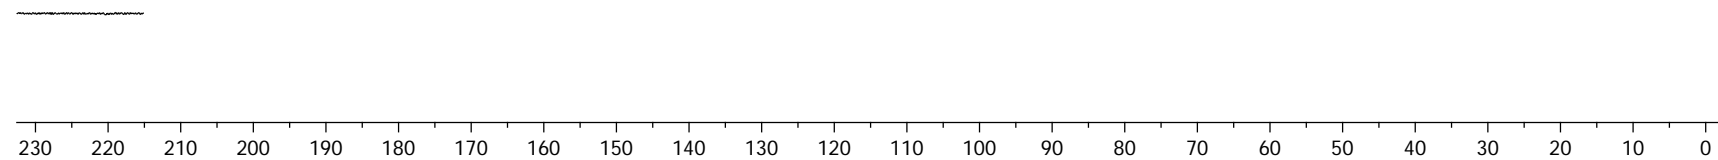

Compound 20b

R949707

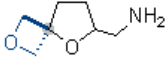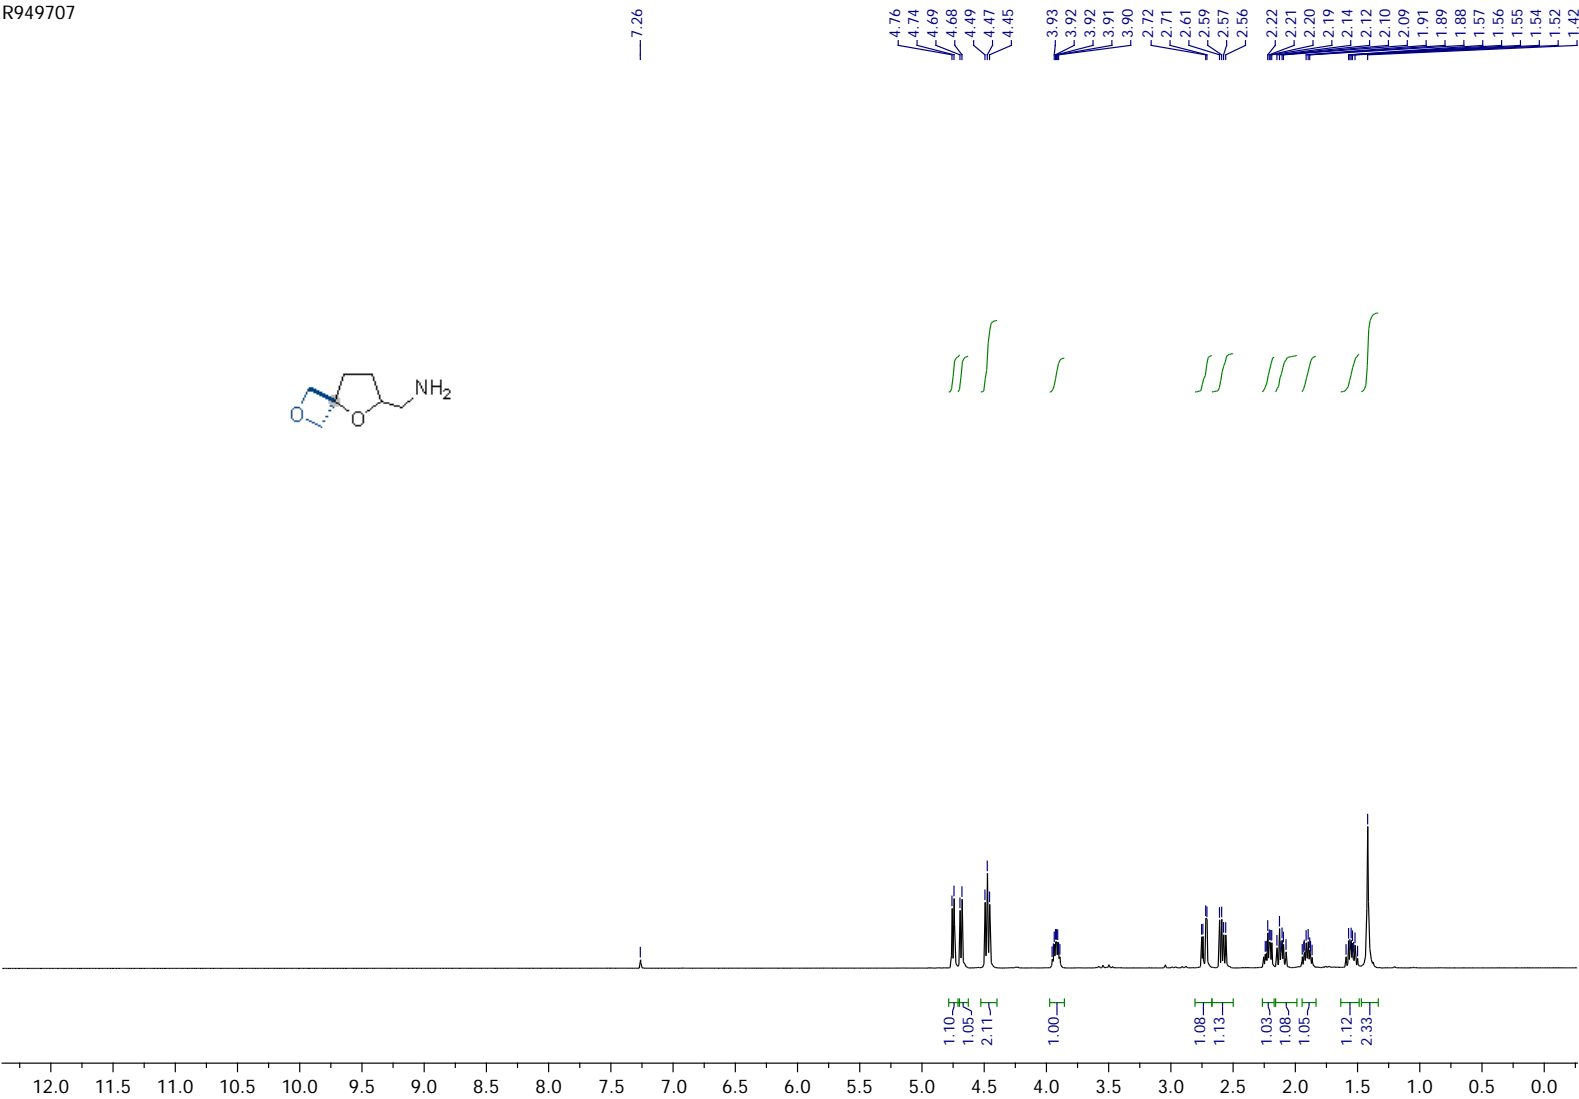



R949707\_13C

XXXXXXXXXXXXXXXXXXXX

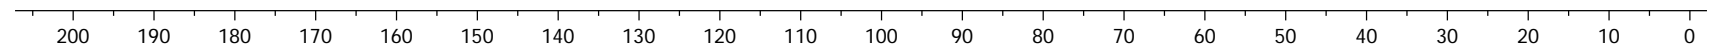

# Compound 21b

R1609012

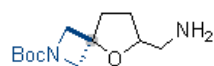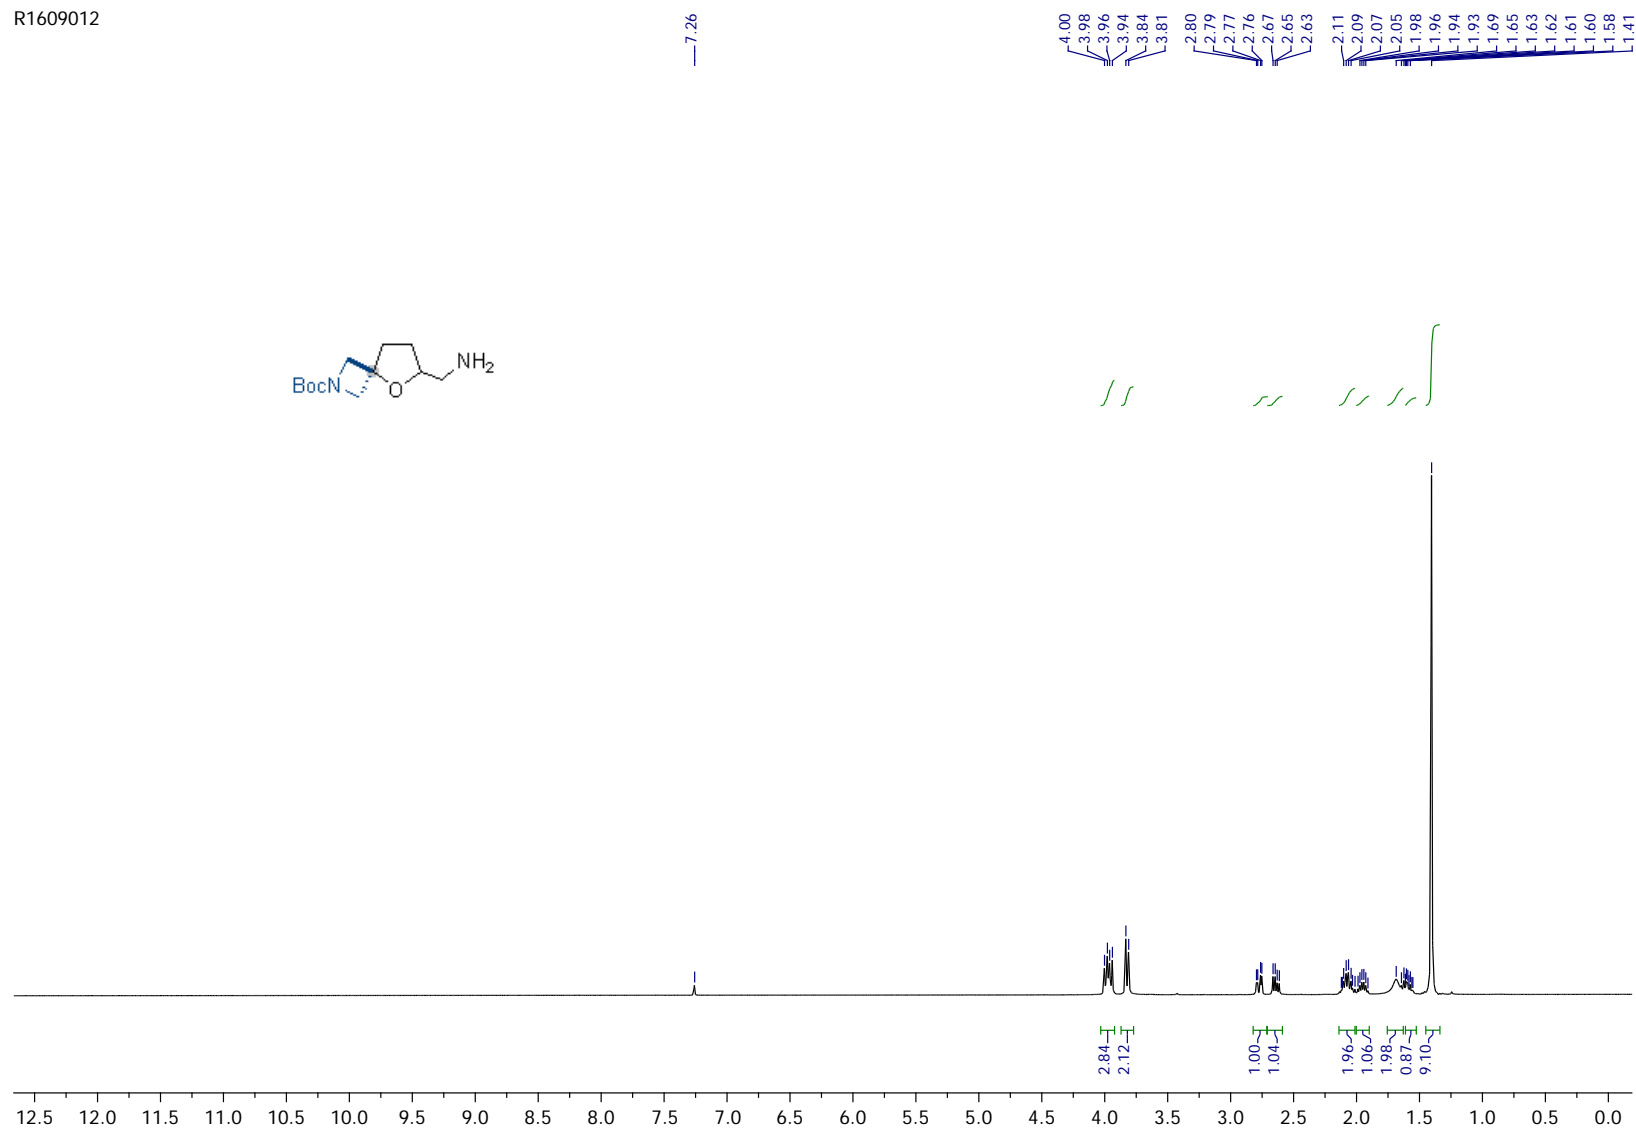

R1609012\_C13

=====

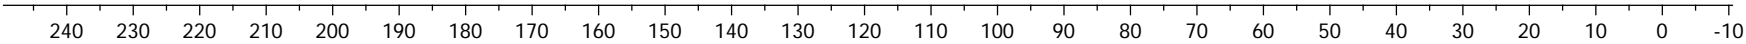

# Compound 22b

R825976

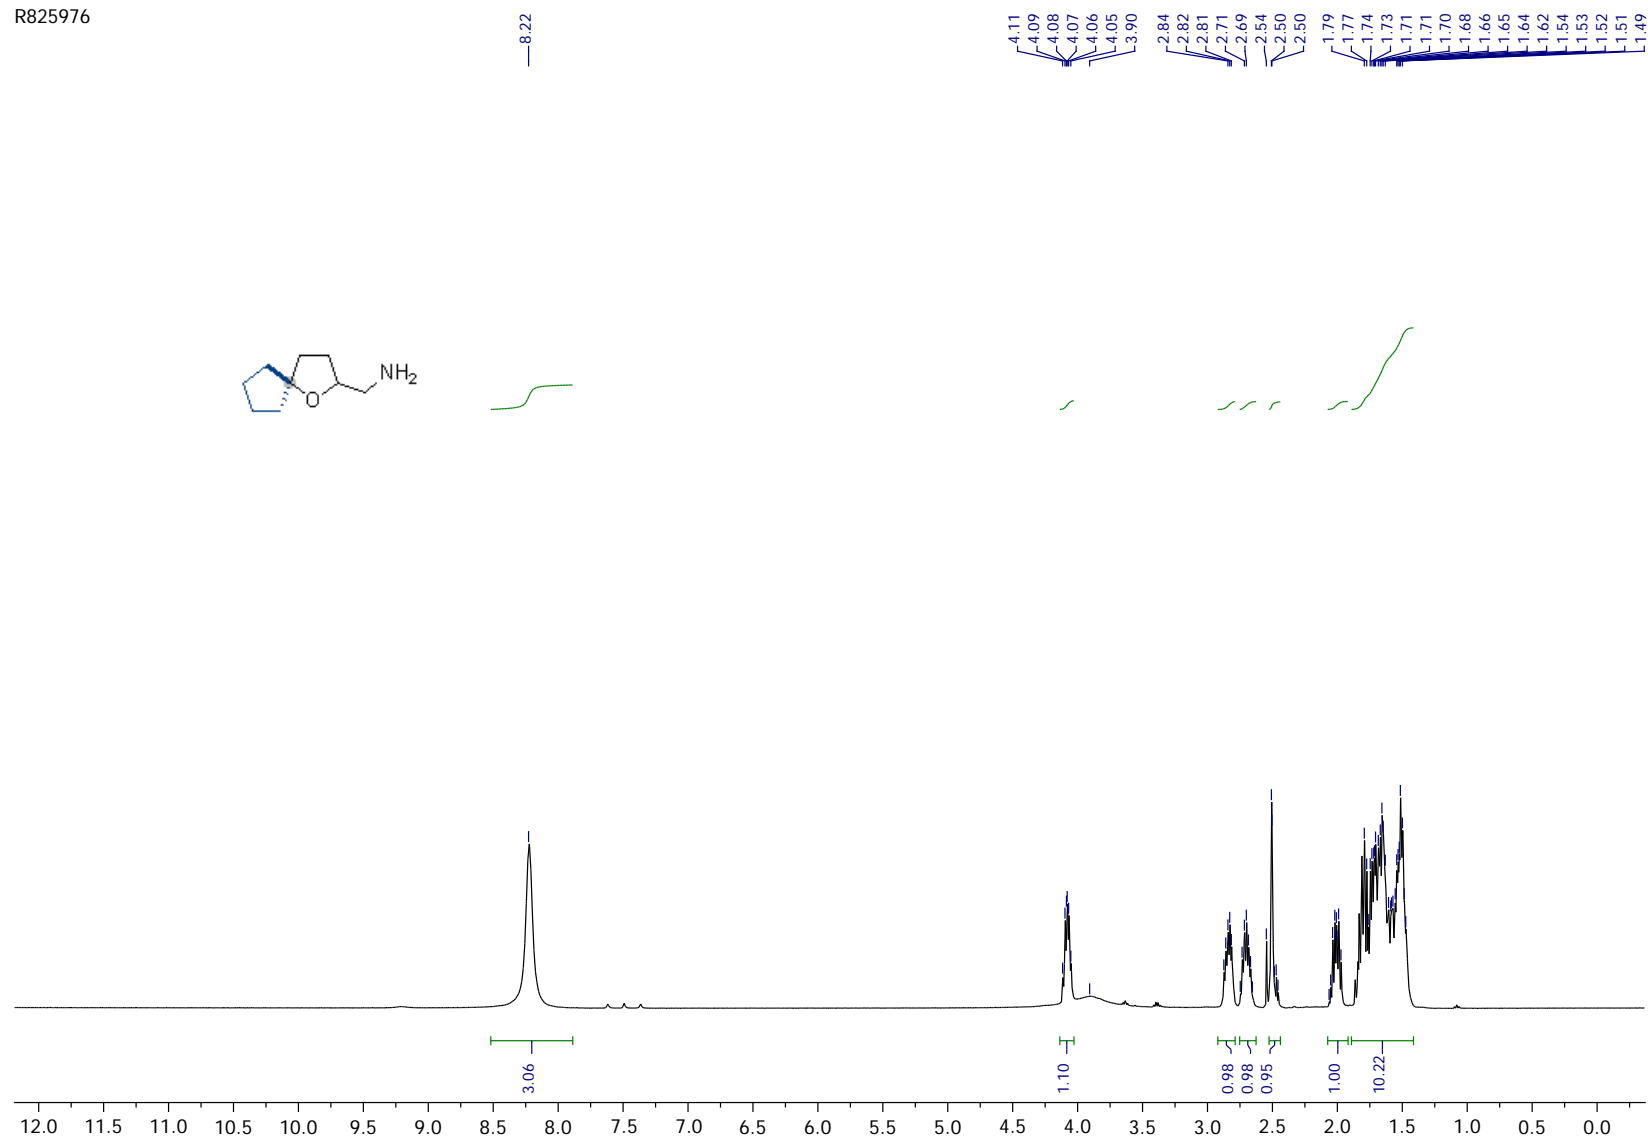

R825976\_13C

|||||

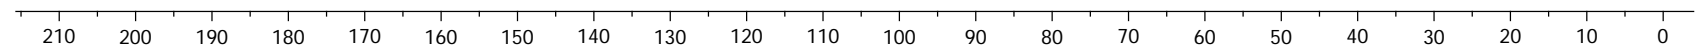

### Compound 23b

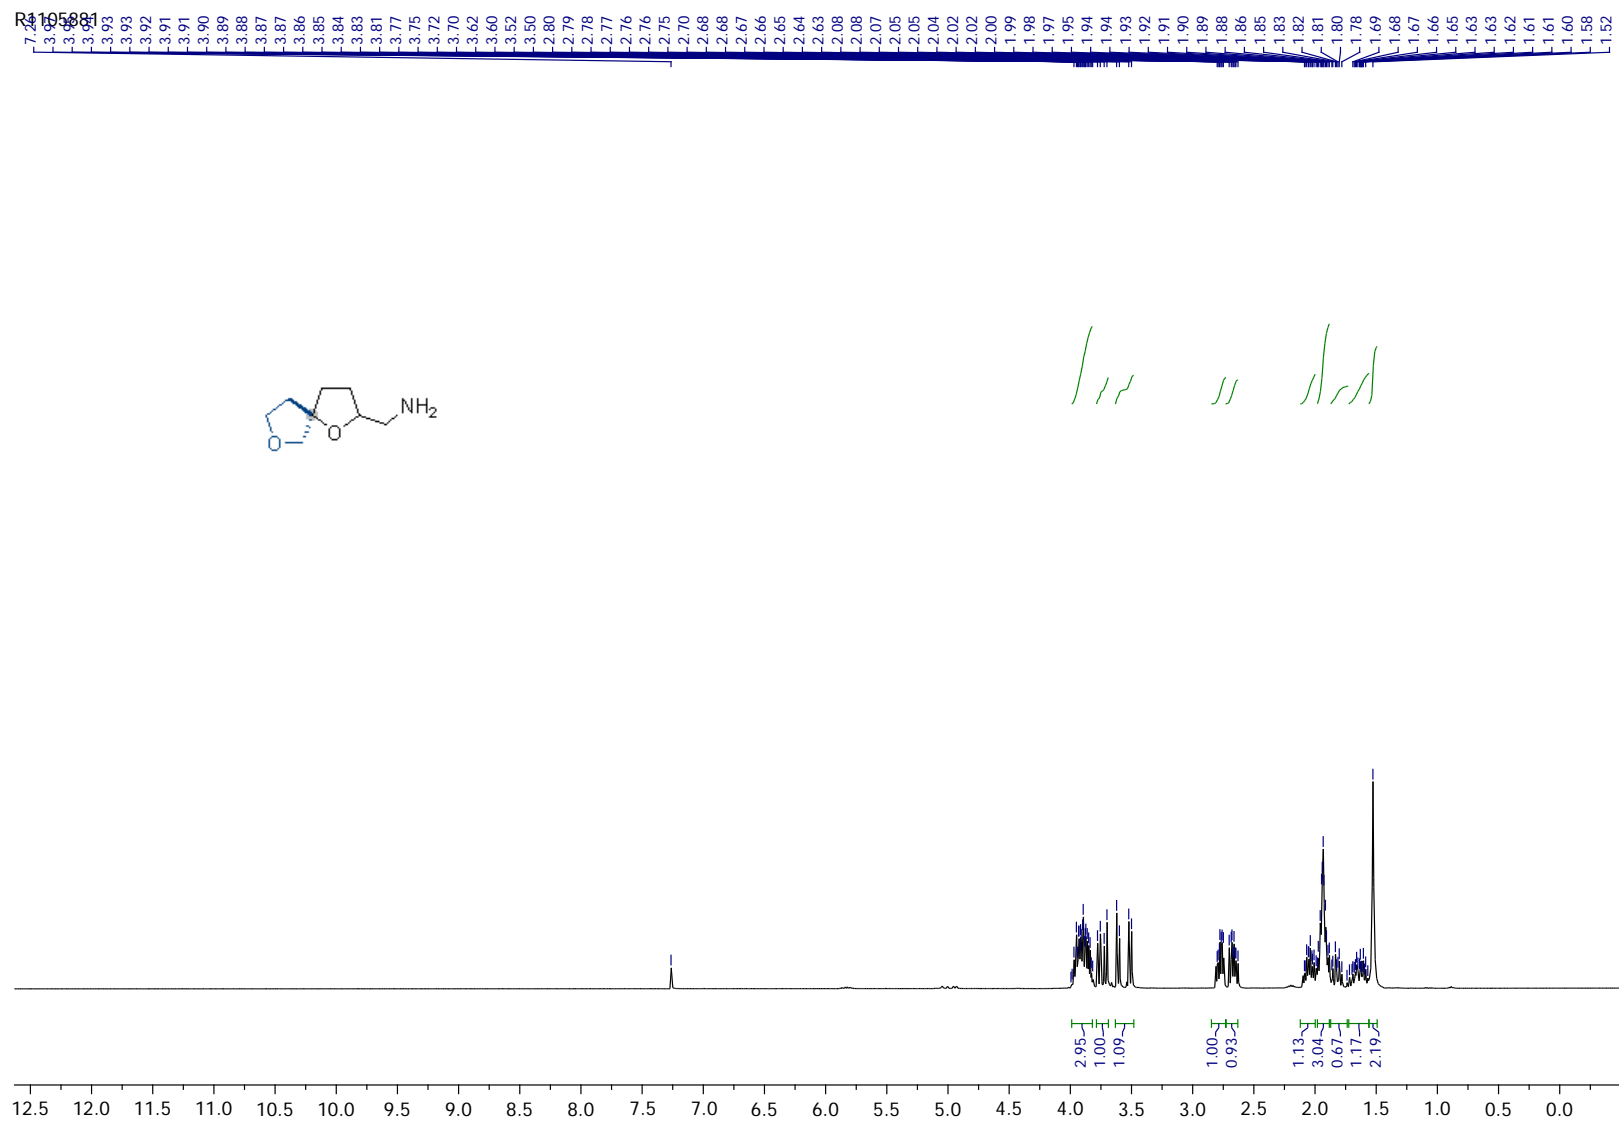

R1105881\_C13

www.ck12.org/ck12-programs/ck12-101

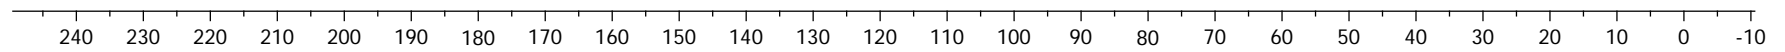

Compound 24b

R182798

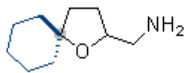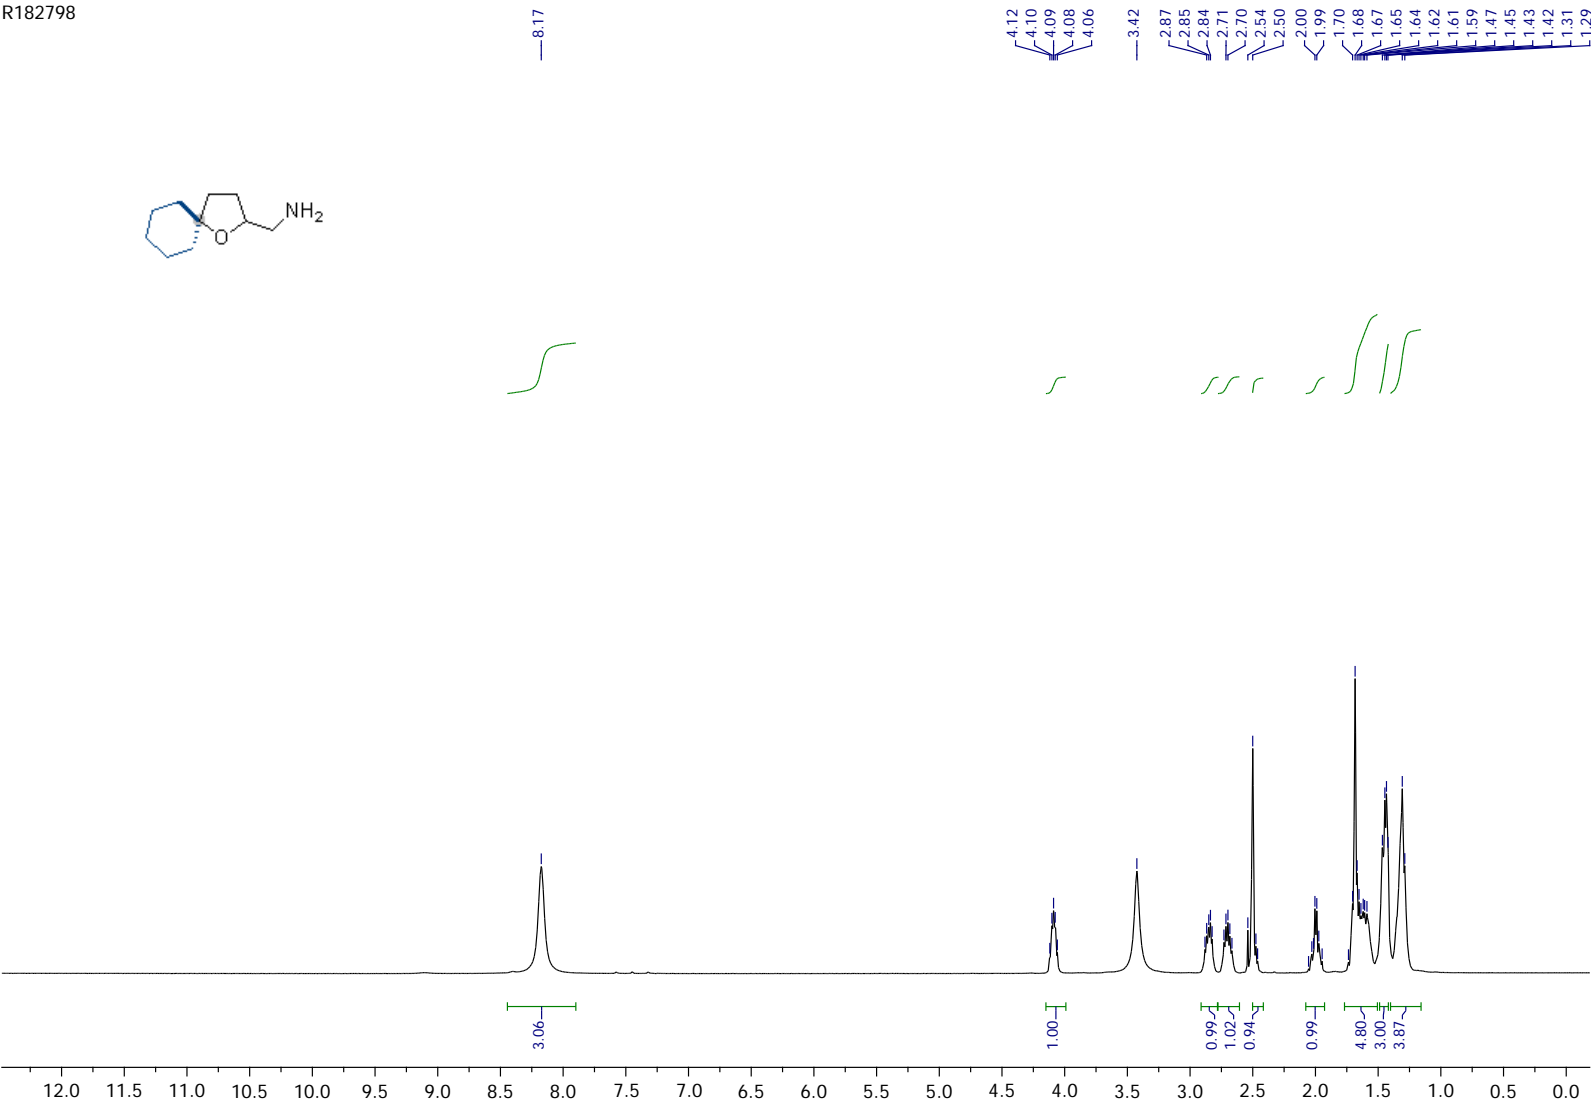



R182798\_C13

|||||

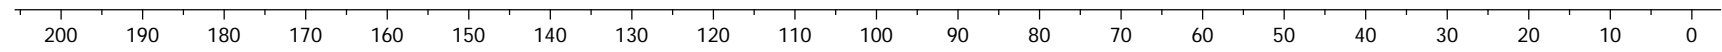

# Compound 25b

R2368279

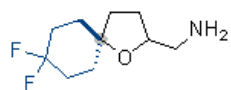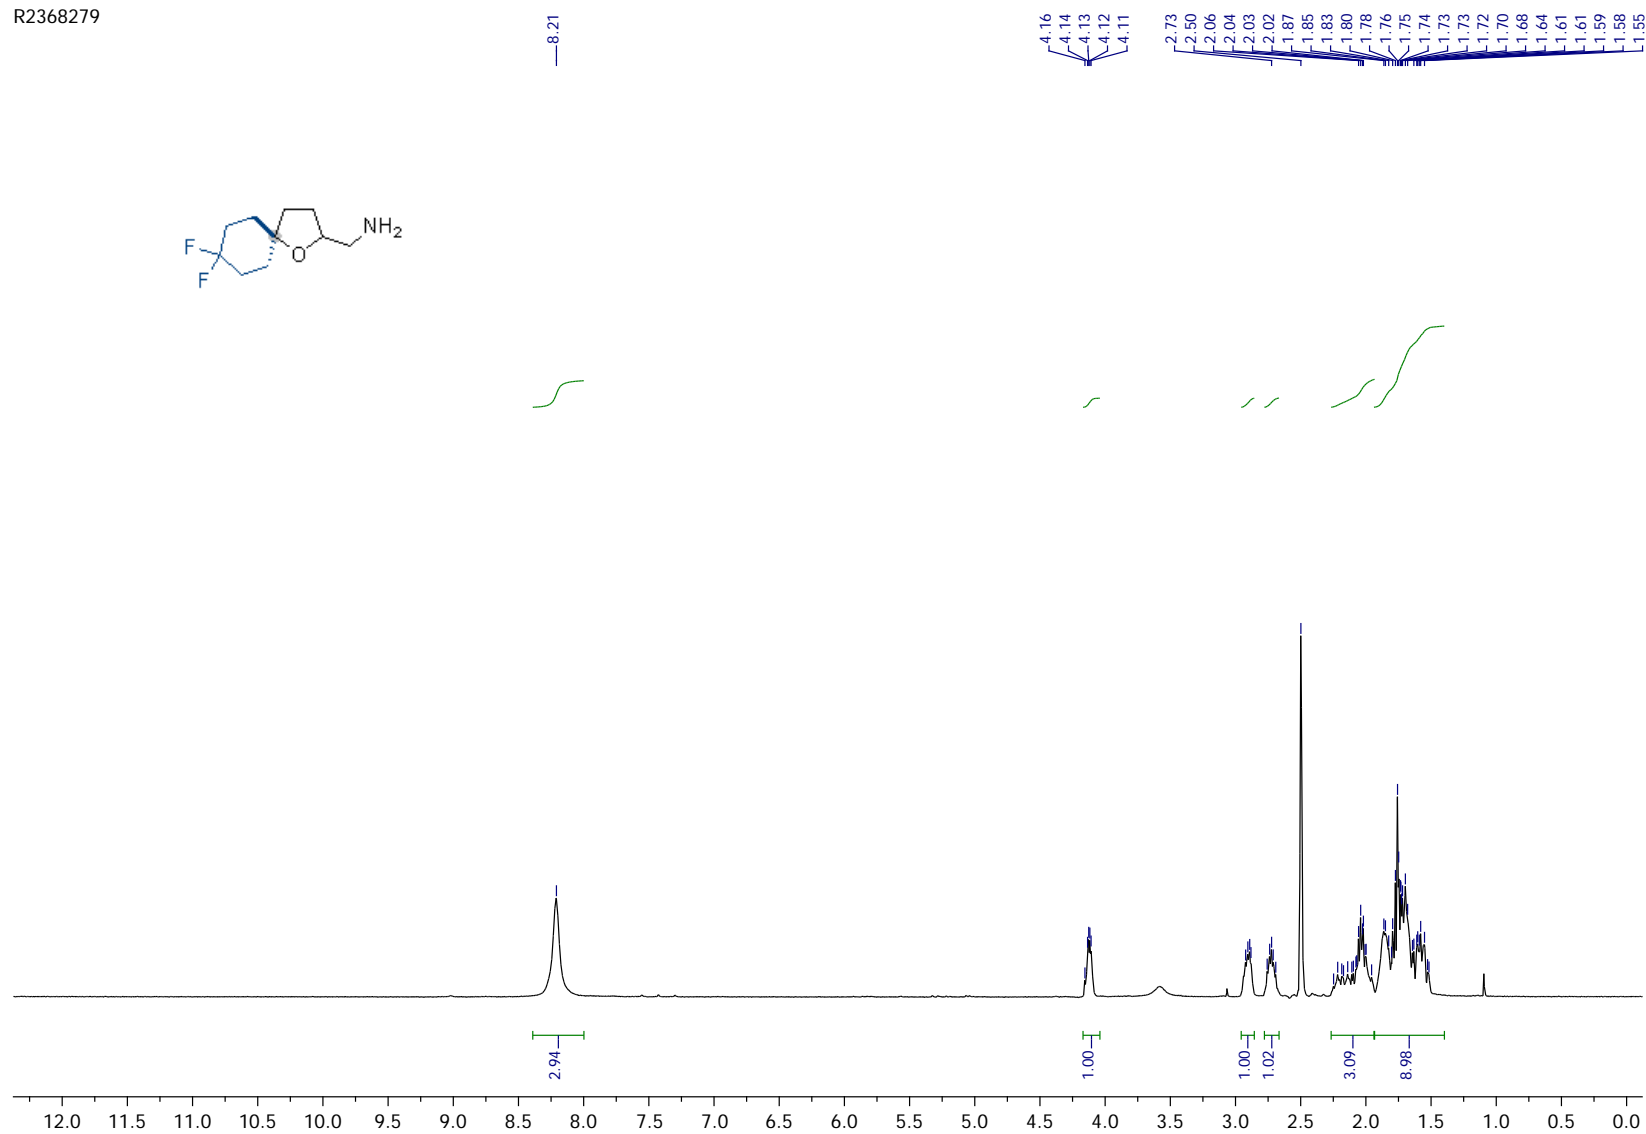

R2368279\_C13

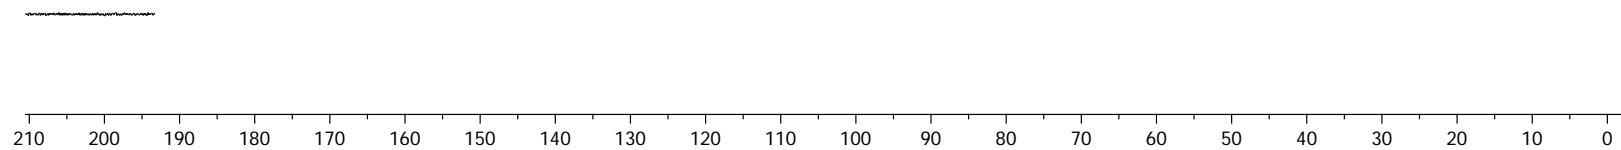

# Compound 26b

R1193044

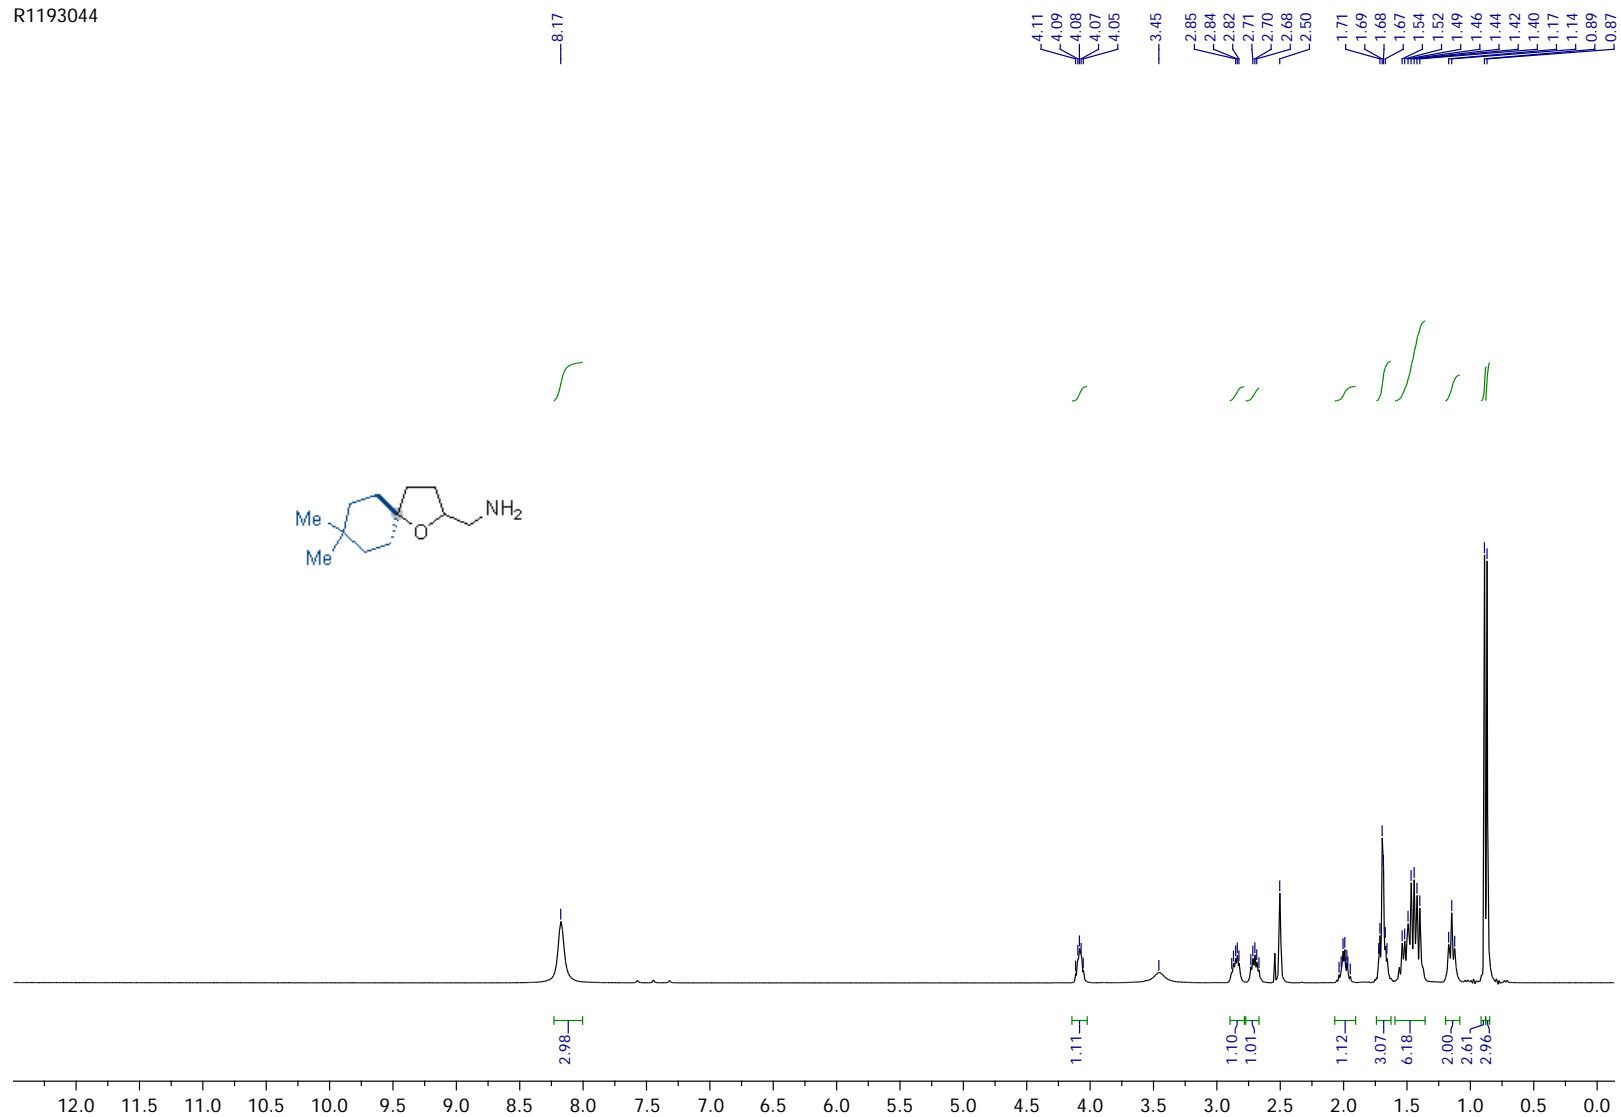

R1193044\_13C

## A

malheur, et de la mort.

# Compound 27b

R879140

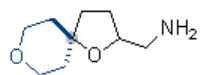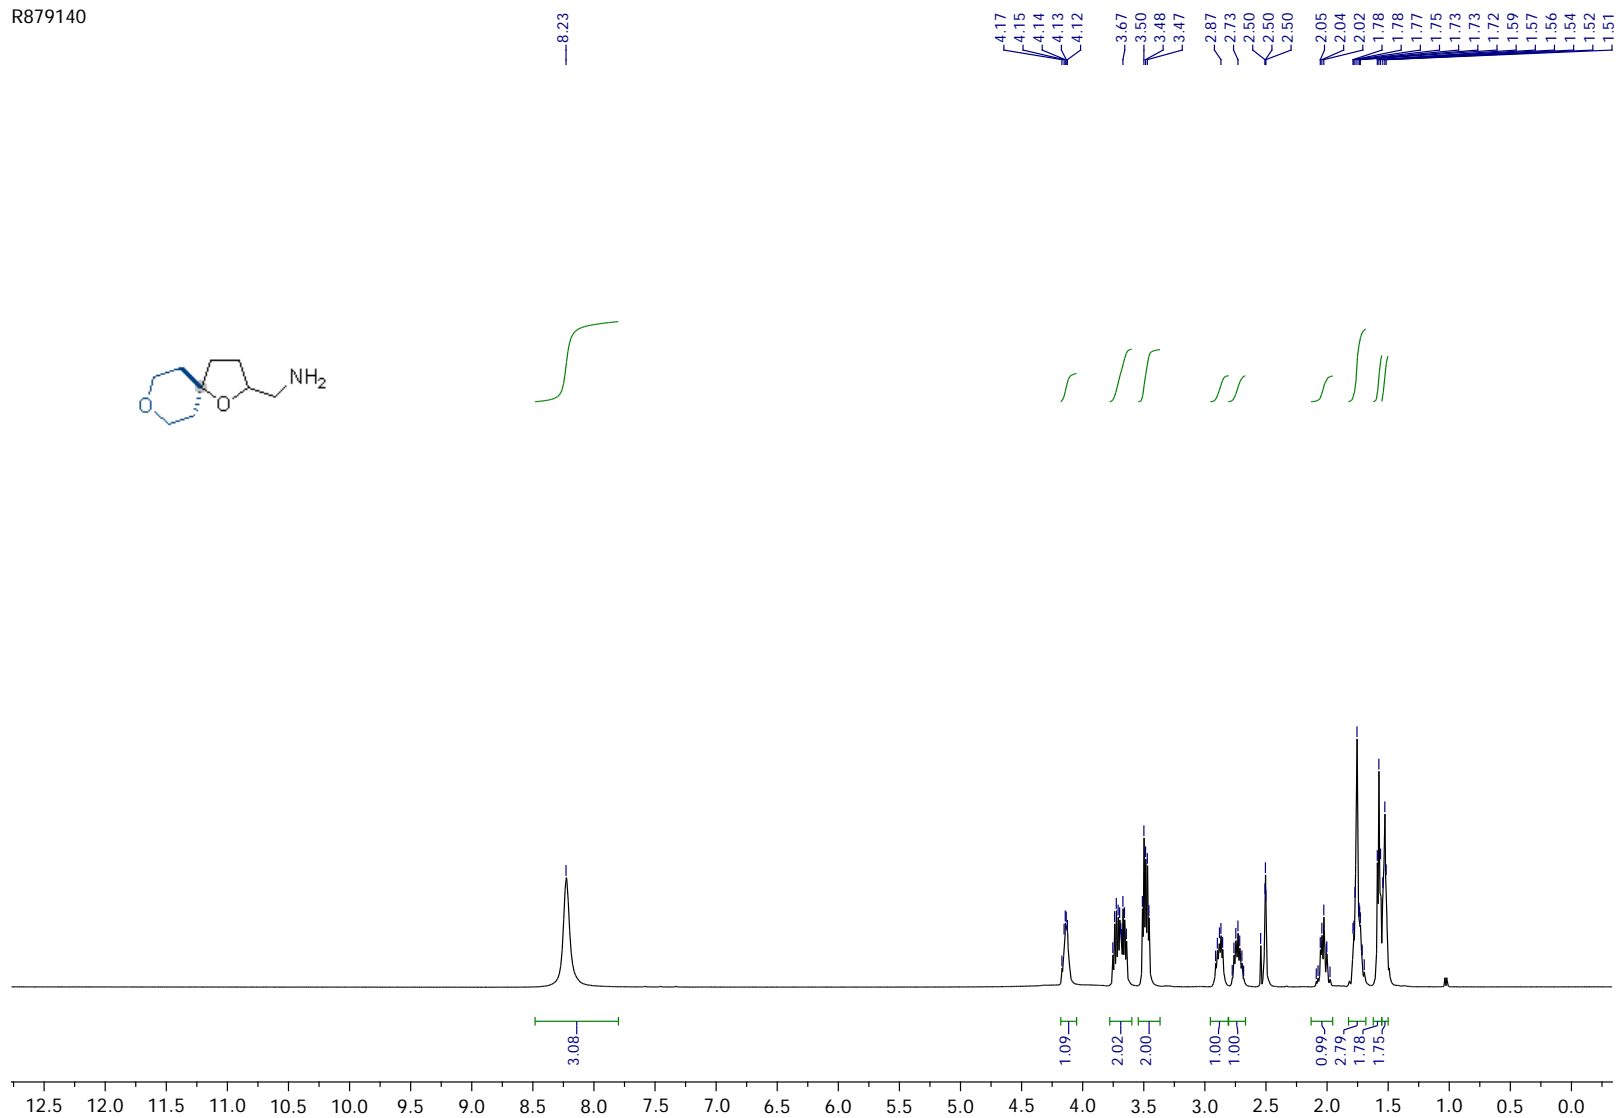

R879140\_C13

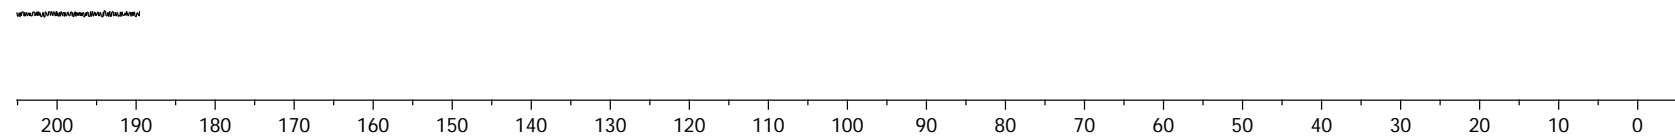

Compound 28b

R1132359

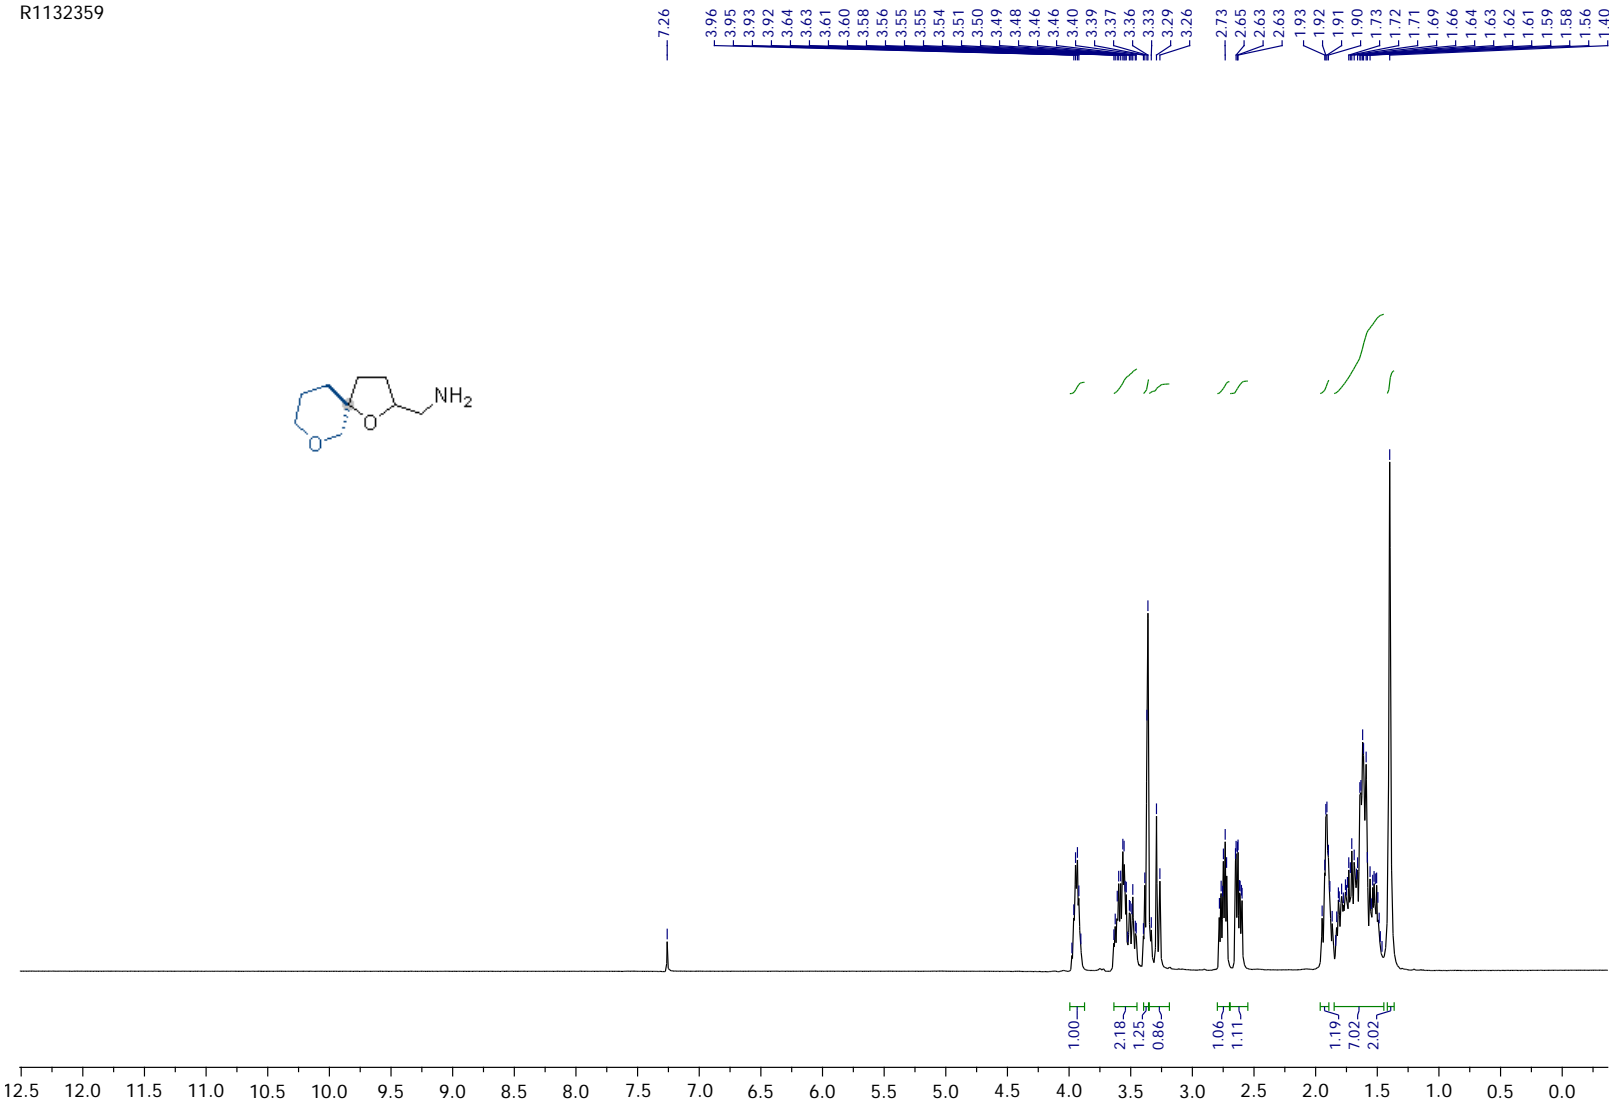



R1132359\_C13

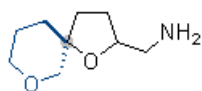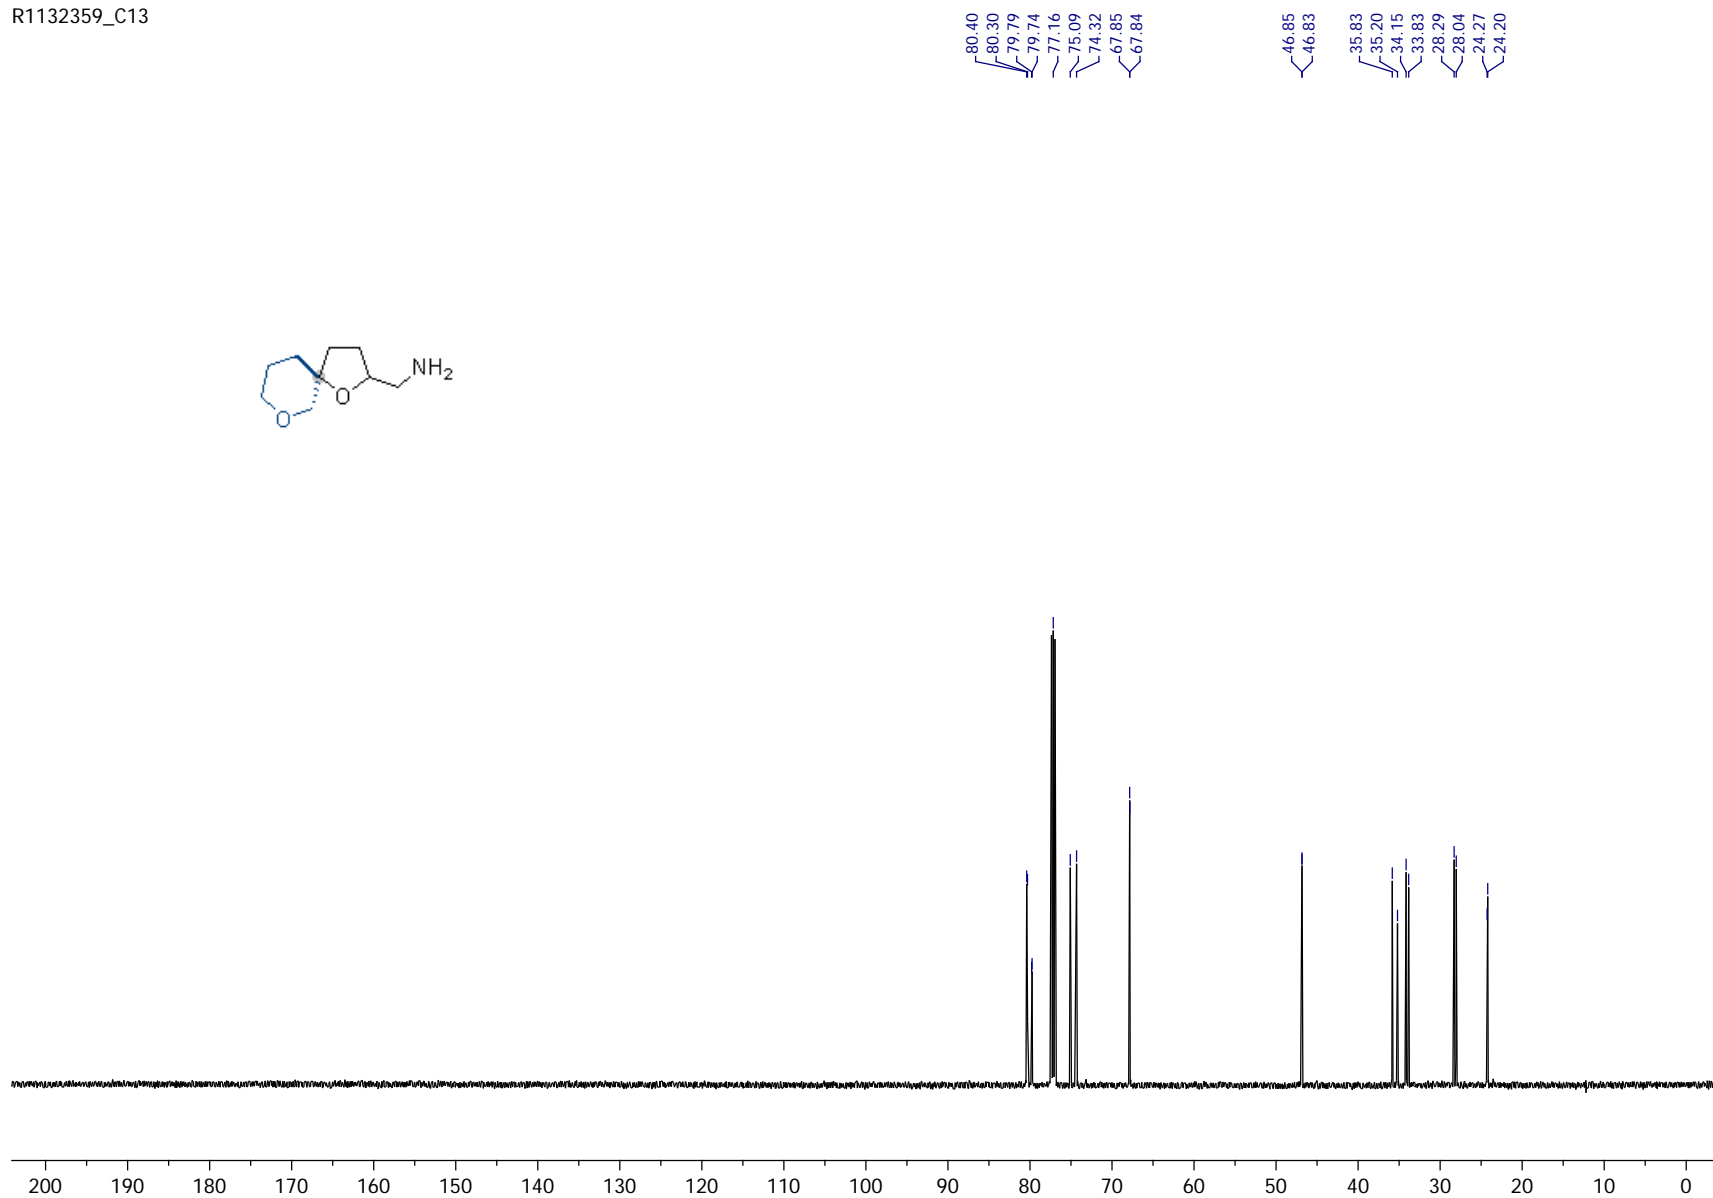

Compound 29b

R1629179

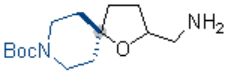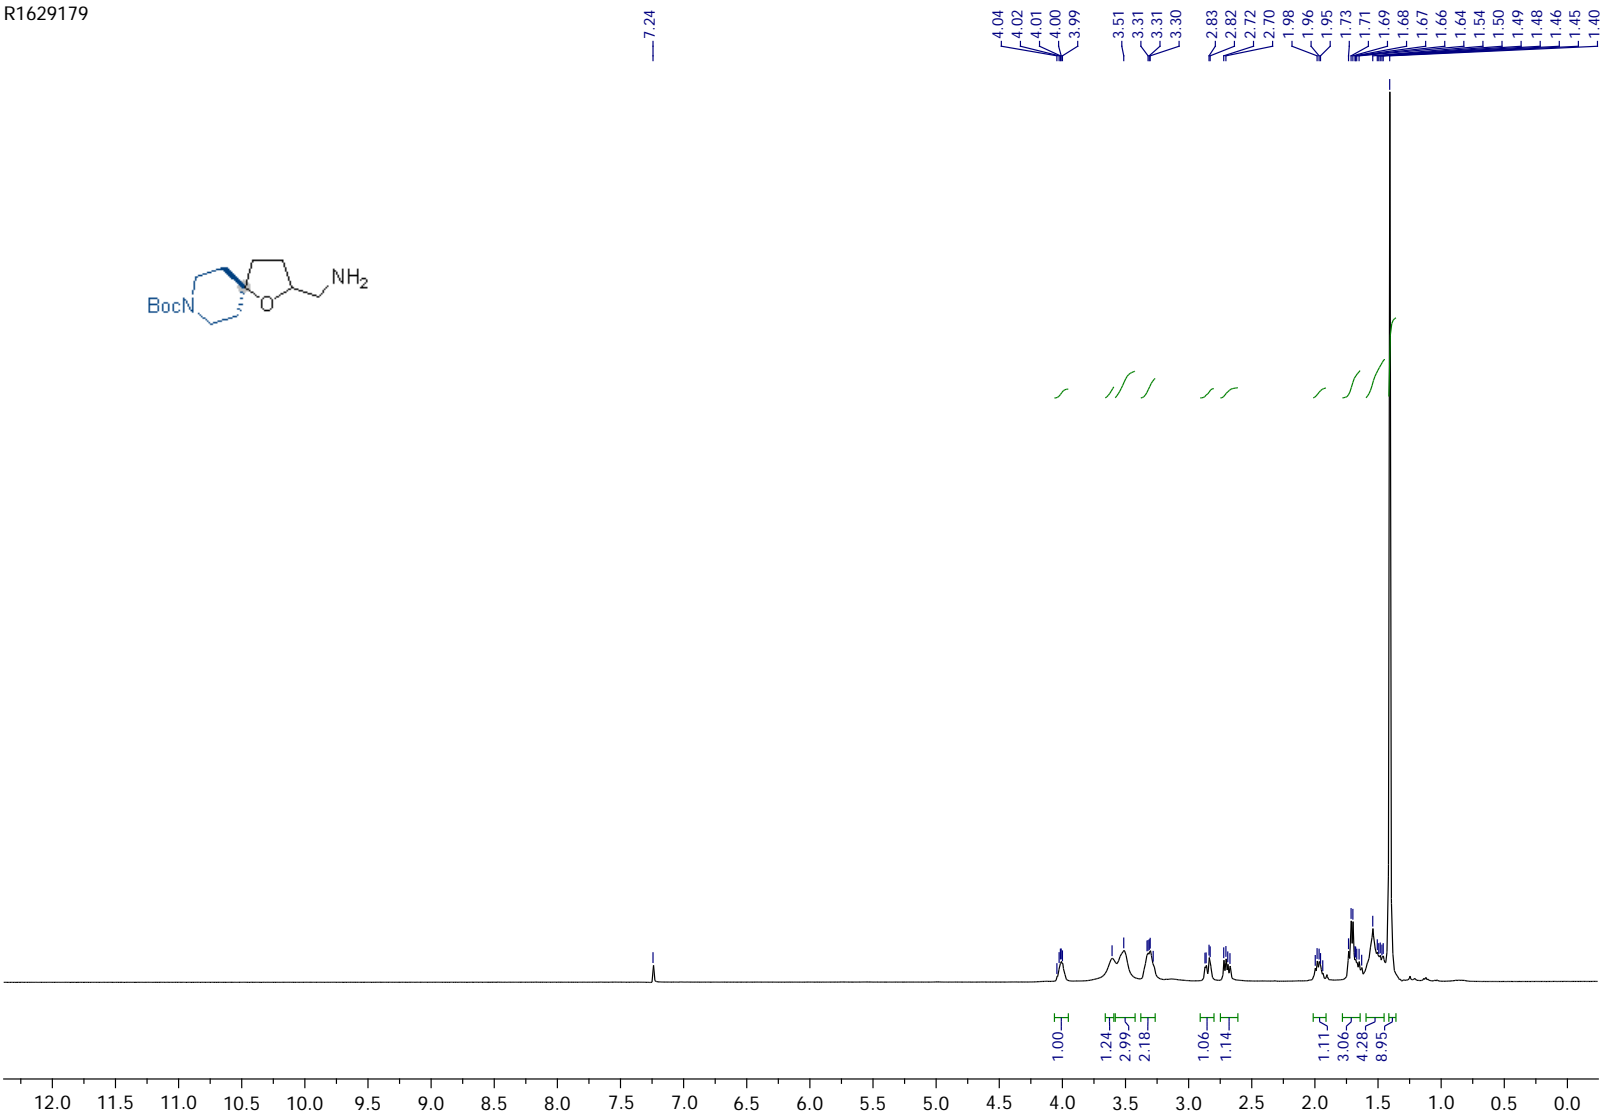



Compound 30b

R945325

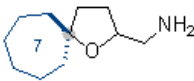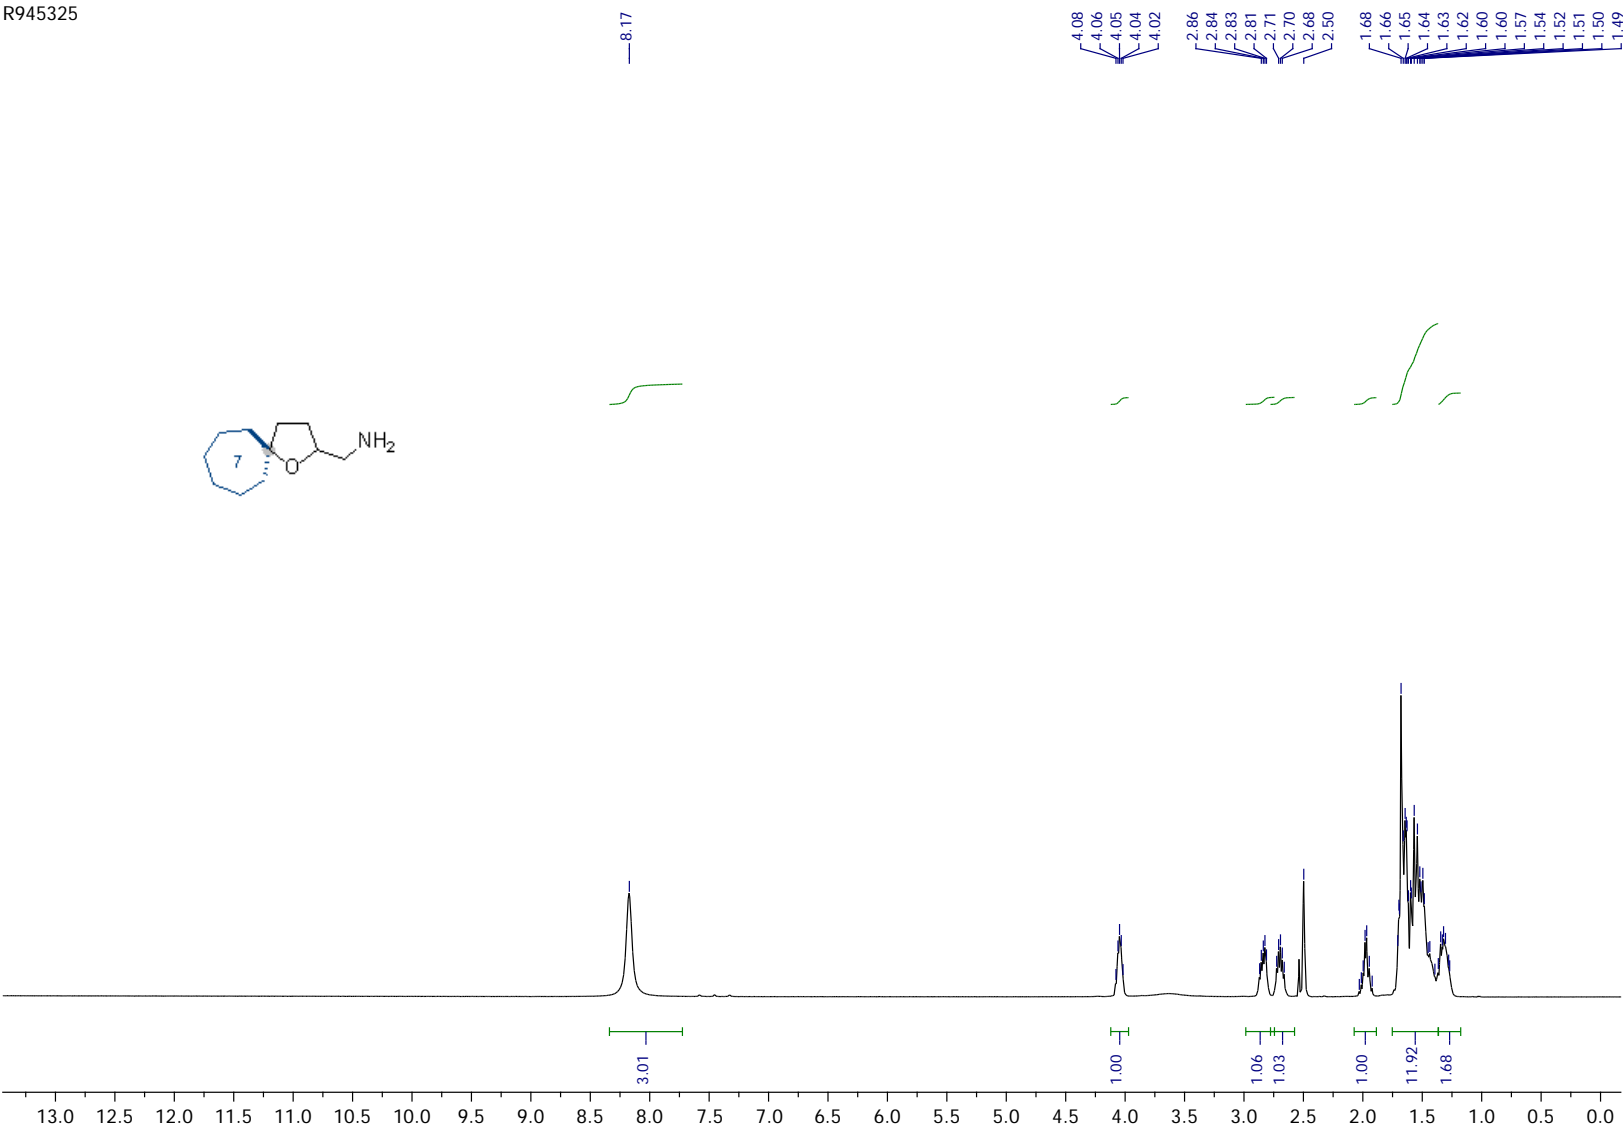

R945325\_C13

|||||

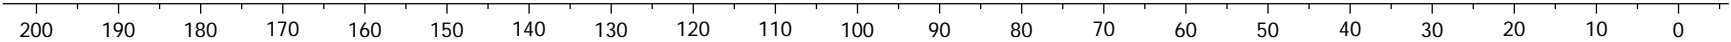

# Compound 31b

R1357058

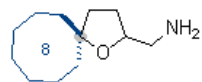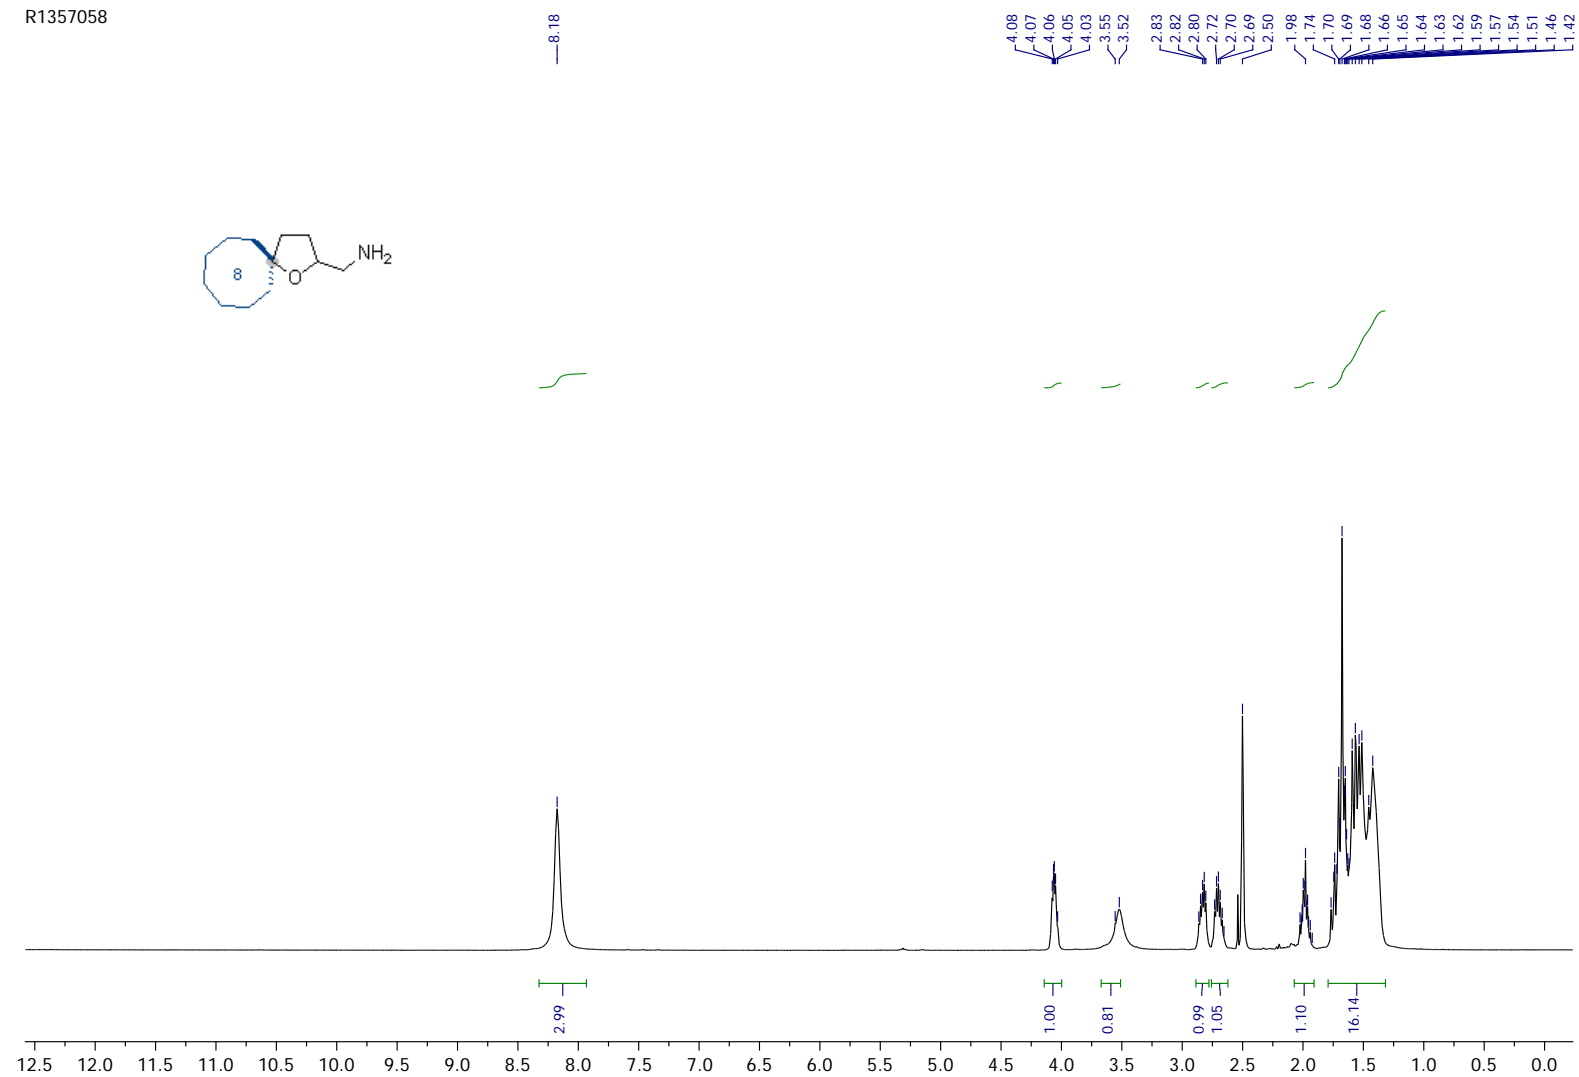

R1357058\_C13

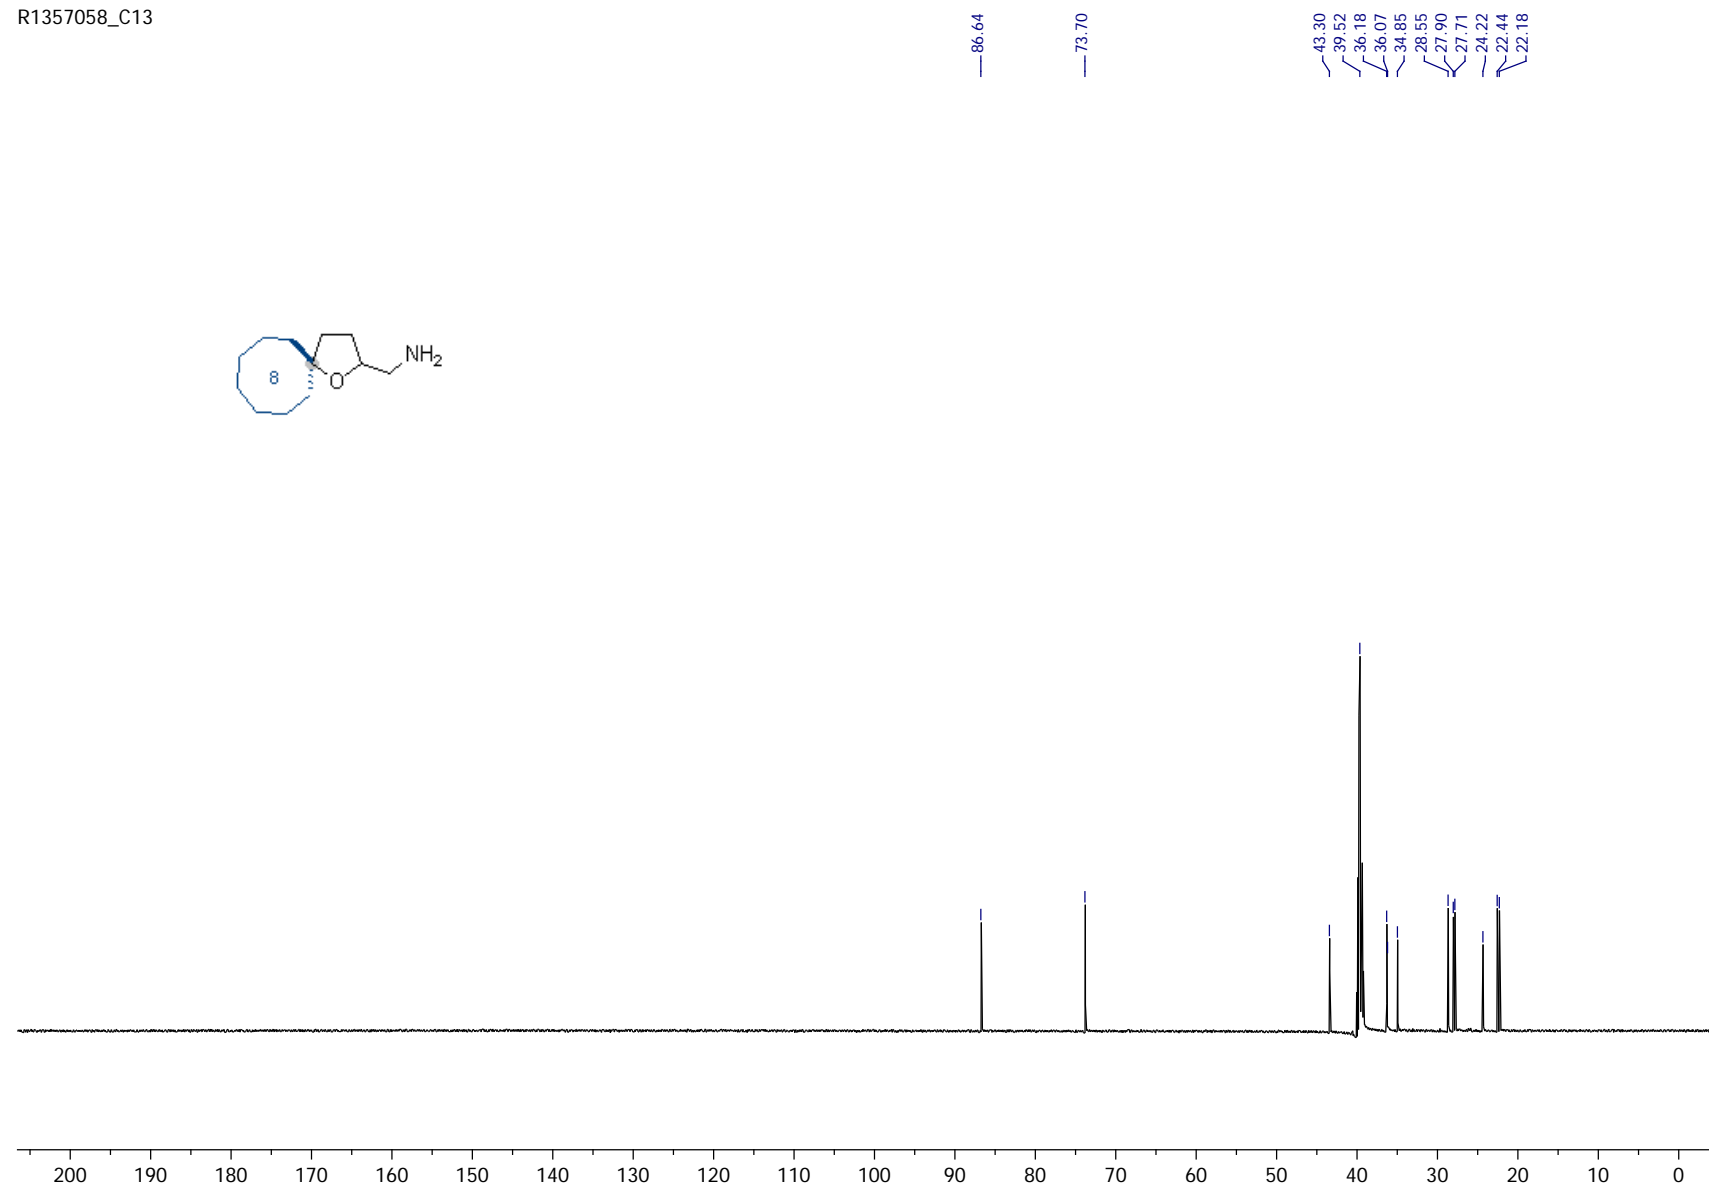

Compound 32b

R1617310

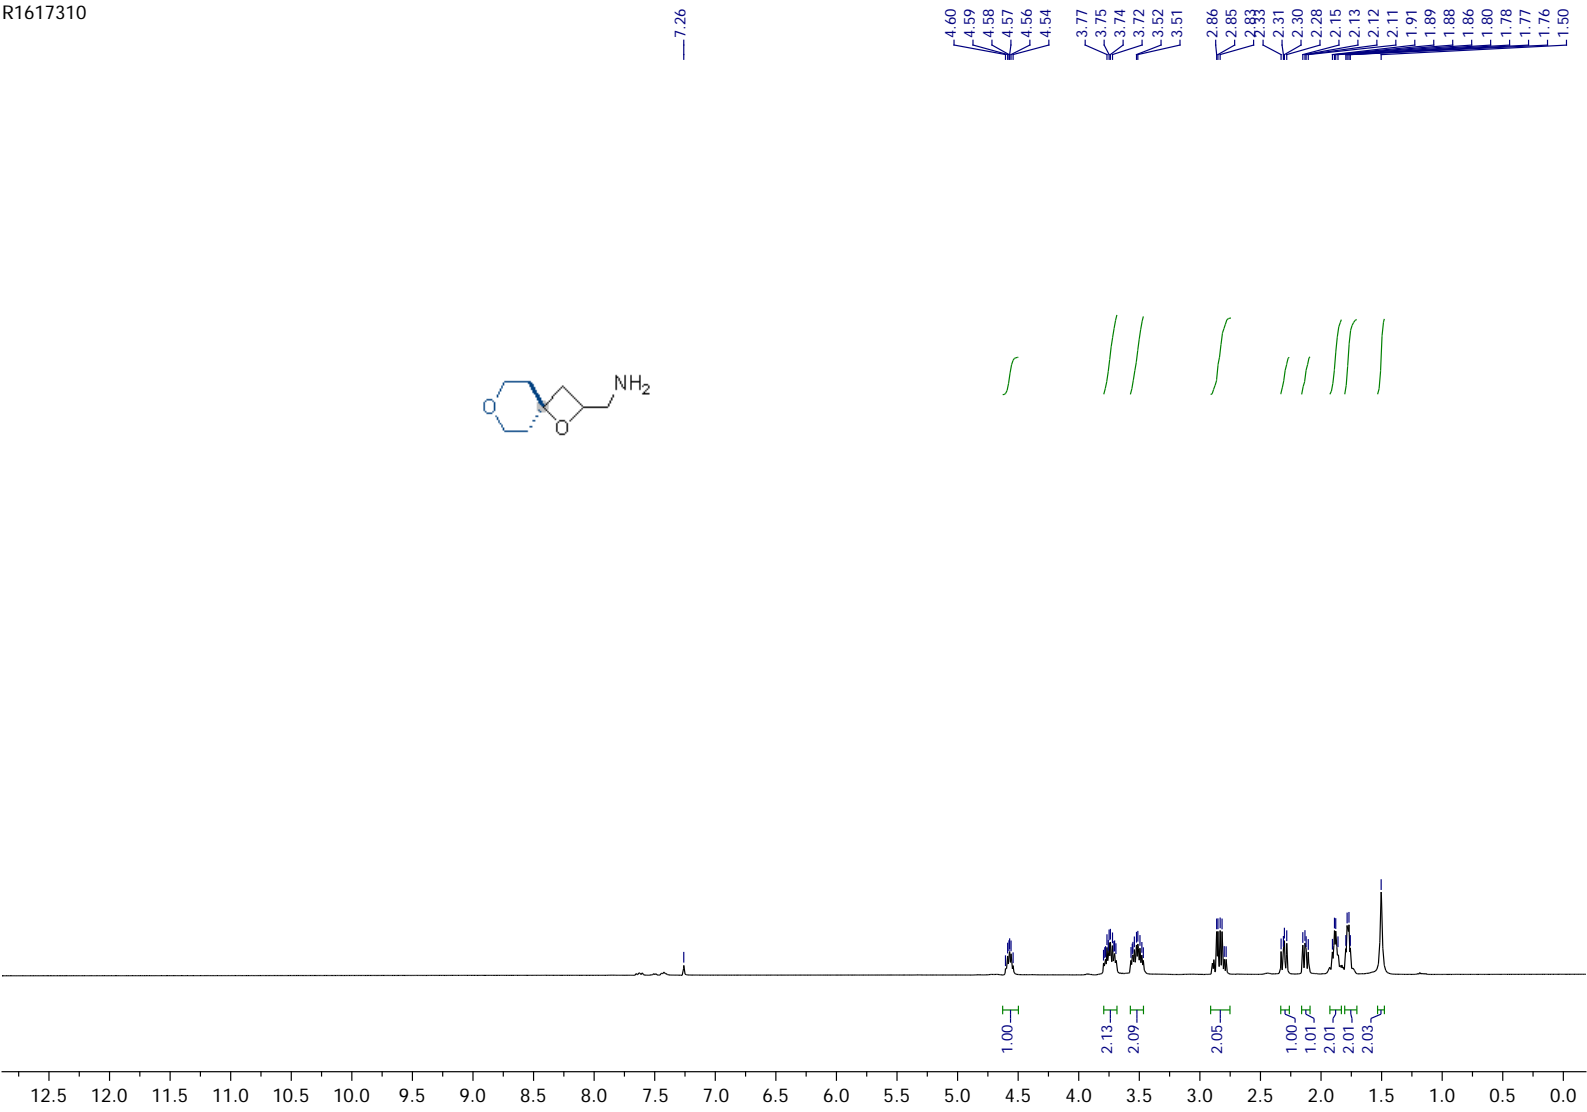



R1617310\_C13

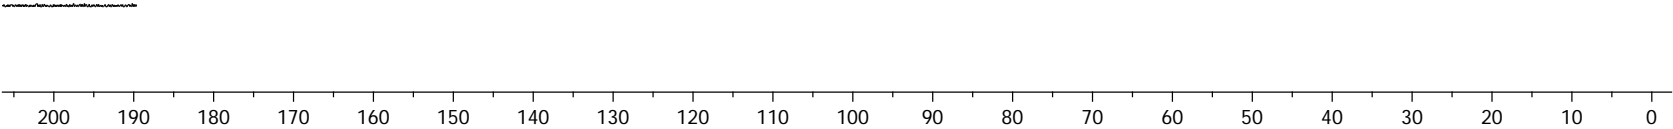

Compound 33b

R1599065

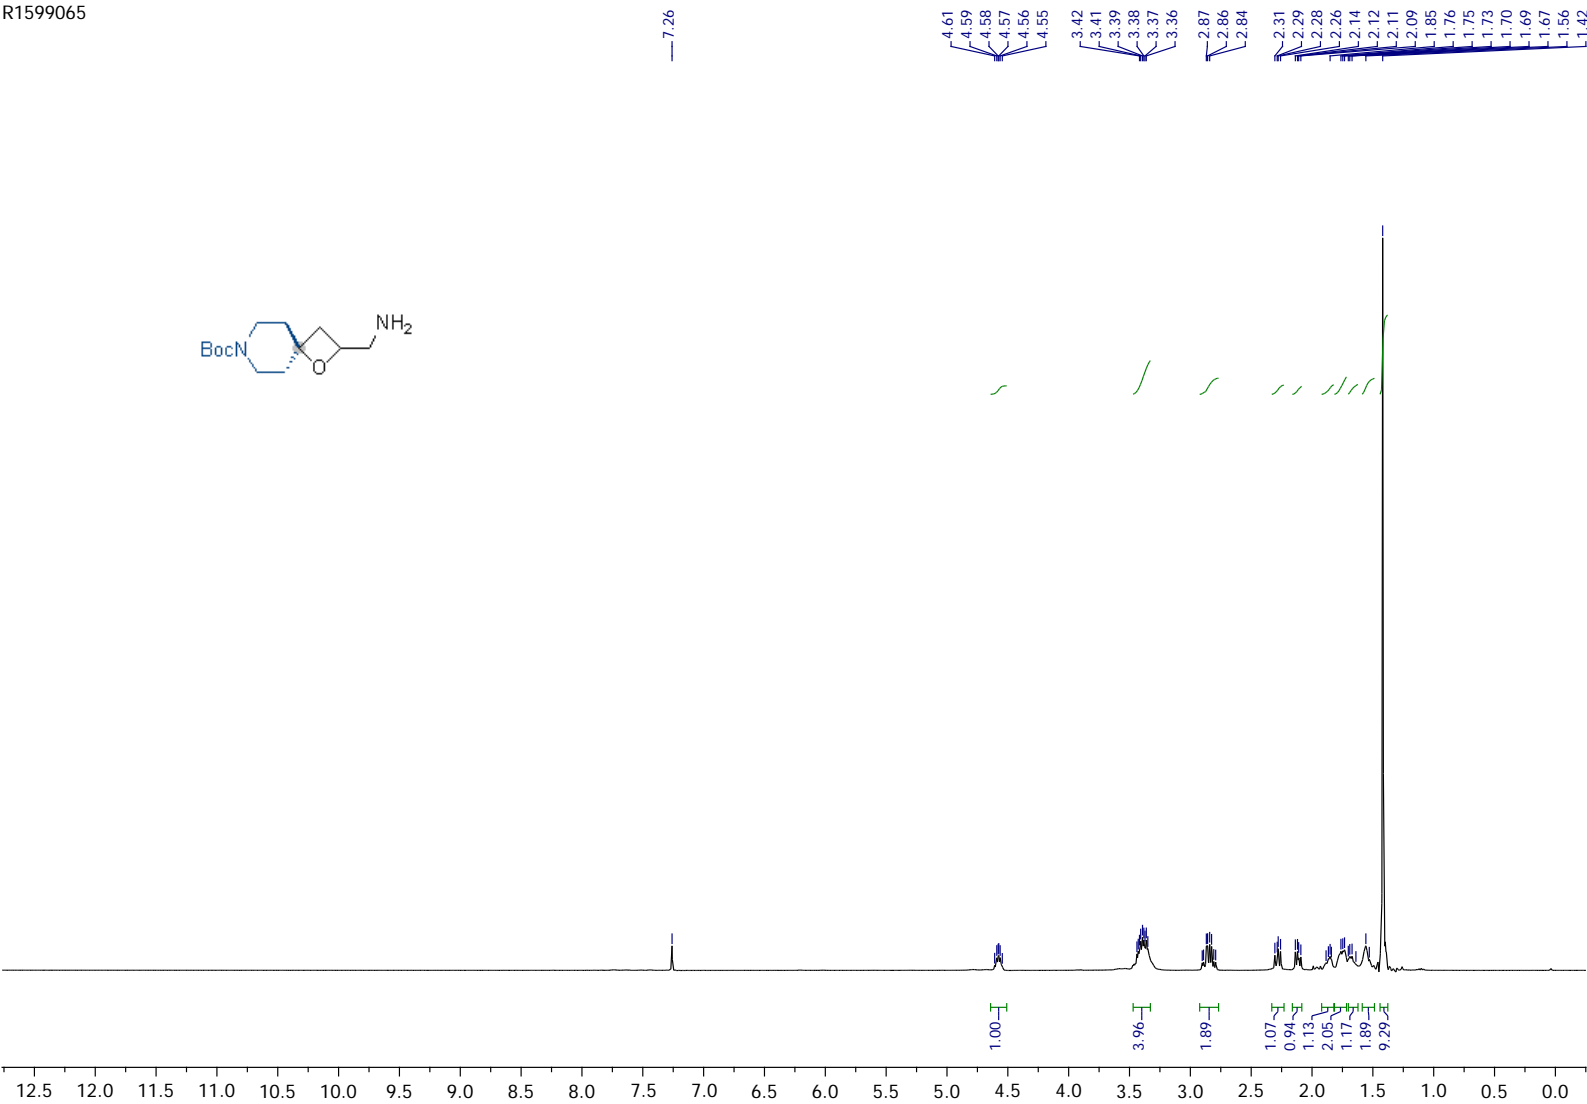

R1599065\_C13

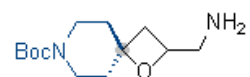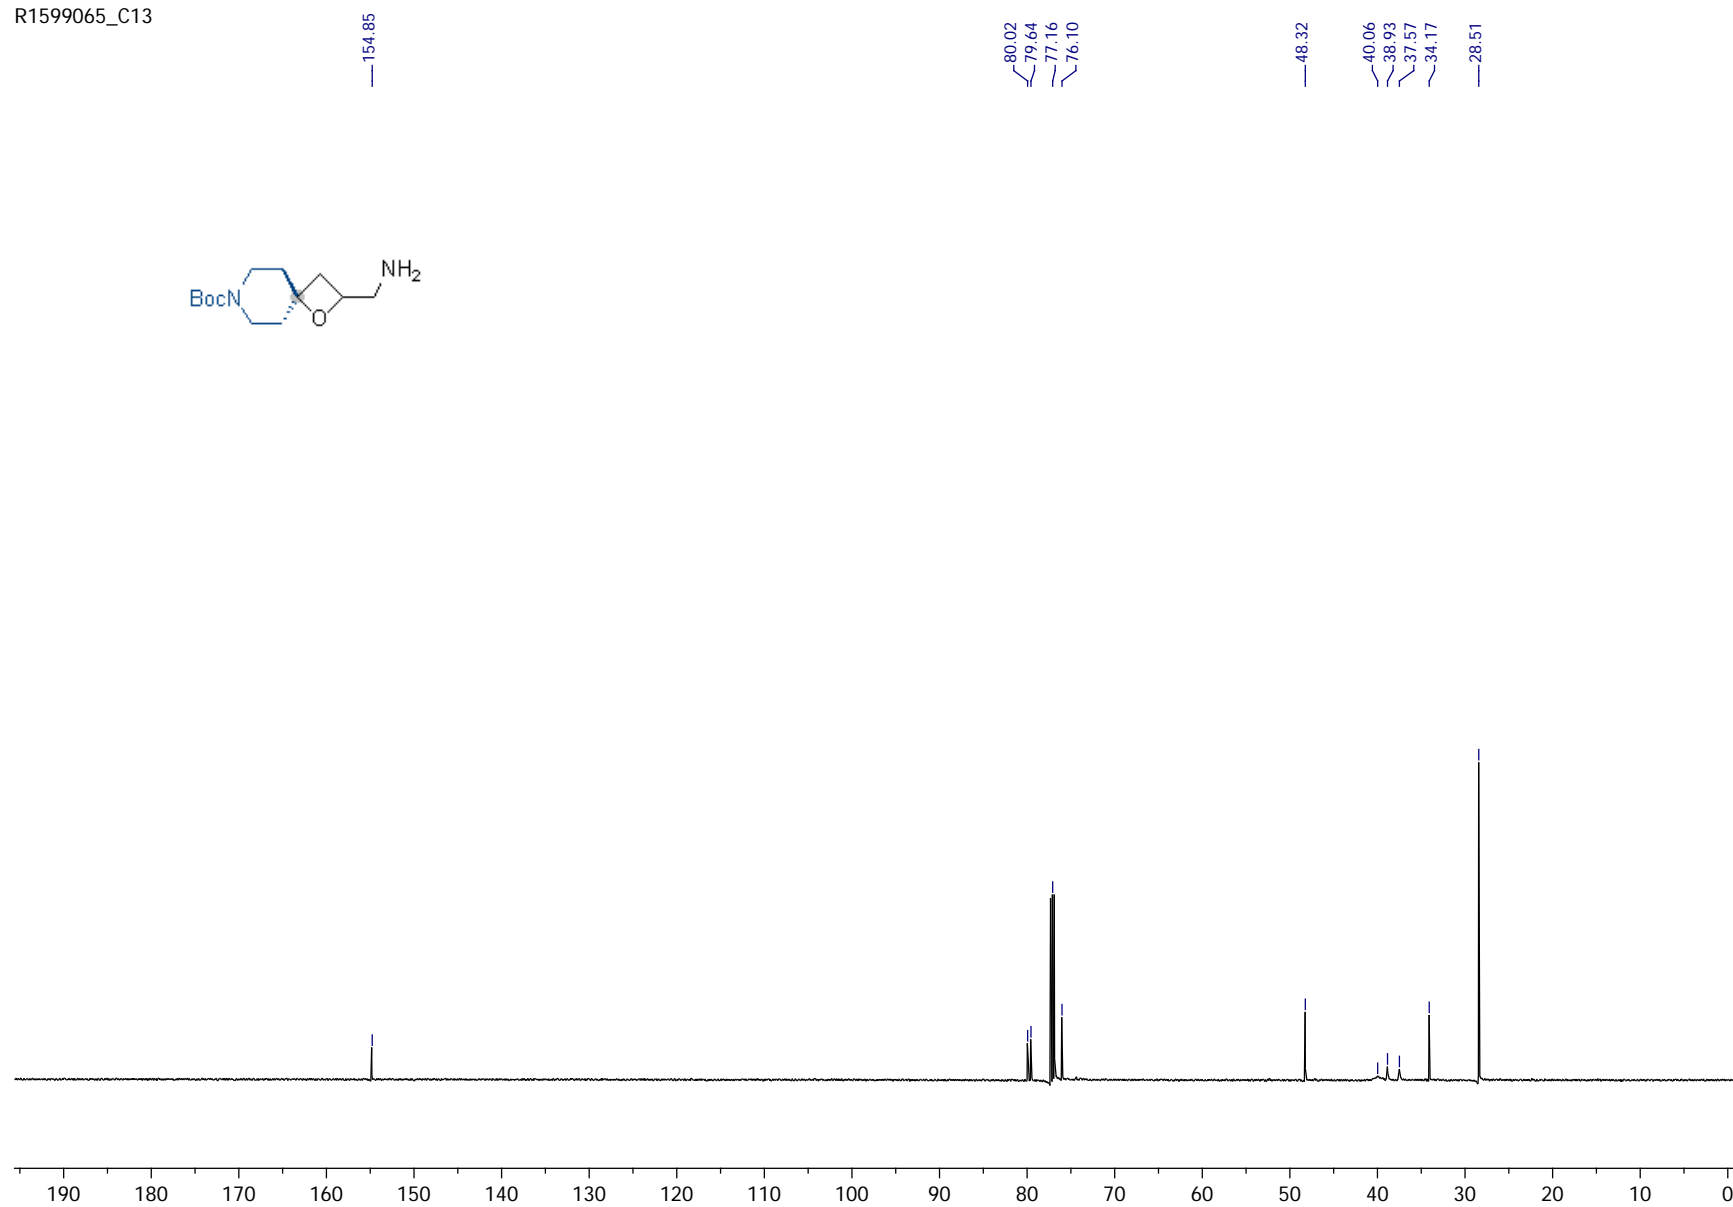

# Compound 34b

R837777+E

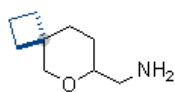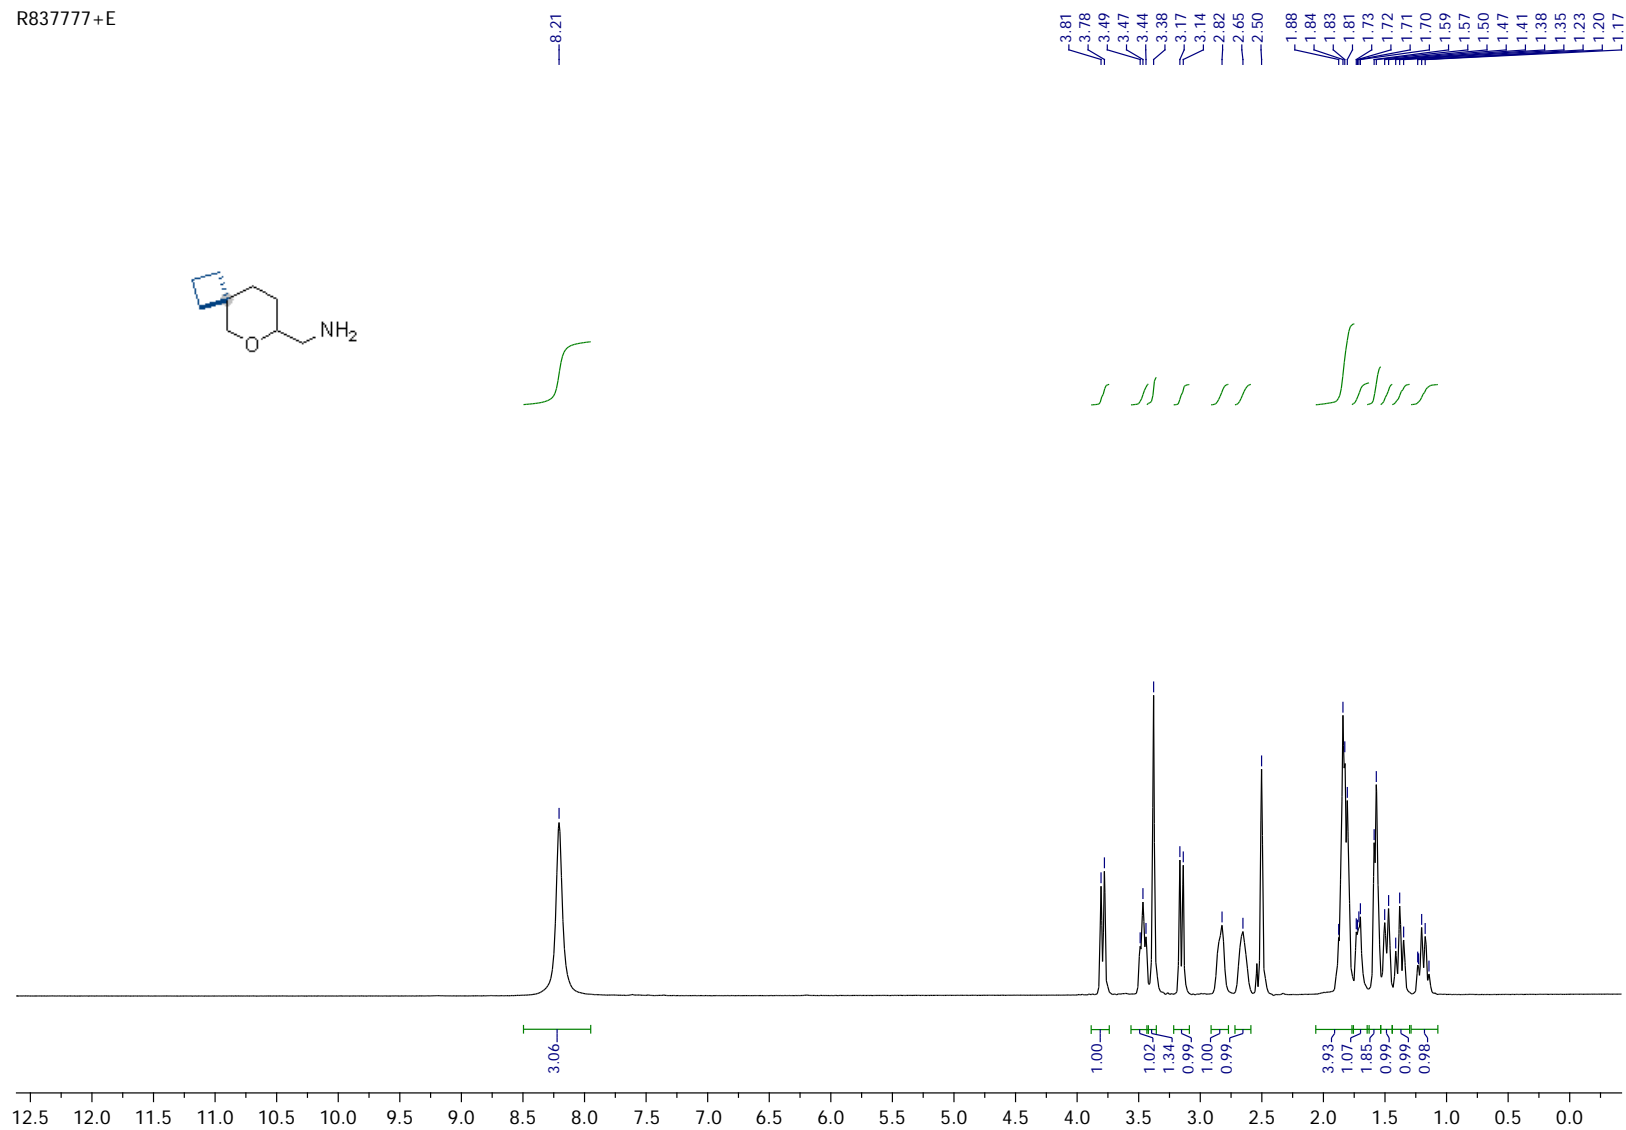

R837777+E\_C13

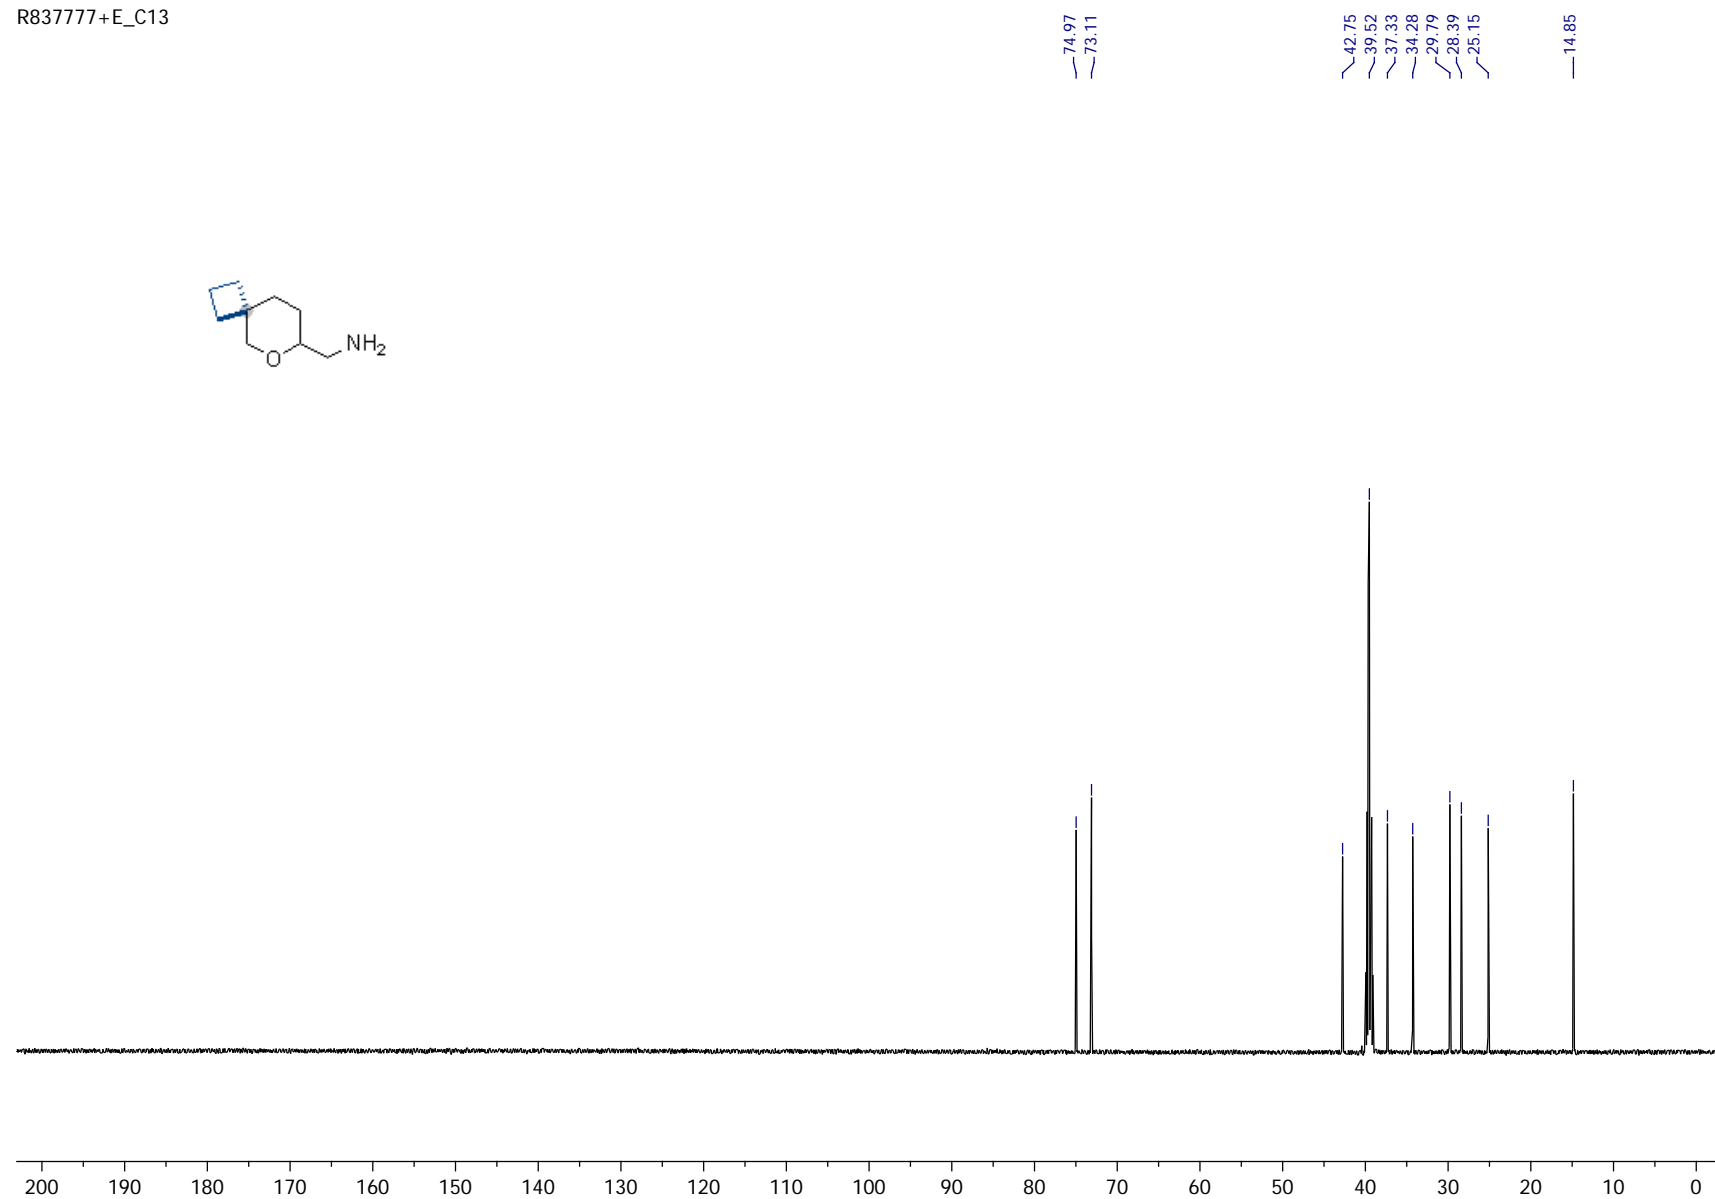

Compound 35b

R1776554

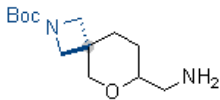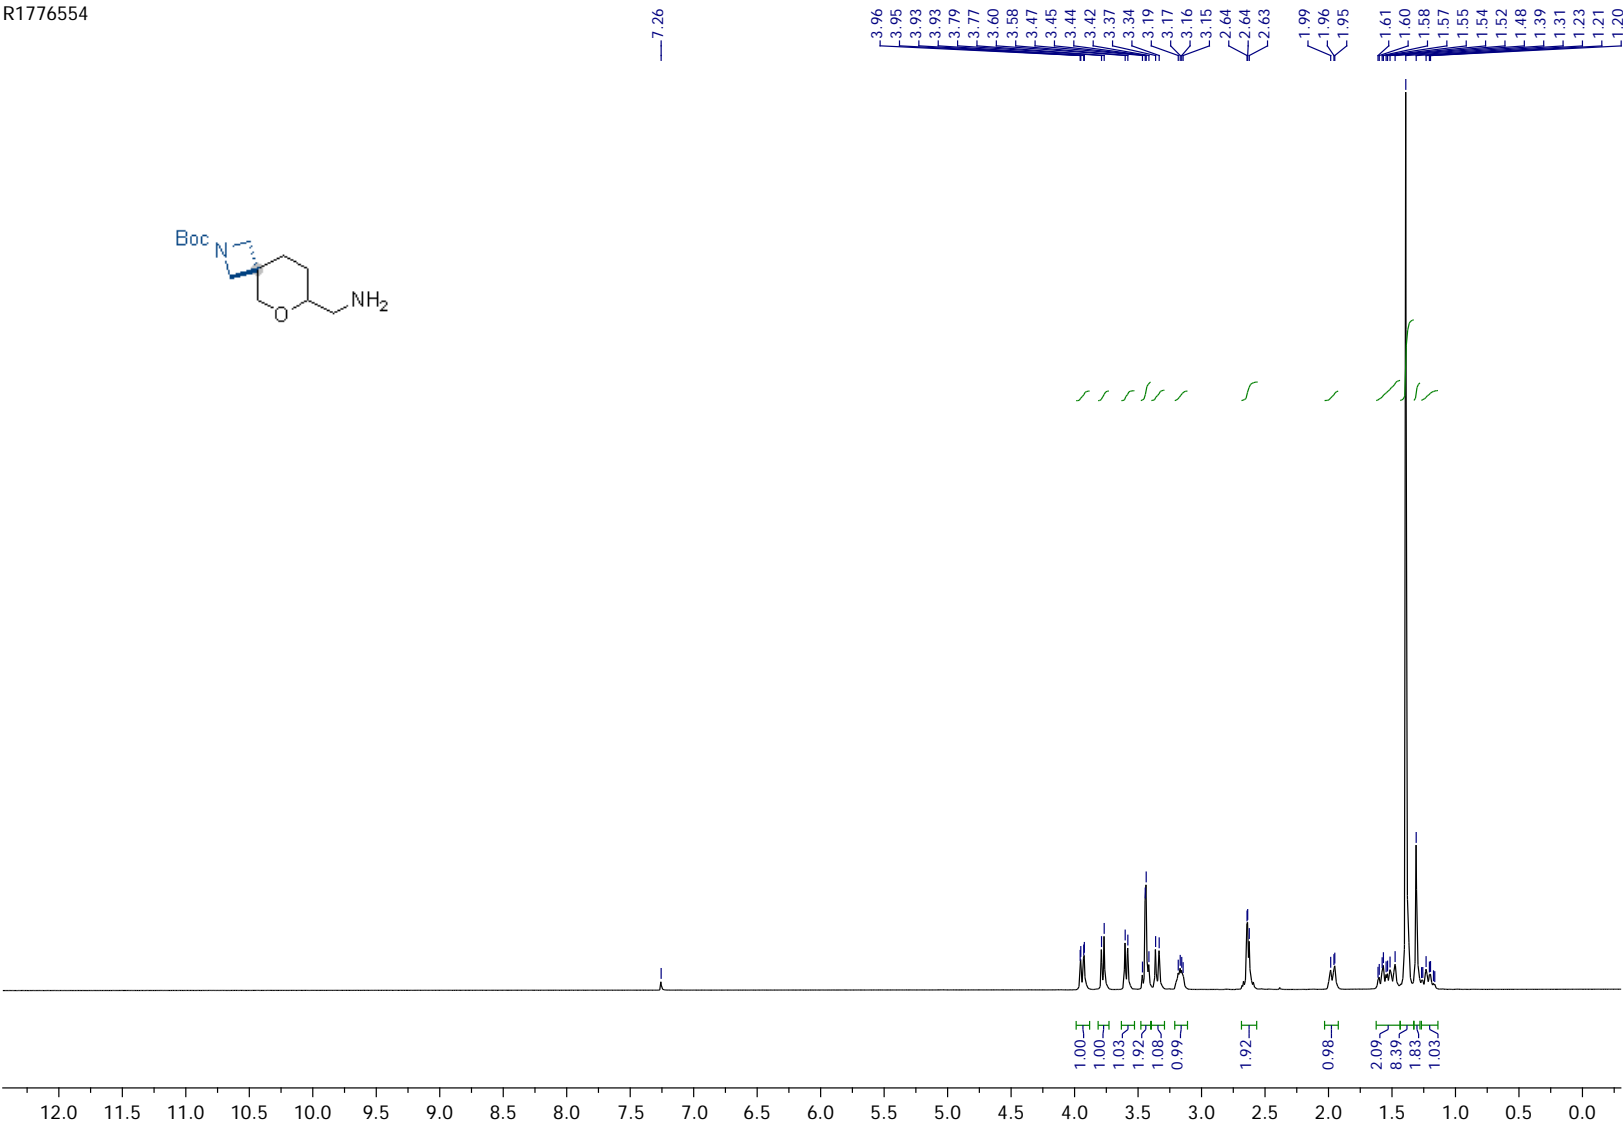

R1776554\_C13

|||||

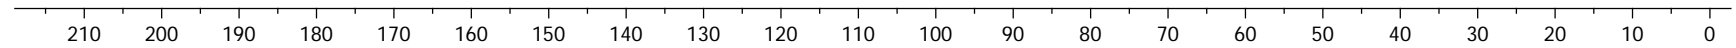

Compound 36b

R823421

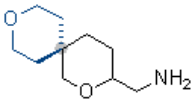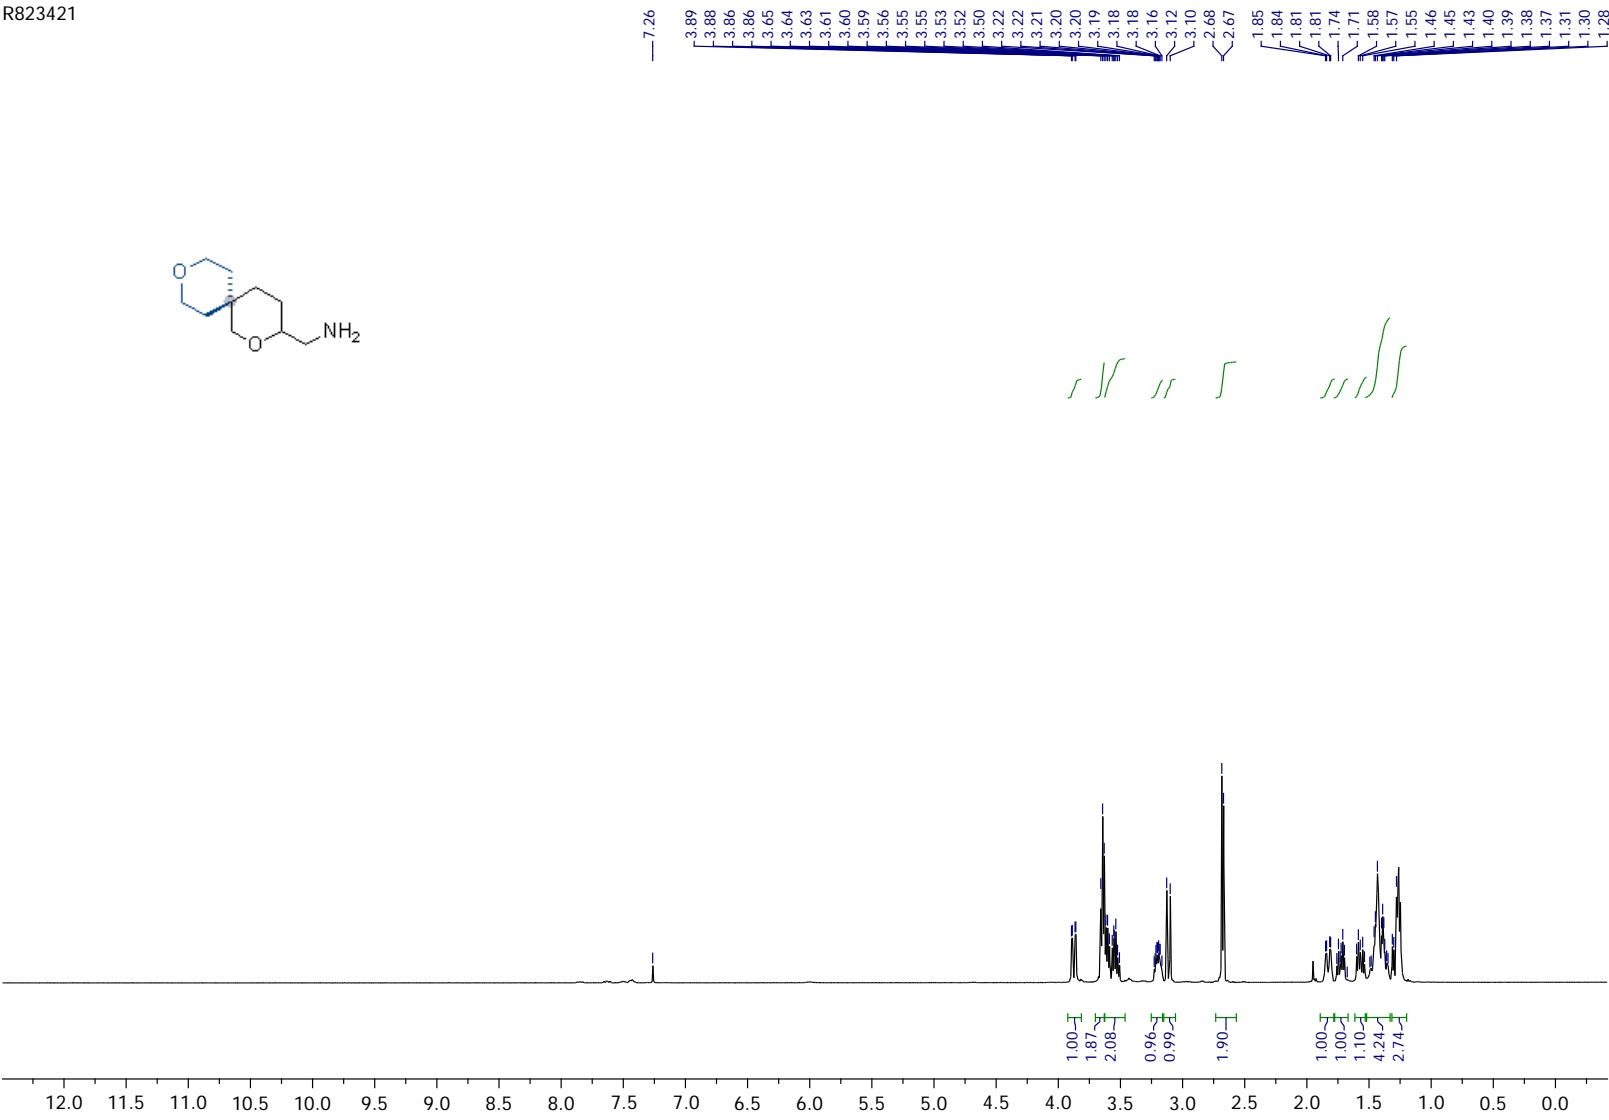



R823421\_C13

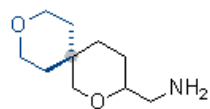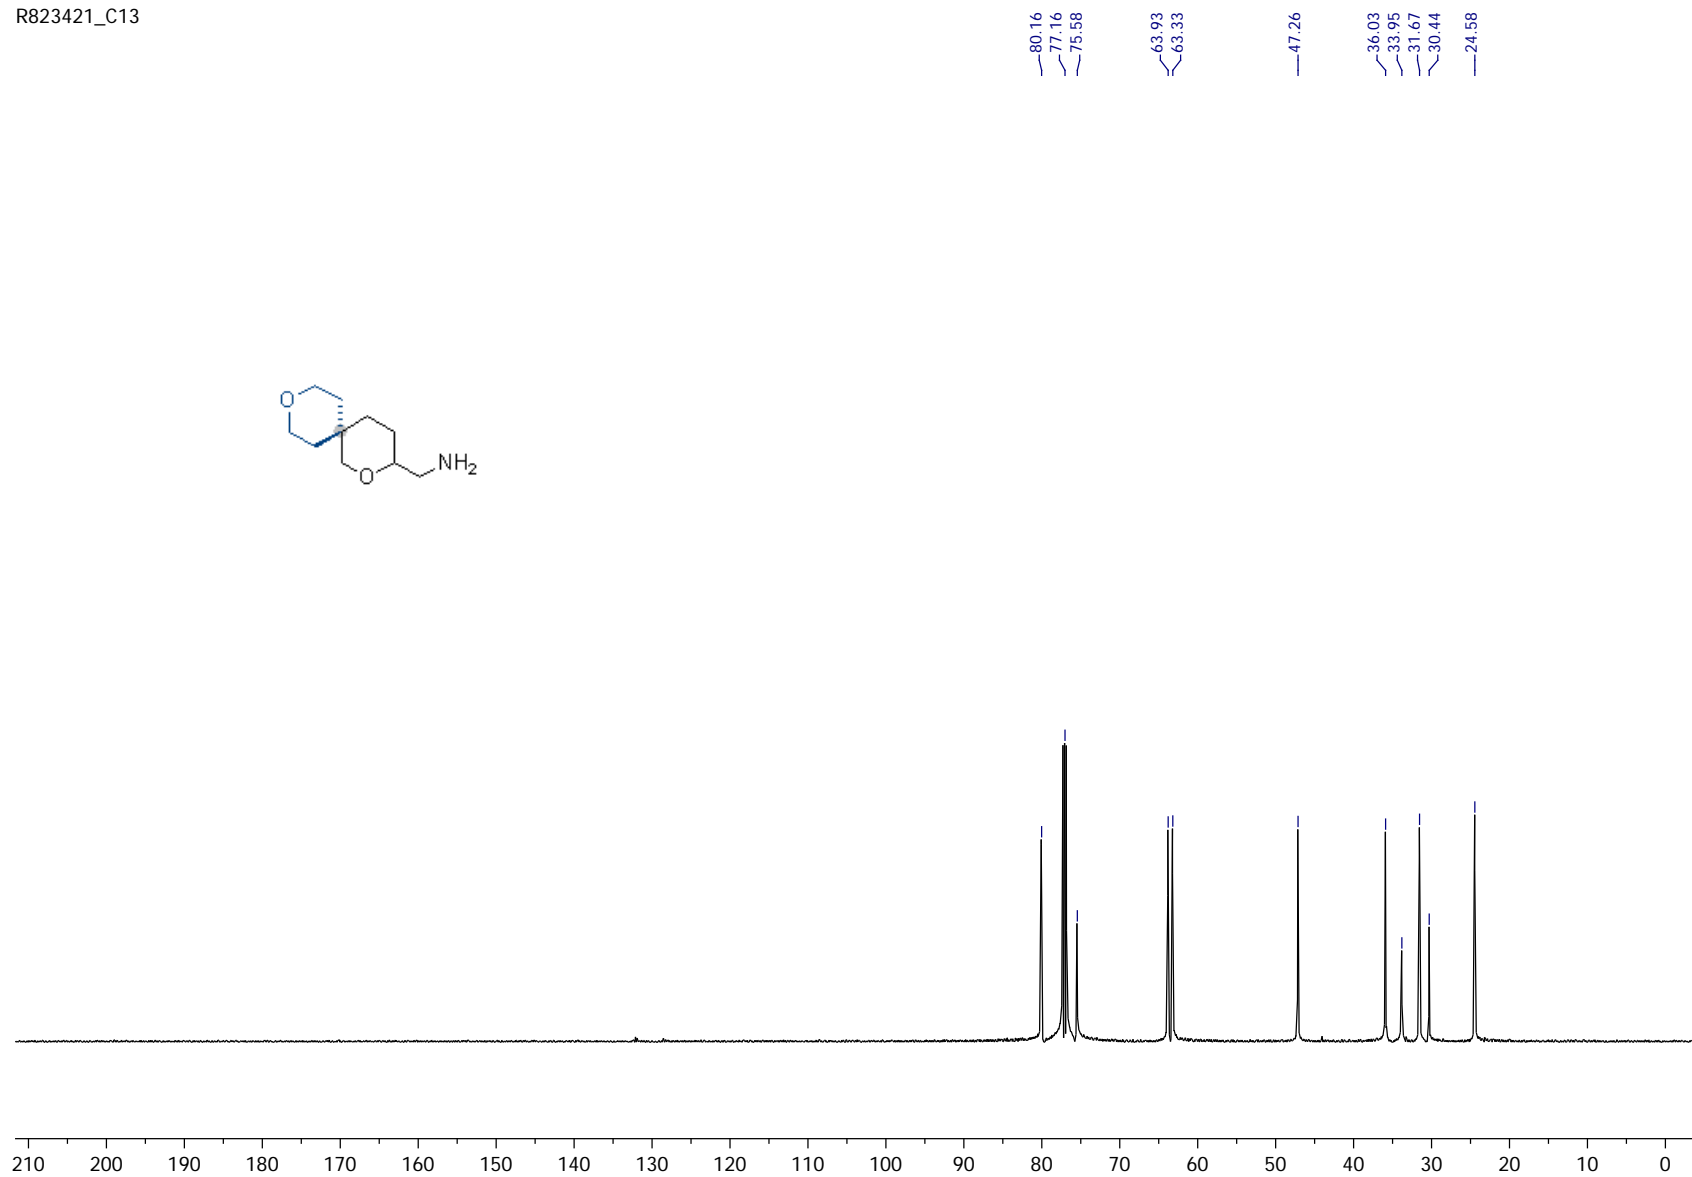

### Compound 37b

R1228734

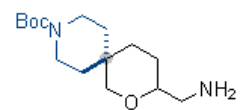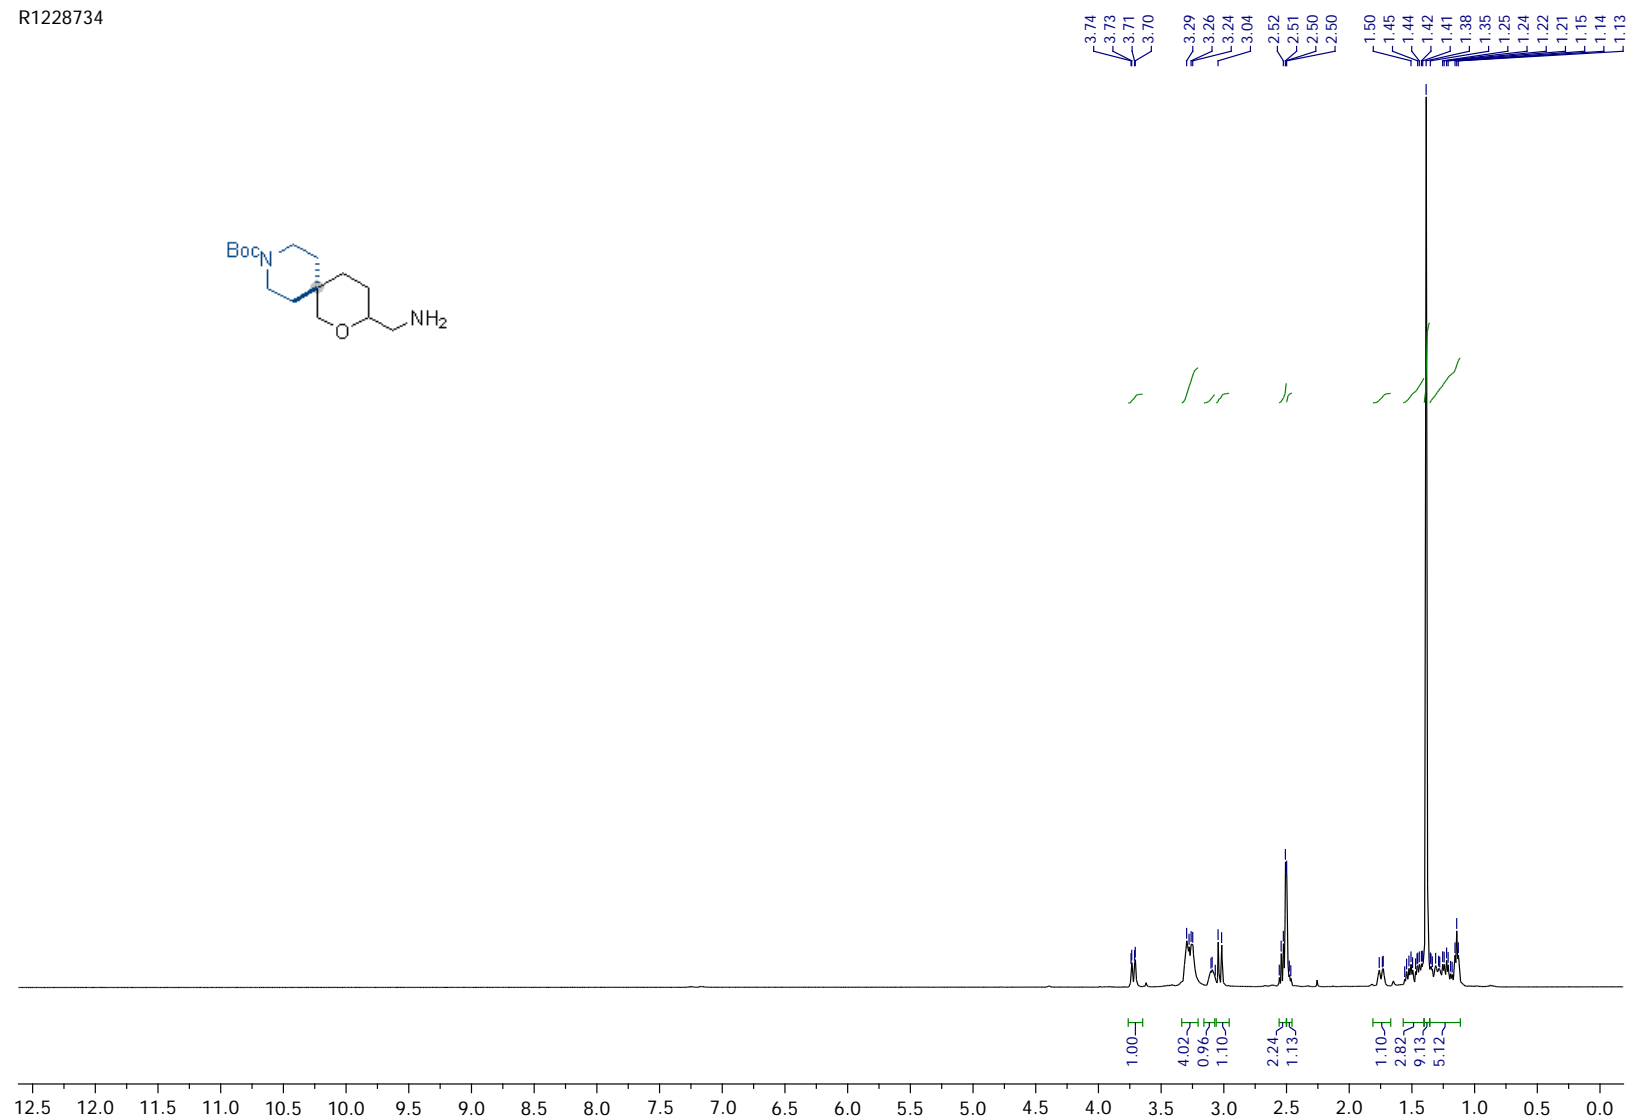

R1228734\_C13

\*\*\*\*\*

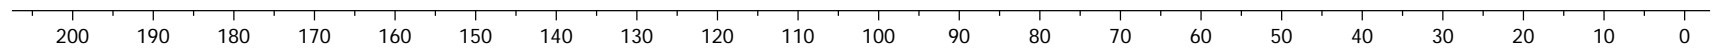

# Compound 38b

R879137

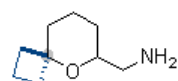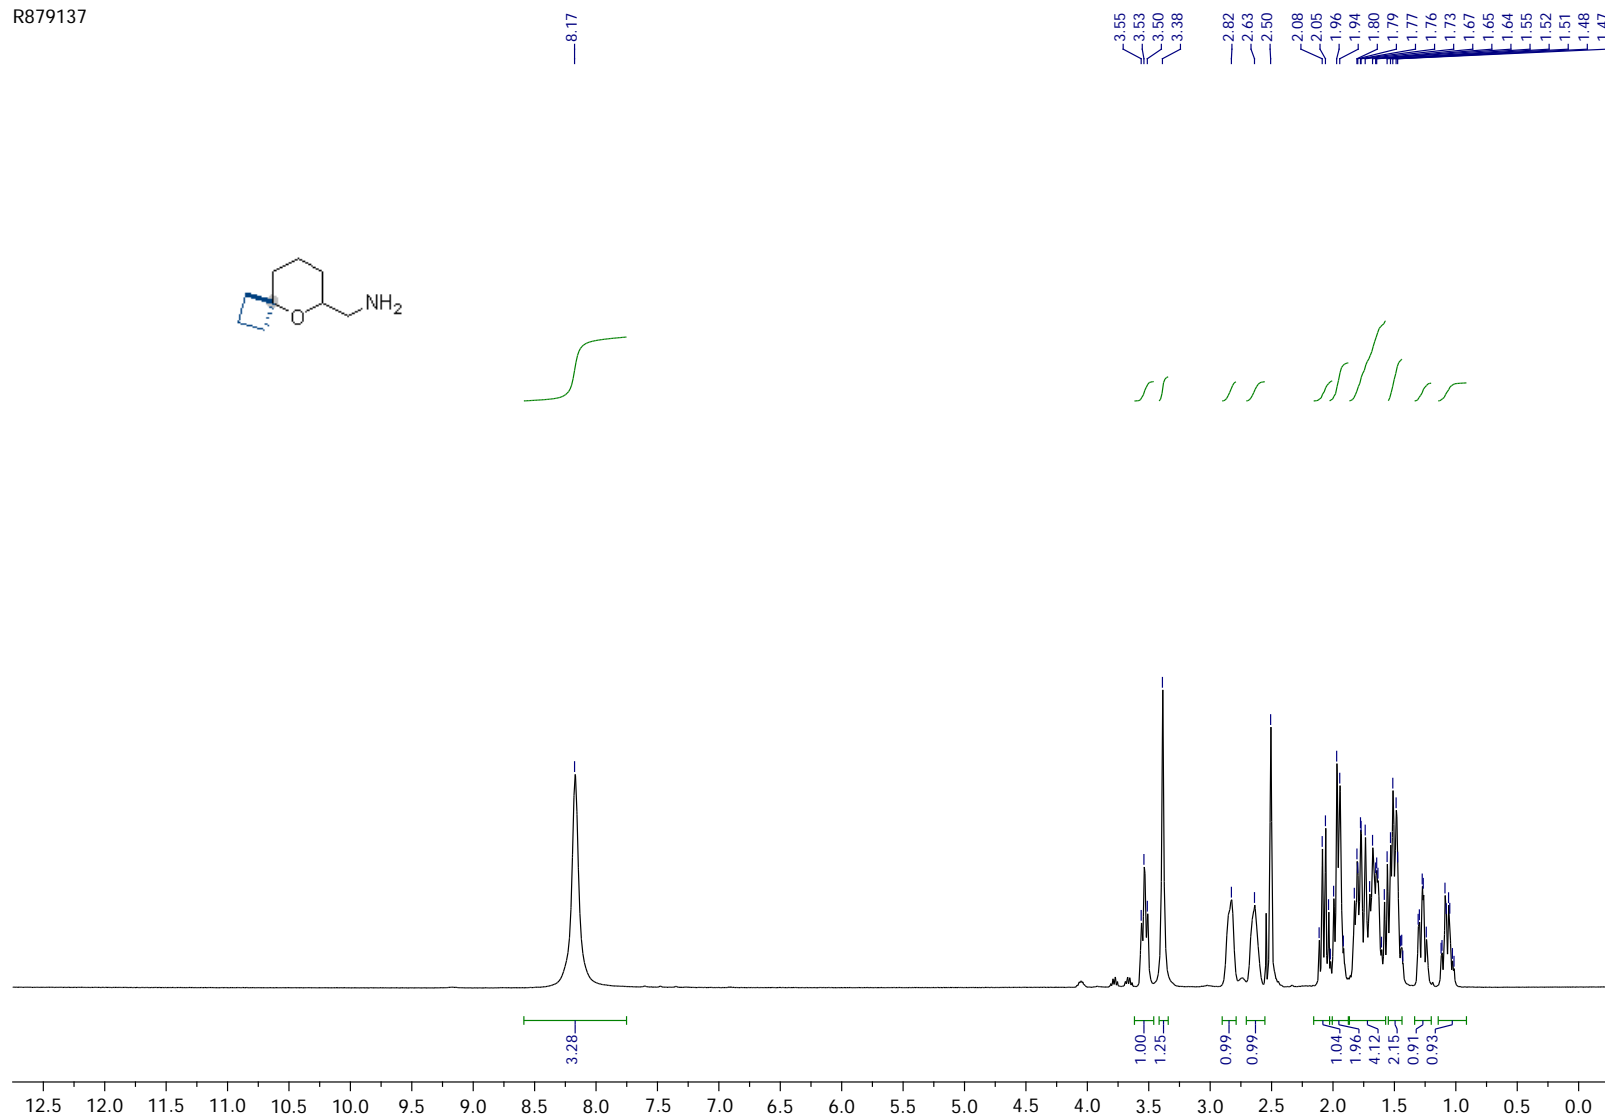

R879137\_C13

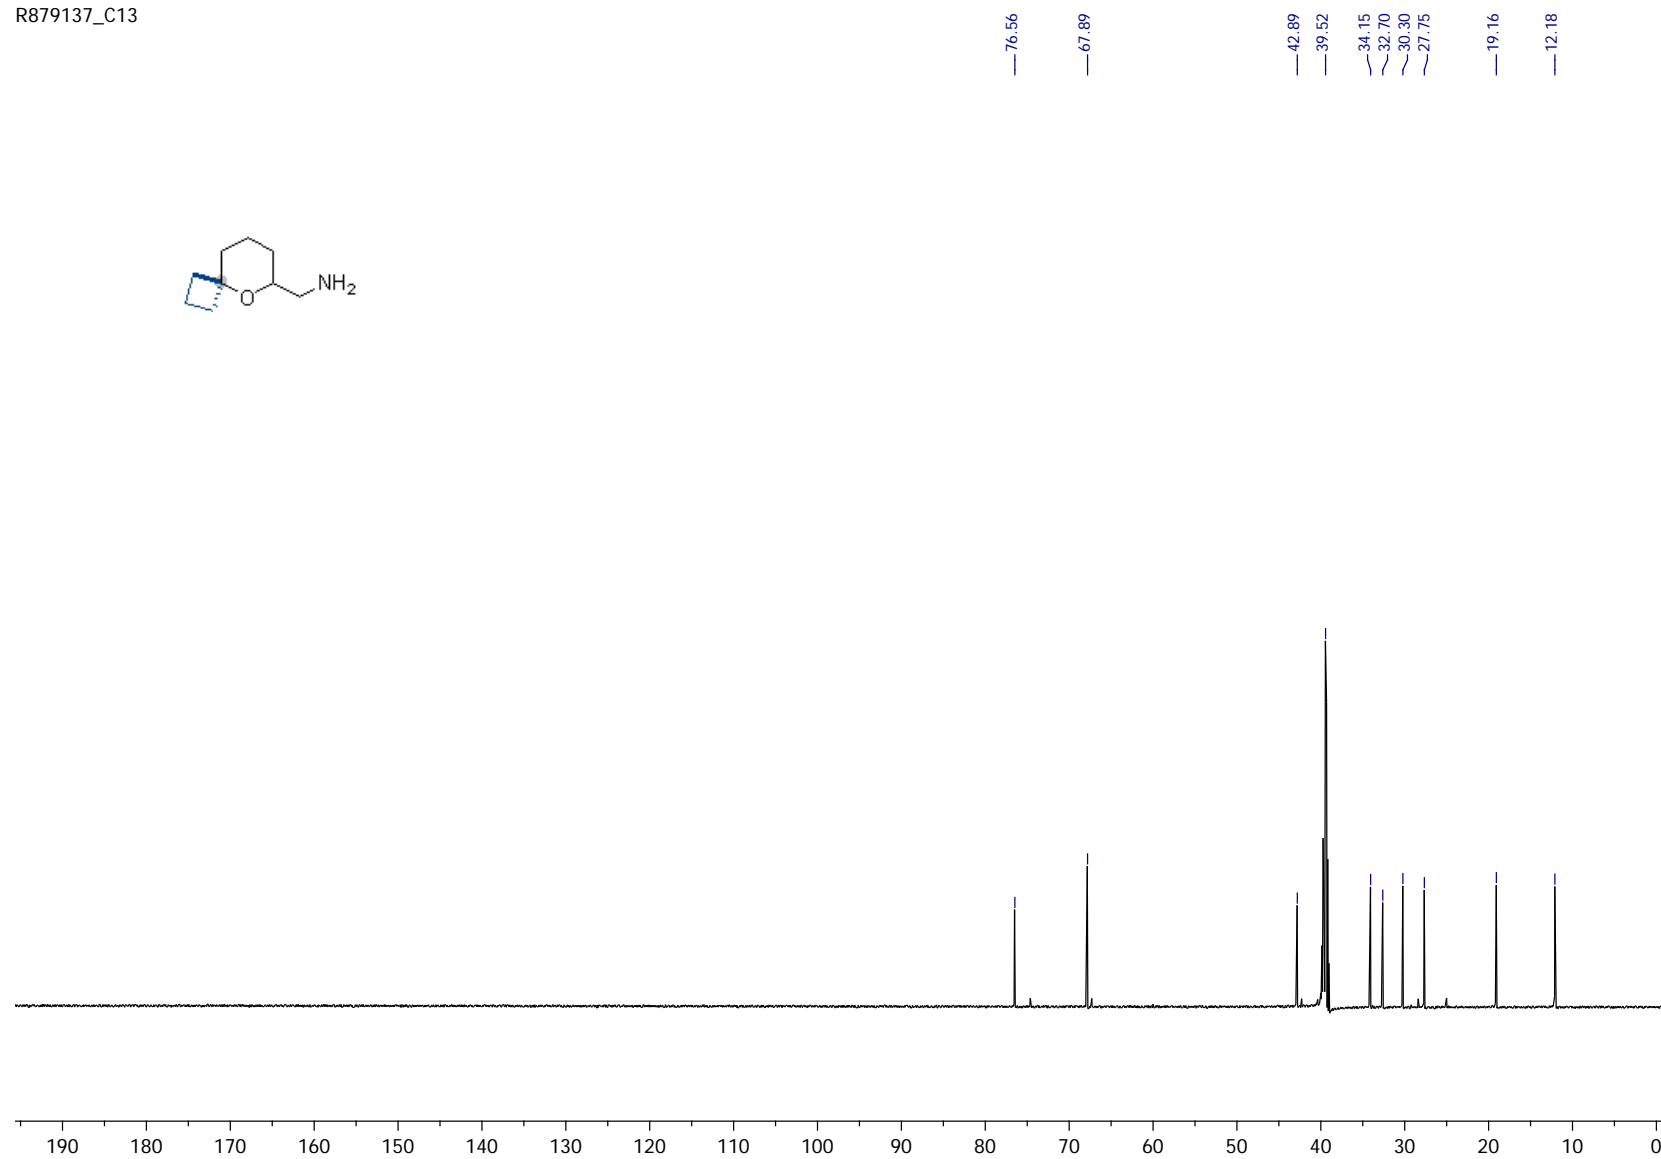

Compound 39b

R1878947

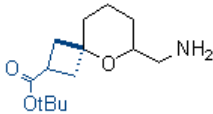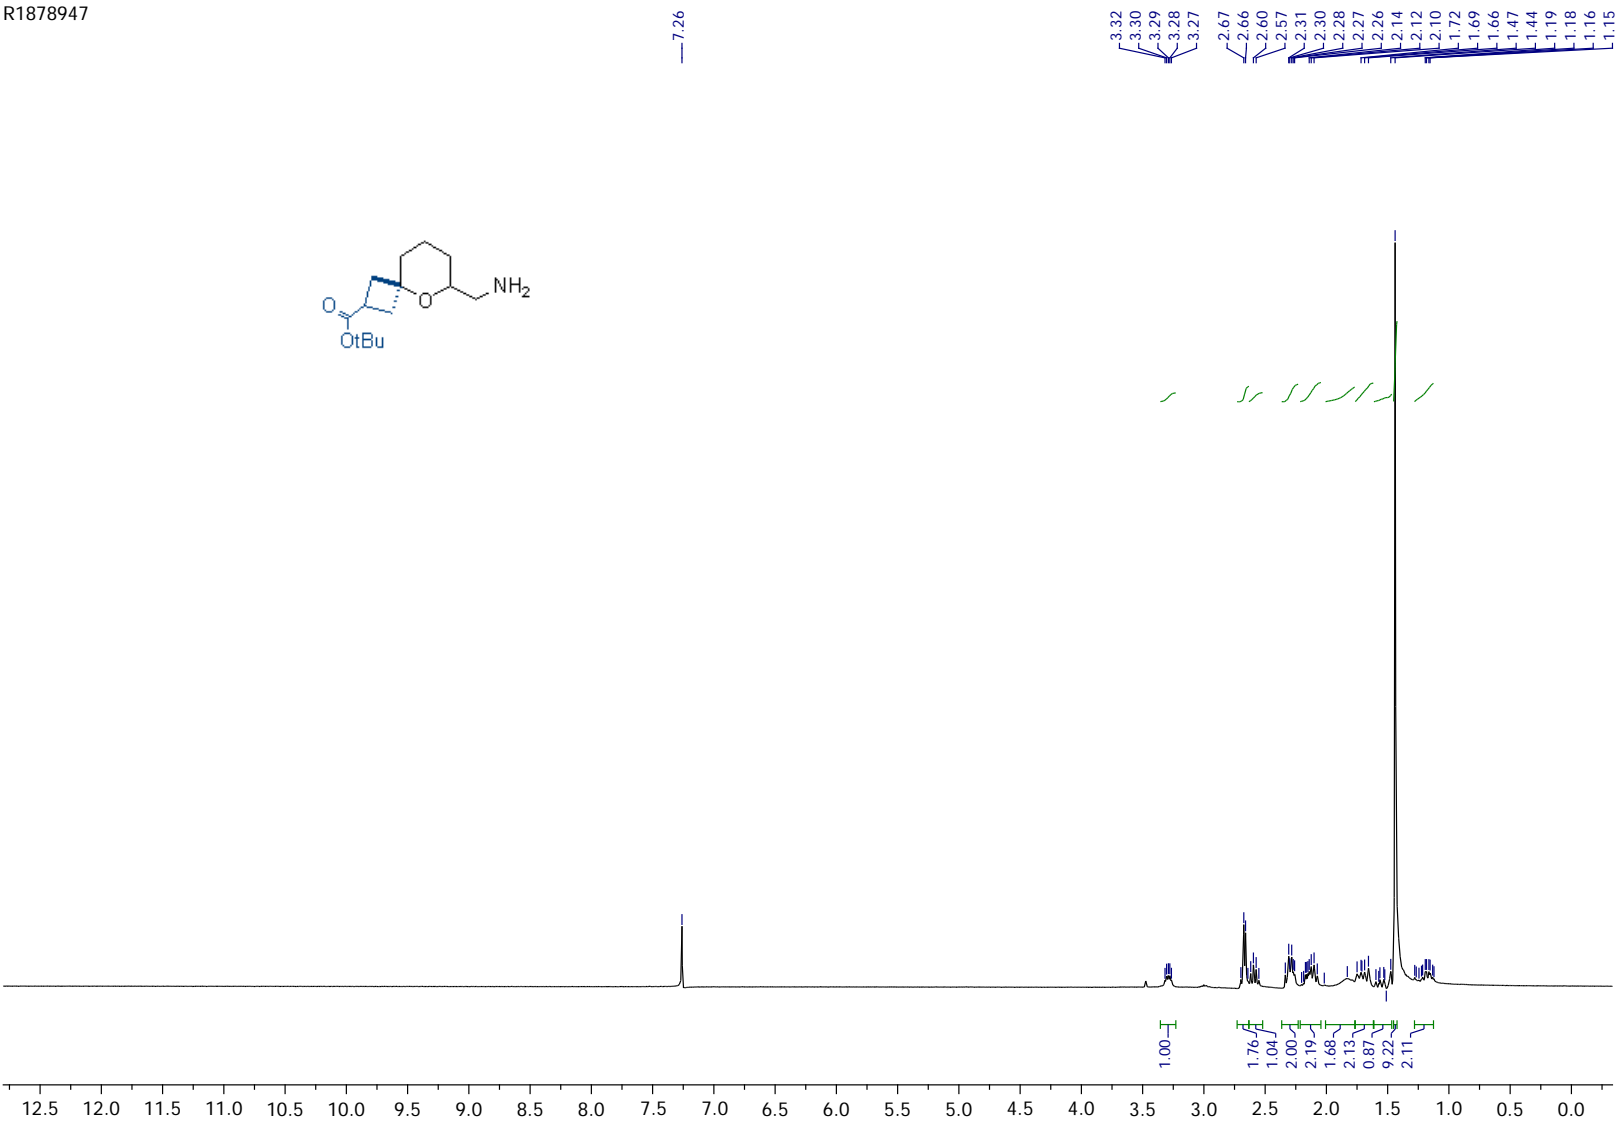

Compound 40b

R1578542

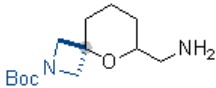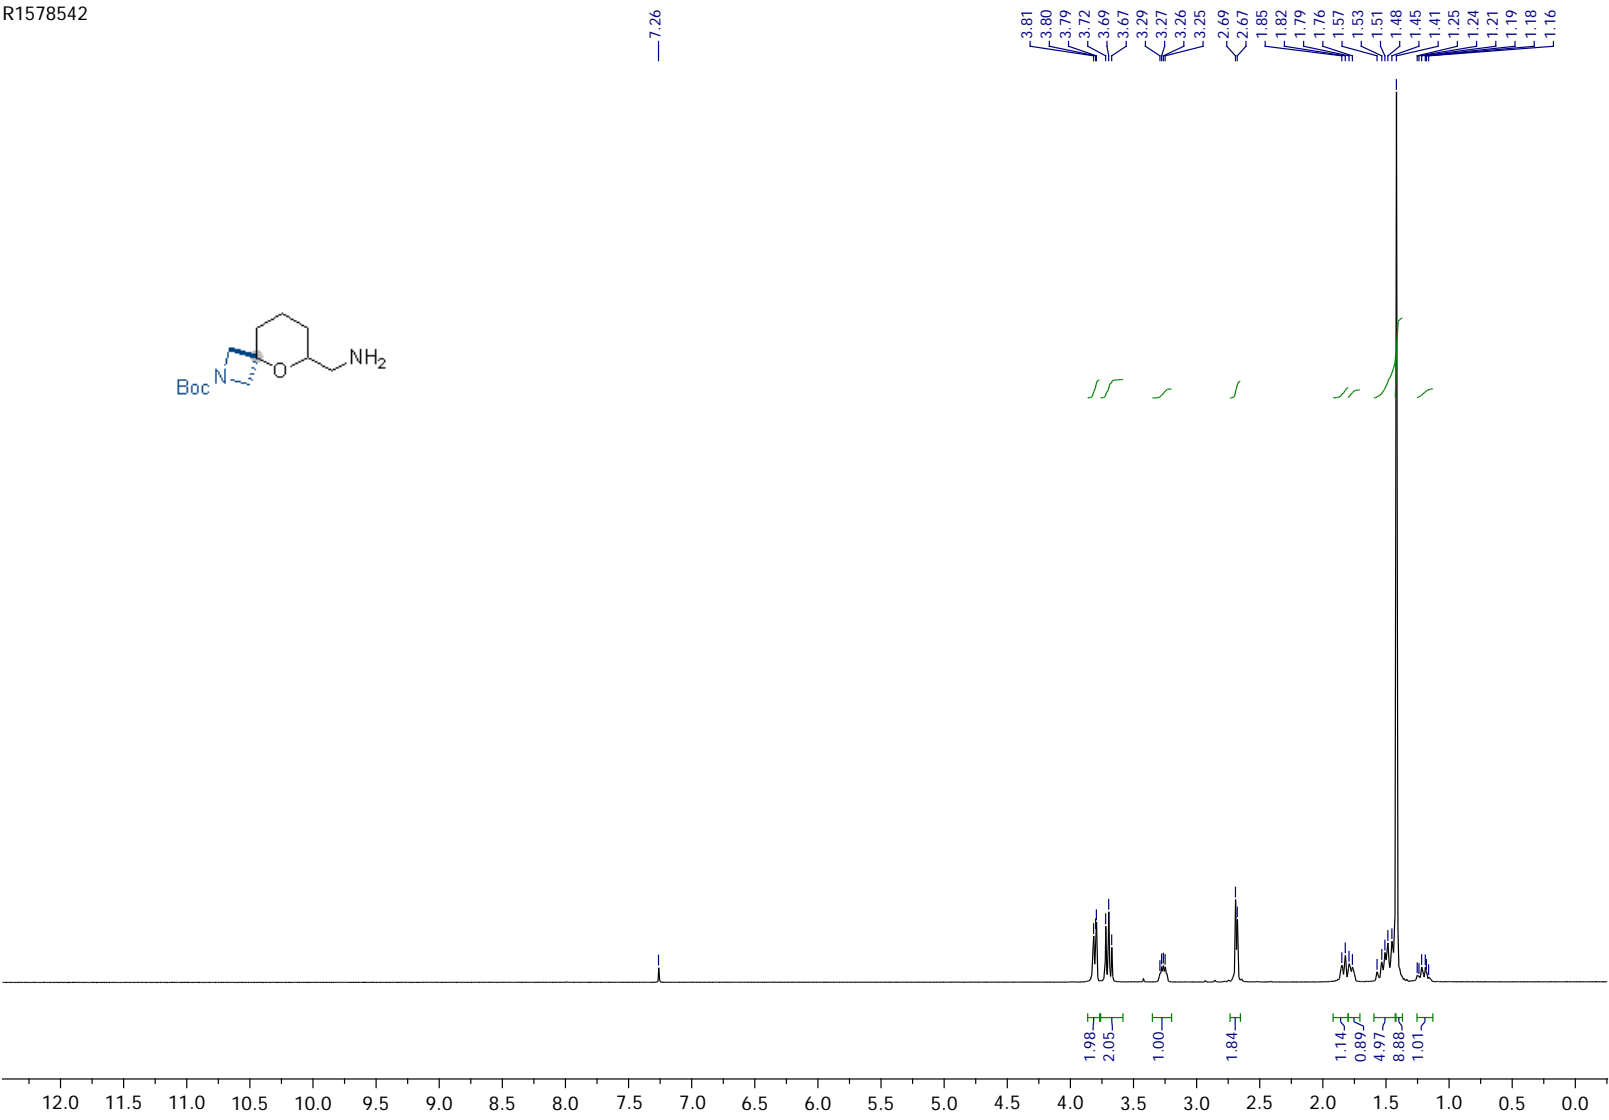

R1578542\_C13

#####

210 200 190 180 170 160 150 140 130 120 110 100 90 80 70 60 50 40 30 20 10 0



Compound 41b

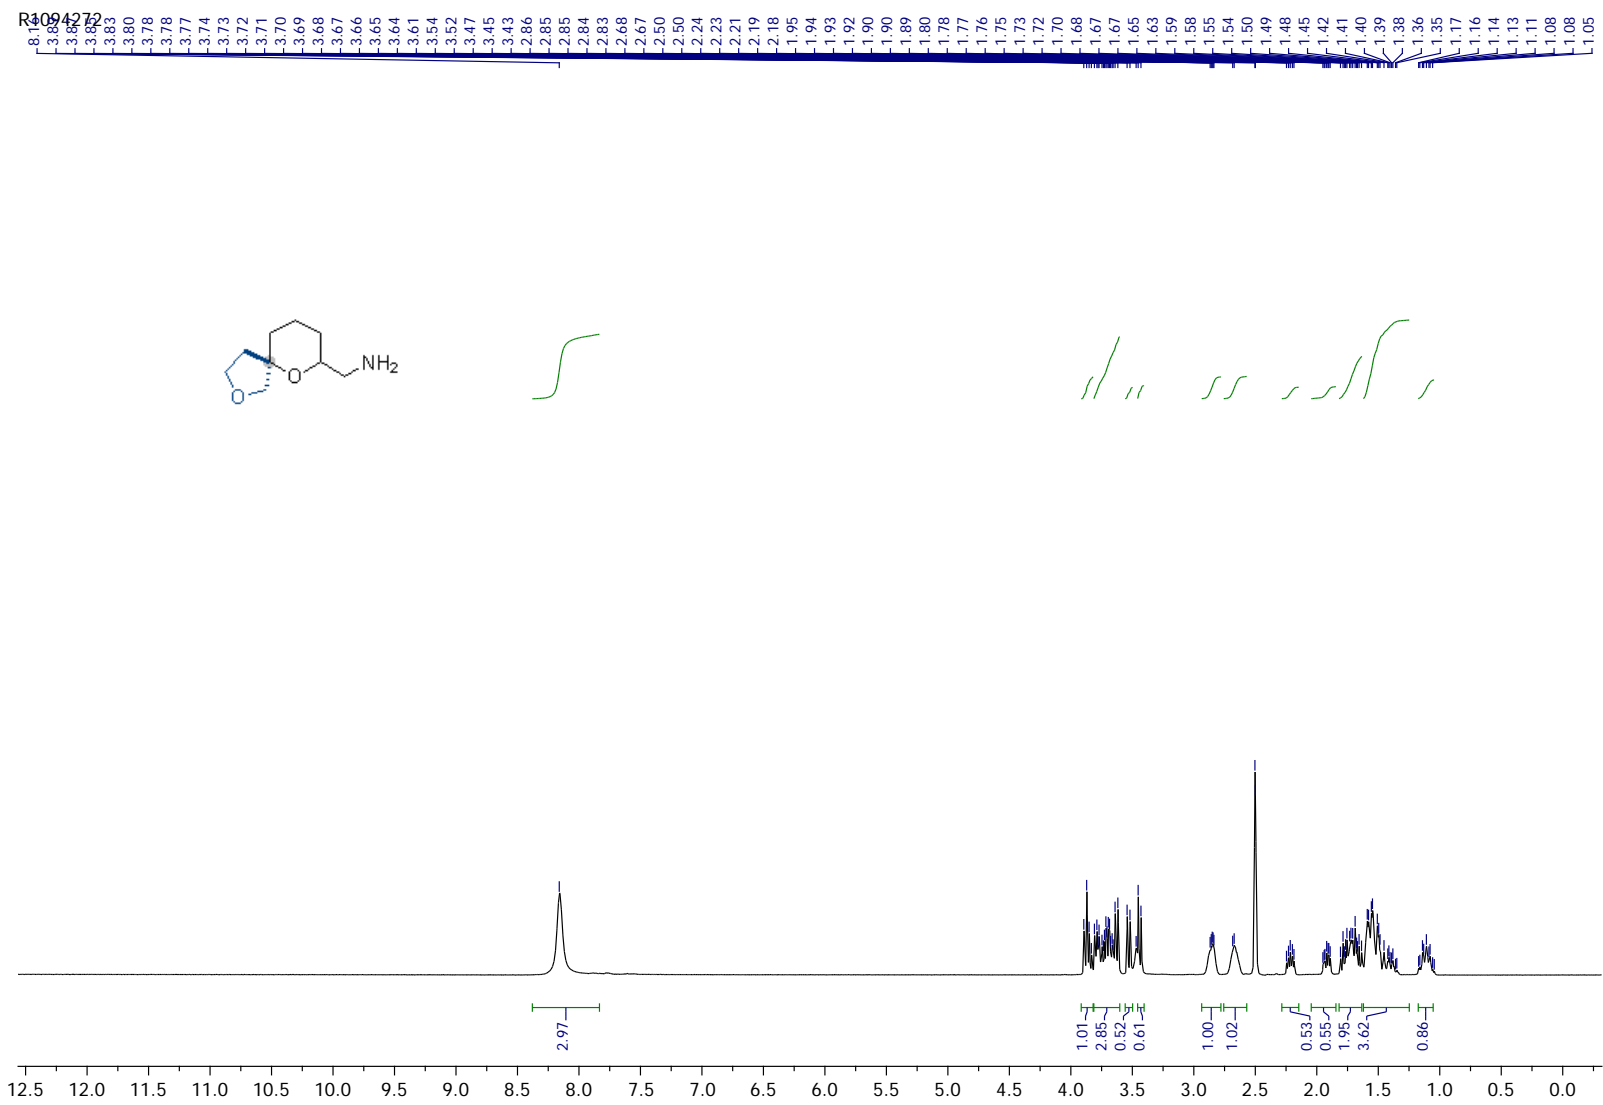

R1094272\_C13

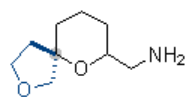

83.05  
82.82  
78.71  
72.50  
69.02  
68.61  
67.43  
65.88  
43.16  
43.06  
40.83  
39.52  
33.12  
32.64  
31.50  
27.79  
27.72  
20.44  
20.14

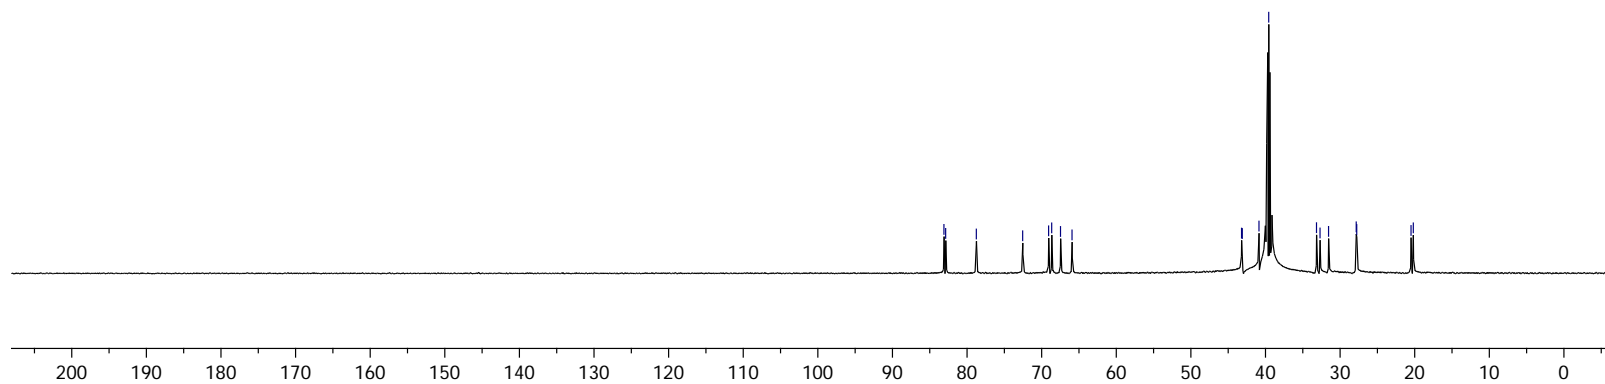

Compound 42b

R1623115

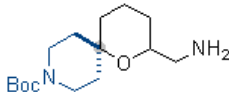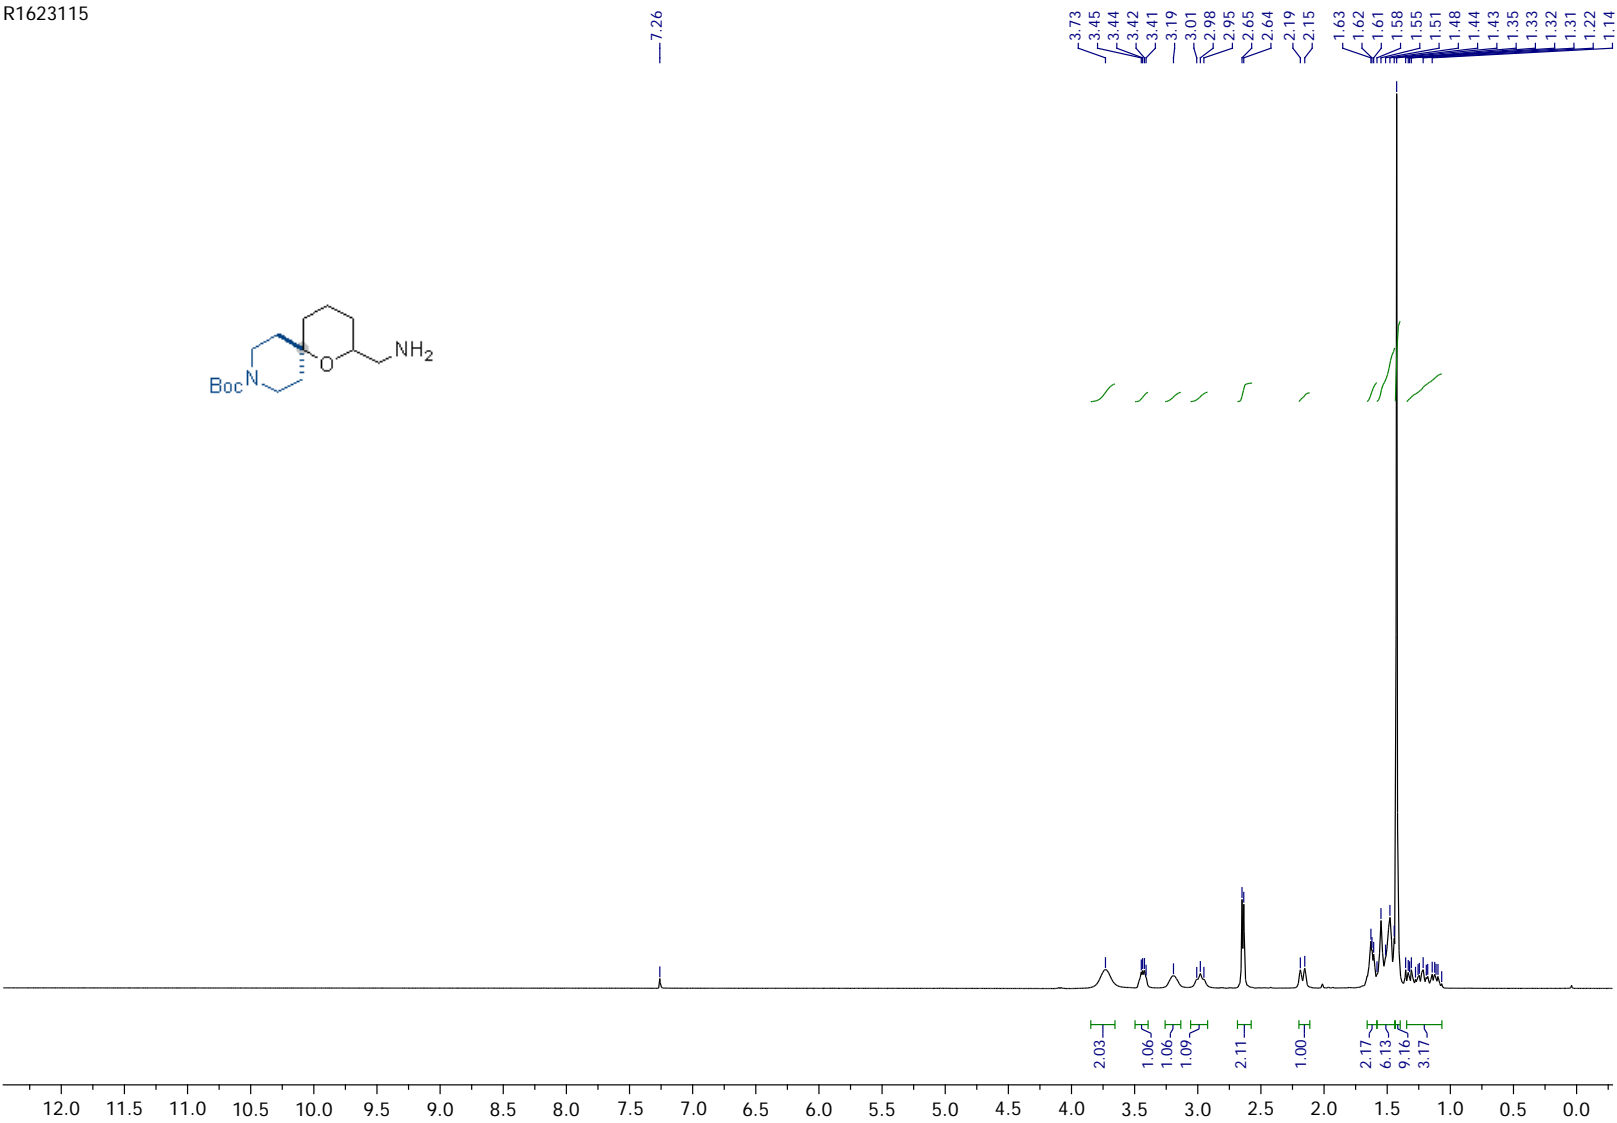

R1623115\_C13

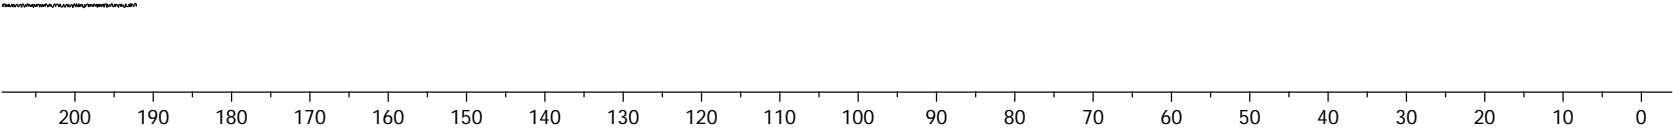

# Compound 43b

R1240864

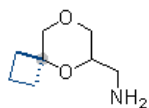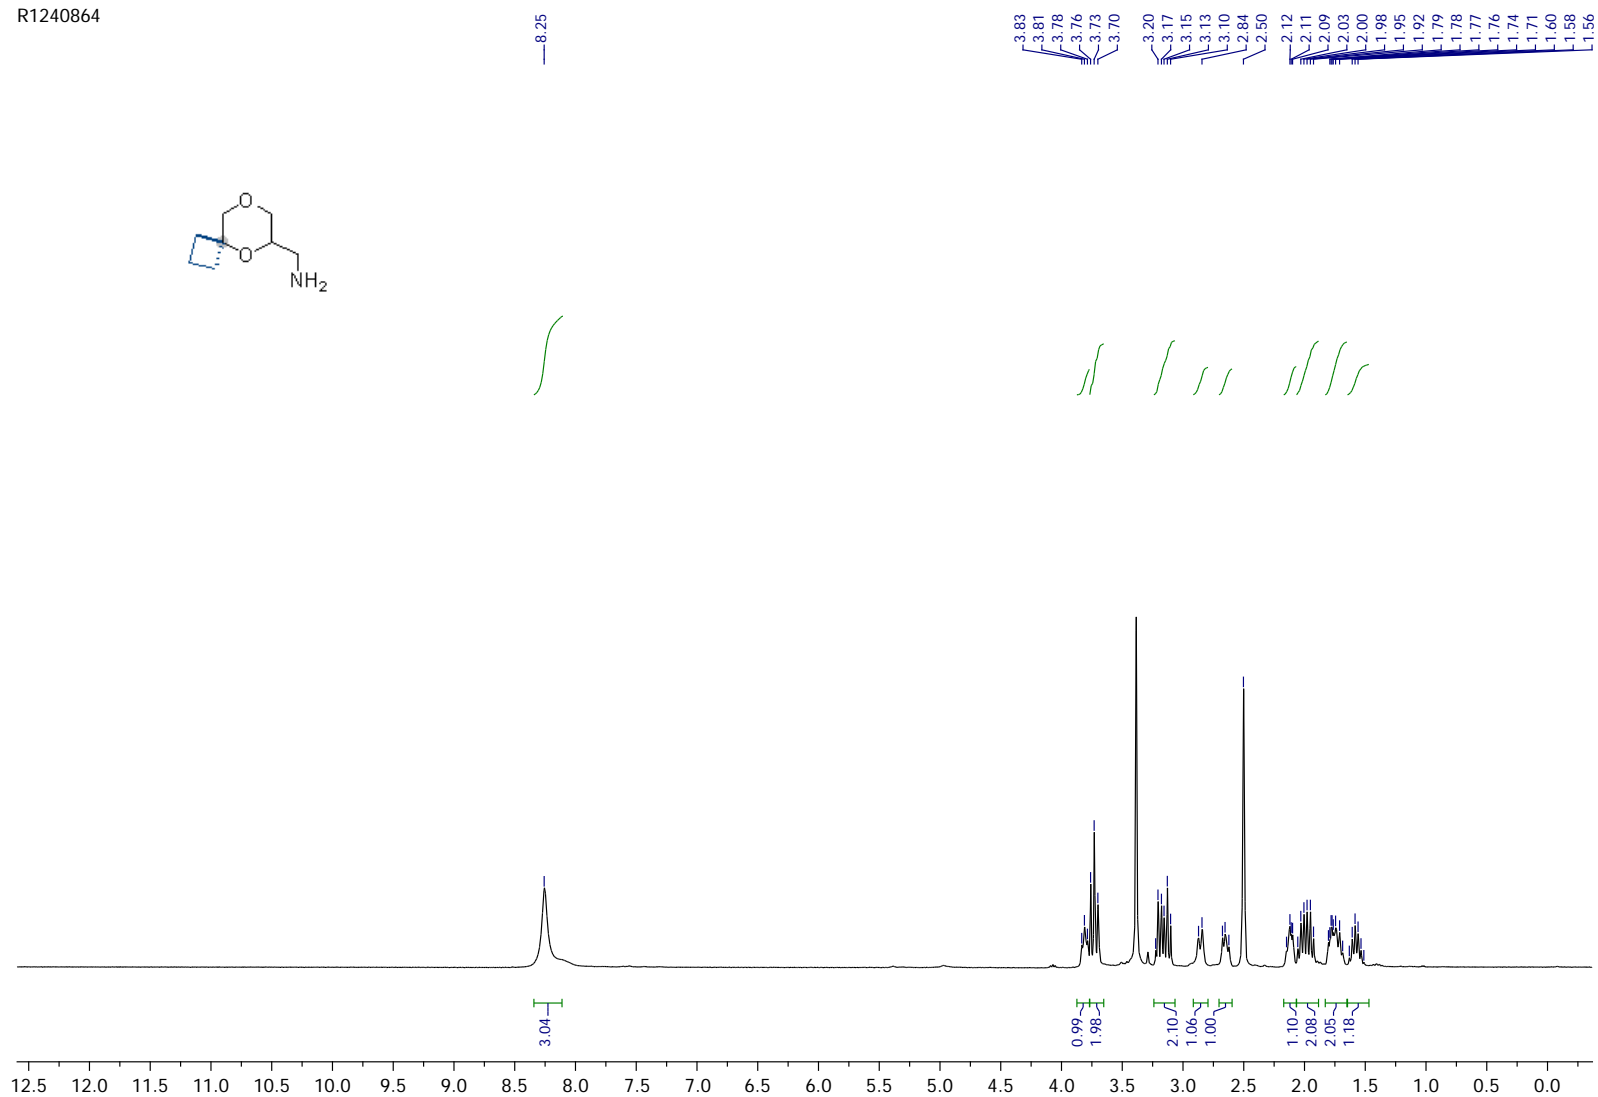

R1240864\_C13

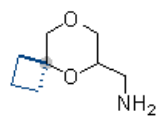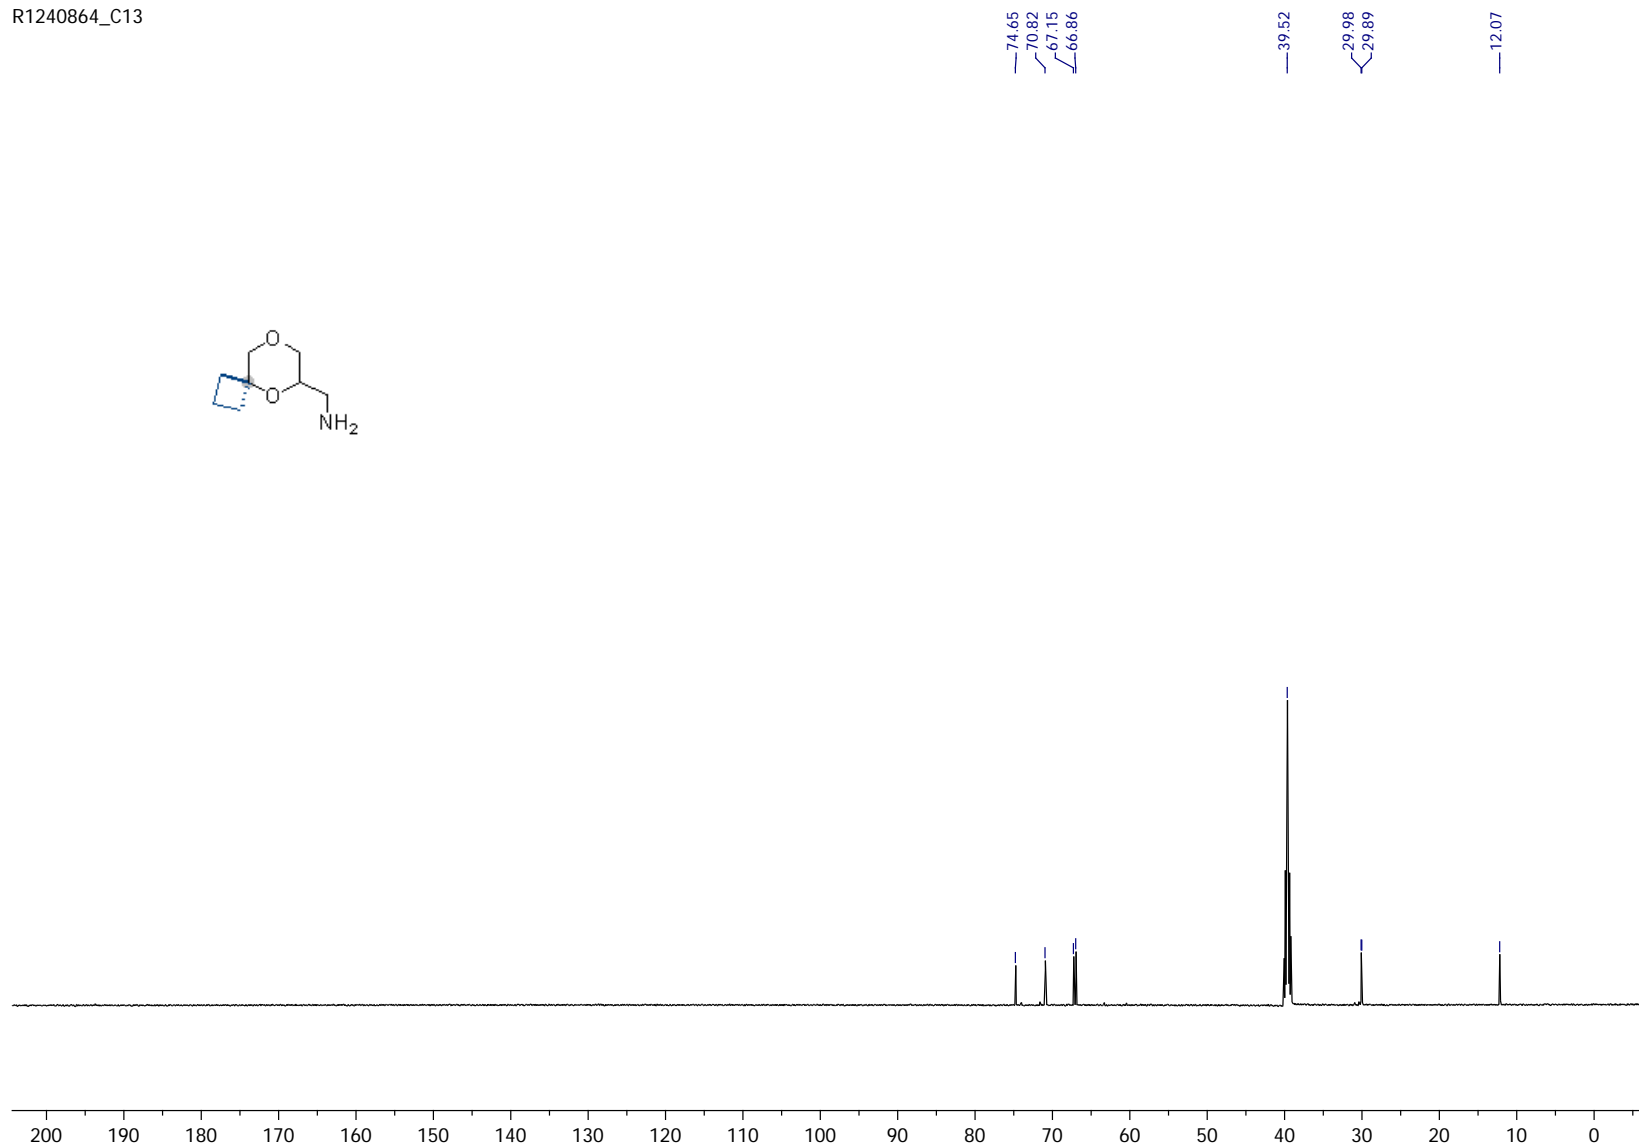

Compound 44b

R1662039

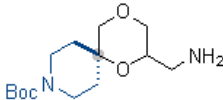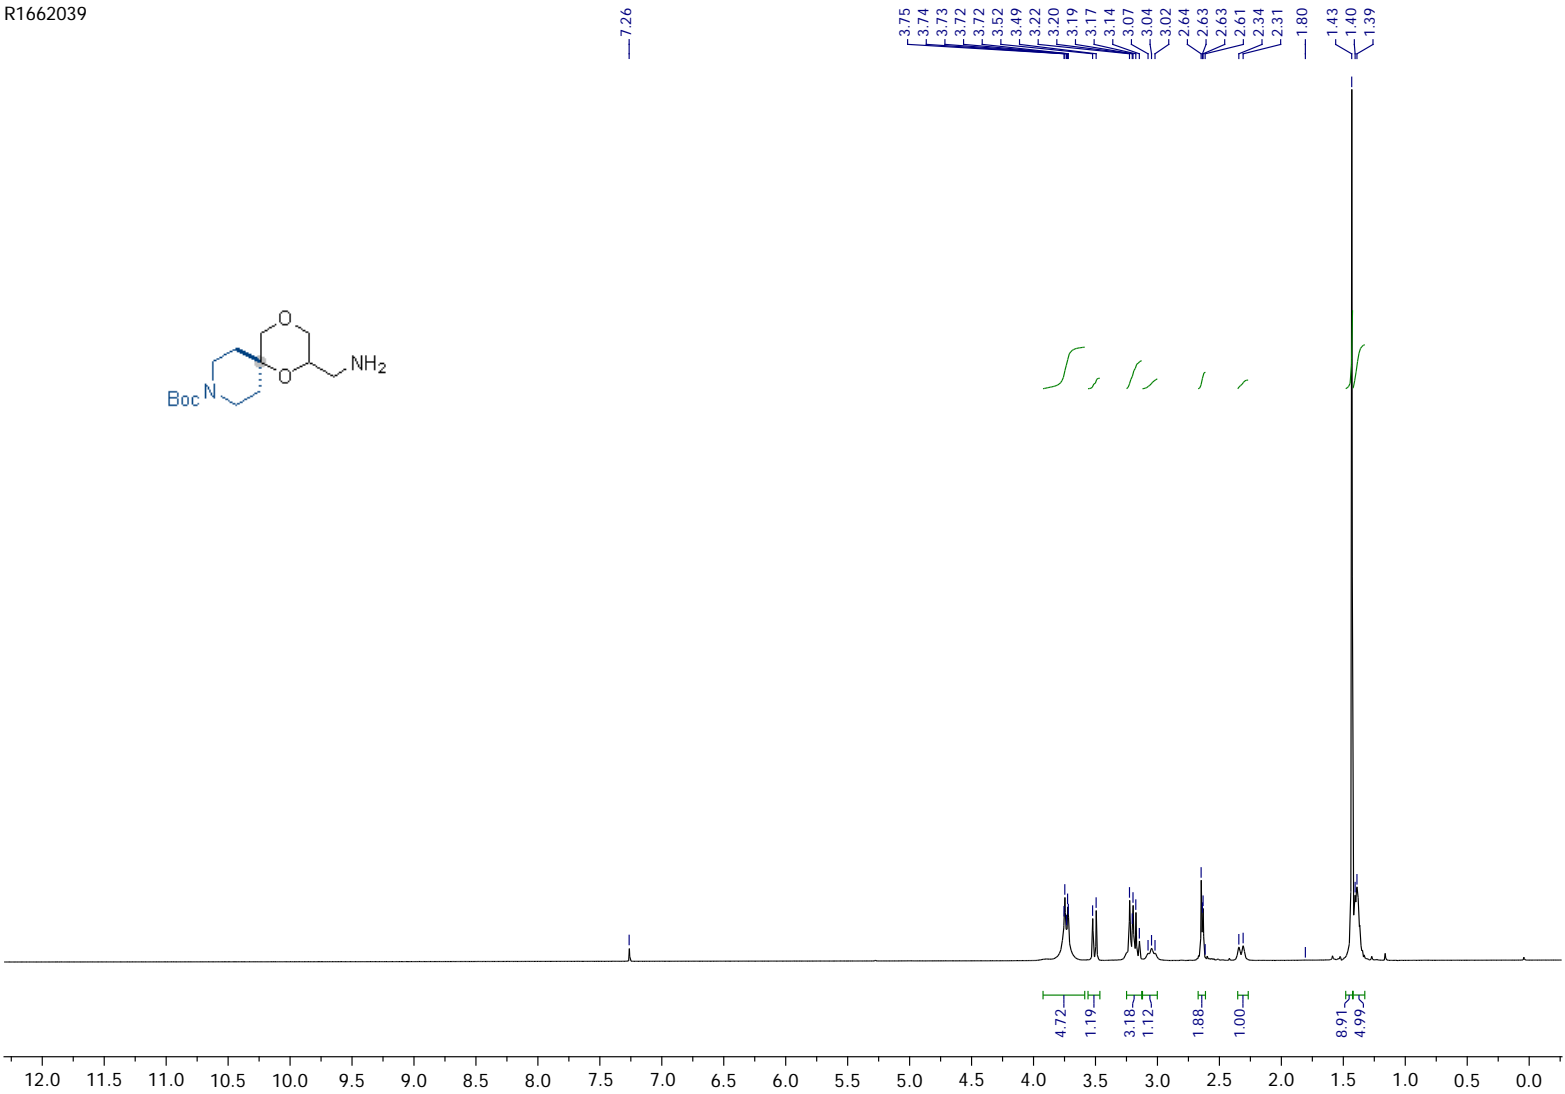





Compound 5c

R1418139

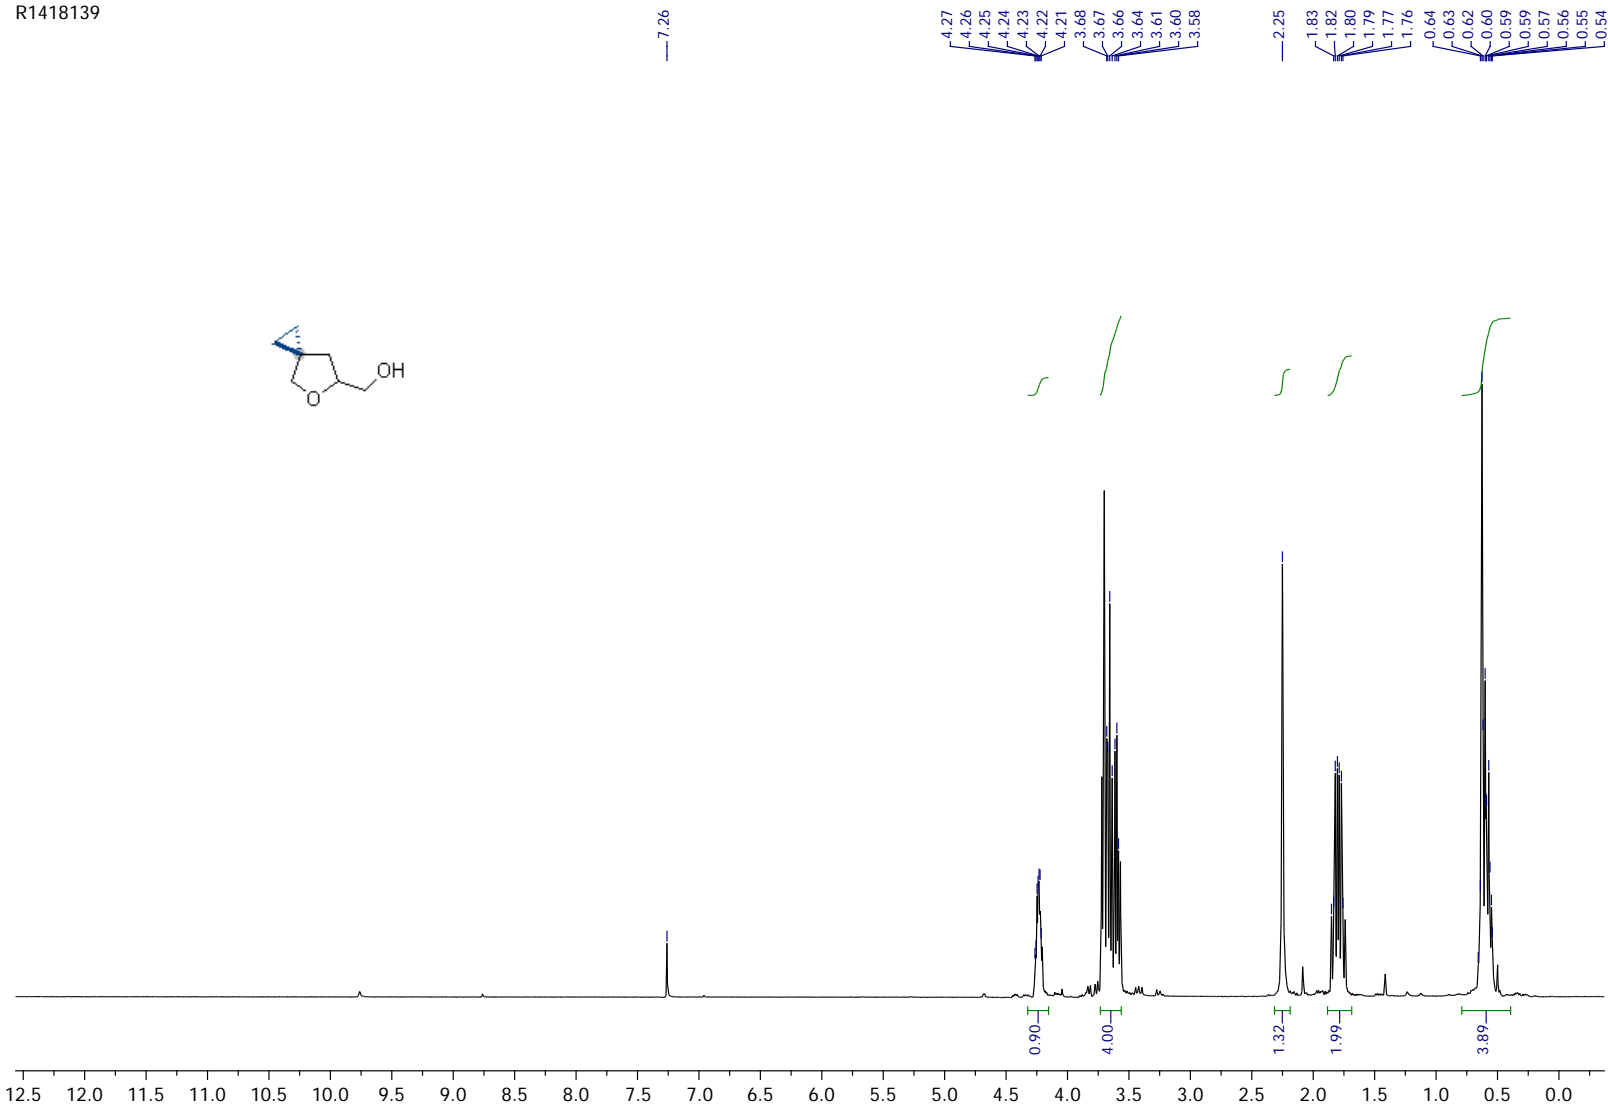

R1418139\_C13

|||||

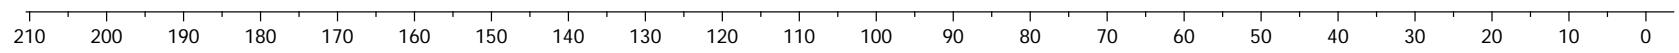

Compound 6c

R1413927

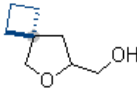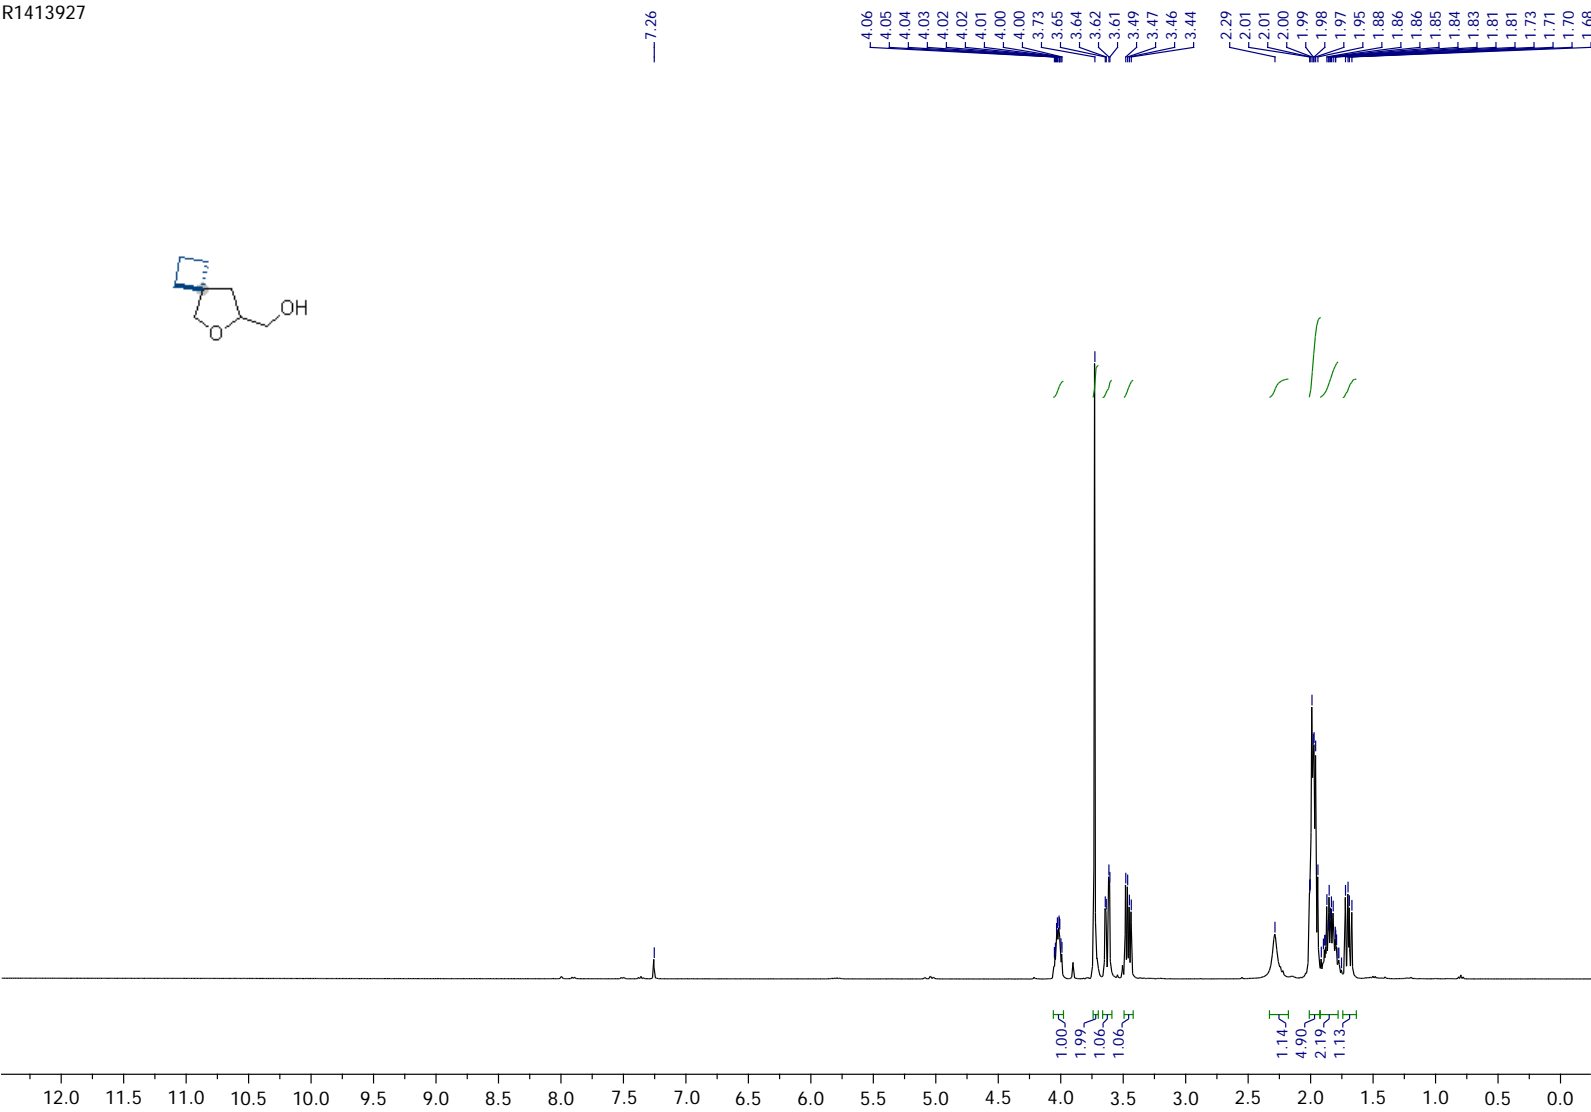

R1413927\_C13

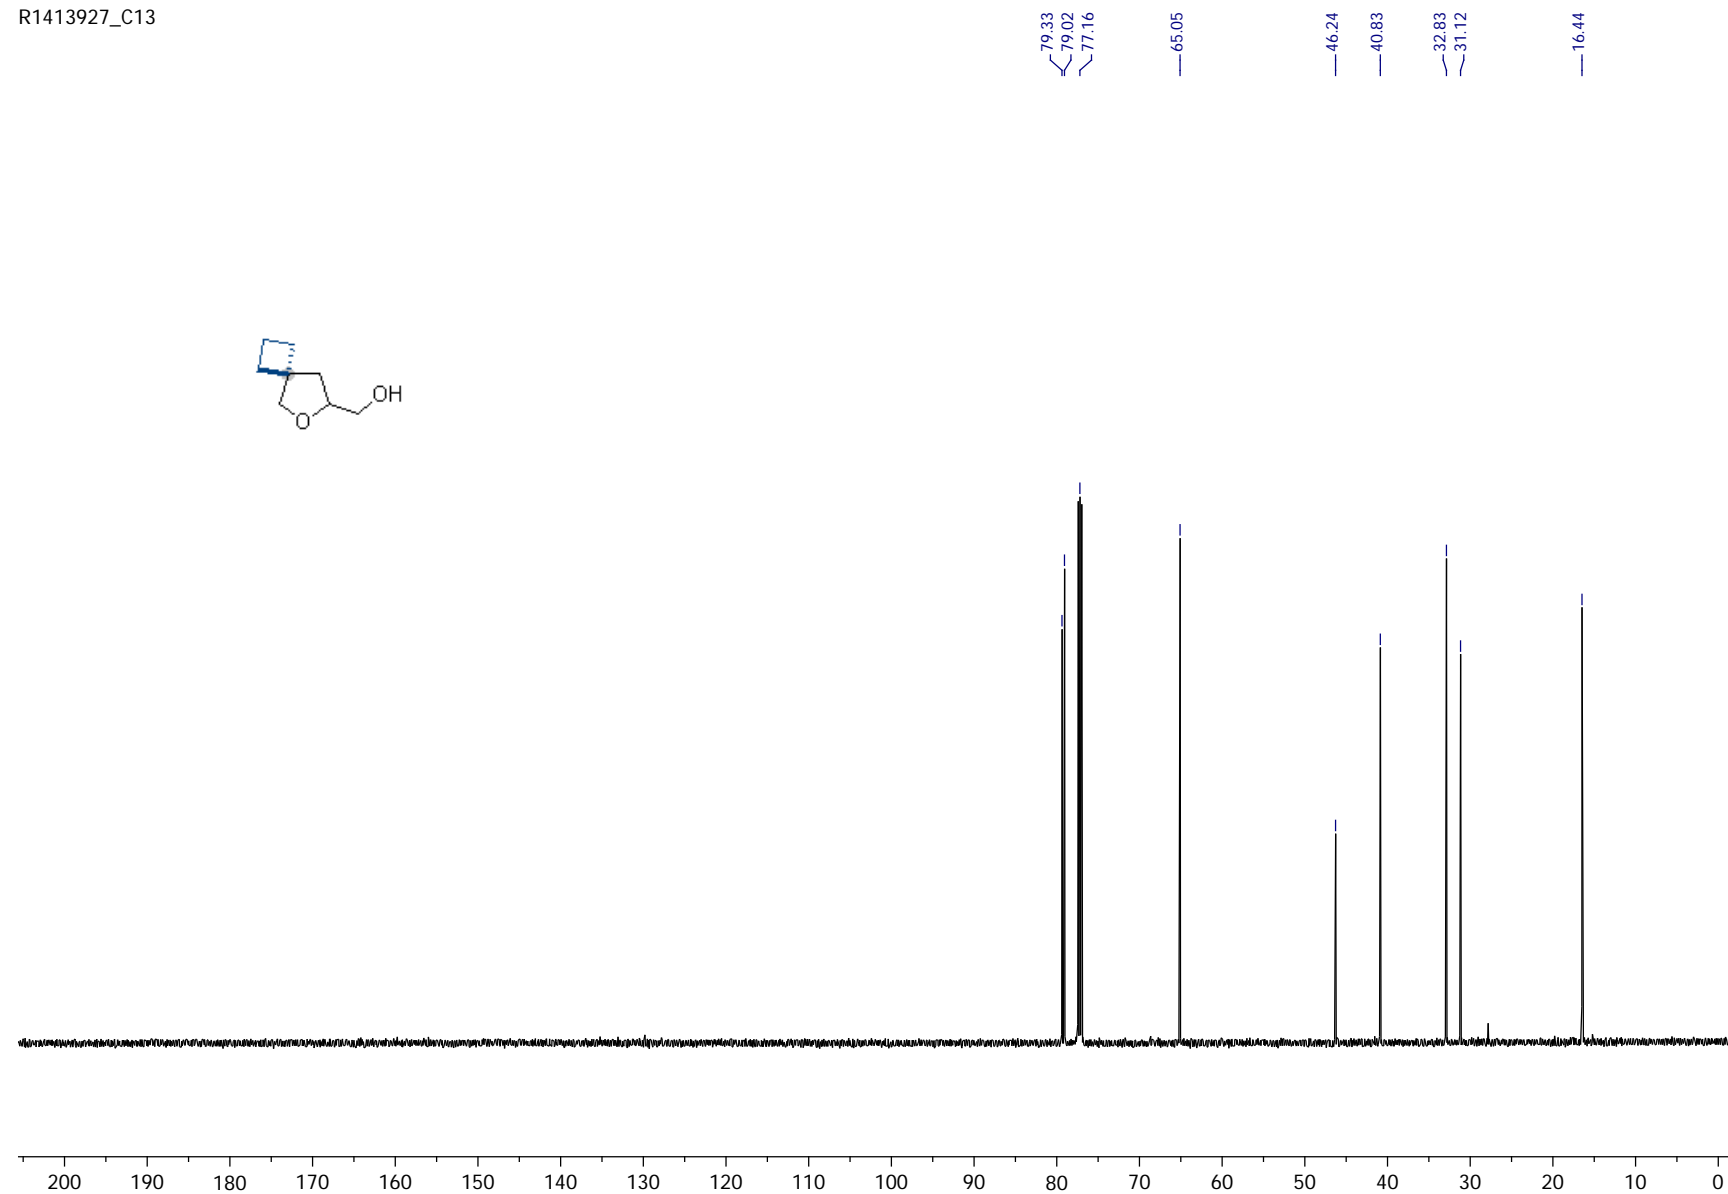

Compound 7c

R1376548

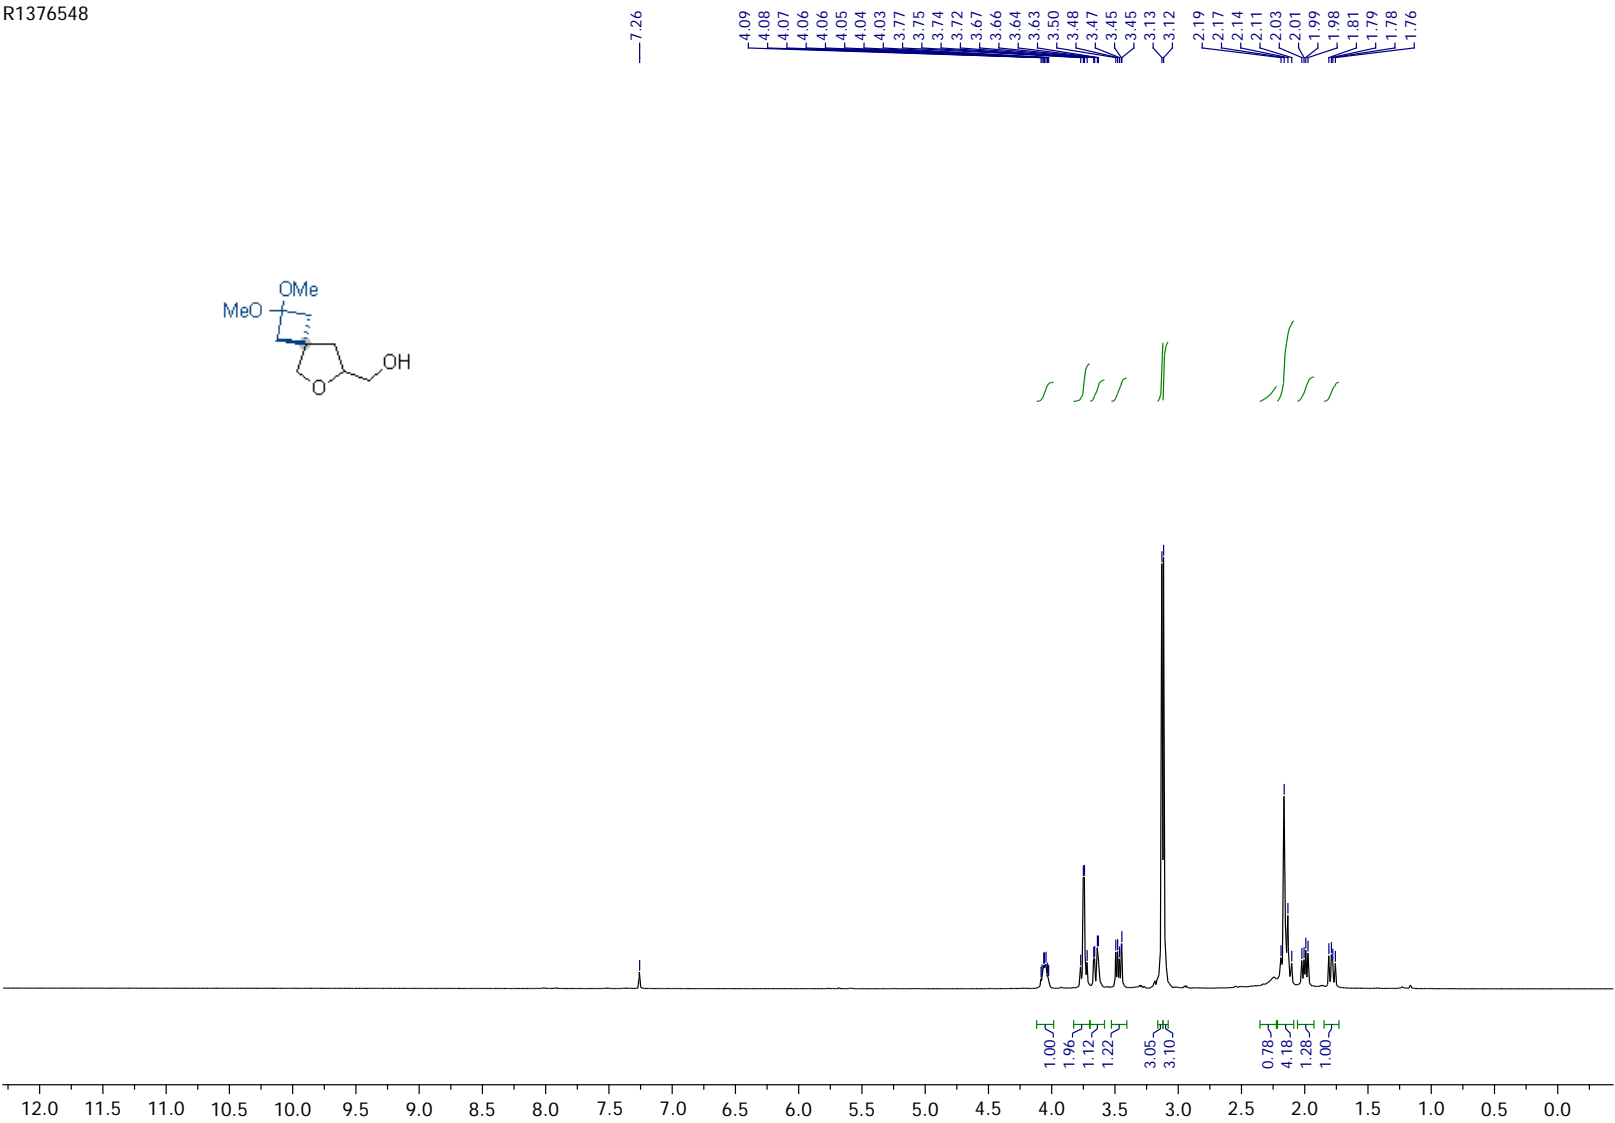

R1376548\_C13

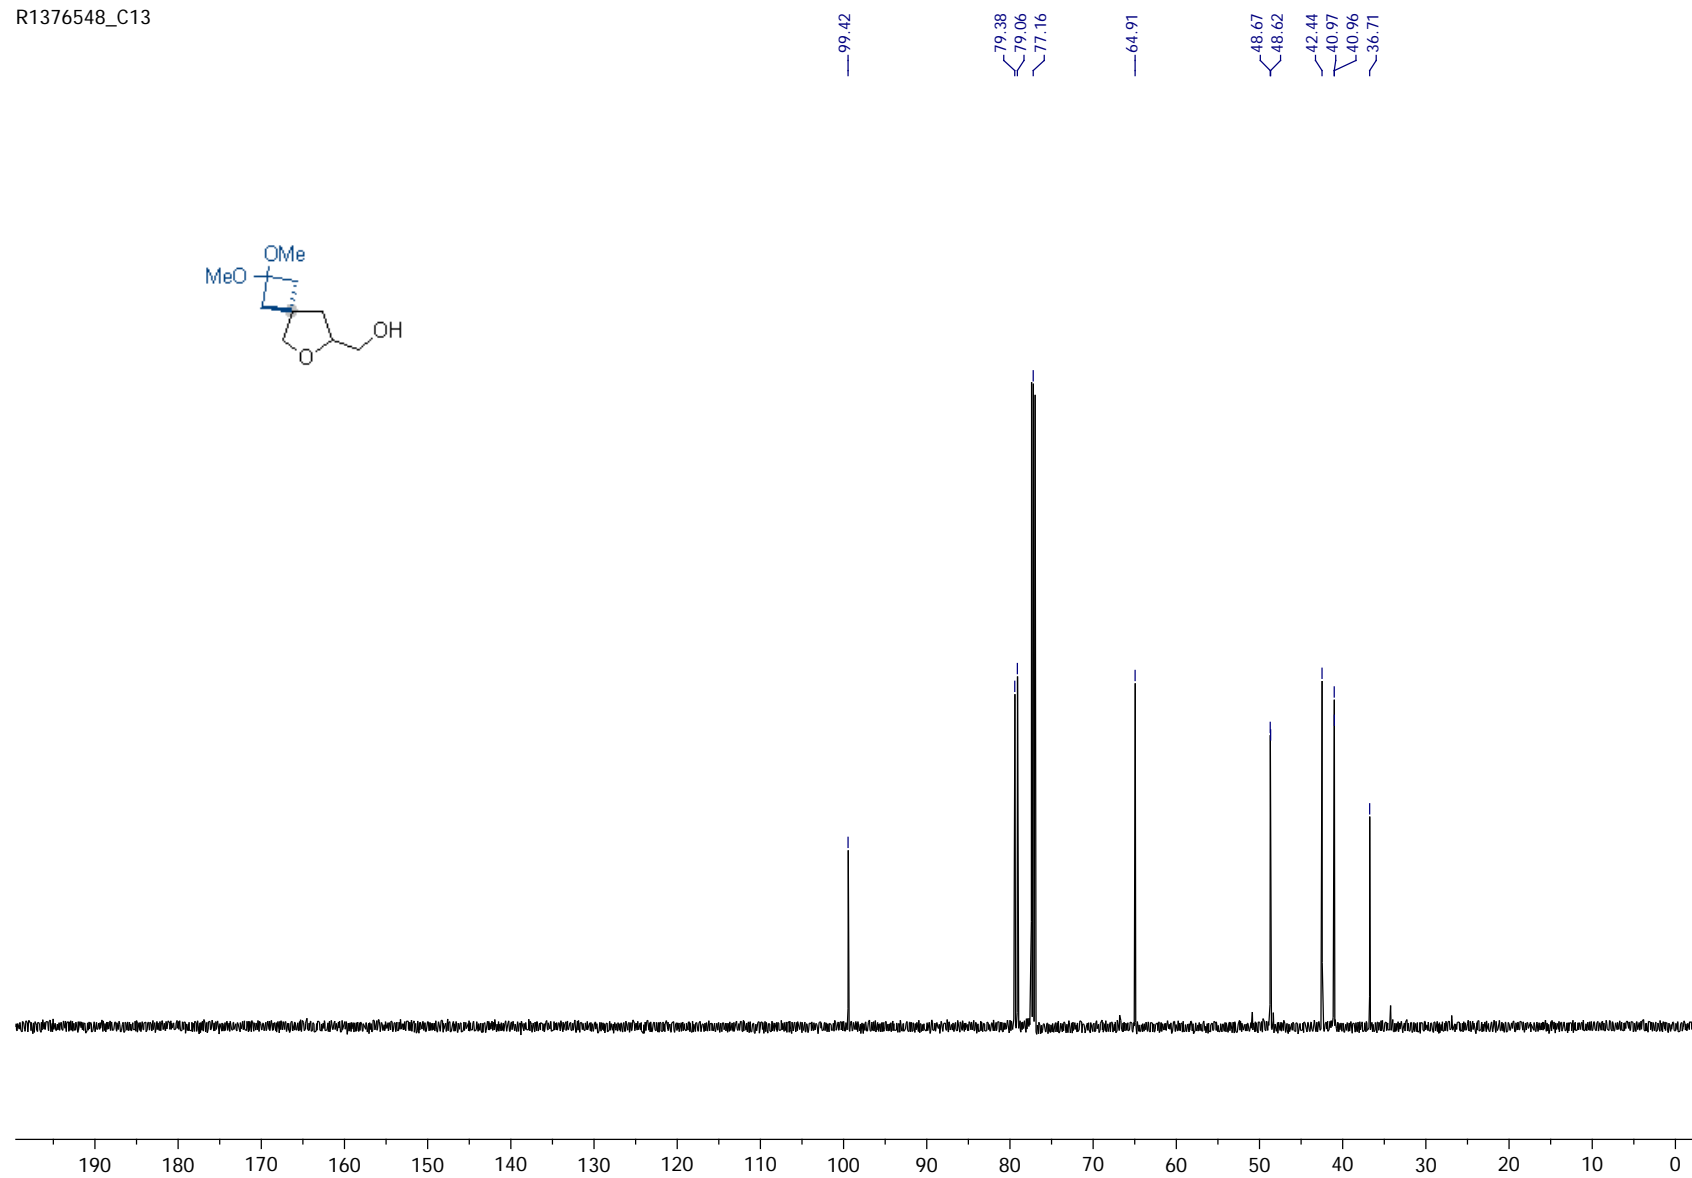

Compound 8c

R1485146

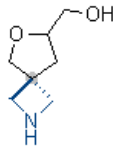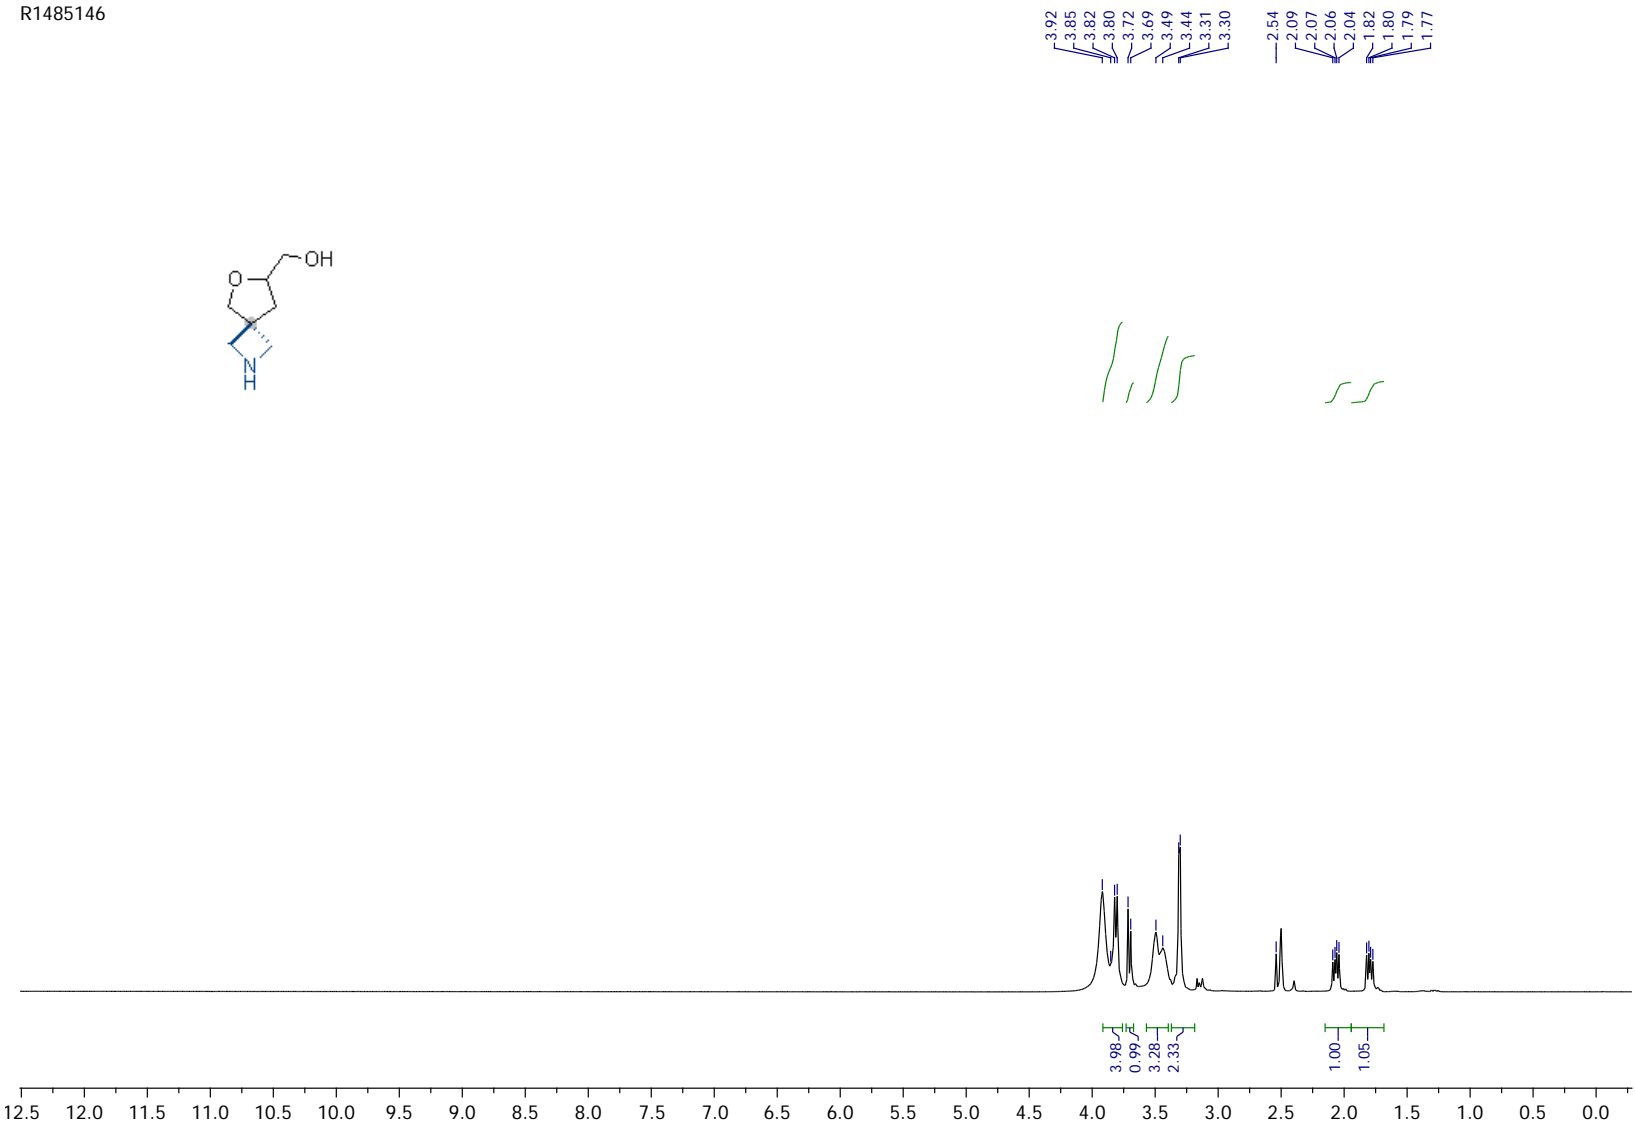





Compound 9c

R1388254

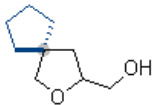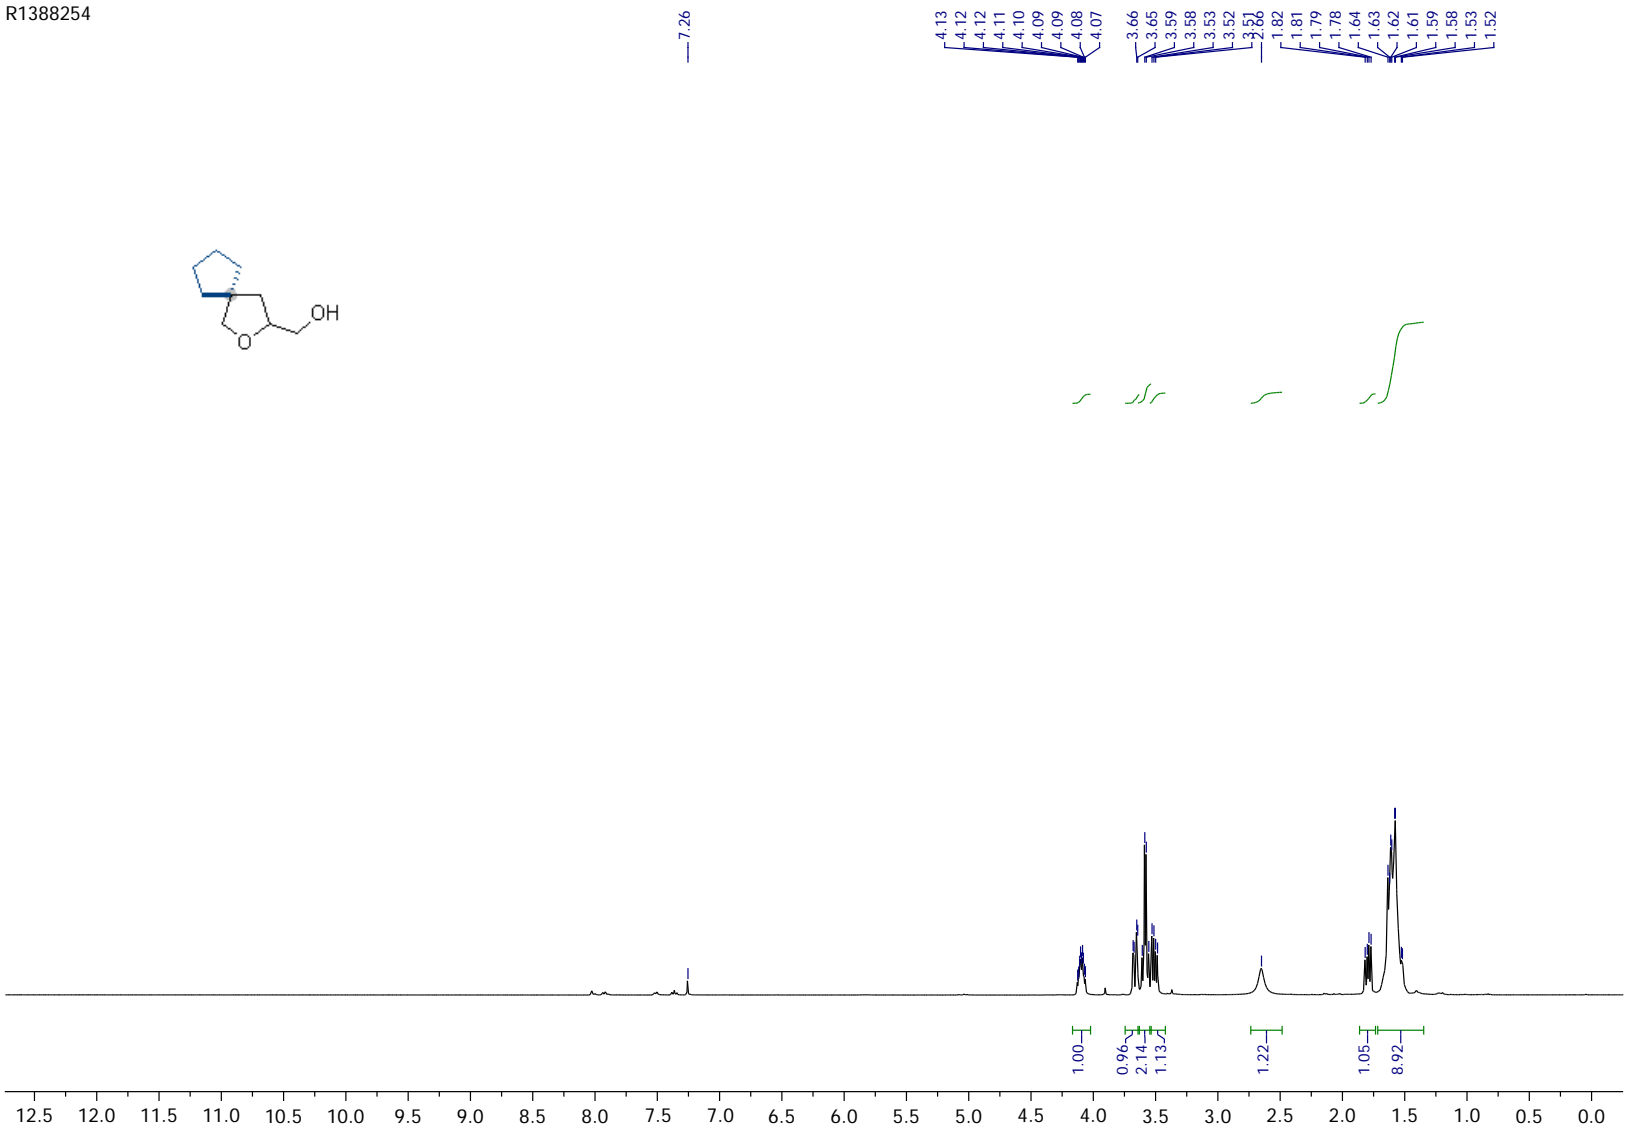

R1388254\_C13

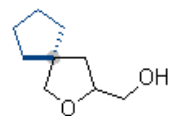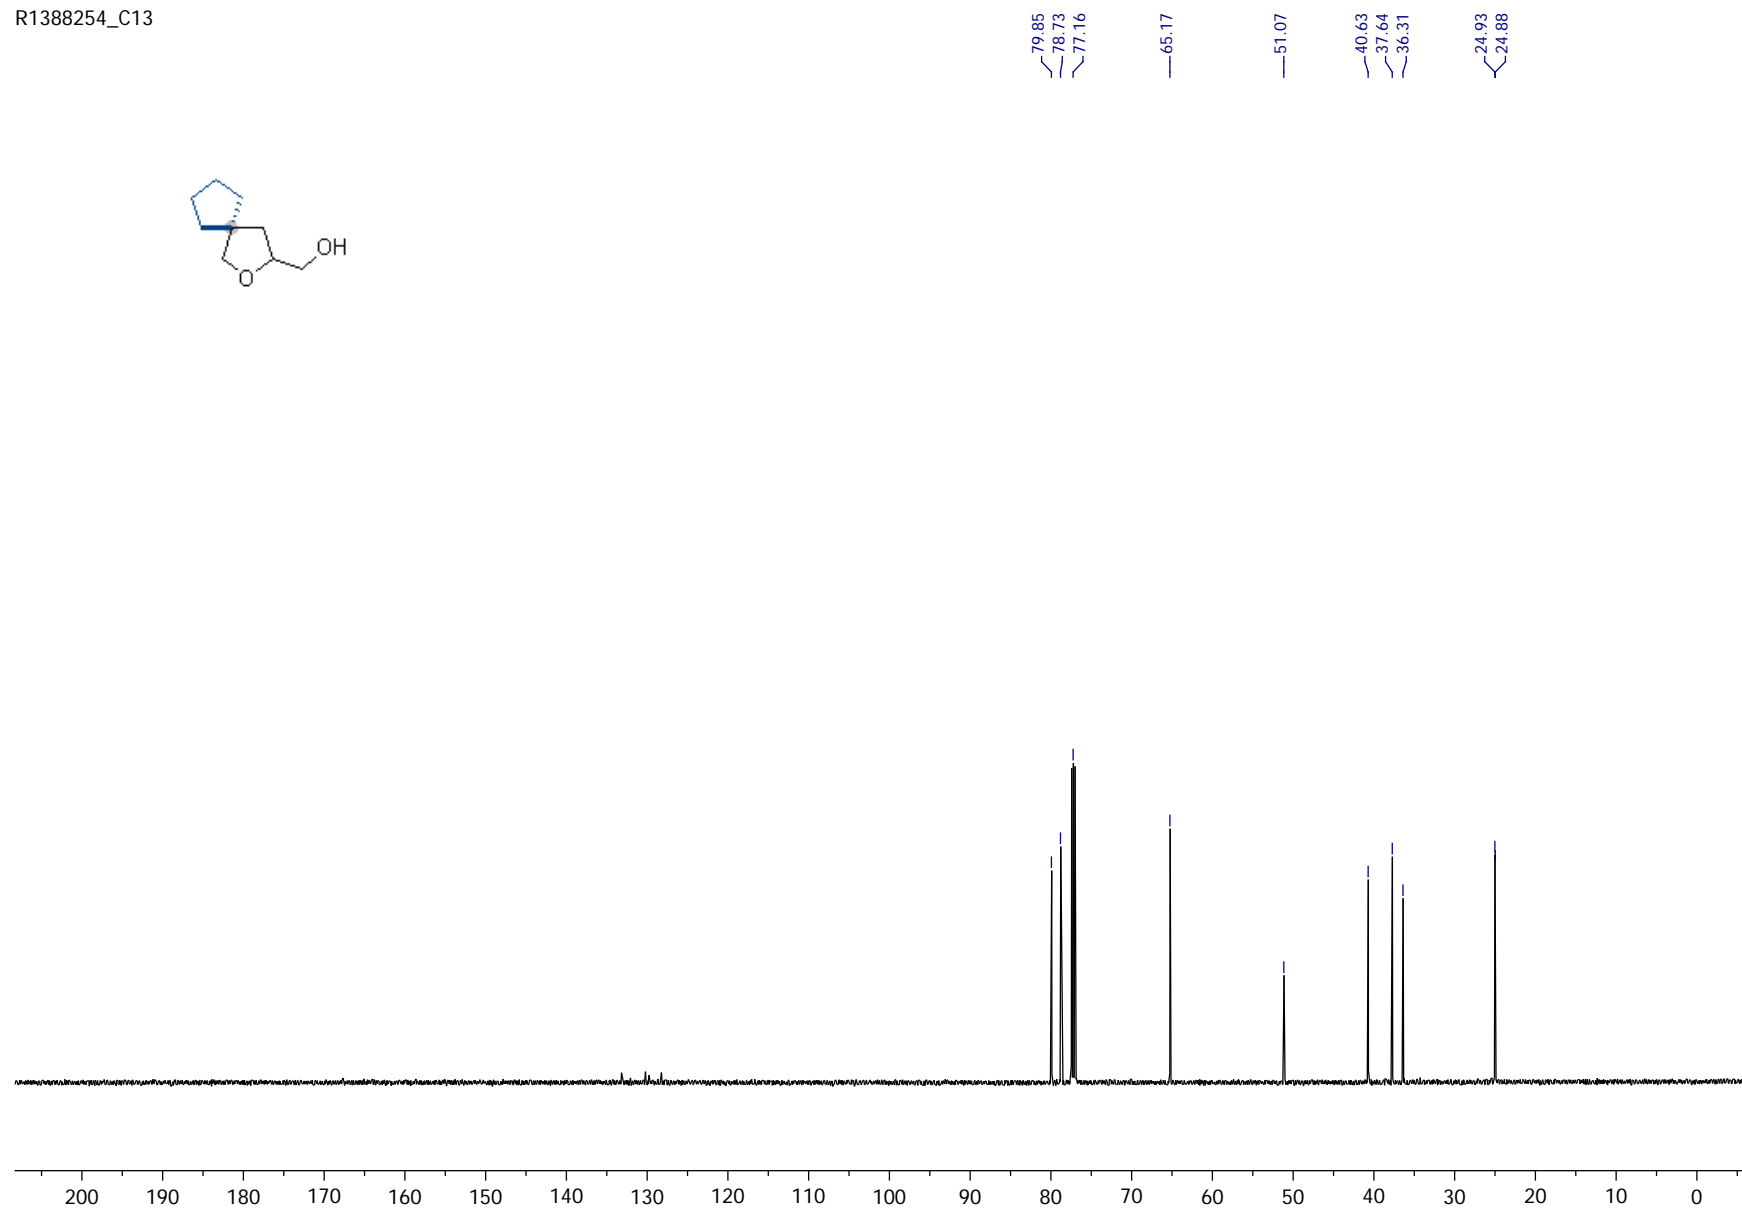

Compound 13c

R1389529

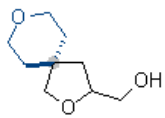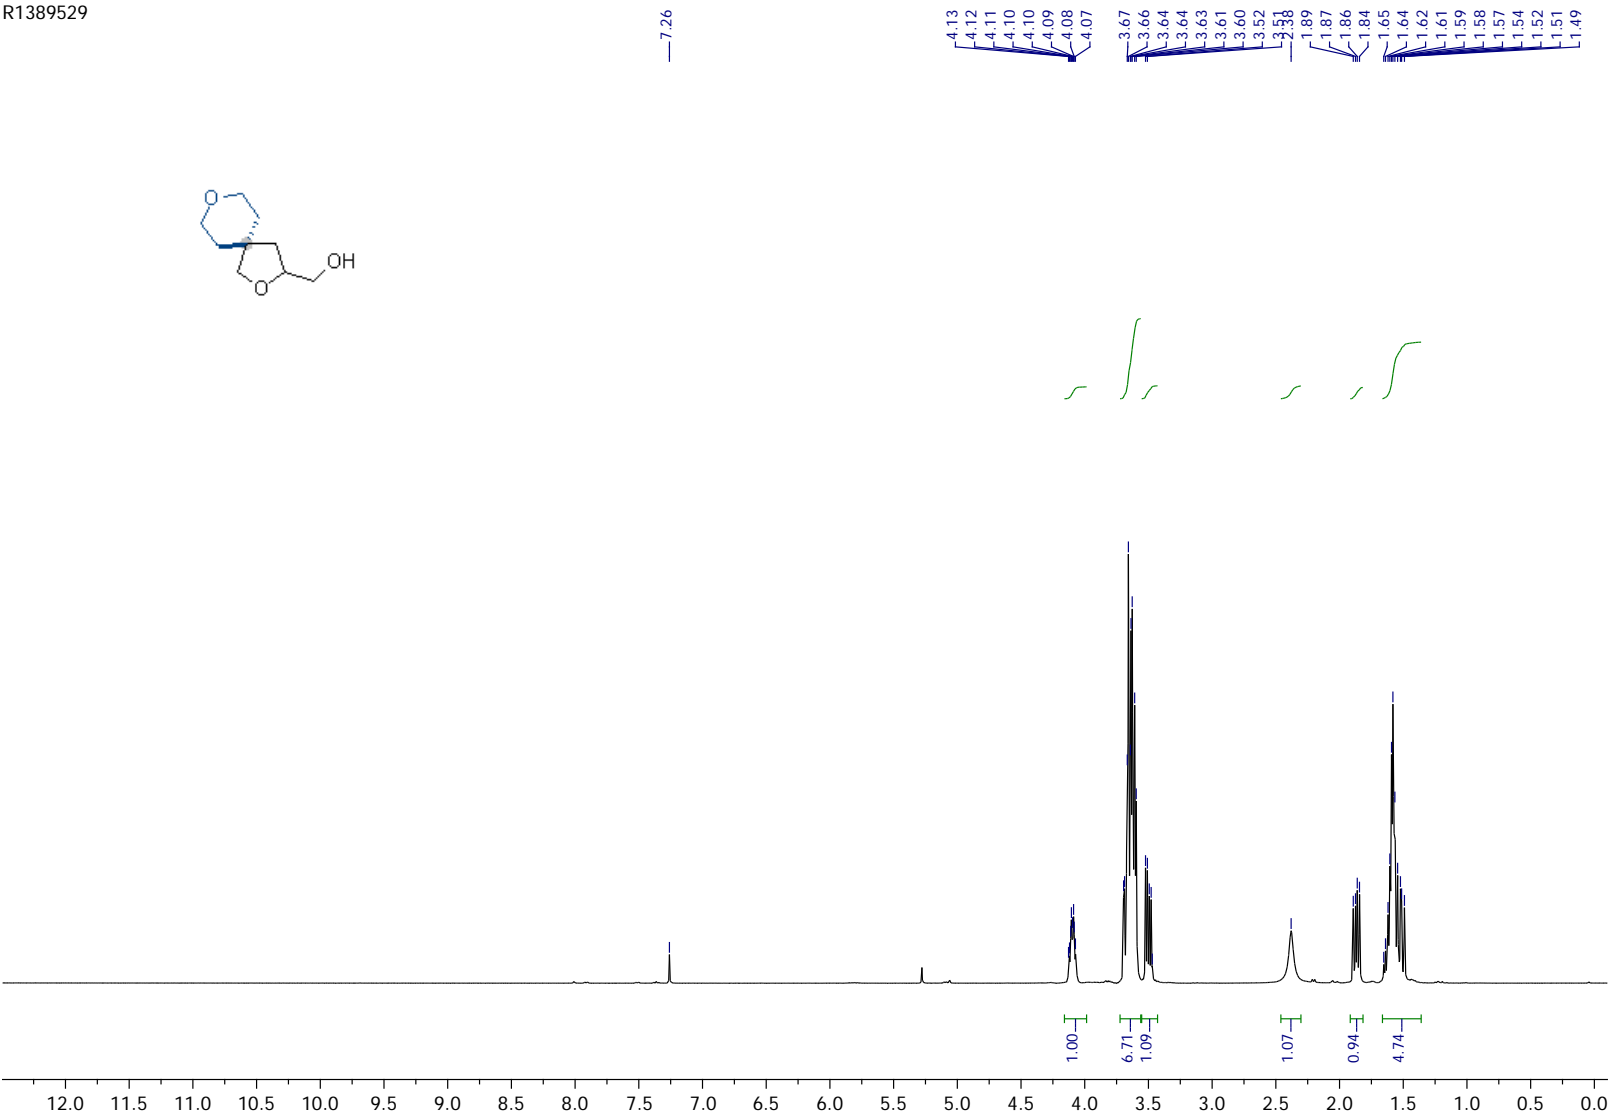

R1389529\_C13

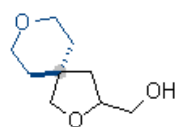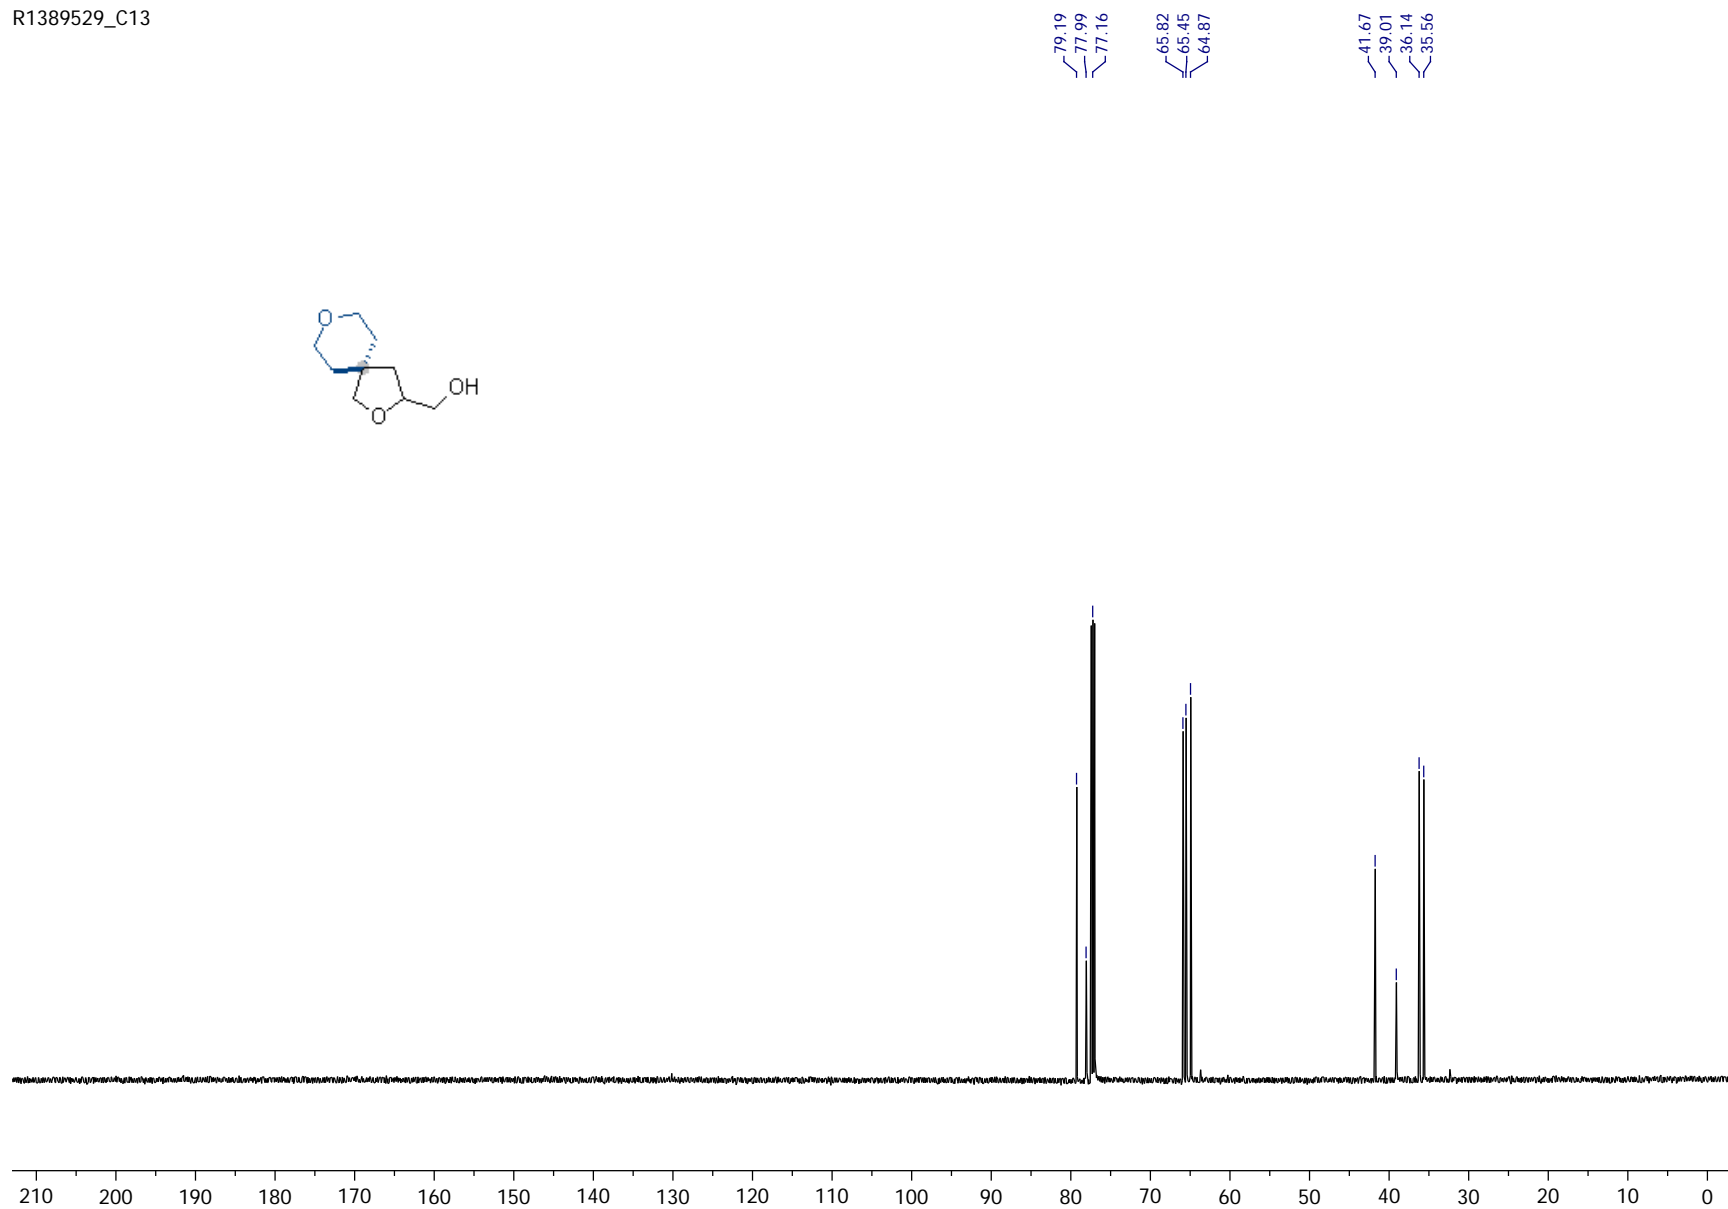

Compound 14c

R1028559

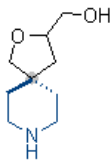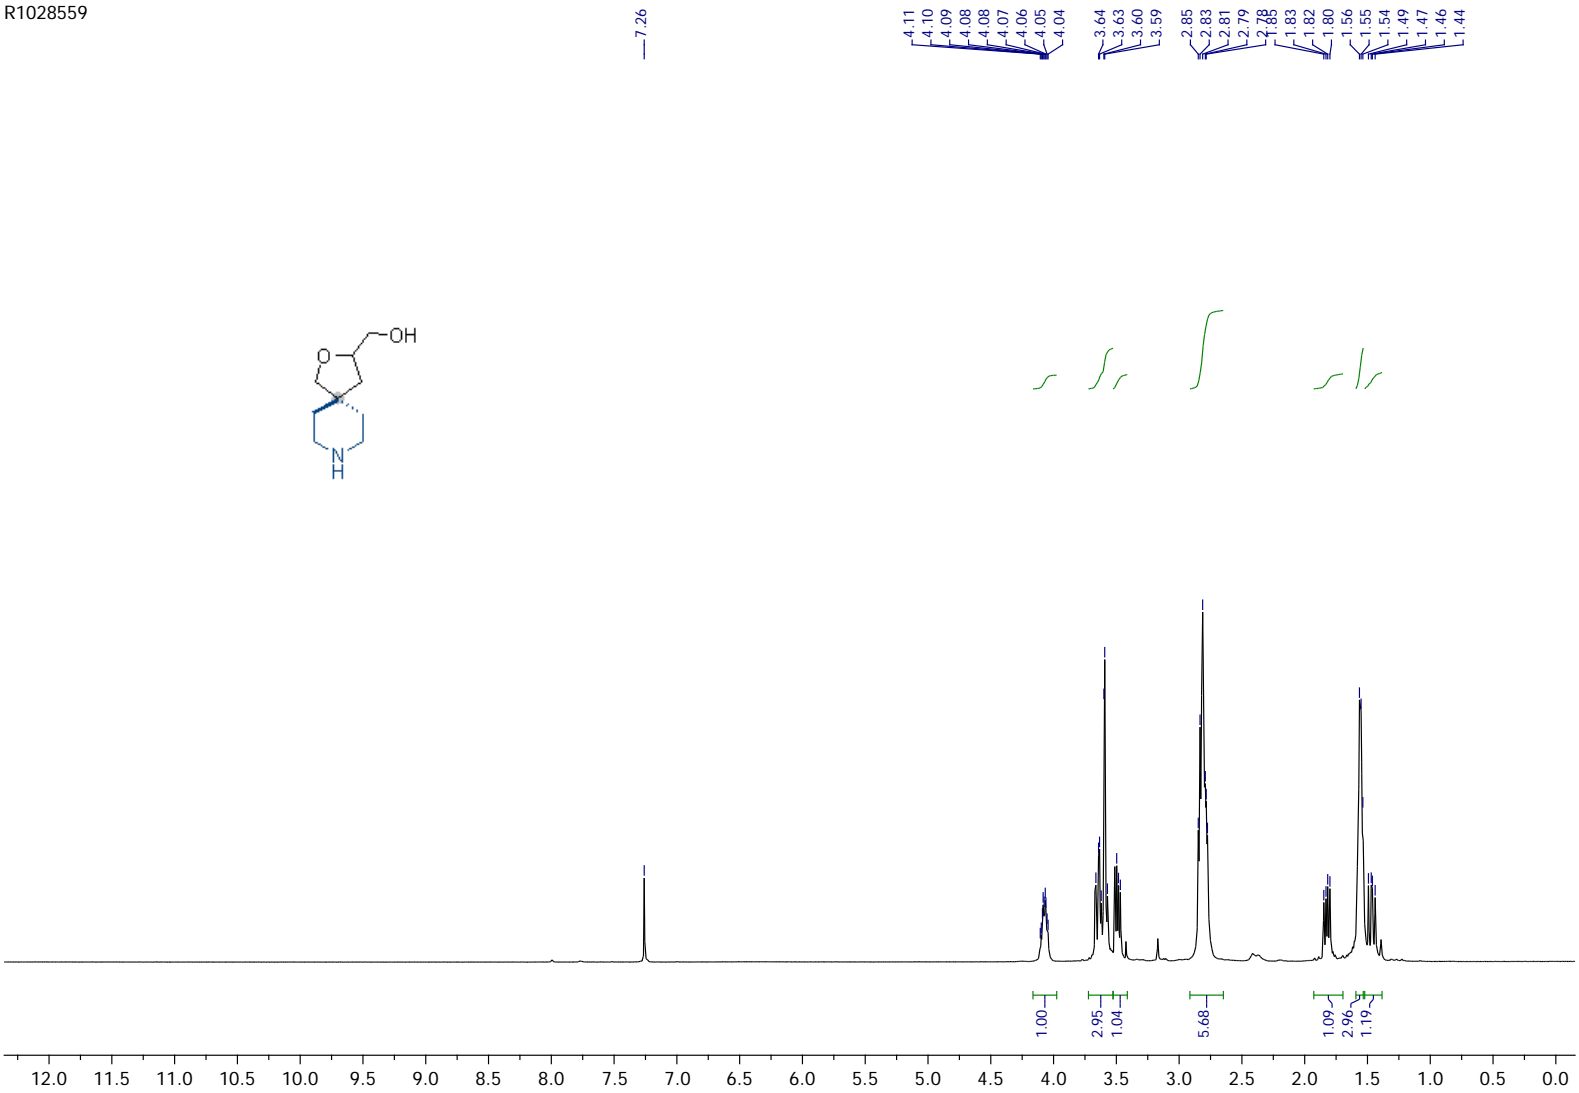

R1028559\_C13

|||||

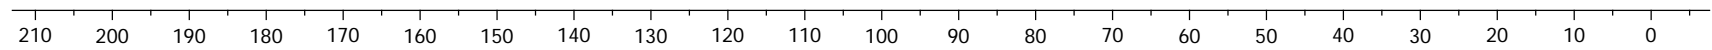

Compound 22c

R635146

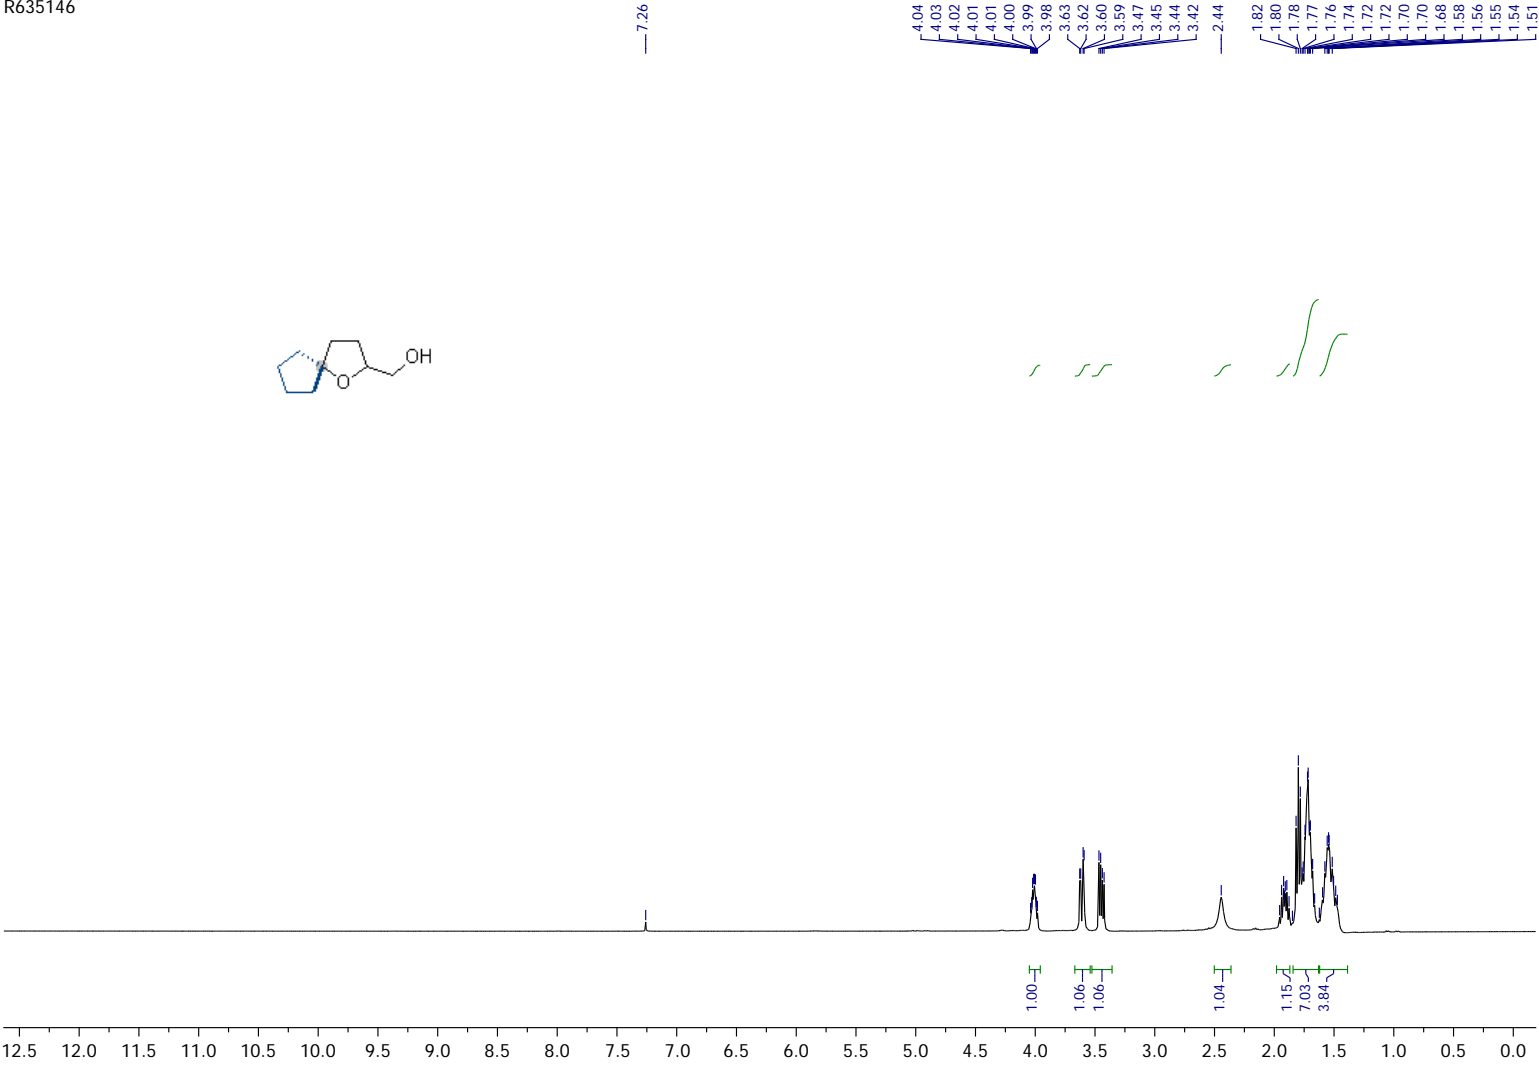





Compound 23c

R1104800

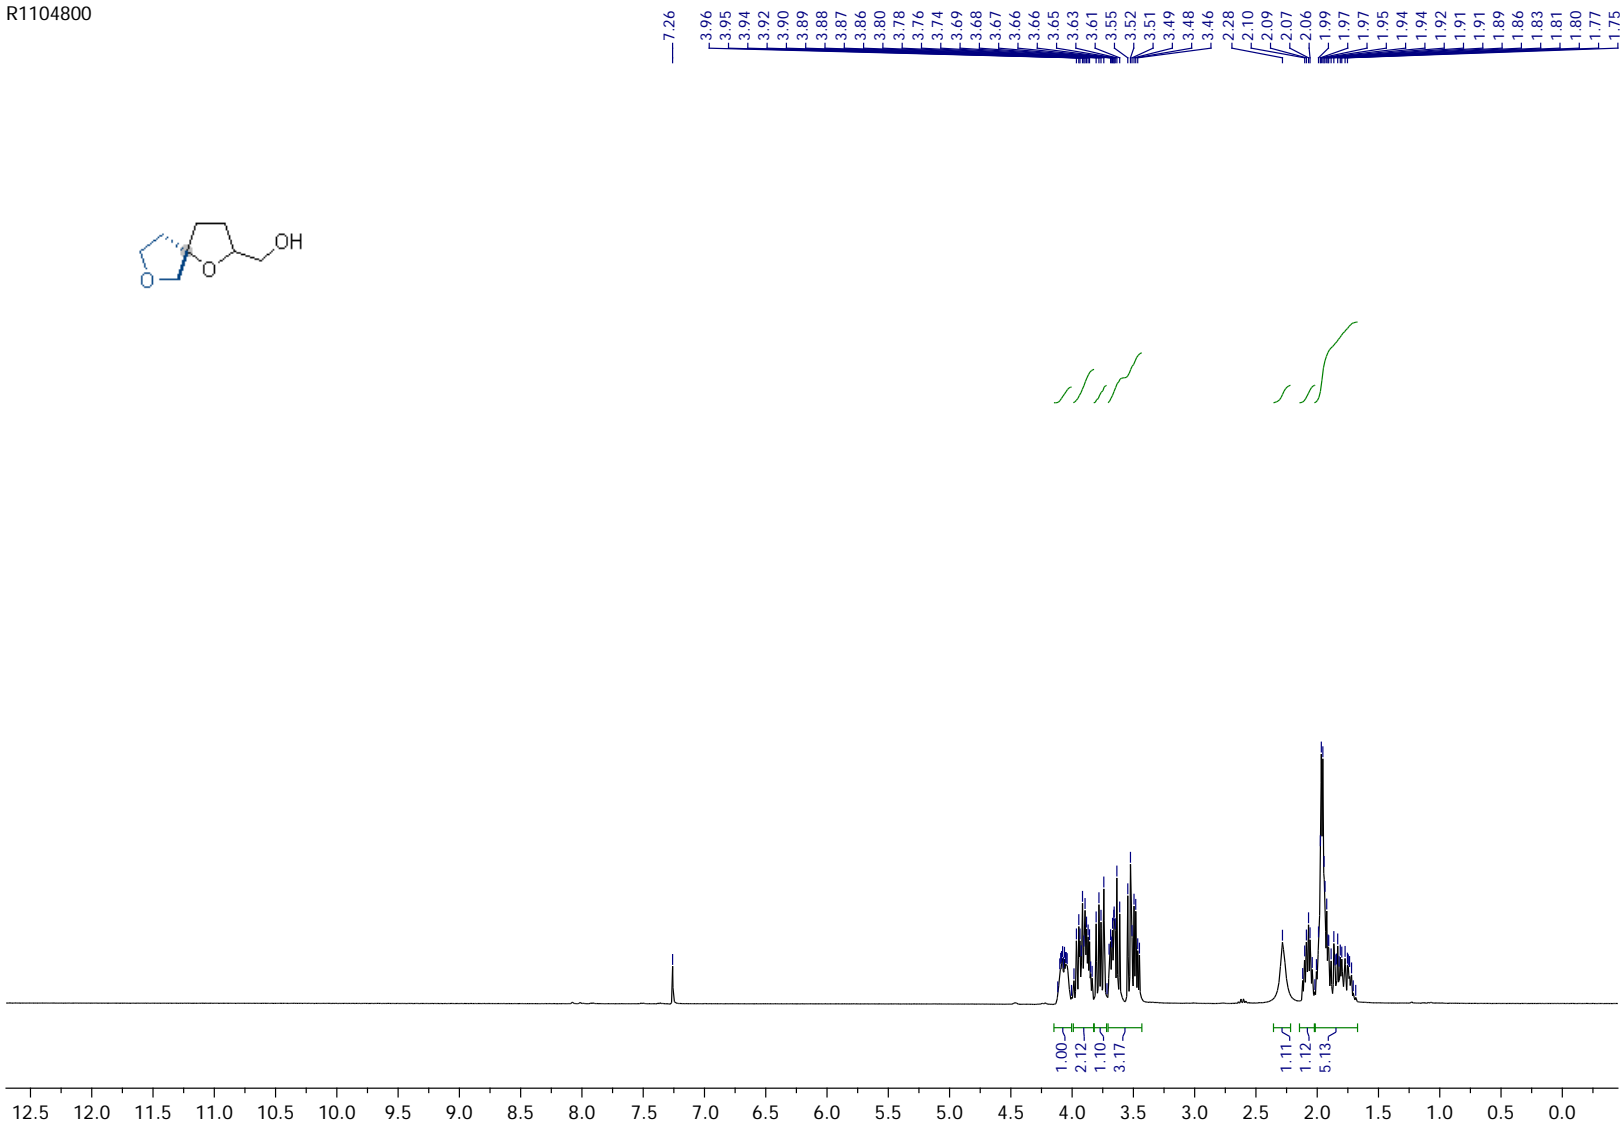

R1104800\_C13

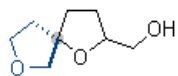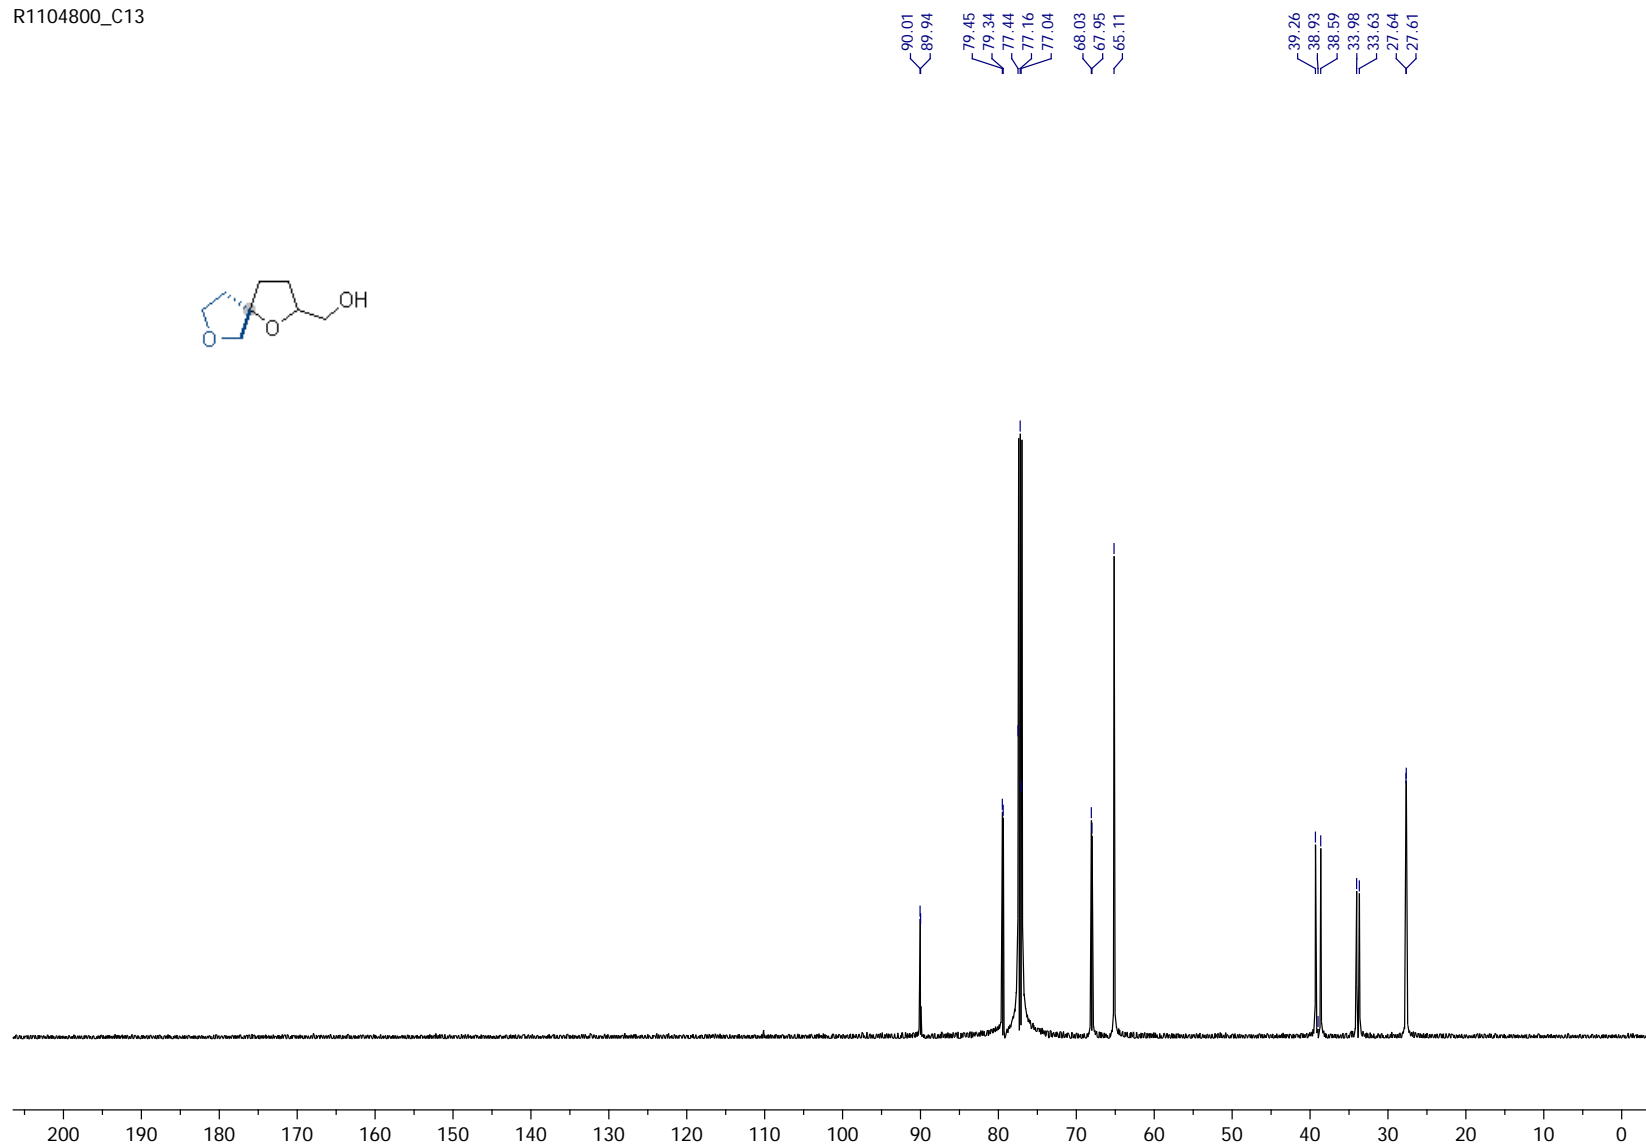

Compound 24c

R814998

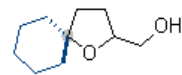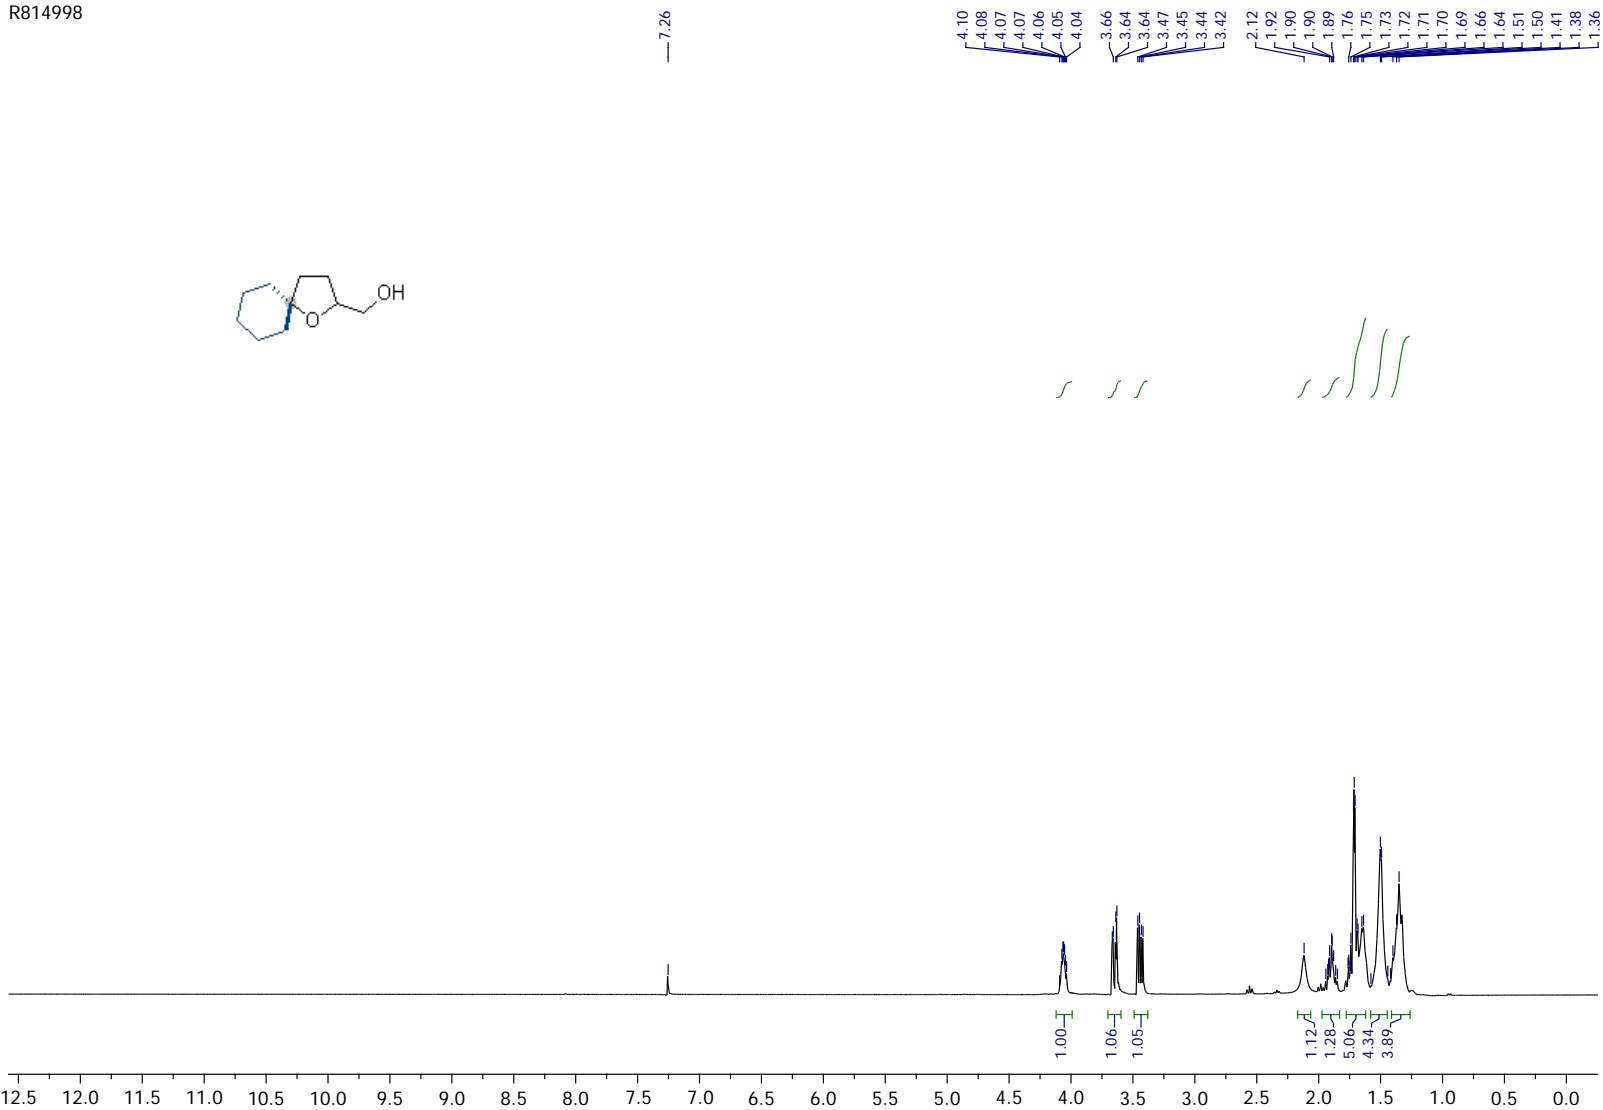

R814998\_C13

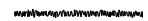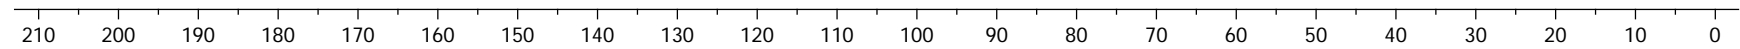

Compound 27c

R1314760

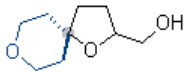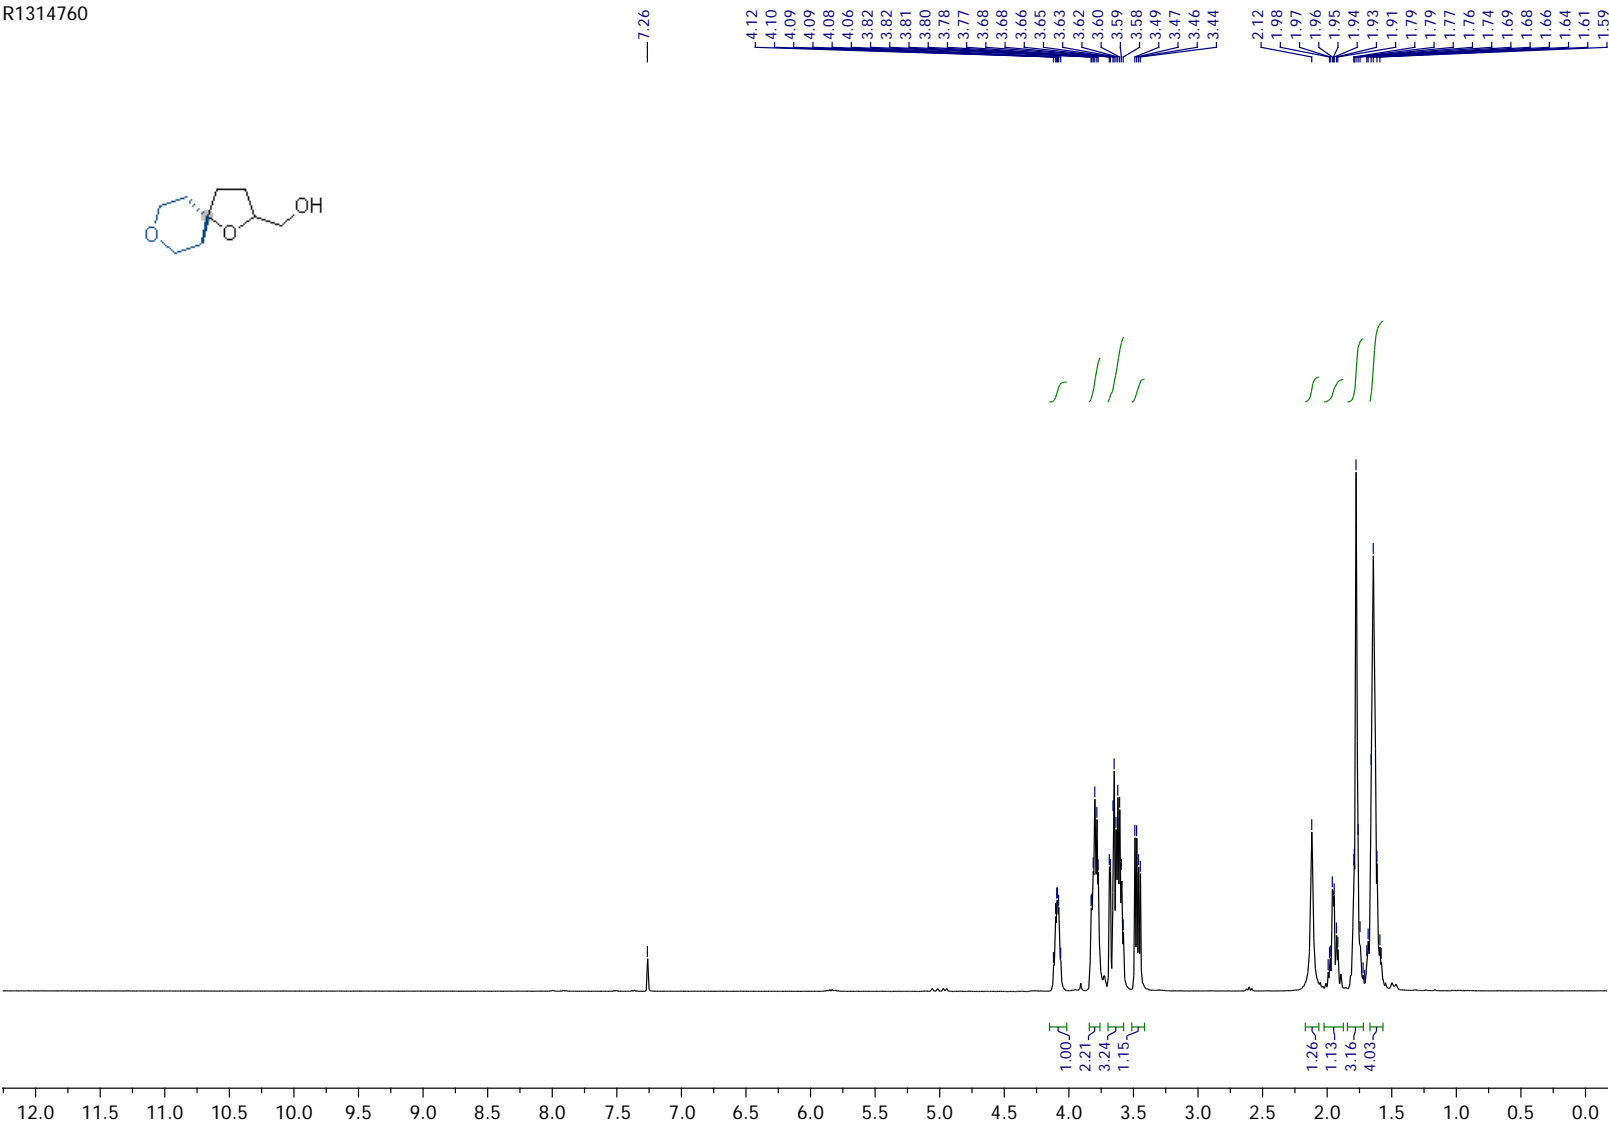

R1314760\_C13

|||||

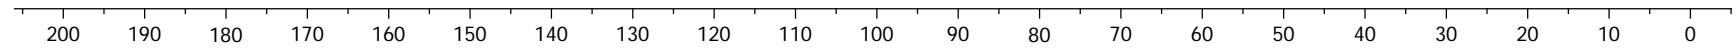

Compound 30c

R1314564

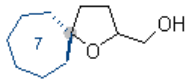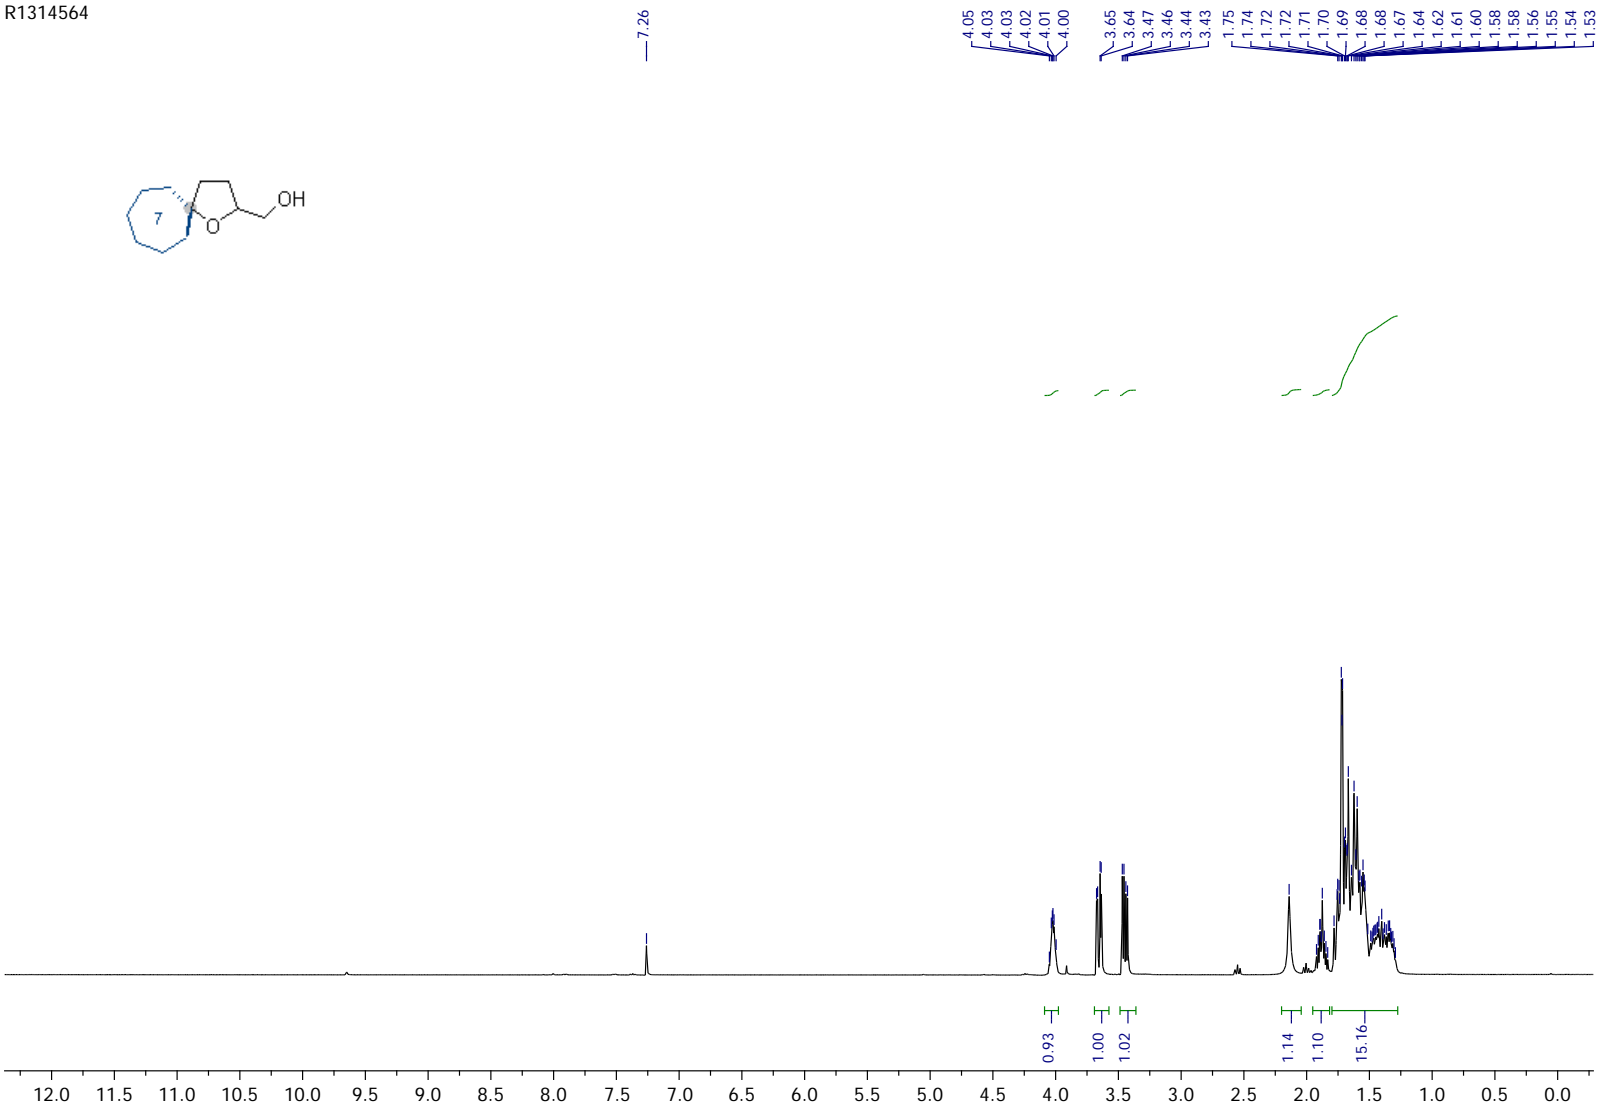

R1314564\_C13

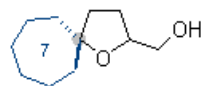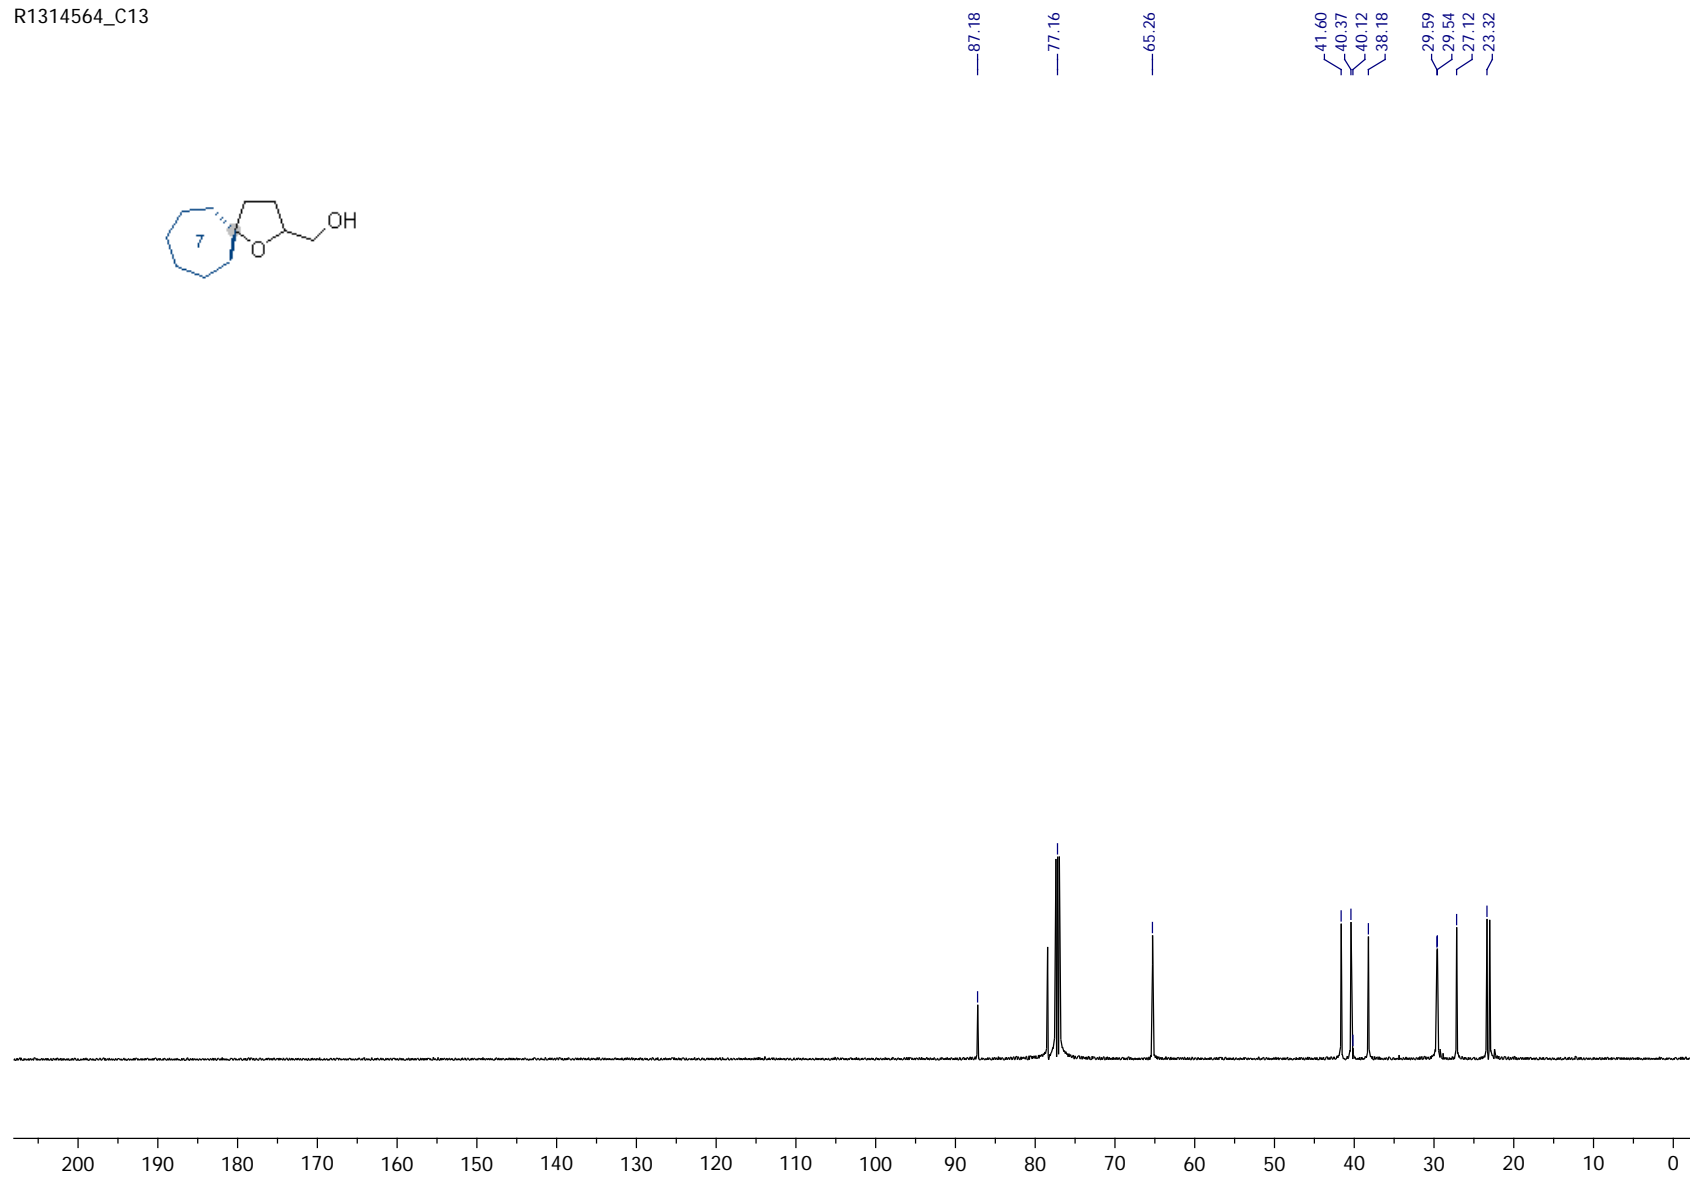



Compound 31c

R1416685

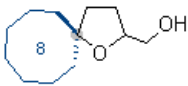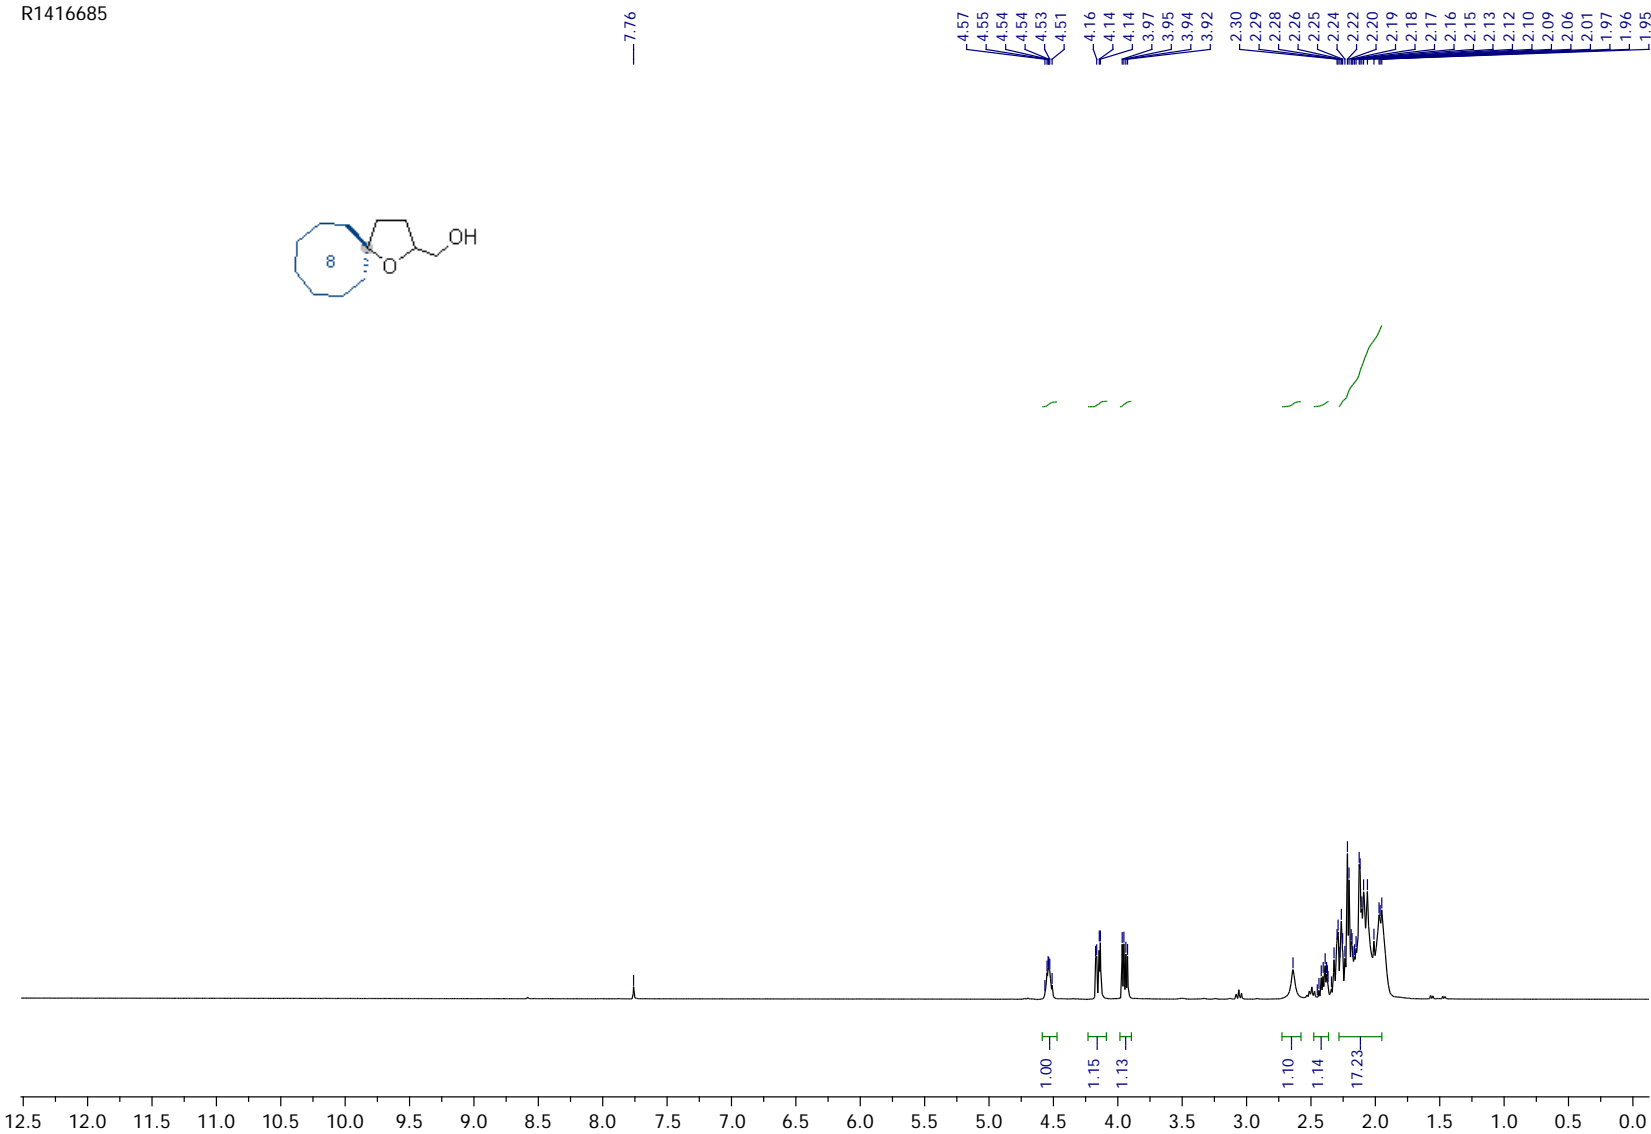



Compound 34c

R1691986

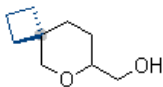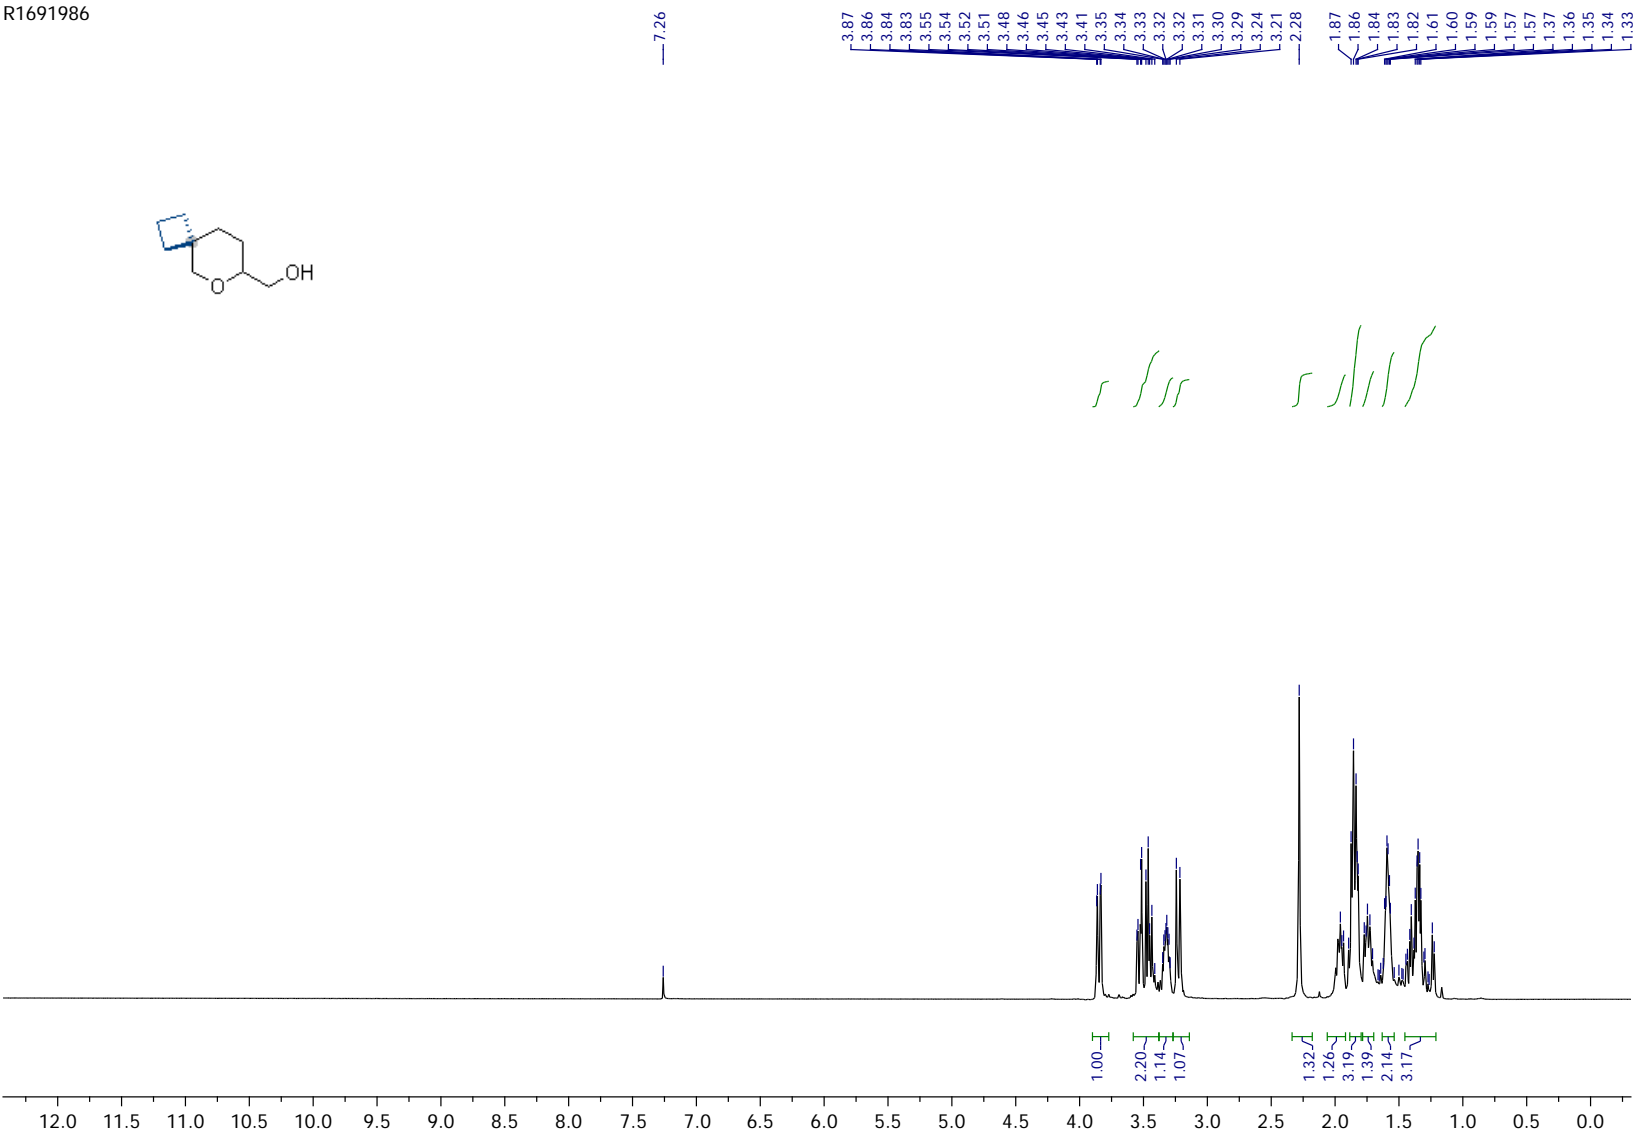

R1691986\_13C

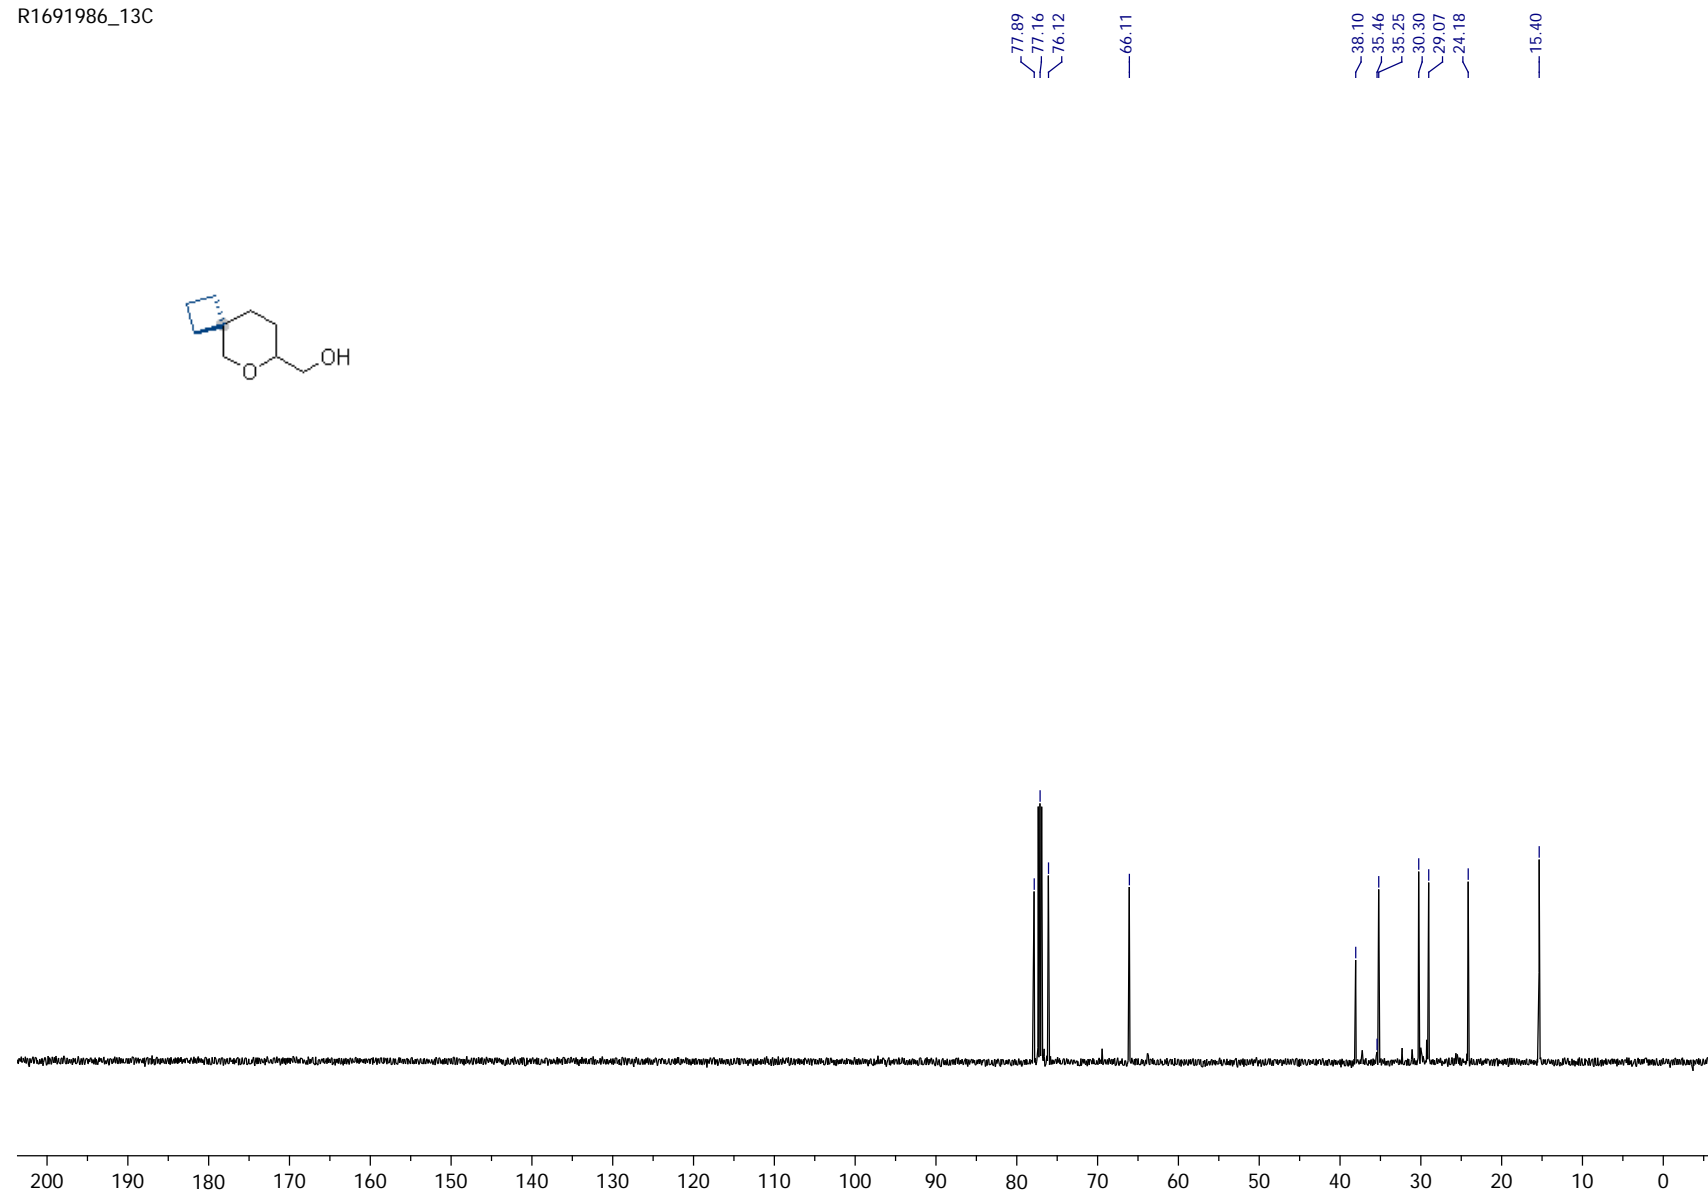

Compound 36c

R1617948

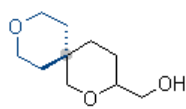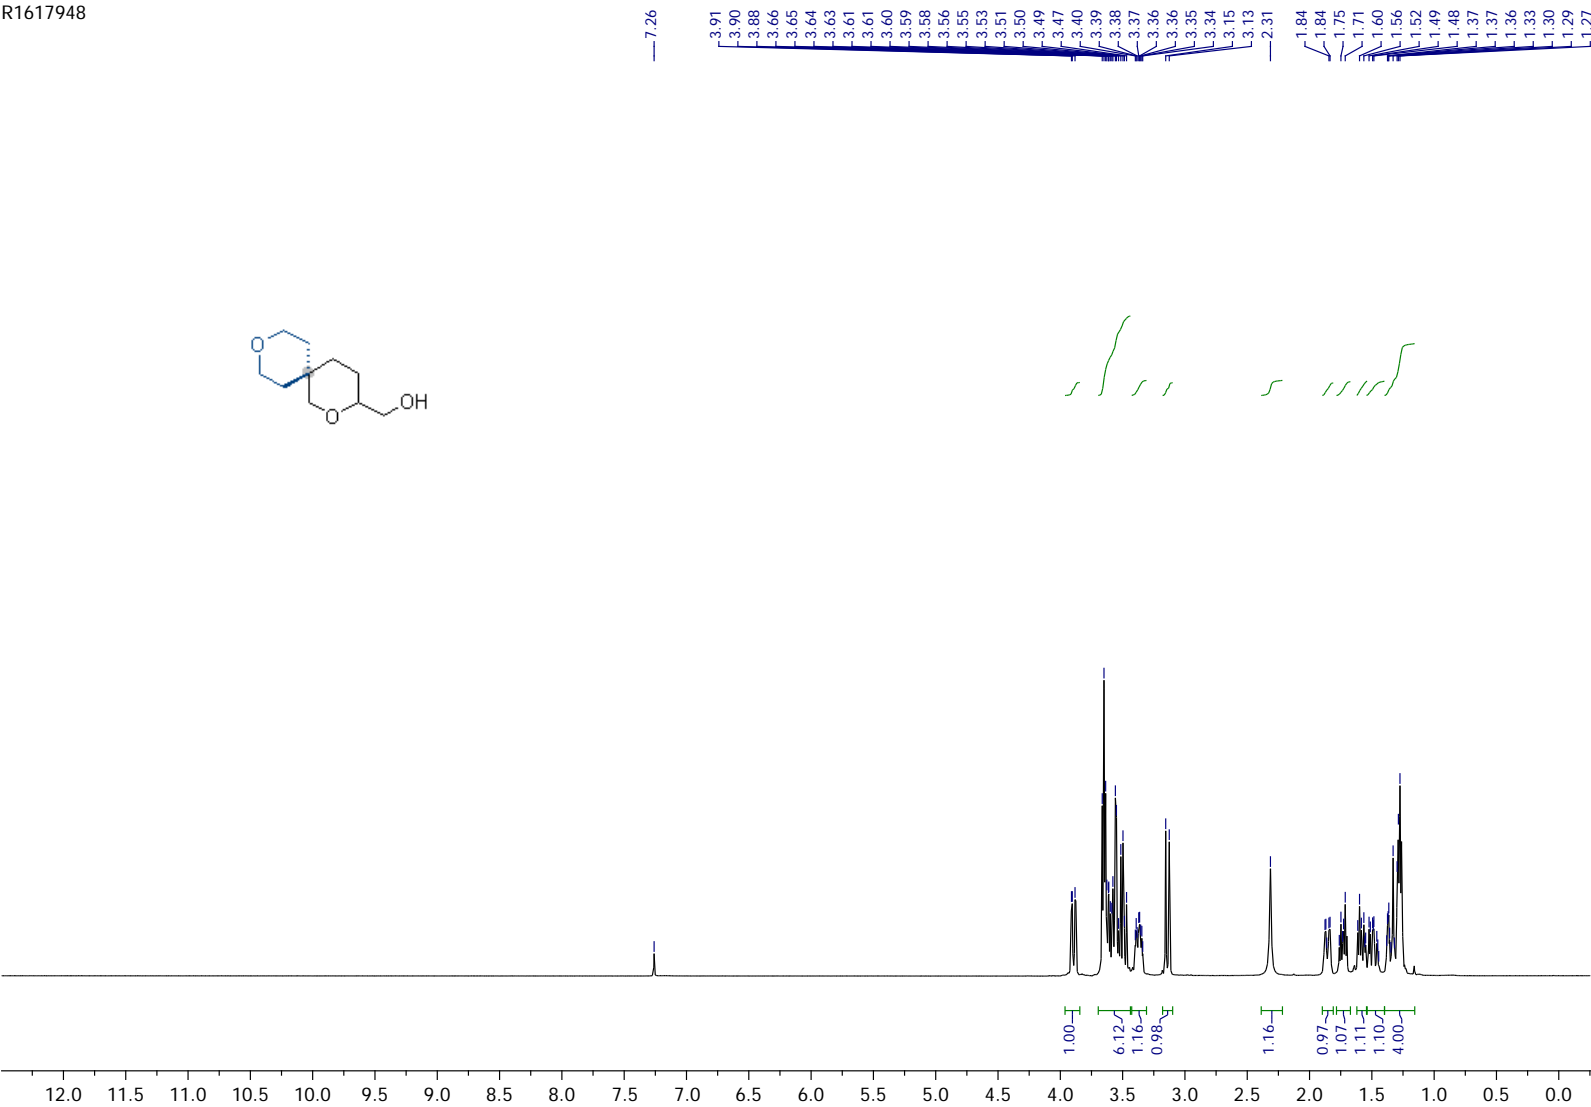

R1617948\_13C

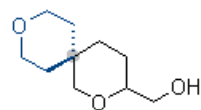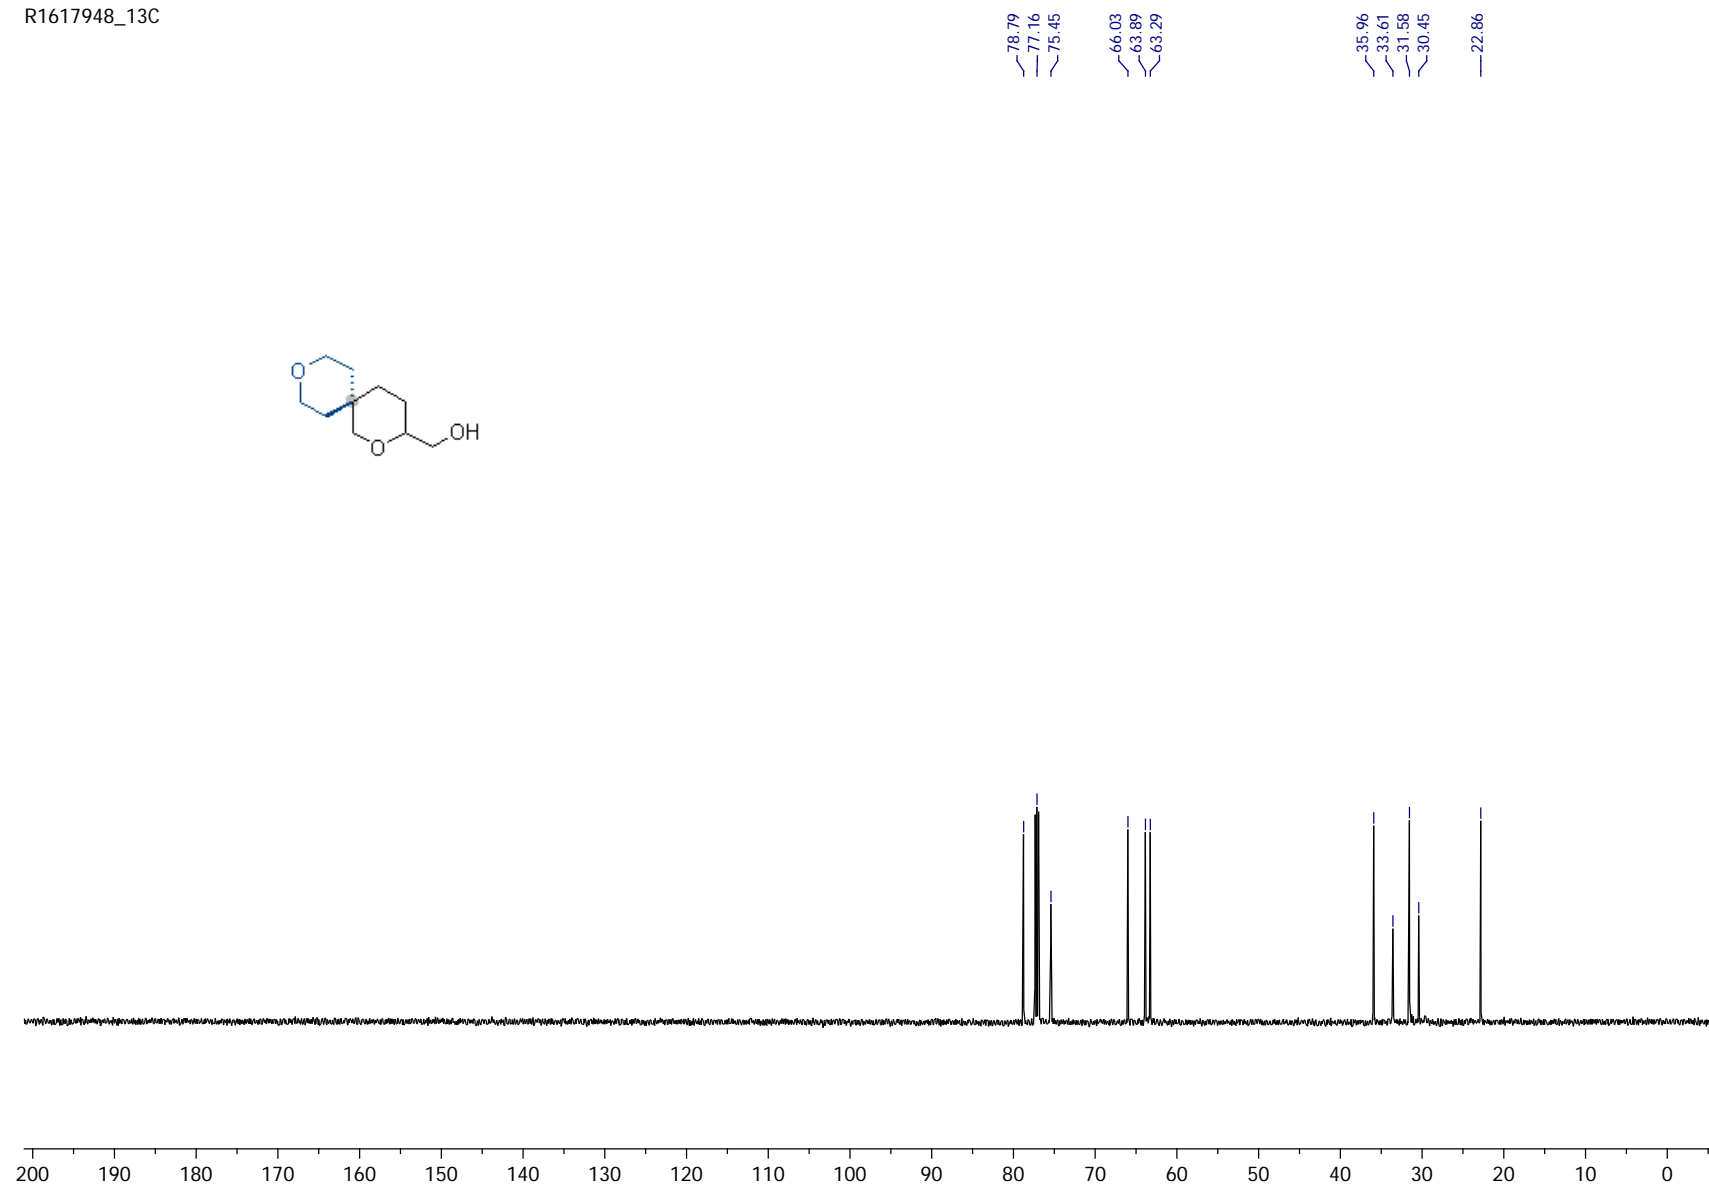

Compound 4d

R1749961

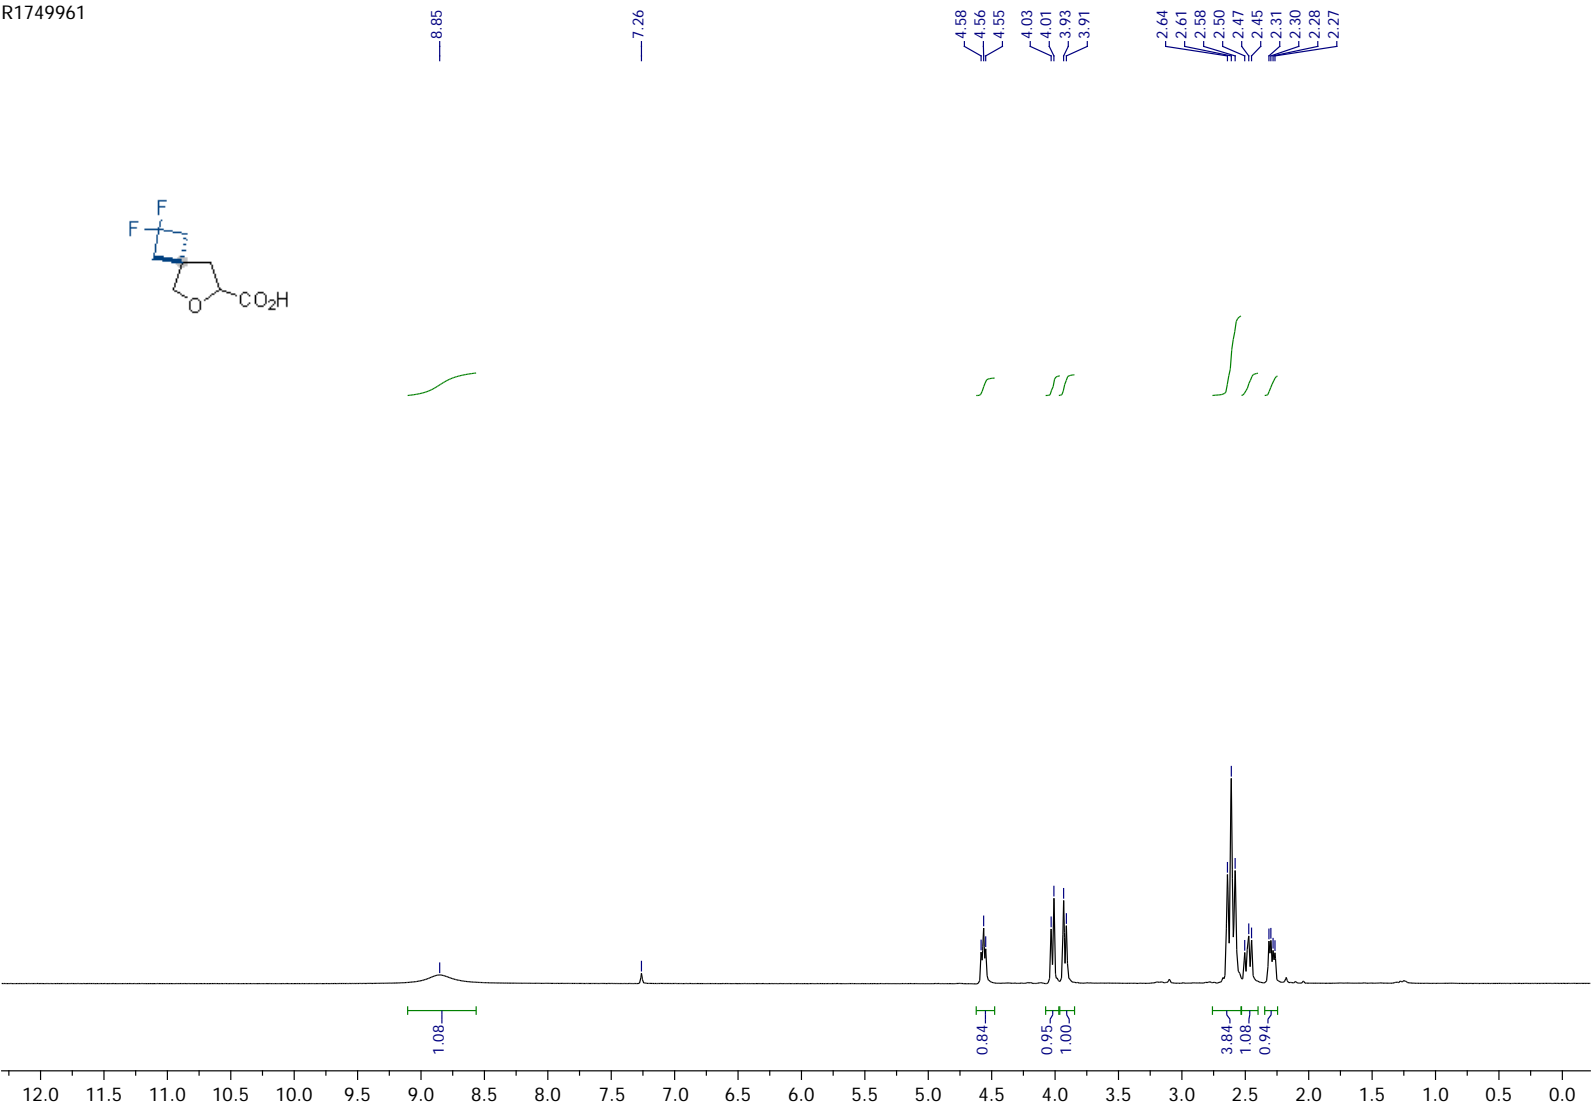

R1749961\_C13

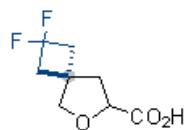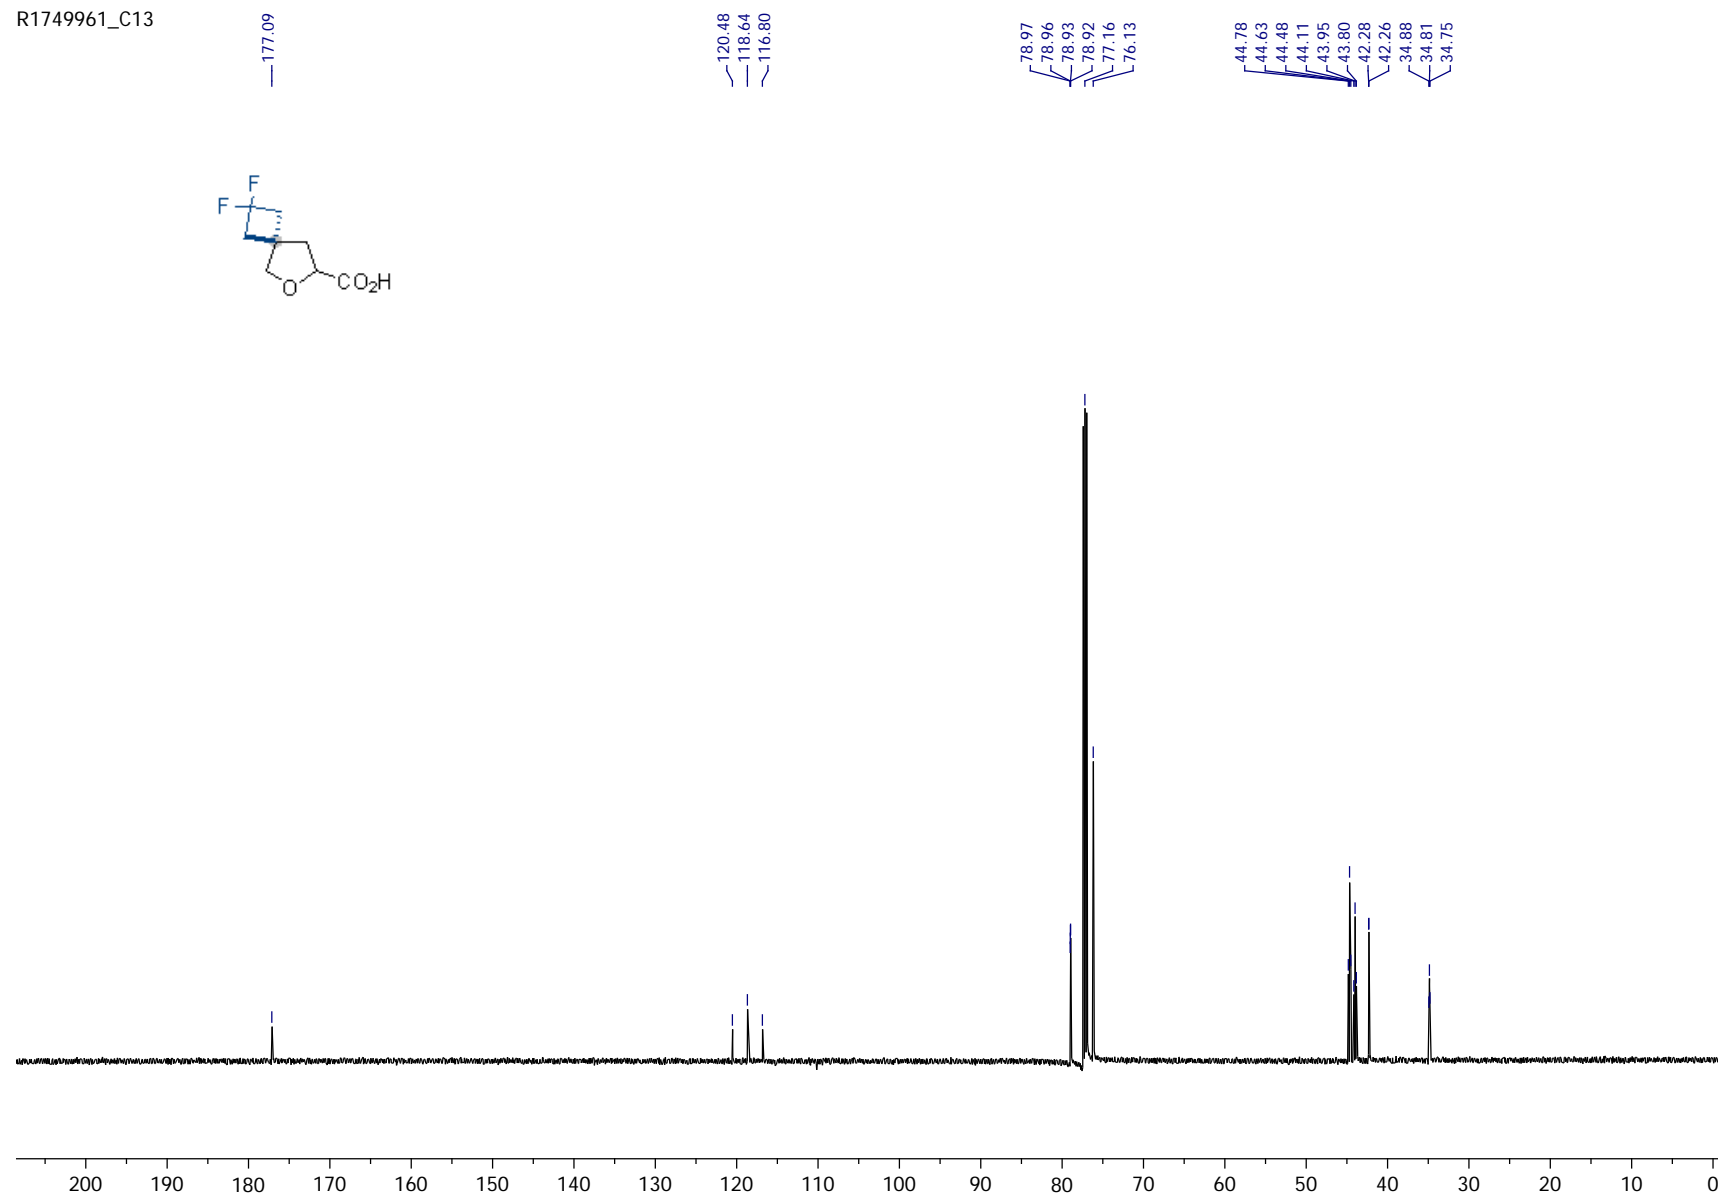



R1749961\_F19{H}

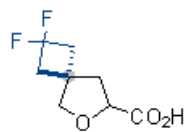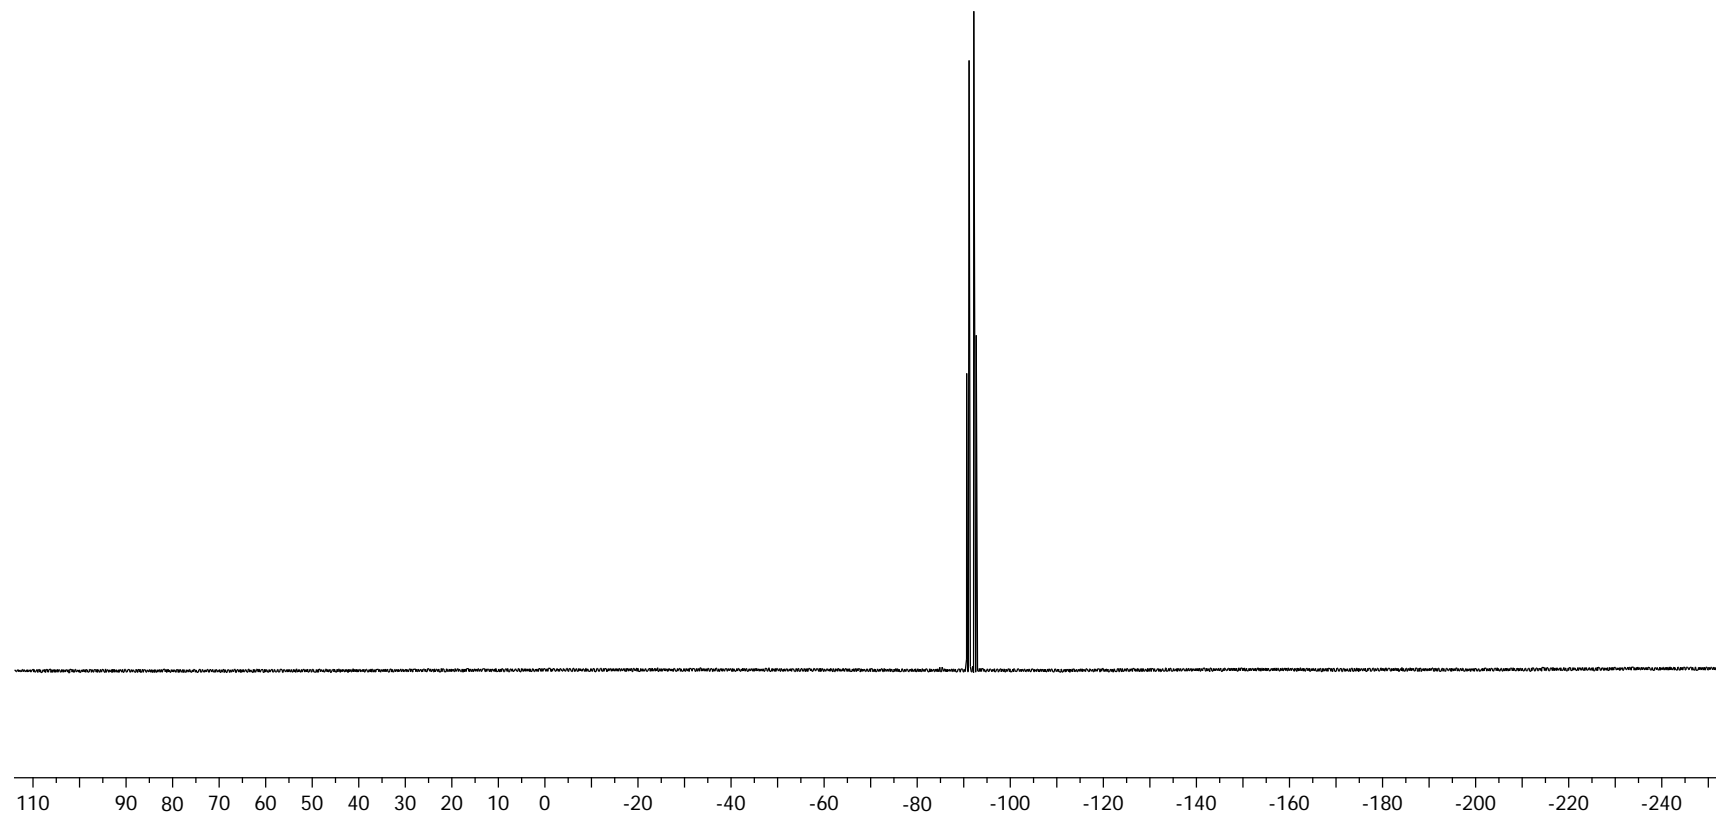

Compound 5d

R1416696

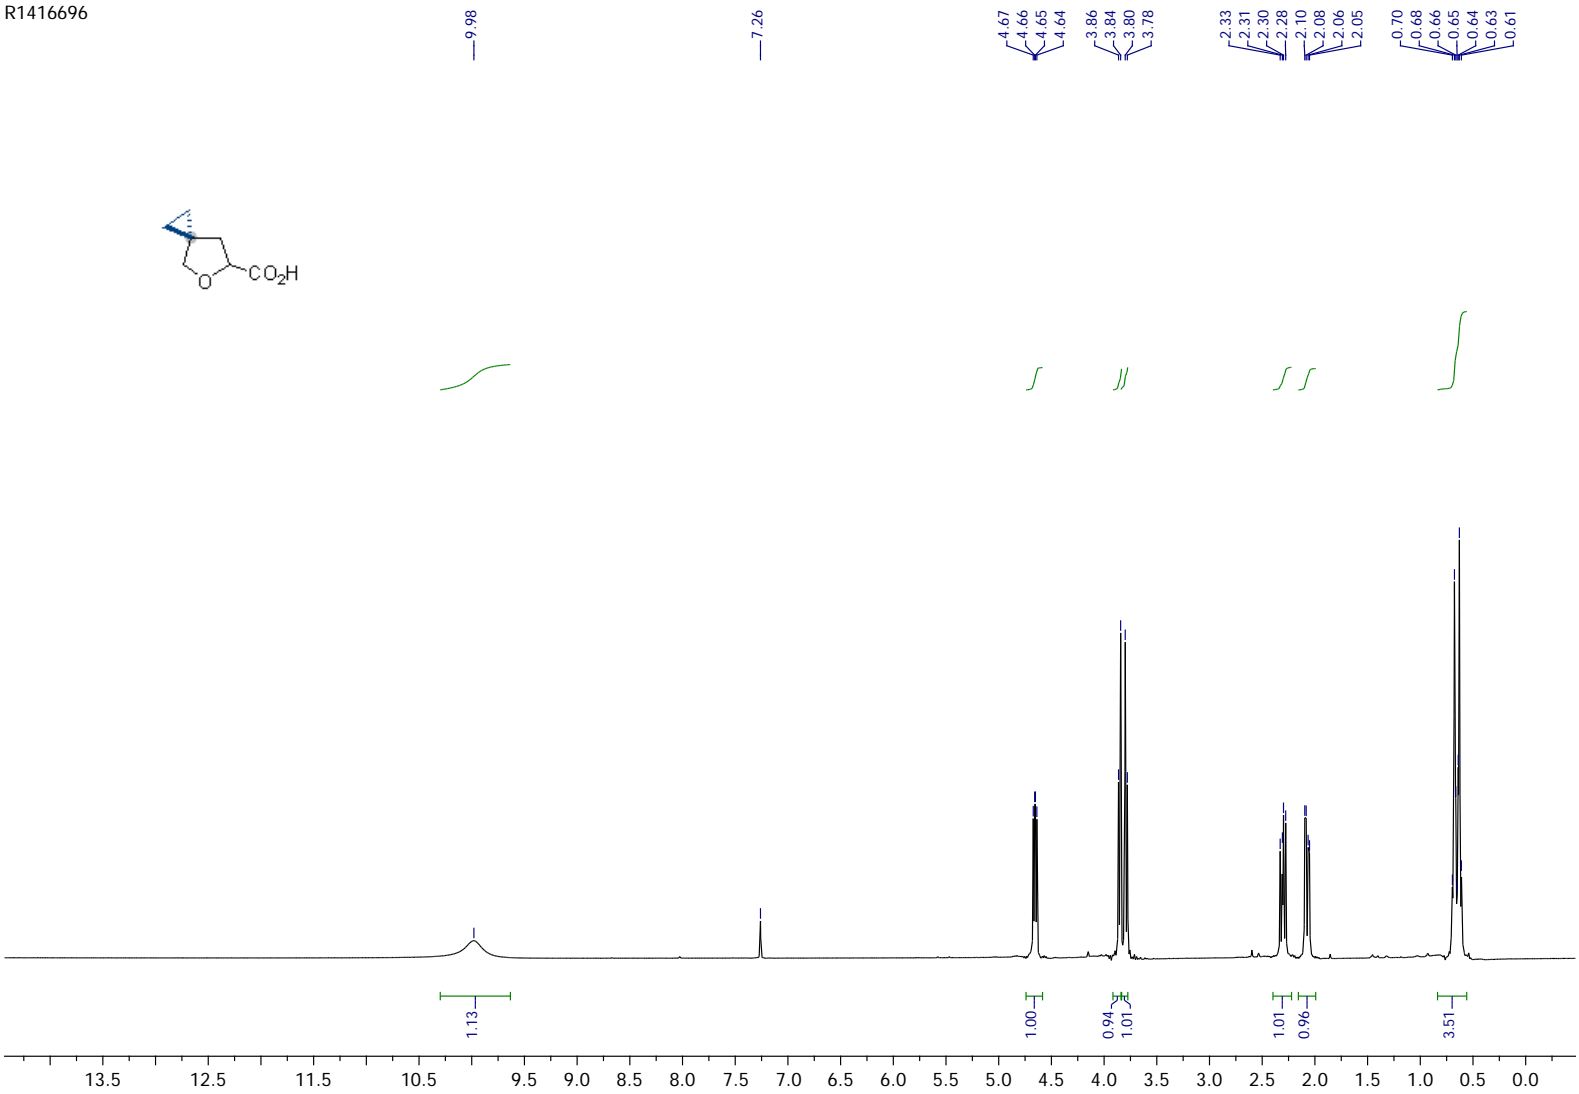

R1416696\_C13

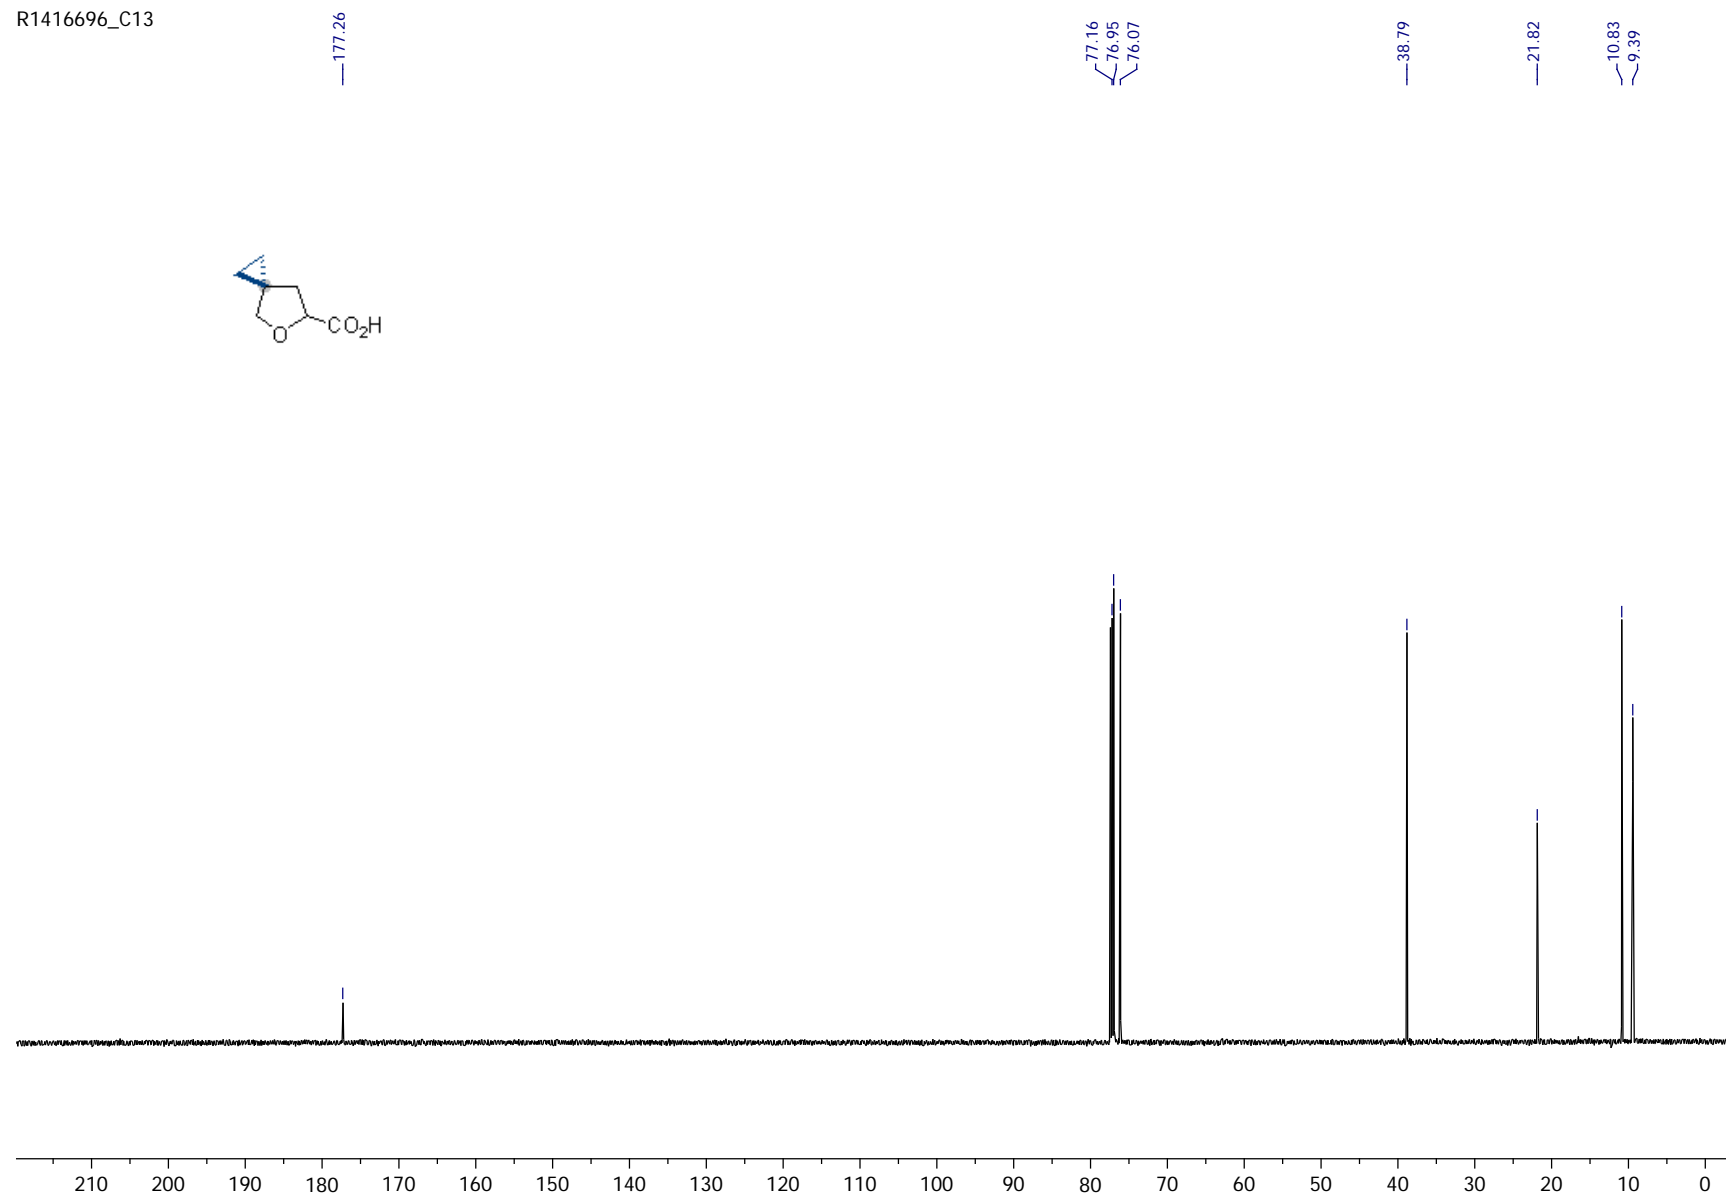

Compound 6d

R1383967

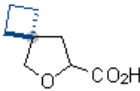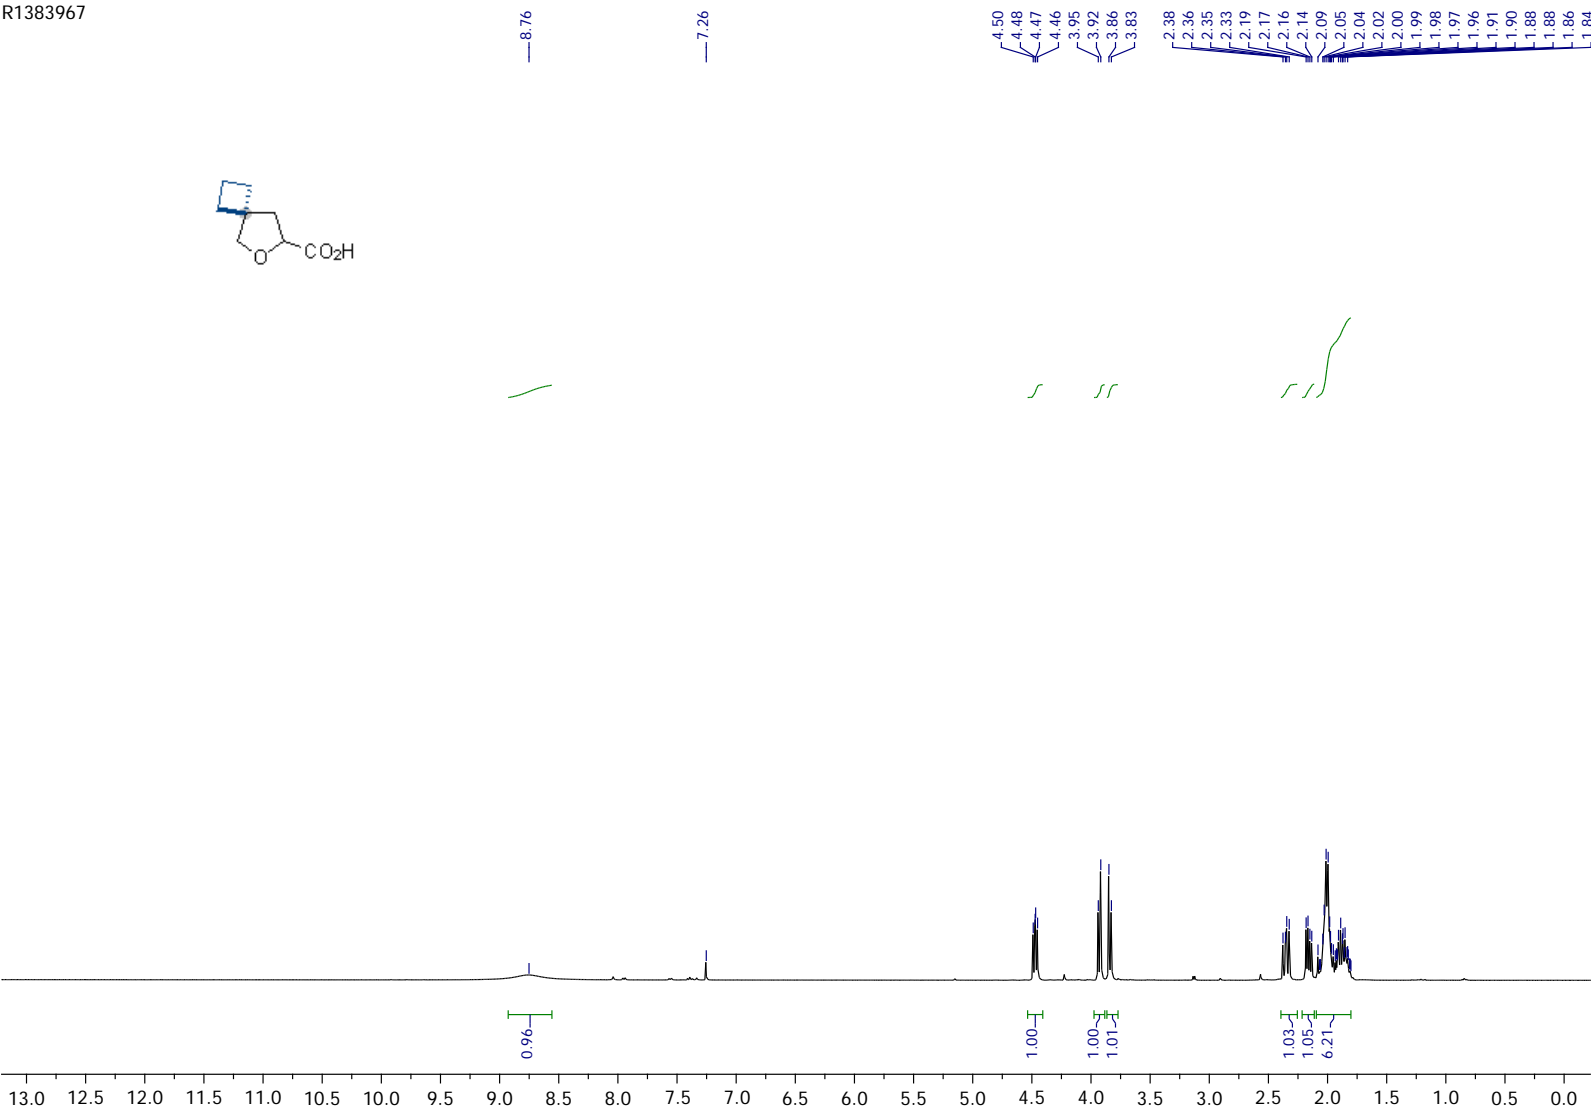

R1383967\_C13

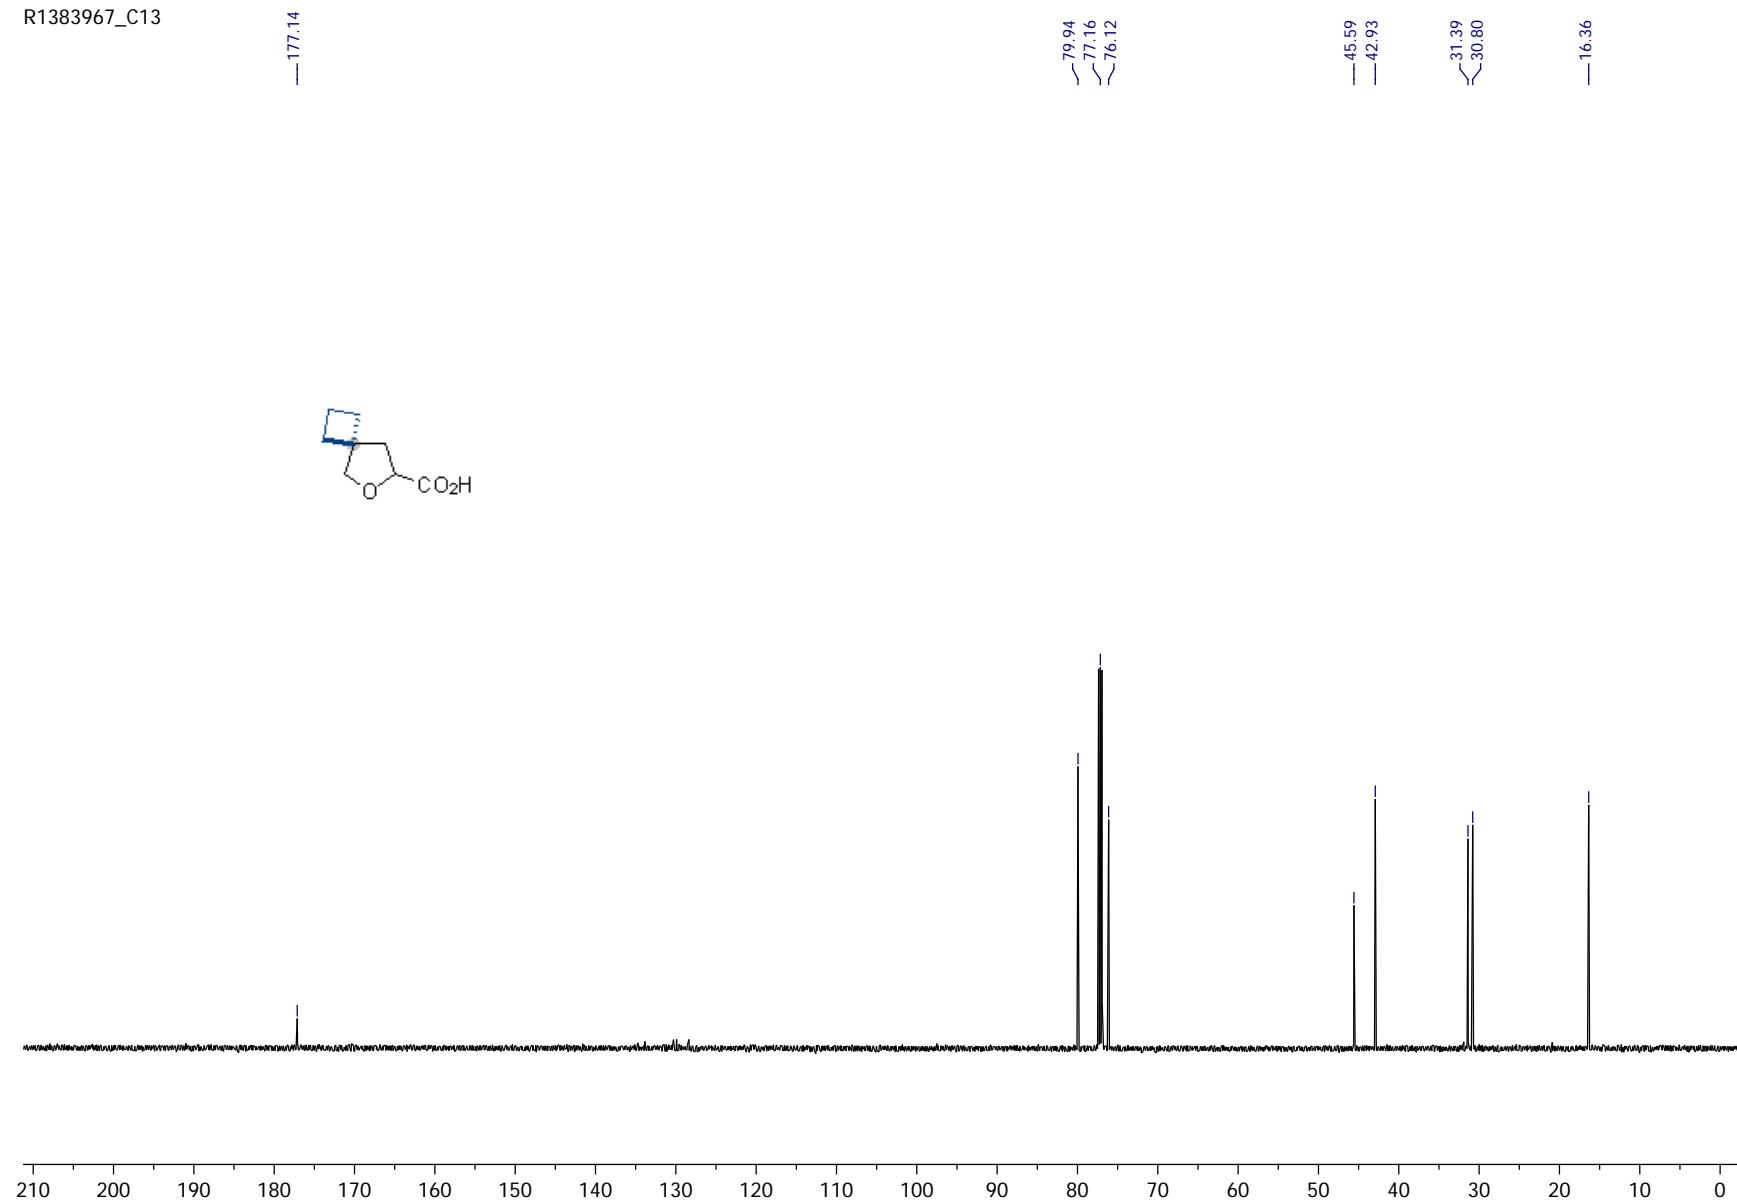

Compound 8d

R1723535

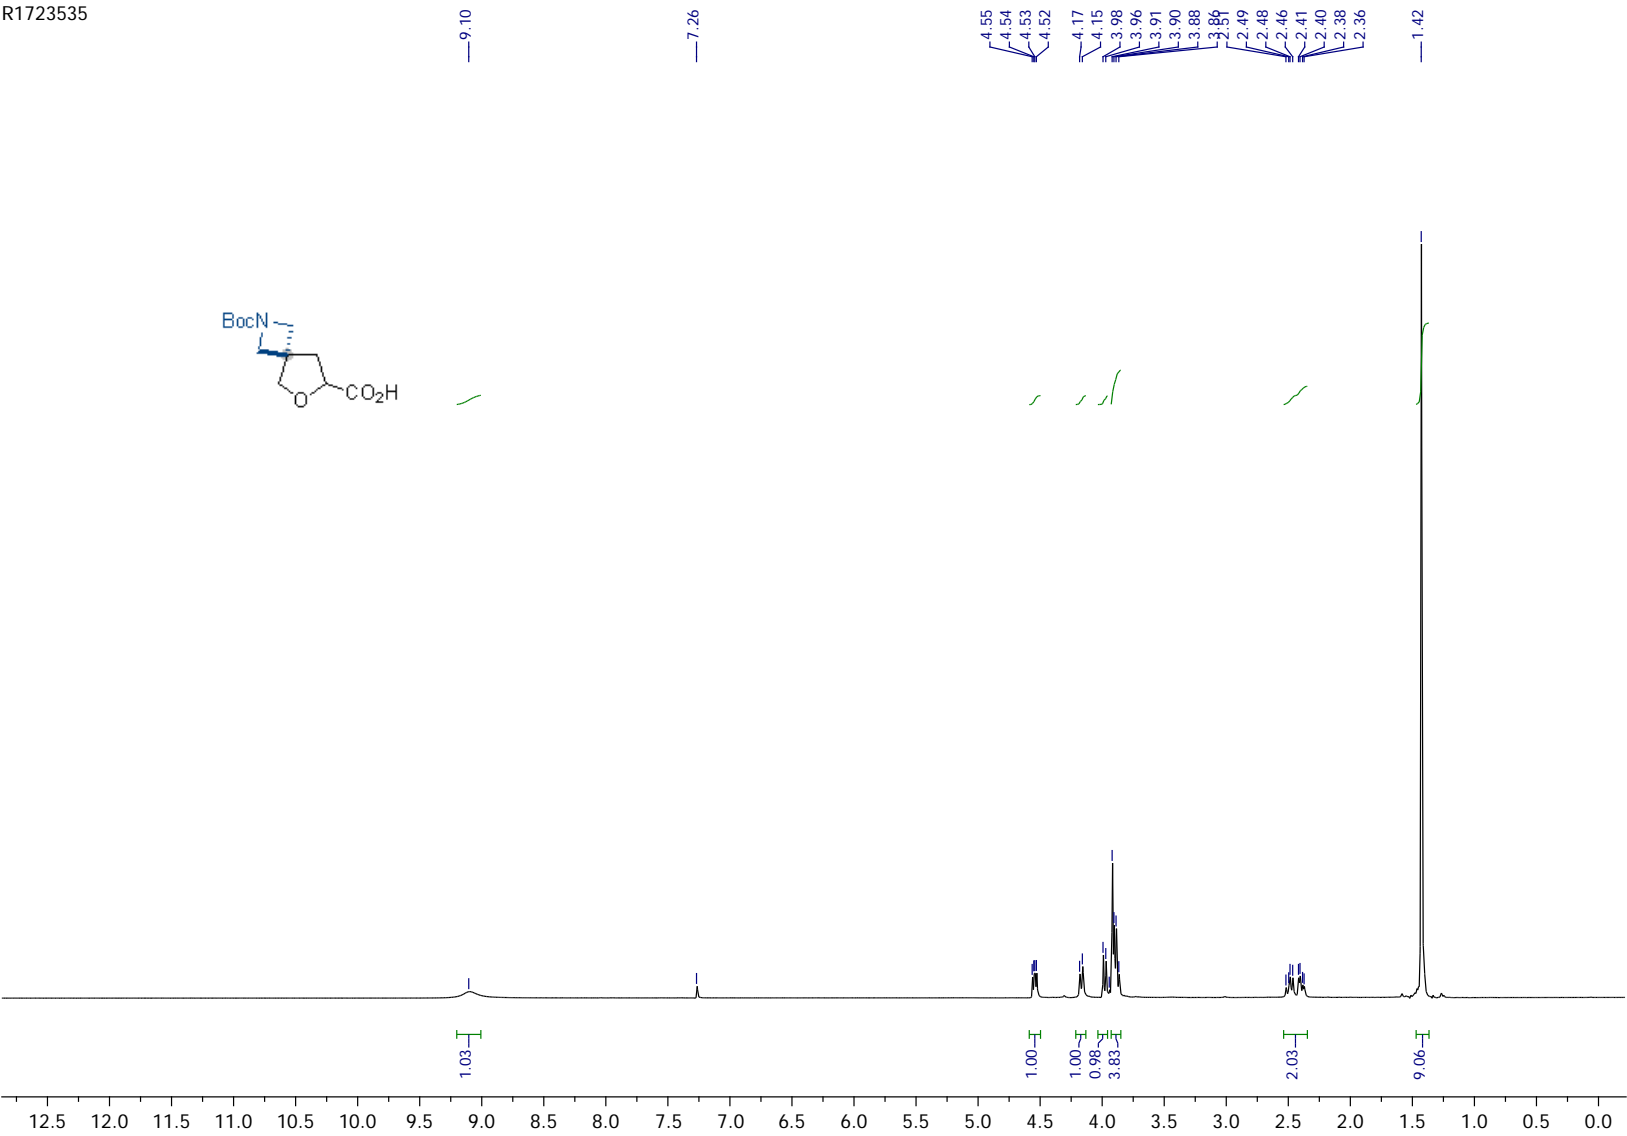

R1723535\_C13

175.67

156.55

80.61  
78.04  
77.16  
76.34

58.99  
57.95

41.29  
40.17

28.45

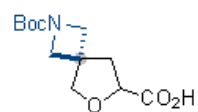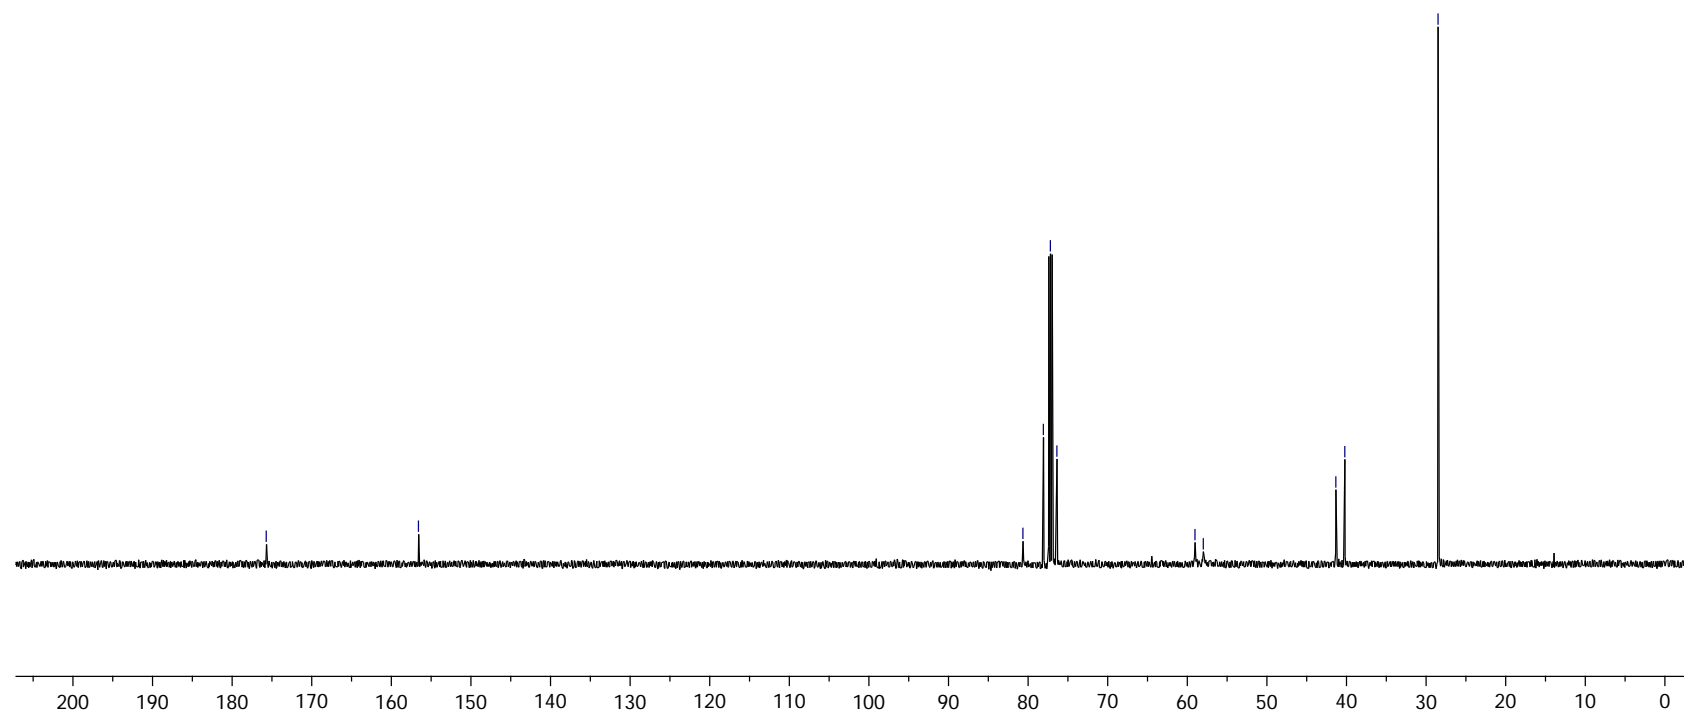

# Compound 9d

R1395300

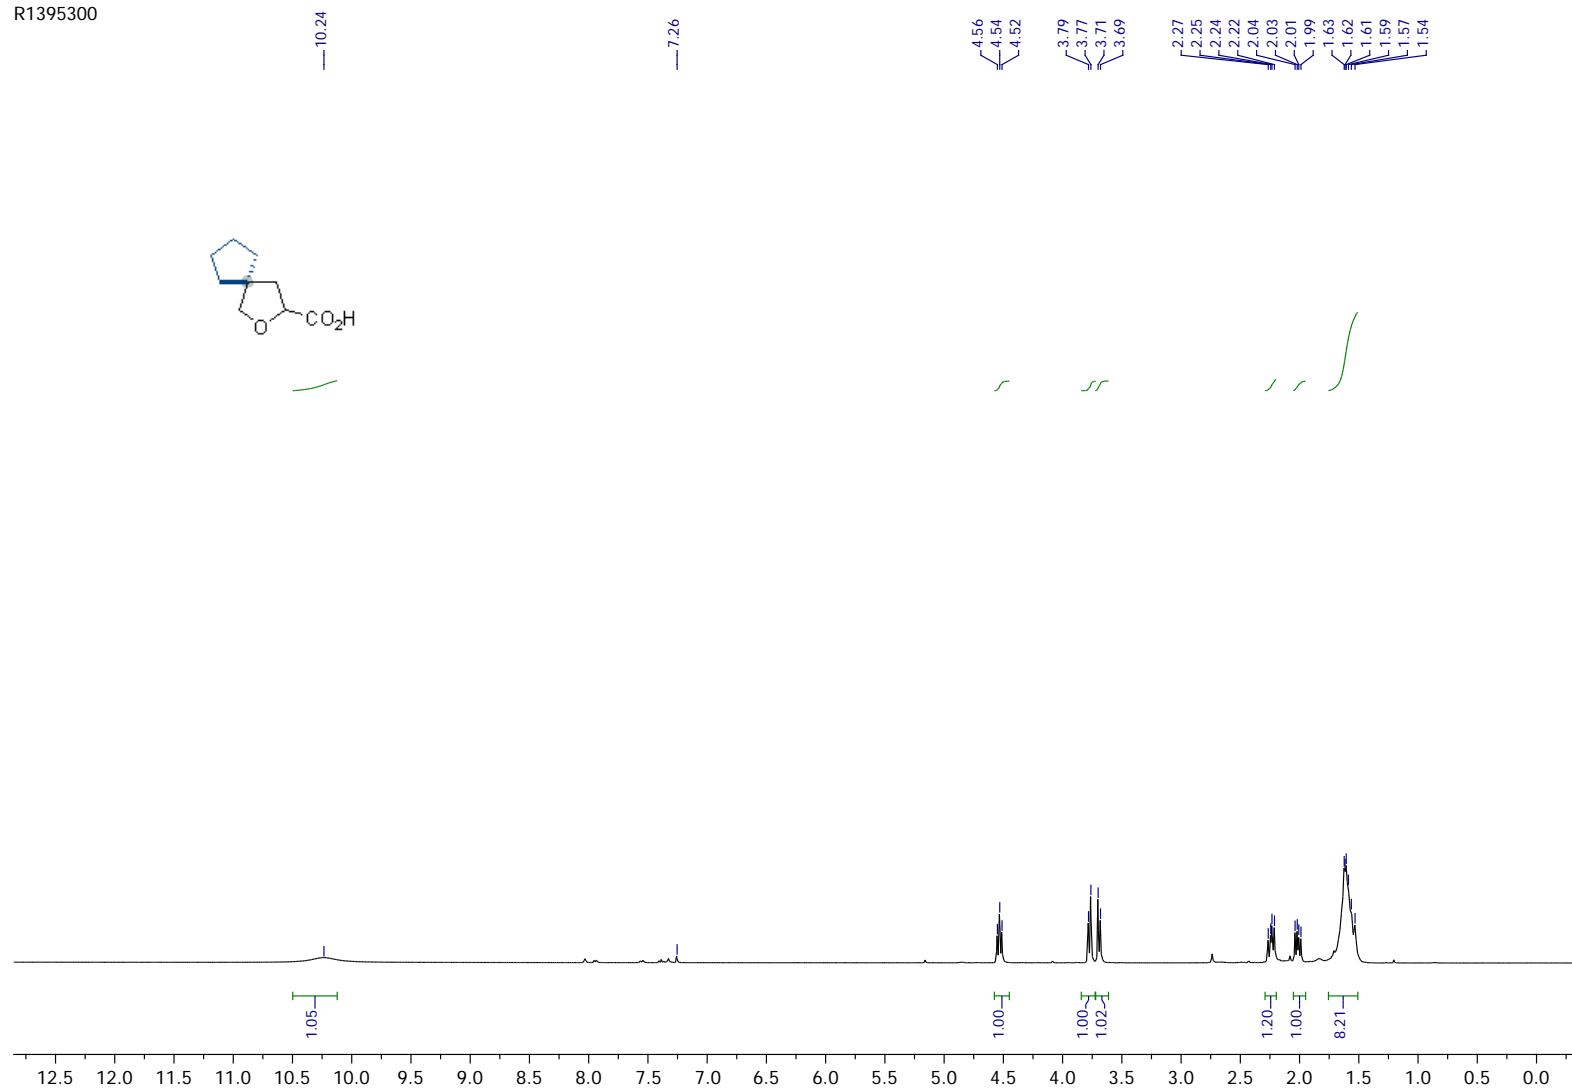



R1395300\_13C

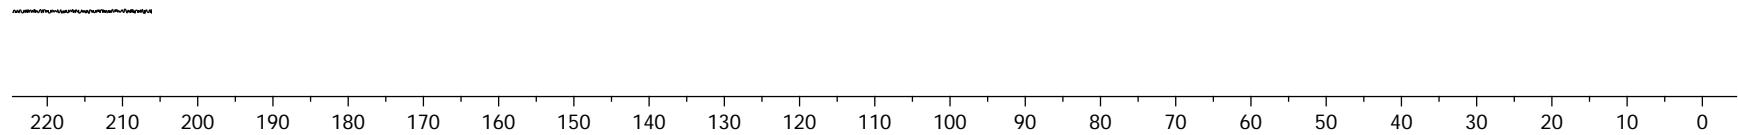

# Compound 11d

R1797804

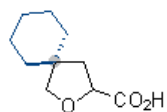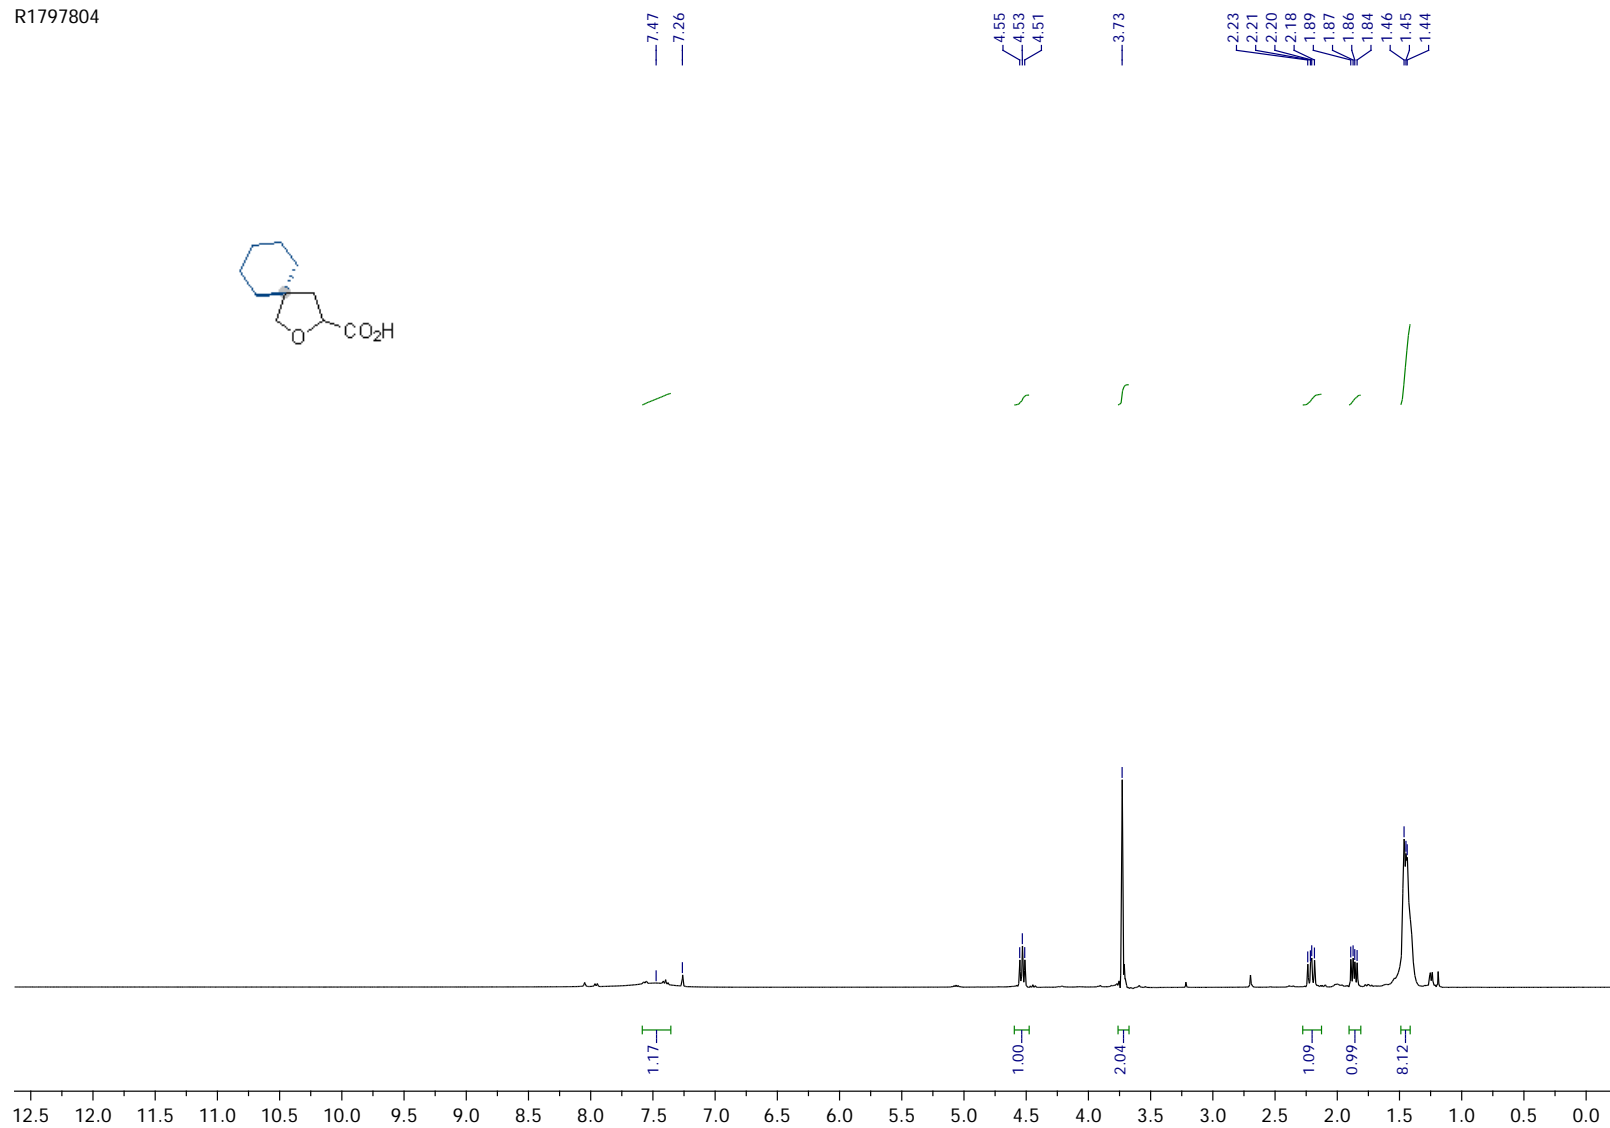

R1797804\_C13

— 177.51

79.43  
77.16  
76.13

— 43.91

35.33  
34.91

25.97  
24.03  
23.58

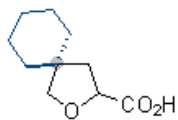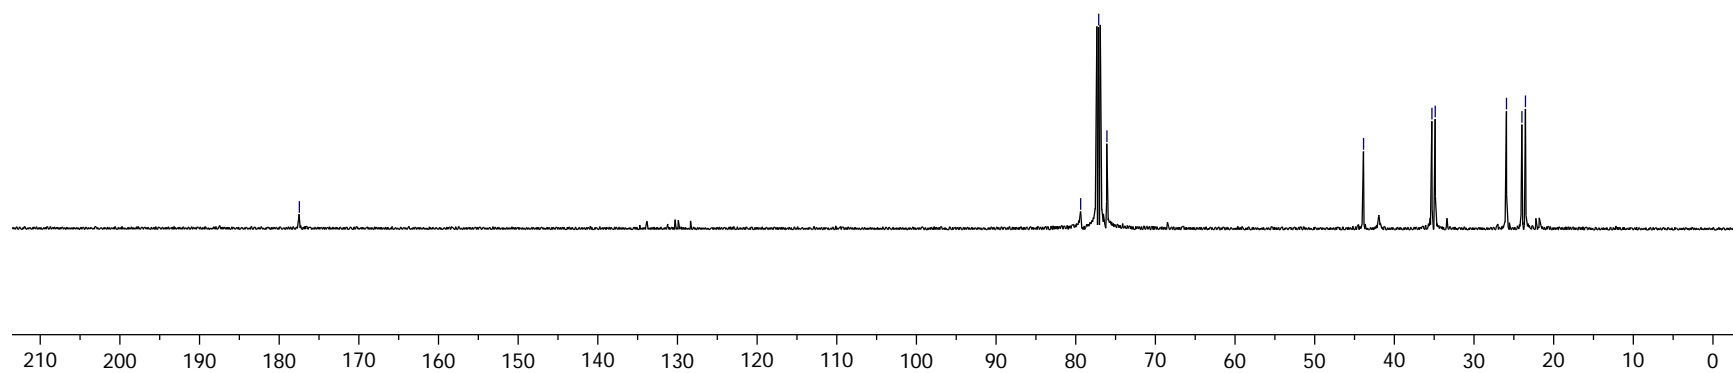

Compound 12d

R1780820

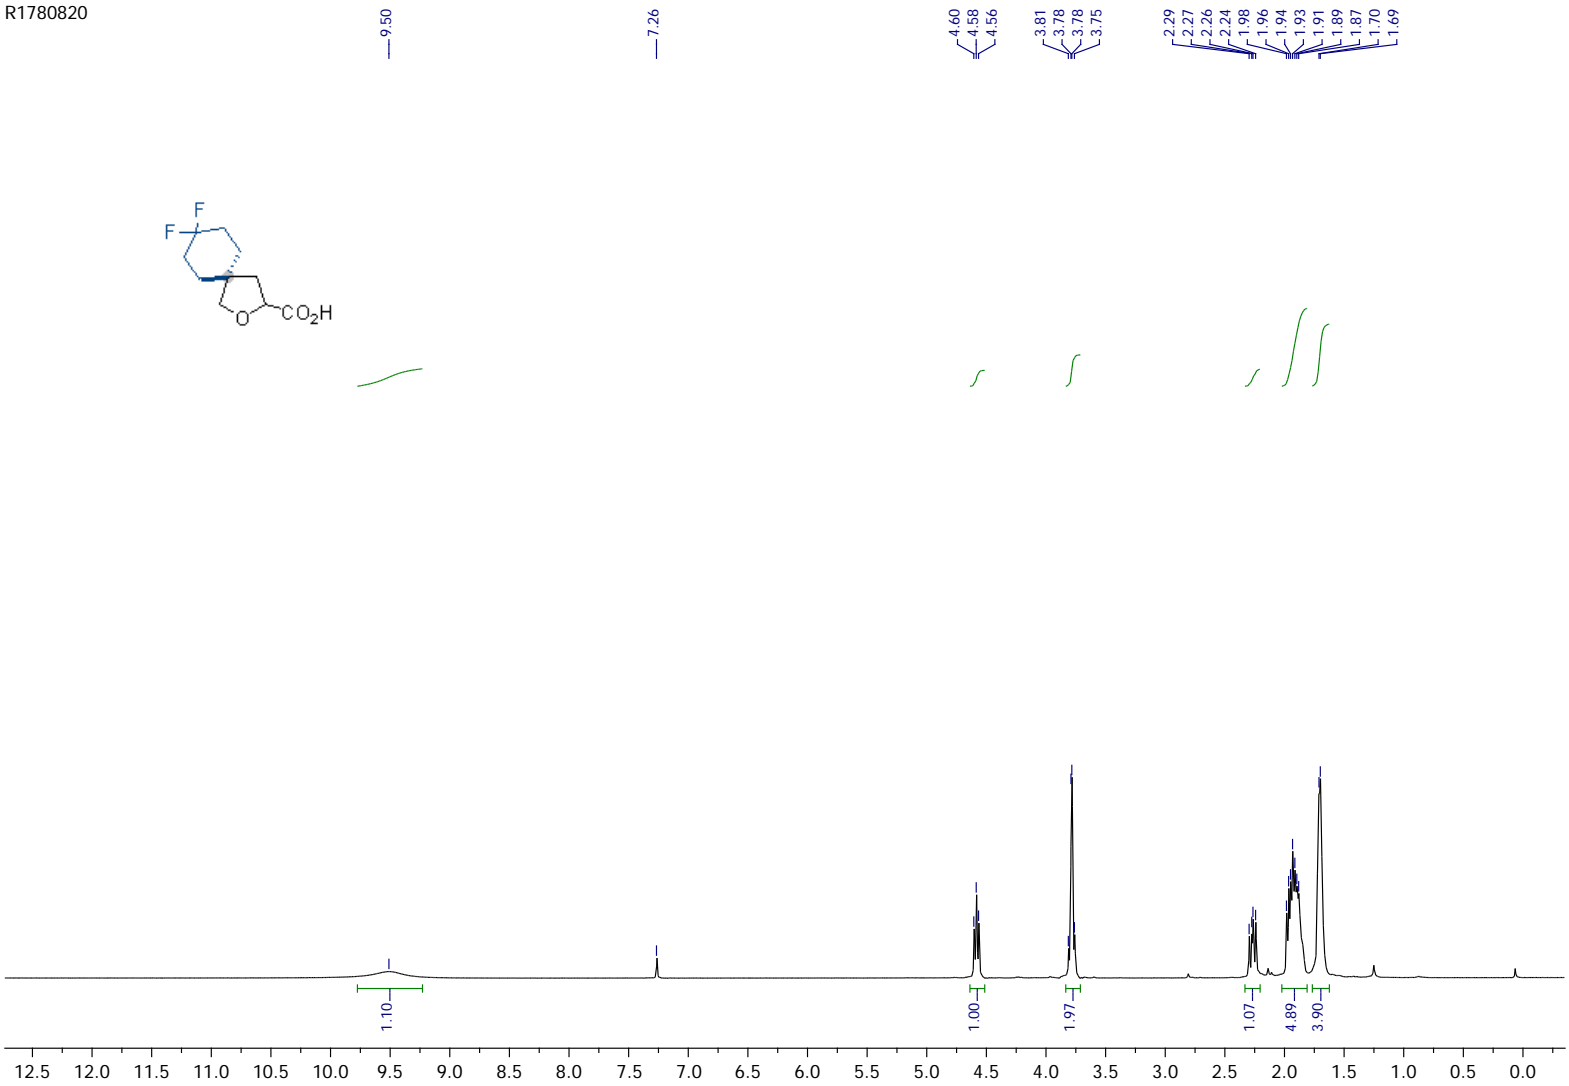

R1780820\_C13

|||||

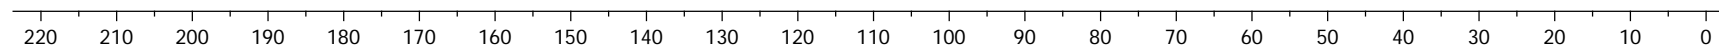

Compound 13d

R1401051

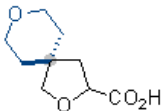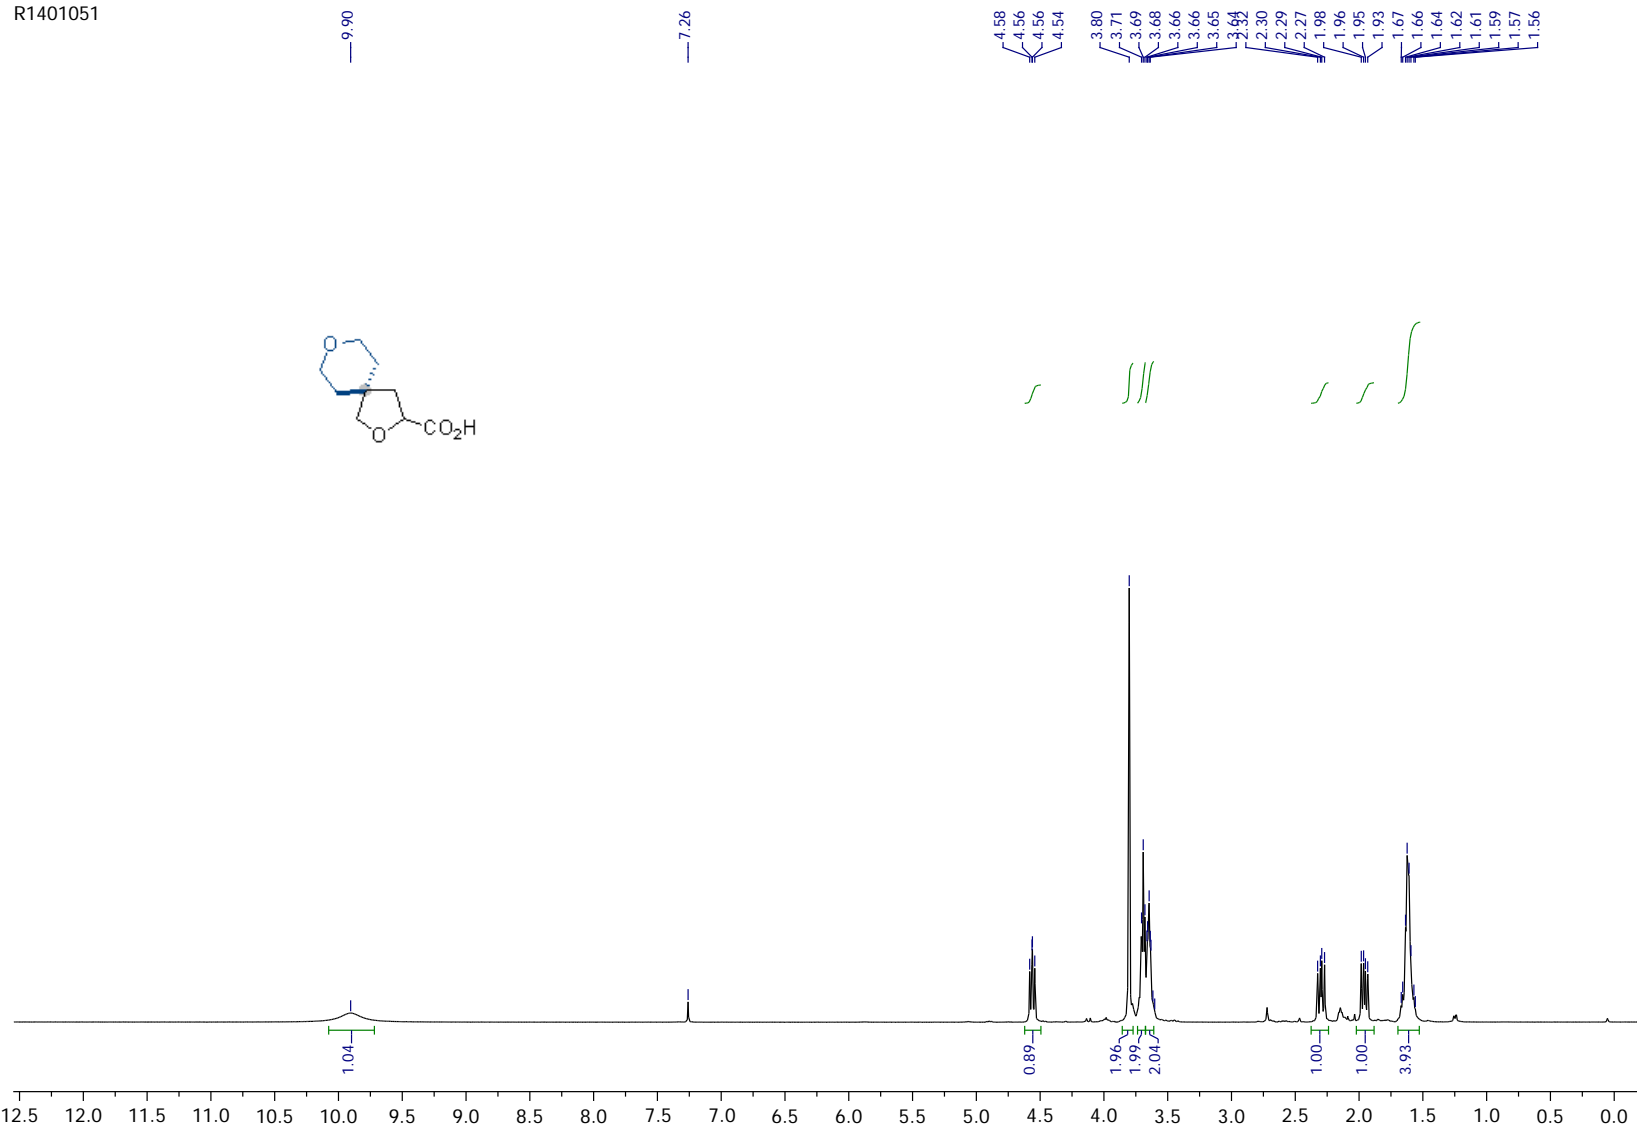

R1401051\_C13

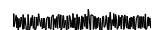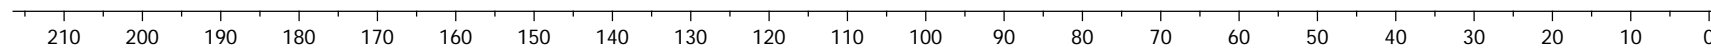

# Compound 18d

R1383825

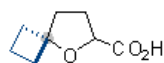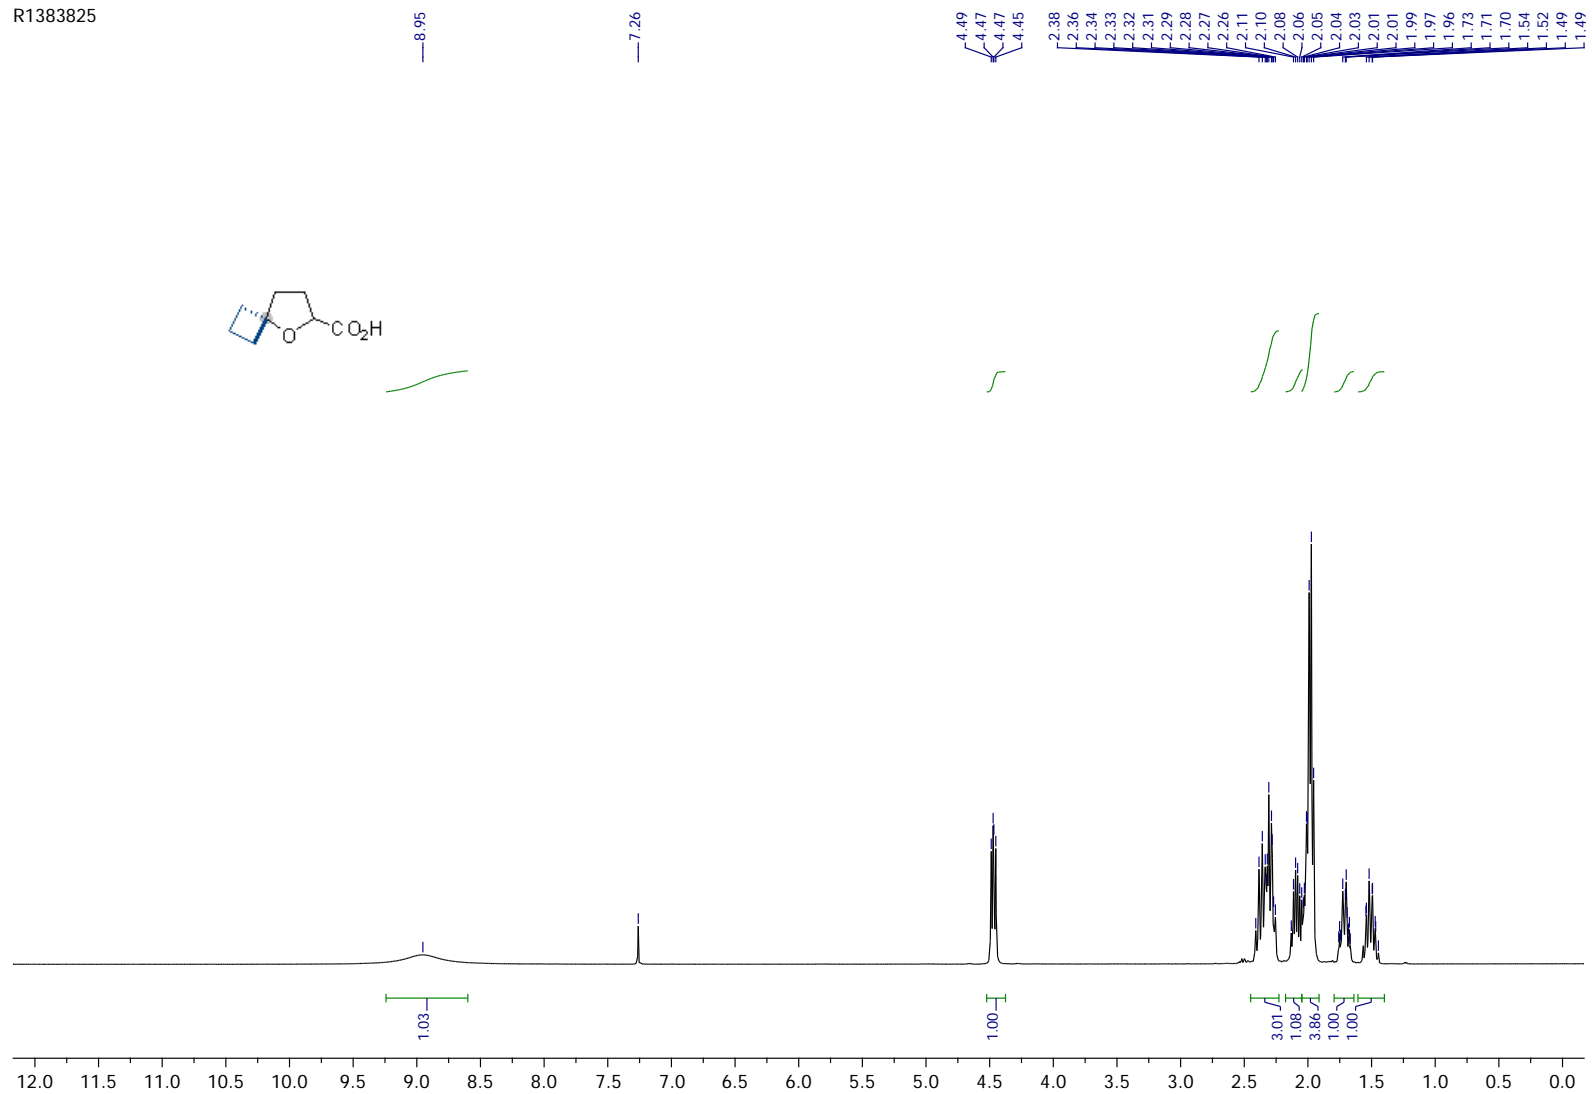



R1383825\_C13

—177.09

—85.75

77.16  
76.39

35.73  
35.29

—29.42

—12.62

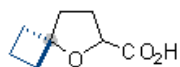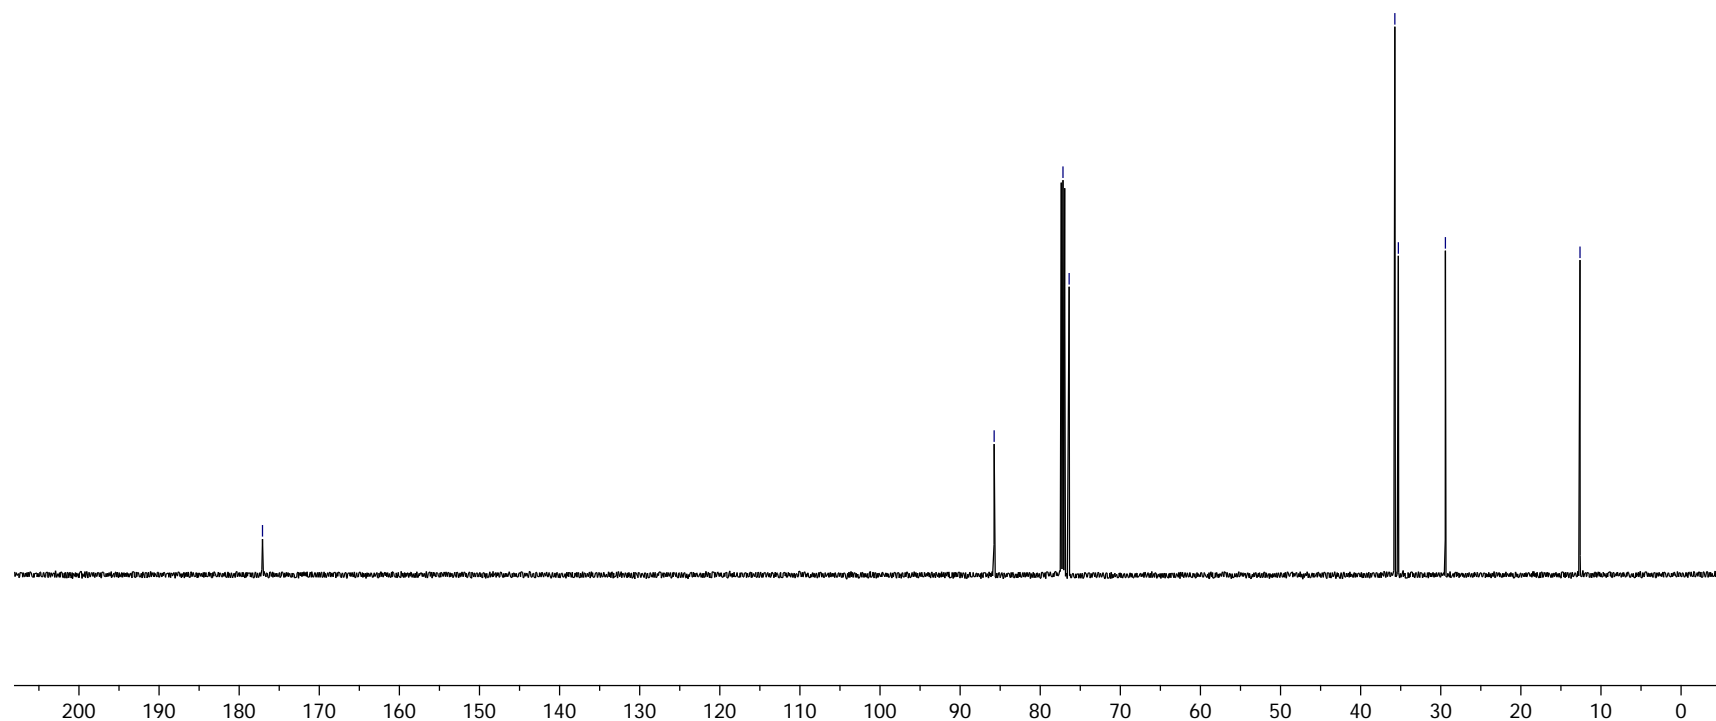

# Compound 21d

R1746963

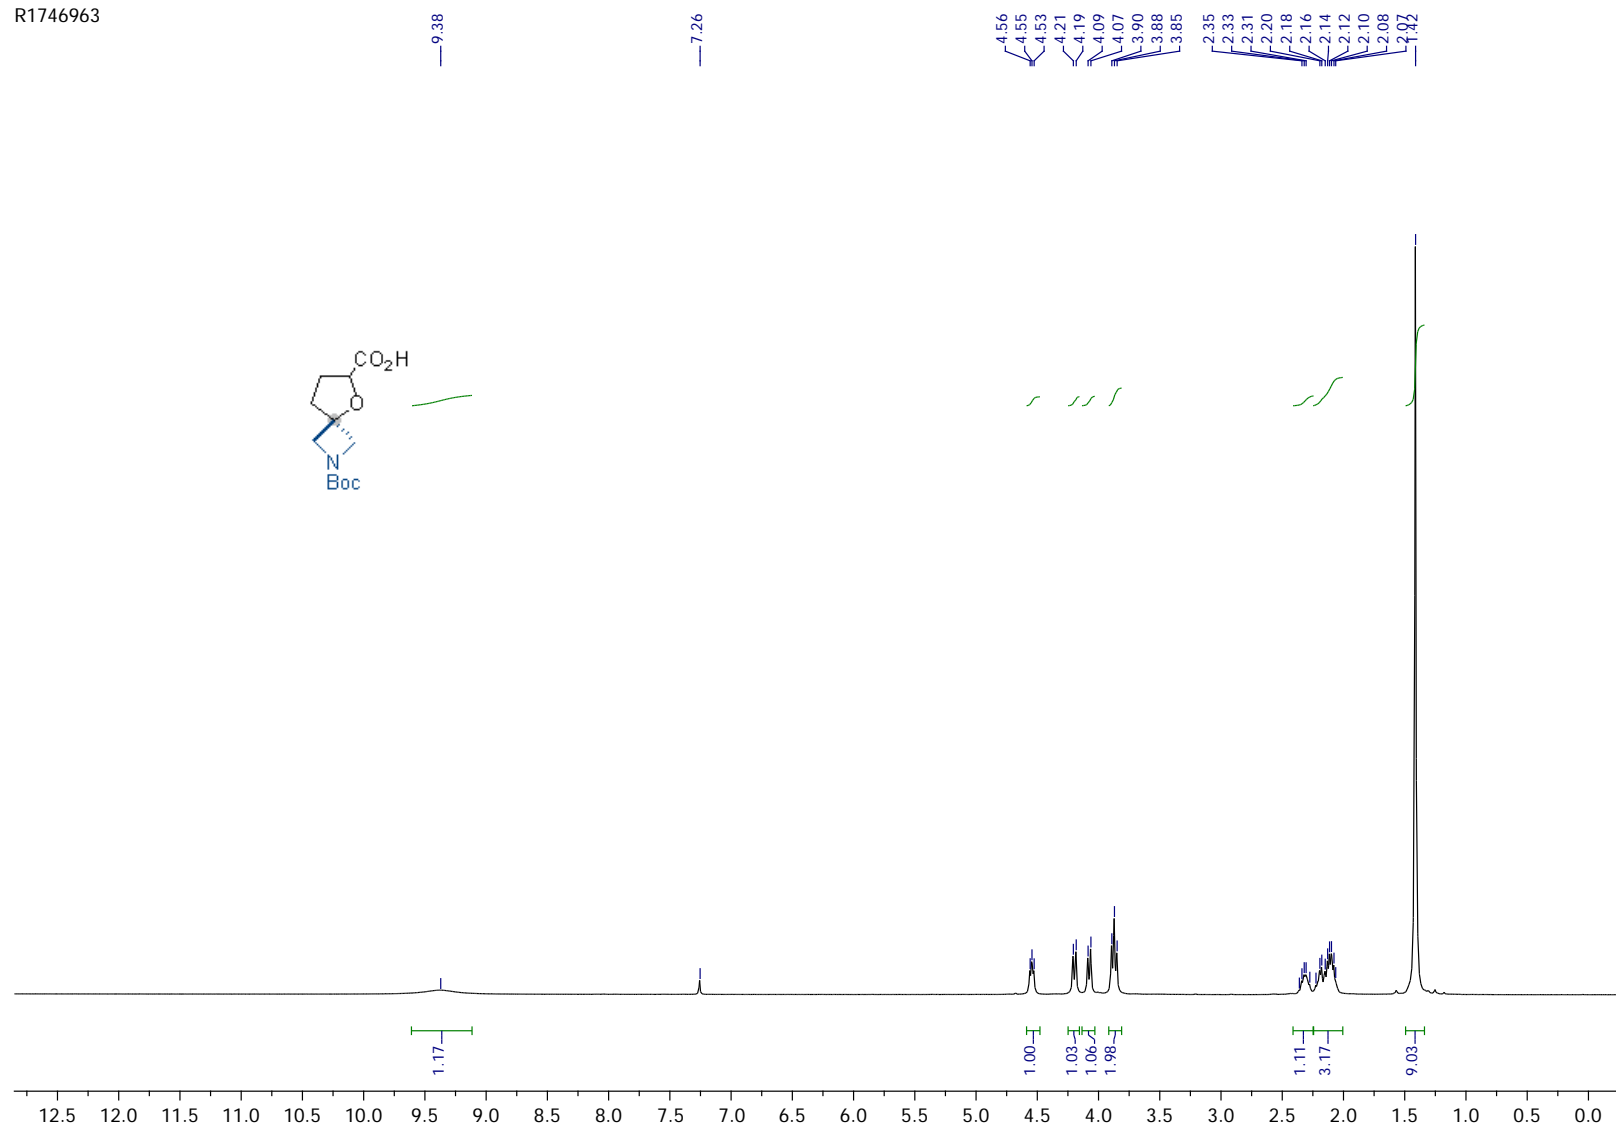

R1746963\_C13

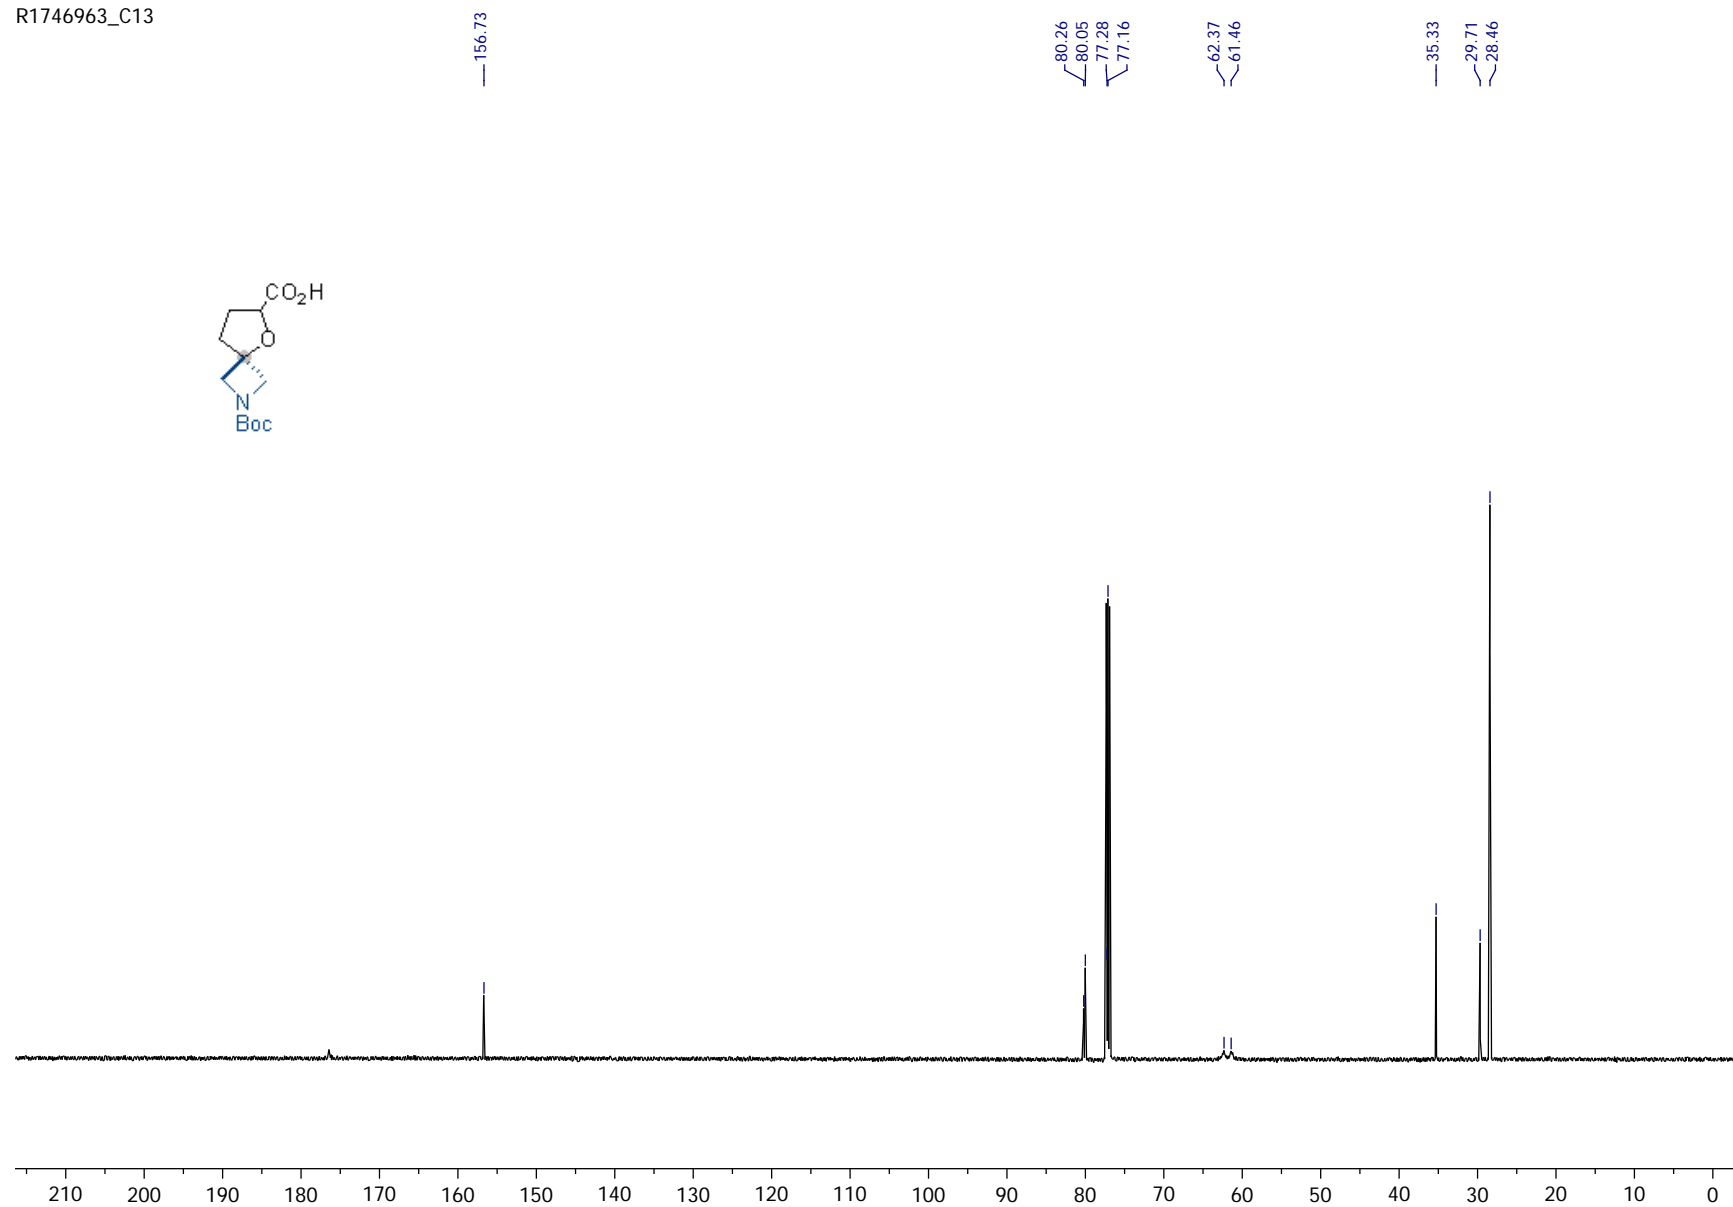

# Compound 23d

R1444678

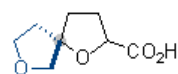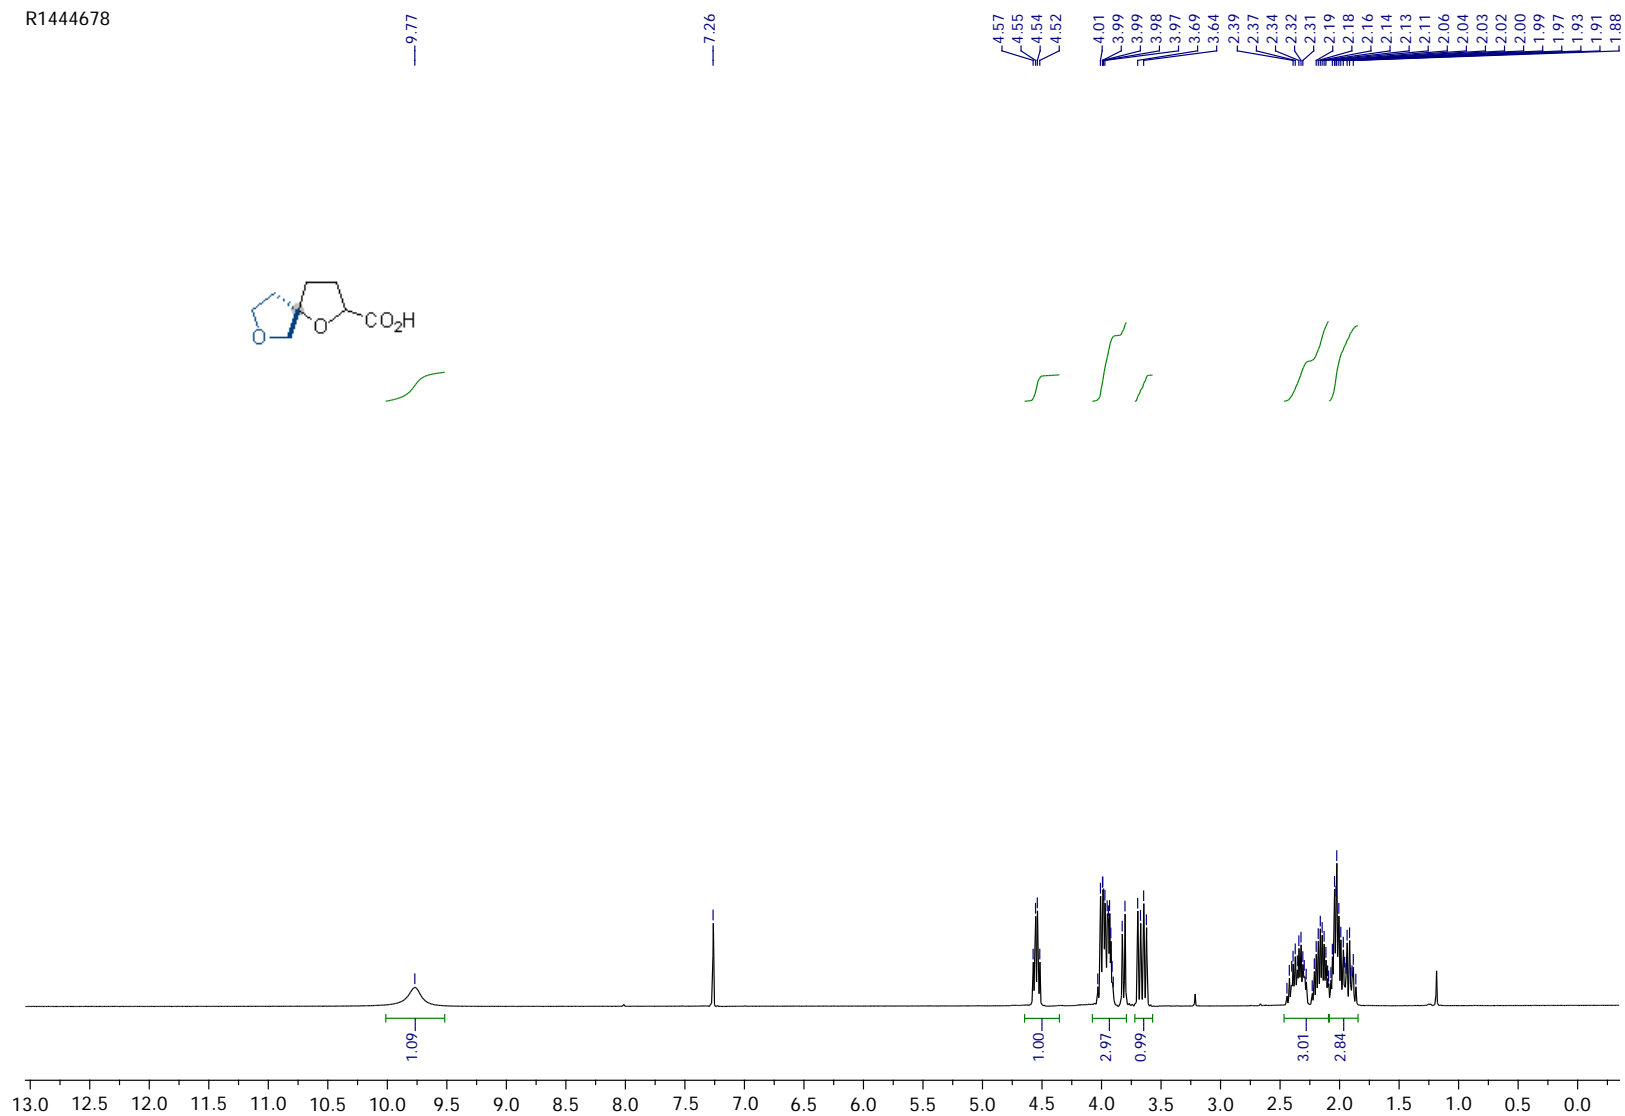

R1444678\_C13

|||||

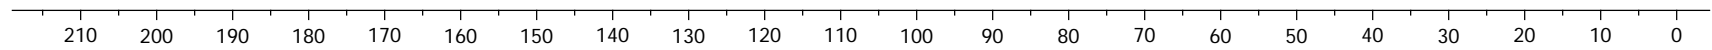

Compound 27d

R1383723

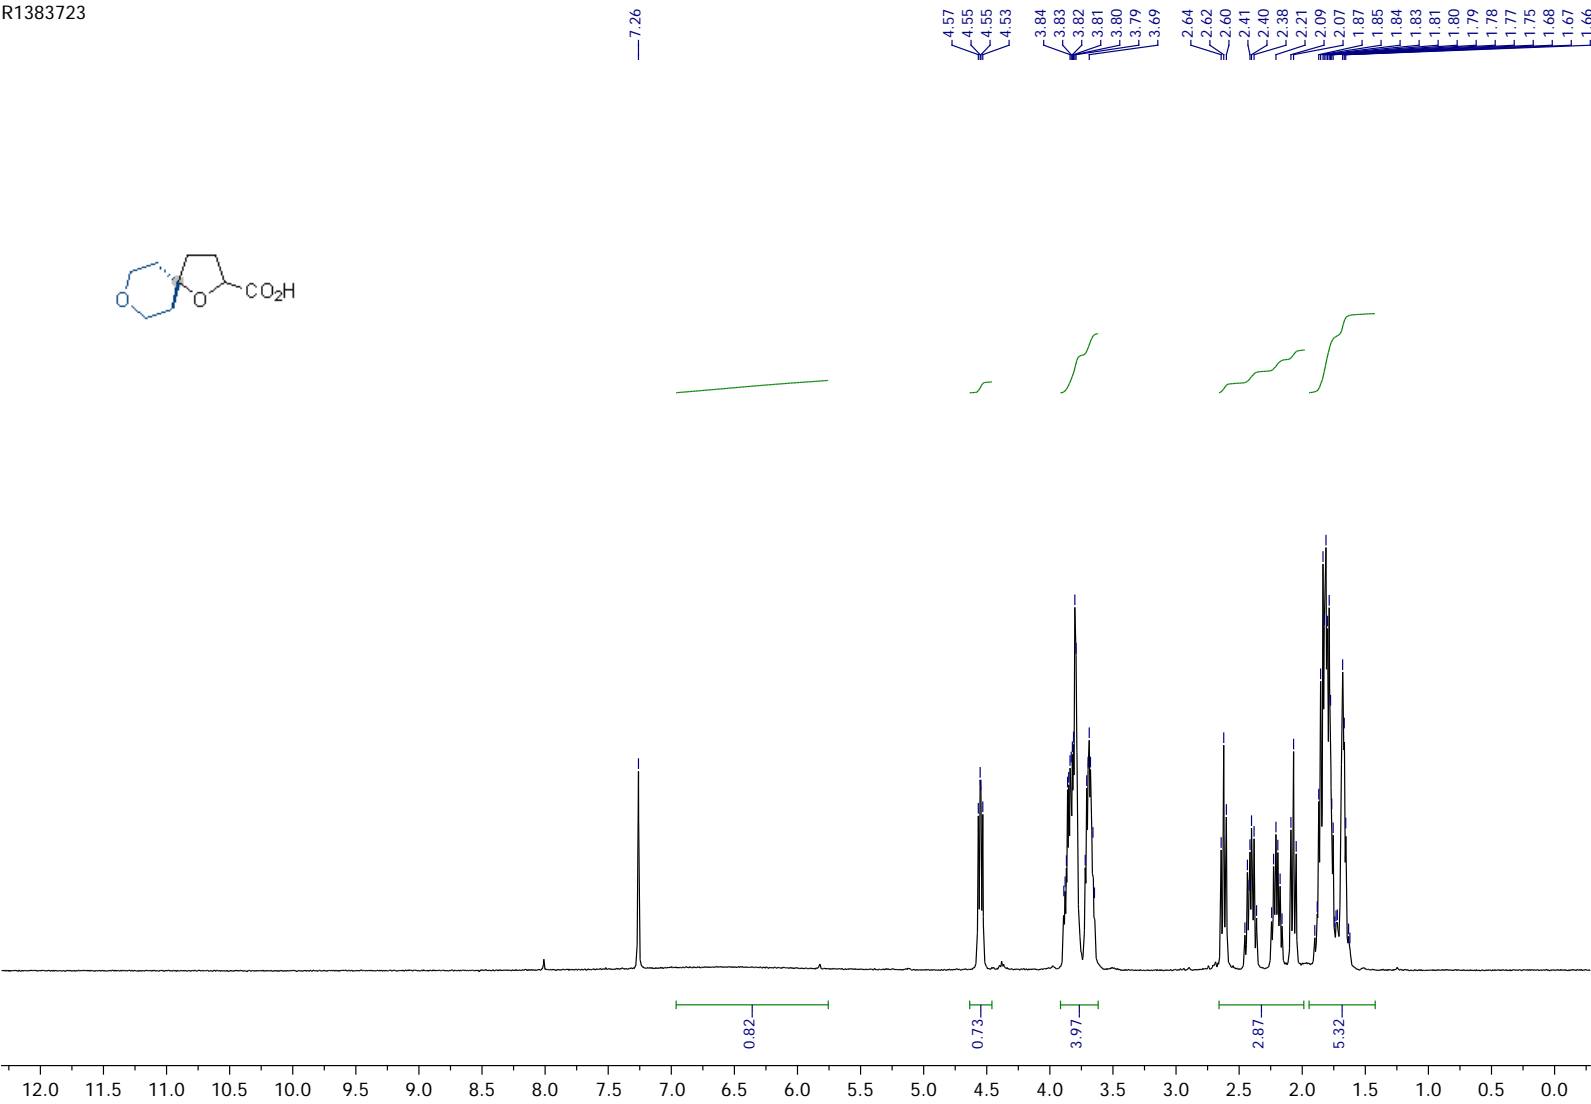

R1383723\_C13

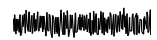

210 200 190 180 170 160 150 140 130 120 110 100 90 80 70 60 50 40 30 20 10 0

Compound 34d

R1692960

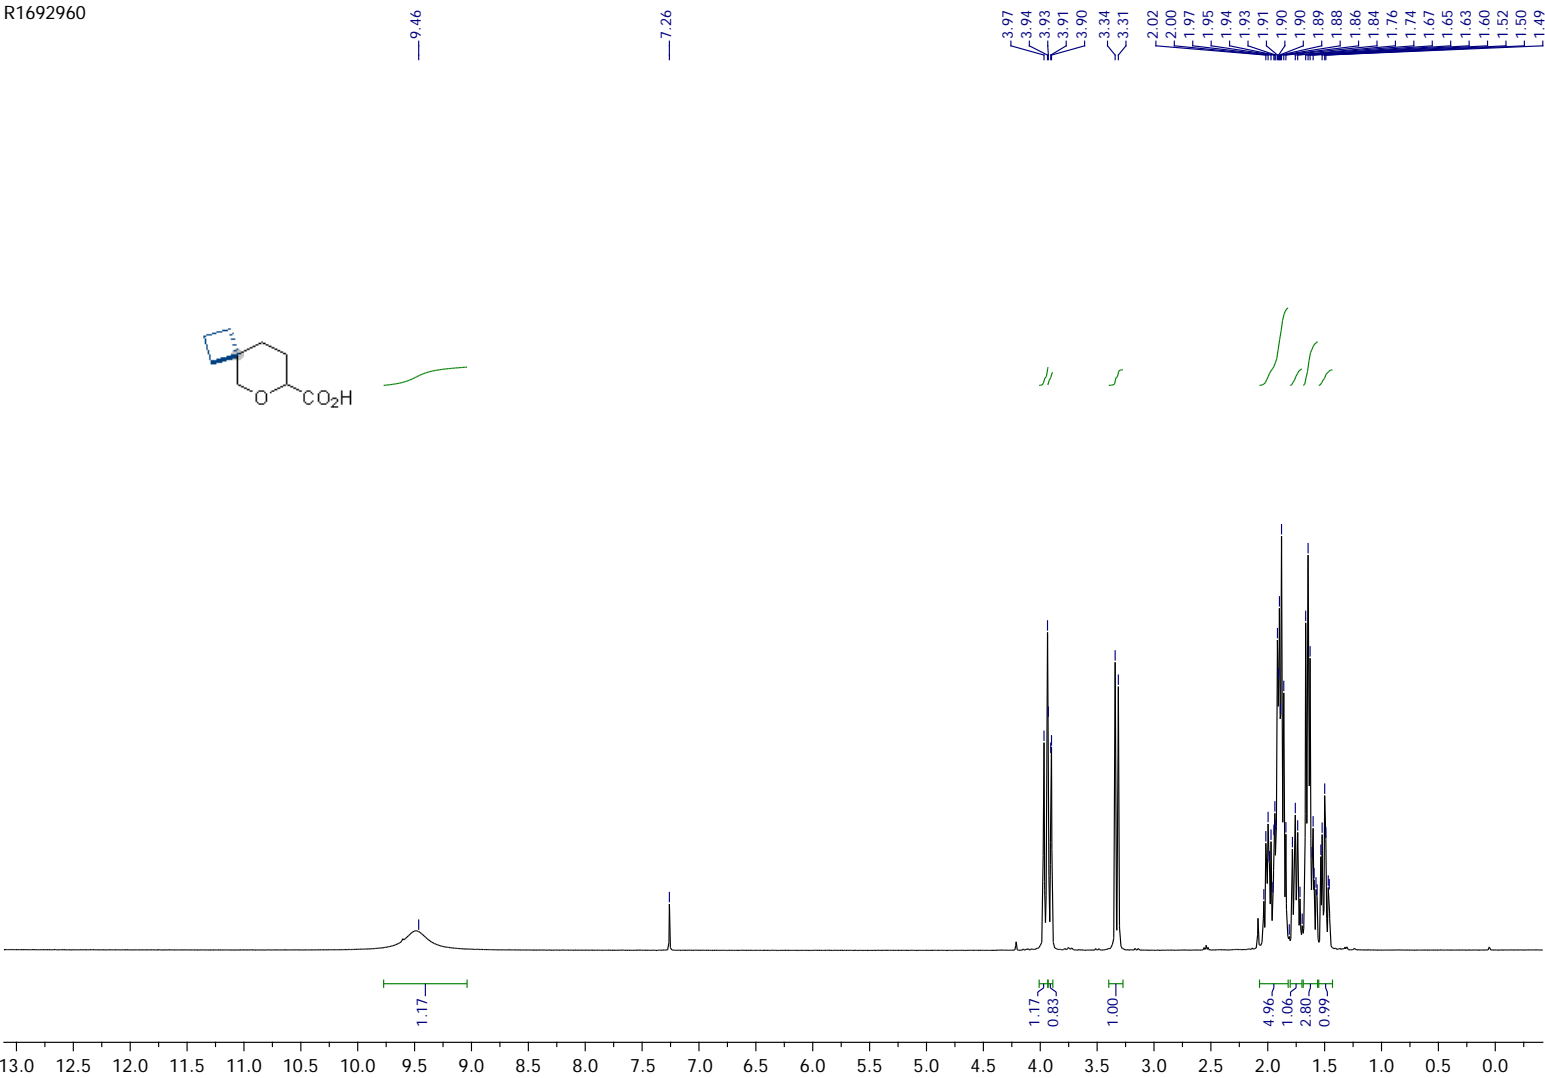



R1692960\_13C

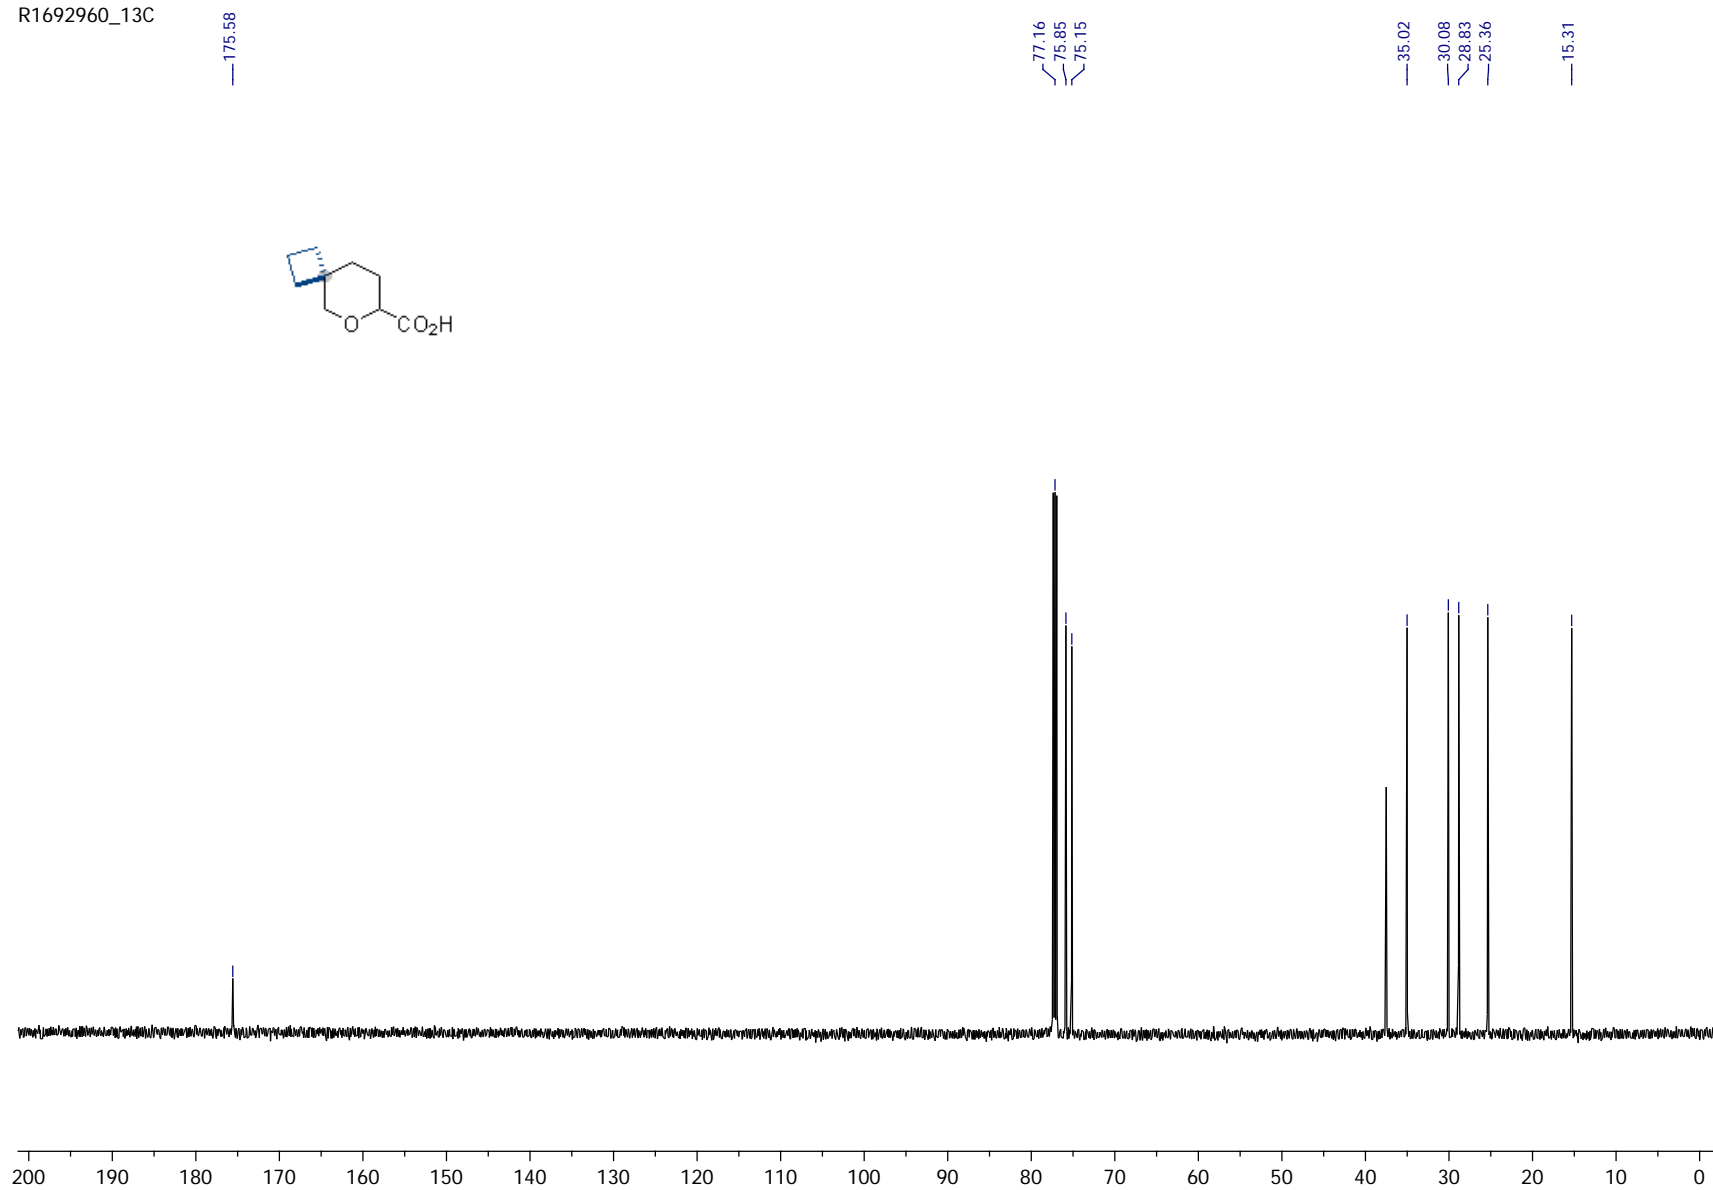

# Compound 35d

R2383543

12.62

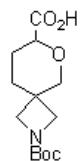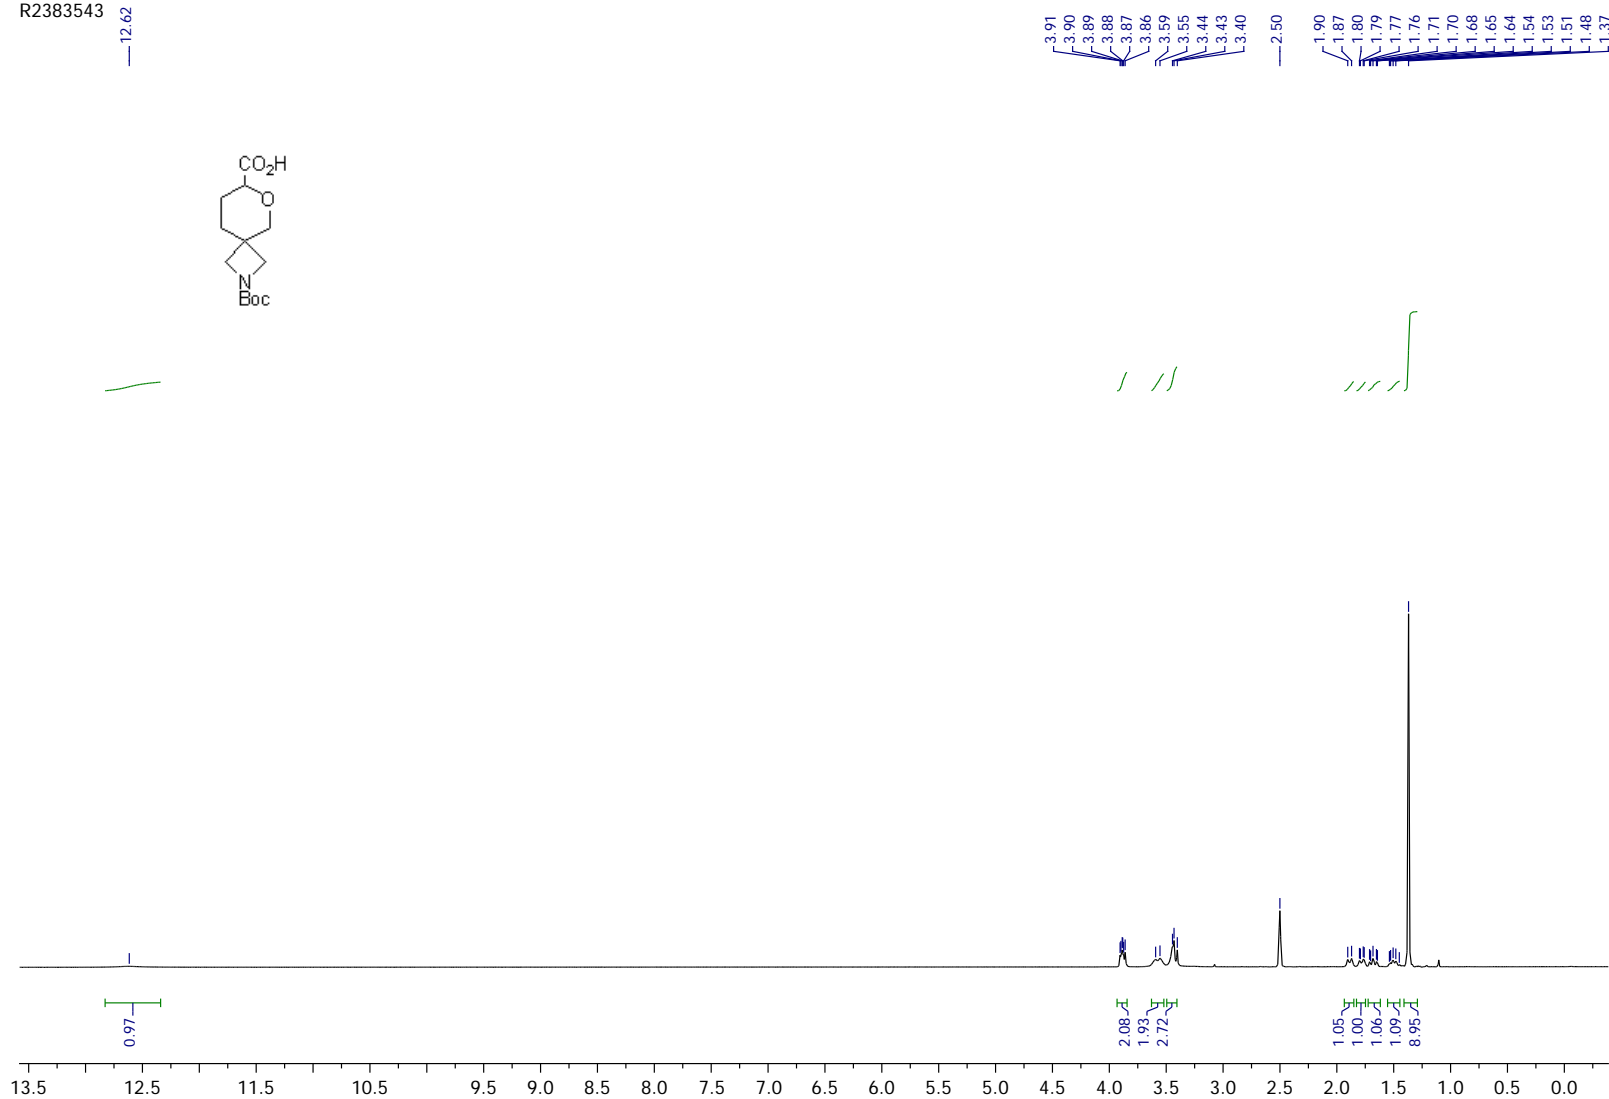

R2383543\_C13

— 172.04

— 155.59

— 78.45  
— 74.12  
— 72.29

— 39.52

— 32.82  
— 31.38  
— 28.05  
— 25.00

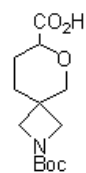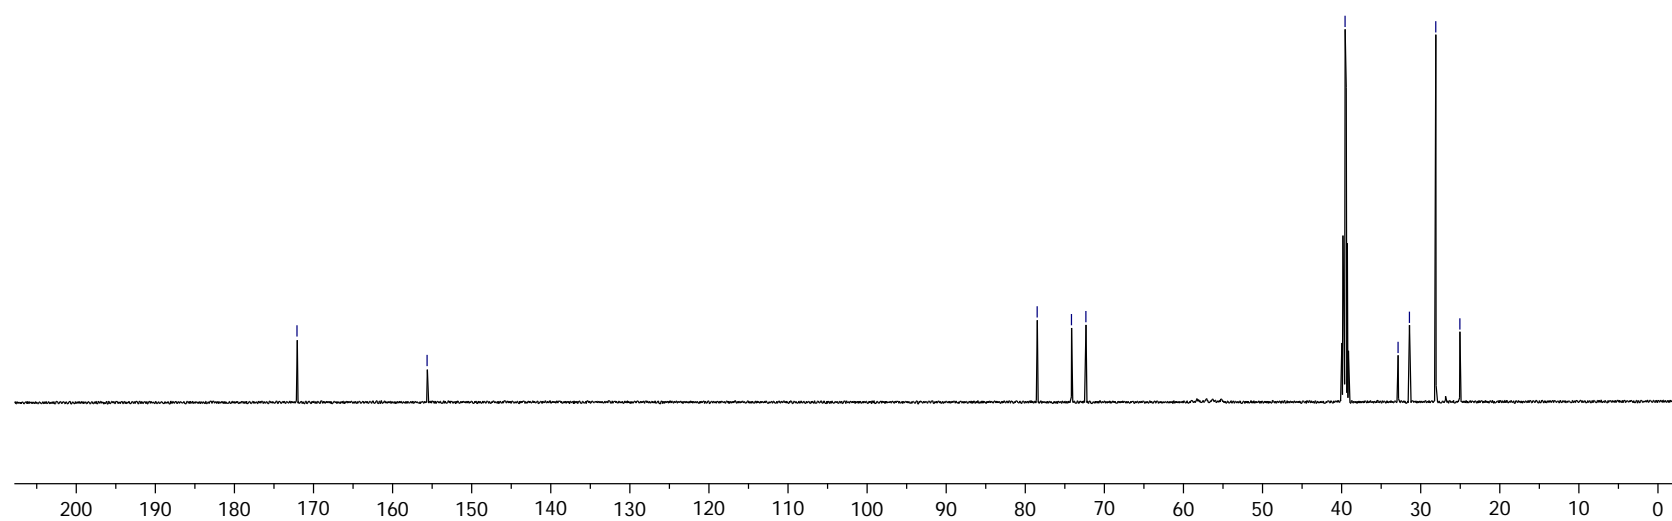

Compound 36d

R1669504

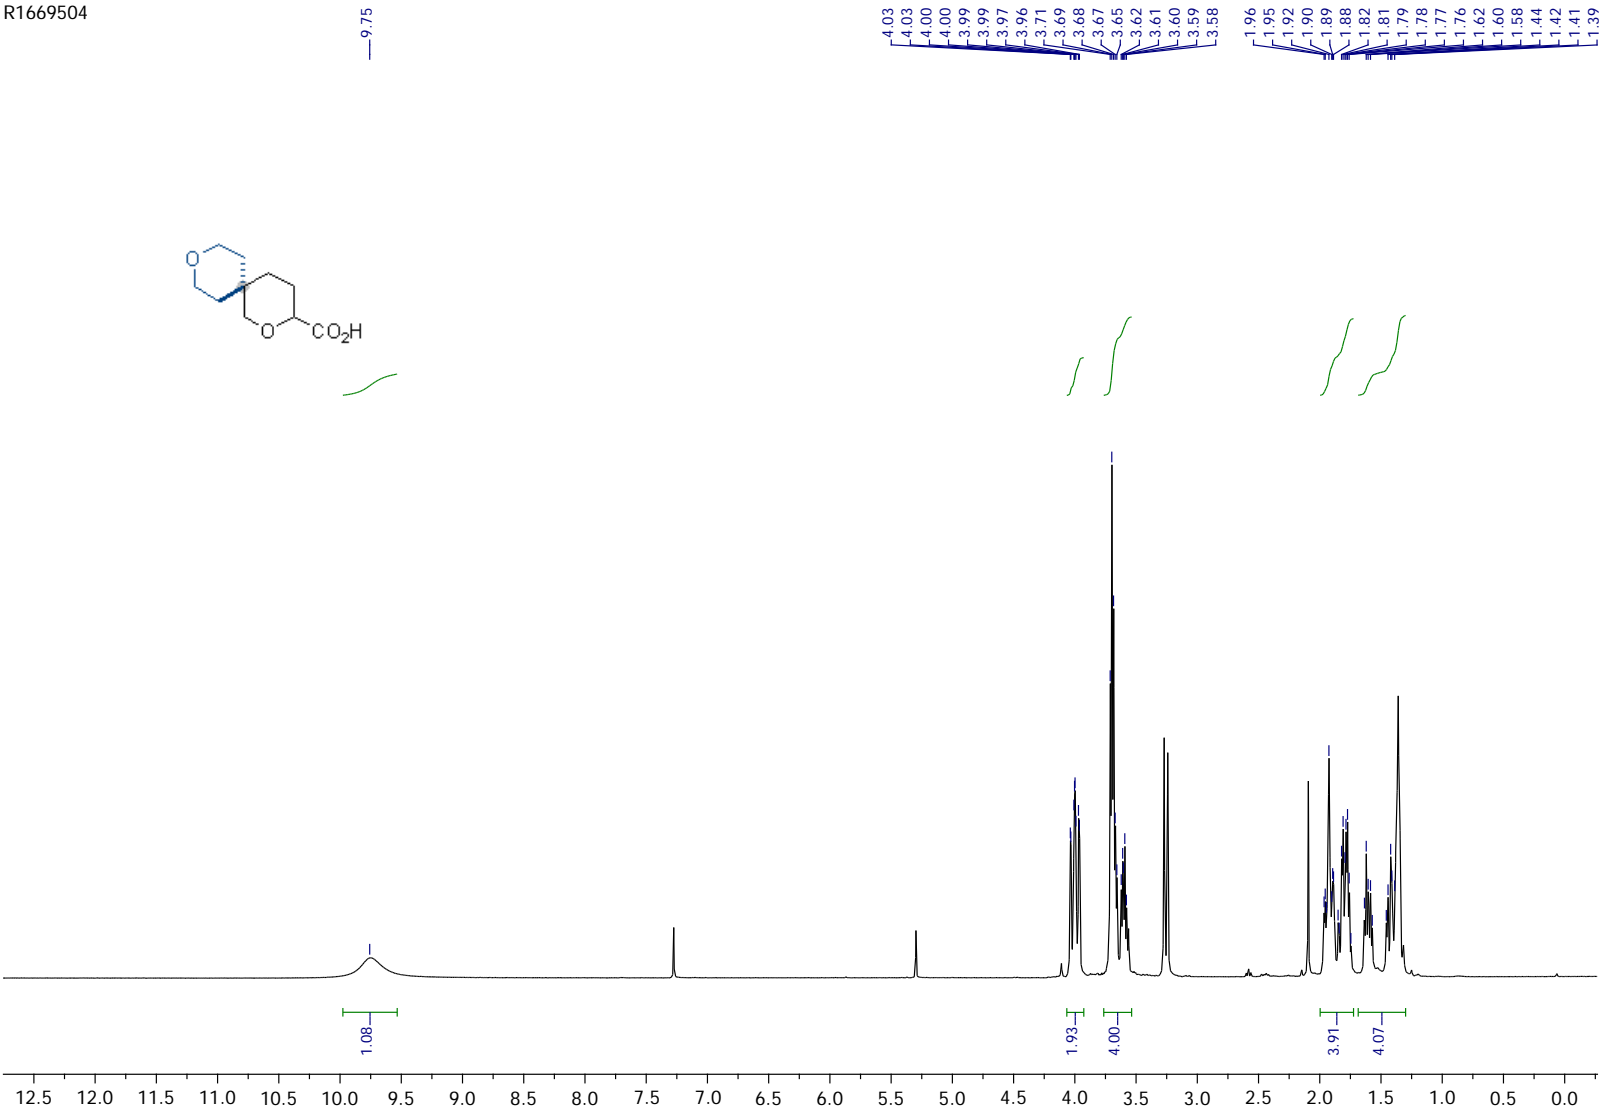

R1669504\_13C

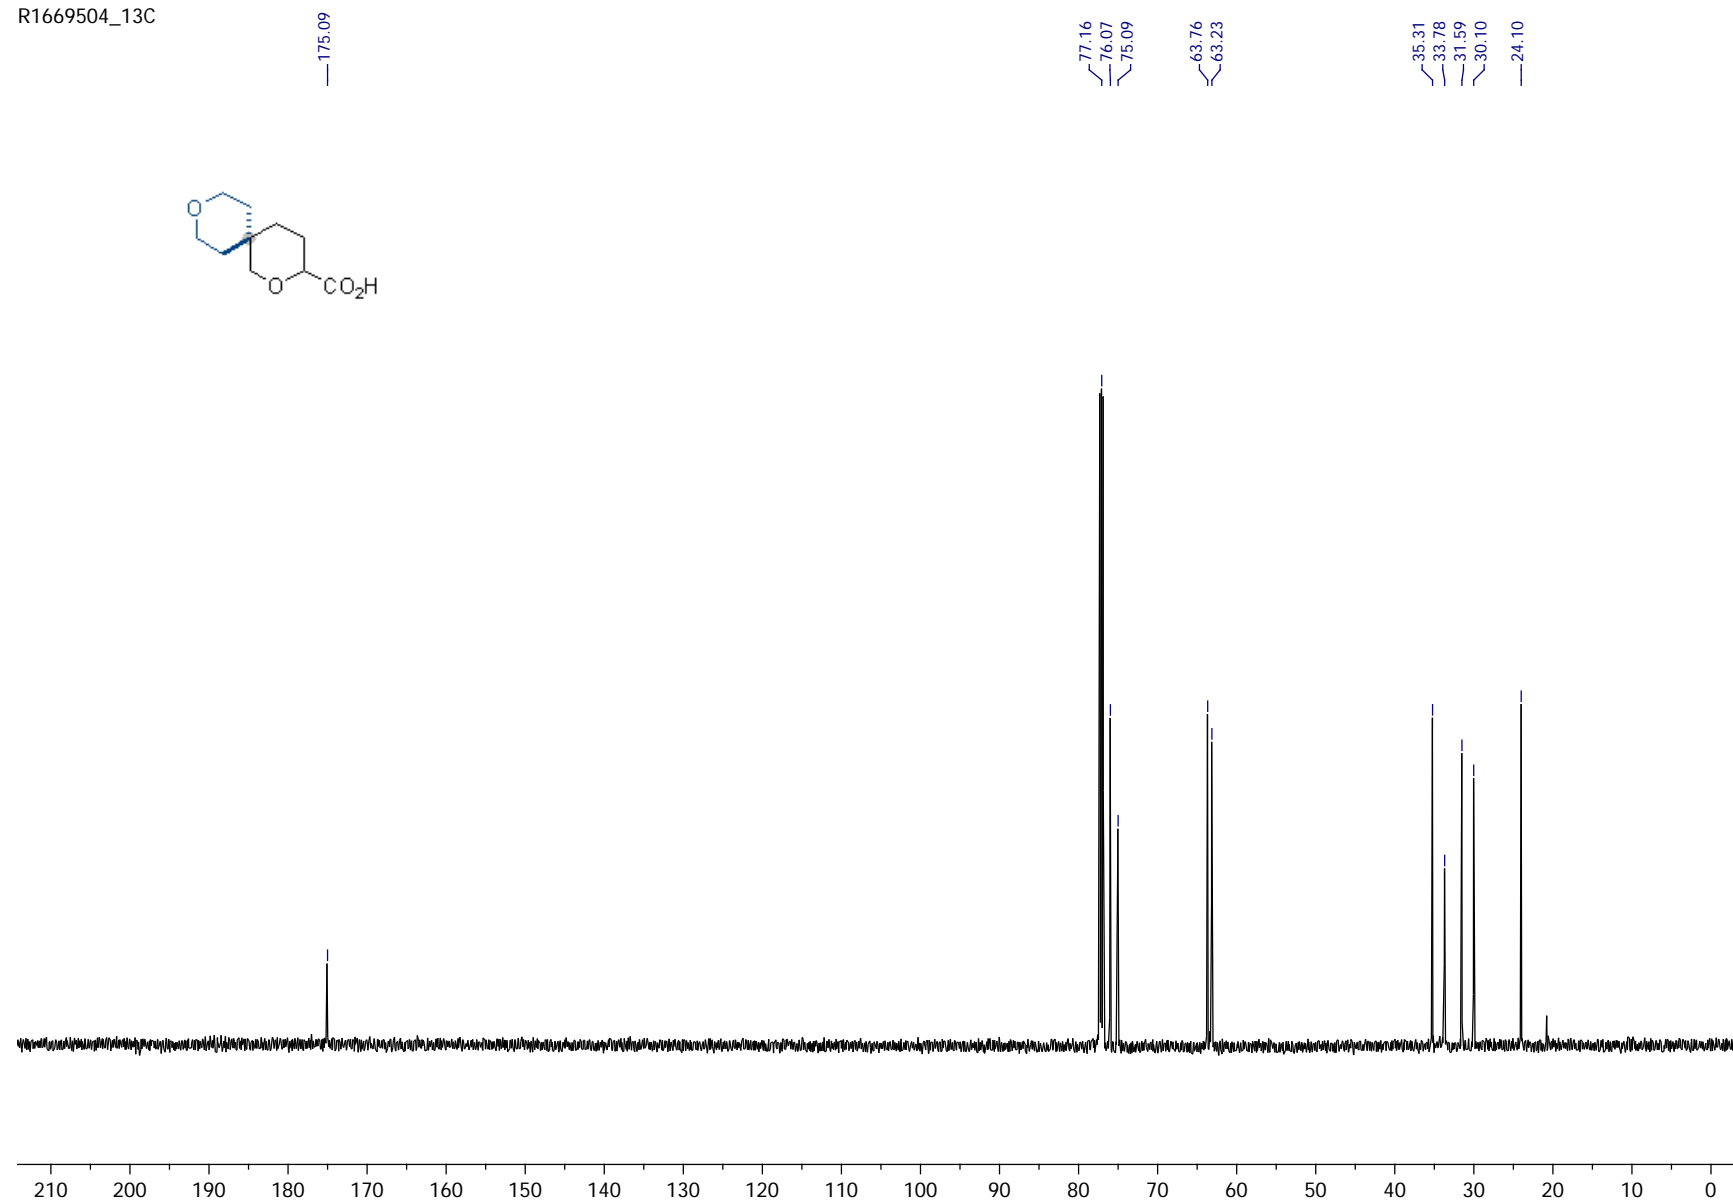

Compound 40d

R1725662

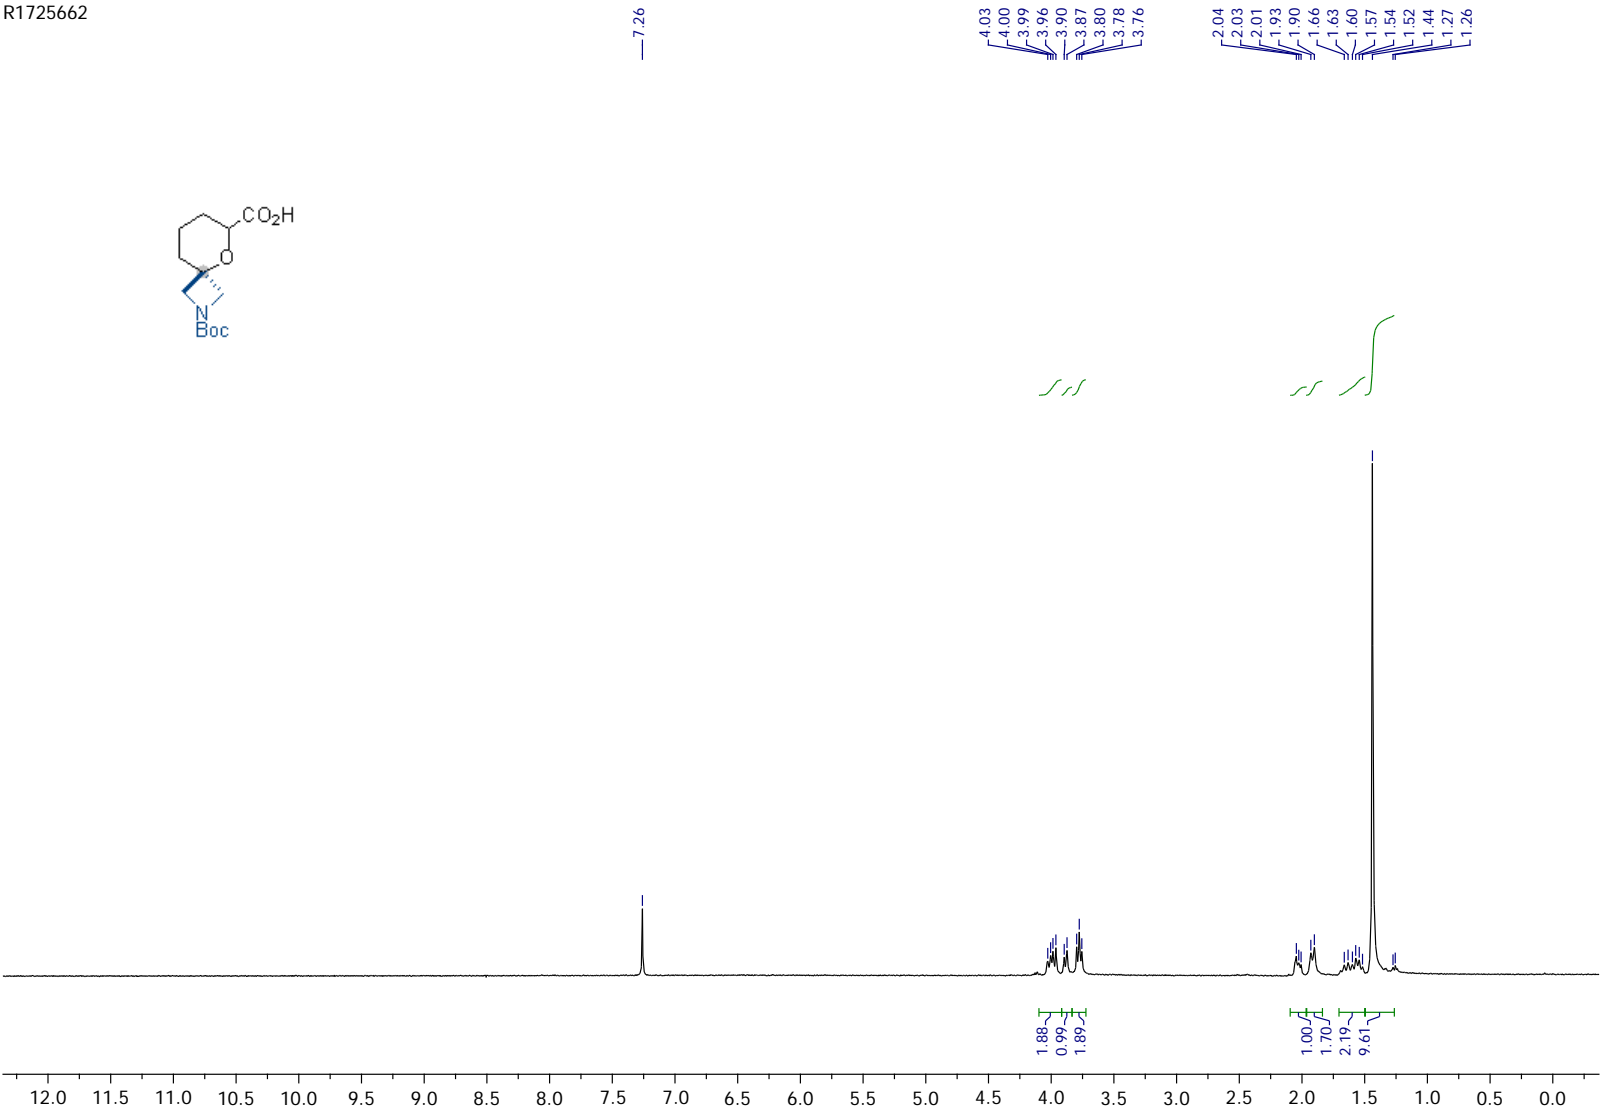

R1725662\_C13\_T

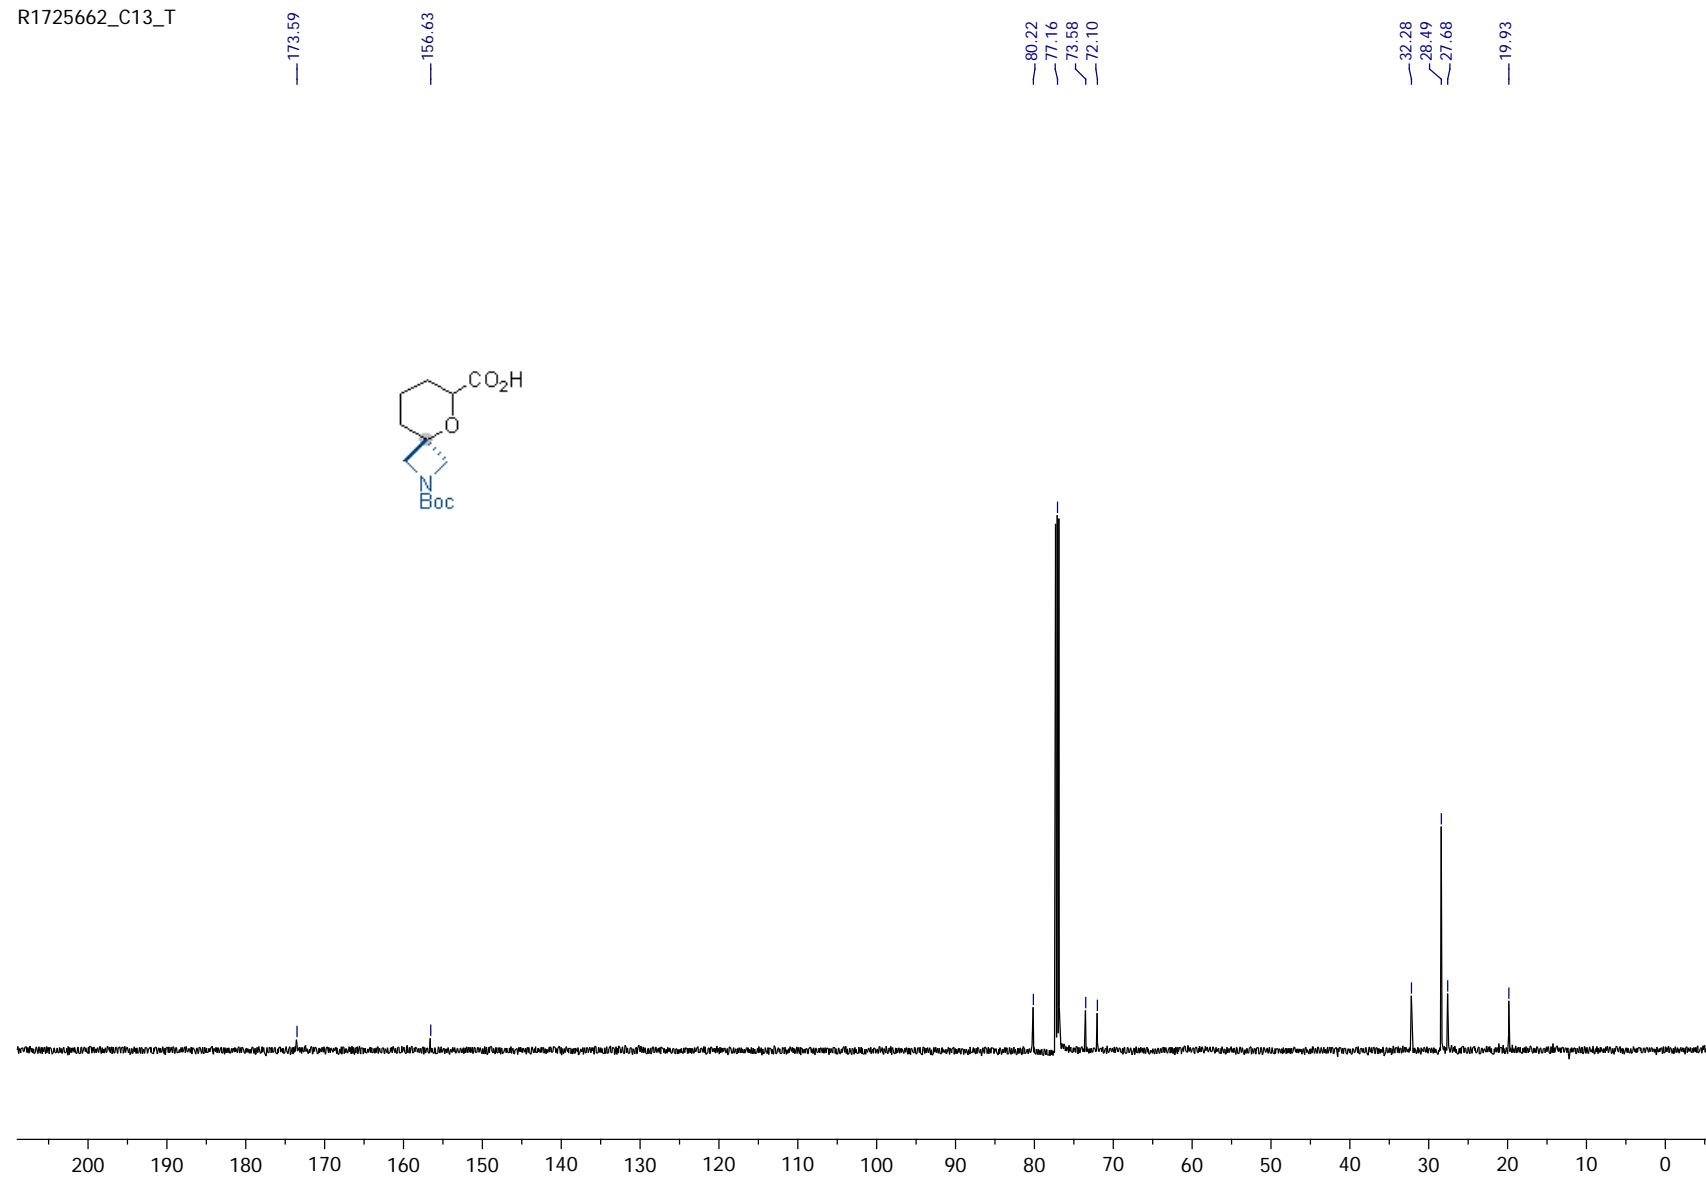

Compound 42d

R1675870

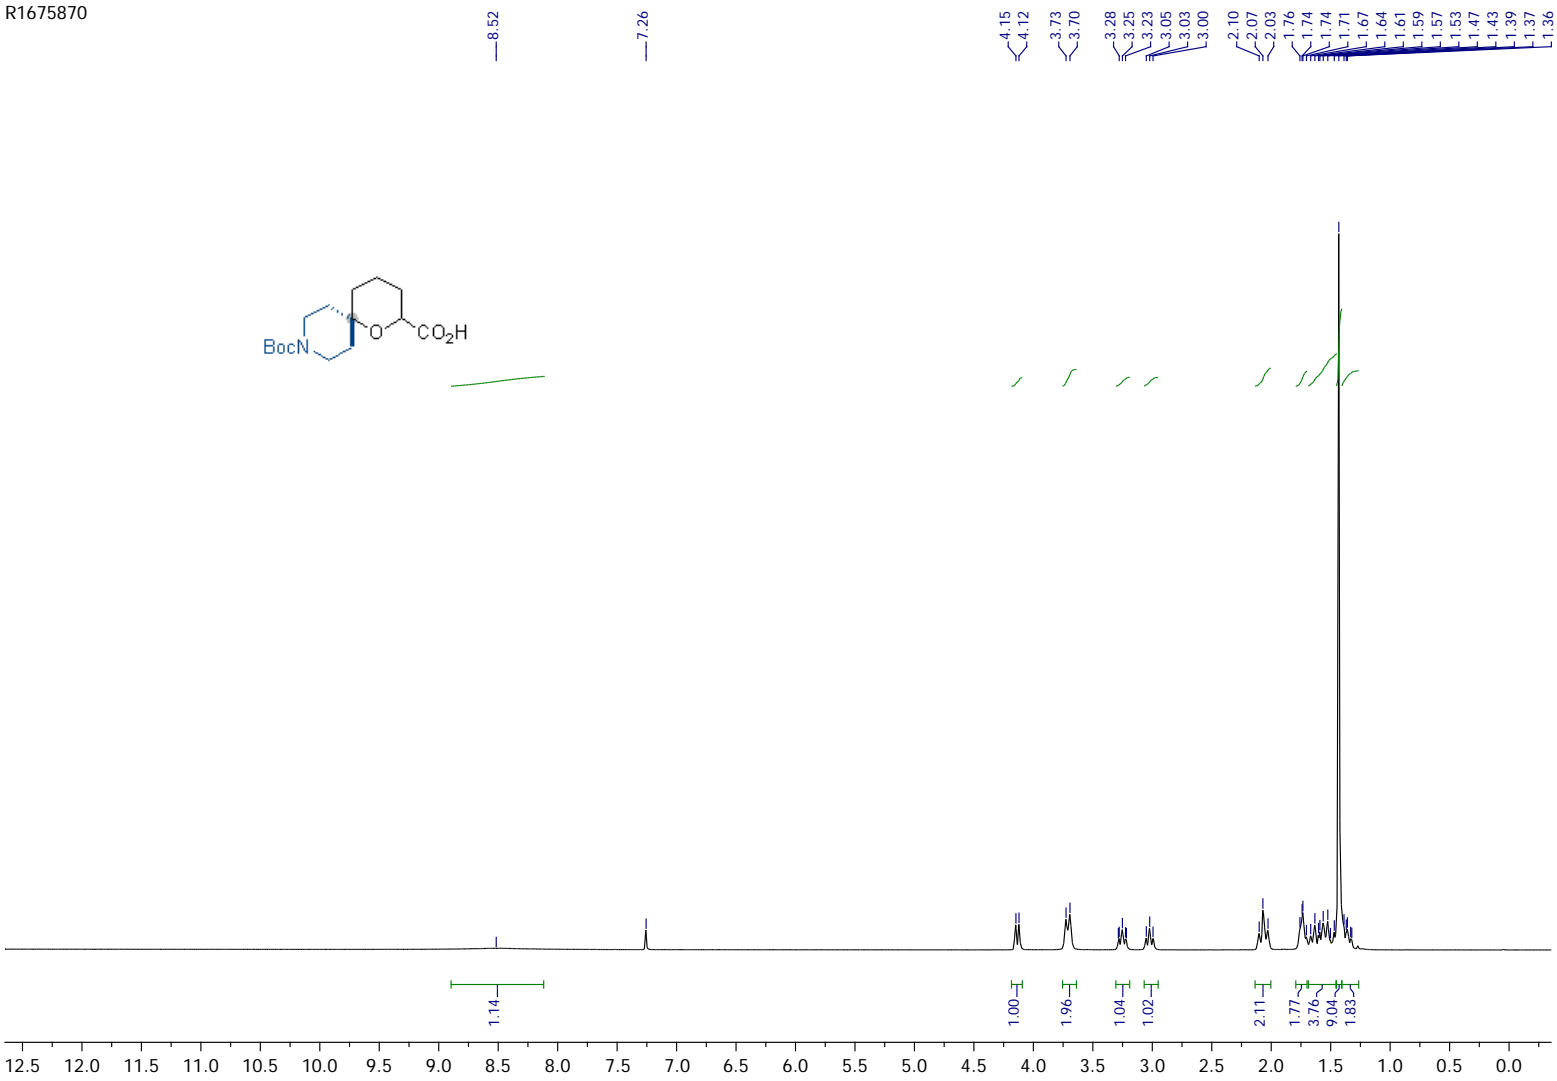



R1675870\_C13

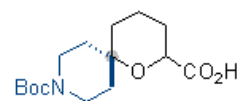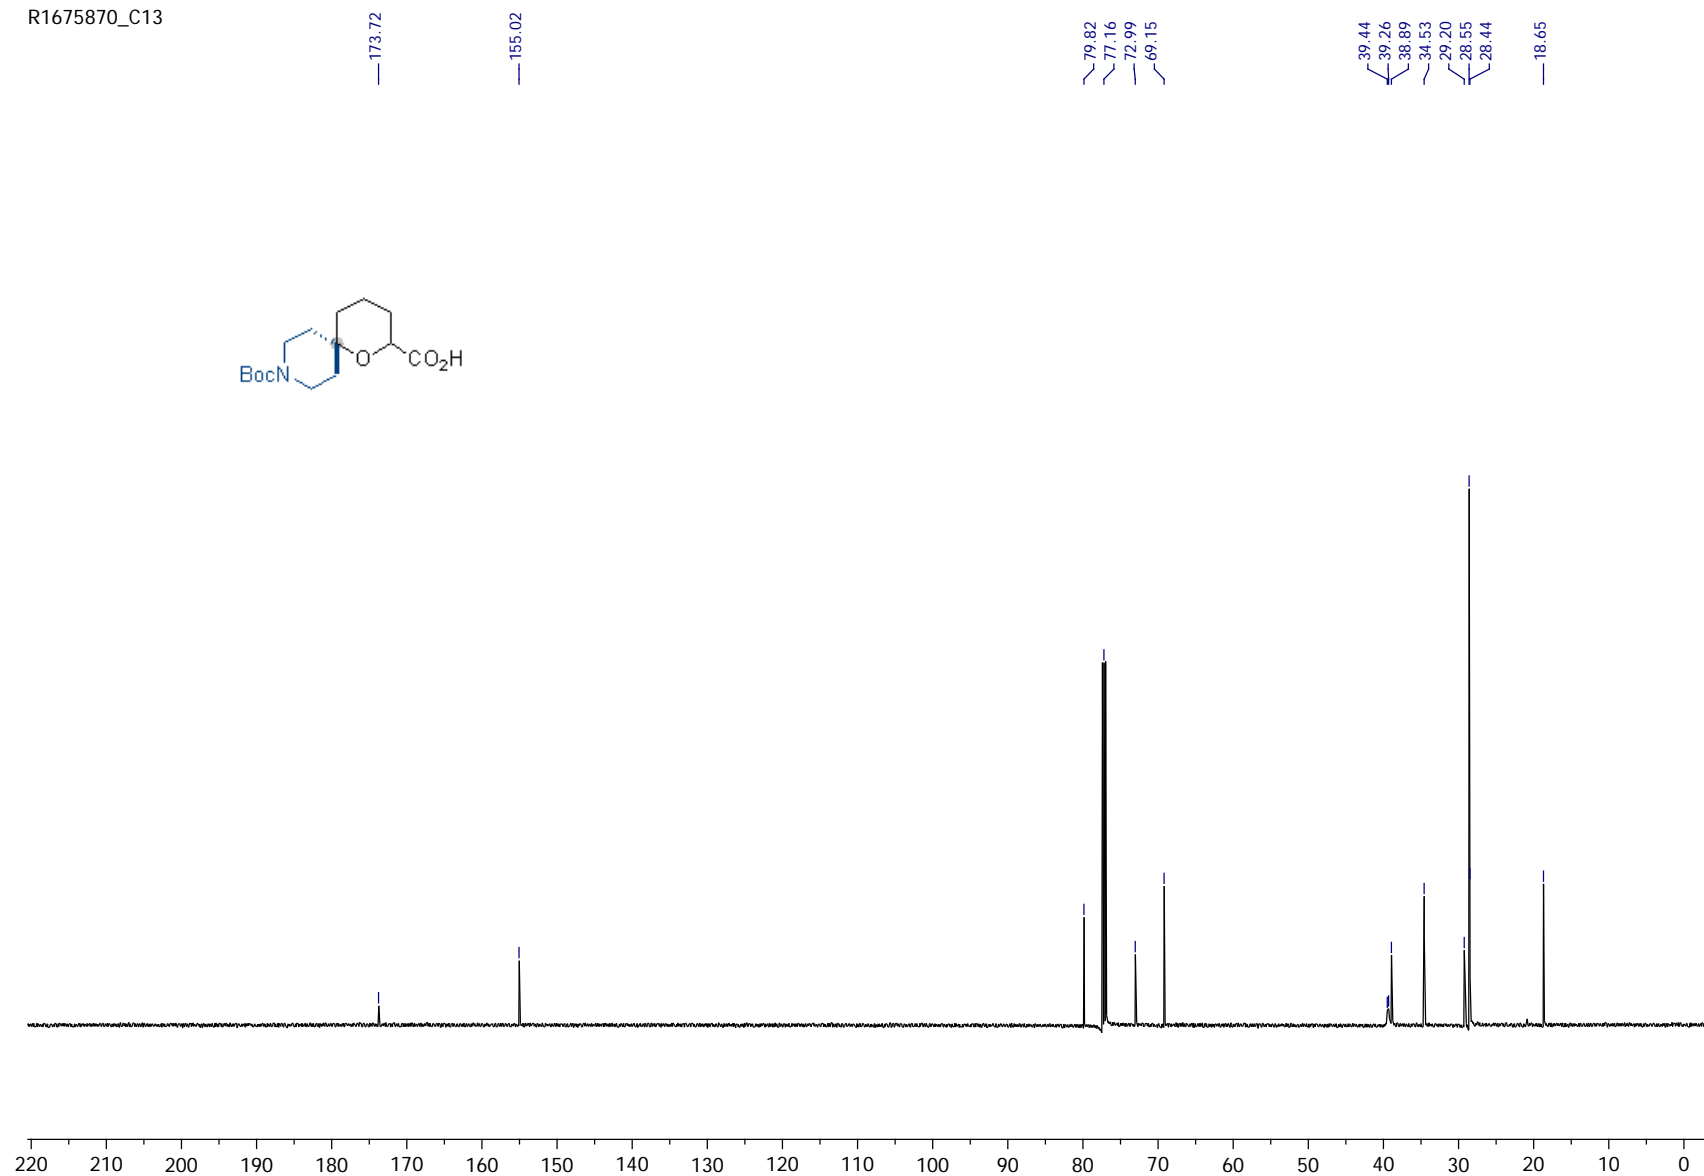

### Compound 44d

R1673606

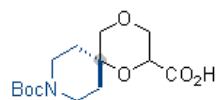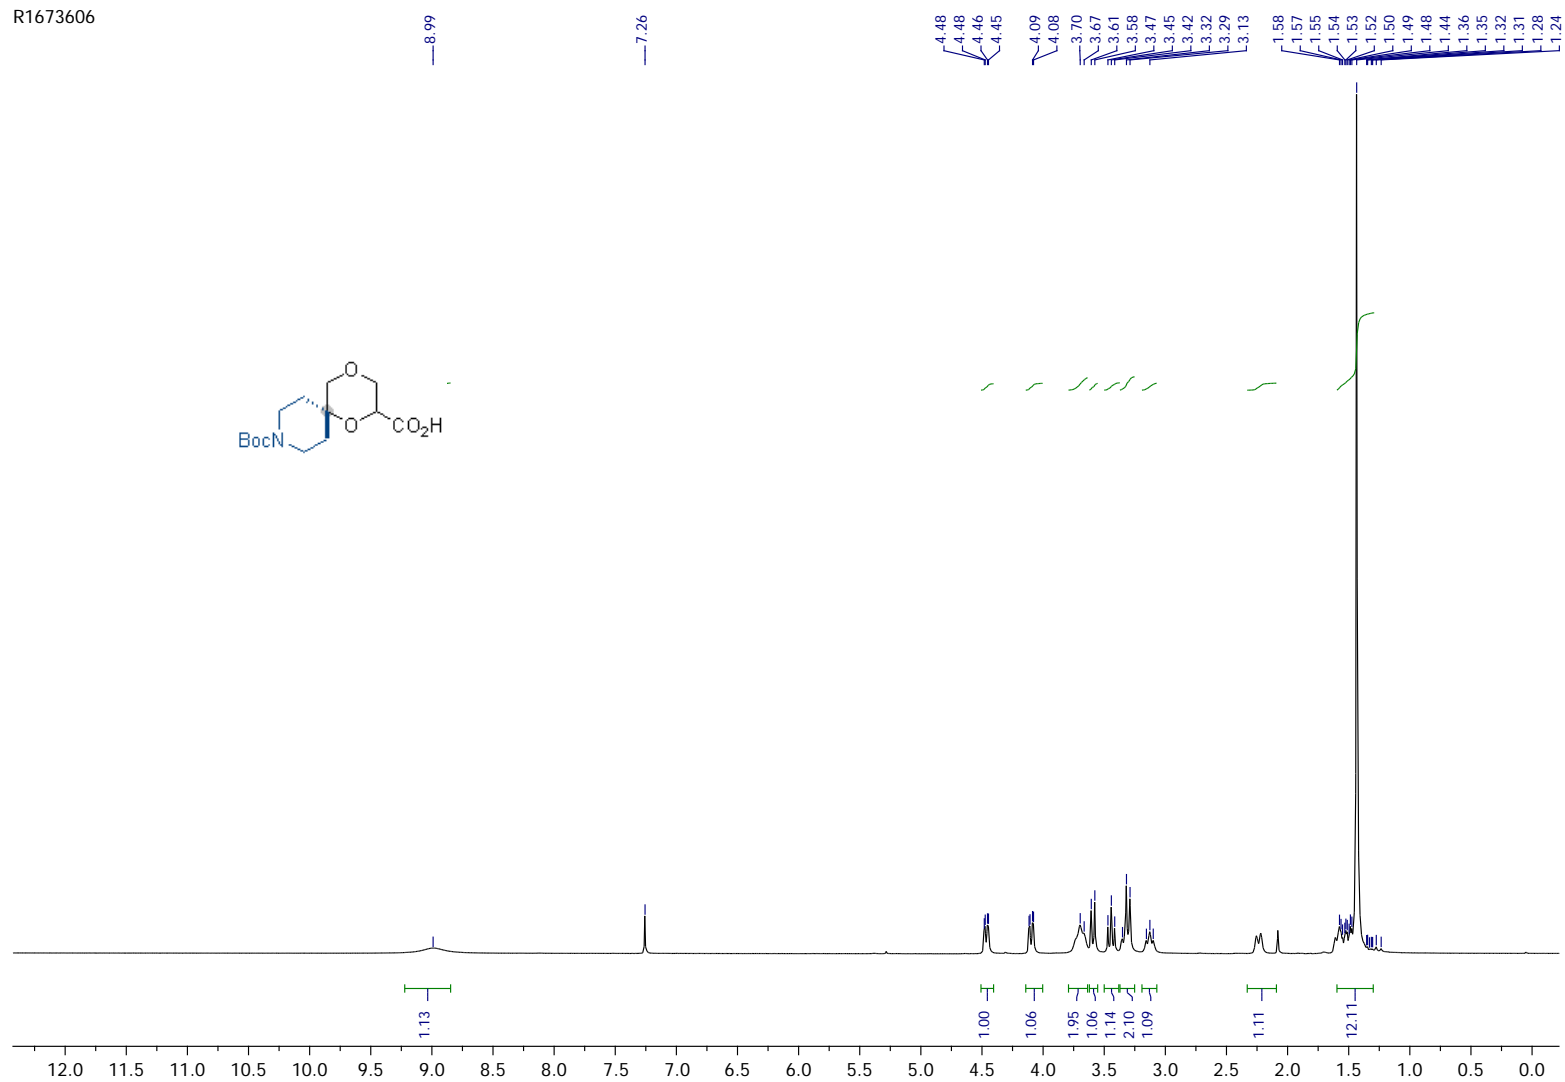

R1673606\_C13

|||||

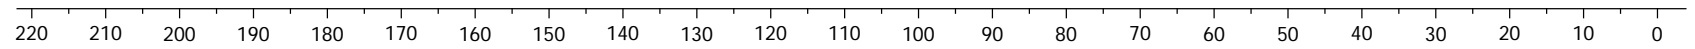

Compound 4e

R1730309

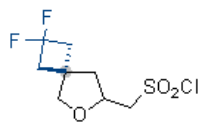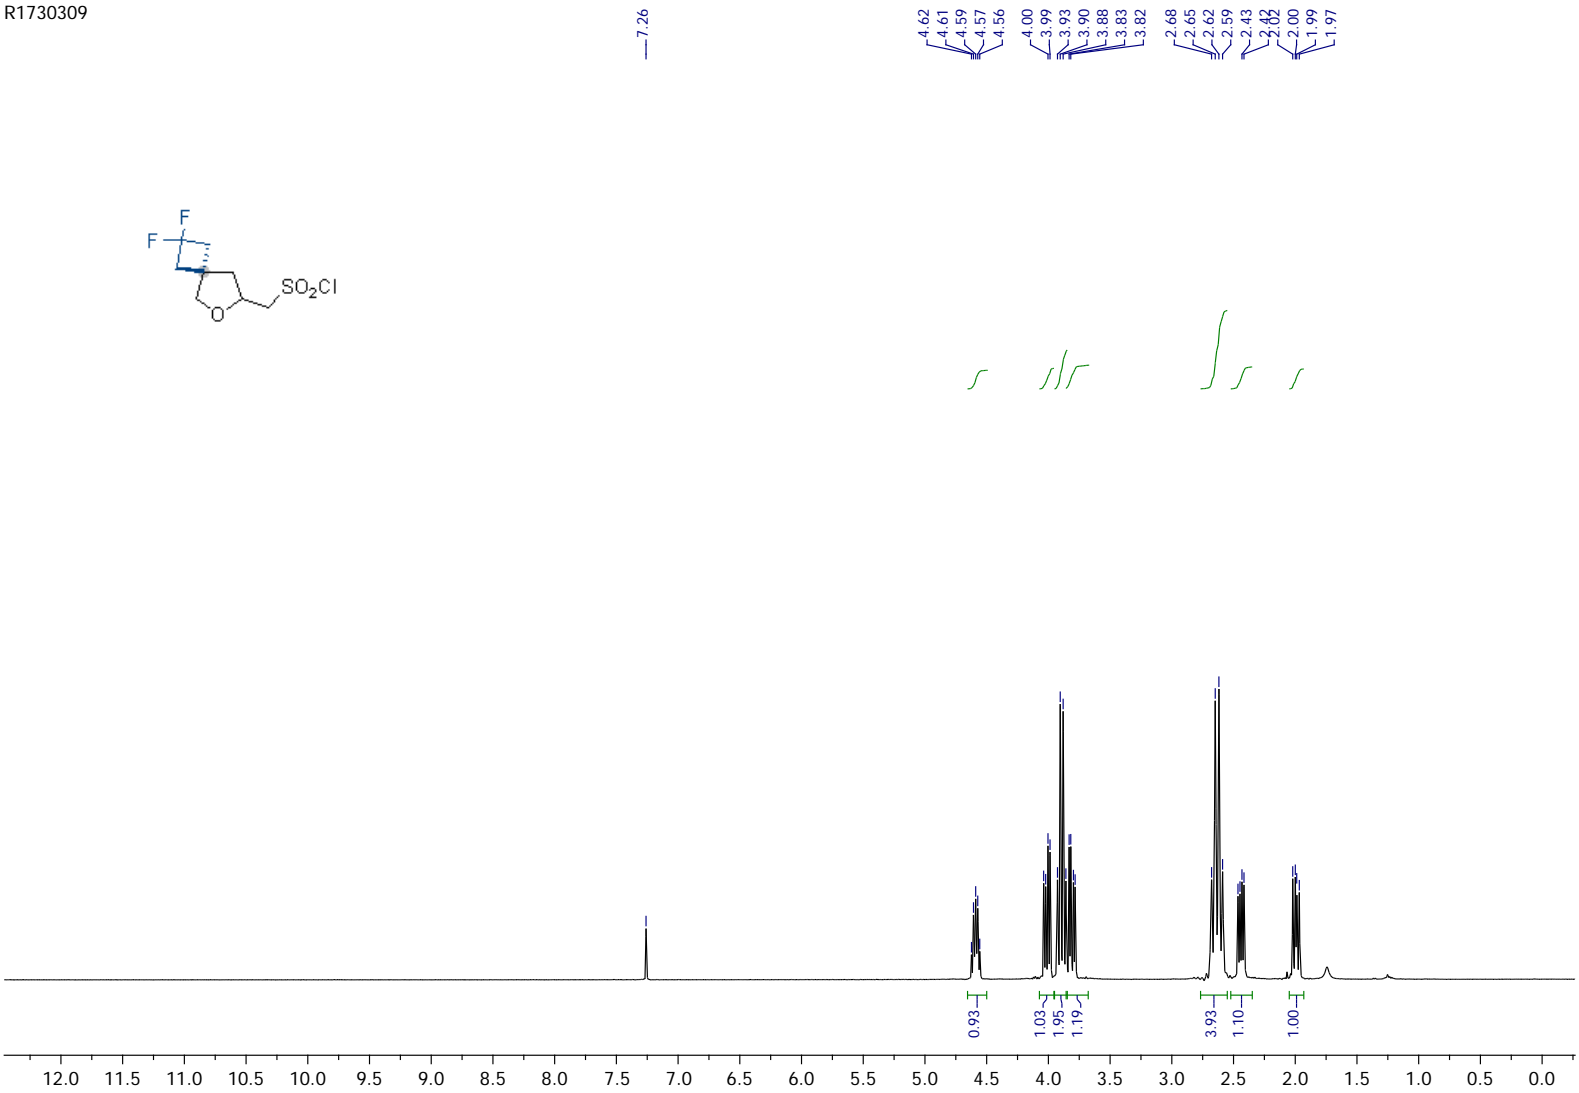

R1730309\_C13

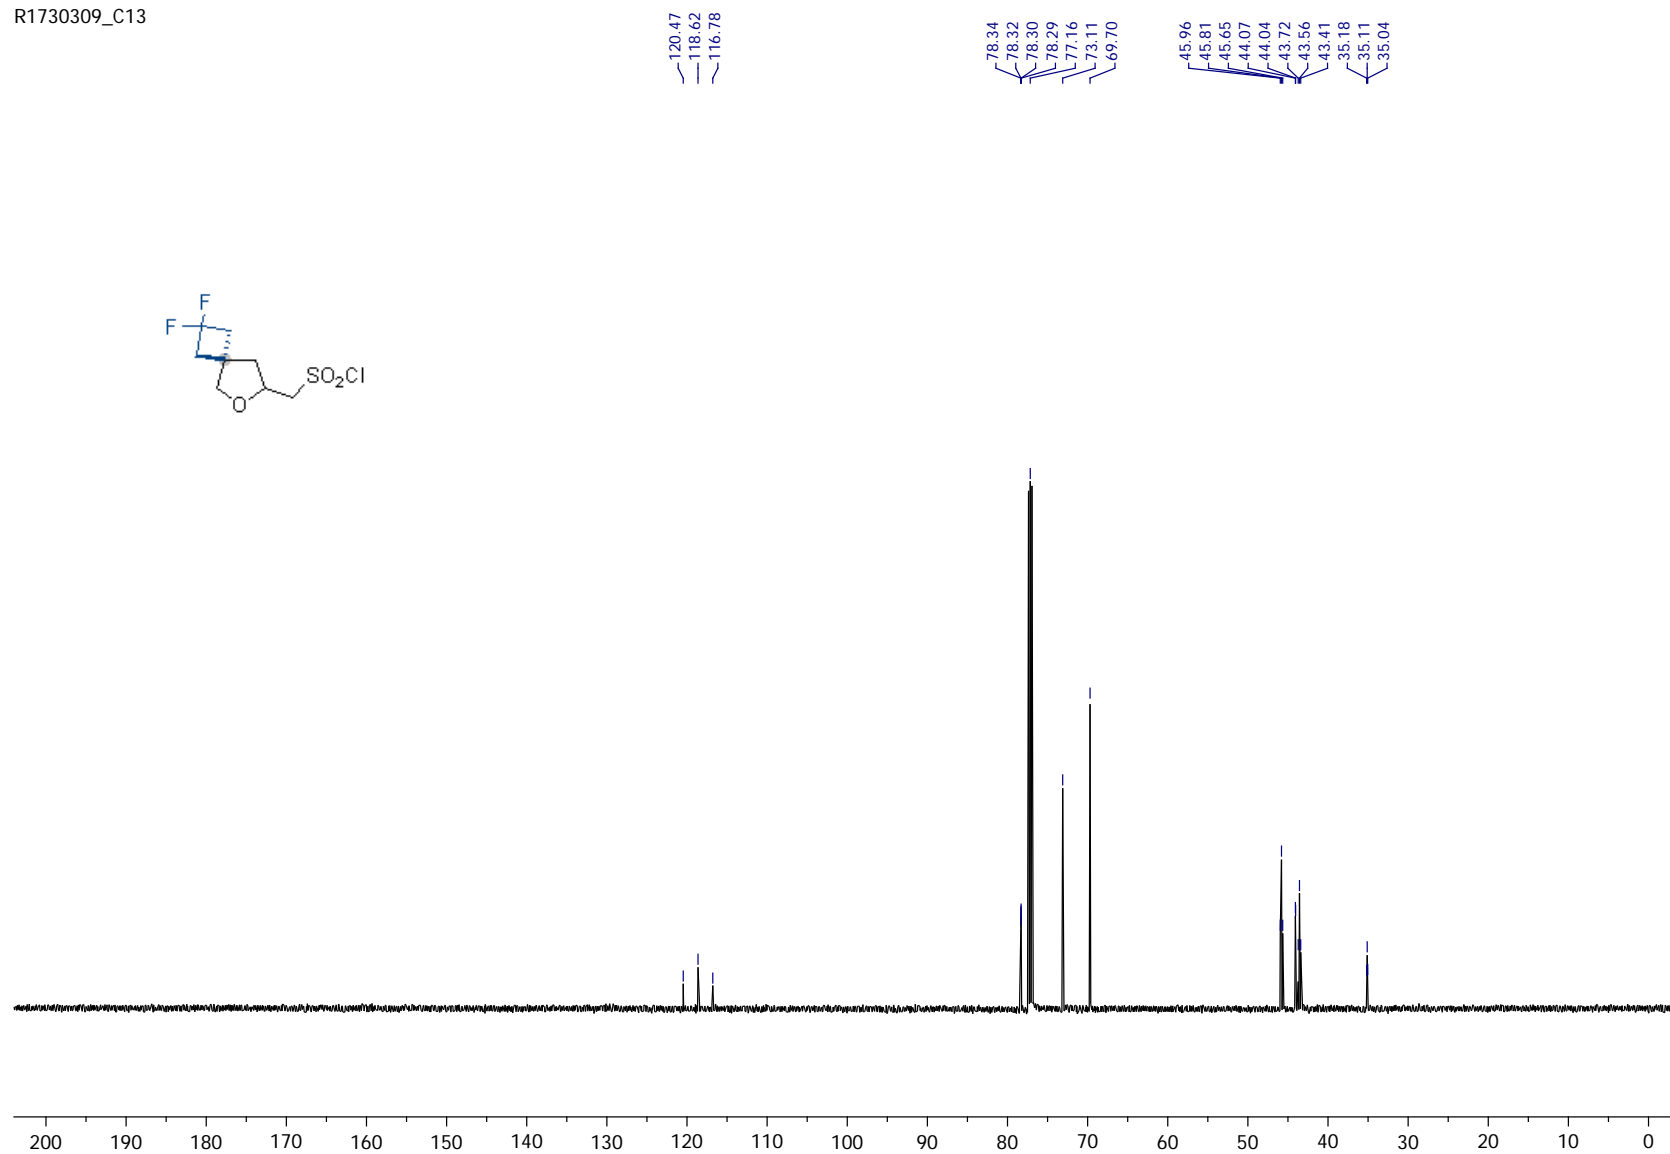

R1730309\_F19{H}

-90.97  
-91.49  
-91.97  
-92.50

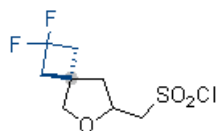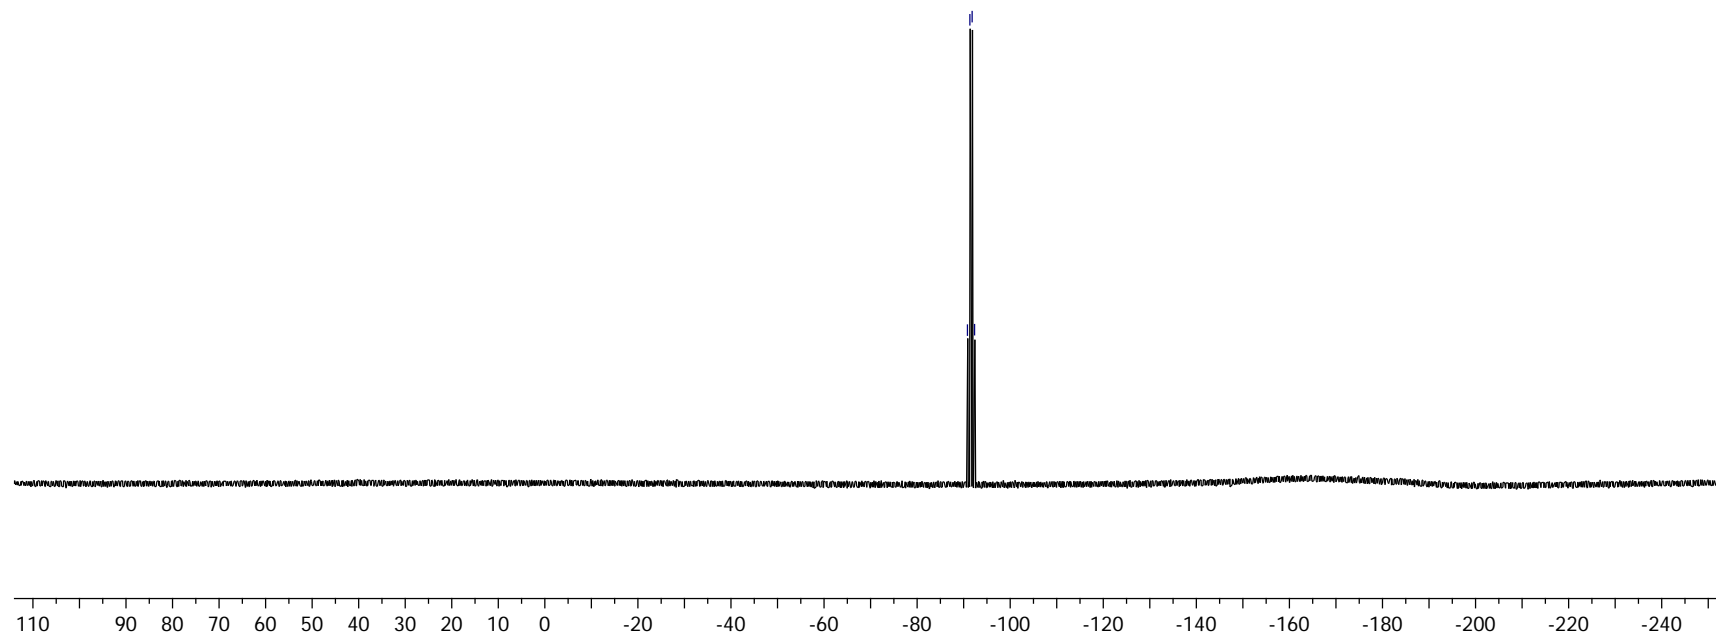

Compound 5e

R1391462

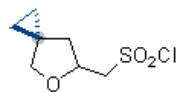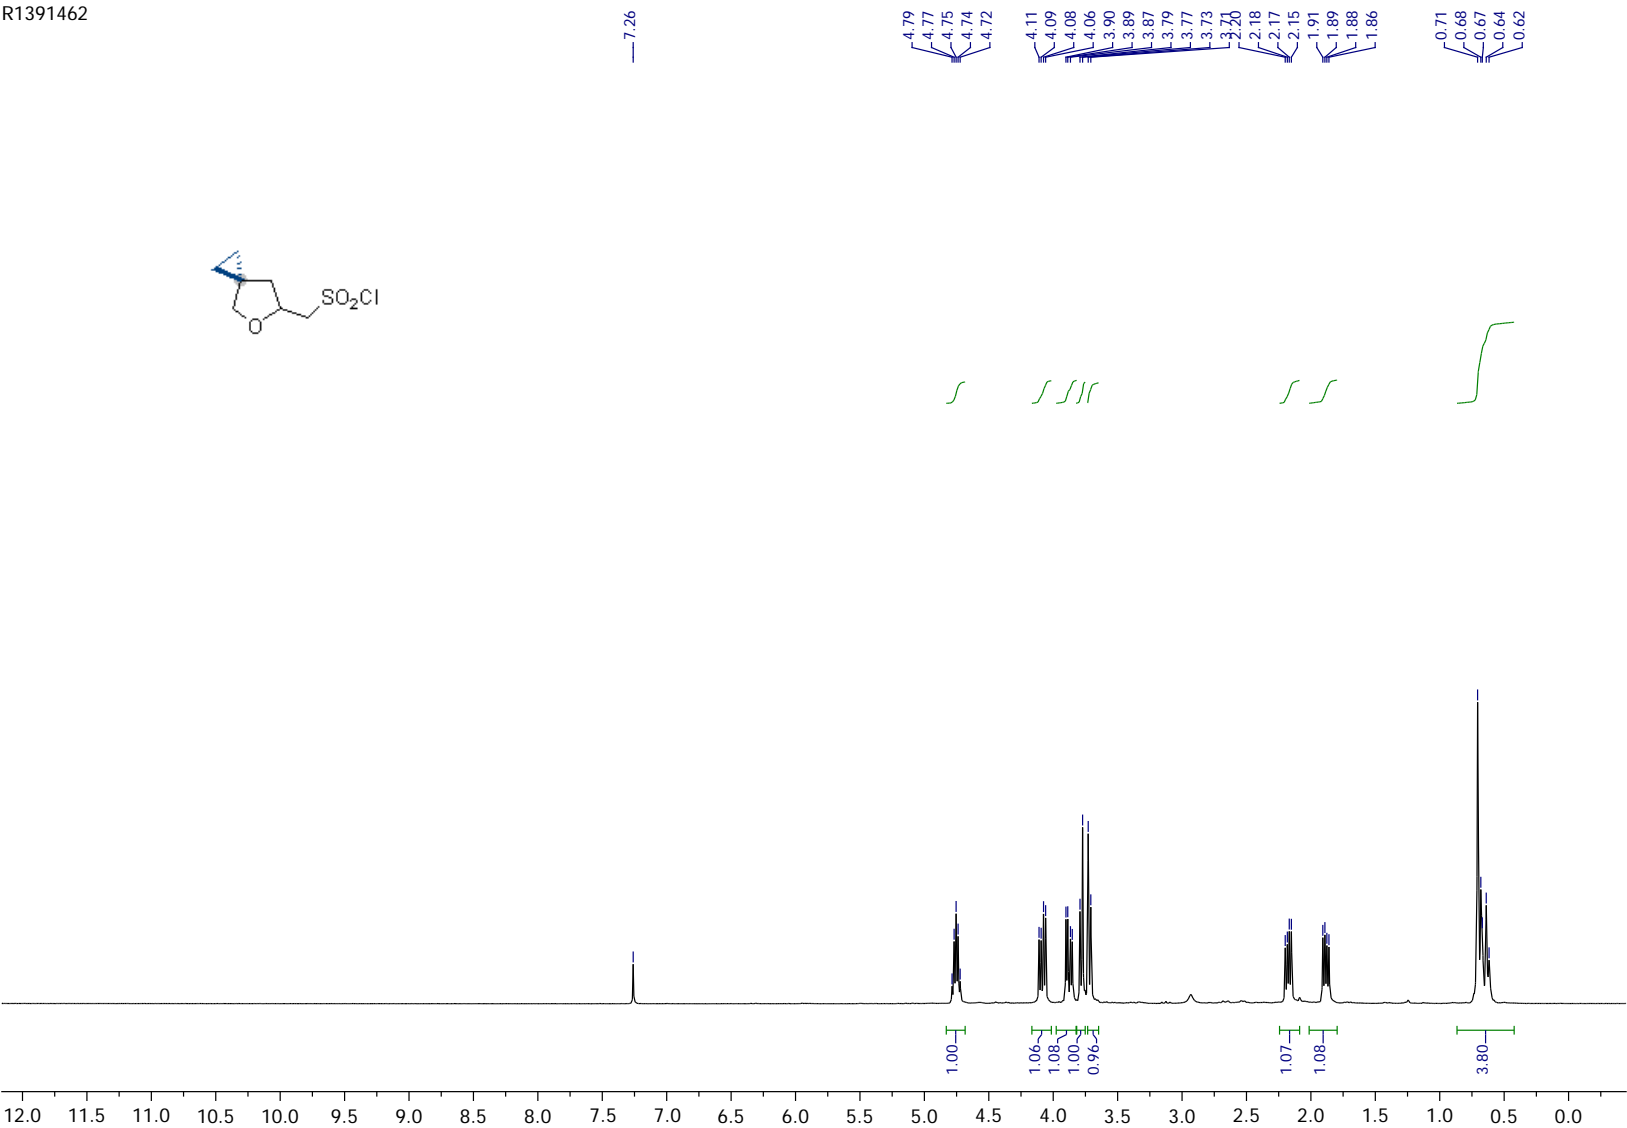

R1391462\_C13

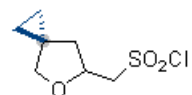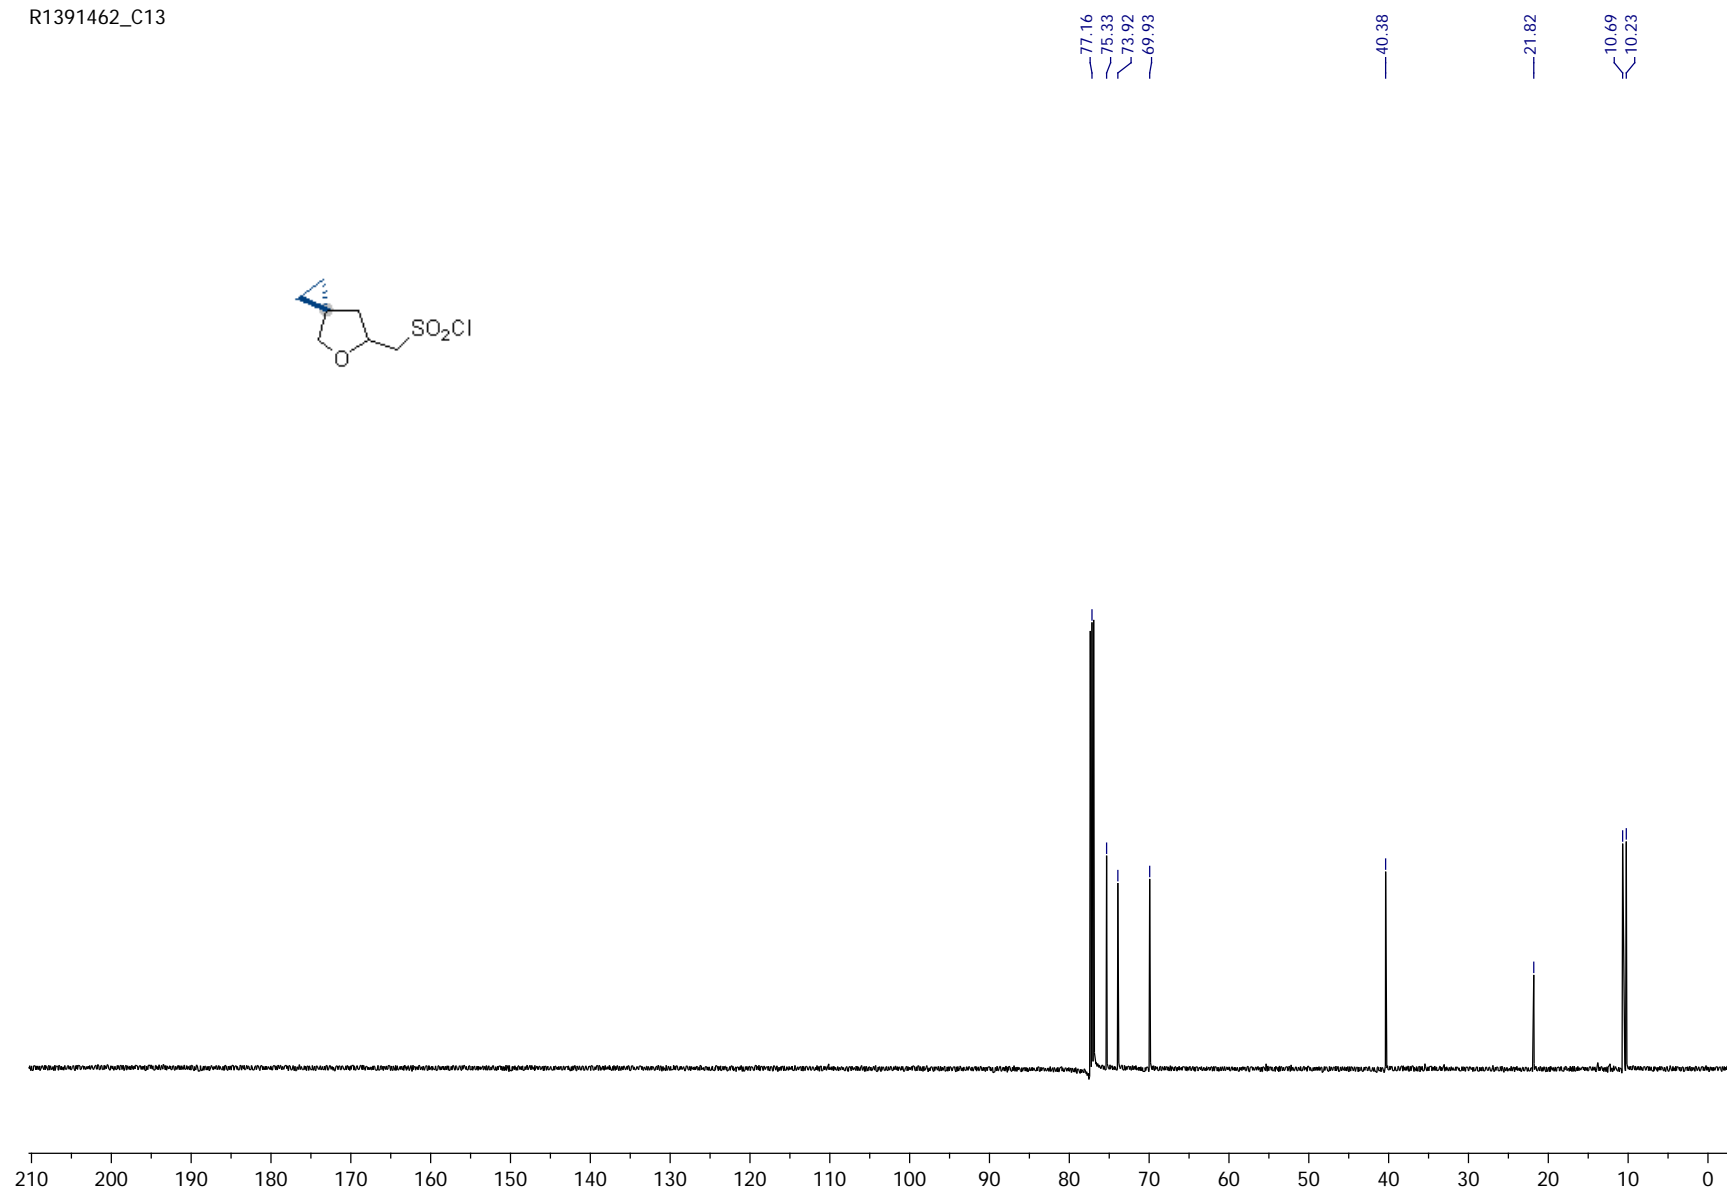



Compound 6e

R827591

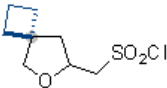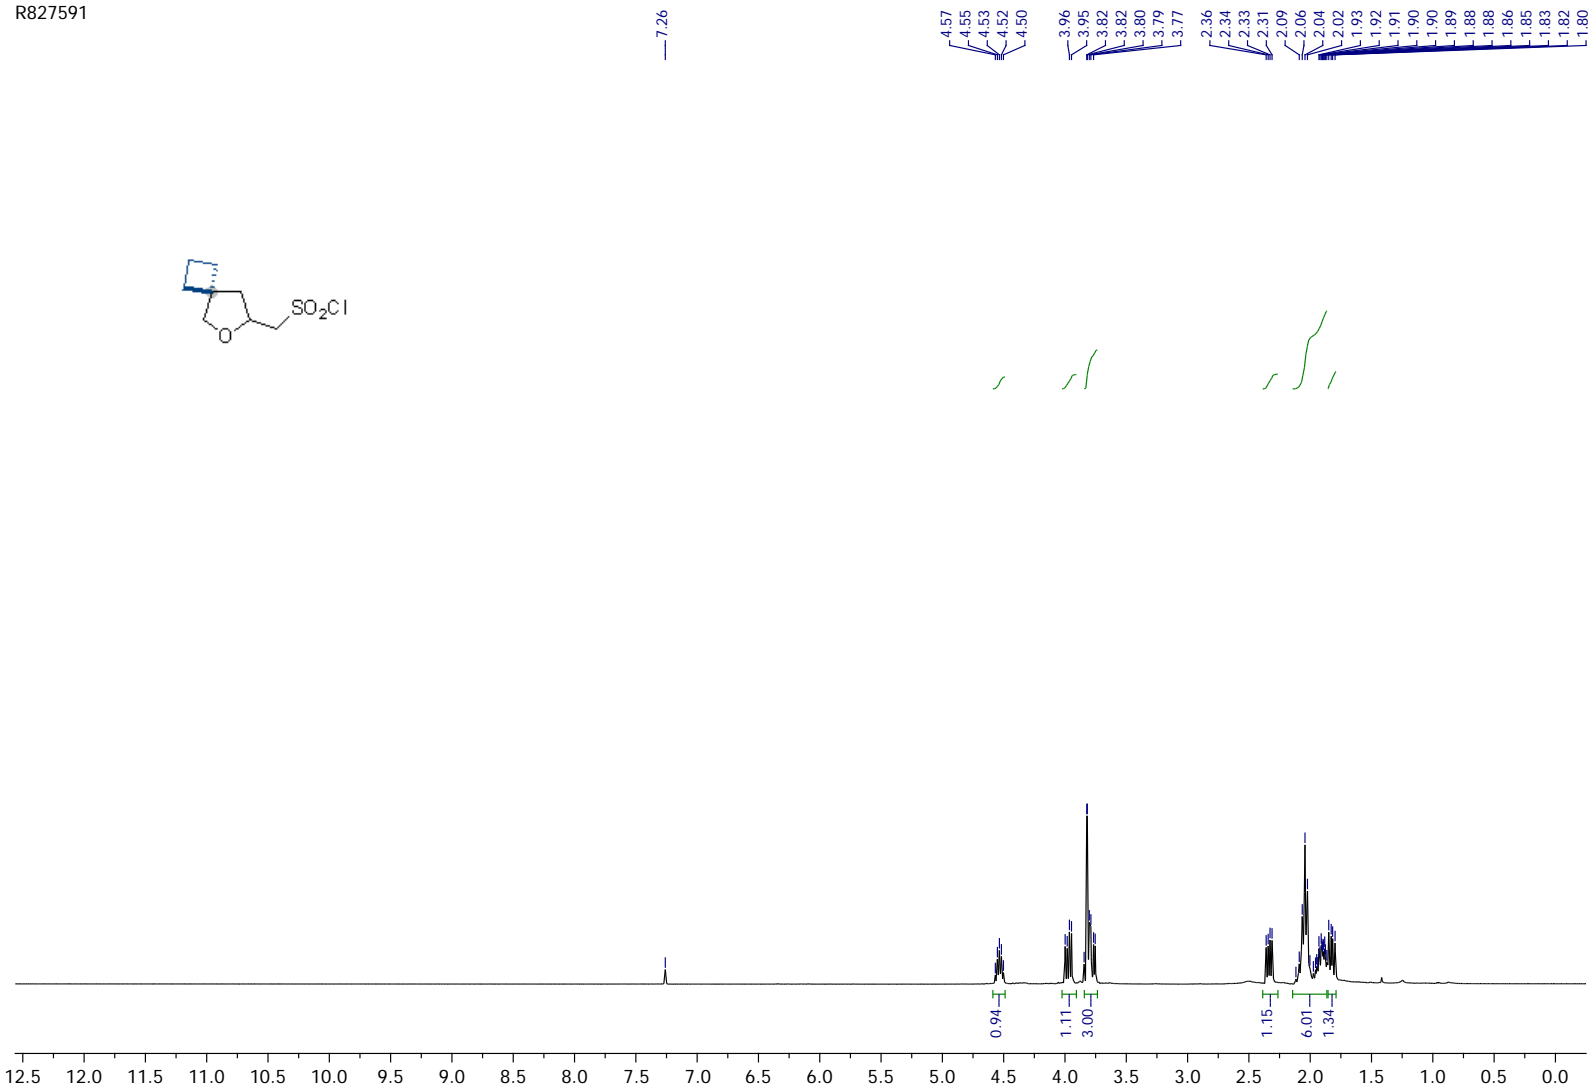

R827591\_C13

|||||

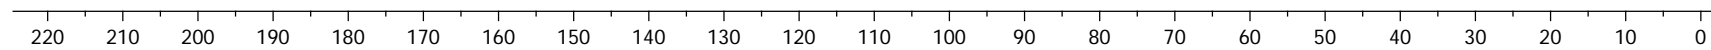

### Compound 8e

R915404

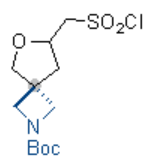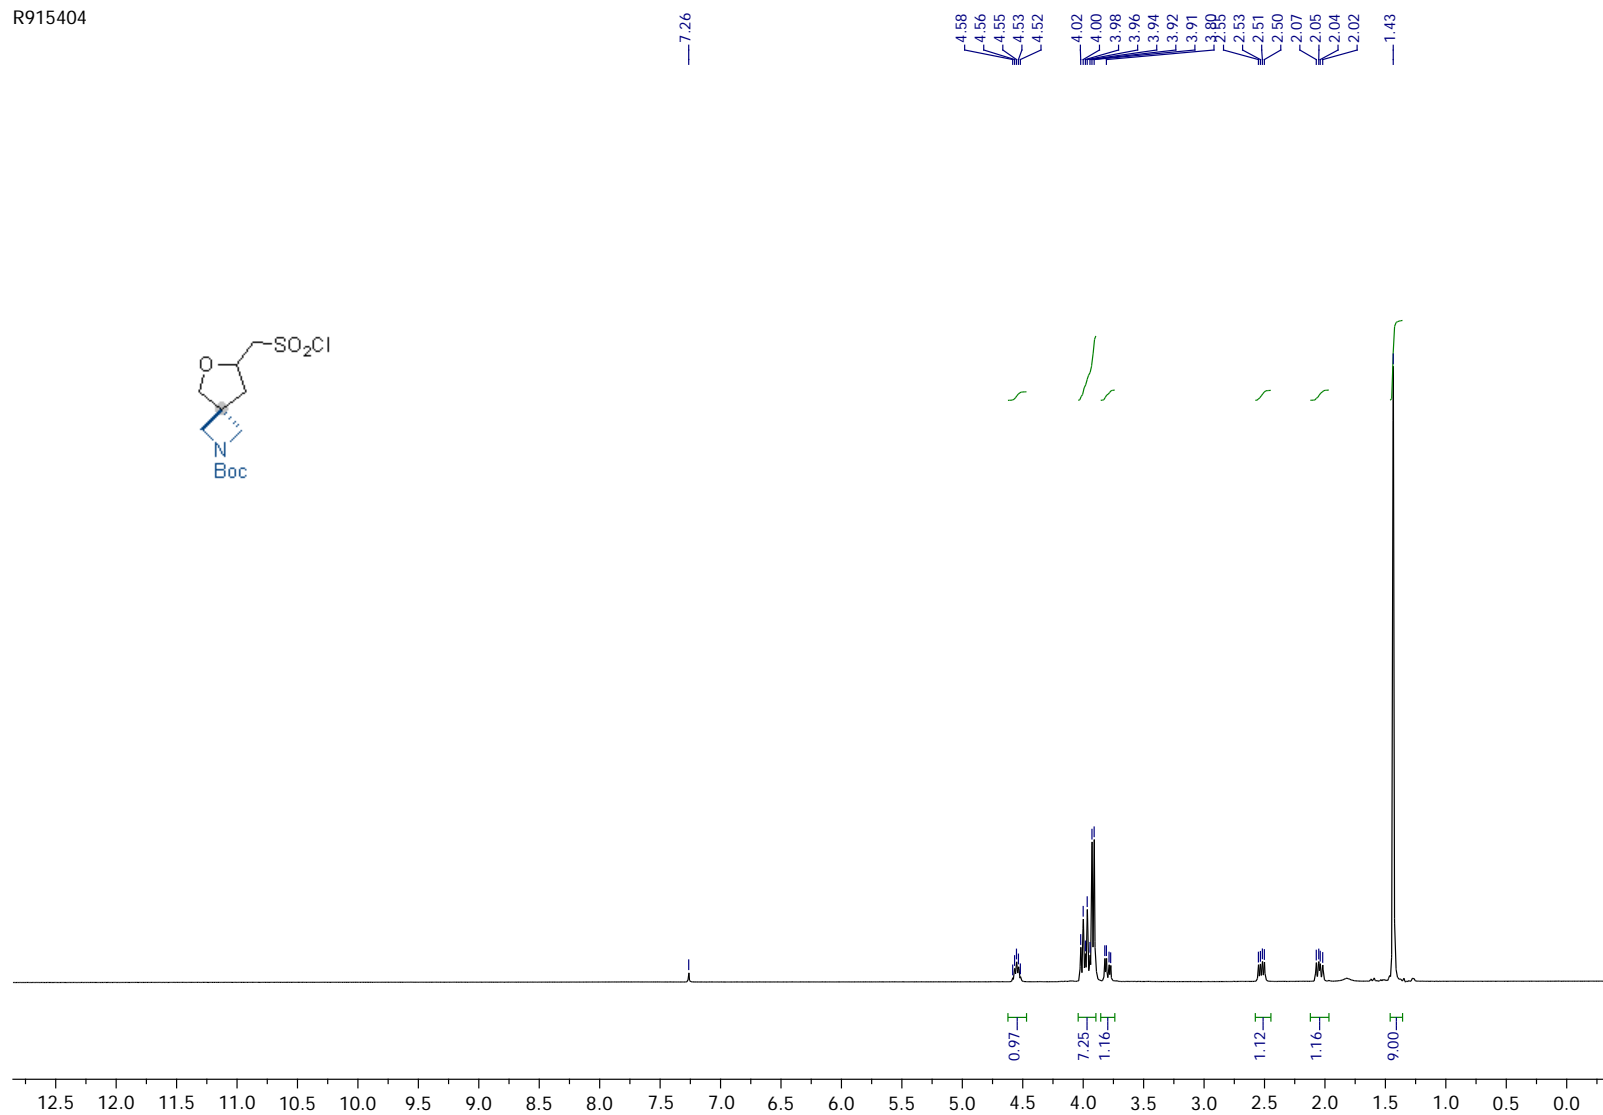

R915404\_C13

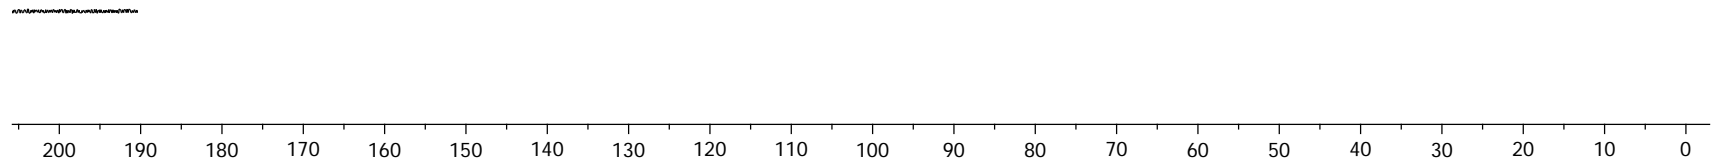

Compound 9e

R1166518

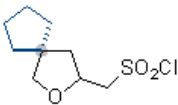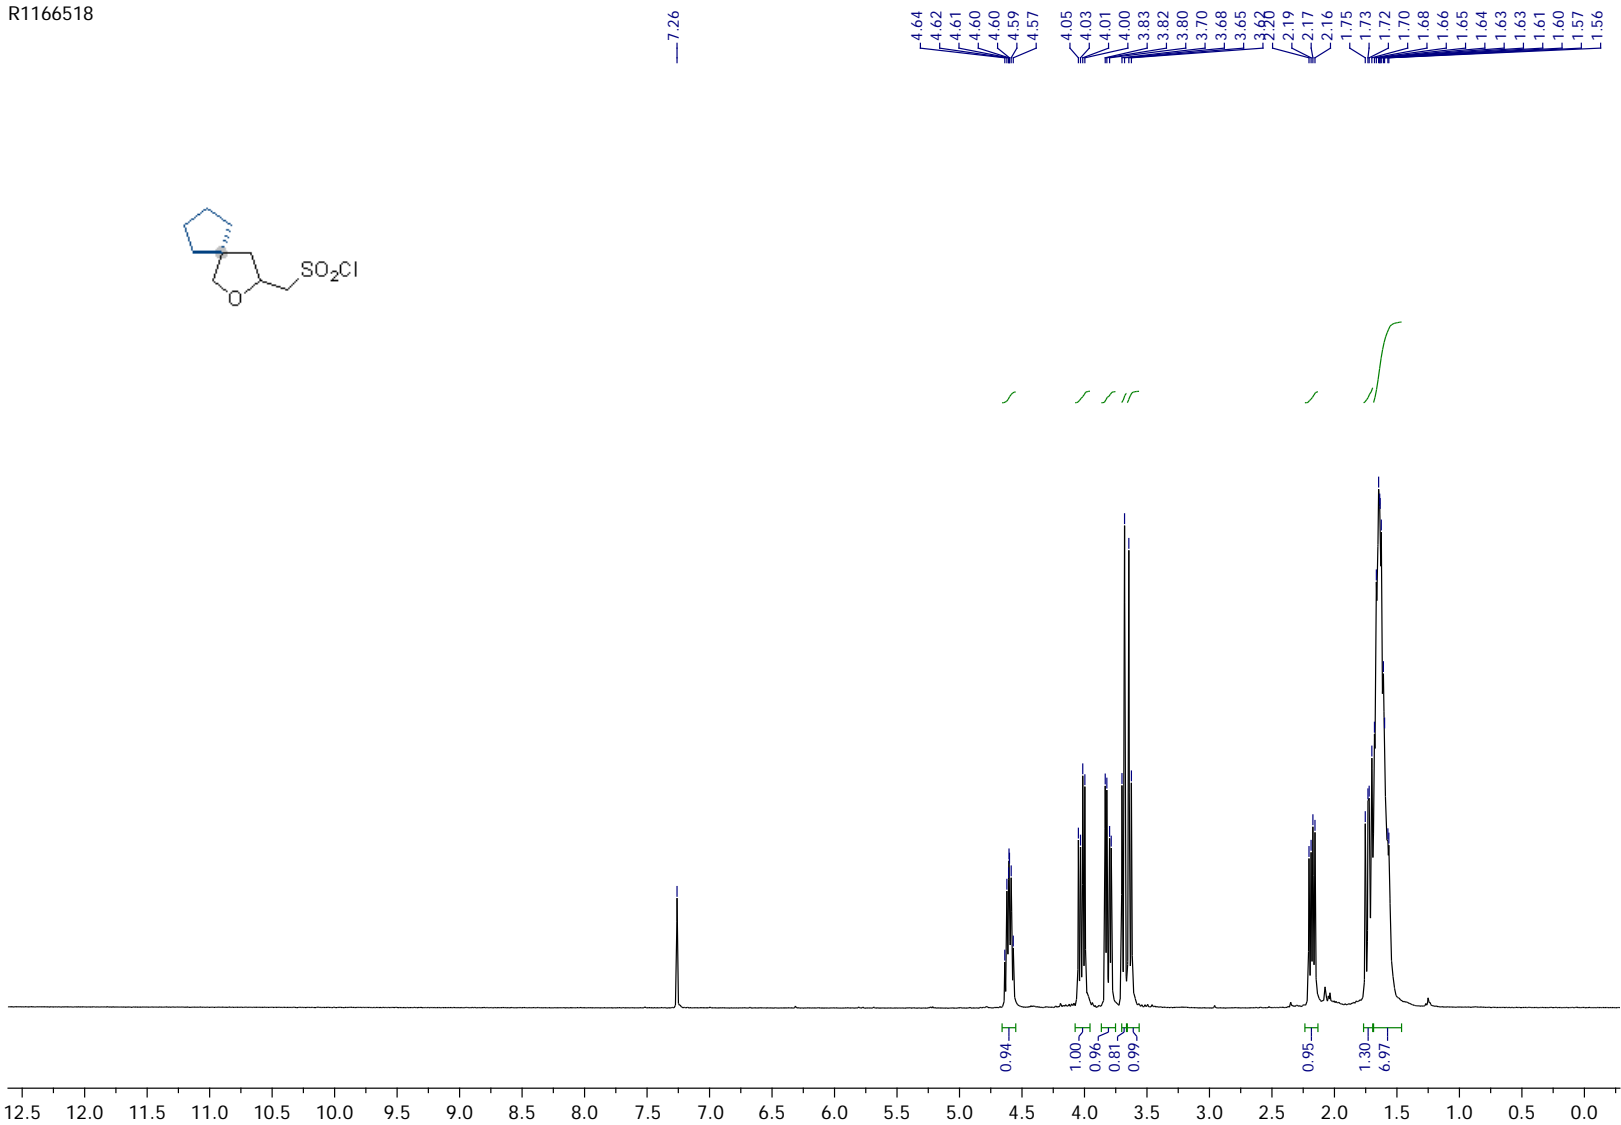

R1166518\_C13

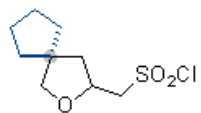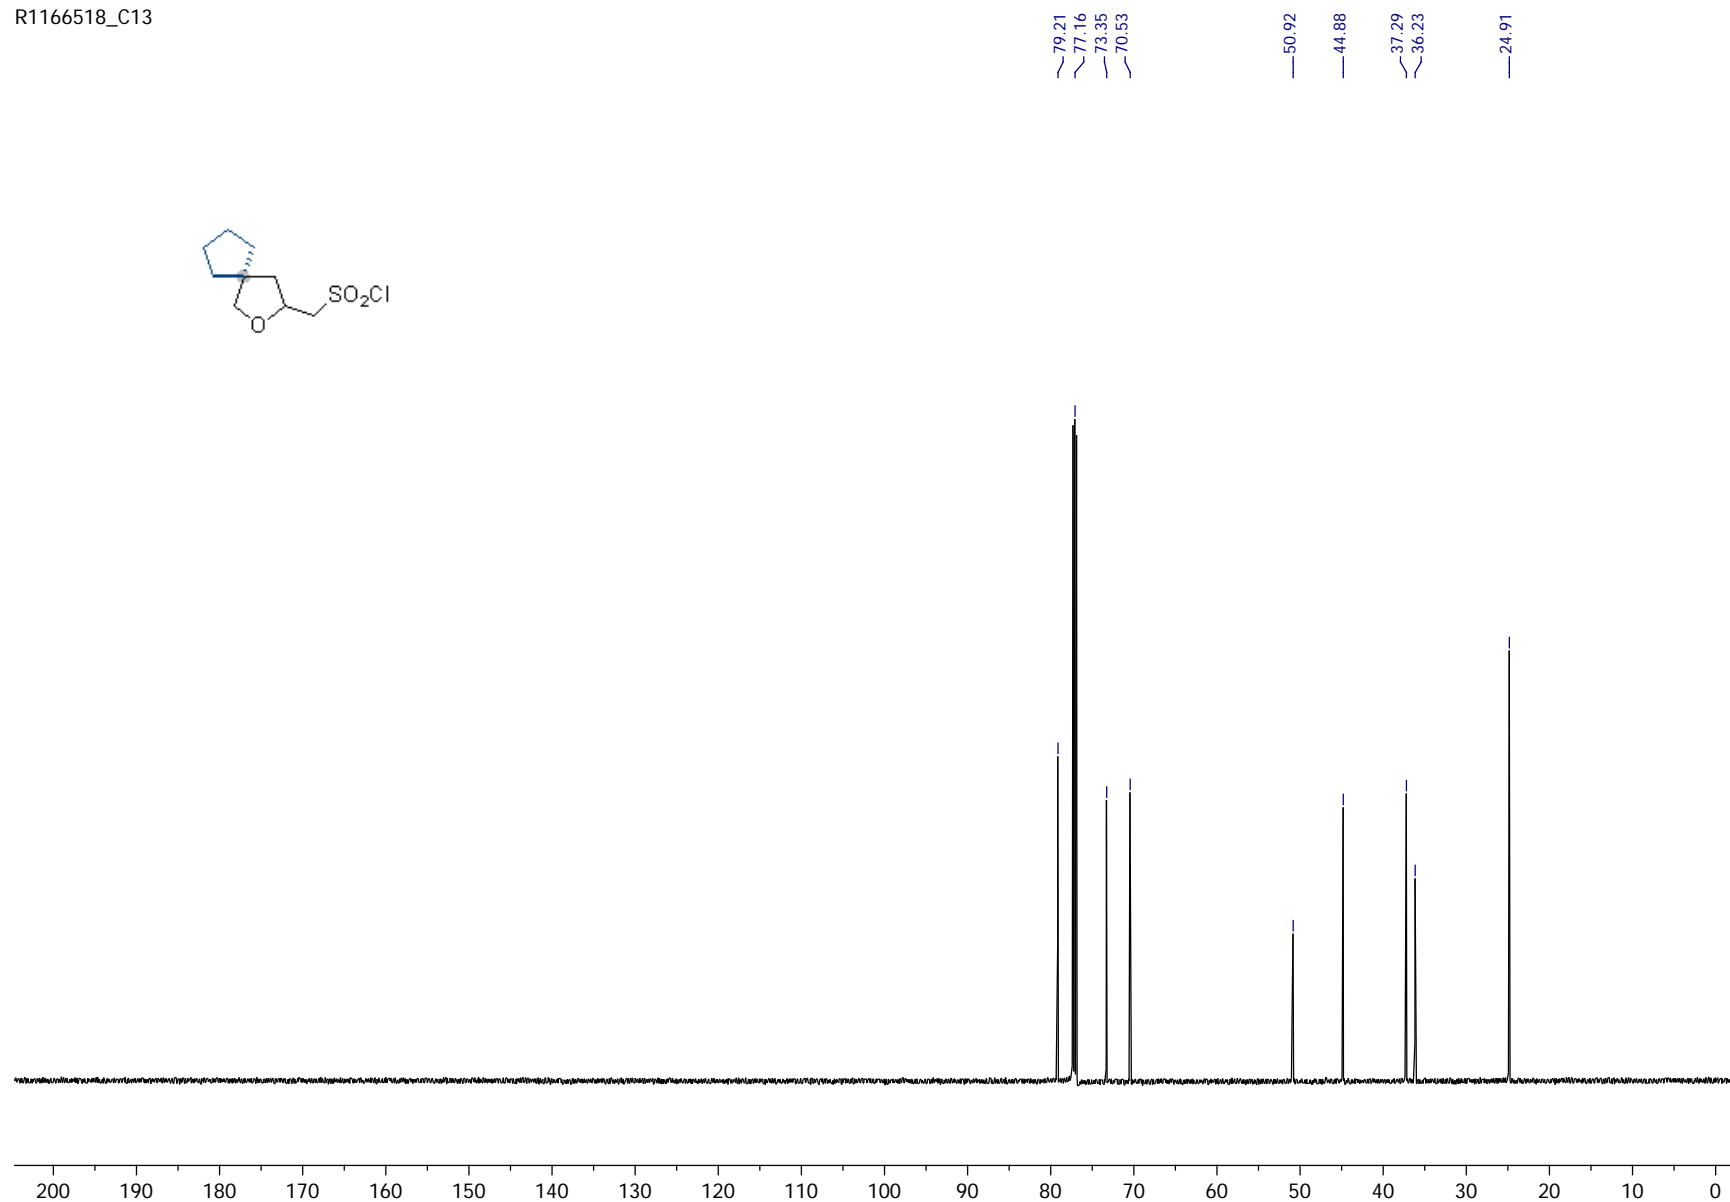

Compound 11e

R1219832

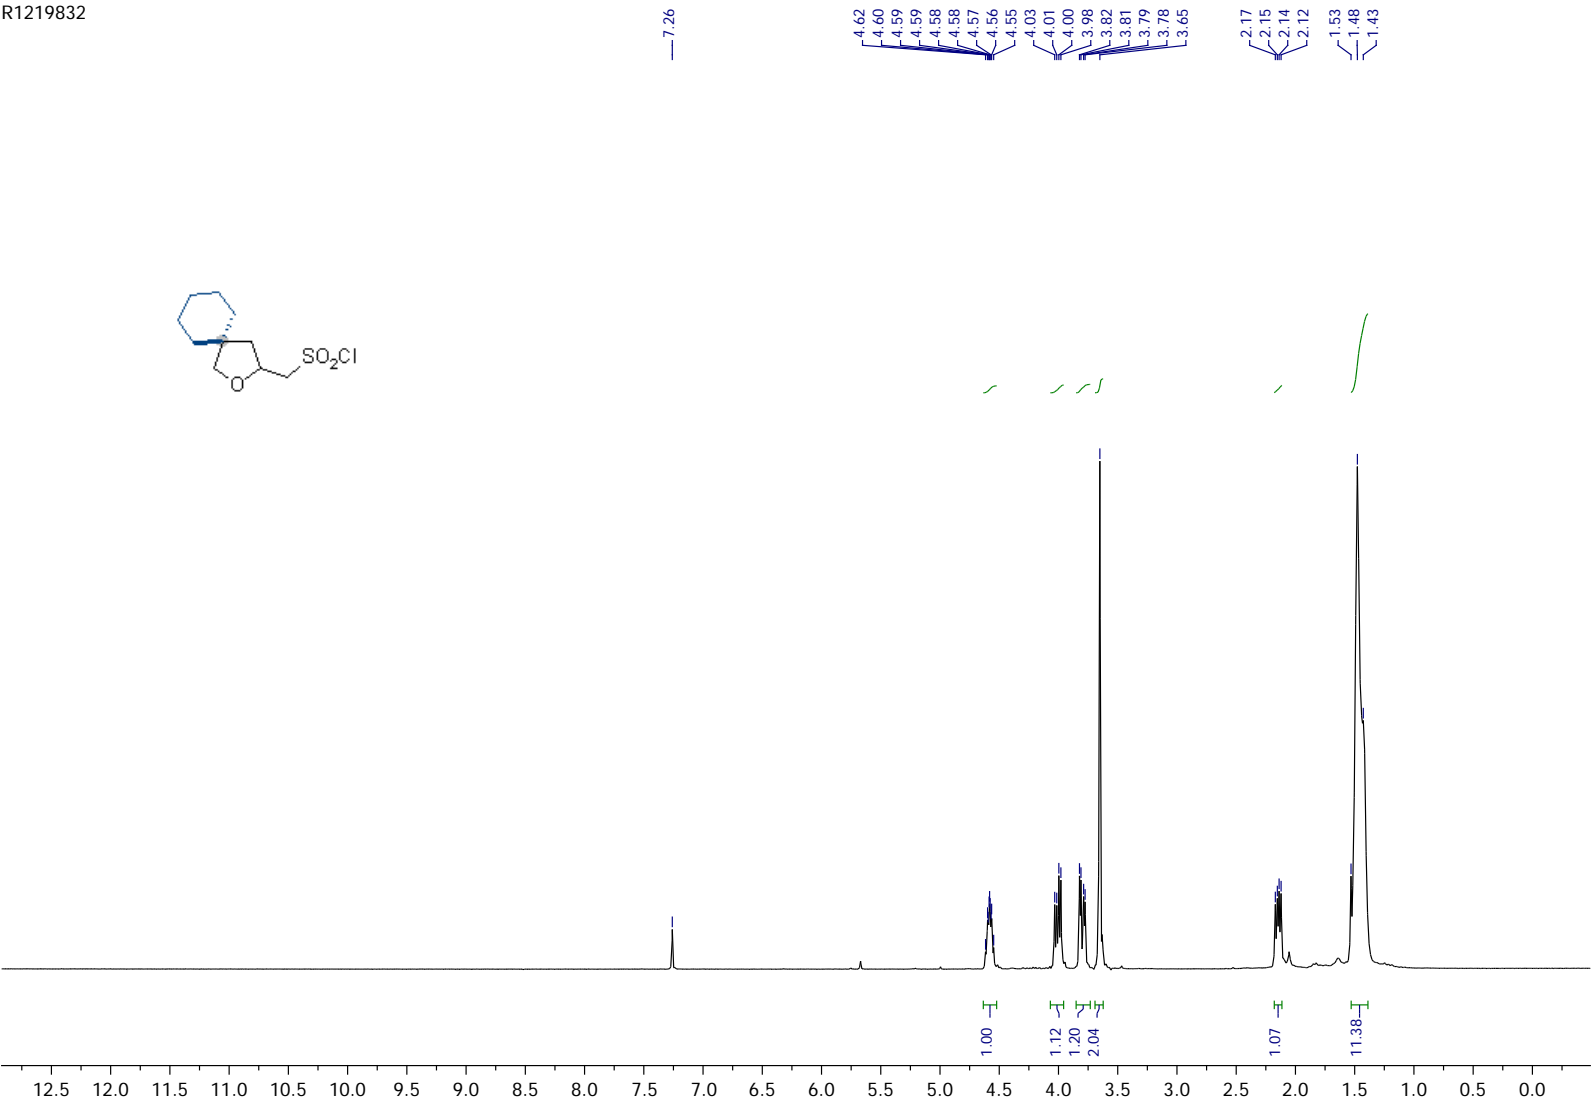

R1219832\_C13

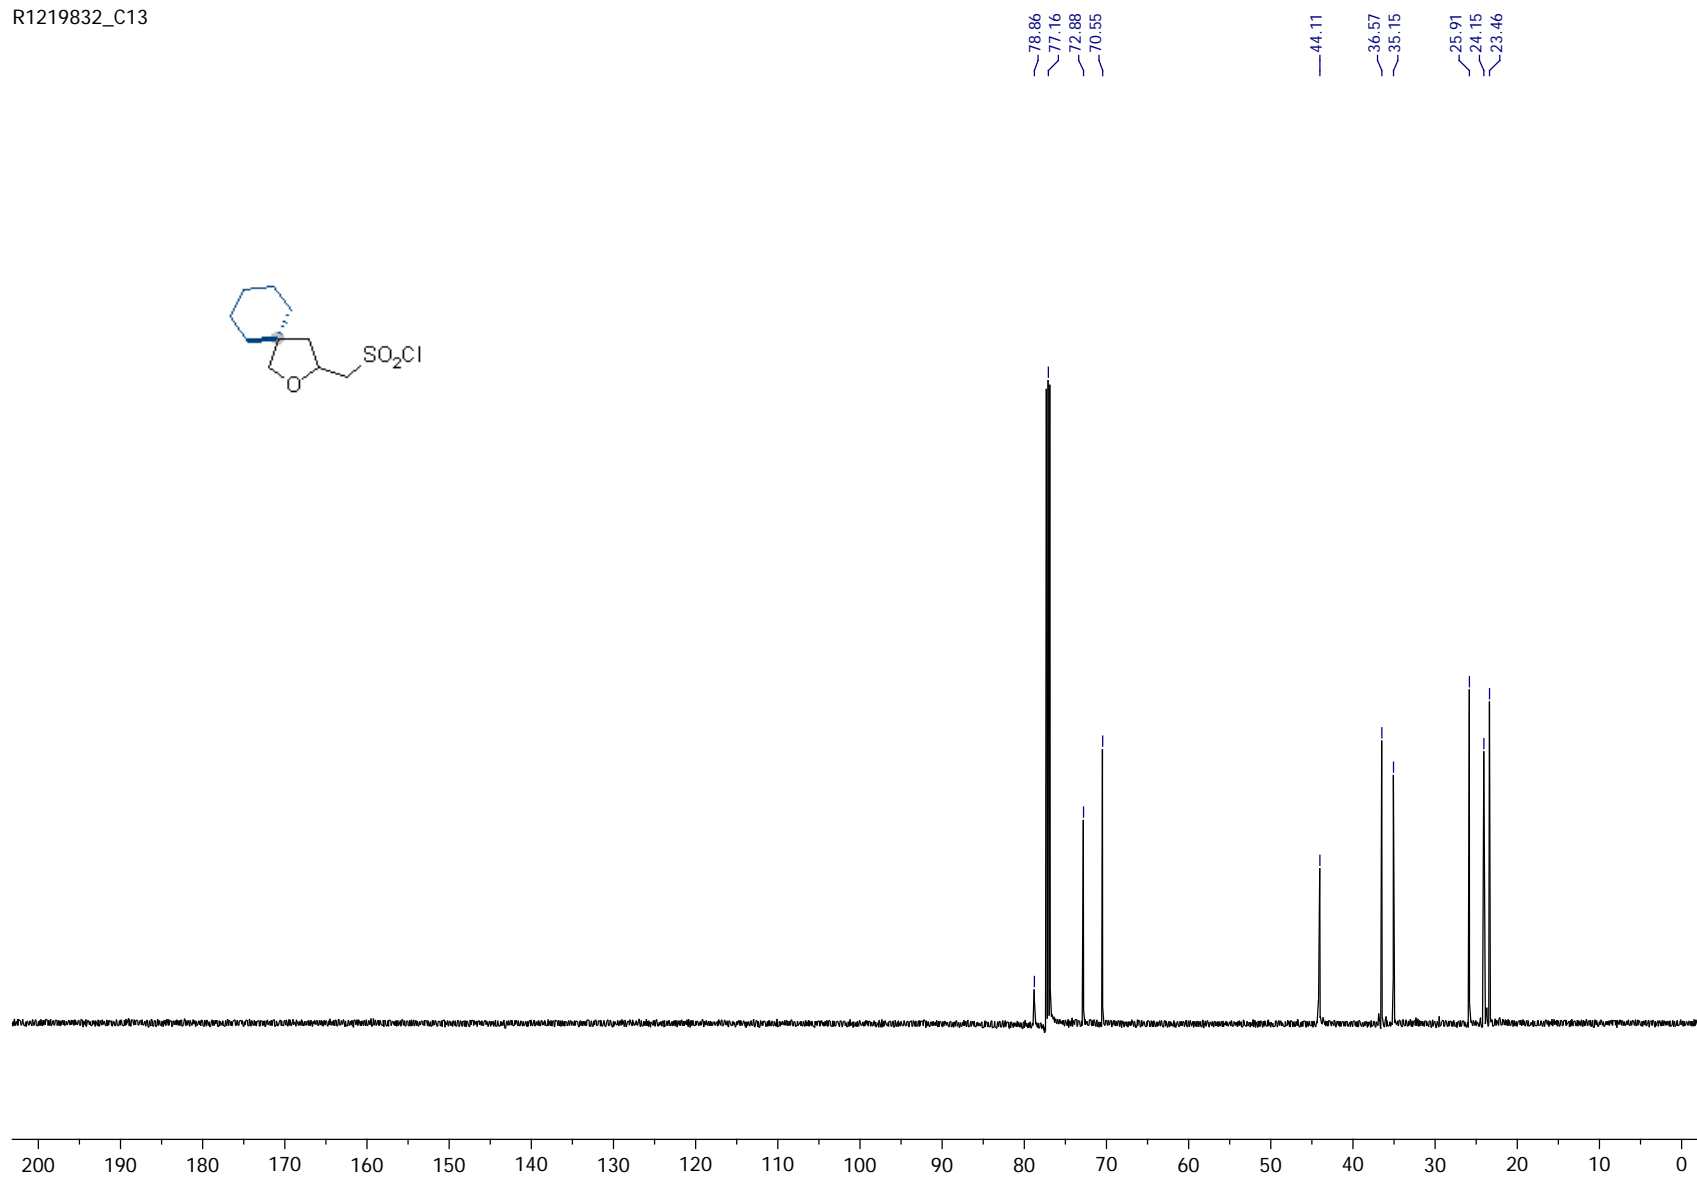



Compound 13e

R1238968

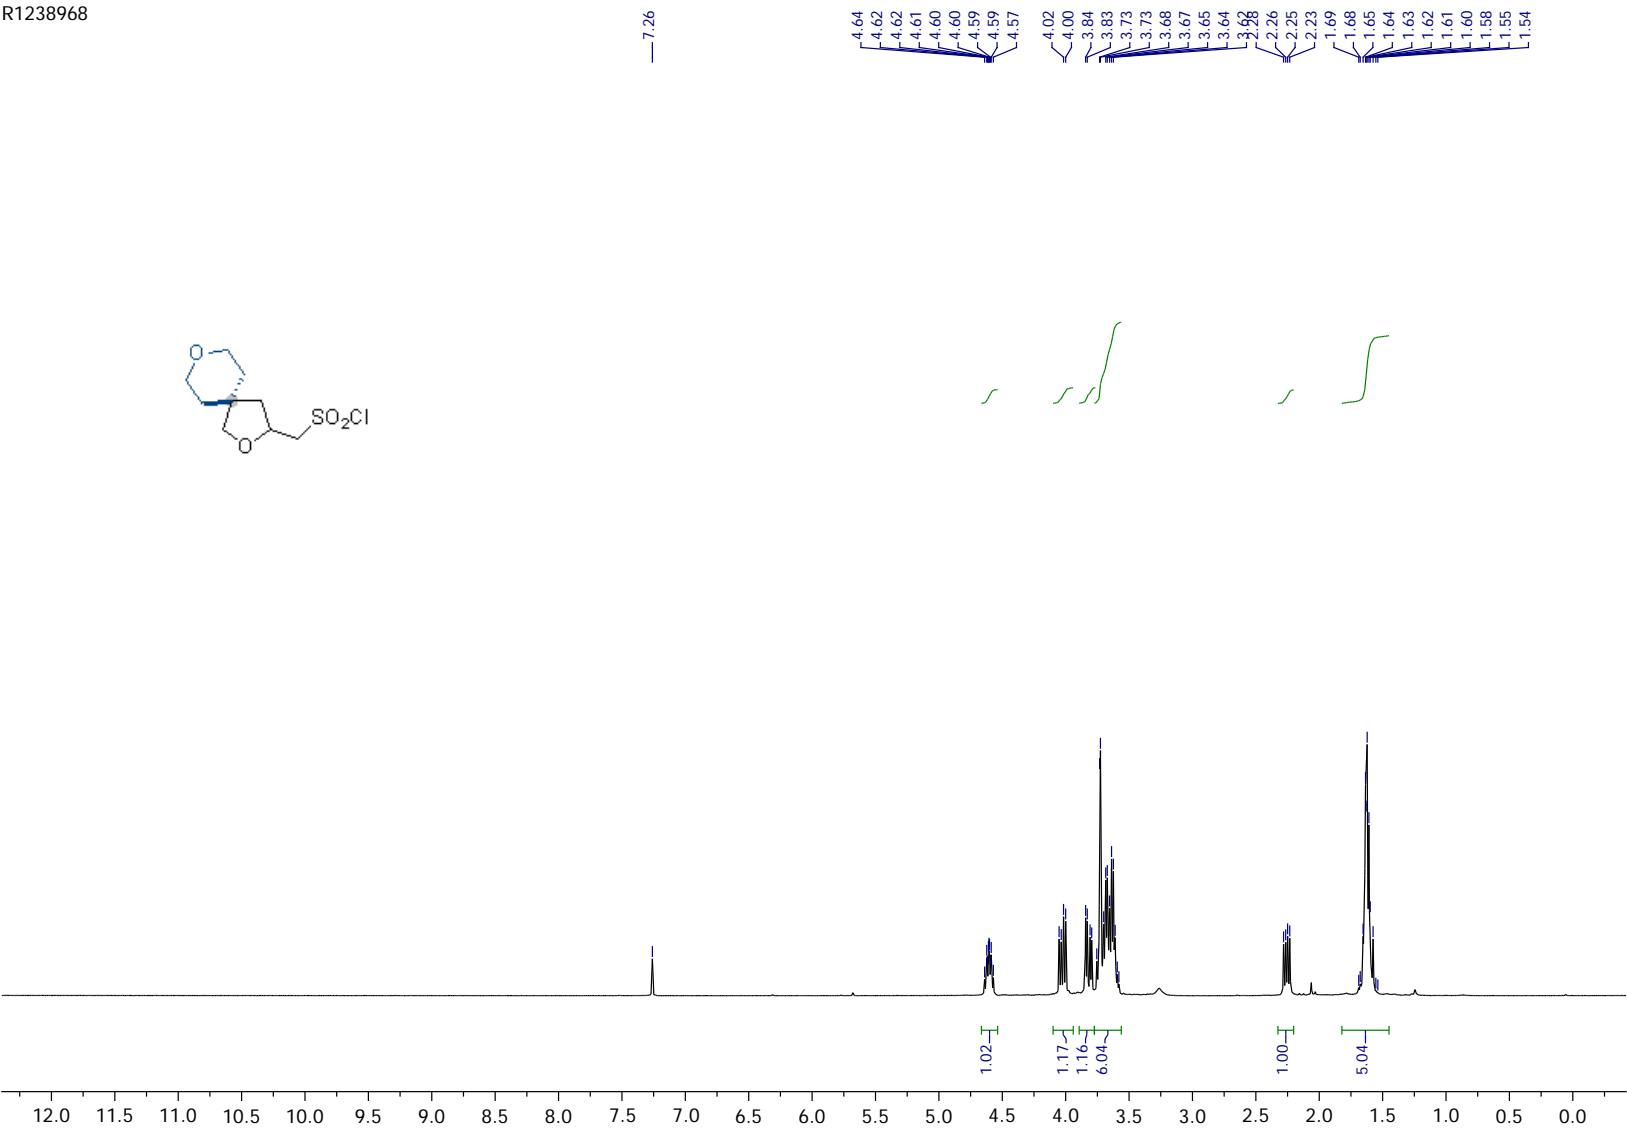

R1238968\_C13

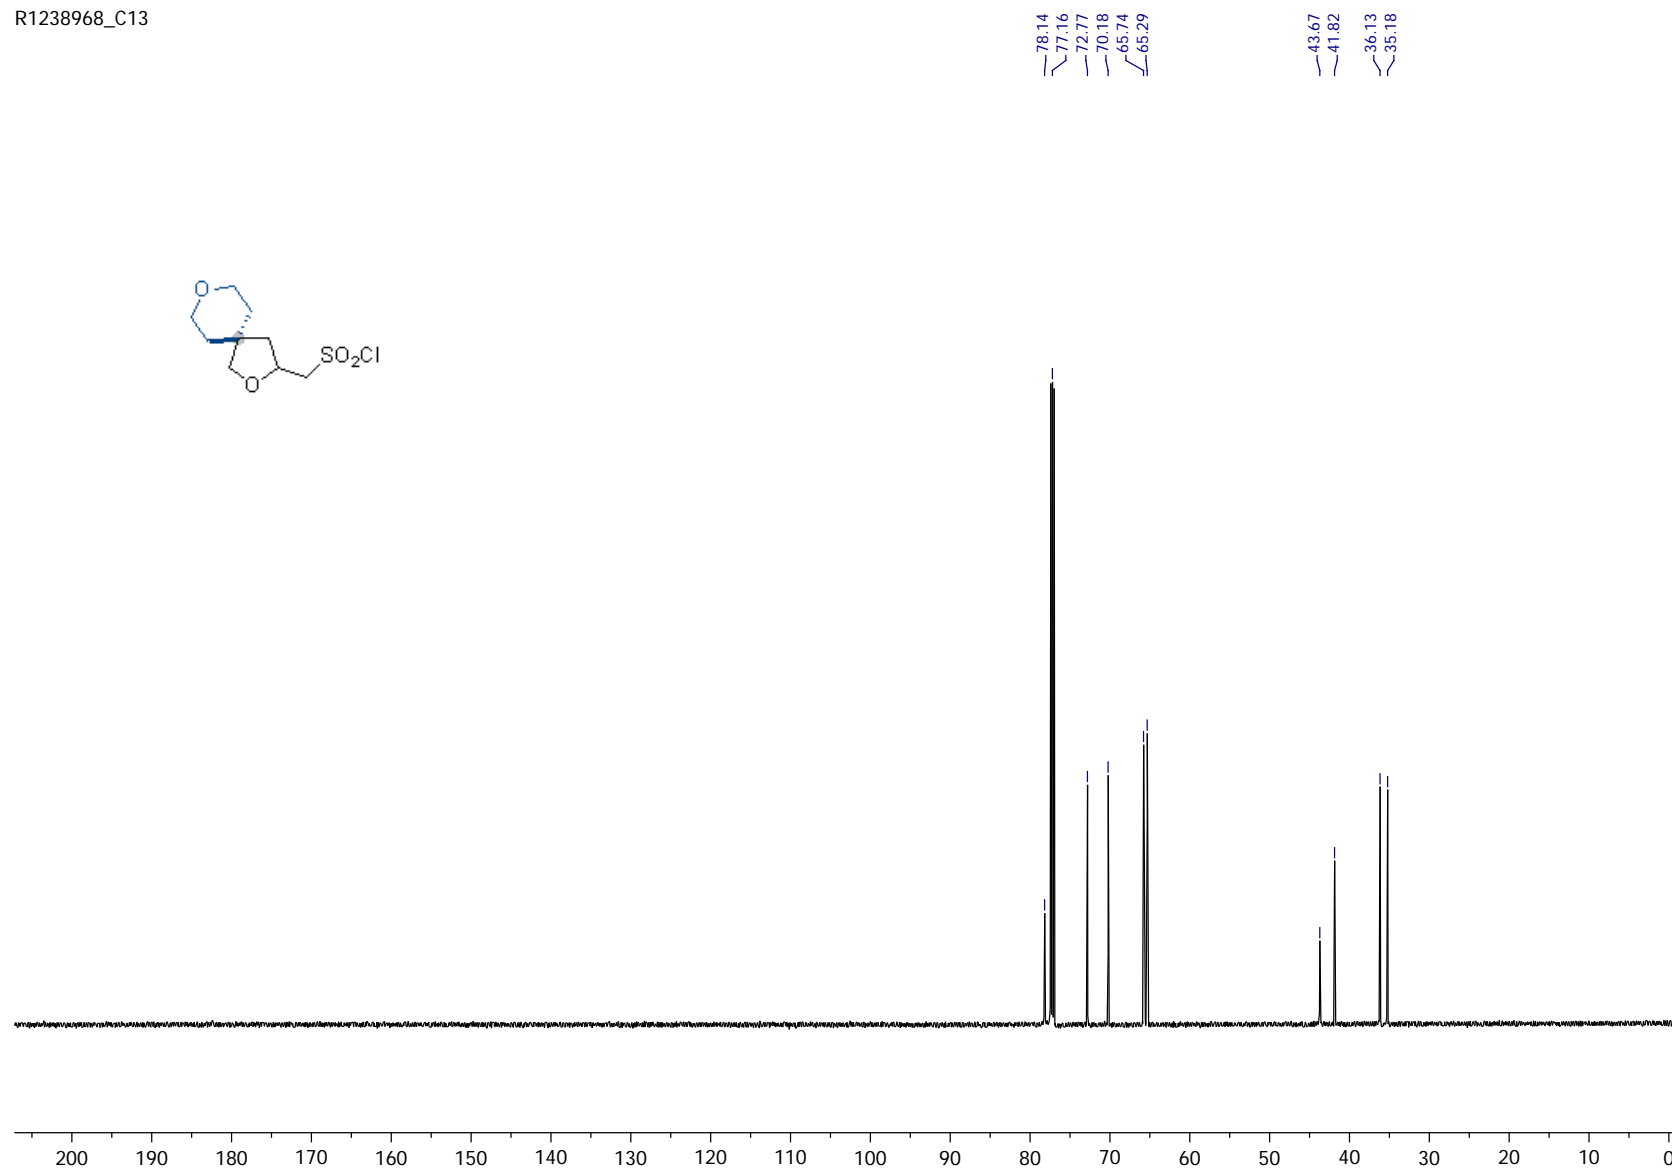

# Compound 16e

R1171528

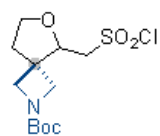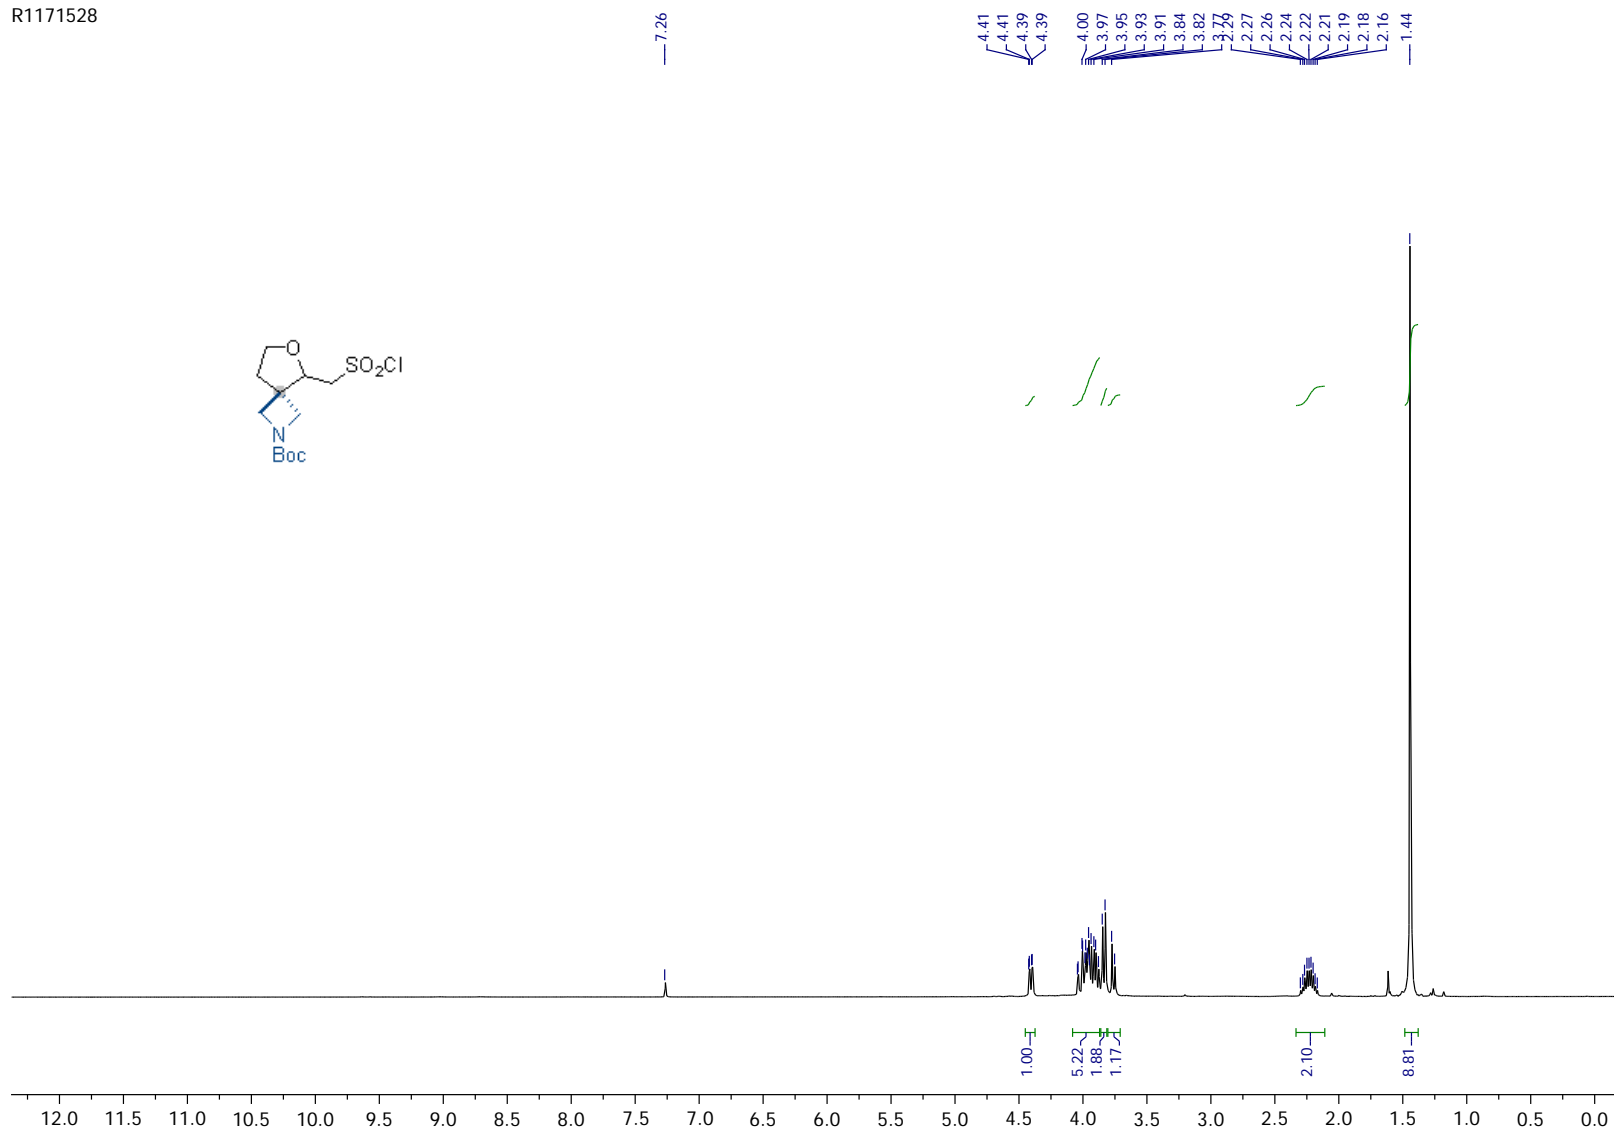

R1171528\_C13\_T

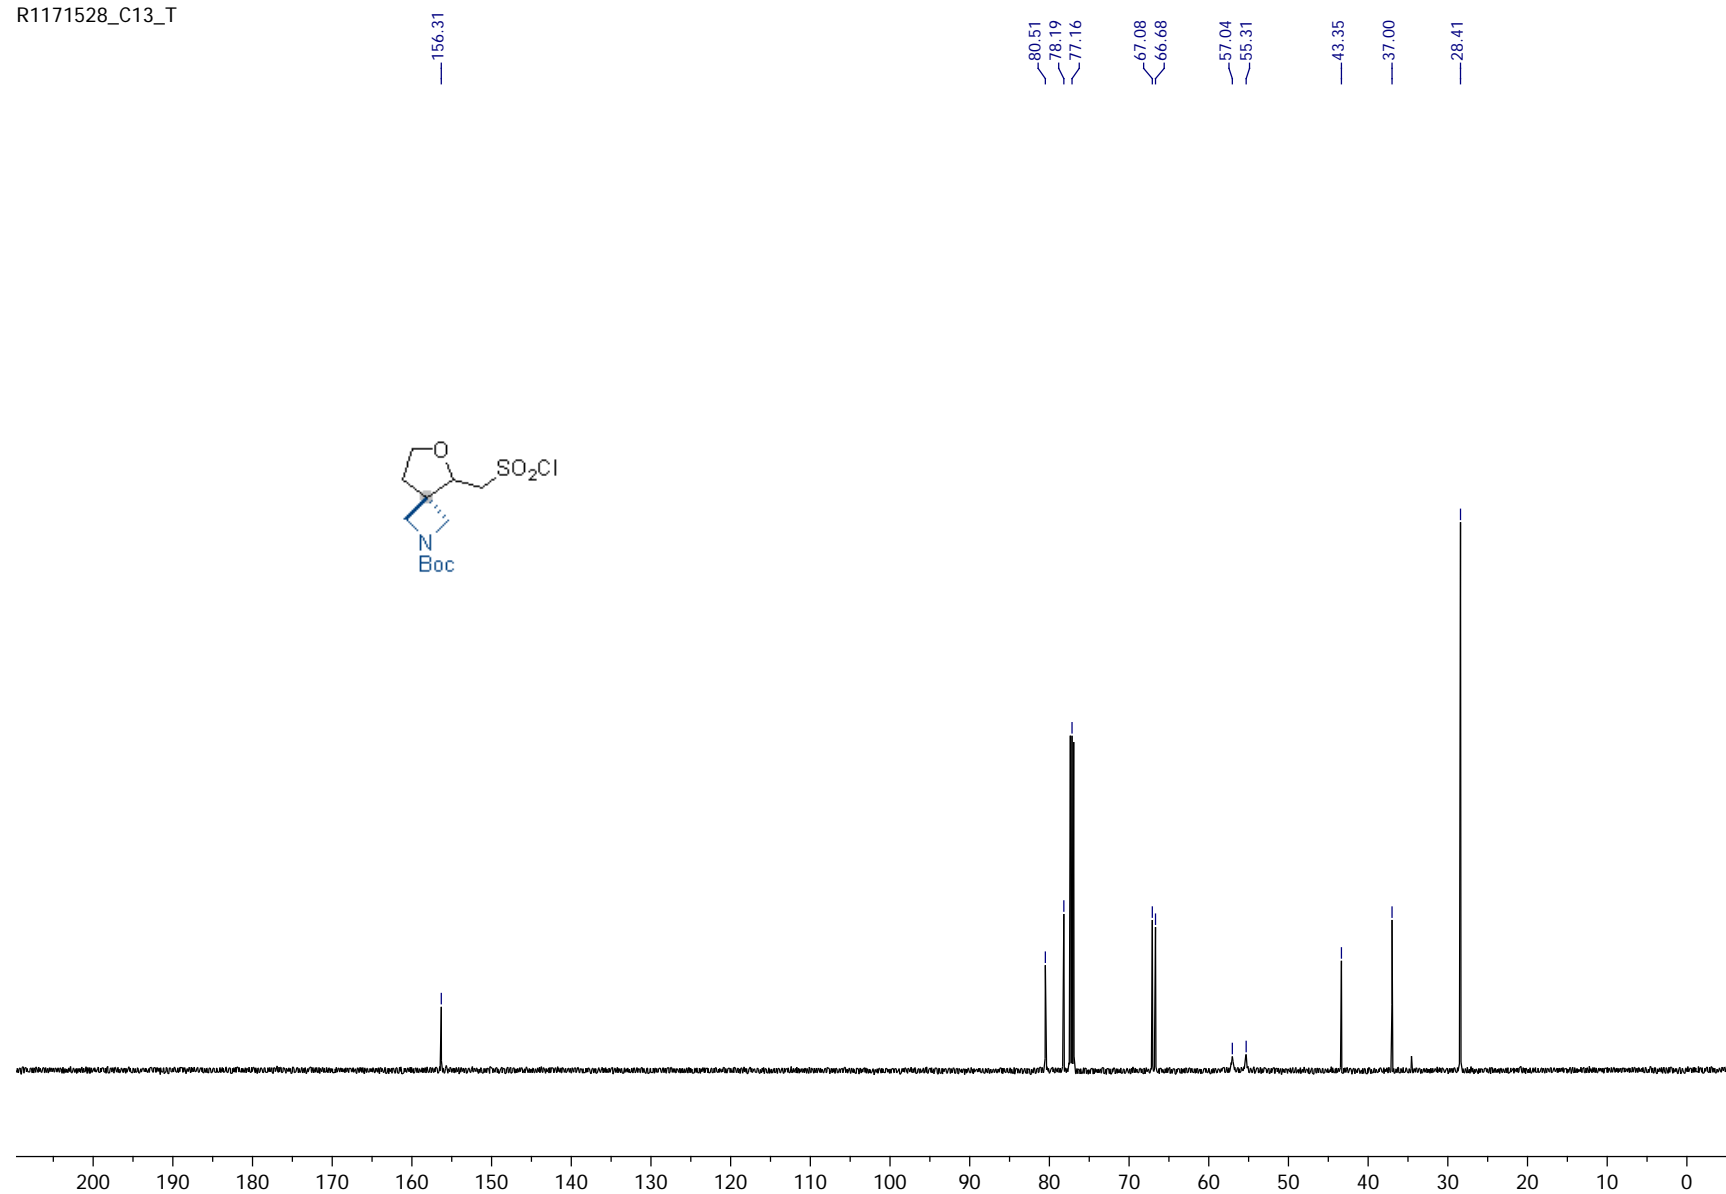

# Compound 18e

R892368

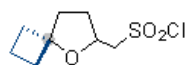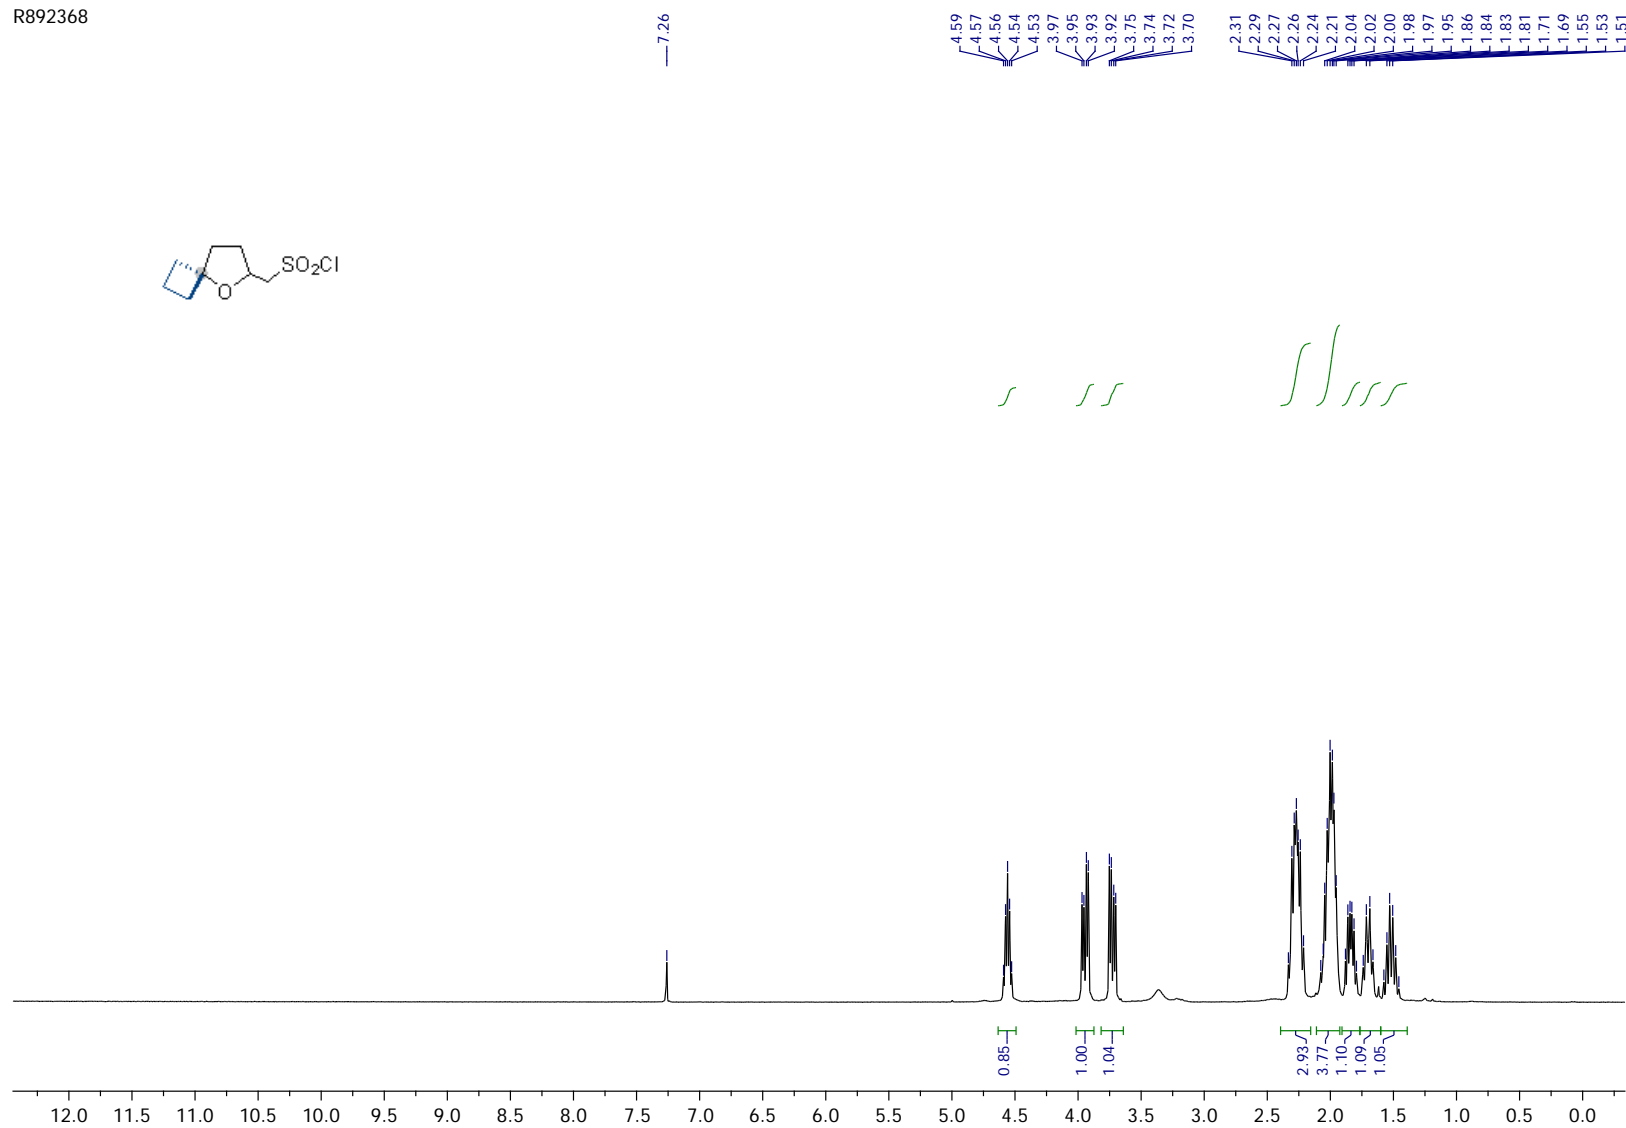

R892368\_C13

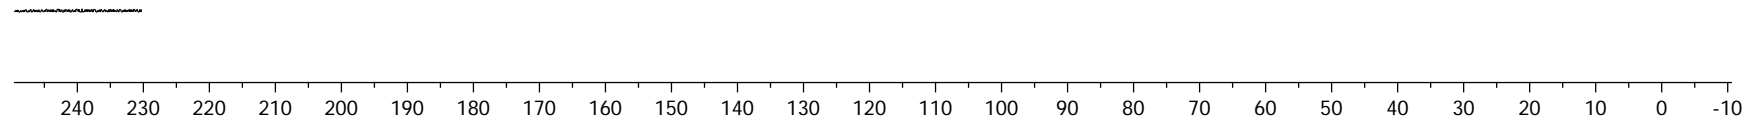

Compound 21e

R1406085

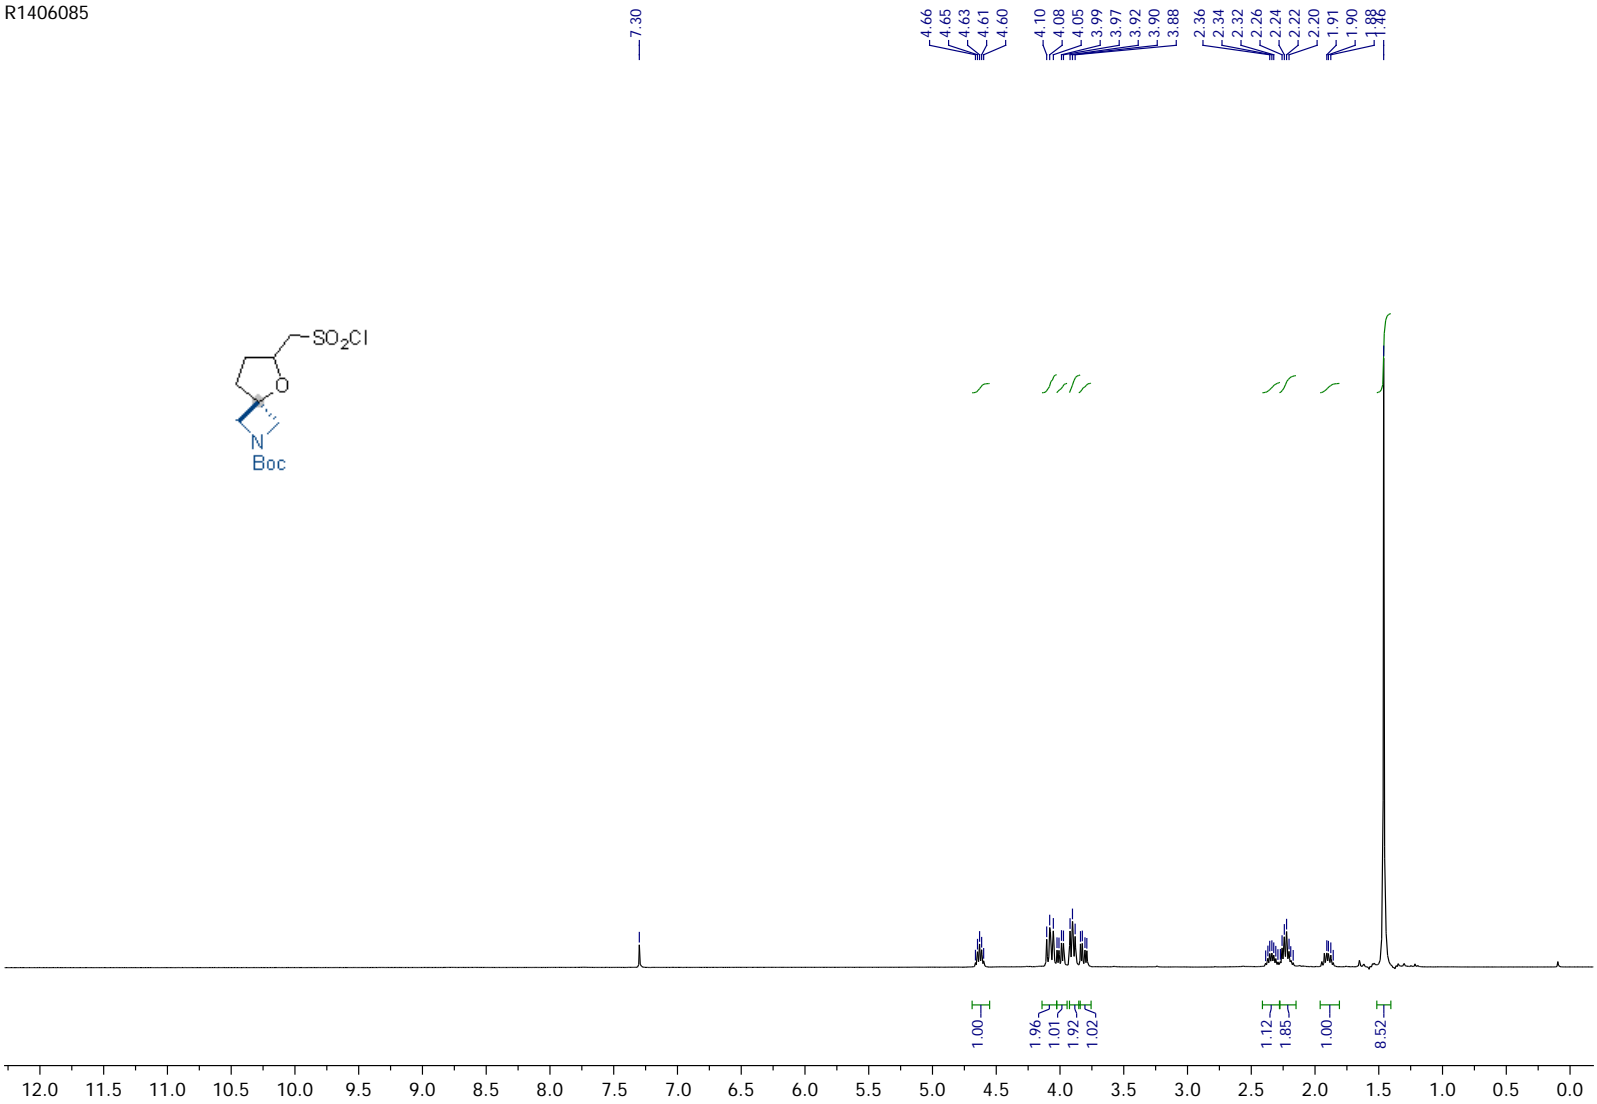

R1406085\_C13

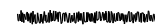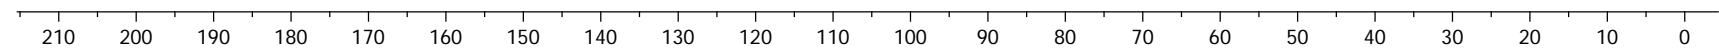



# Compound 22e

R1218175

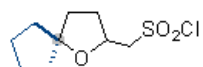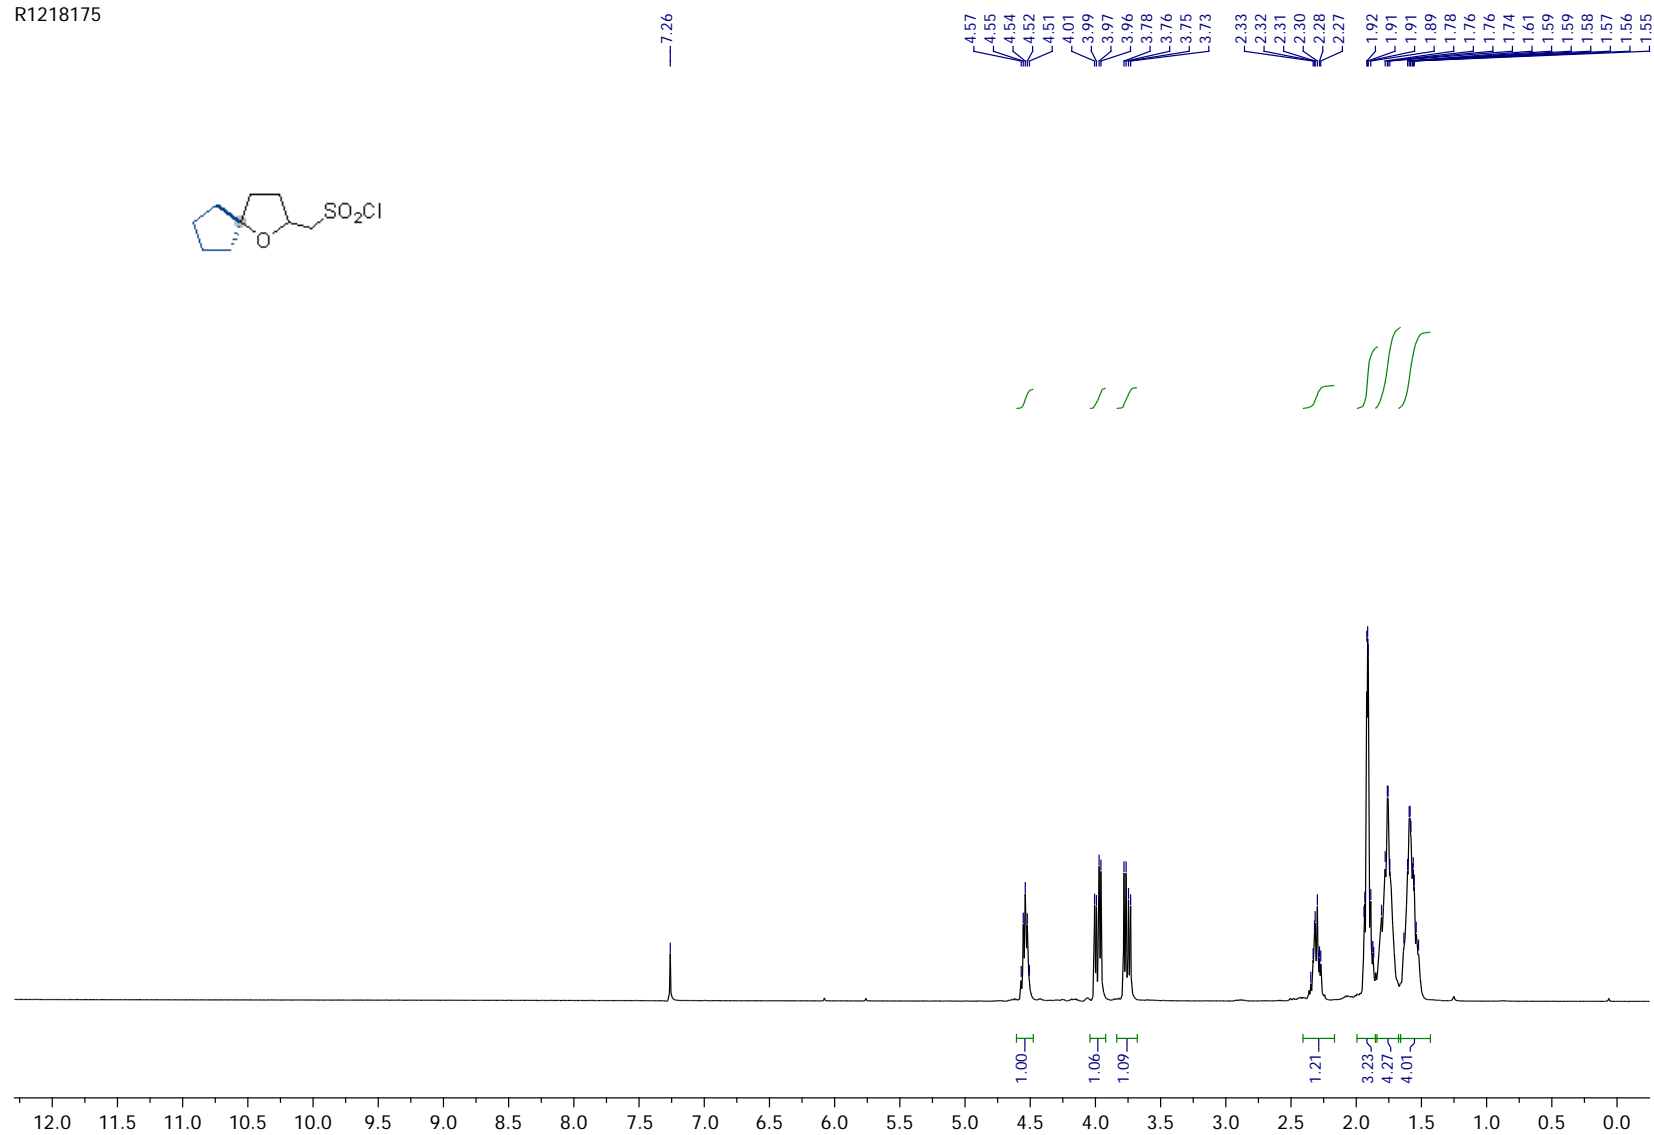

R1218175\_C13

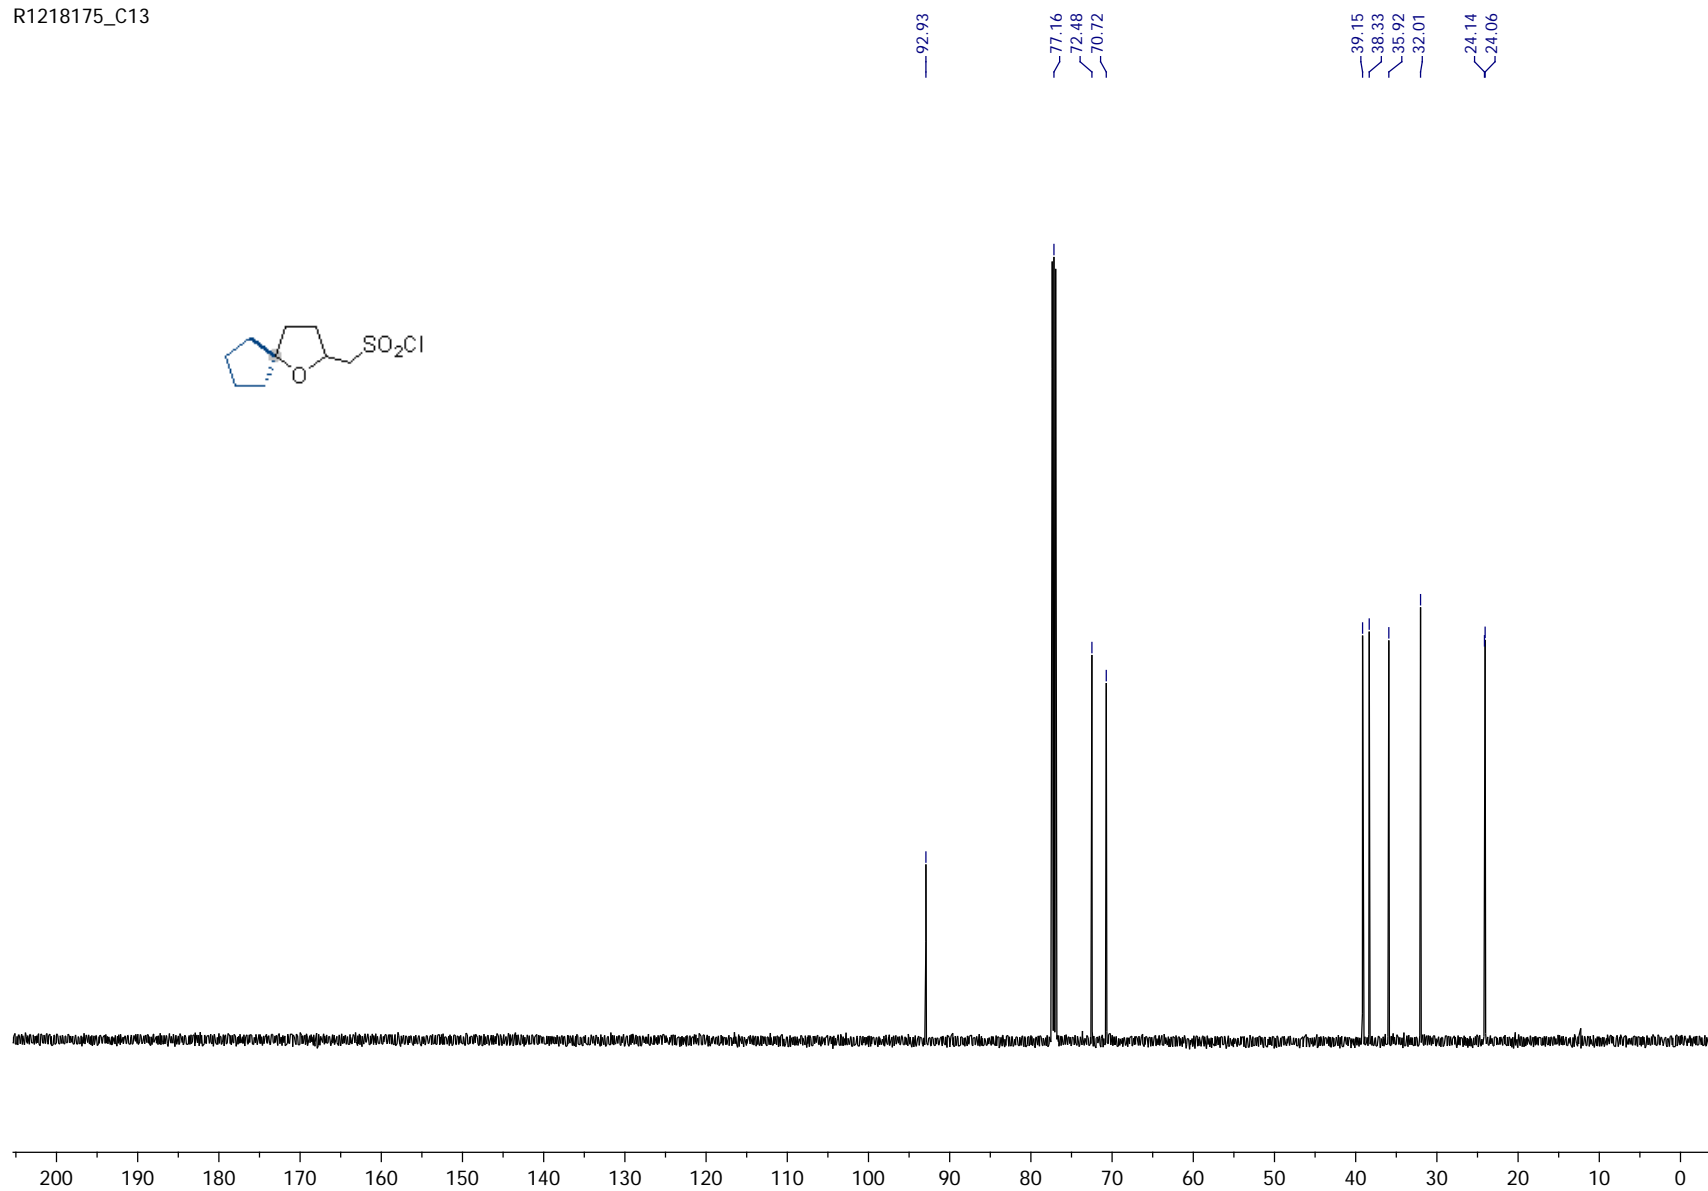

# Compound 23e

R1211308

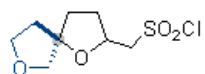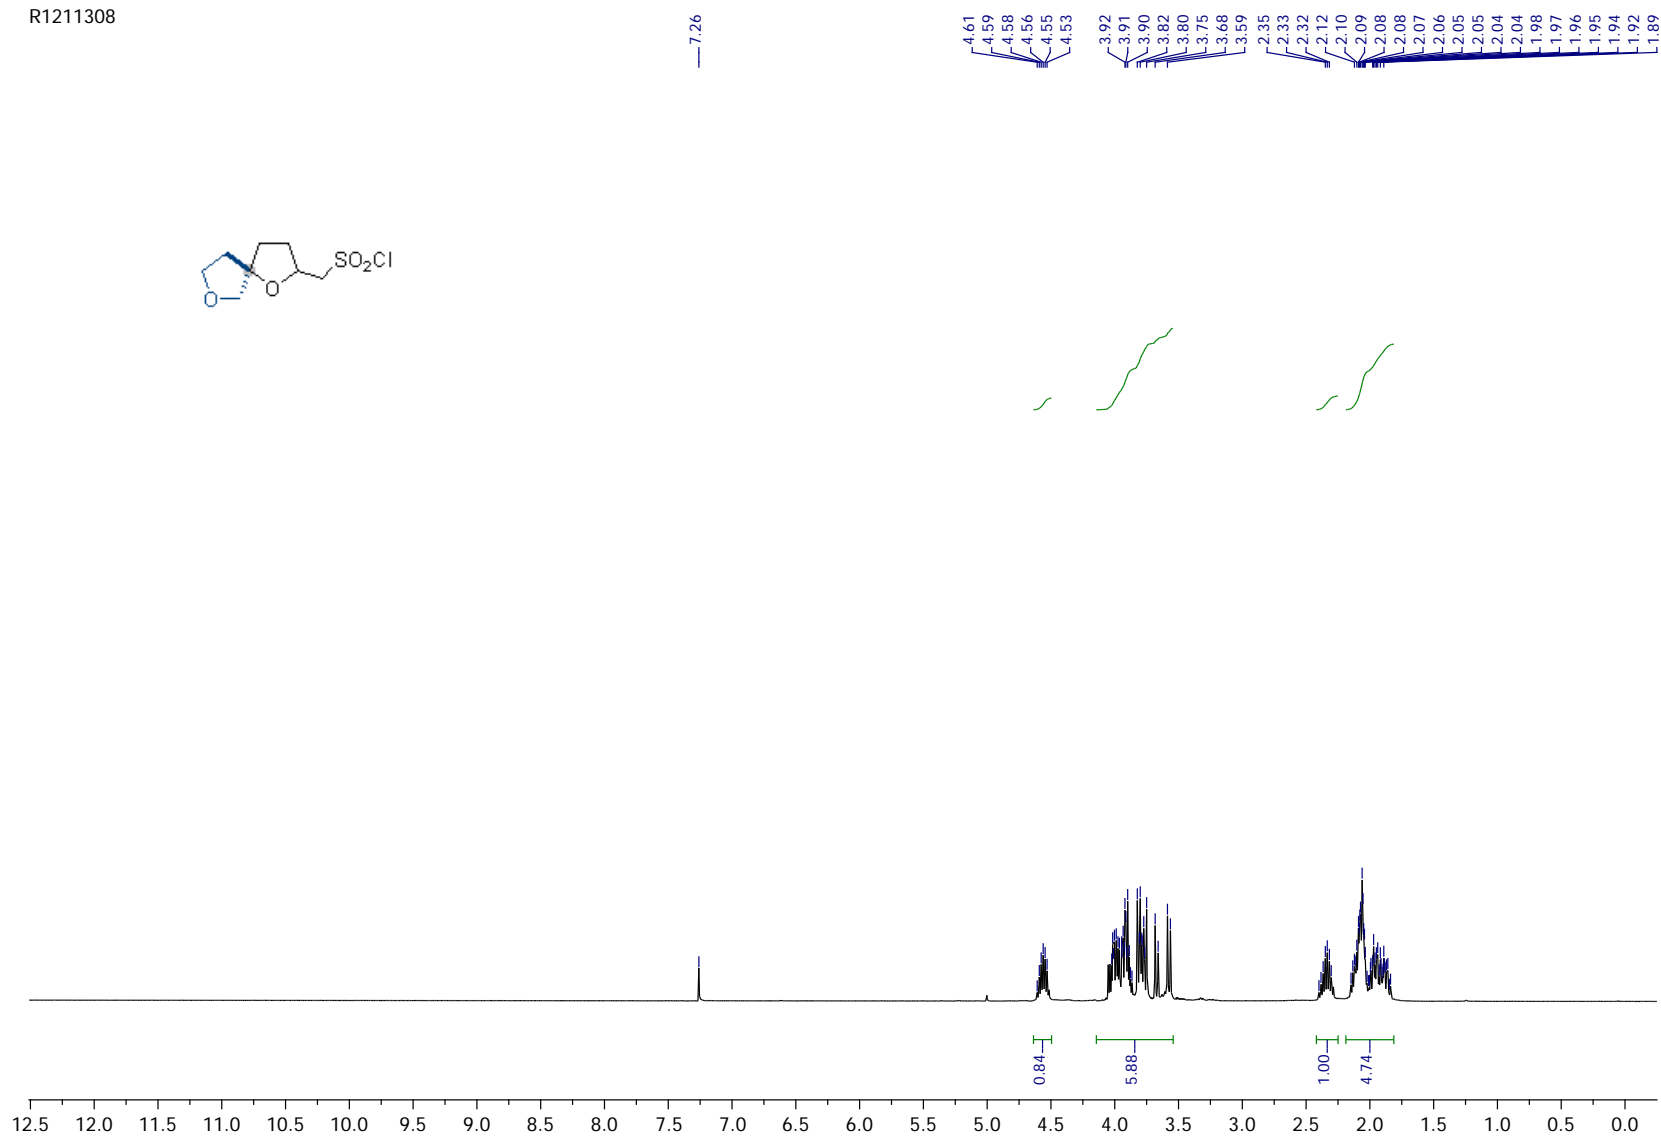

R1211308\_C13

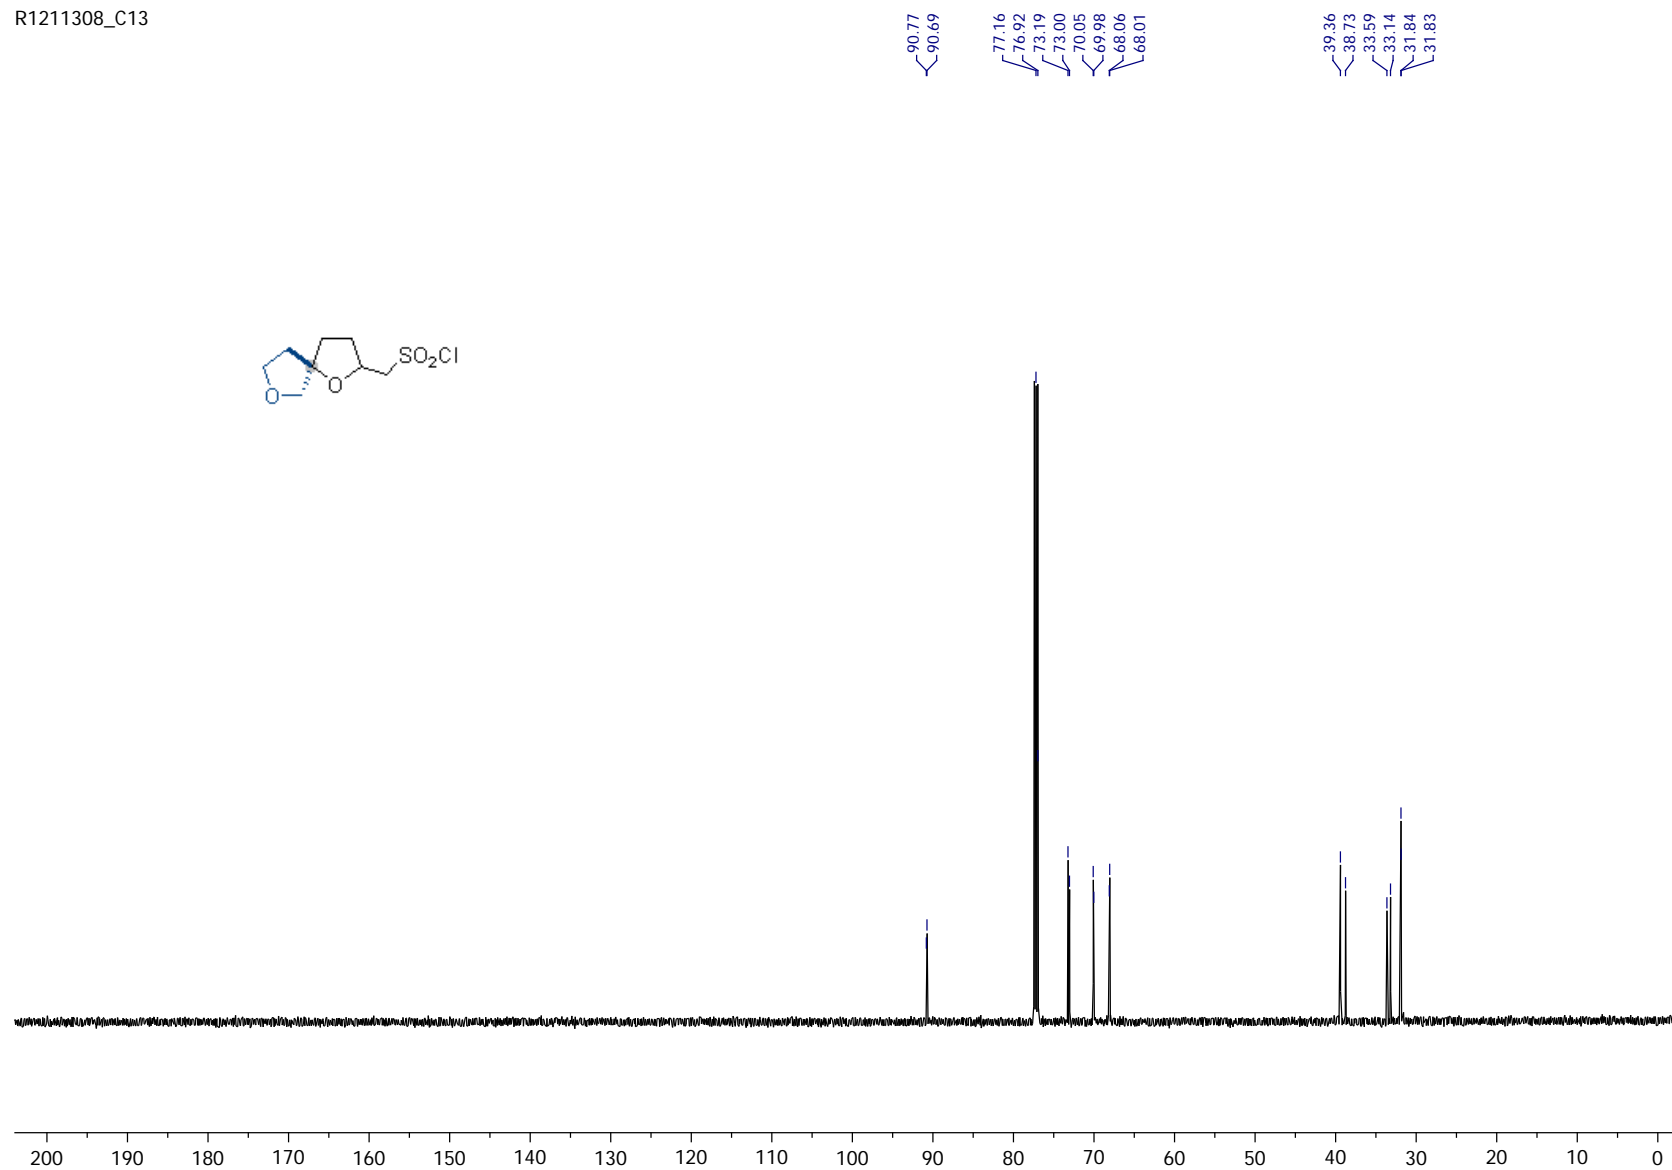

# Compound 24e

R1230559

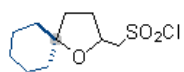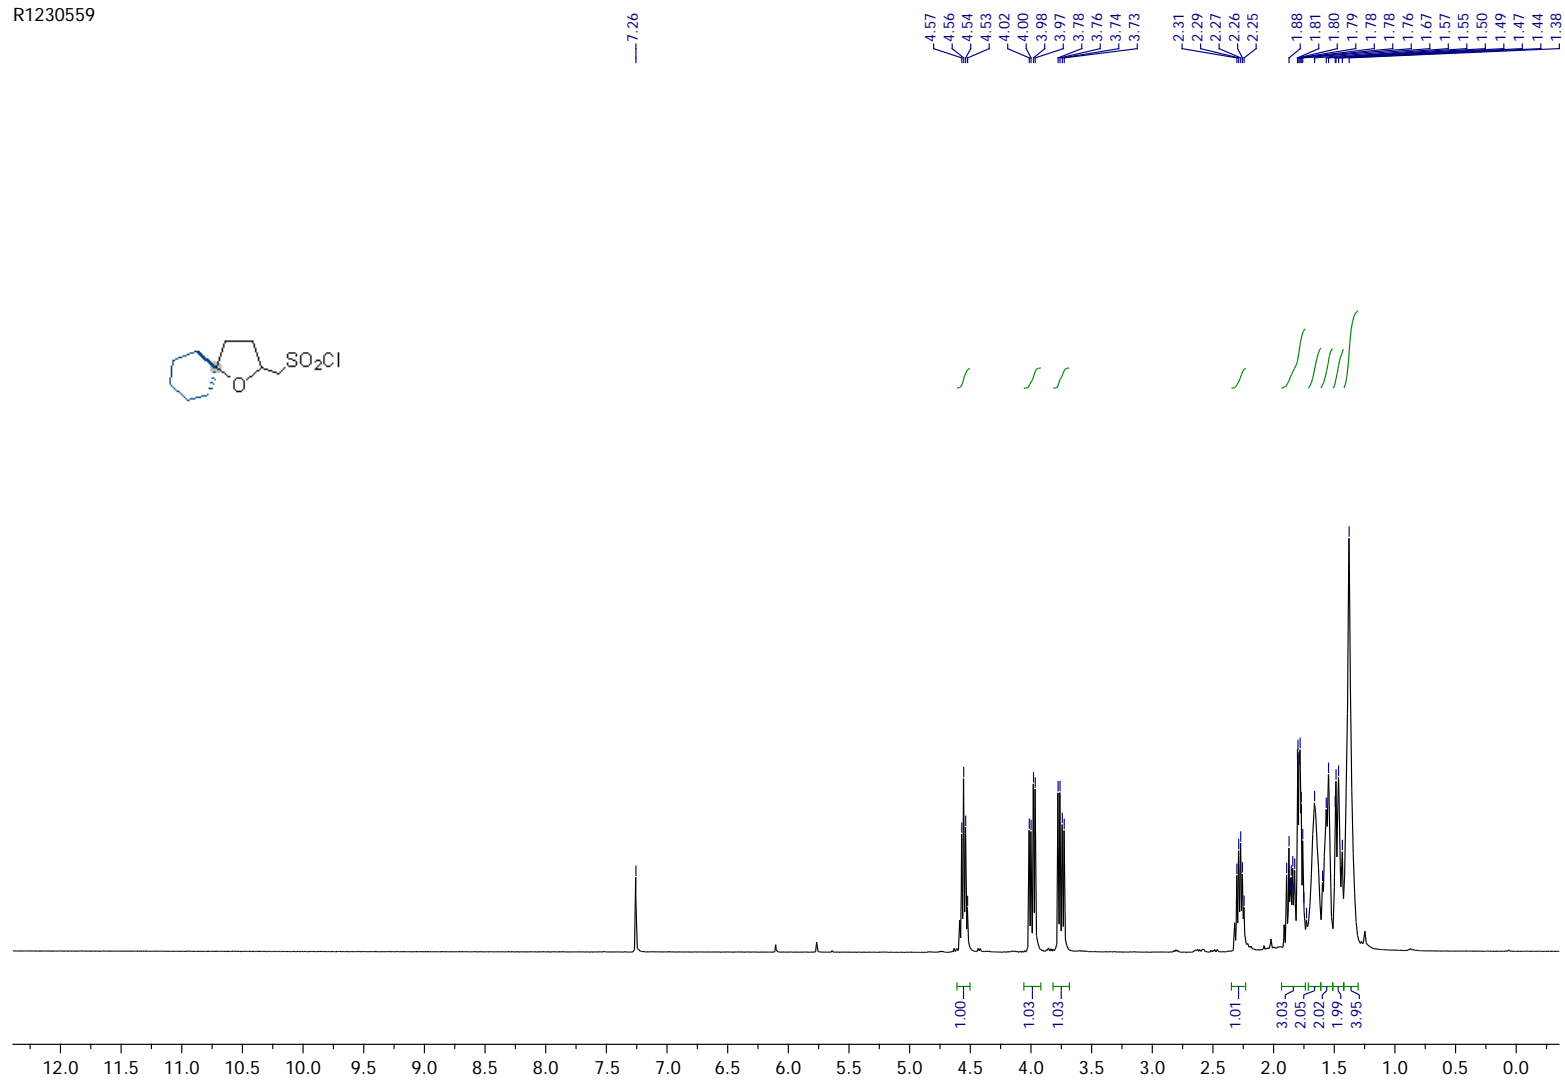

R1230559\_C13

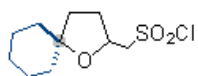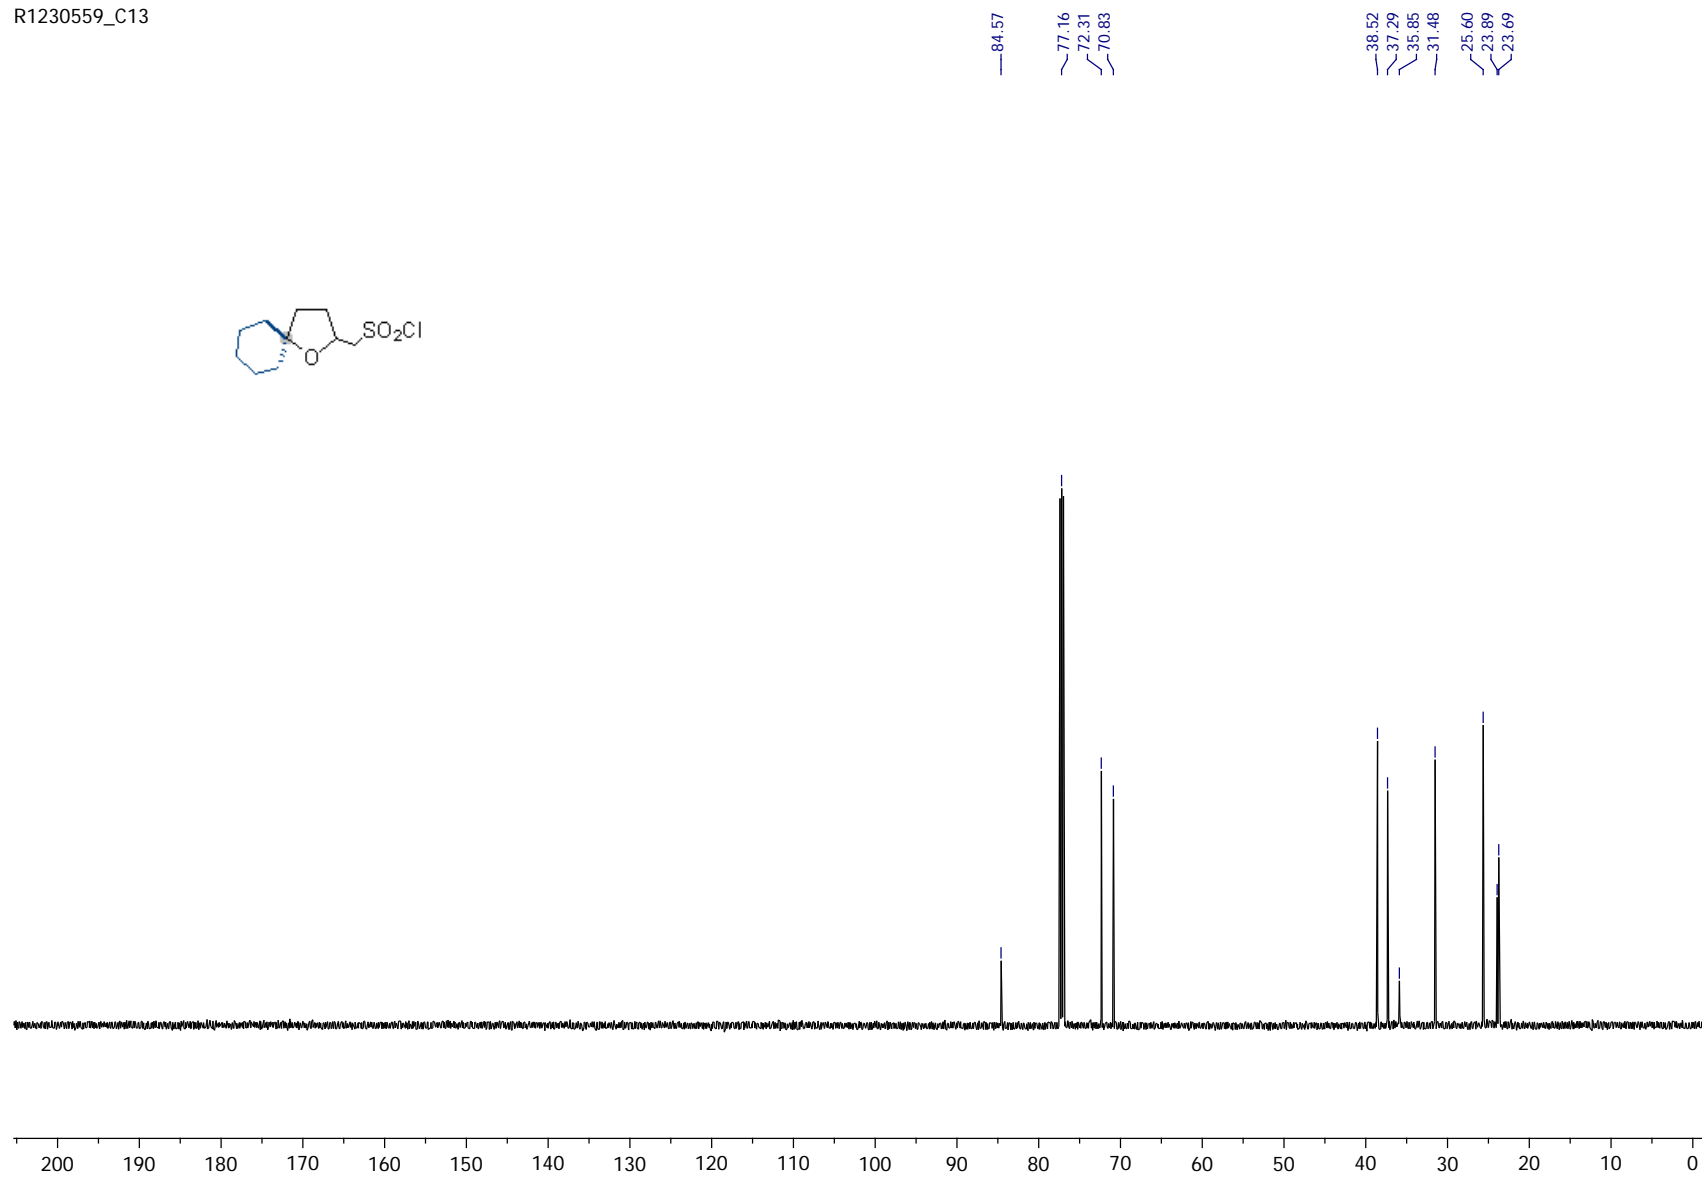

Compound 27e

R1360121

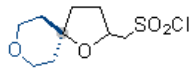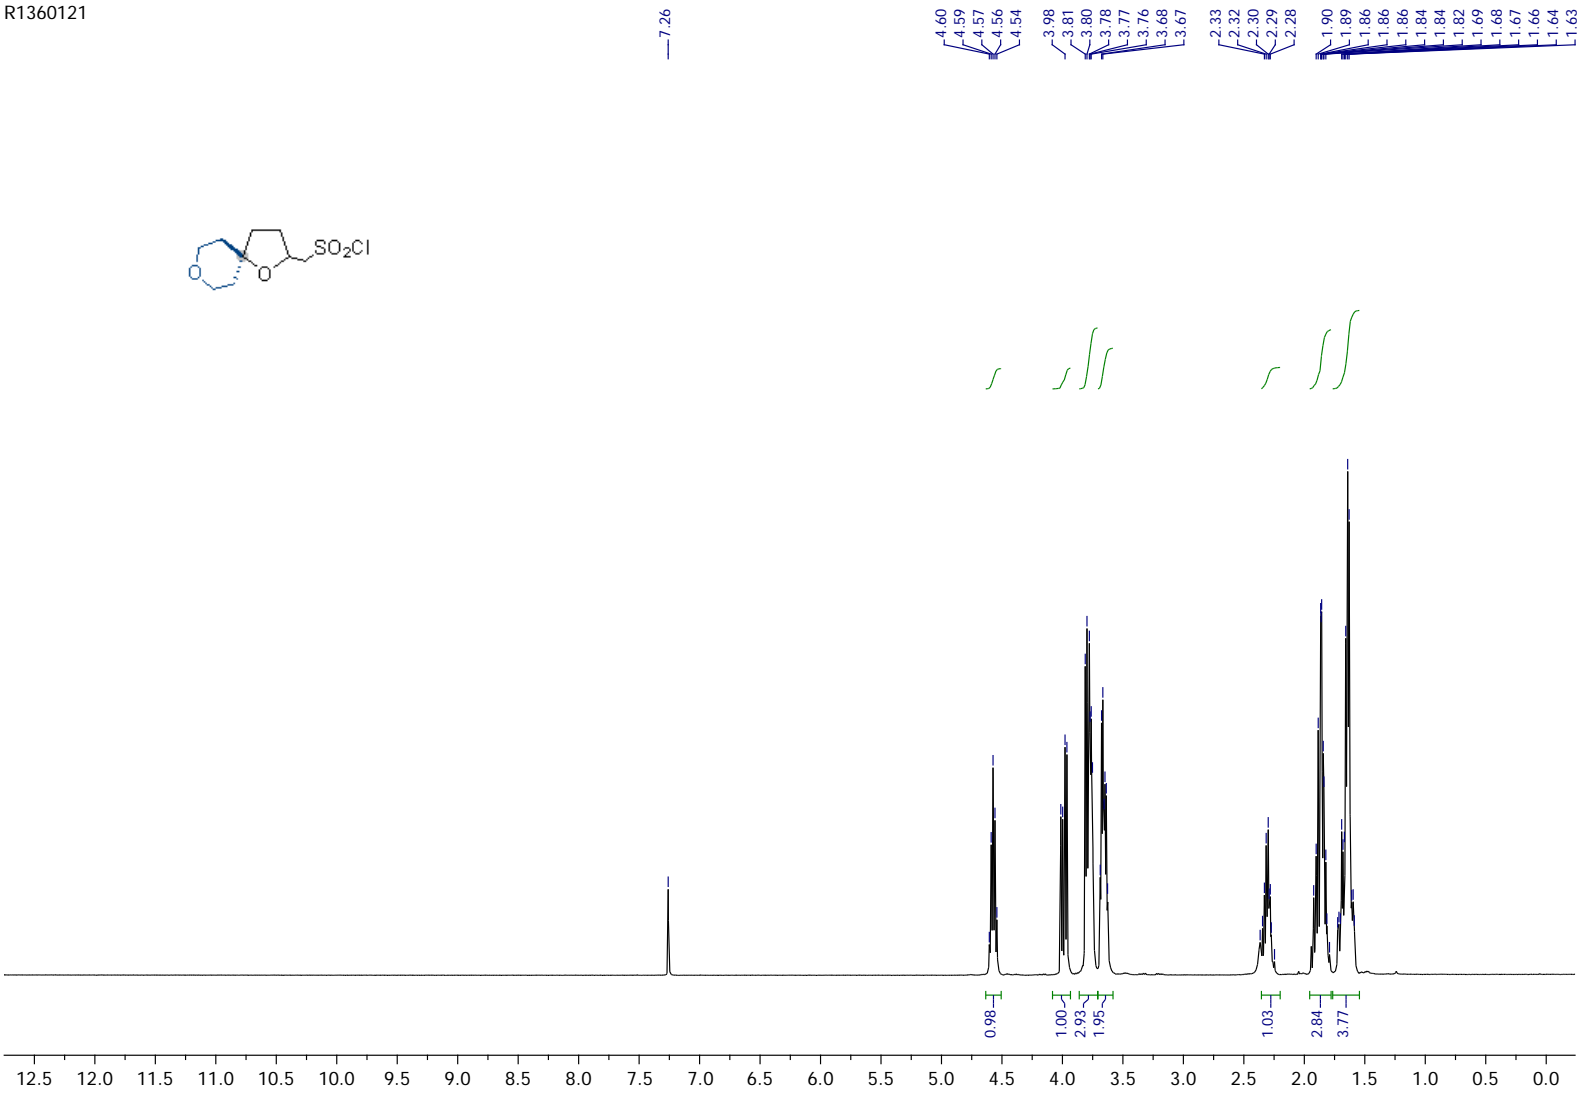

R1360121\_C13

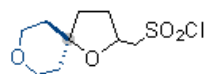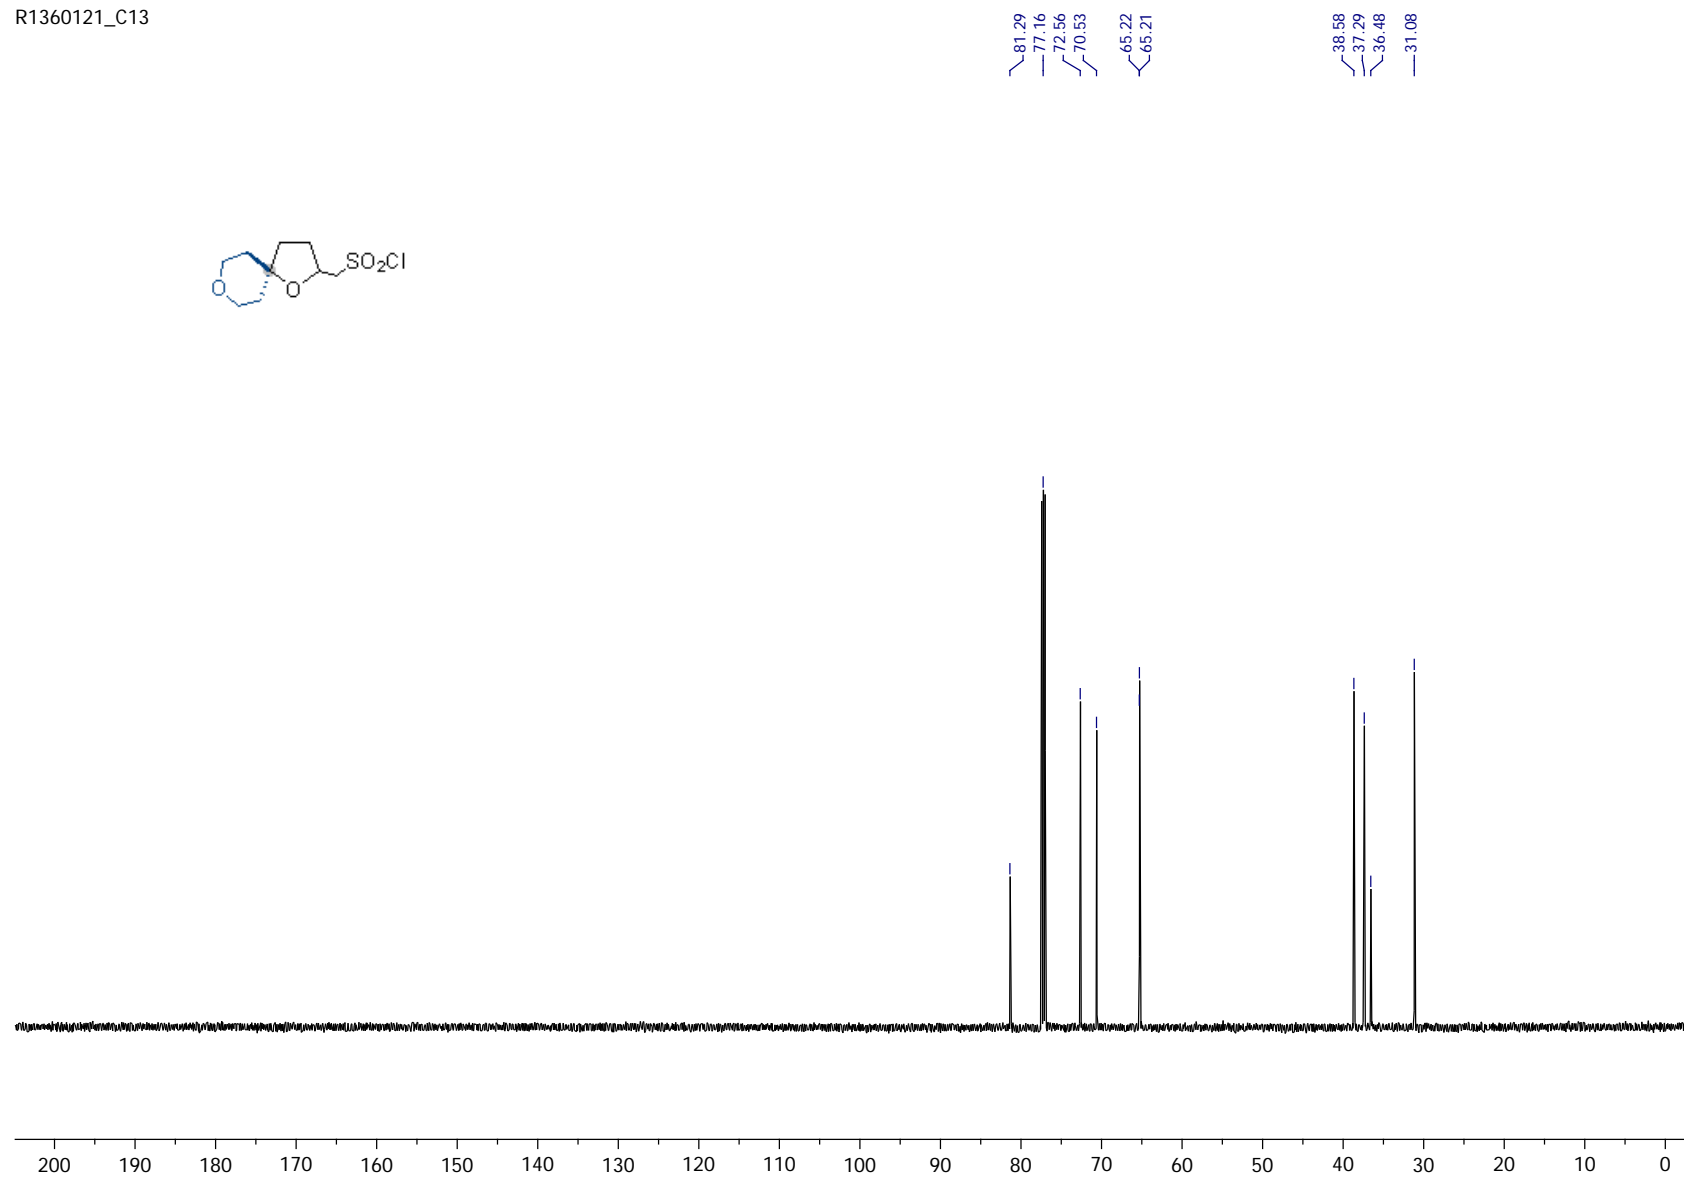



Compound 30e

R1339435

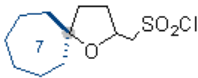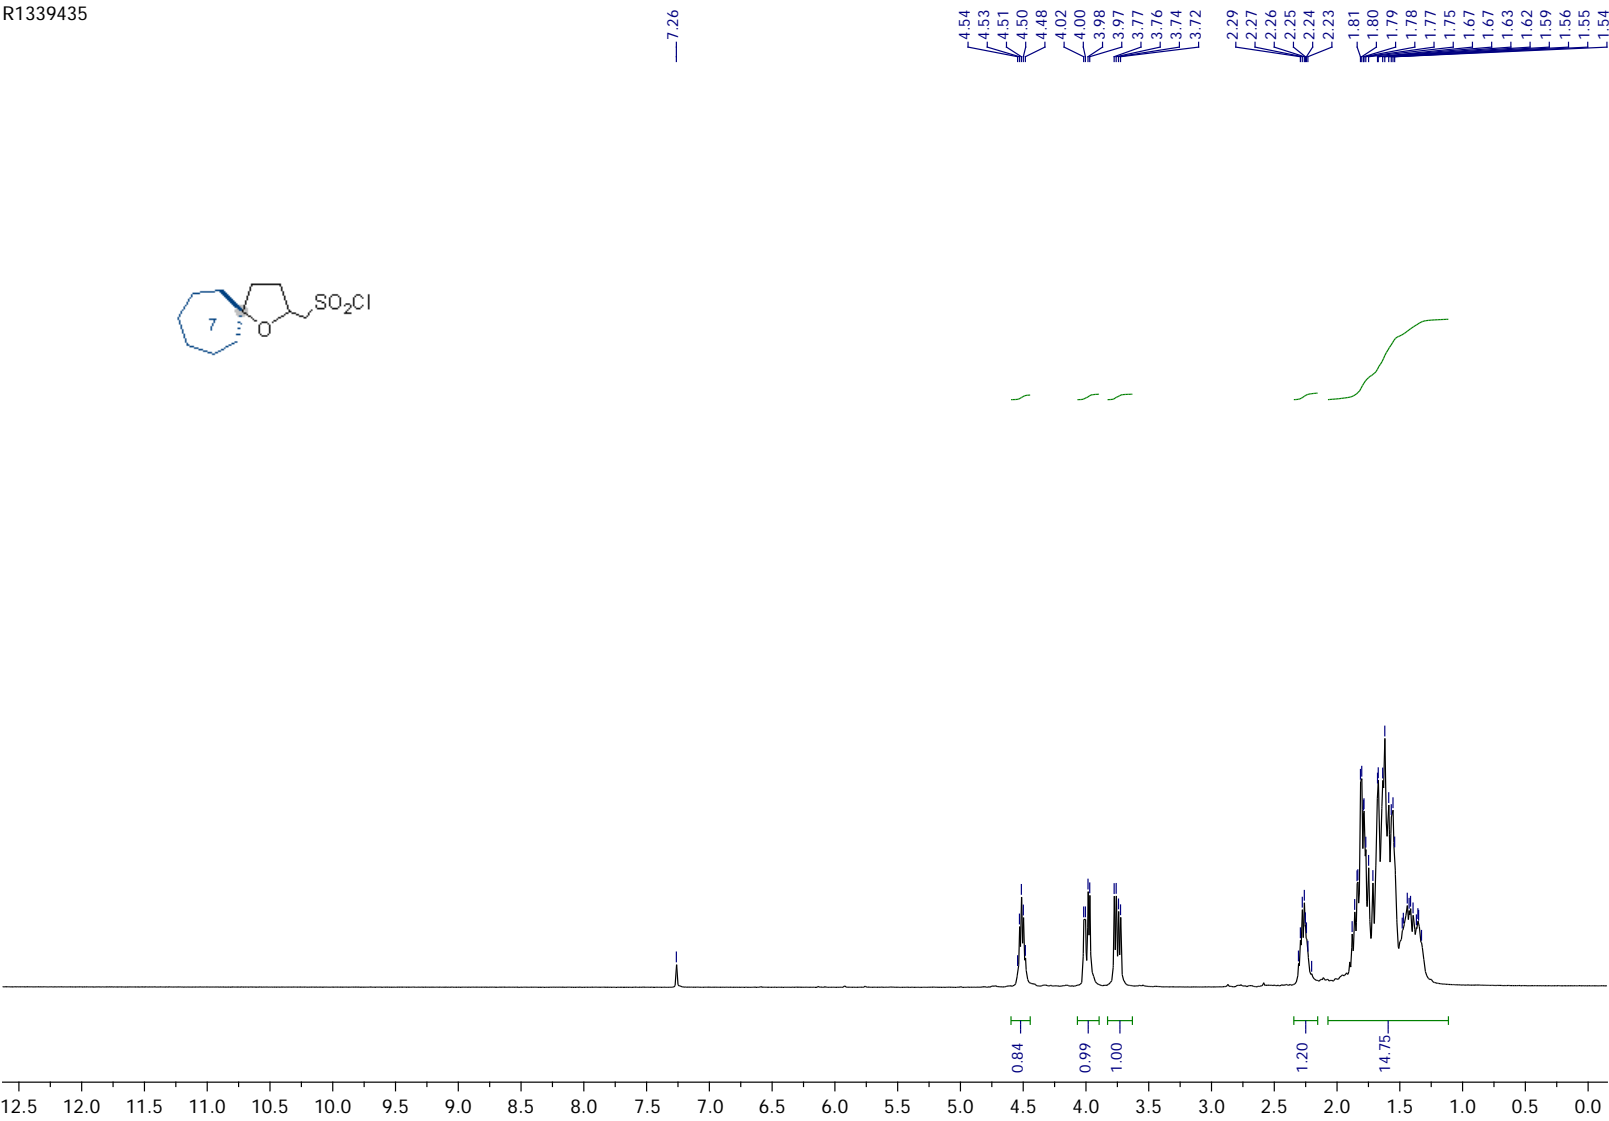

R1339435\_13C

|||||

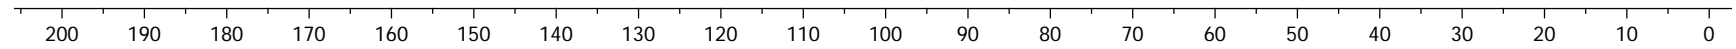

Compound 36e

R824258

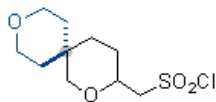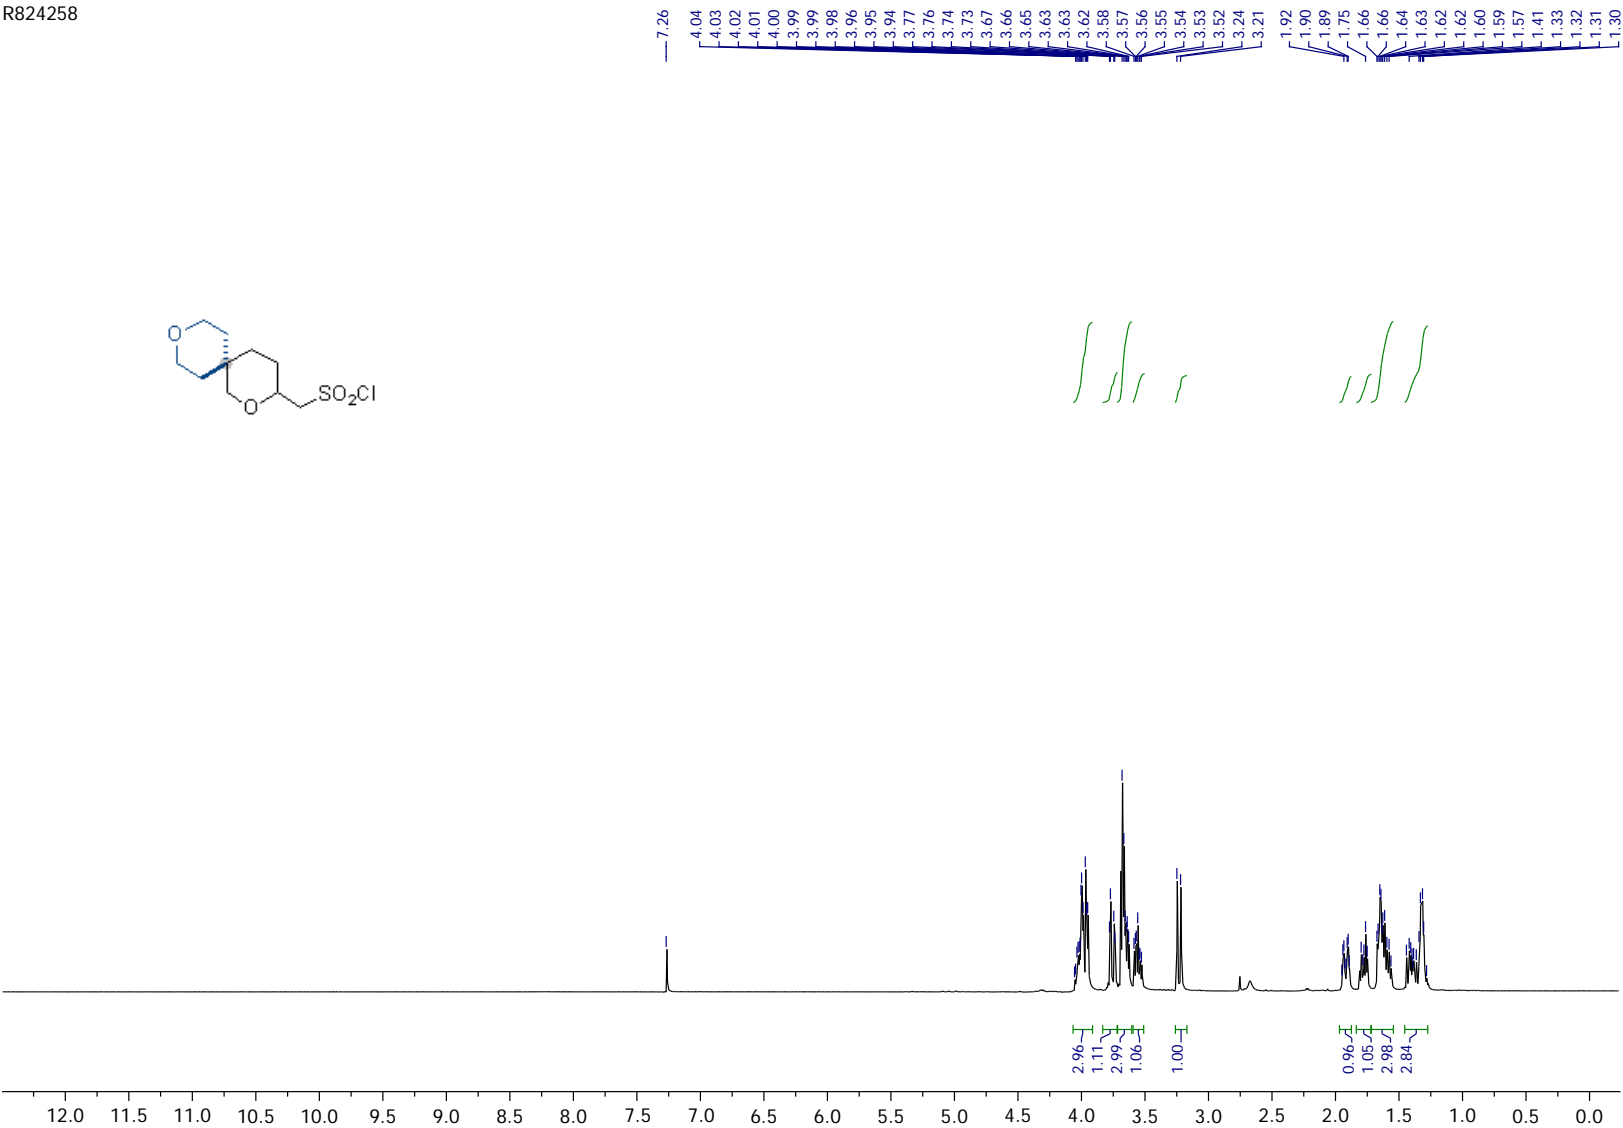

R824258\_13C

|||||

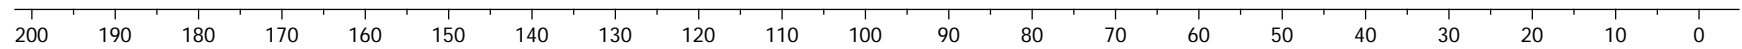

Compound 38e

R1345453

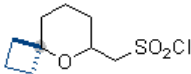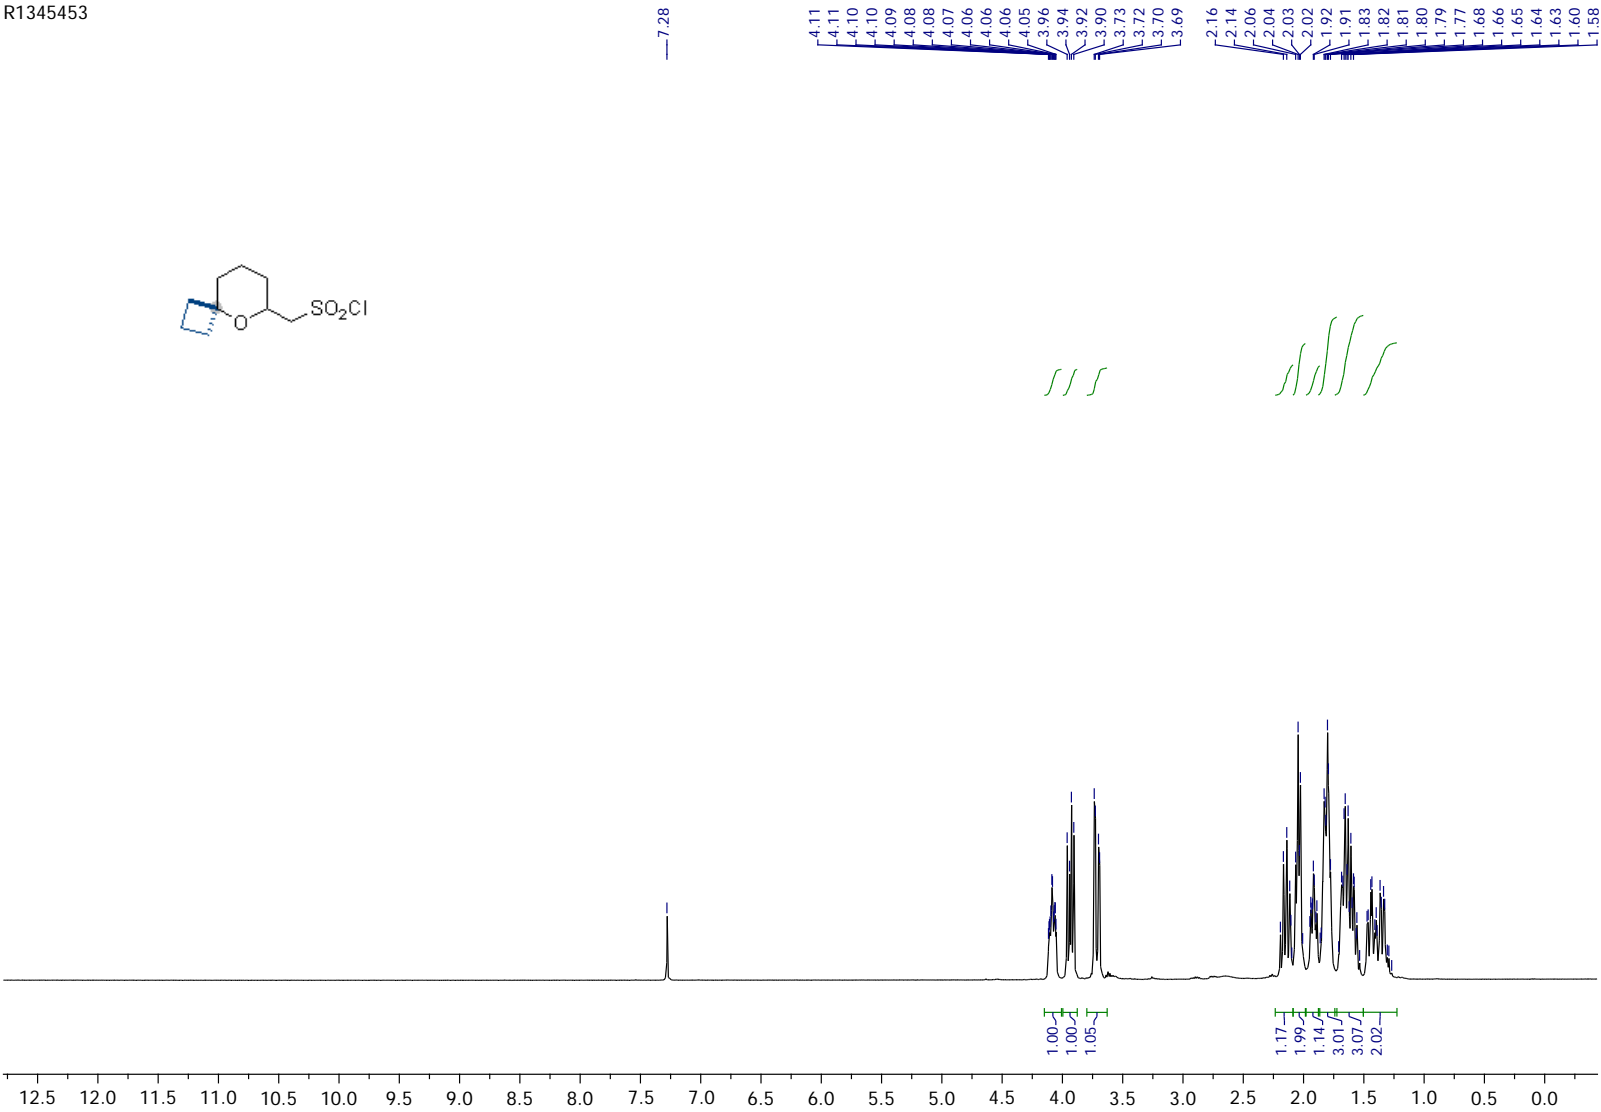

R1345453\_C13

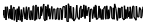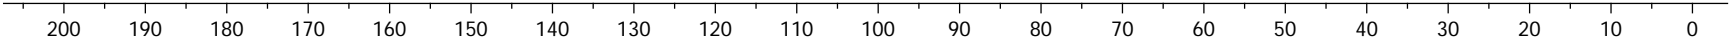

Compound 5f

R1395308

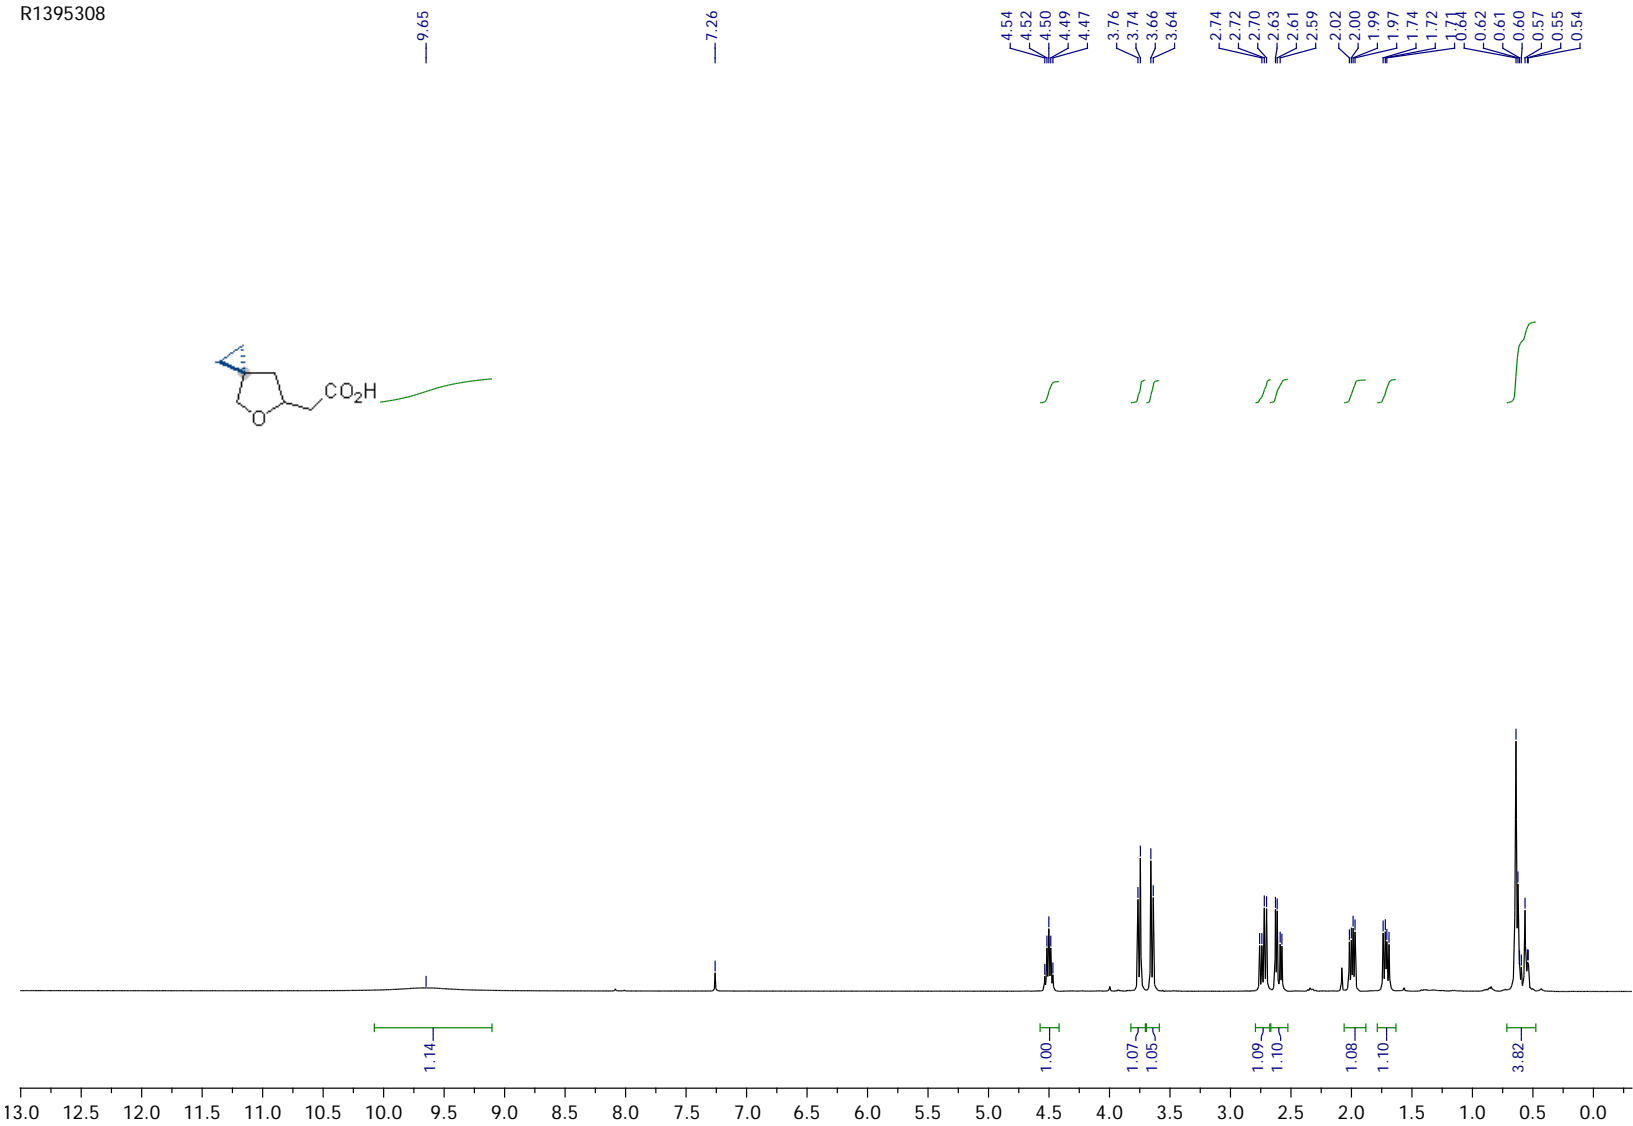

R1395308\_C13

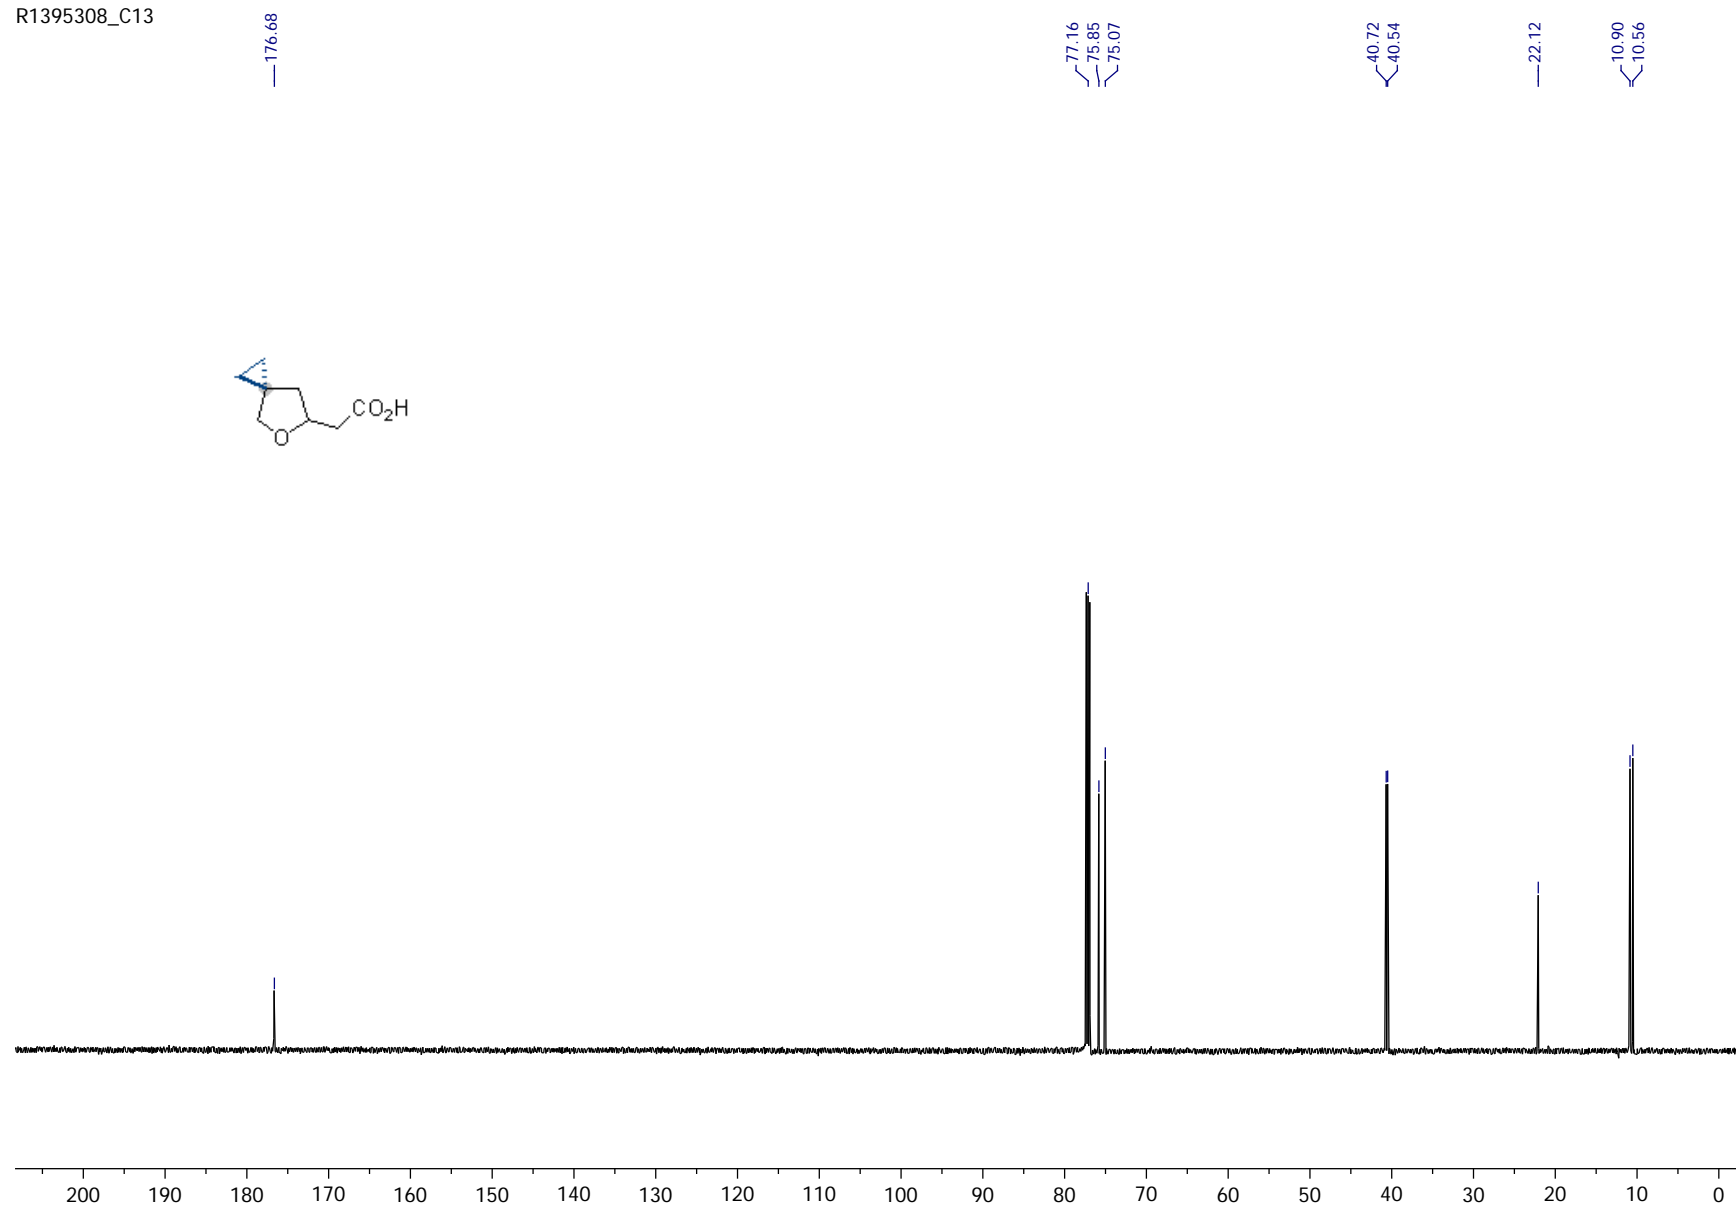



# Compound 6f

R1379783

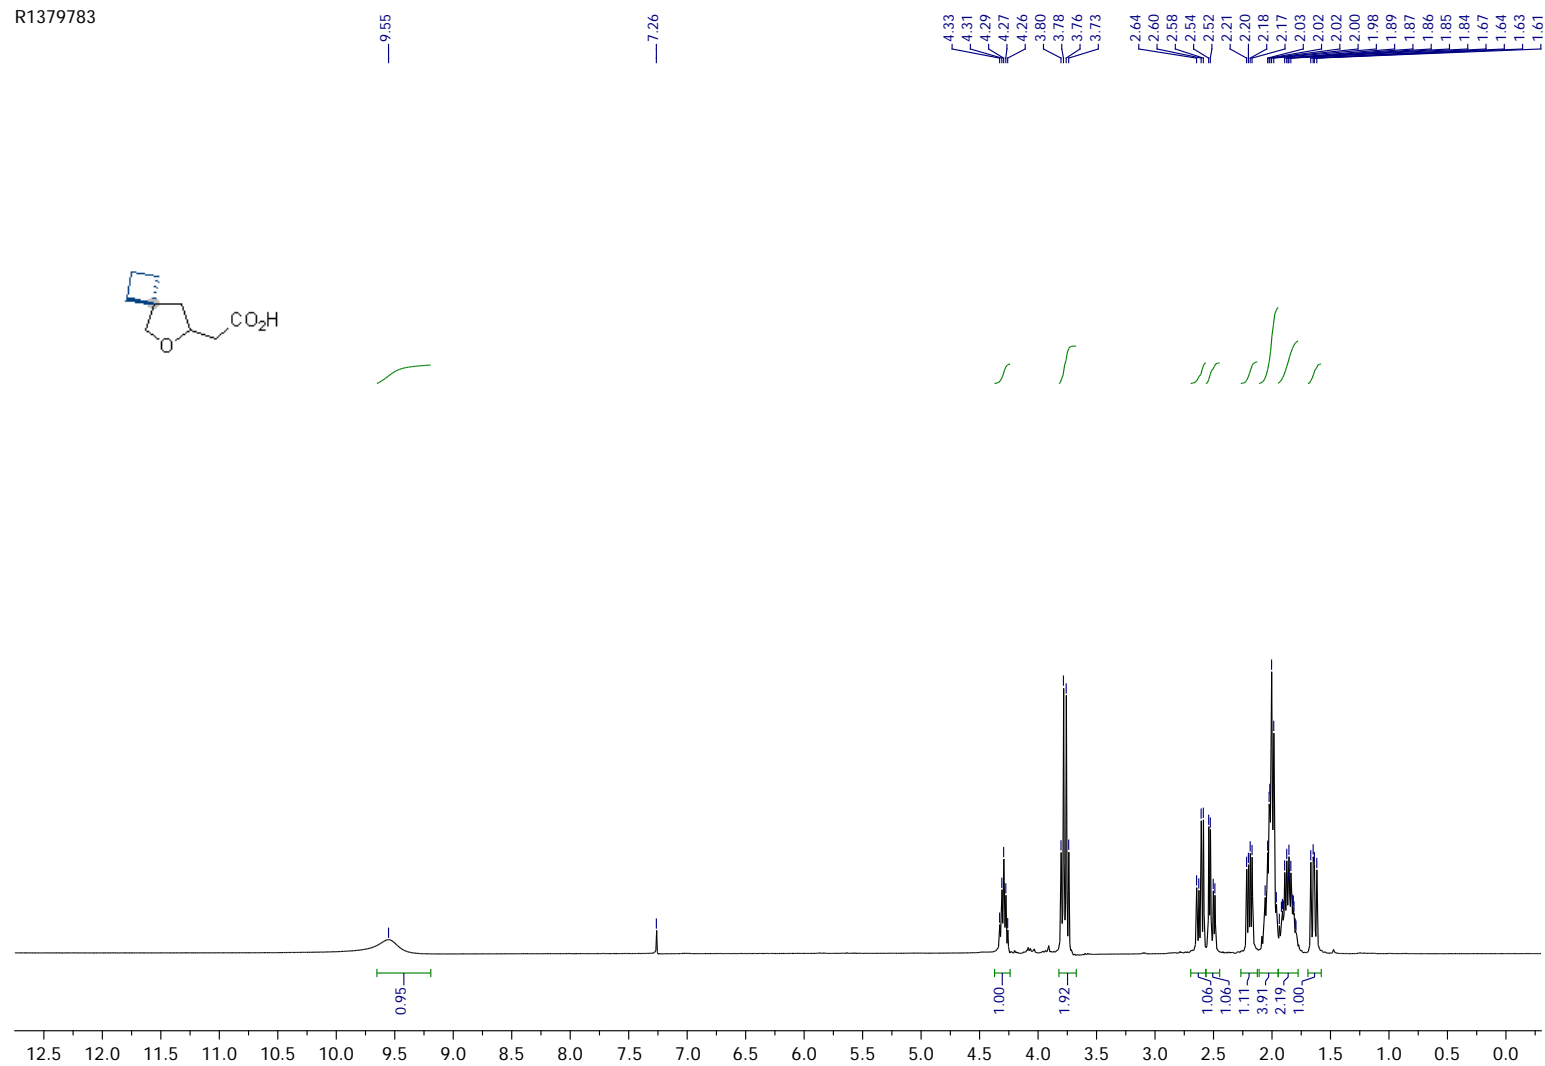

R1379783\_C13

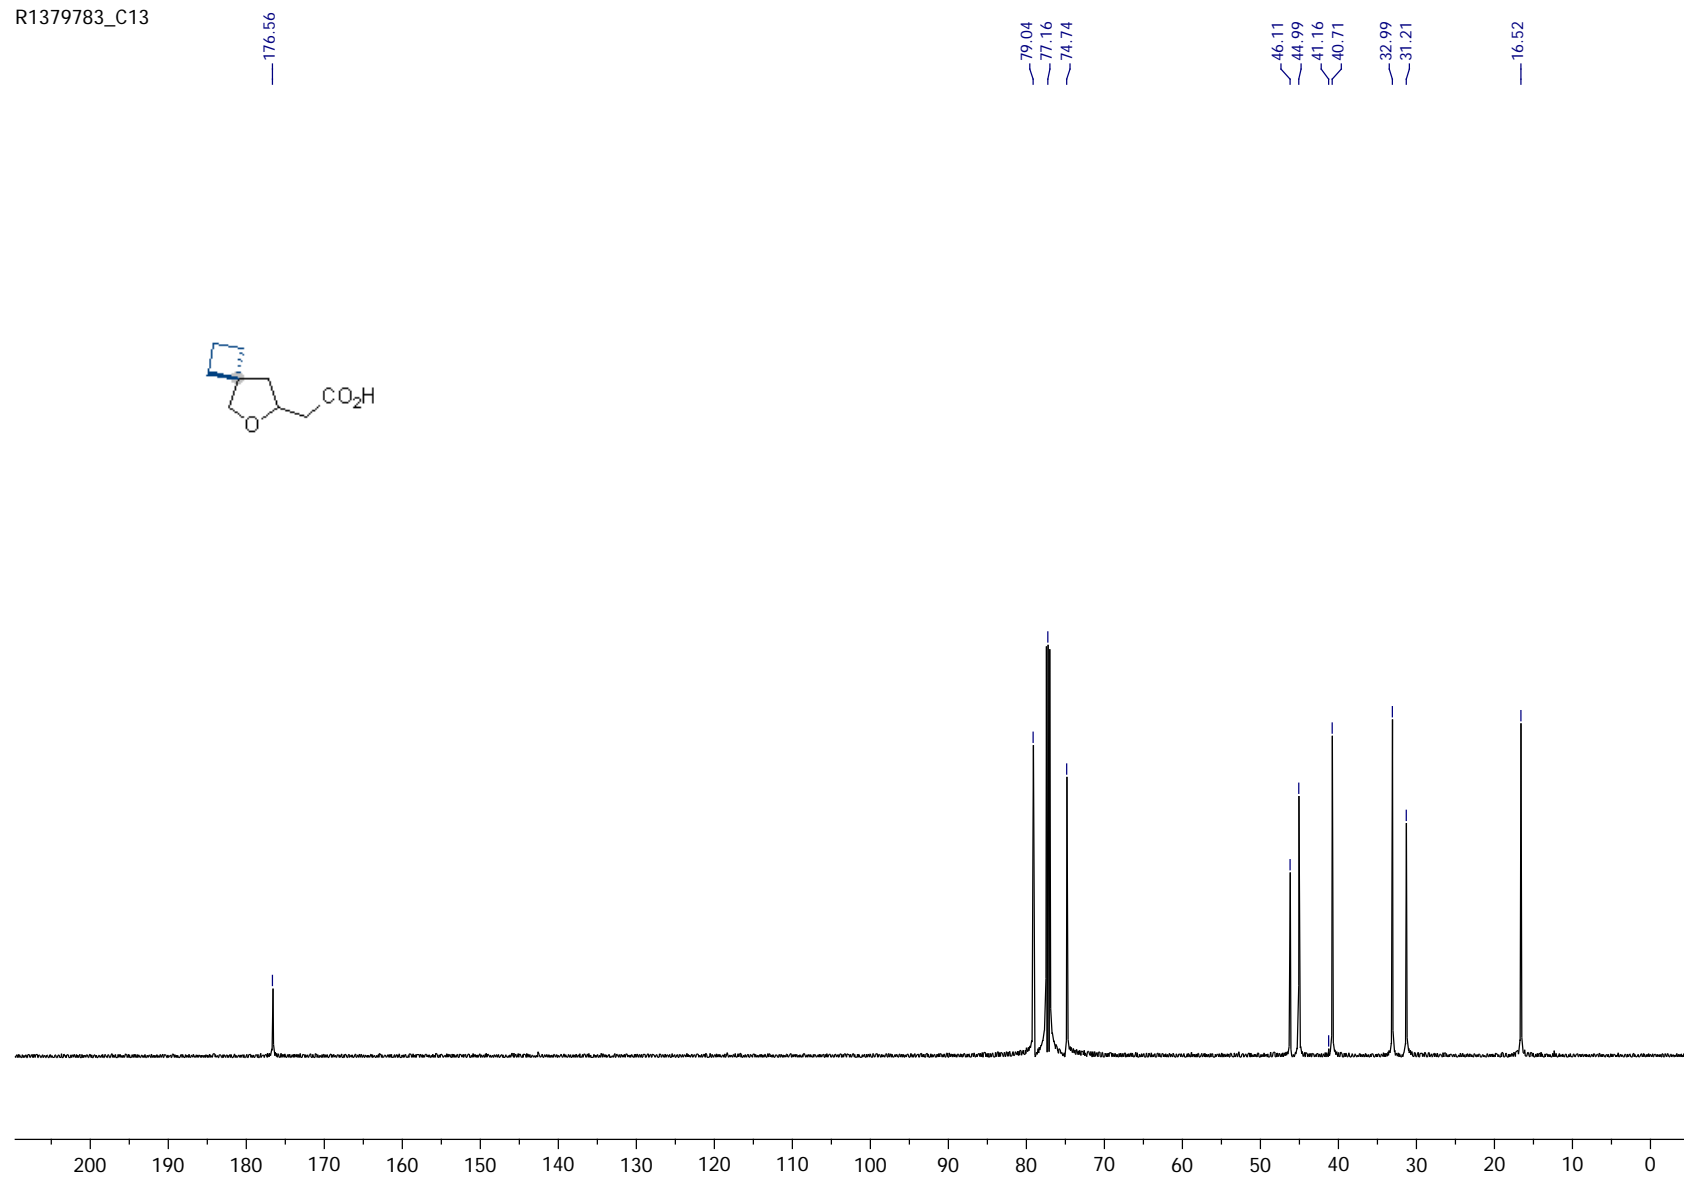

Compound 8f

R1033987

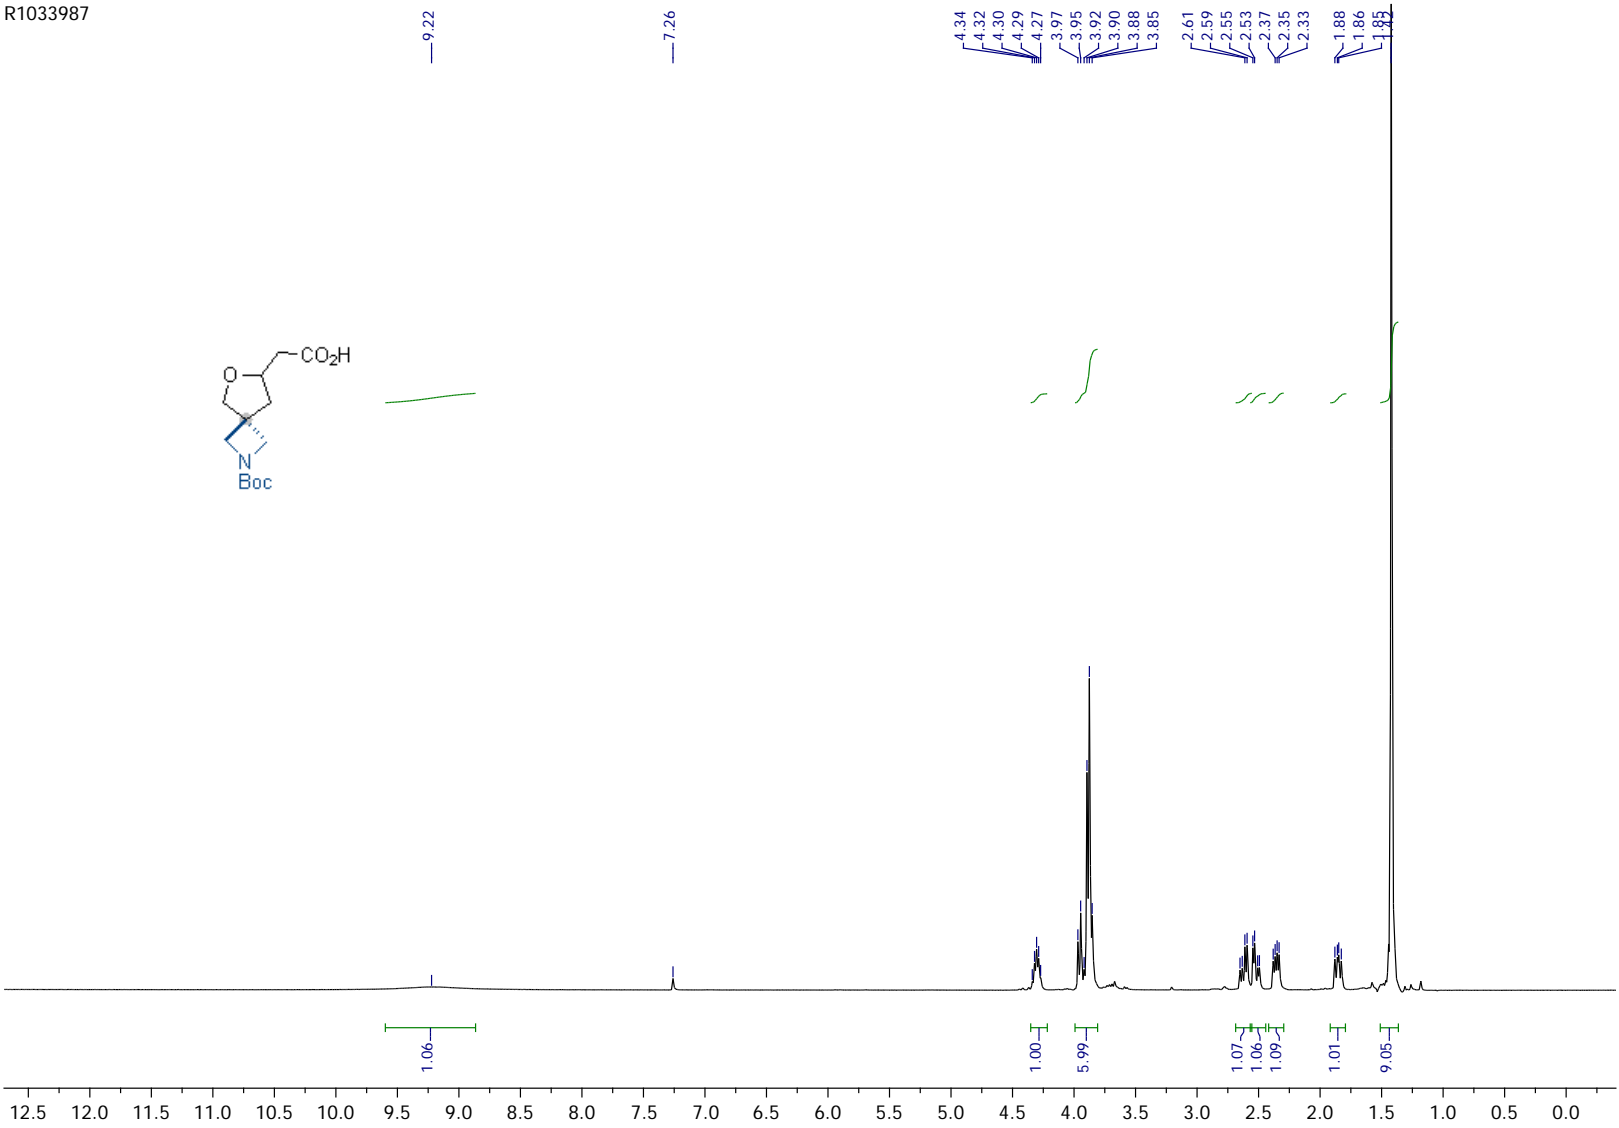

R1033987\_C13

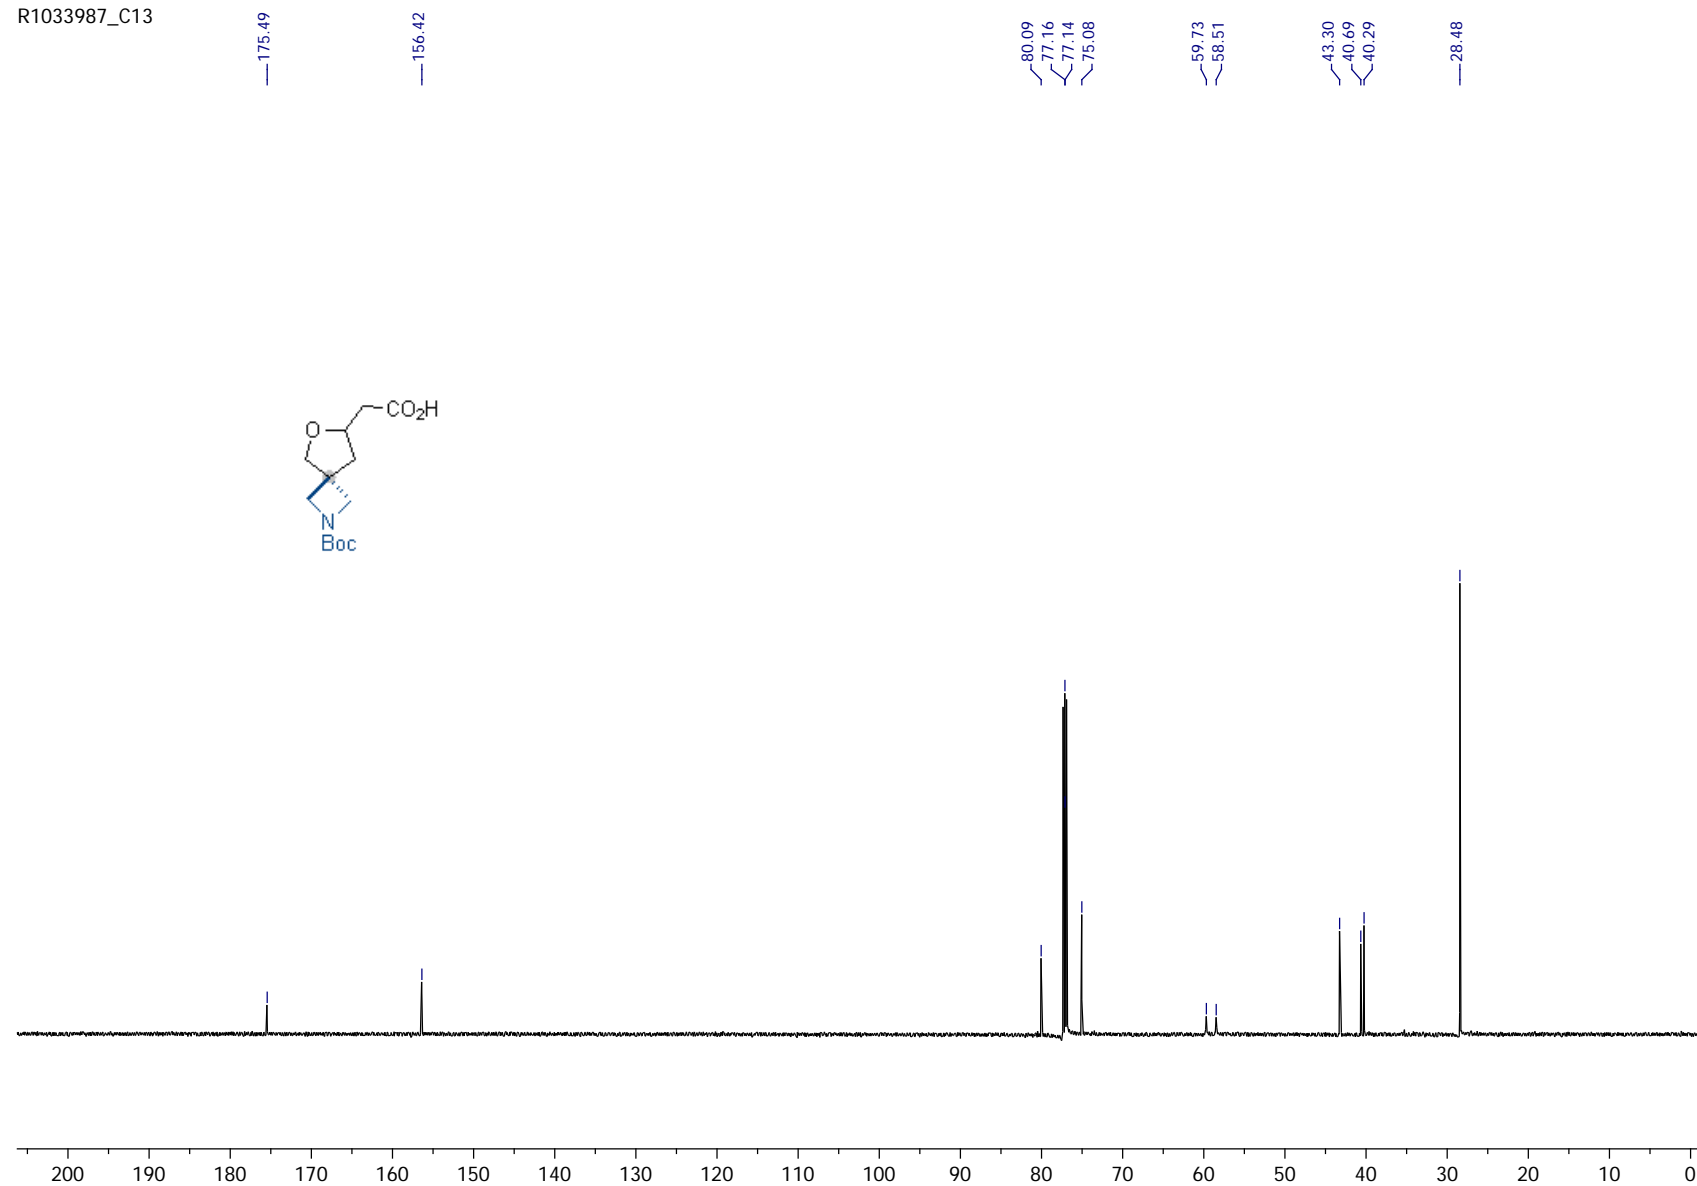

# Compound 9f

R1388247

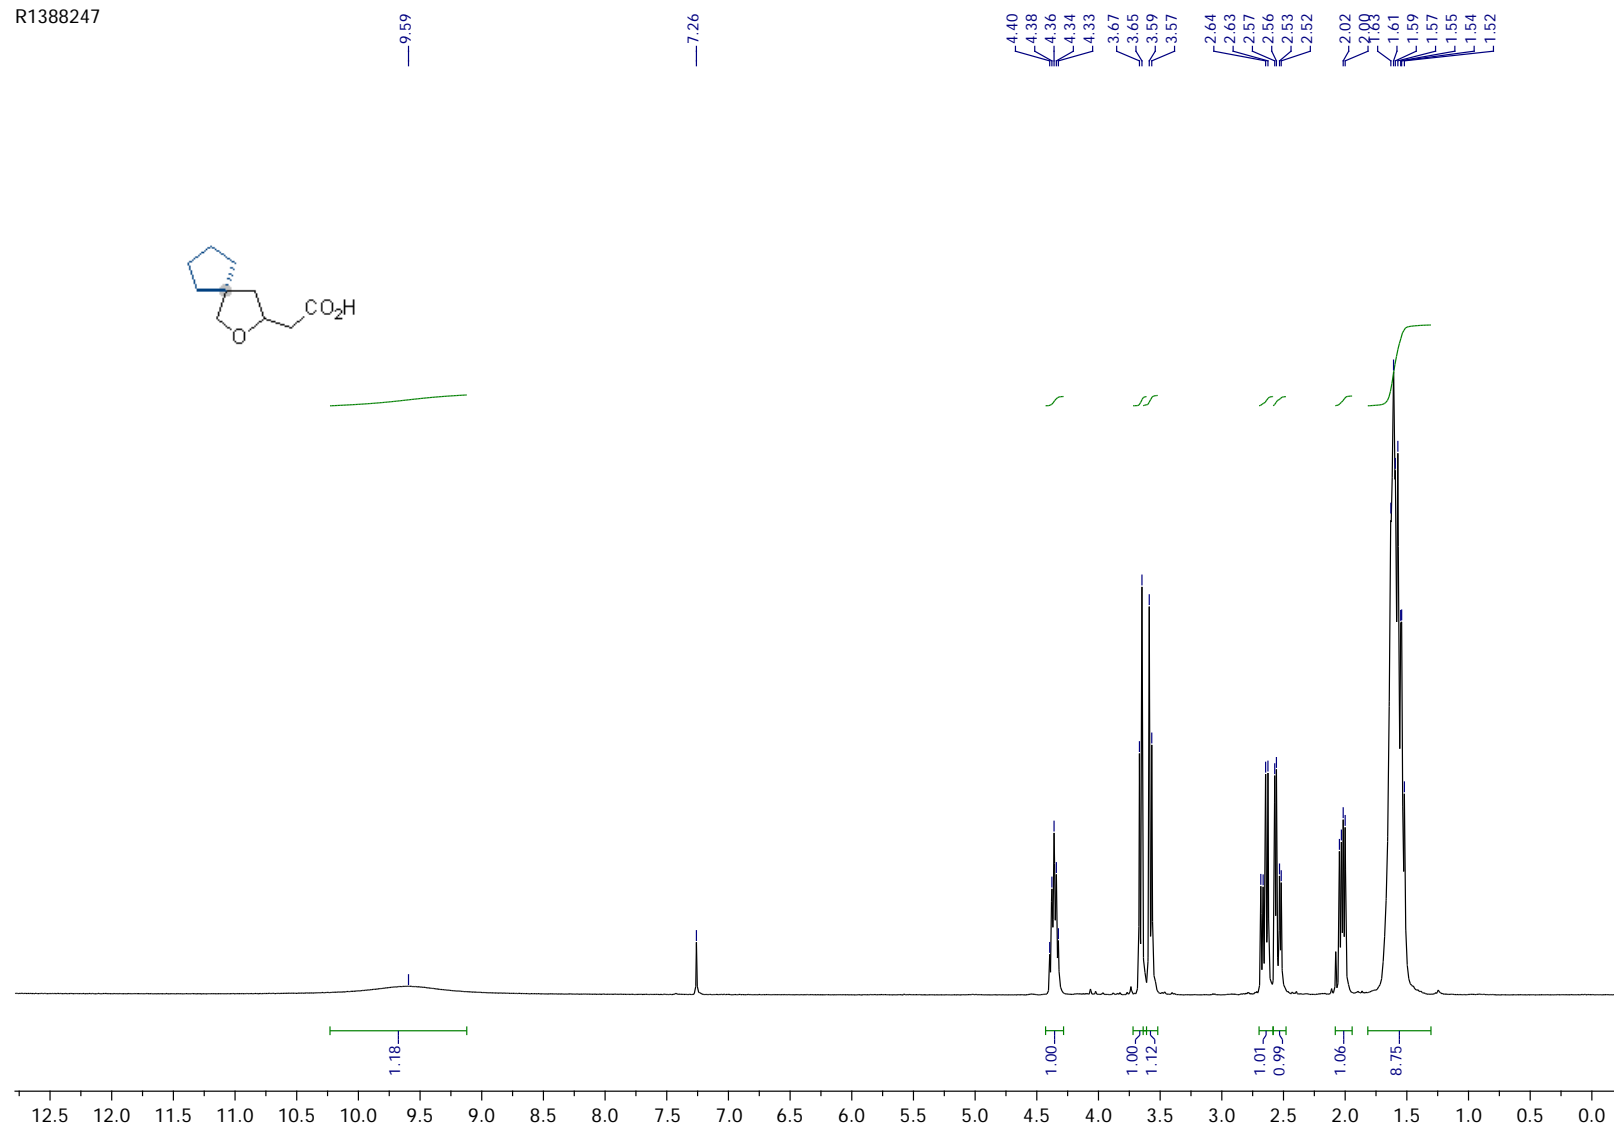

R1388247\_C13

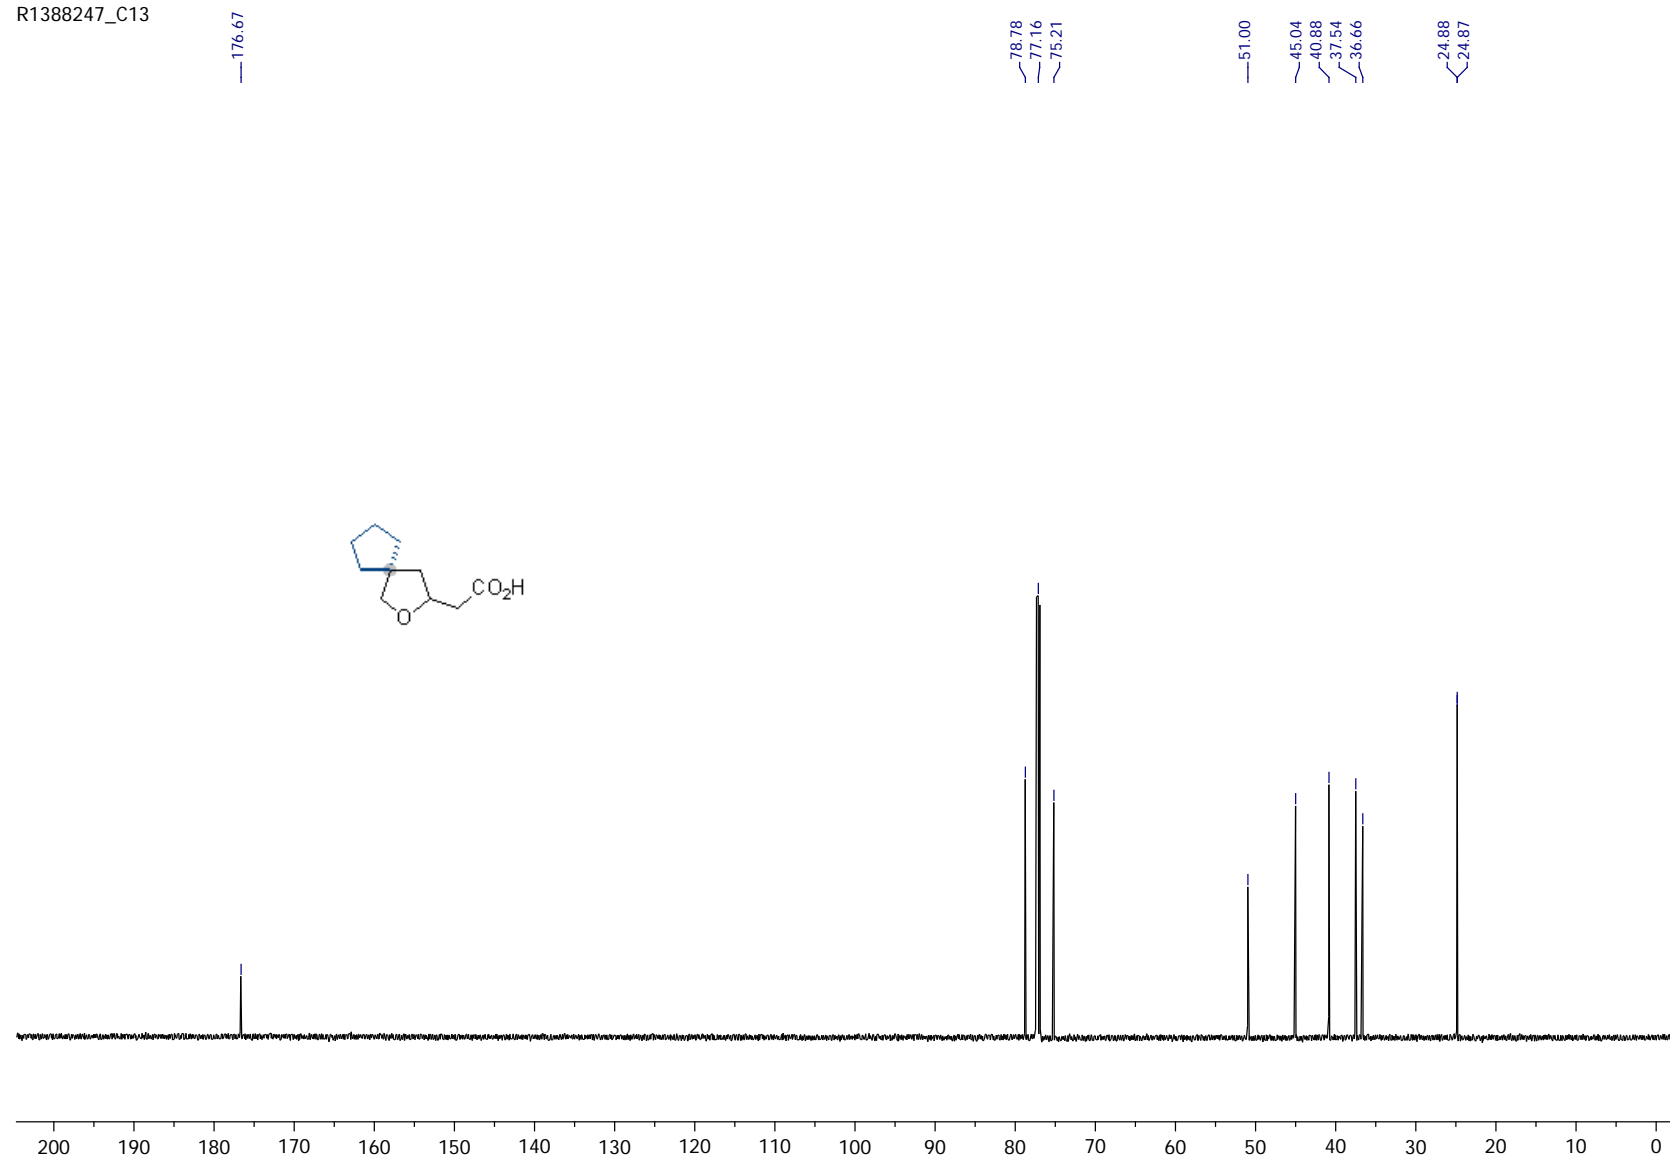

Compound 13f

R1389339

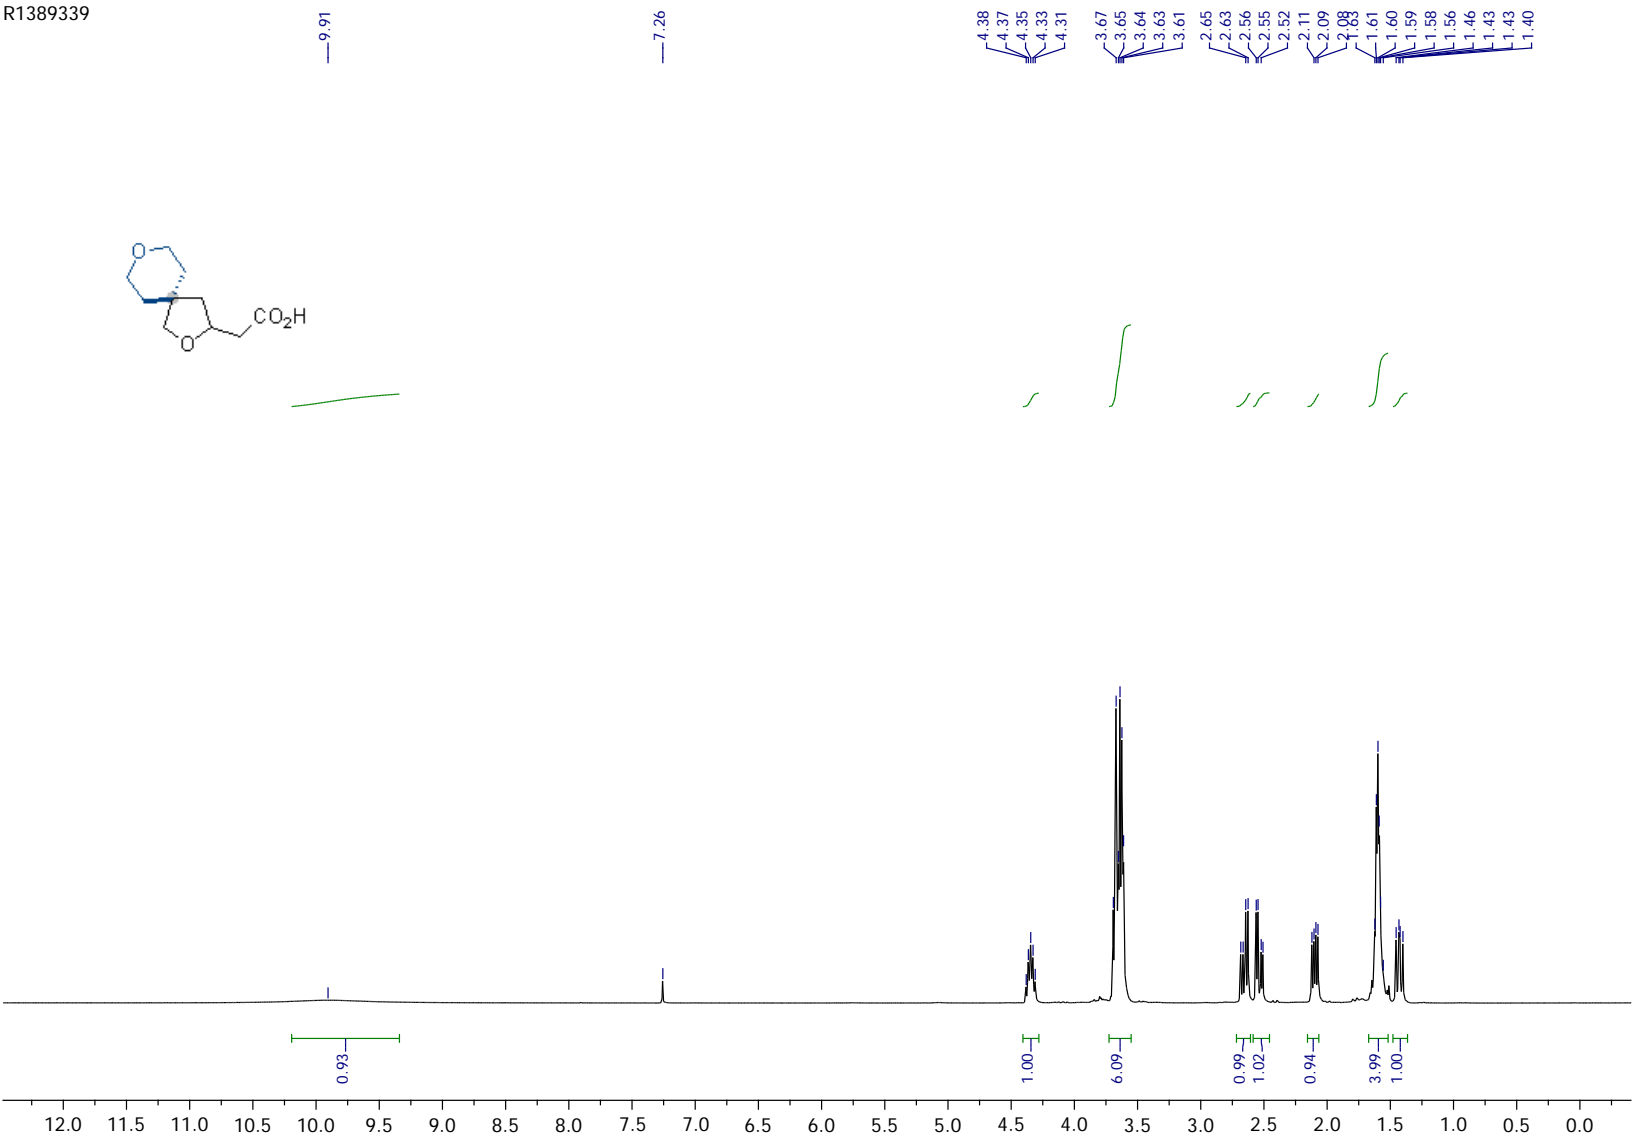

R1389339\_C13

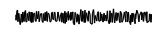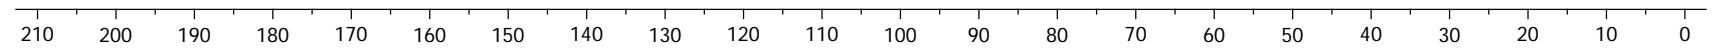



Compound 18f

R838126

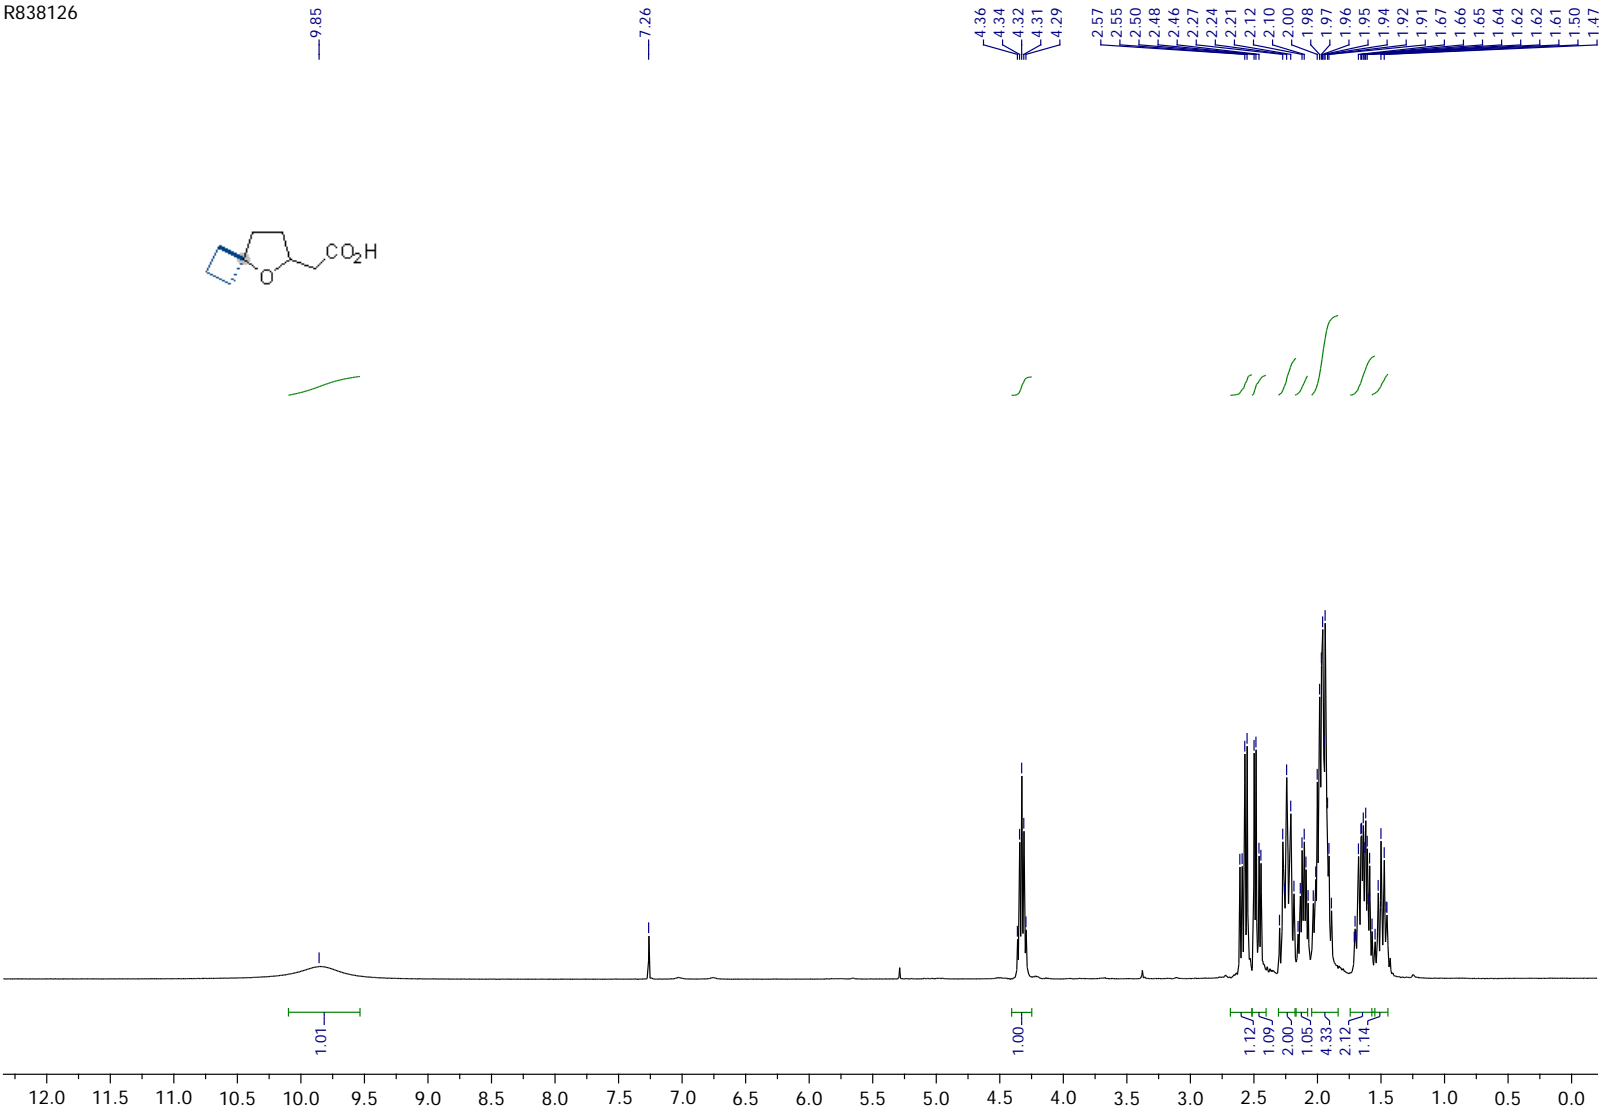

R838126\_C13

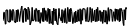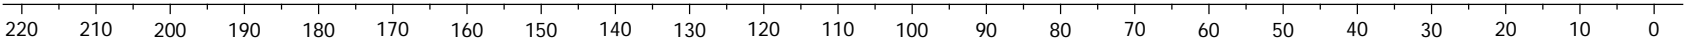

Compound 21f

R1707357

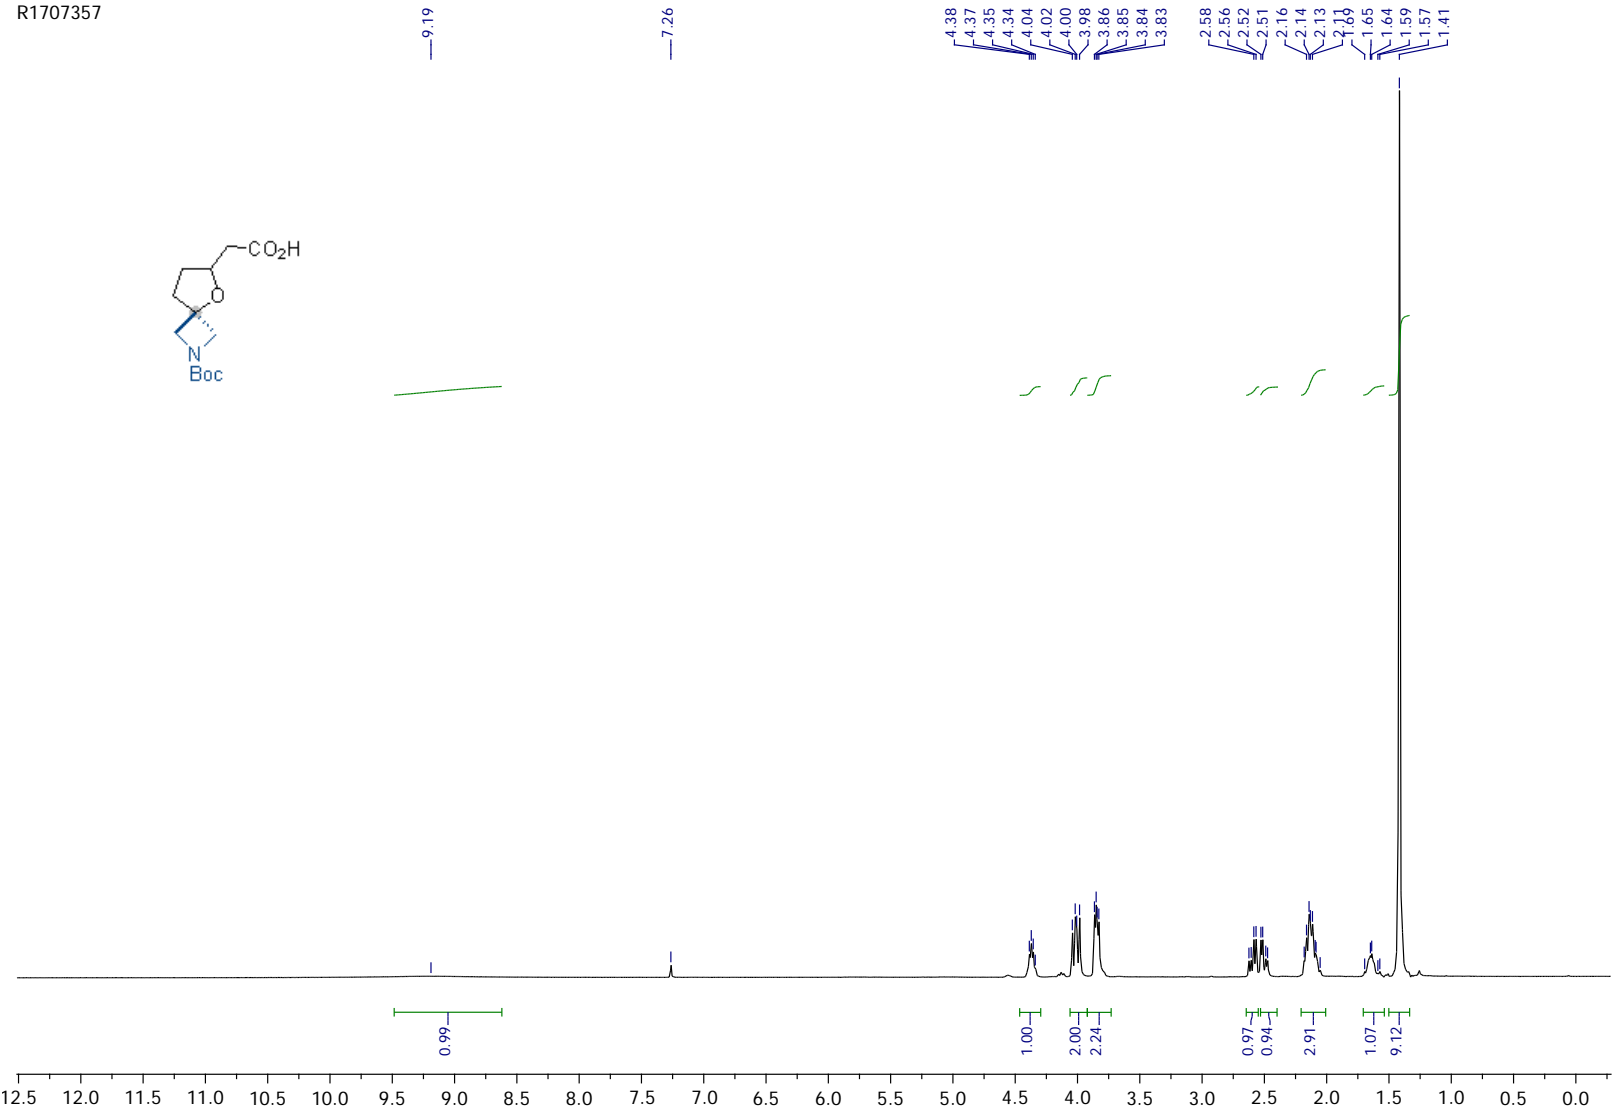

R1707357\_C13

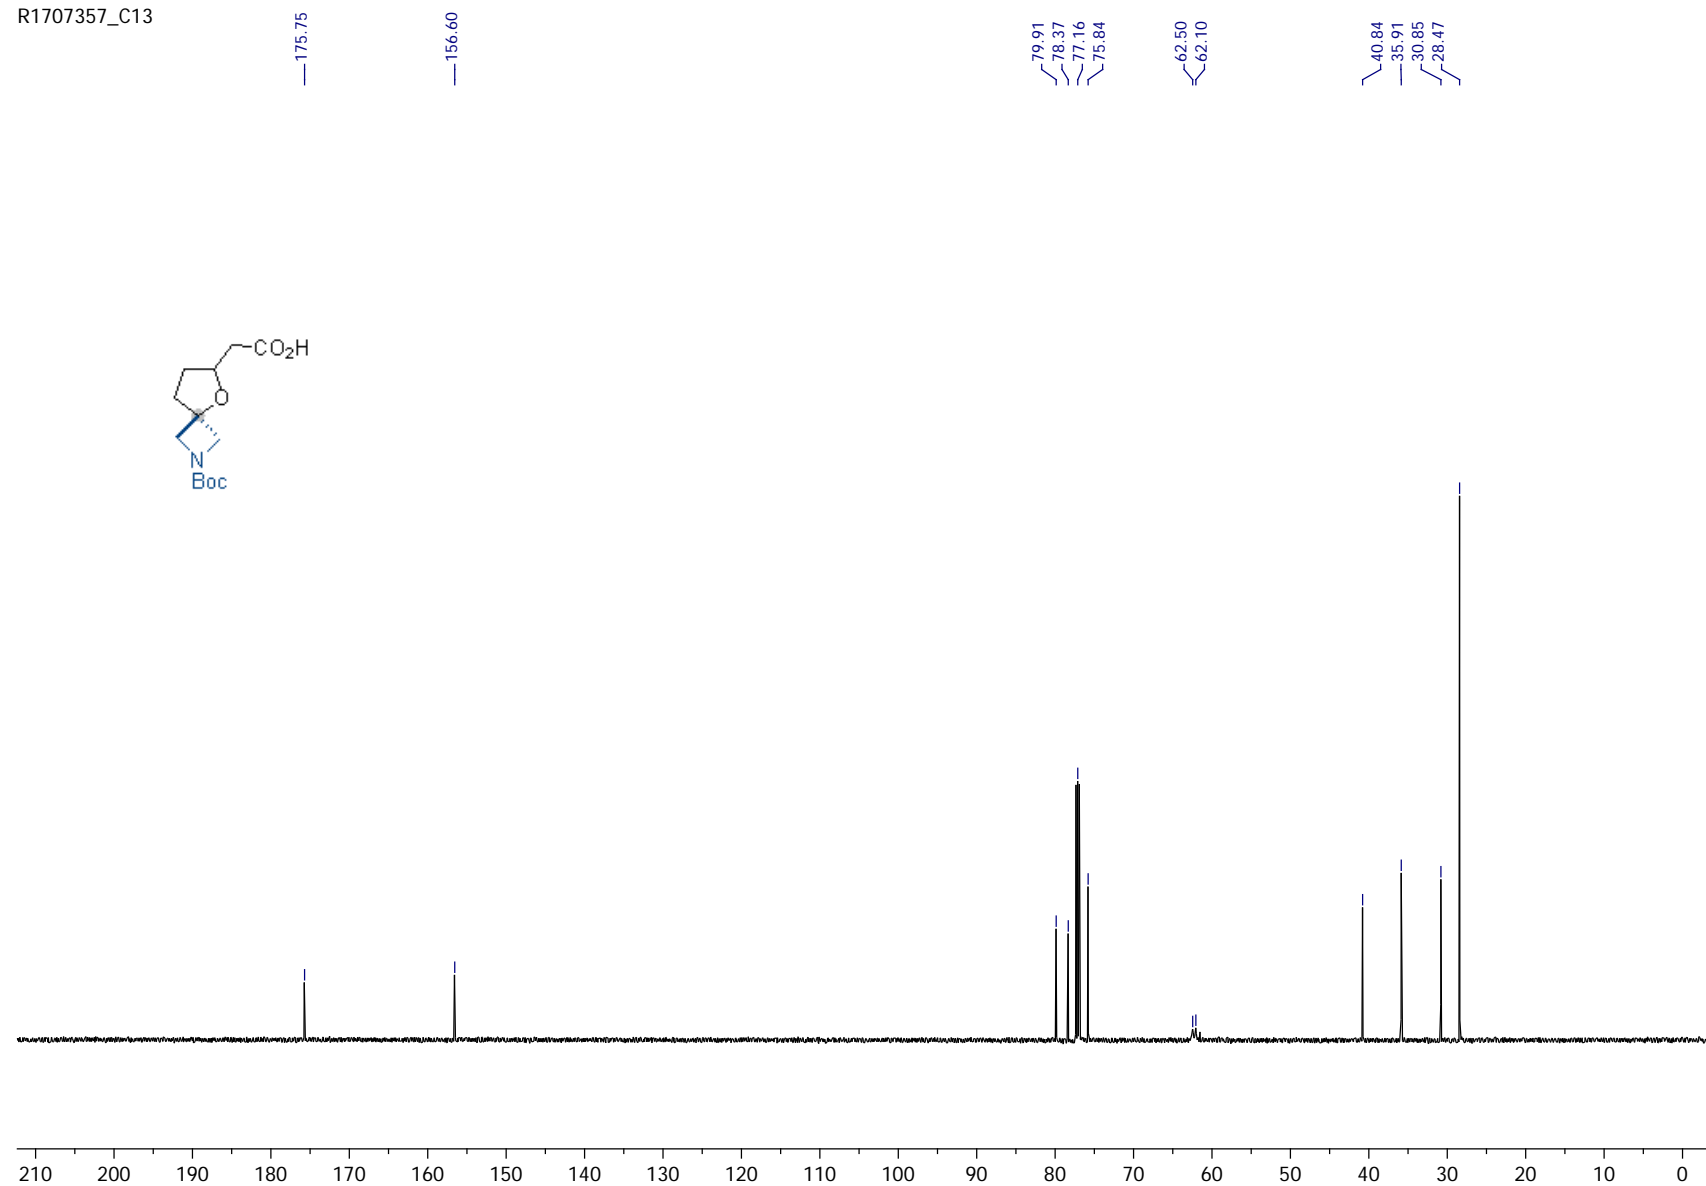

Compound 29f

R1690555

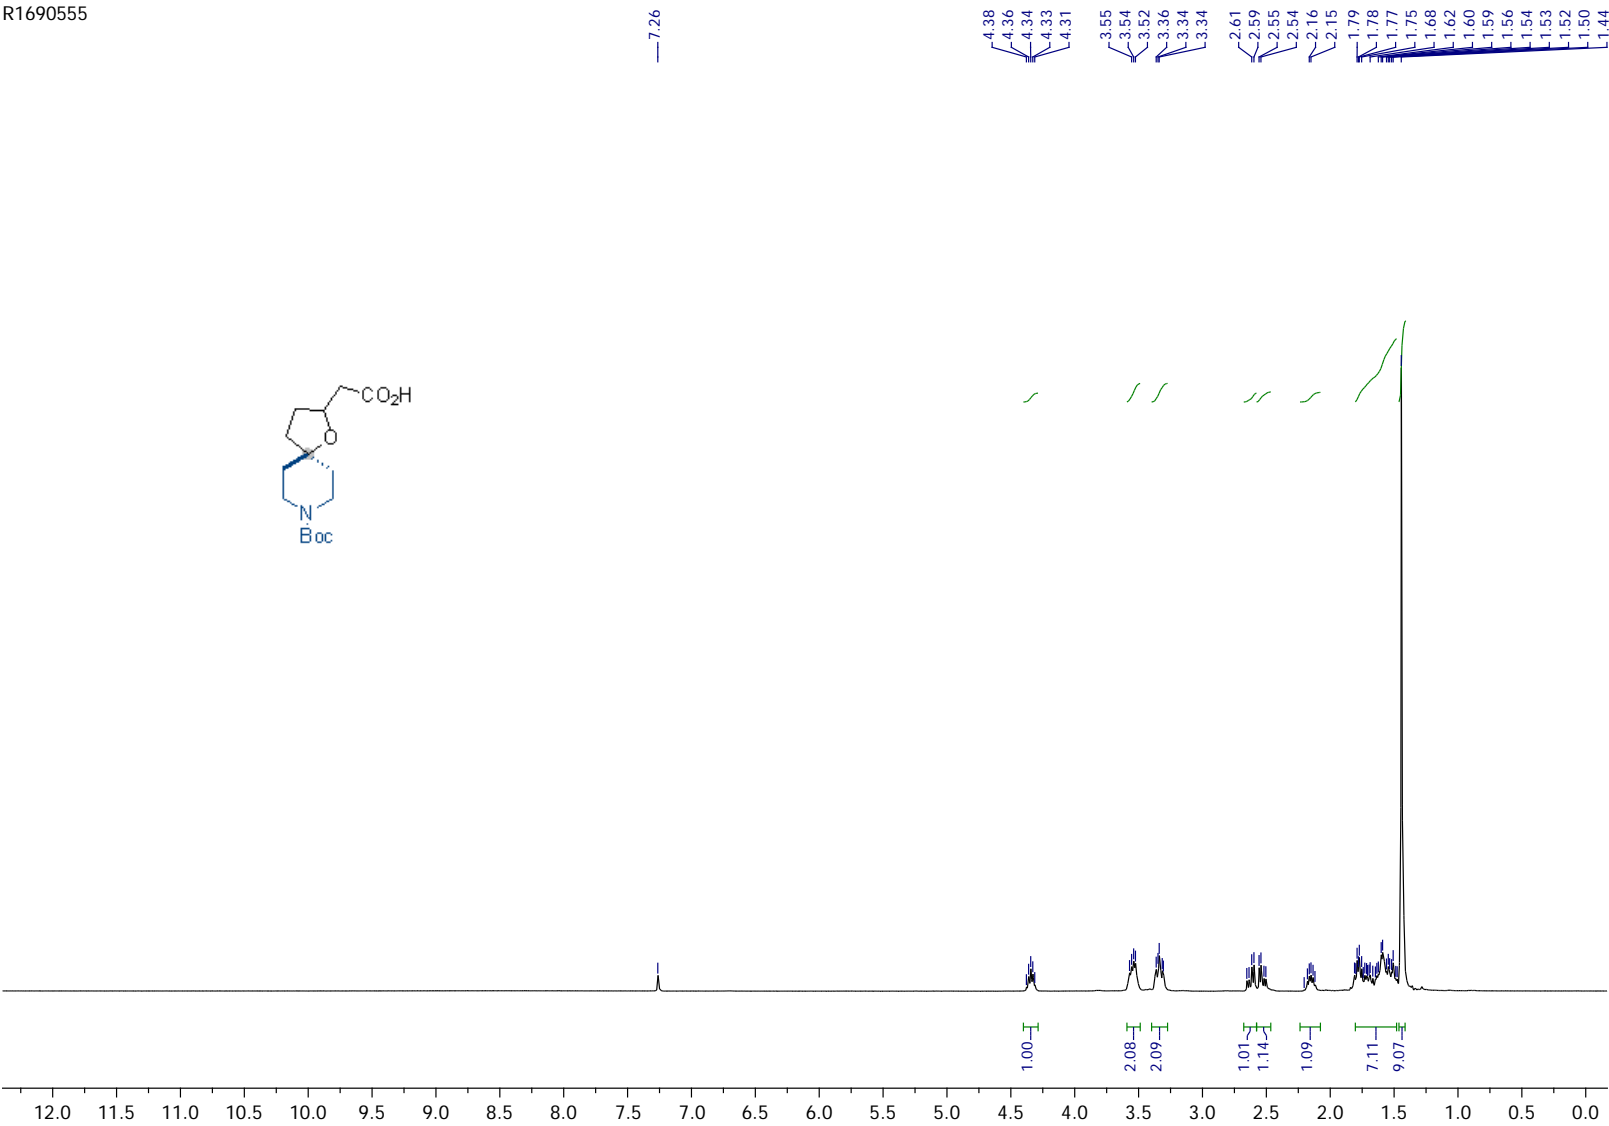

R1690555\_C13

— 155.03

81.18  
79.64  
77.16  
74.43

41.37  
41.28  
41.21  
41.16  
37.78  
36.44  
31.12  
28.58

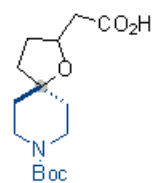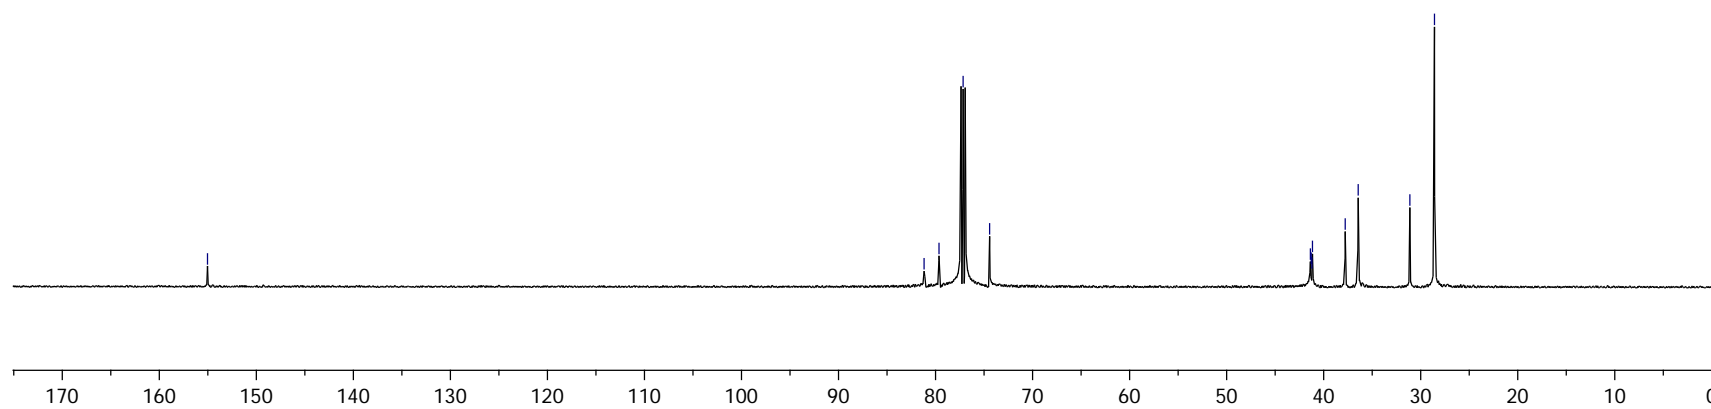

# Compound 34f

R837878

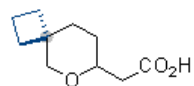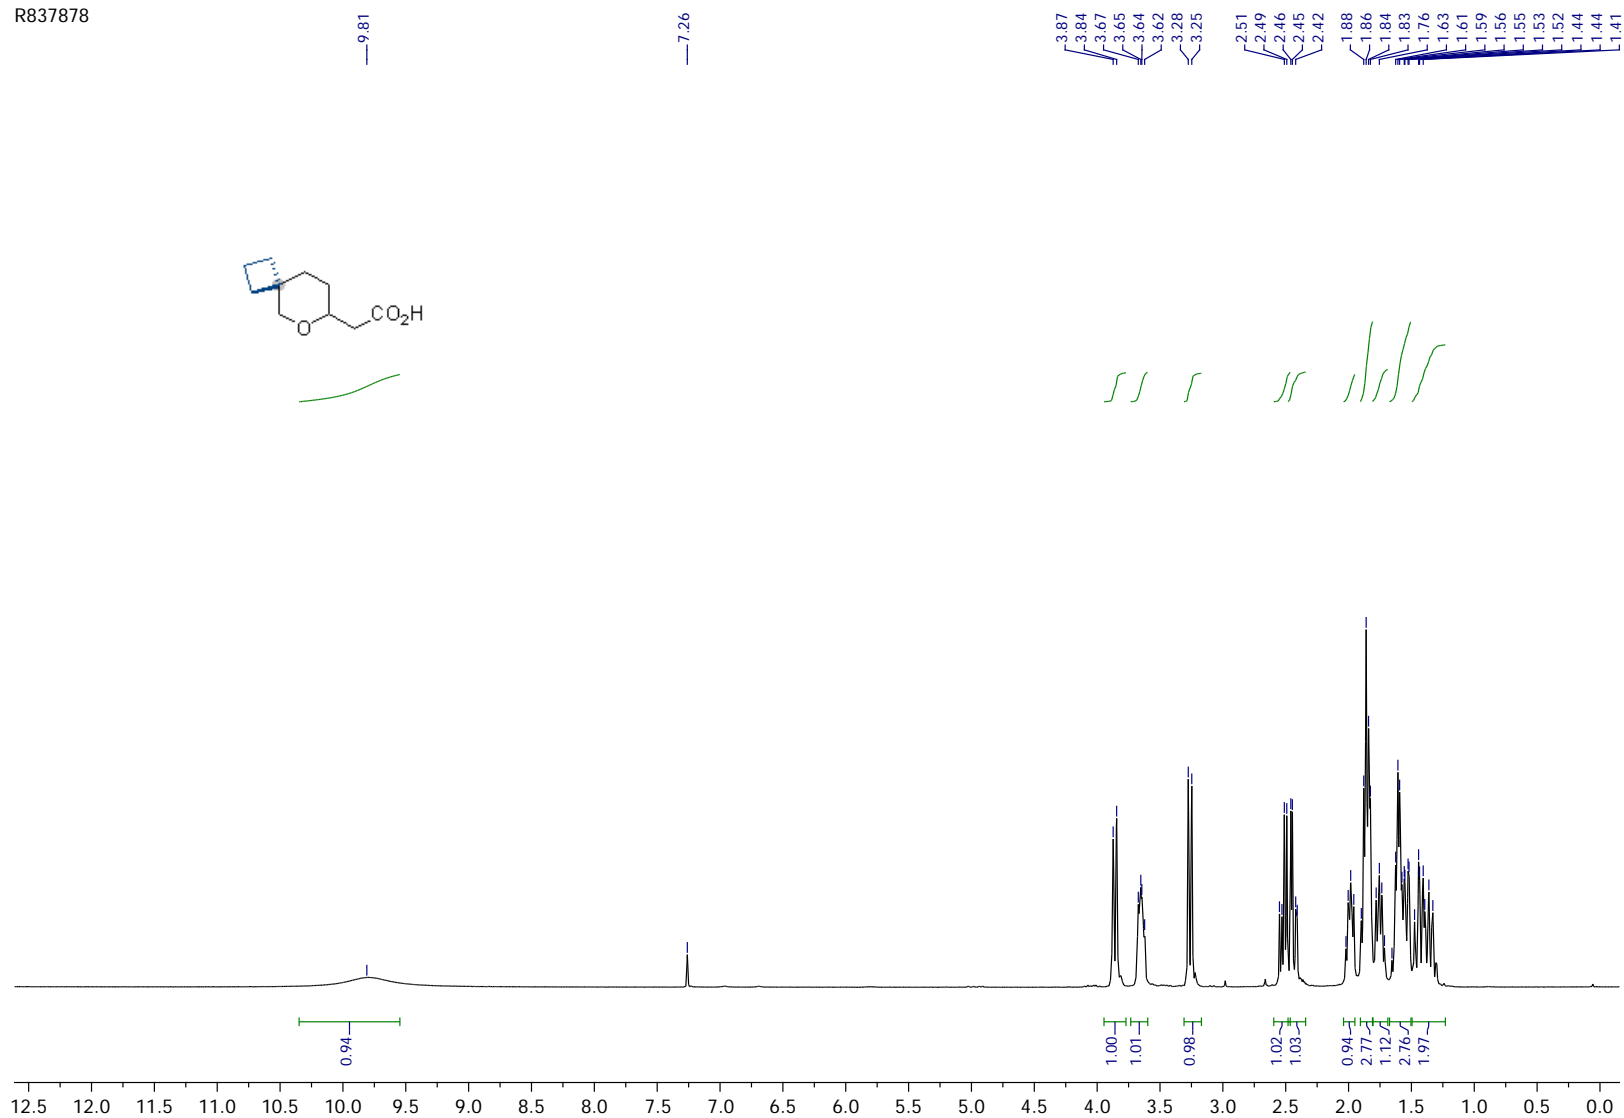

R837878\_C13

|||||

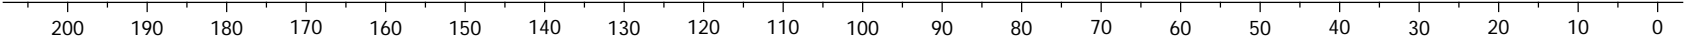



Compound 35f

R1744981

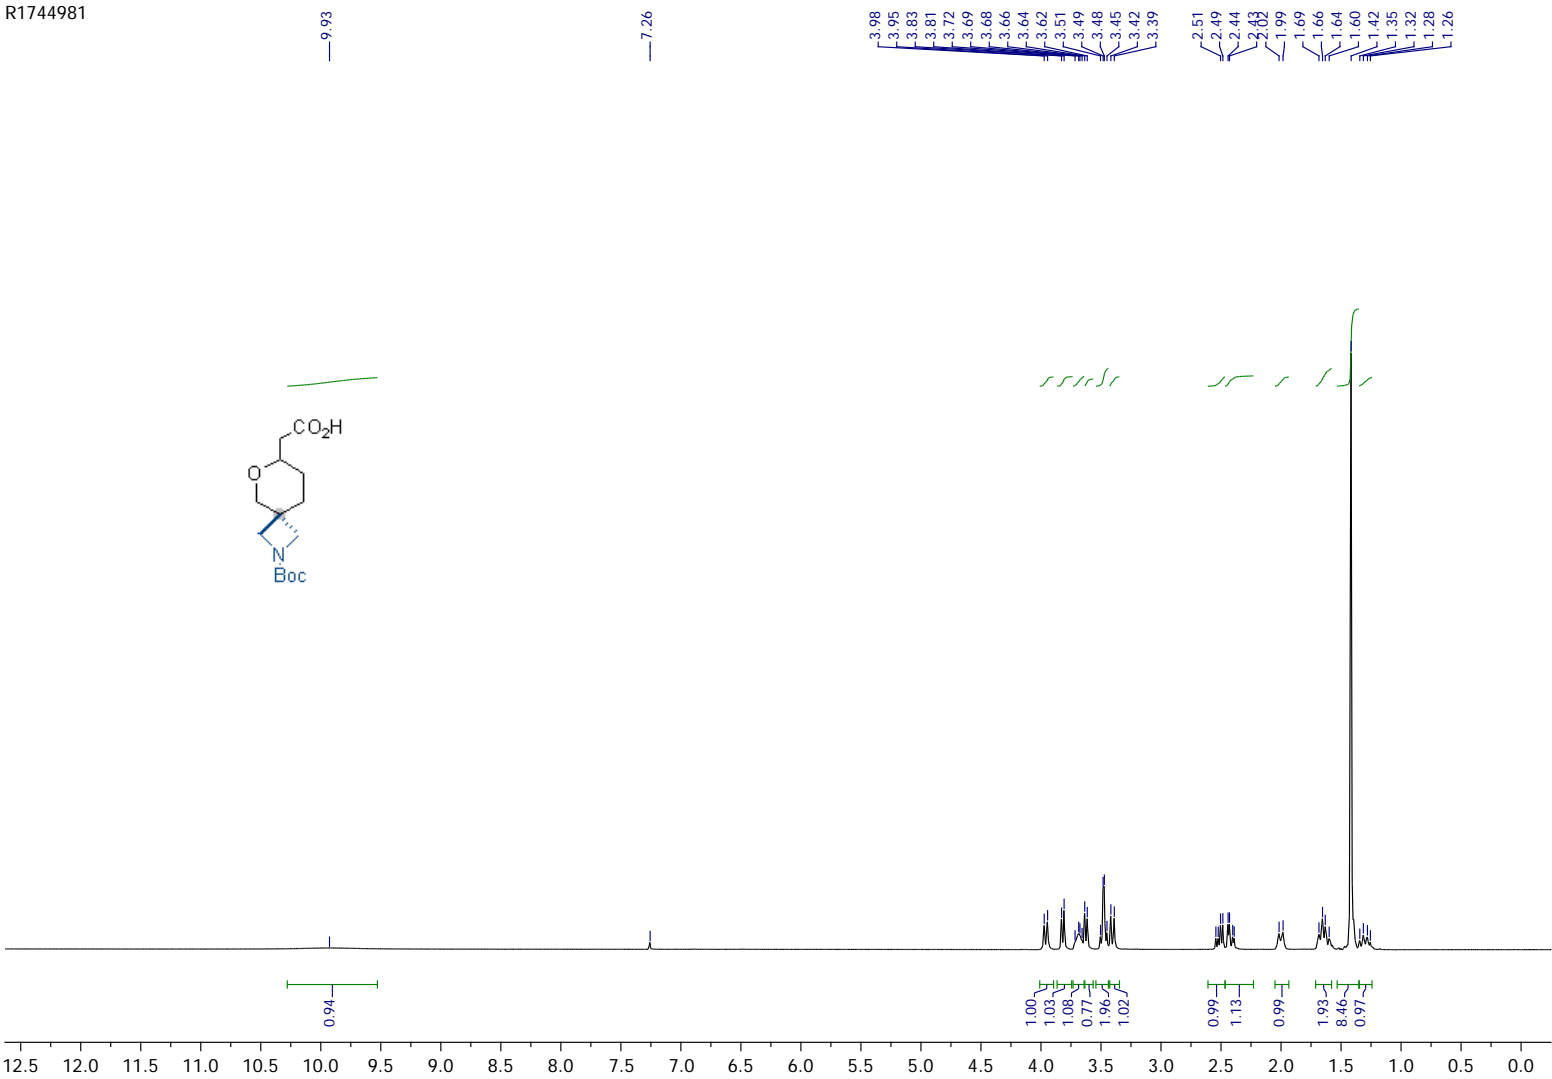

R1744981\_C13

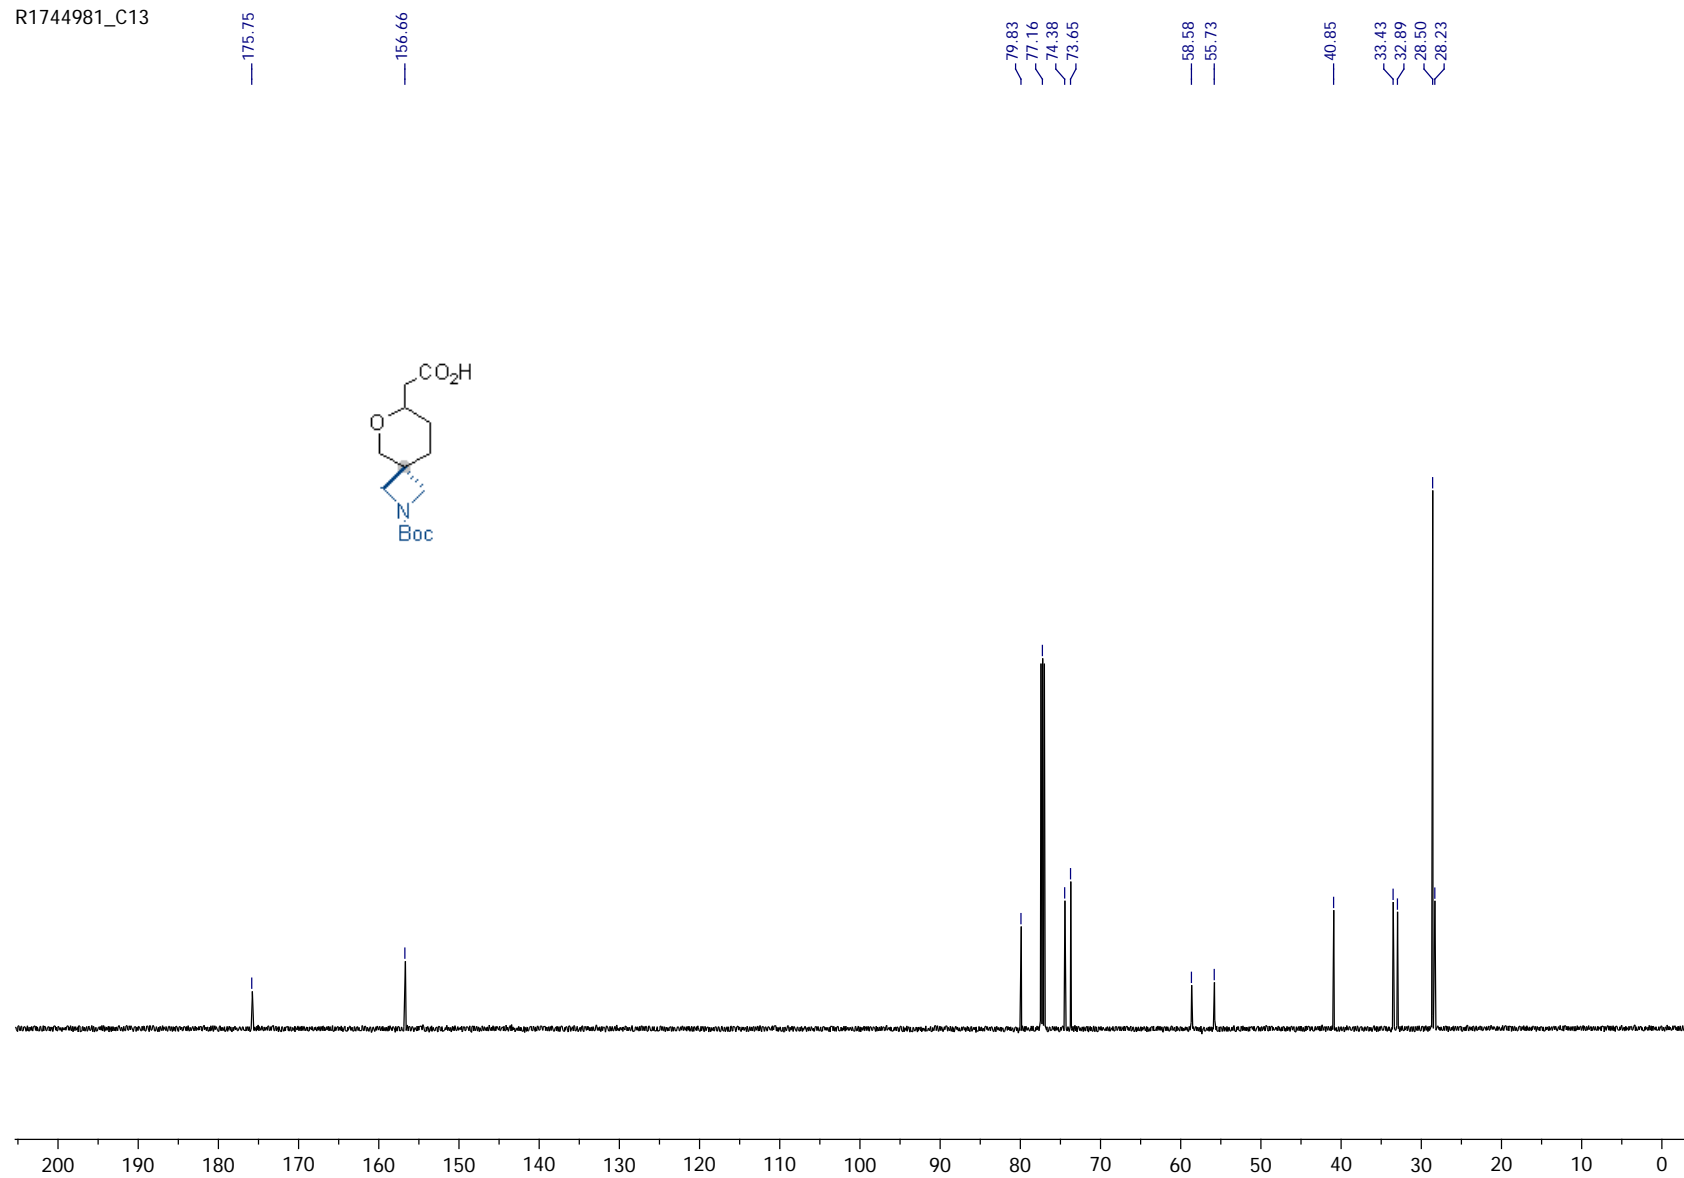

# Compound 36f

R837607

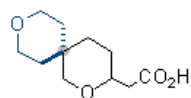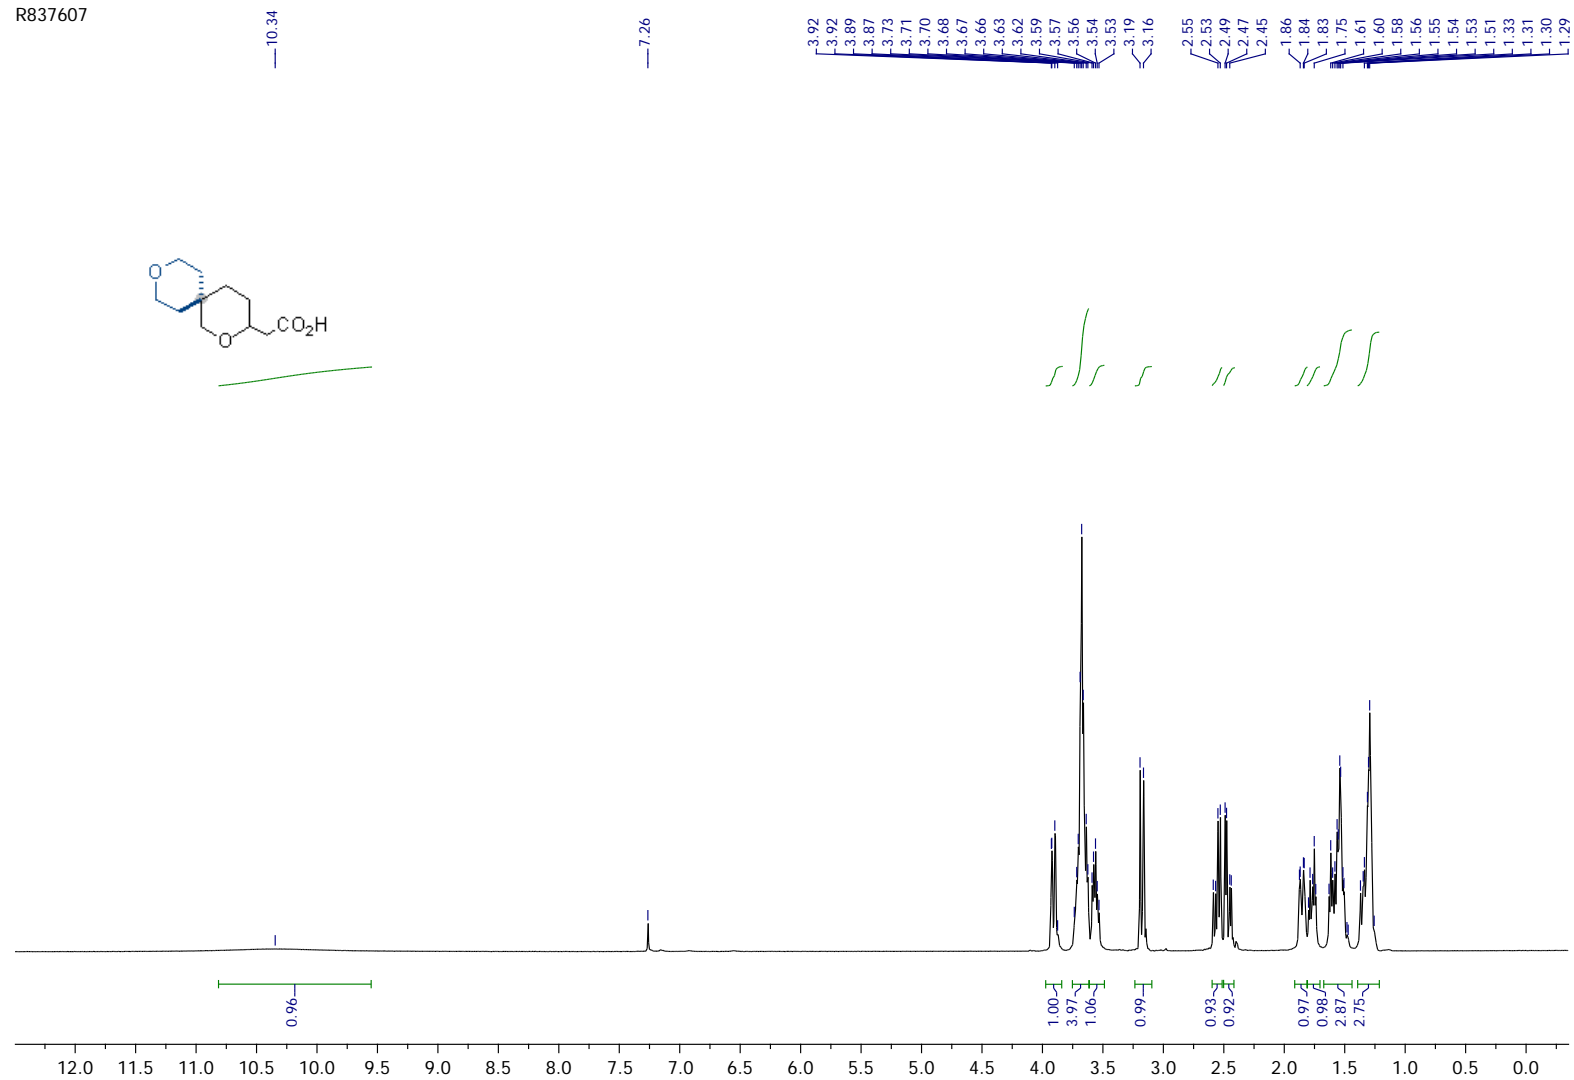

R837607\_C13

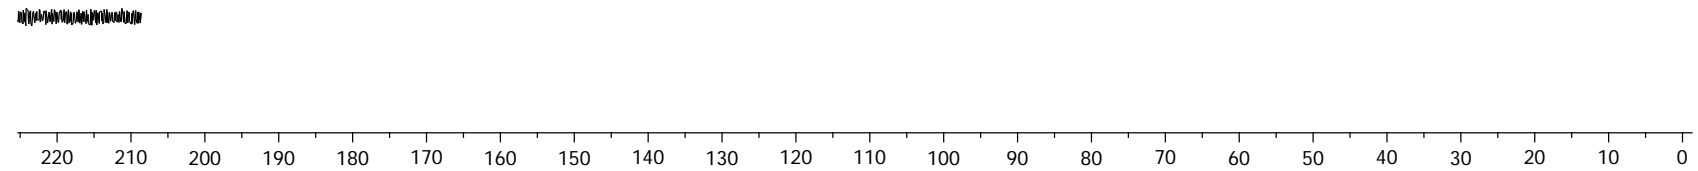

# Compound 38f

R1168510

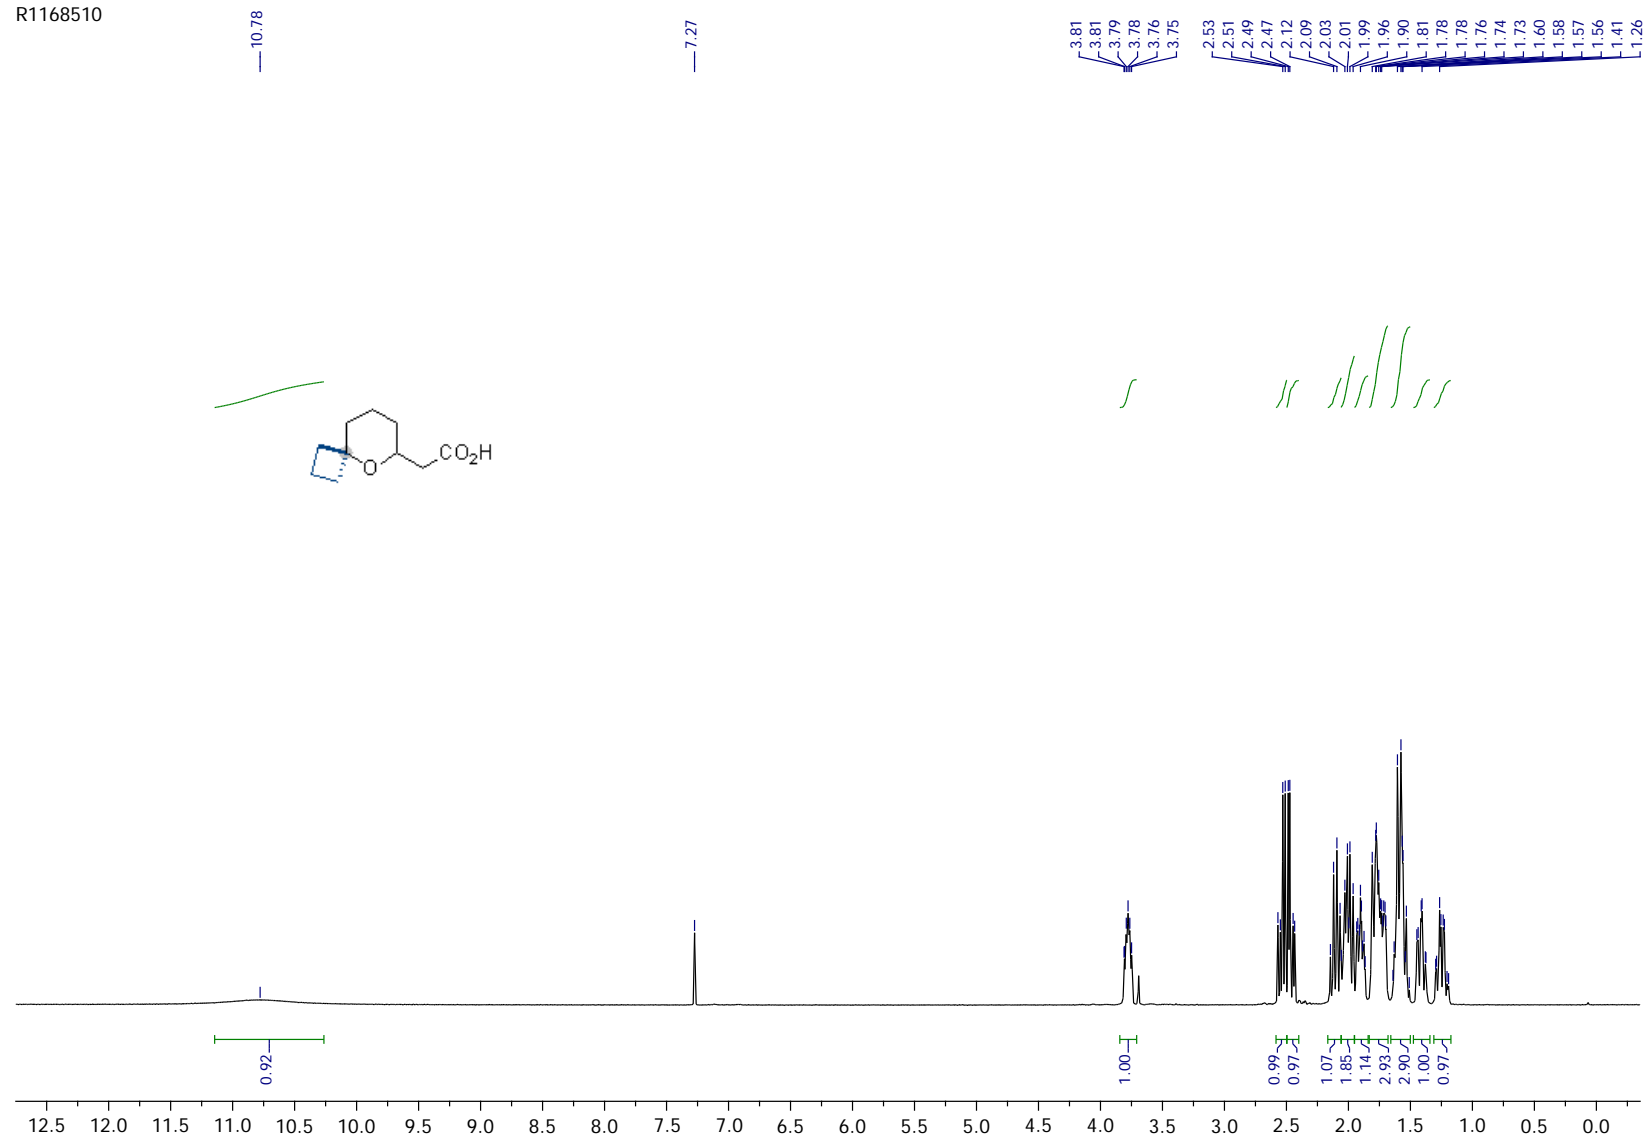

R1168510\_C13

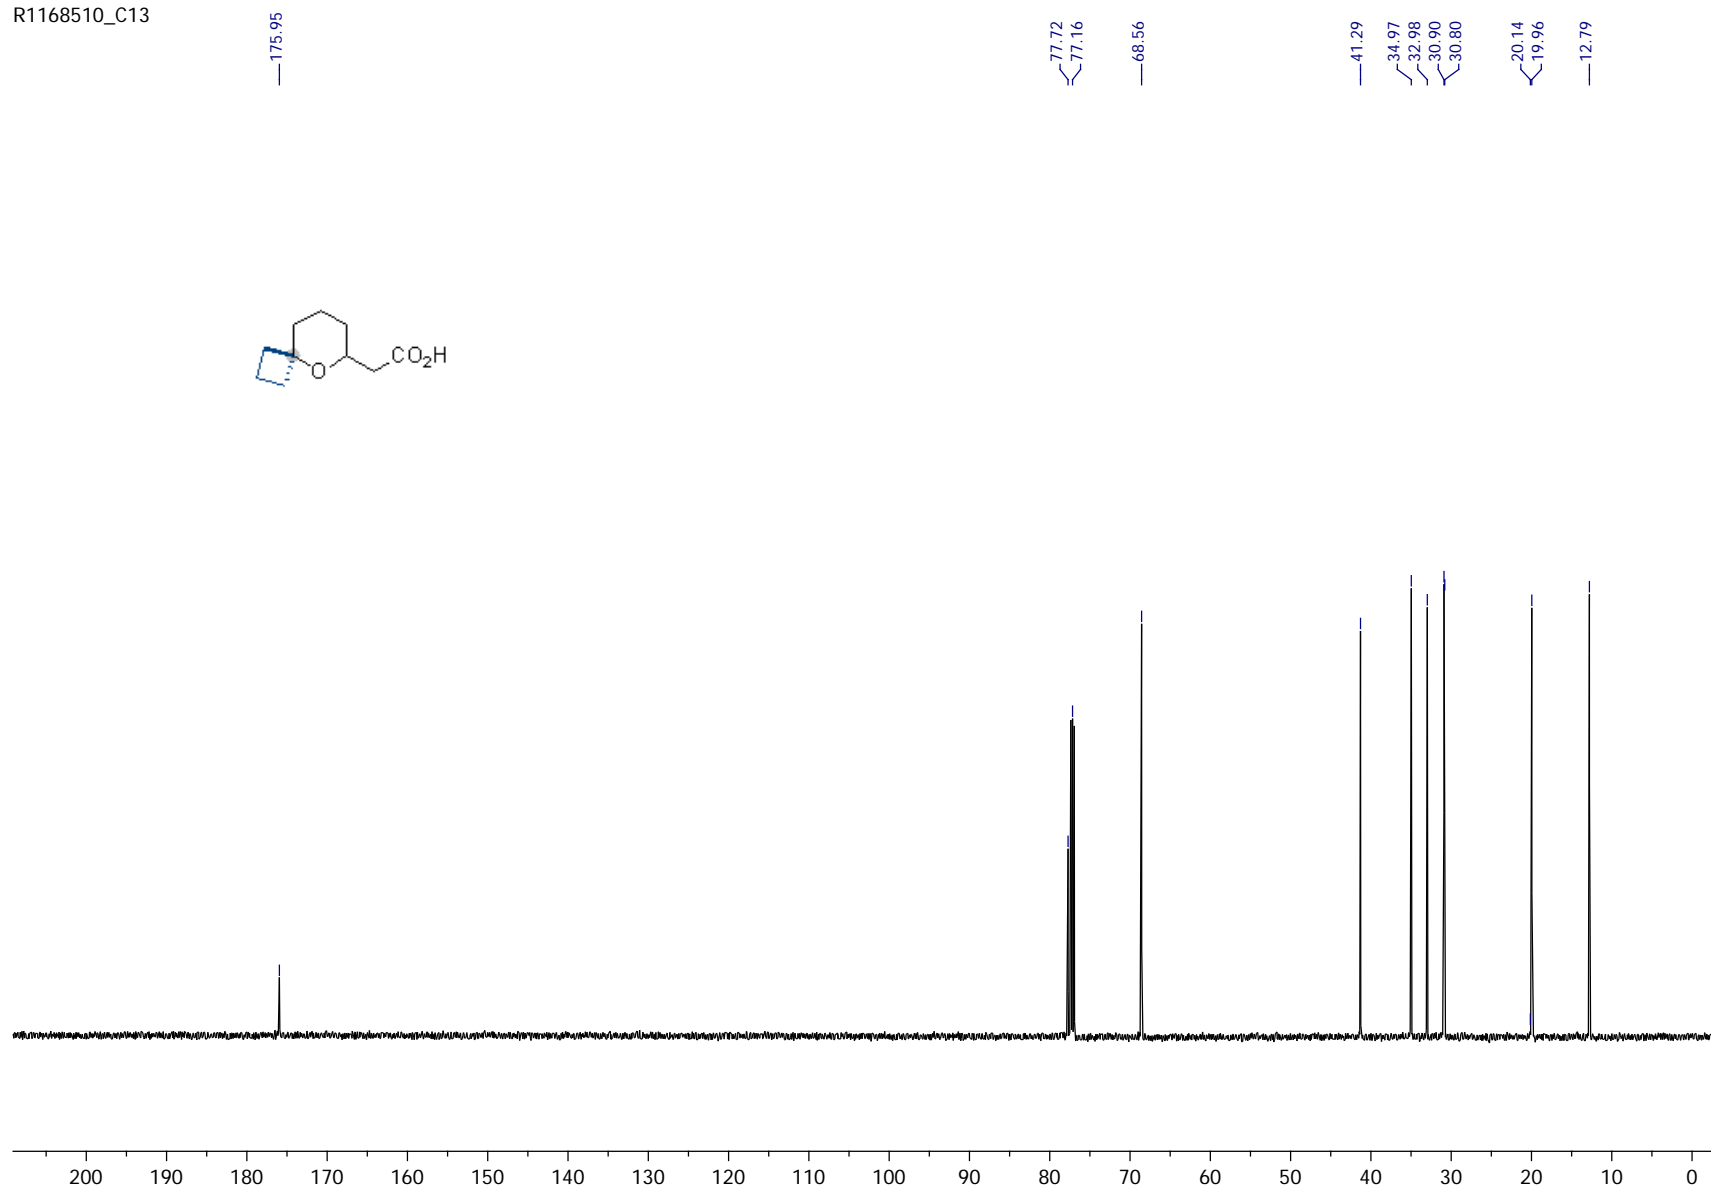

Compound 40f

R1725301

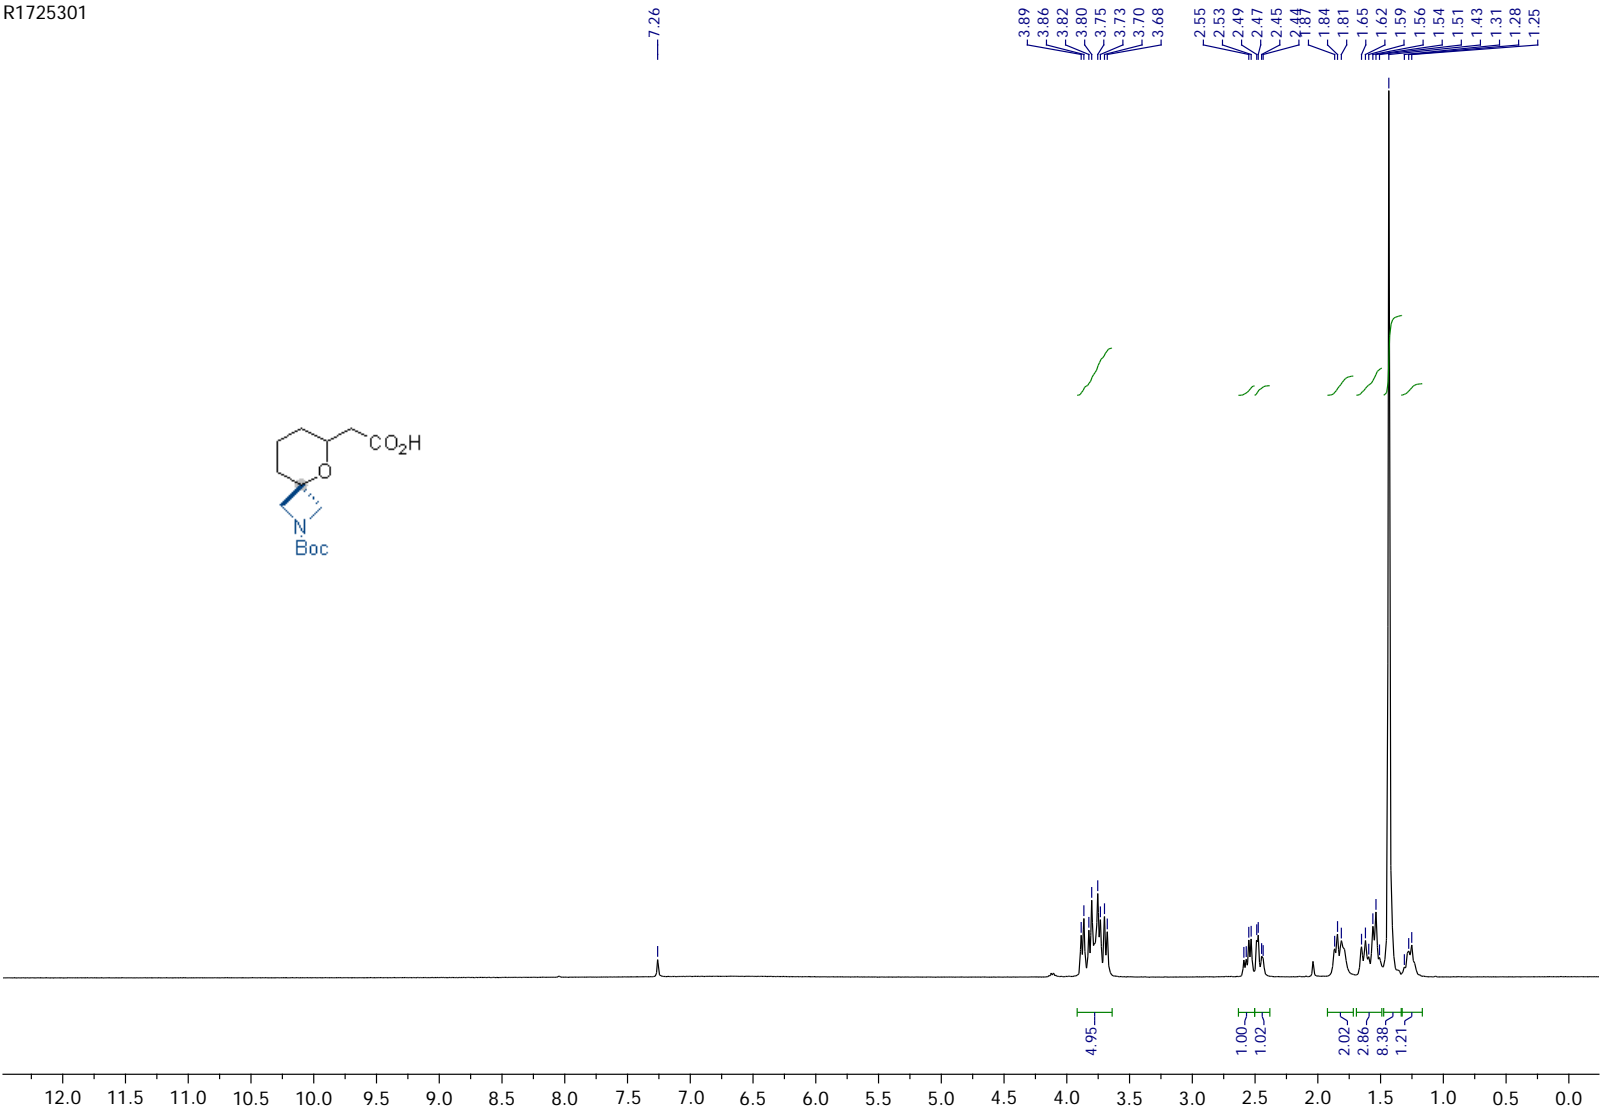

R1725301\_C13

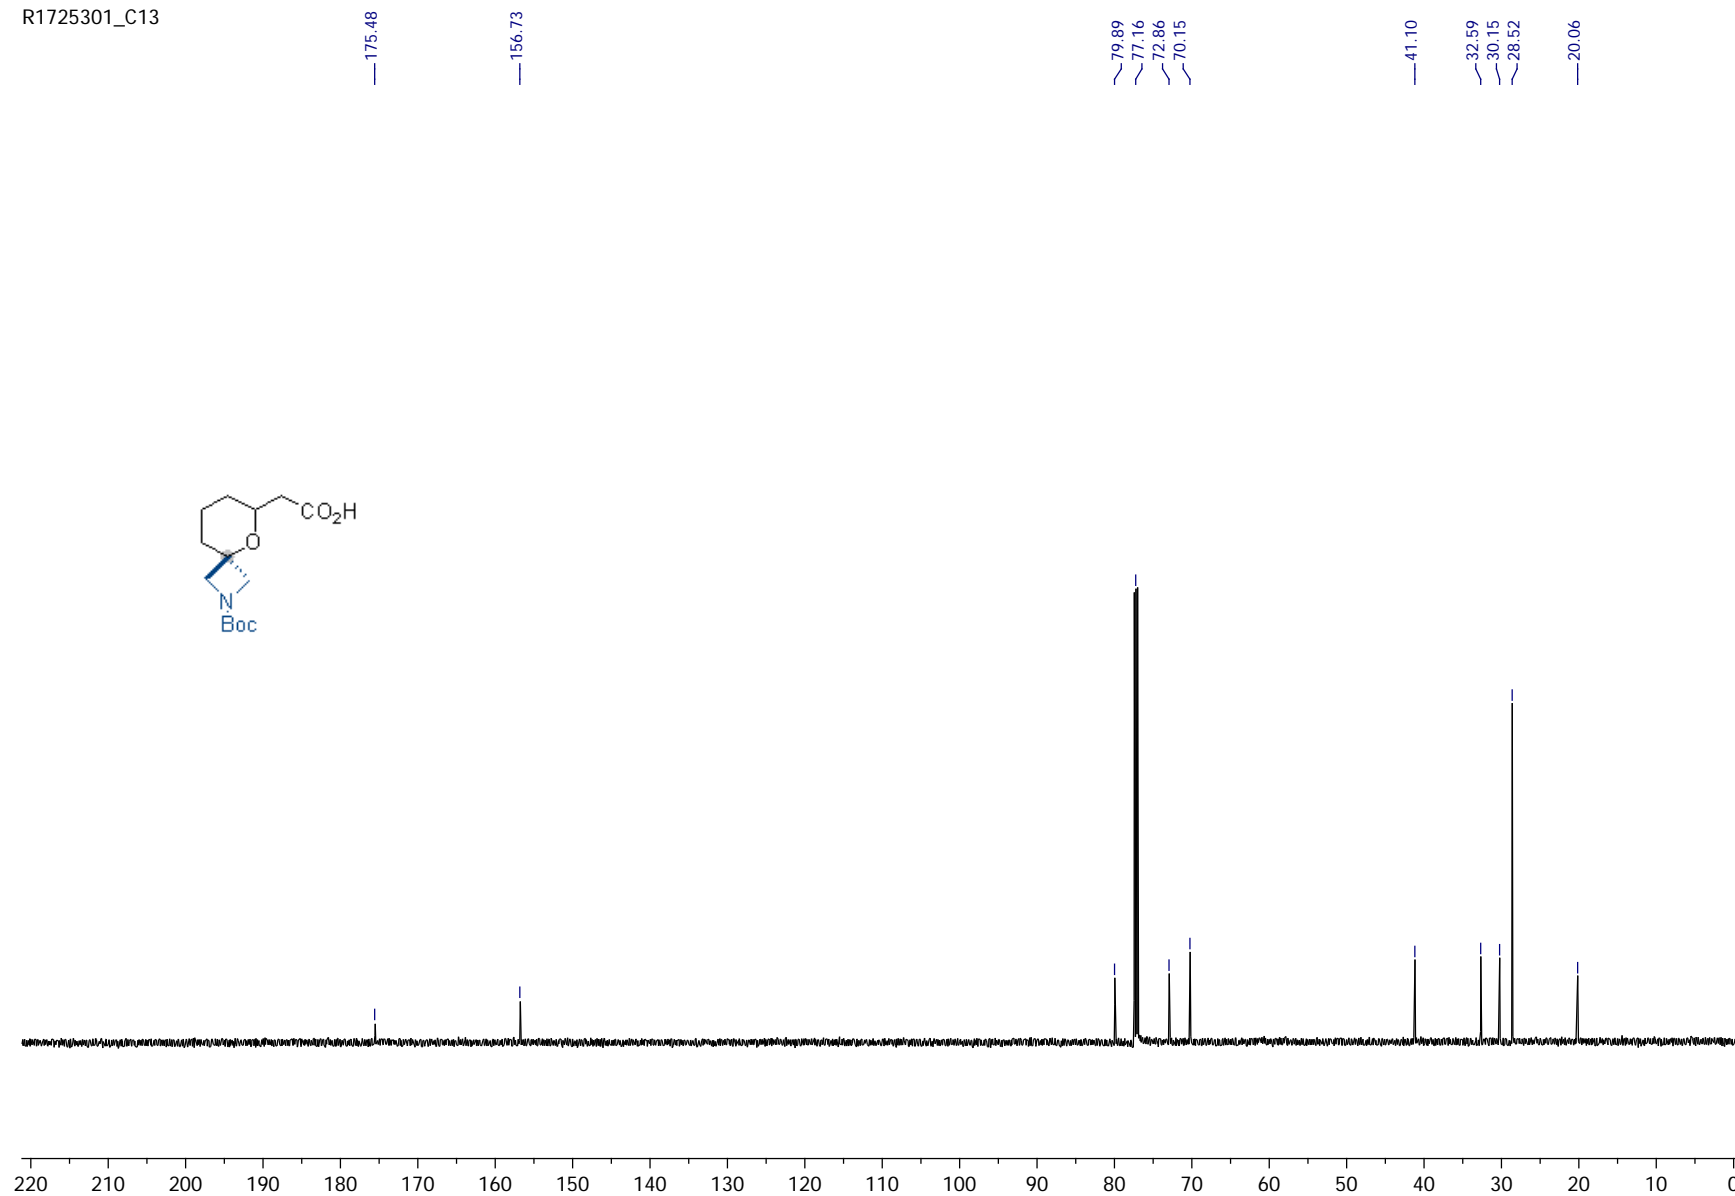



Compound 44f

R1659821

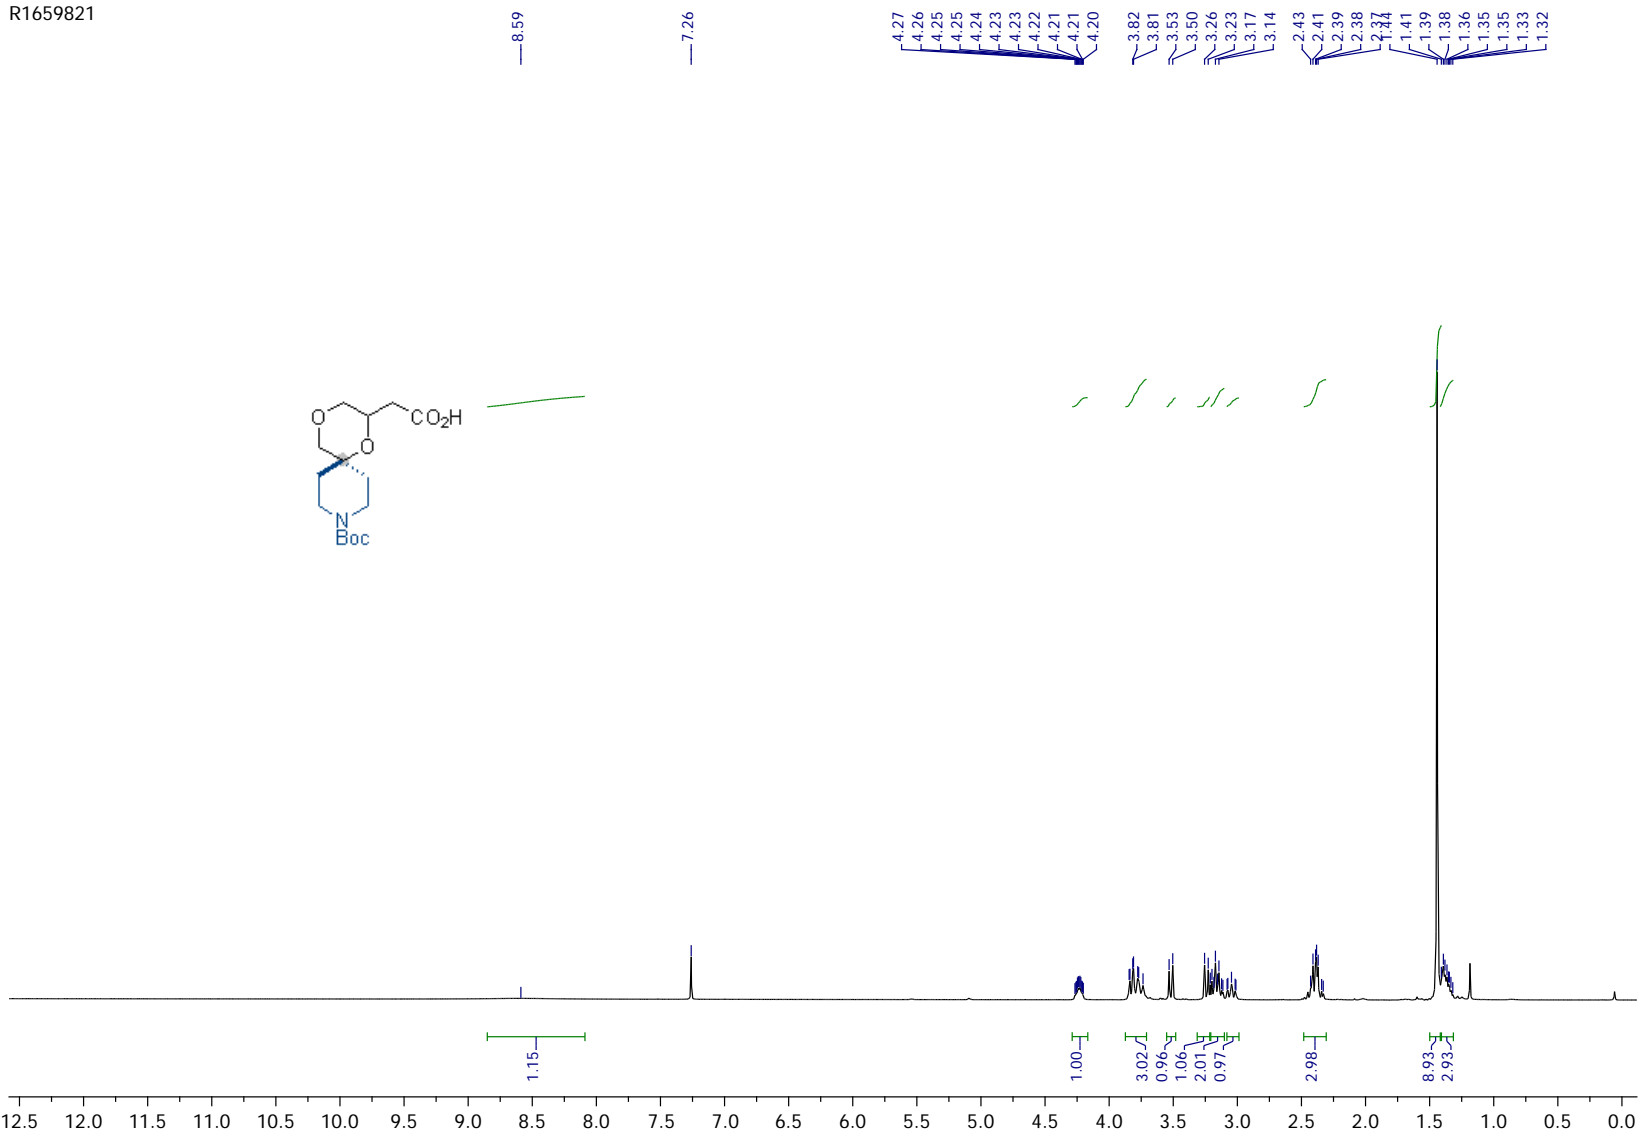

R1659821\_C13

#####

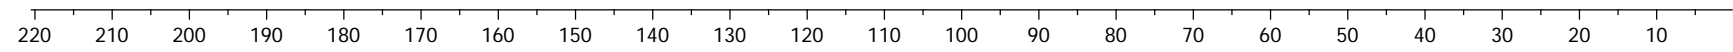

Compound 8g

R1499603

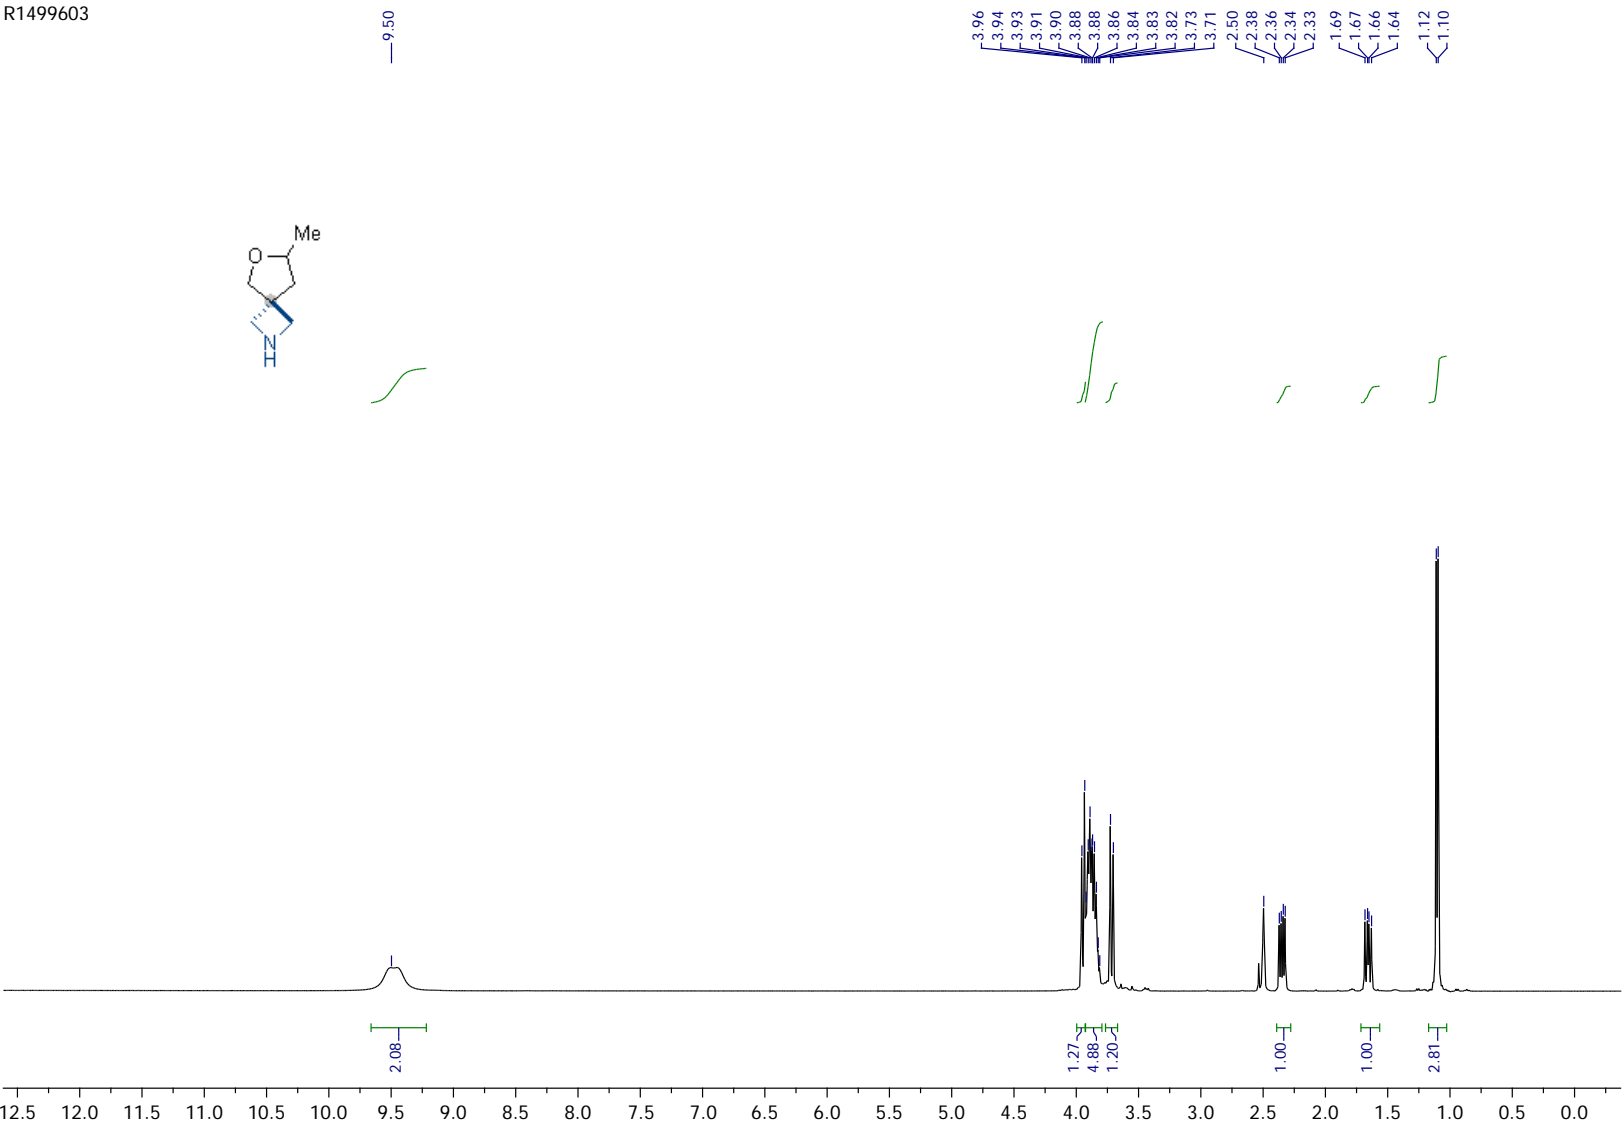

R1499603\_C13

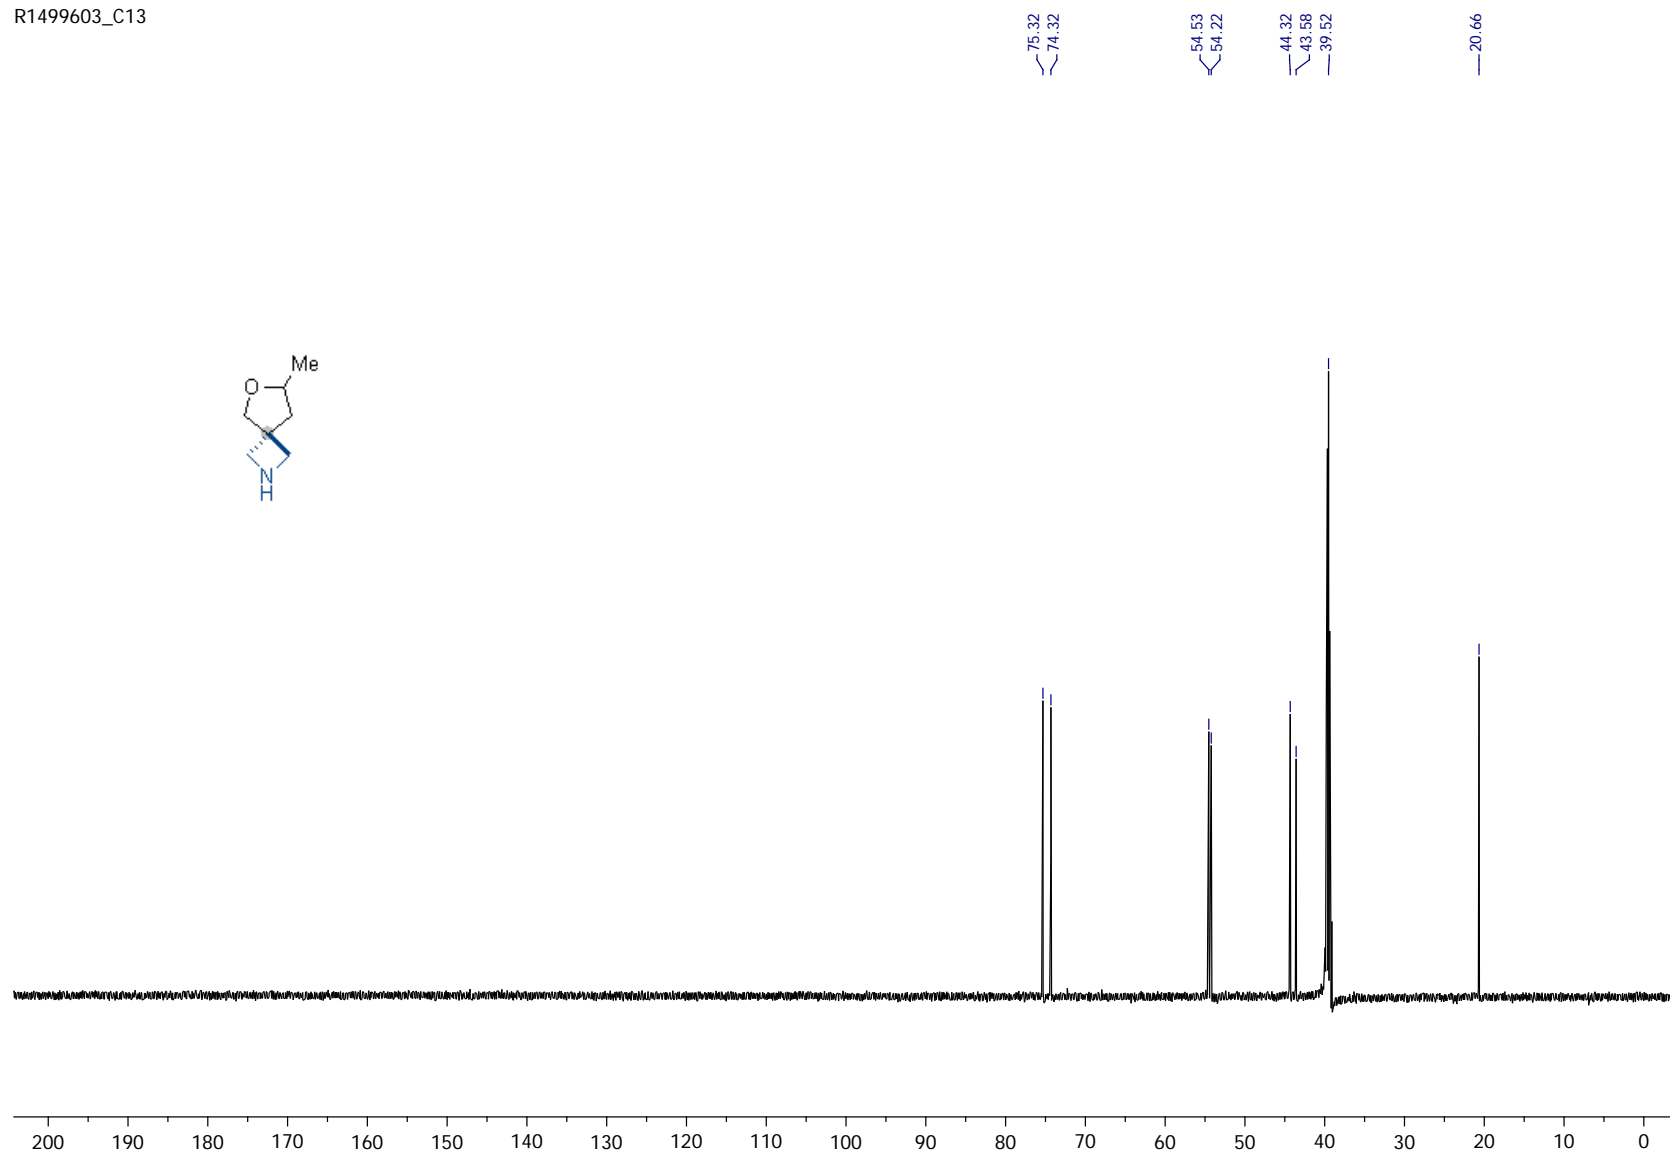

# Compound 35g

R1741523

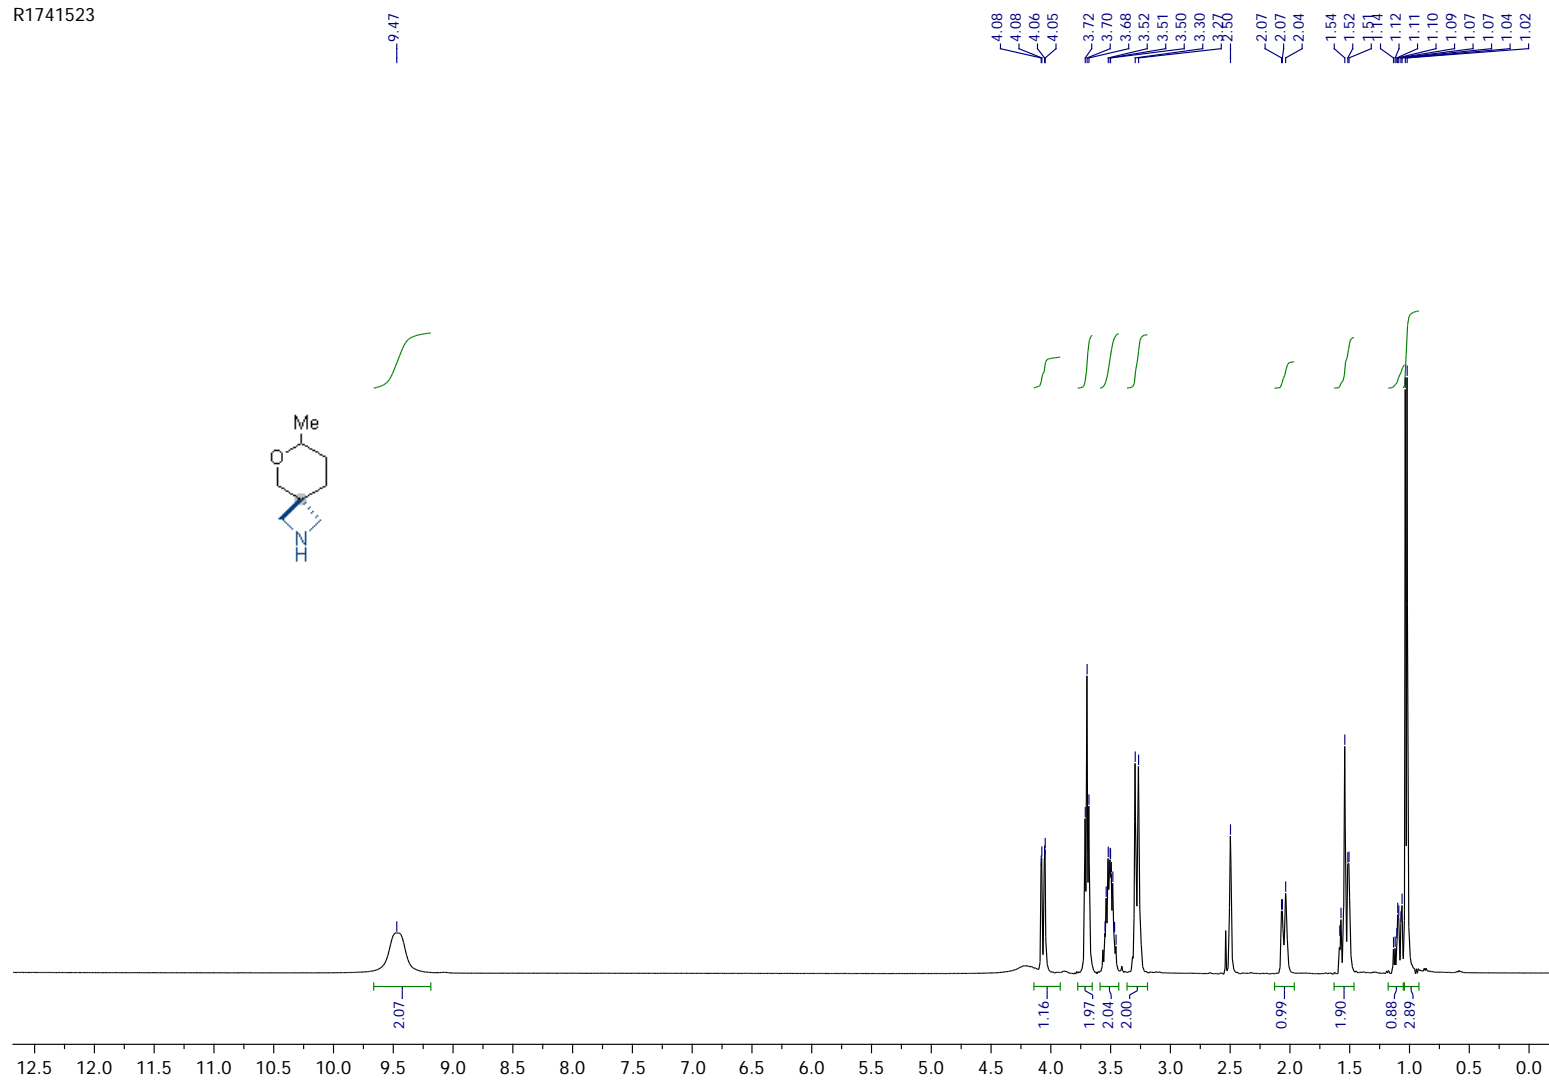

R1741523\_C13

XXXXXXXXXXXXXXXXXXXX

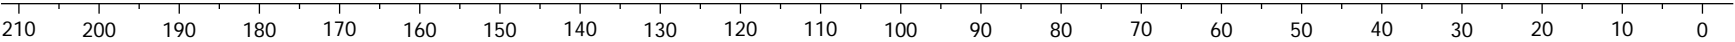

Compound 45g

R617136

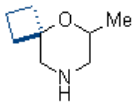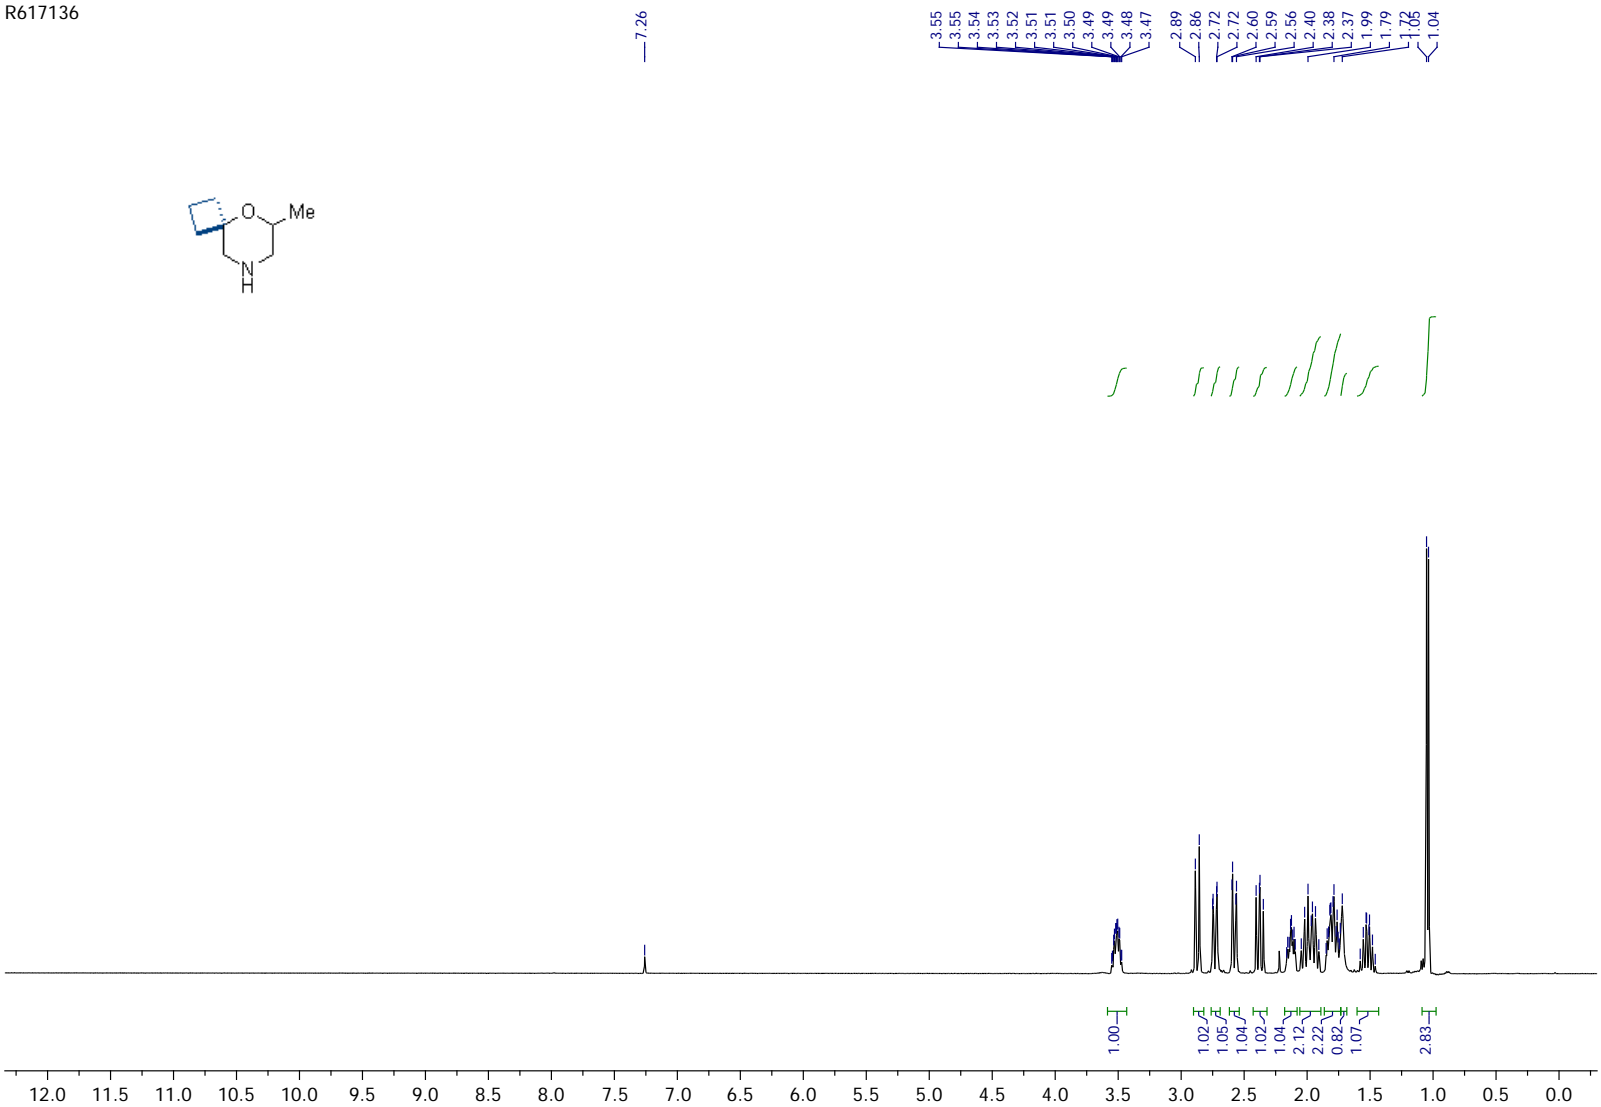

R617136\_13C

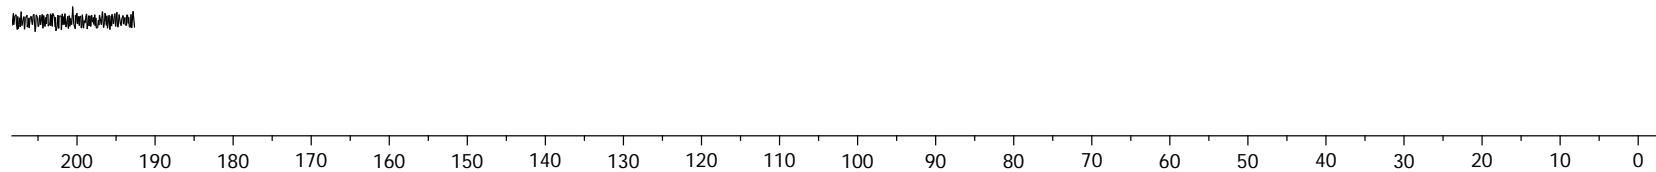



Compound 46g

R2402676

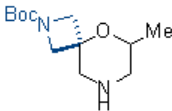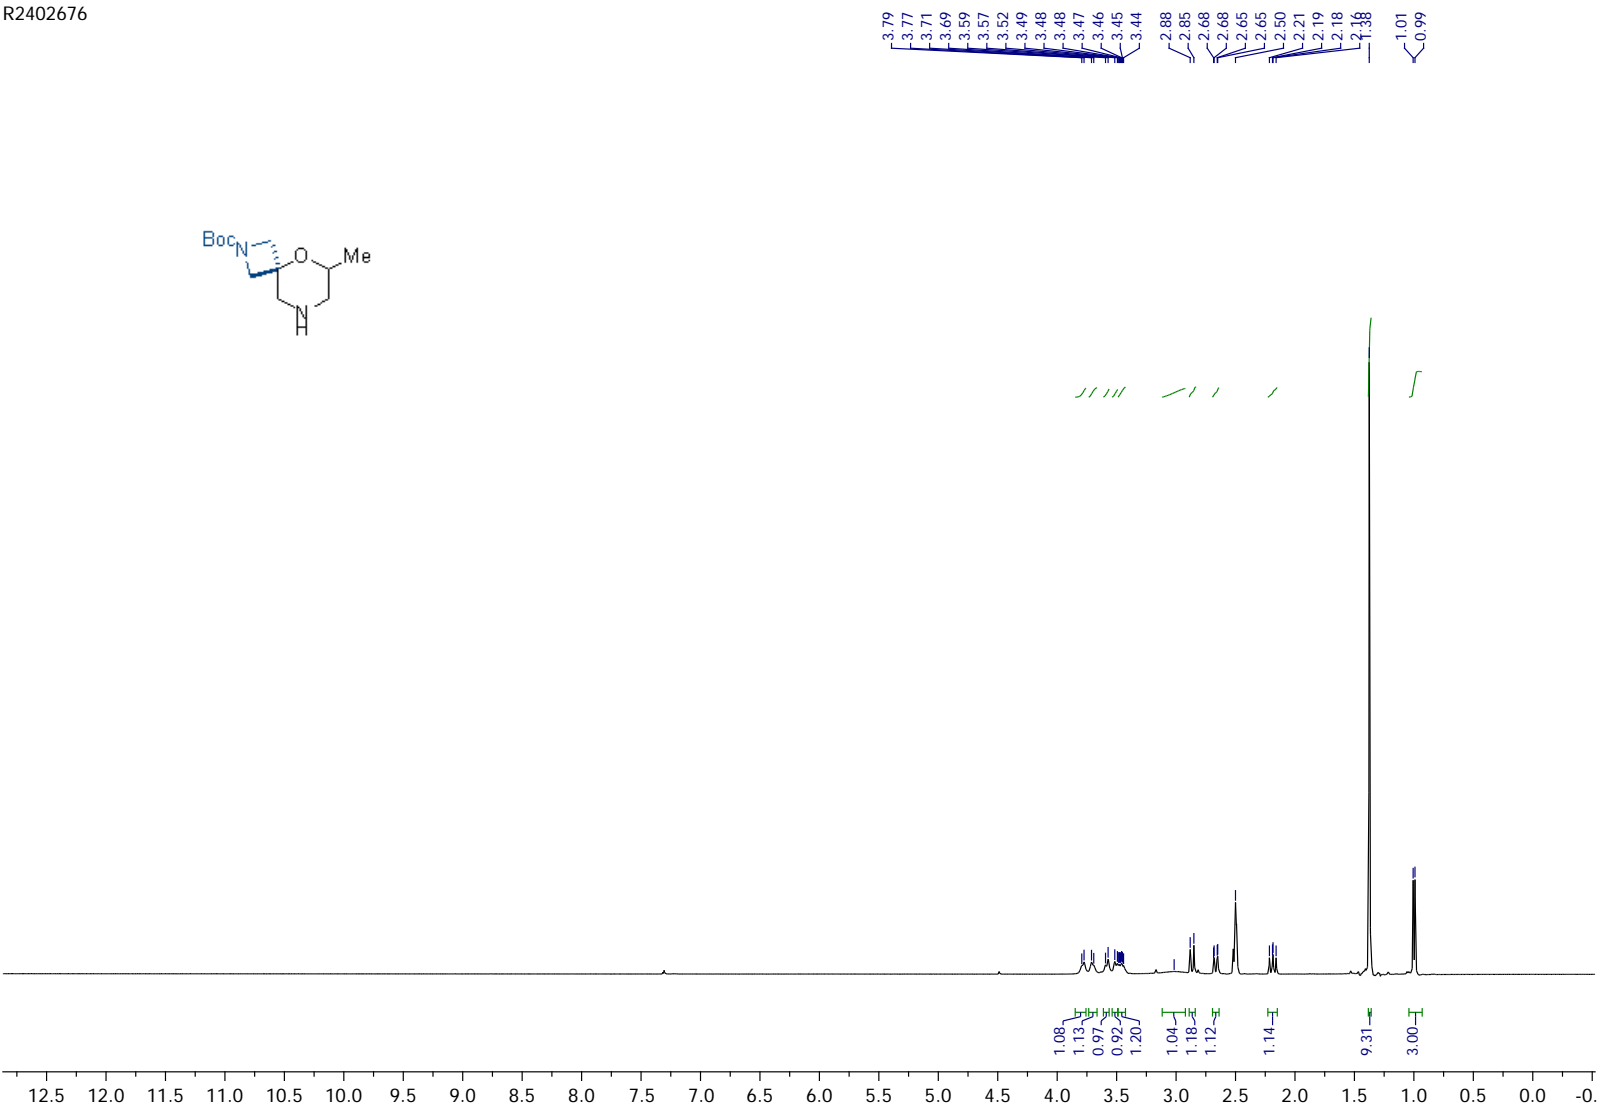

R2402676\_C13

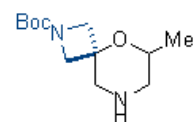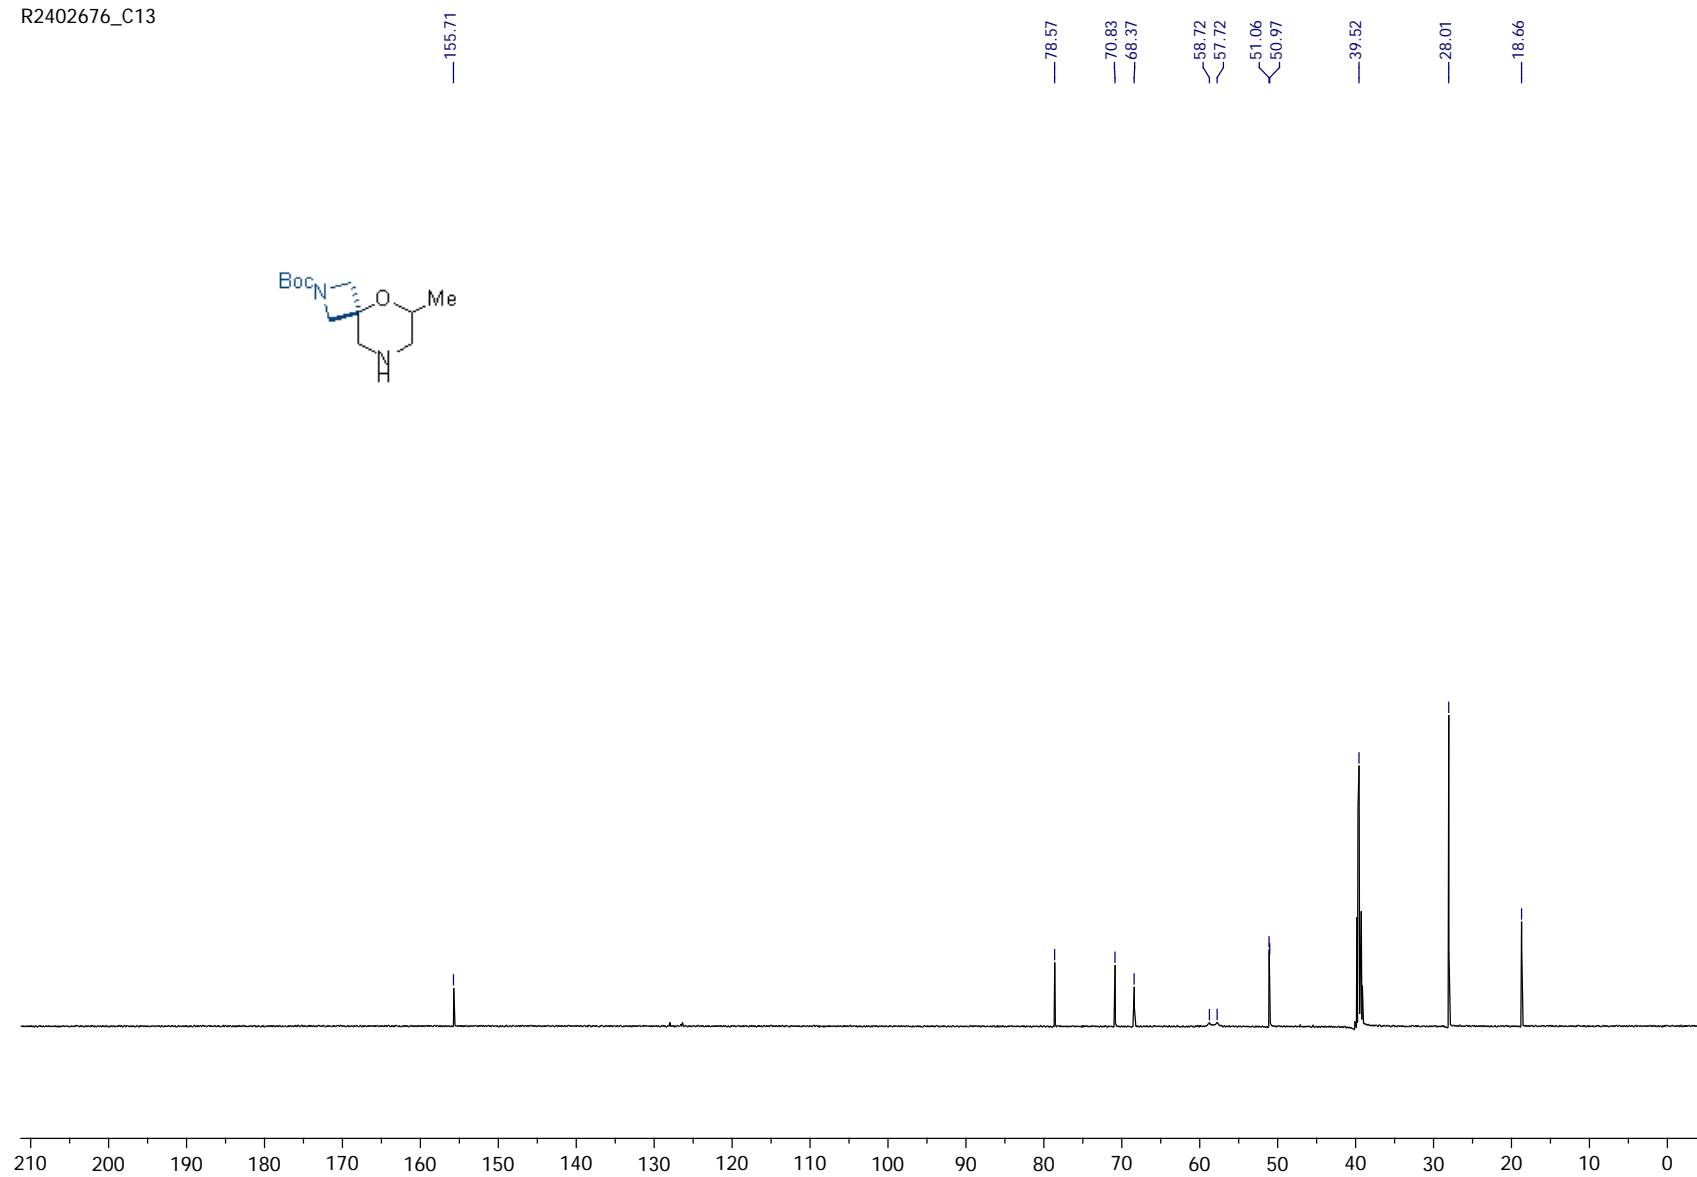

Compound 47g

R2401571

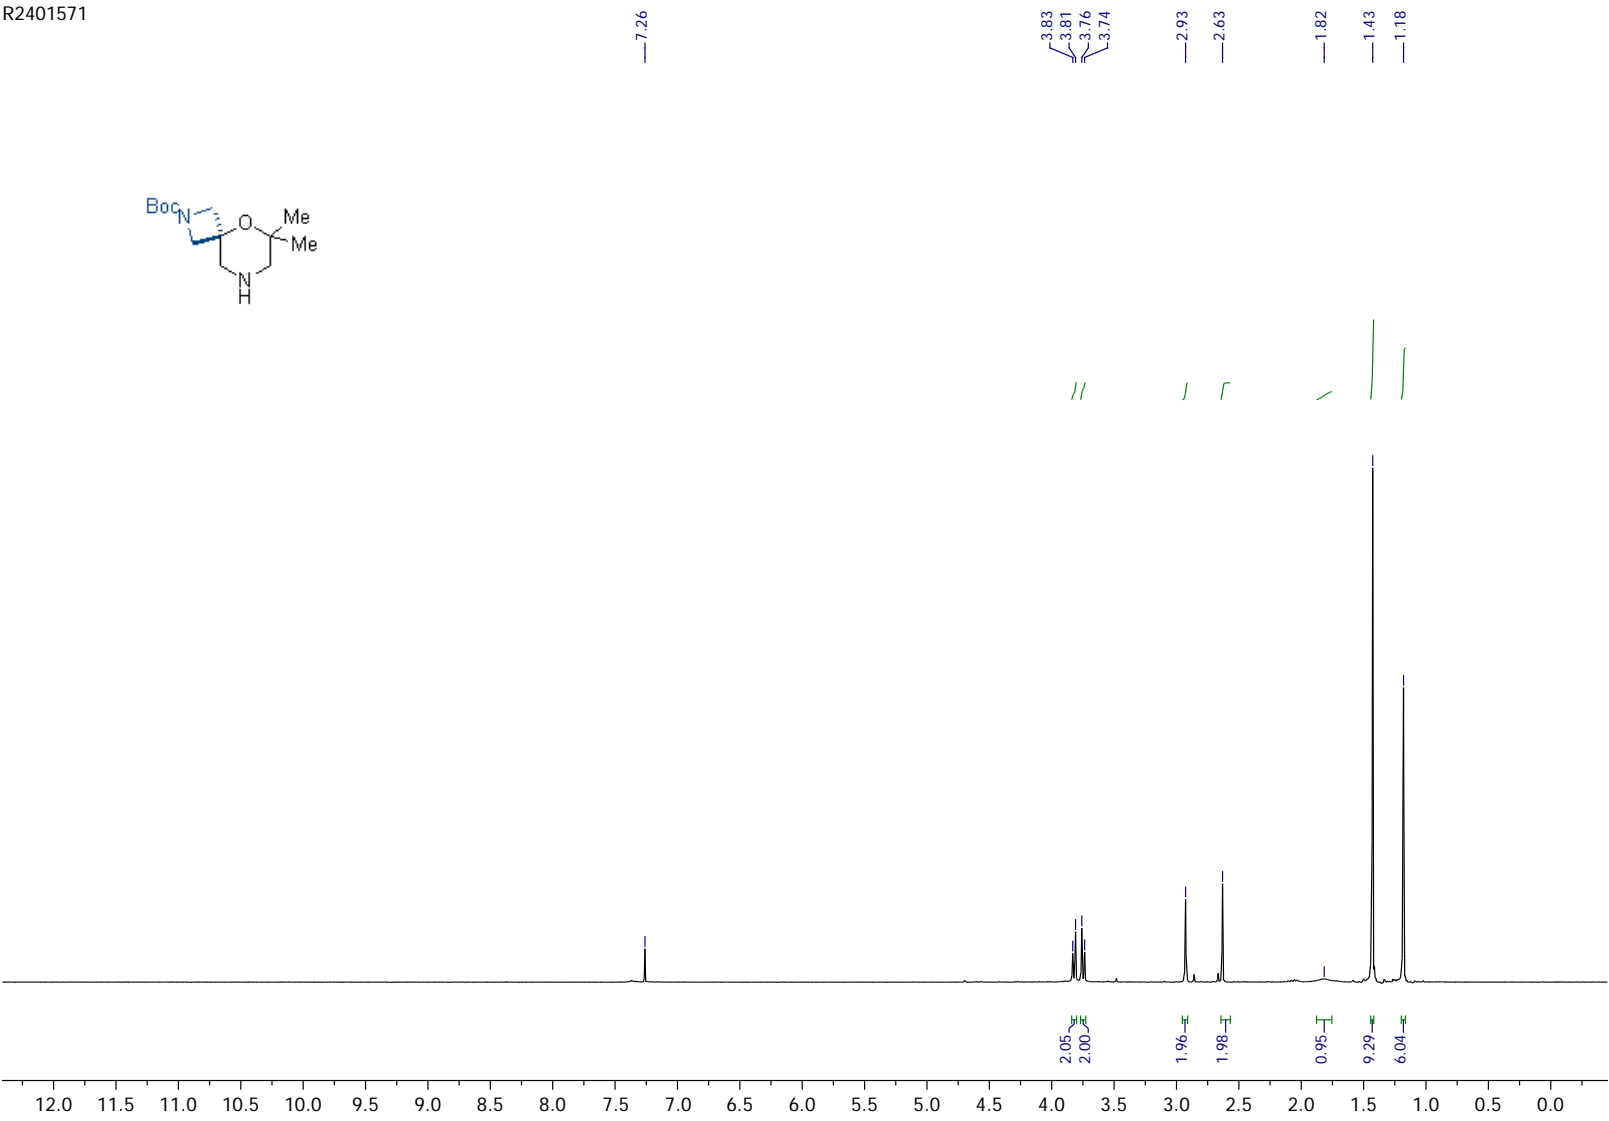

R2401571\_C13

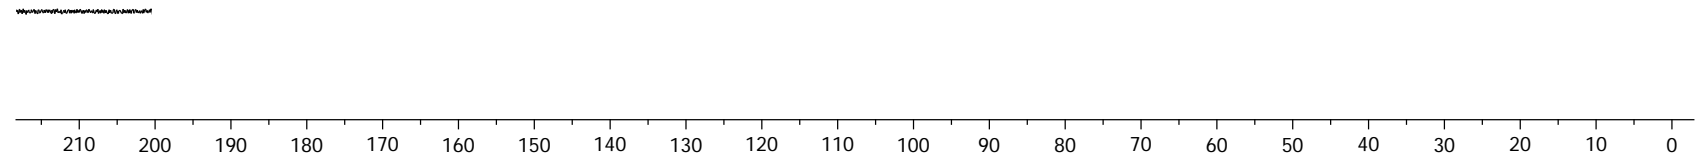

Compound 48g

R251344

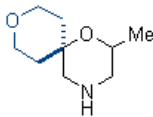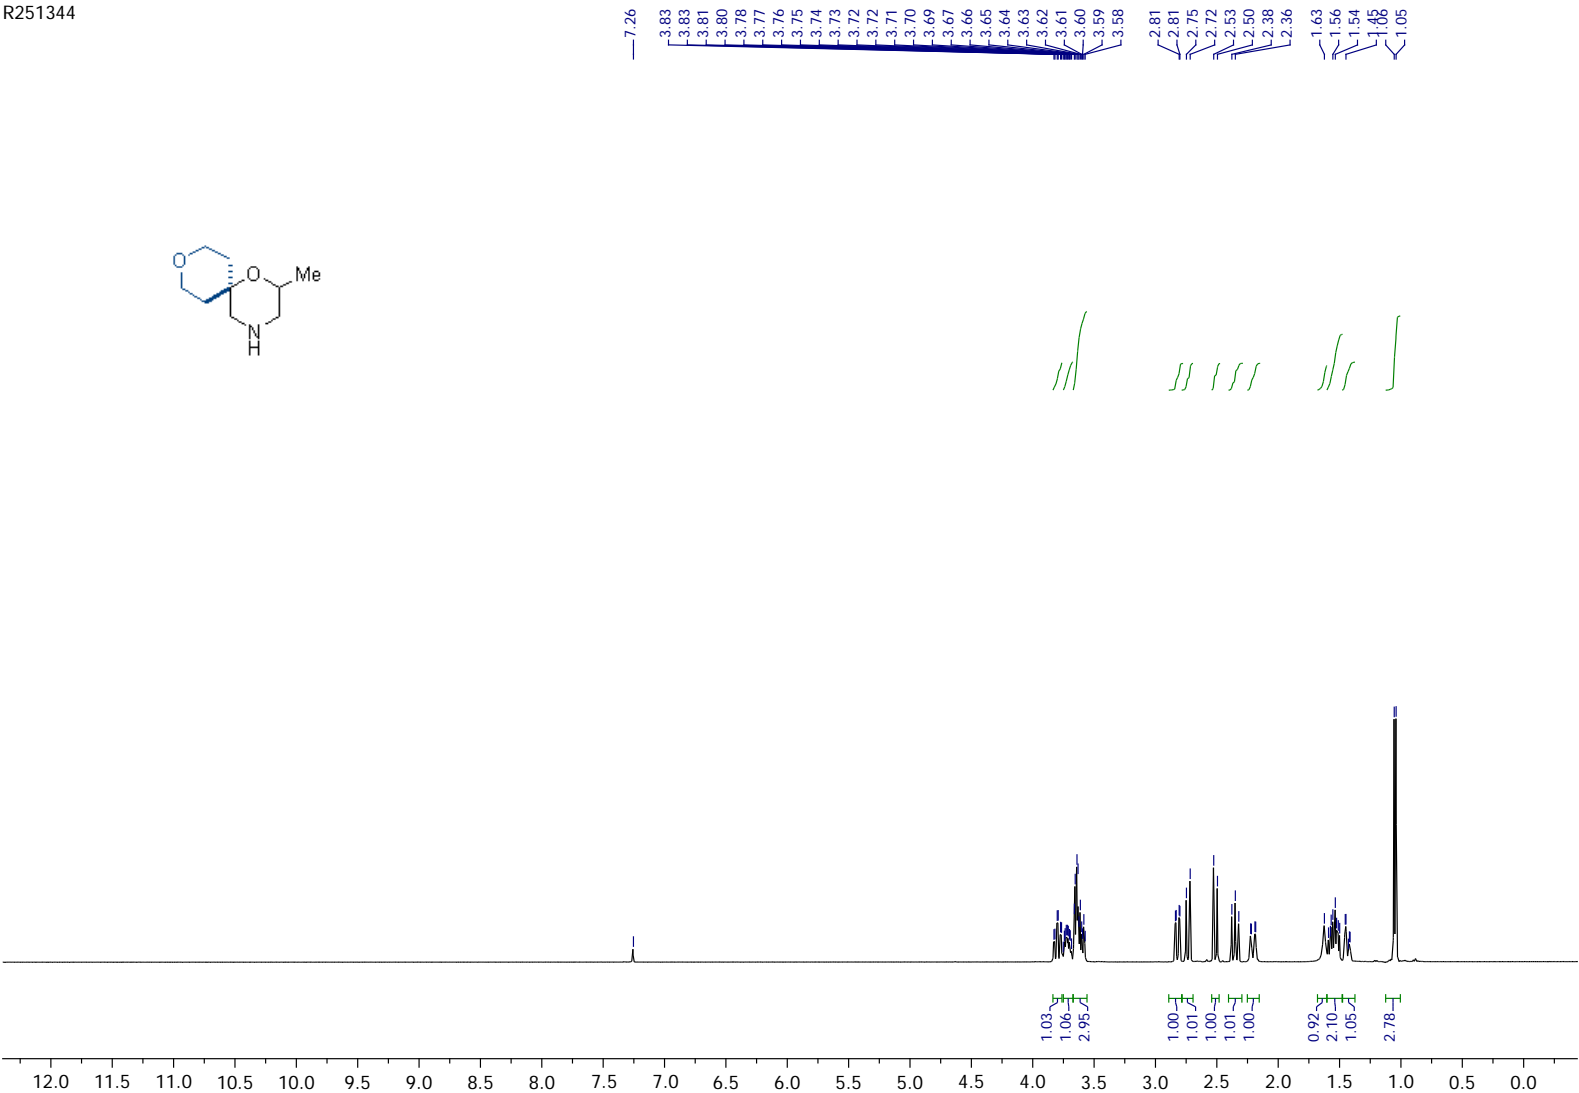

R251344\_13C

=====

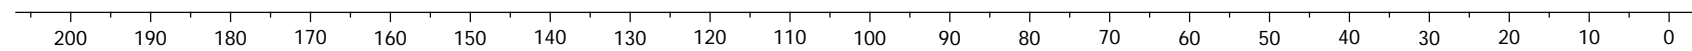

Compound 6h

R1399220

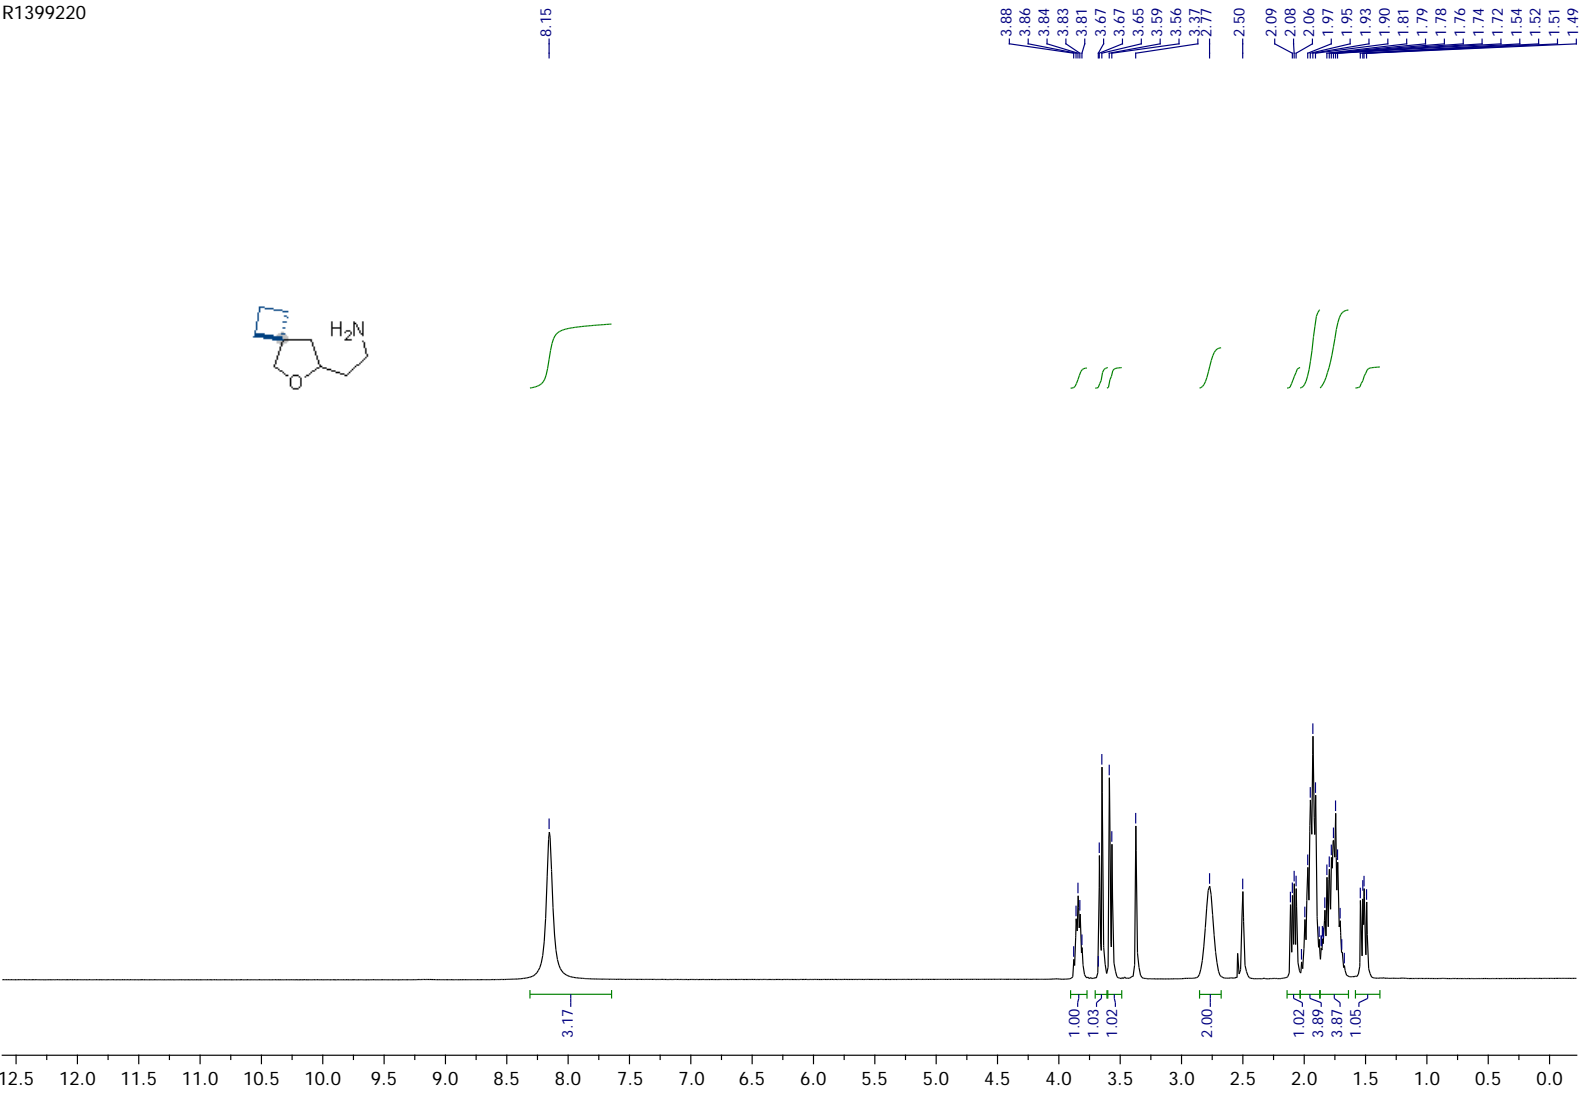

R1399220\_C13

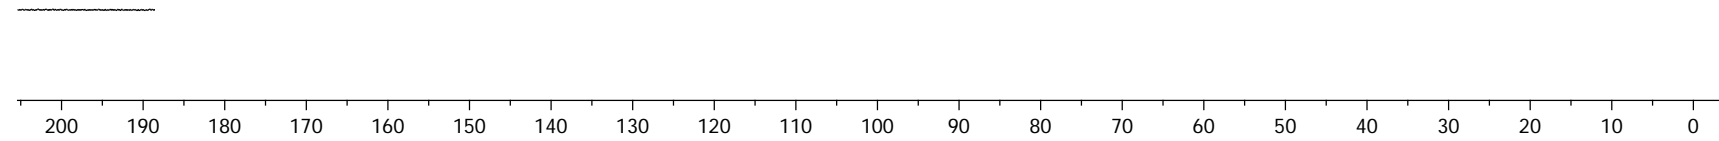



Compound 18h

R890685

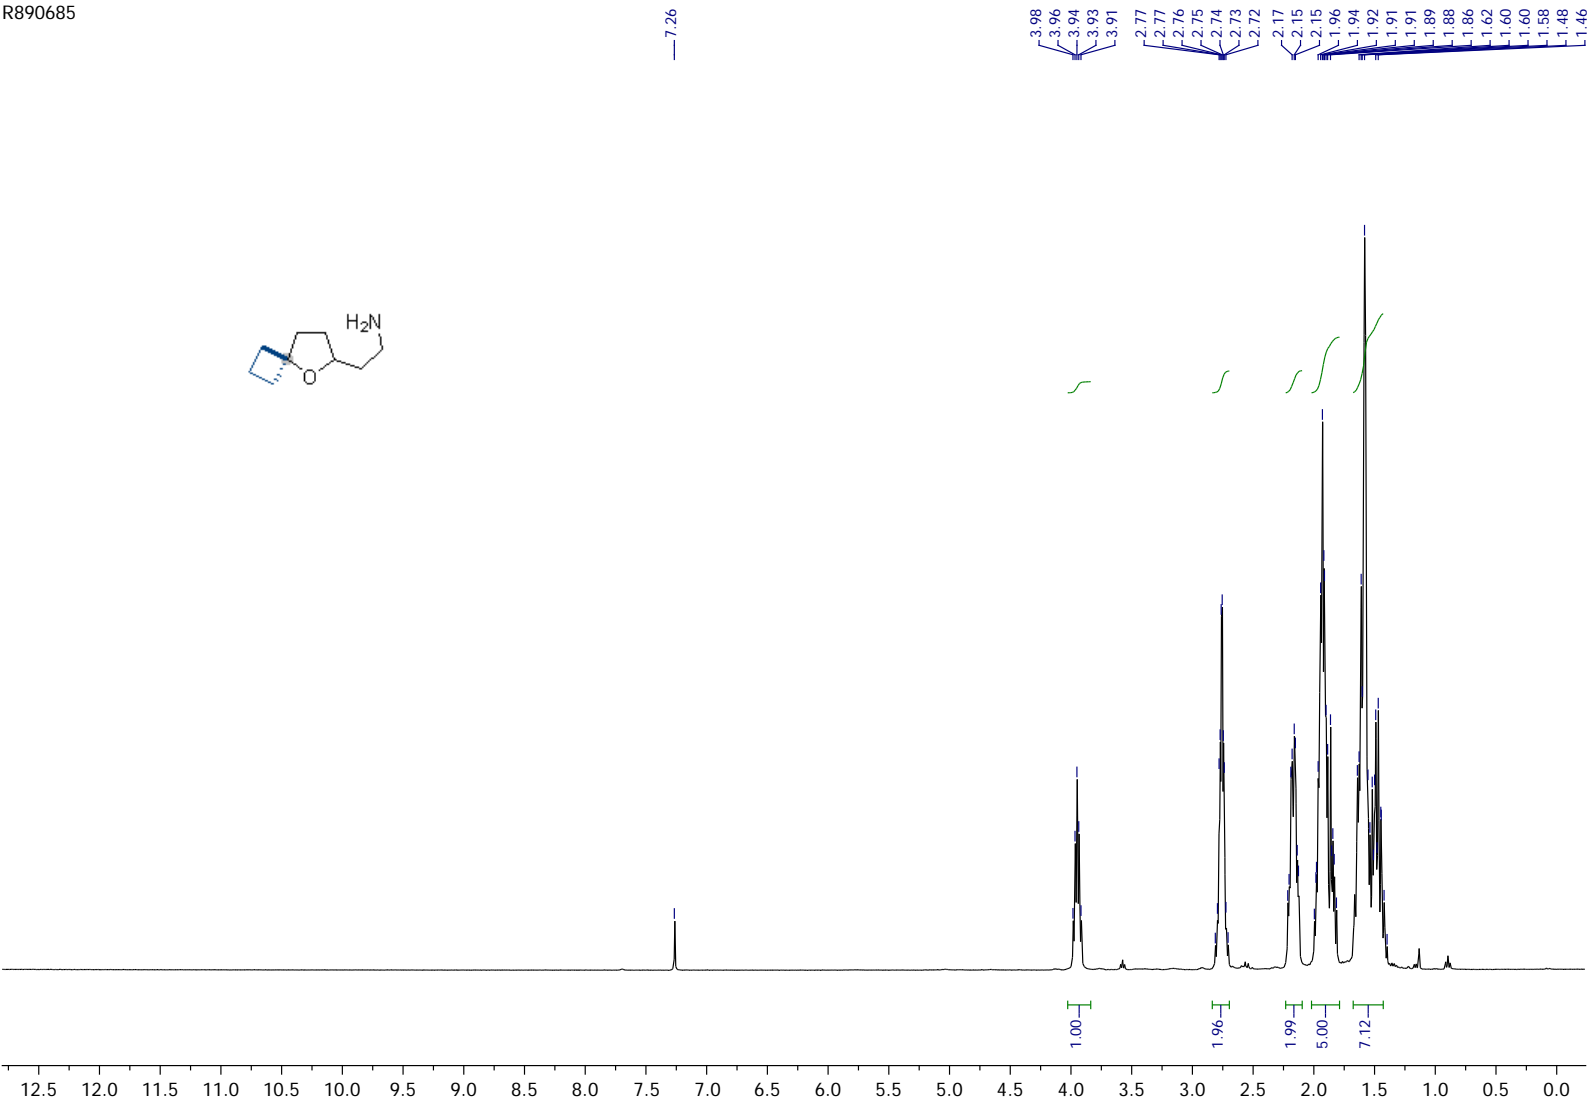

R890685\_C13

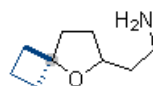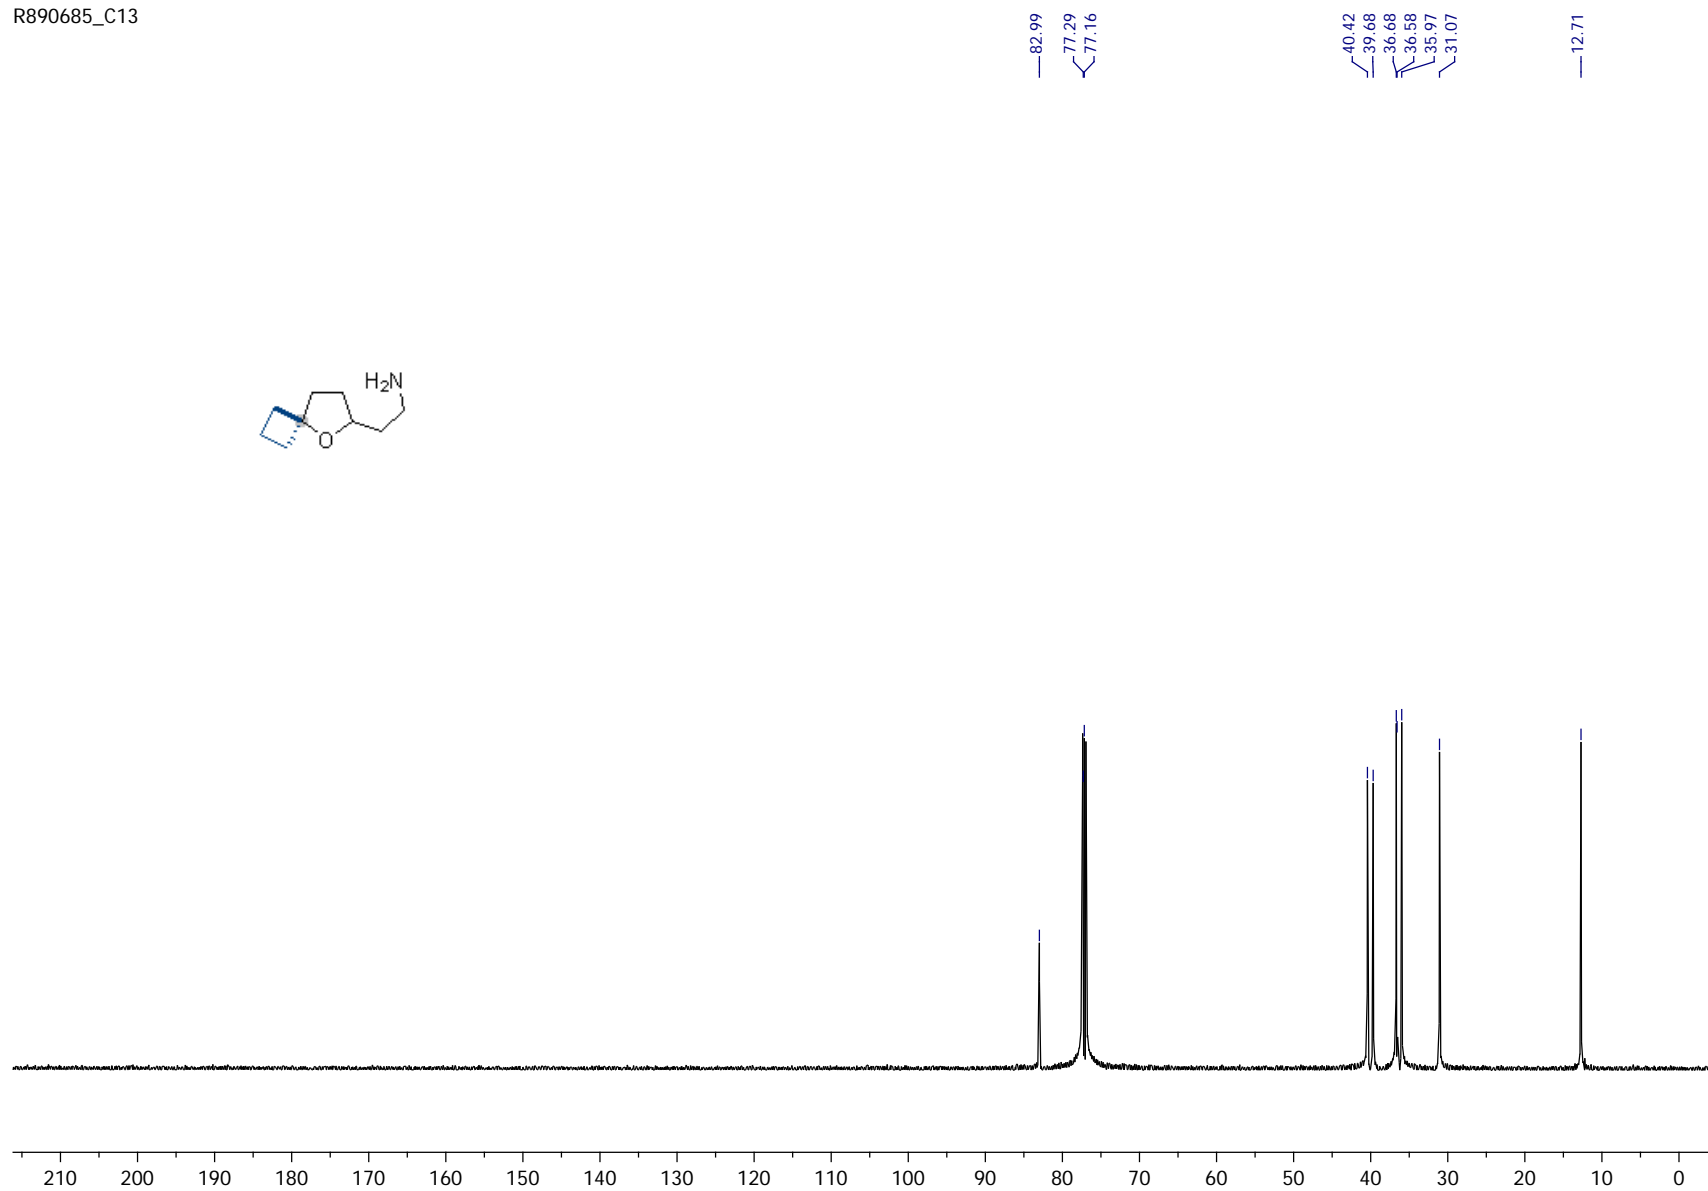

# Compound 36h

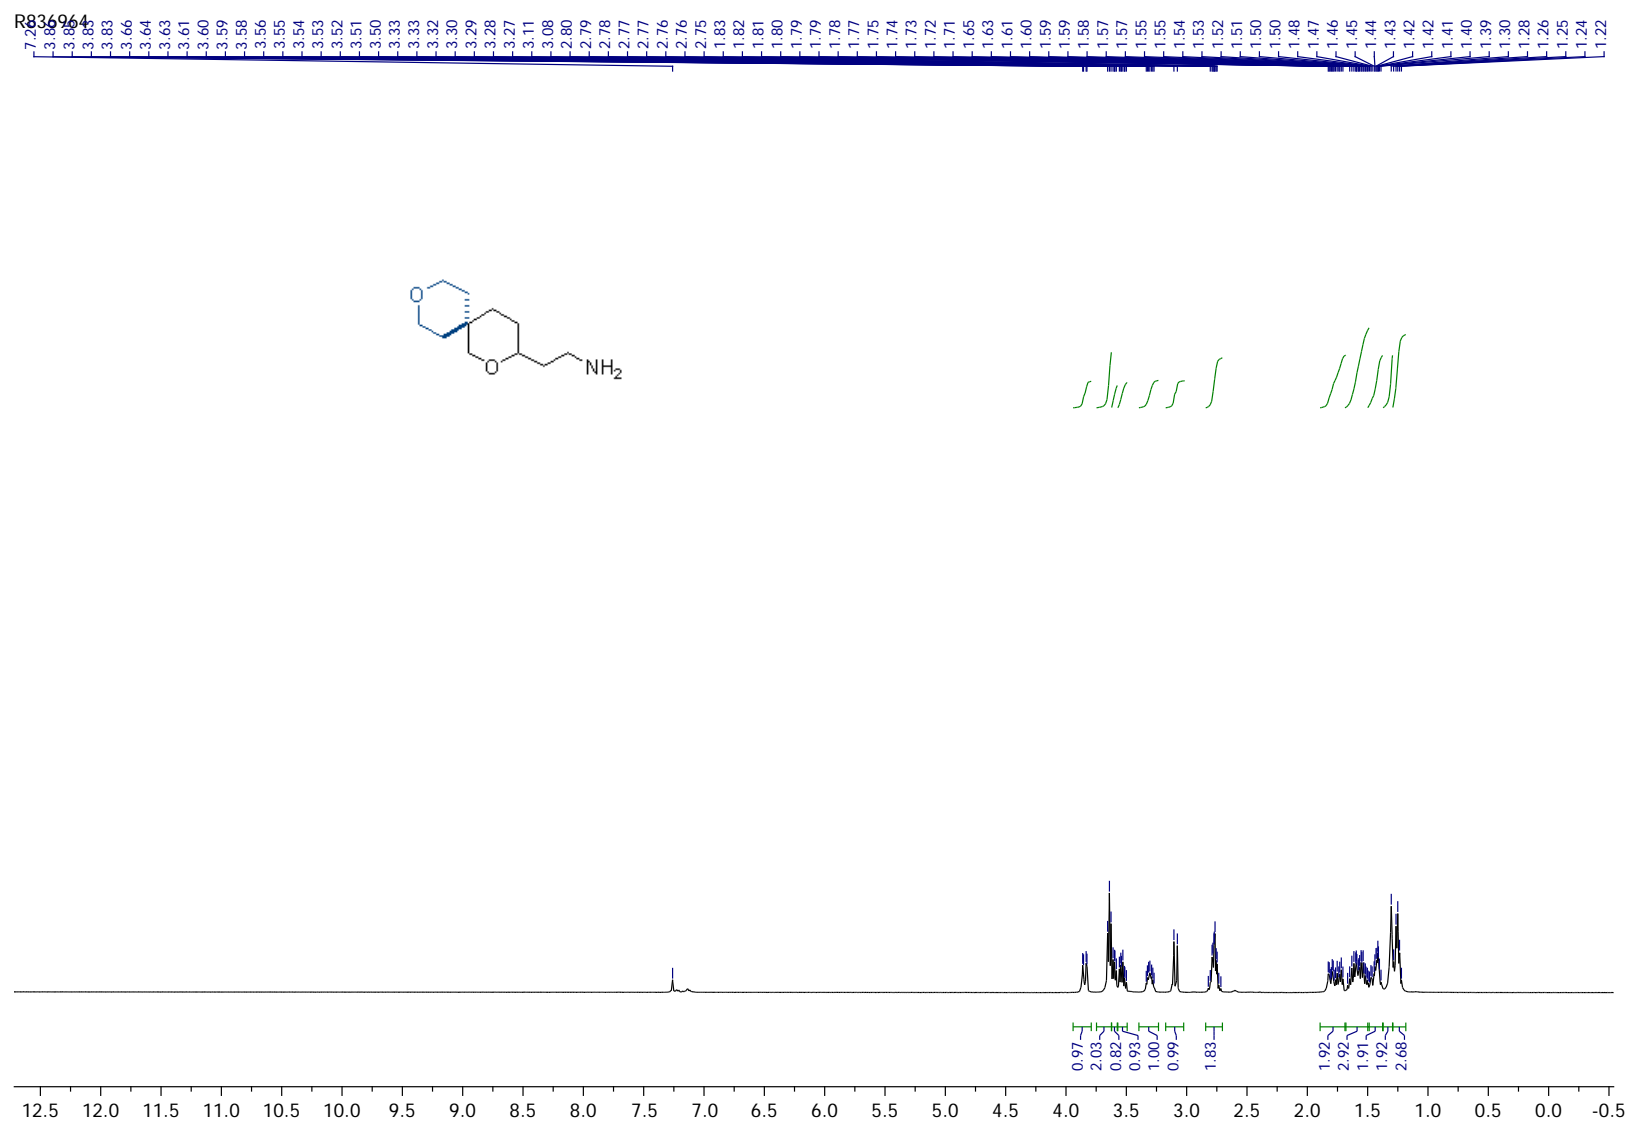

R836964\_13C

XXXXXXXXXXXXXXXXXXXX

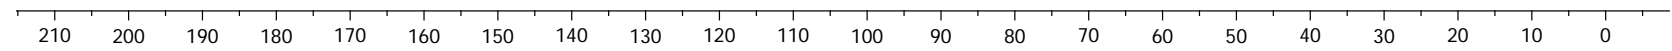

Compound 7i

R855467

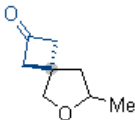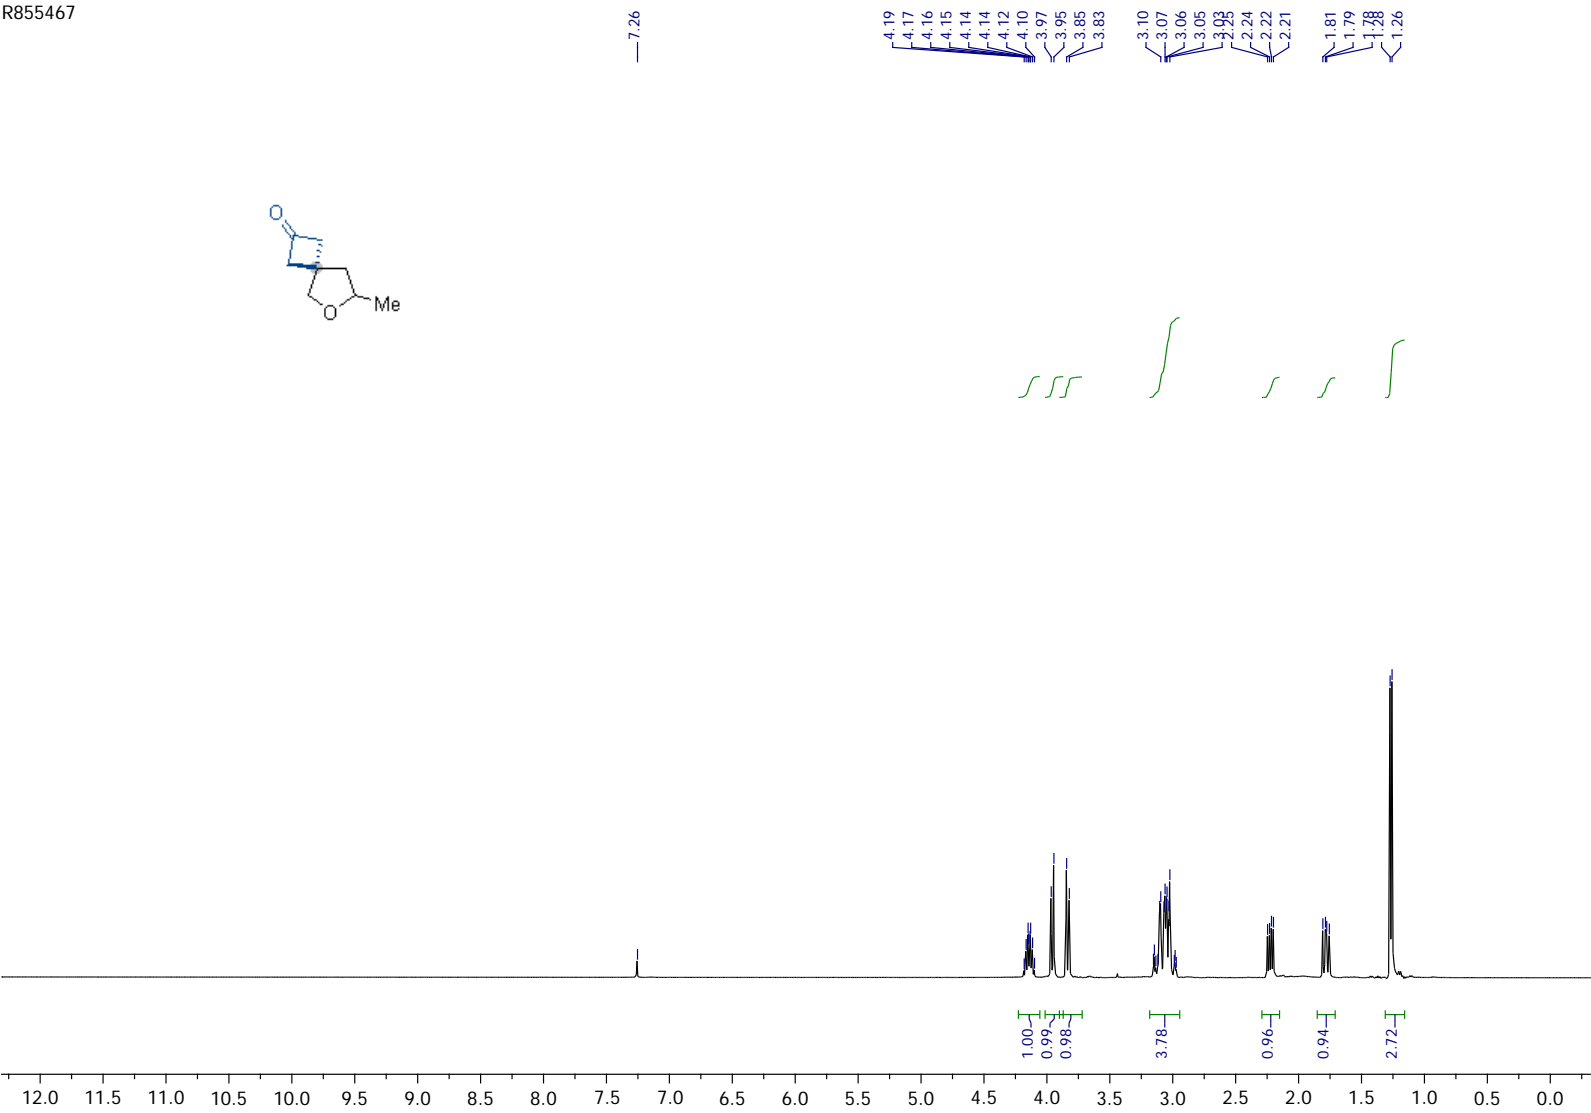

R855467\_C13

-----

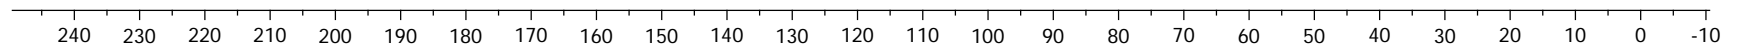

# Compound 50

lew-1701-1

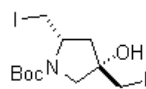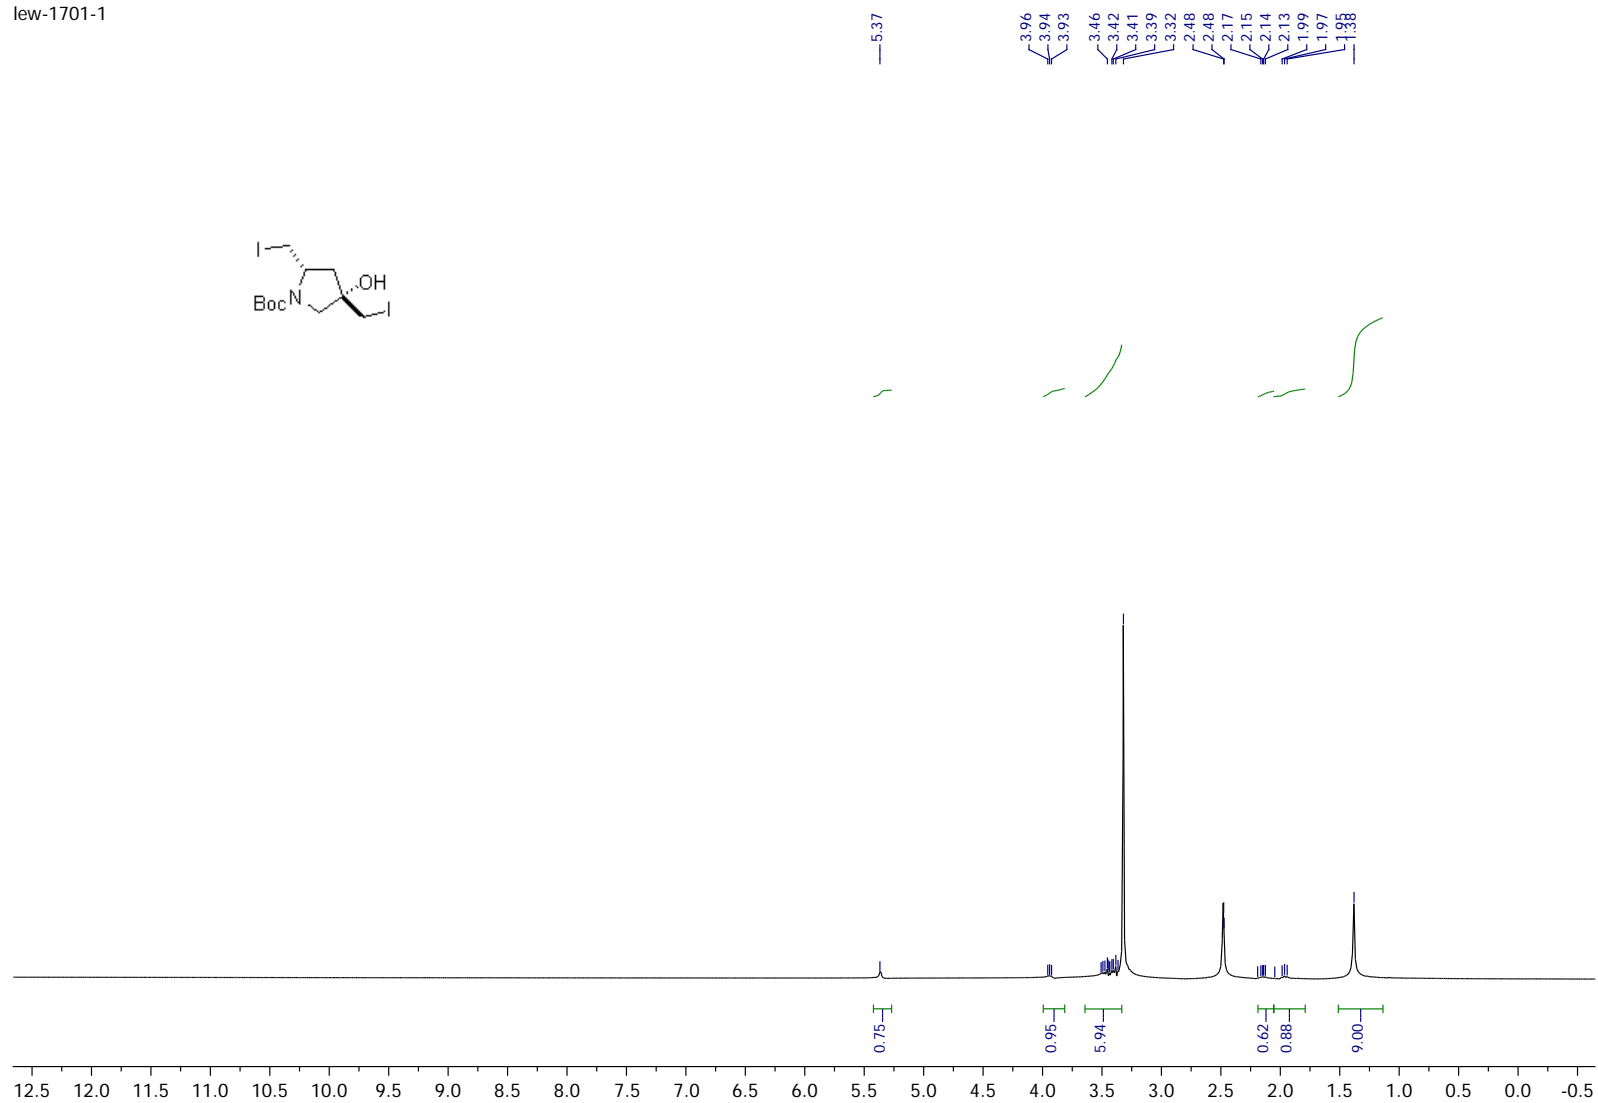

lew-1701-1\_C13

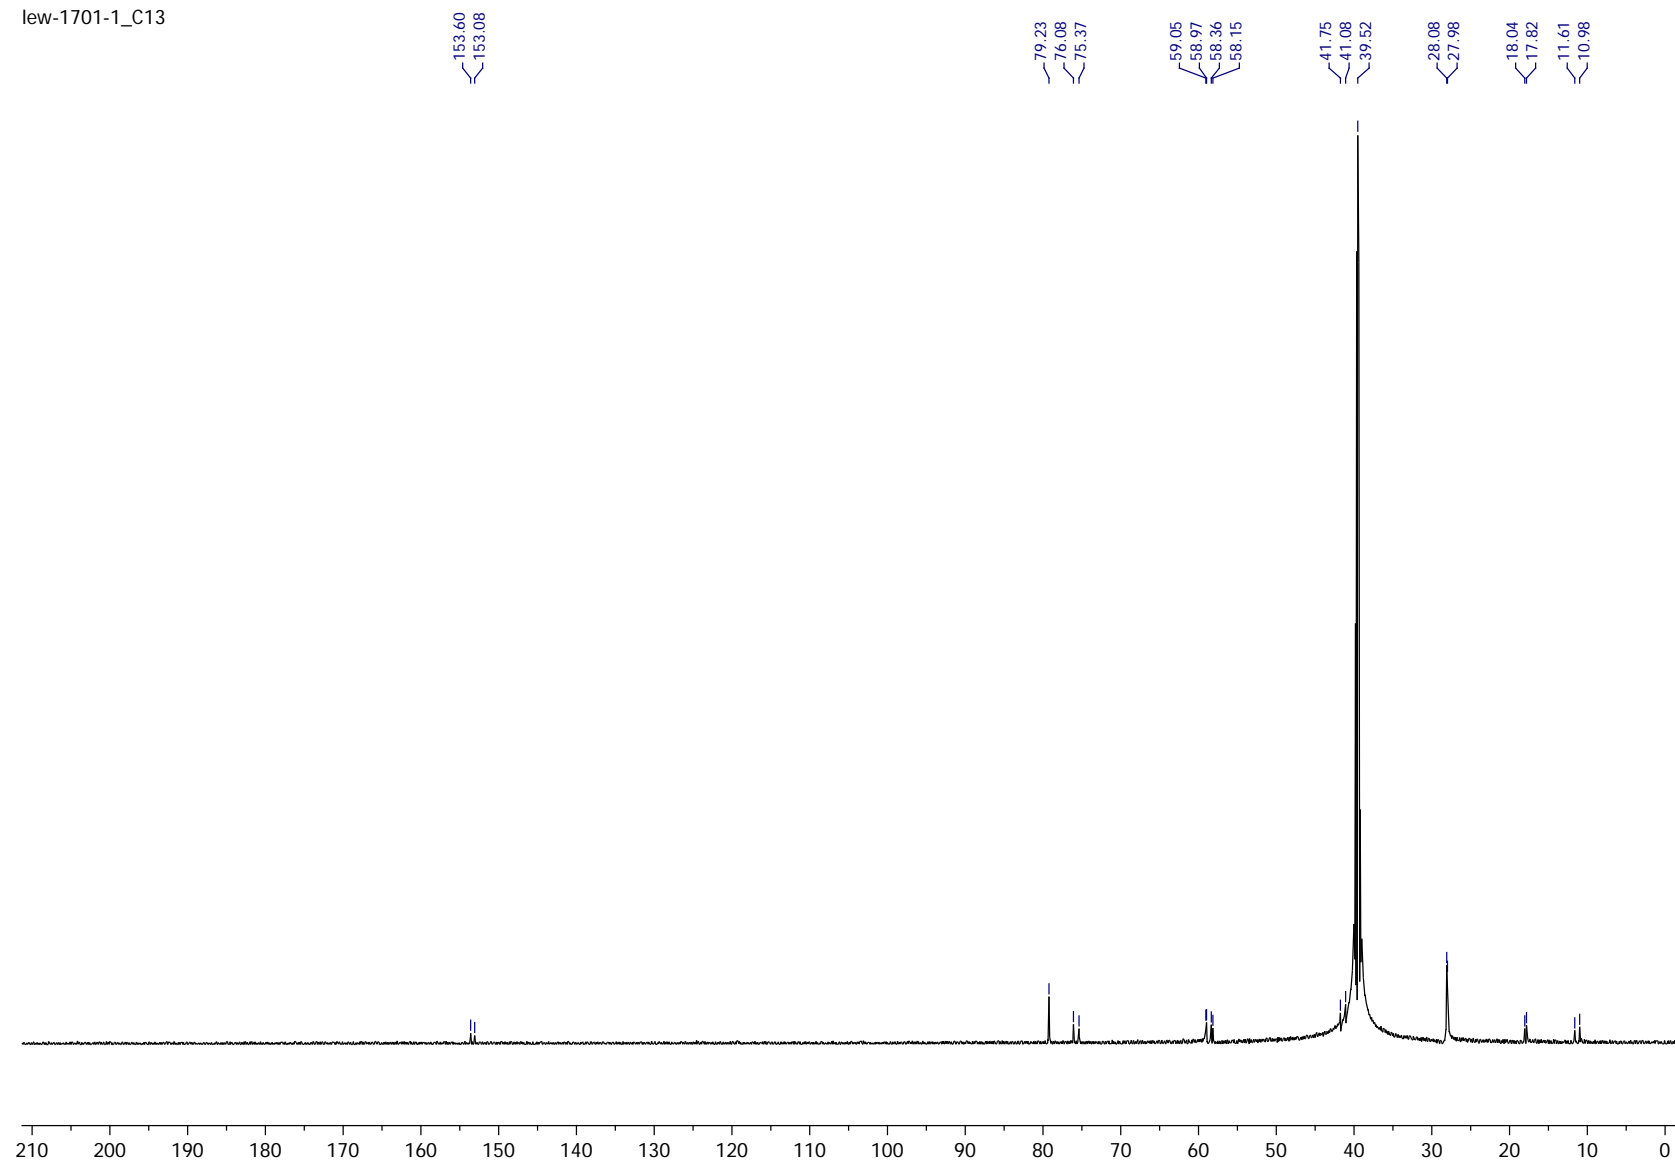



**1,3-Dioxoisindolin-2-yl 2-(5-oxaspiro[3.4]octan-6-yl)acetate (crude)**

WR33377

\_\_\_\_\_

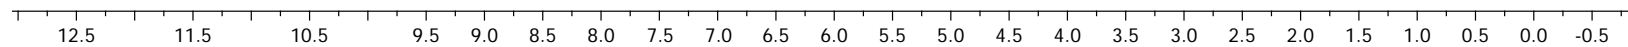

**Tert-butyl 3-(2-((1,3-dioxoisindolin-2-yl)oxy)-2-oxoethyl)-2-oxa-8-azaspiro[4.5]decane-8-carboxylate (crude)**

WR33378

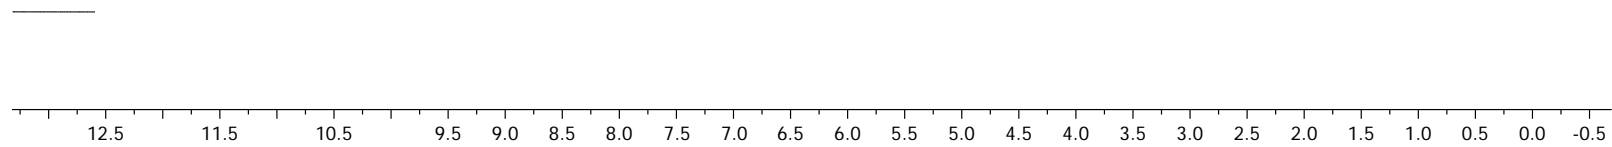

# 1,3-Dioxoisindolin-2-yl 2-(6-oxaspiro[3.5]nonan-7-yl)acetate (crude)

wr33238

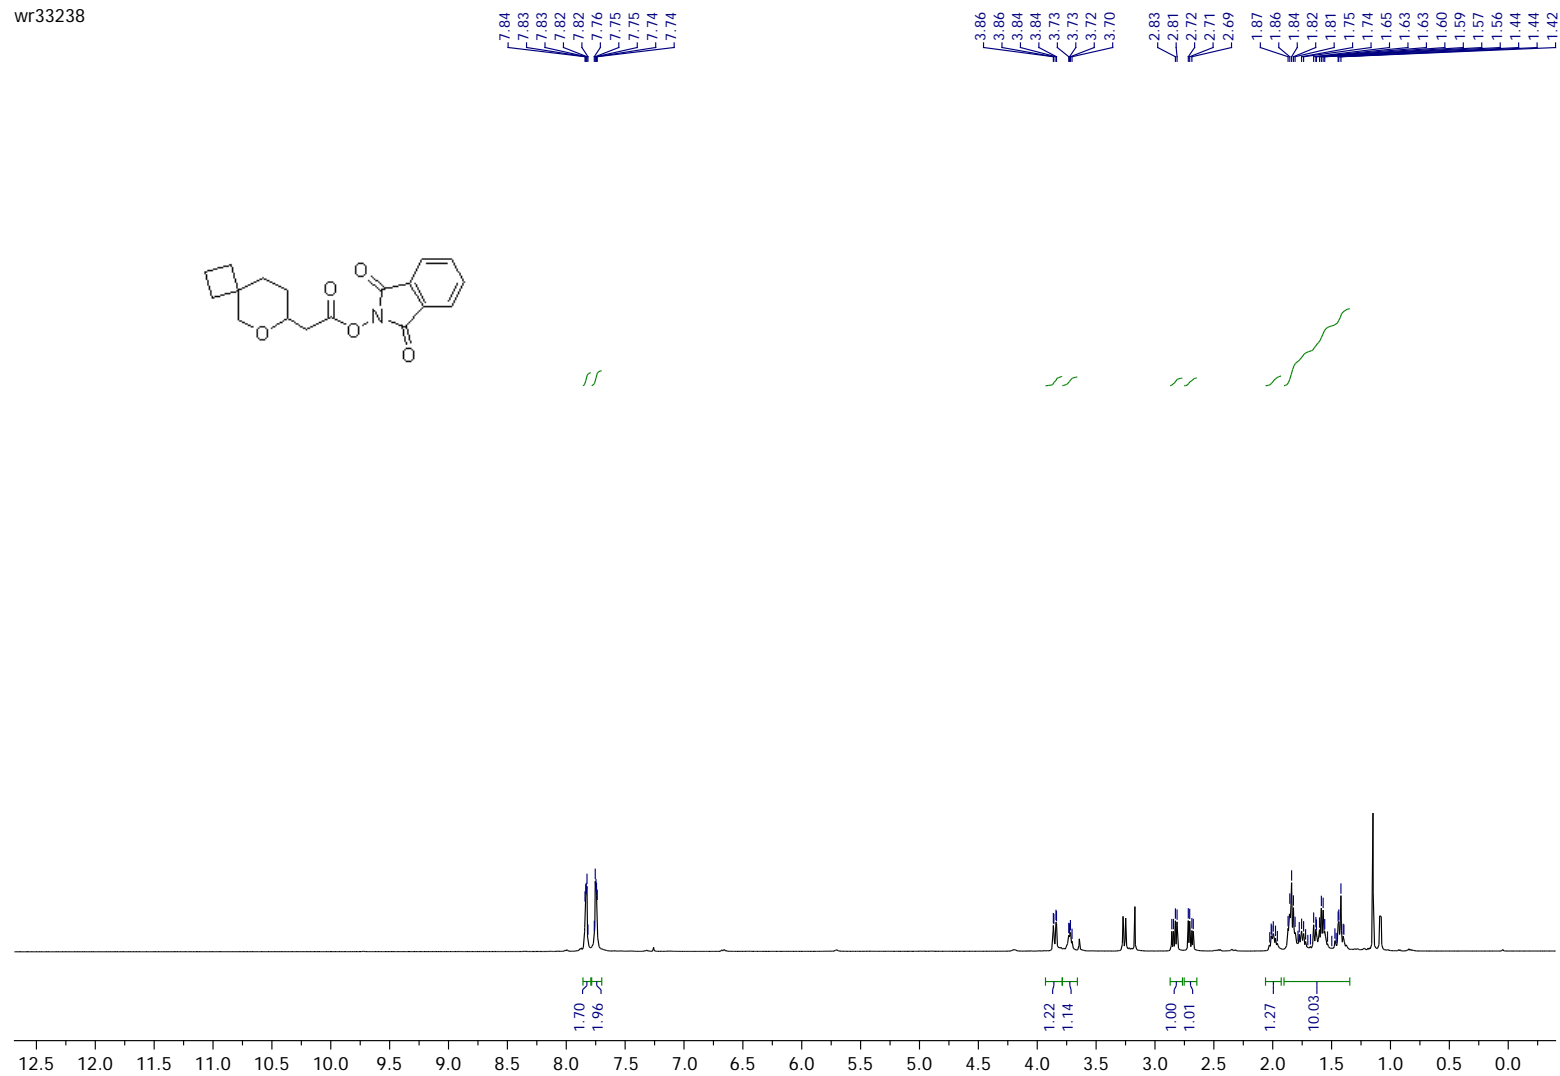

**1,3-Dioxoisindolin-2-yl 2-(2,9-dioxaspiro[5.5]undecan-3-yl)acetate**

wr33217

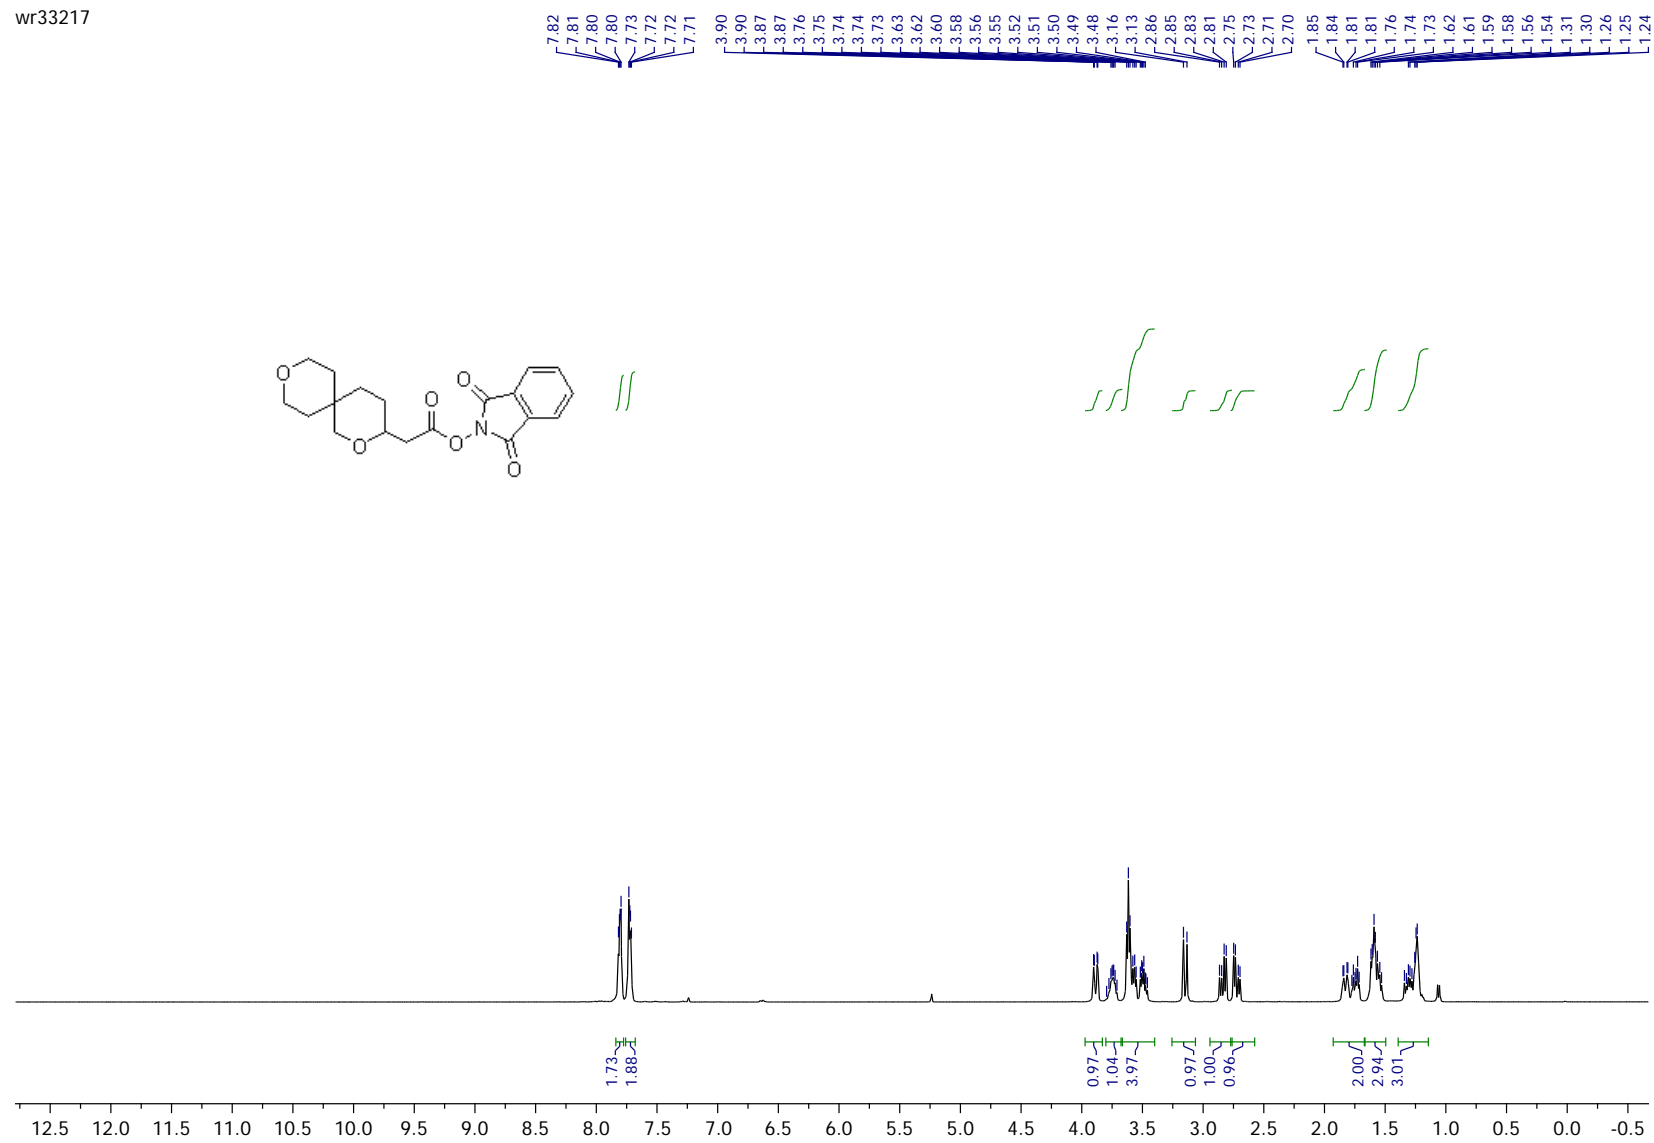

wr33217\_C13  
13C (1H-decoupled)

— 167.07  
— 161.77

— 134.80  
— 128.87  
— 123.94

77.16  
75.63  
74.31

63.82  
63.20

38.00  
35.84  
33.93  
31.56  
30.01  
26.61

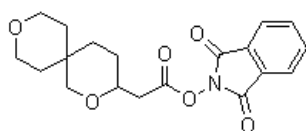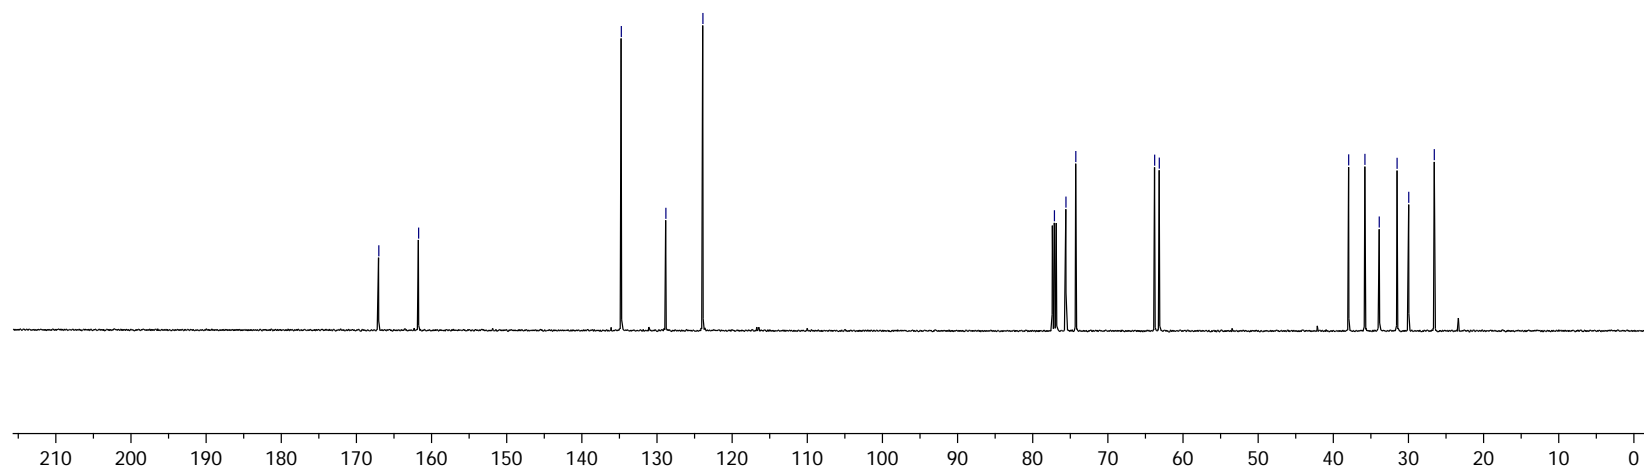

**Tert-butyl 6-(2-((1,3-dioxoisindolin-2-yl)oxy)-2-oxoethyl)-5-oxa-2-azaspiro[3.4]octane-2-carboxylate**

wr33325

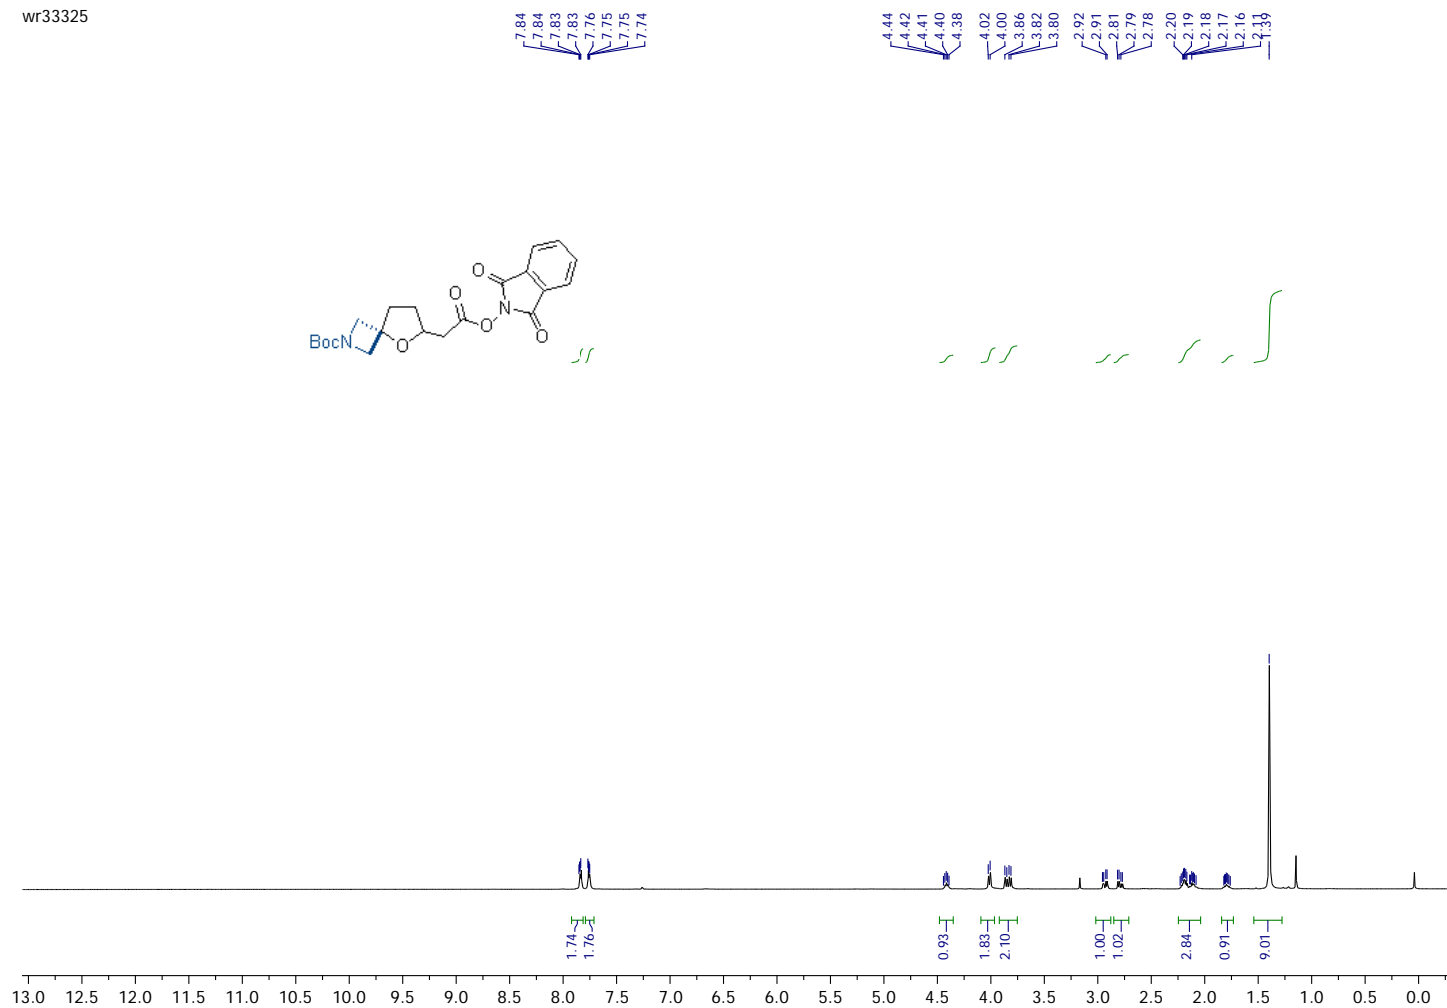

wr33325\_C13  
 13C (1H-decoupled)

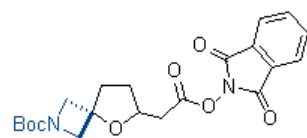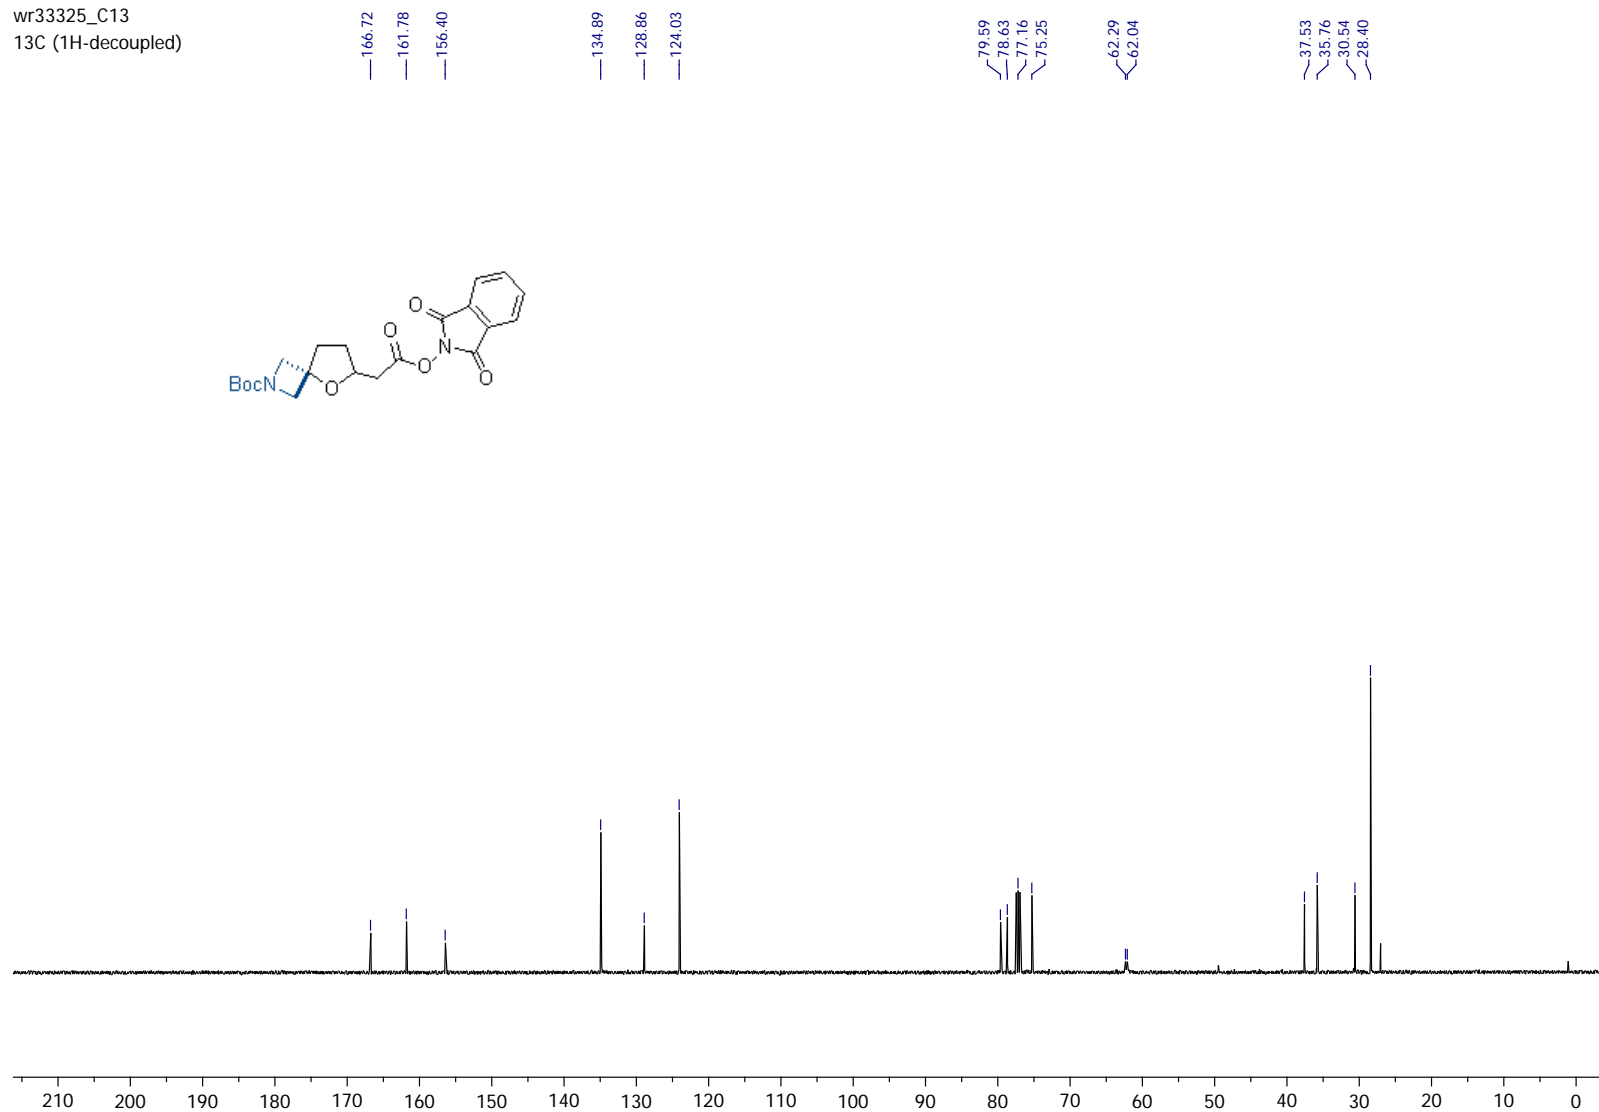



Compound 18j

wr32996

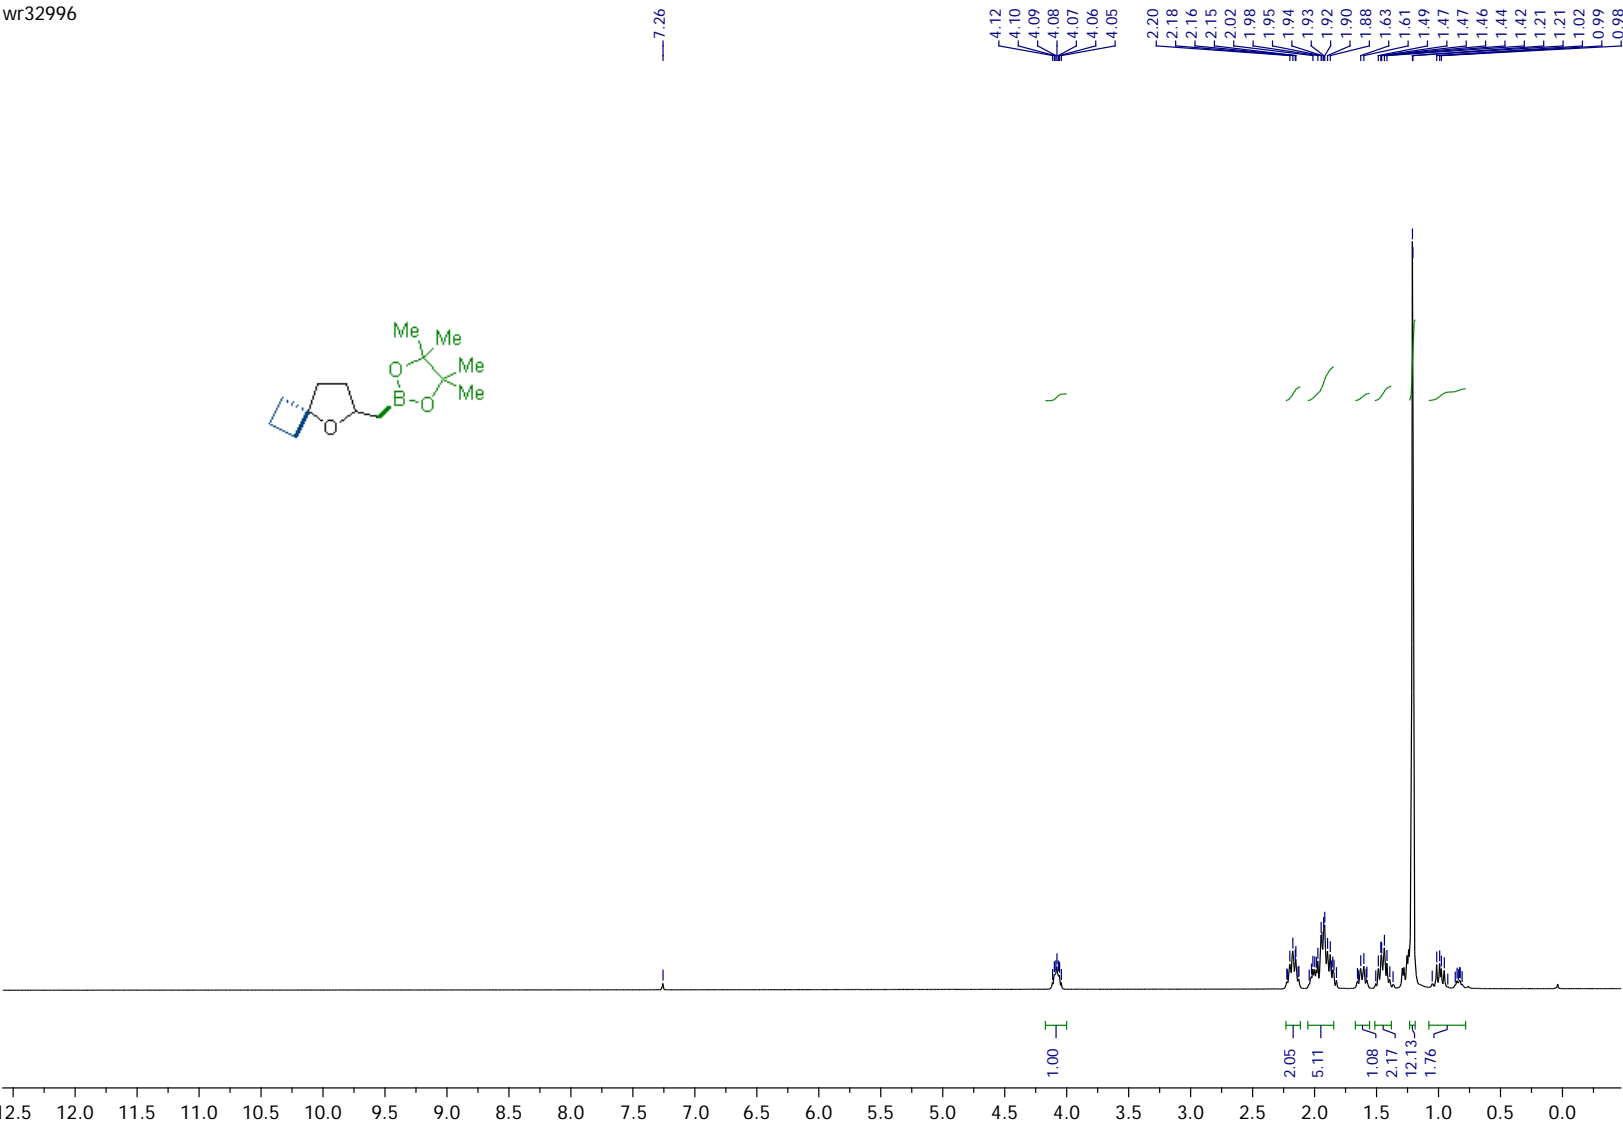

wr32996\_C13  
13C (1H-decoupled)

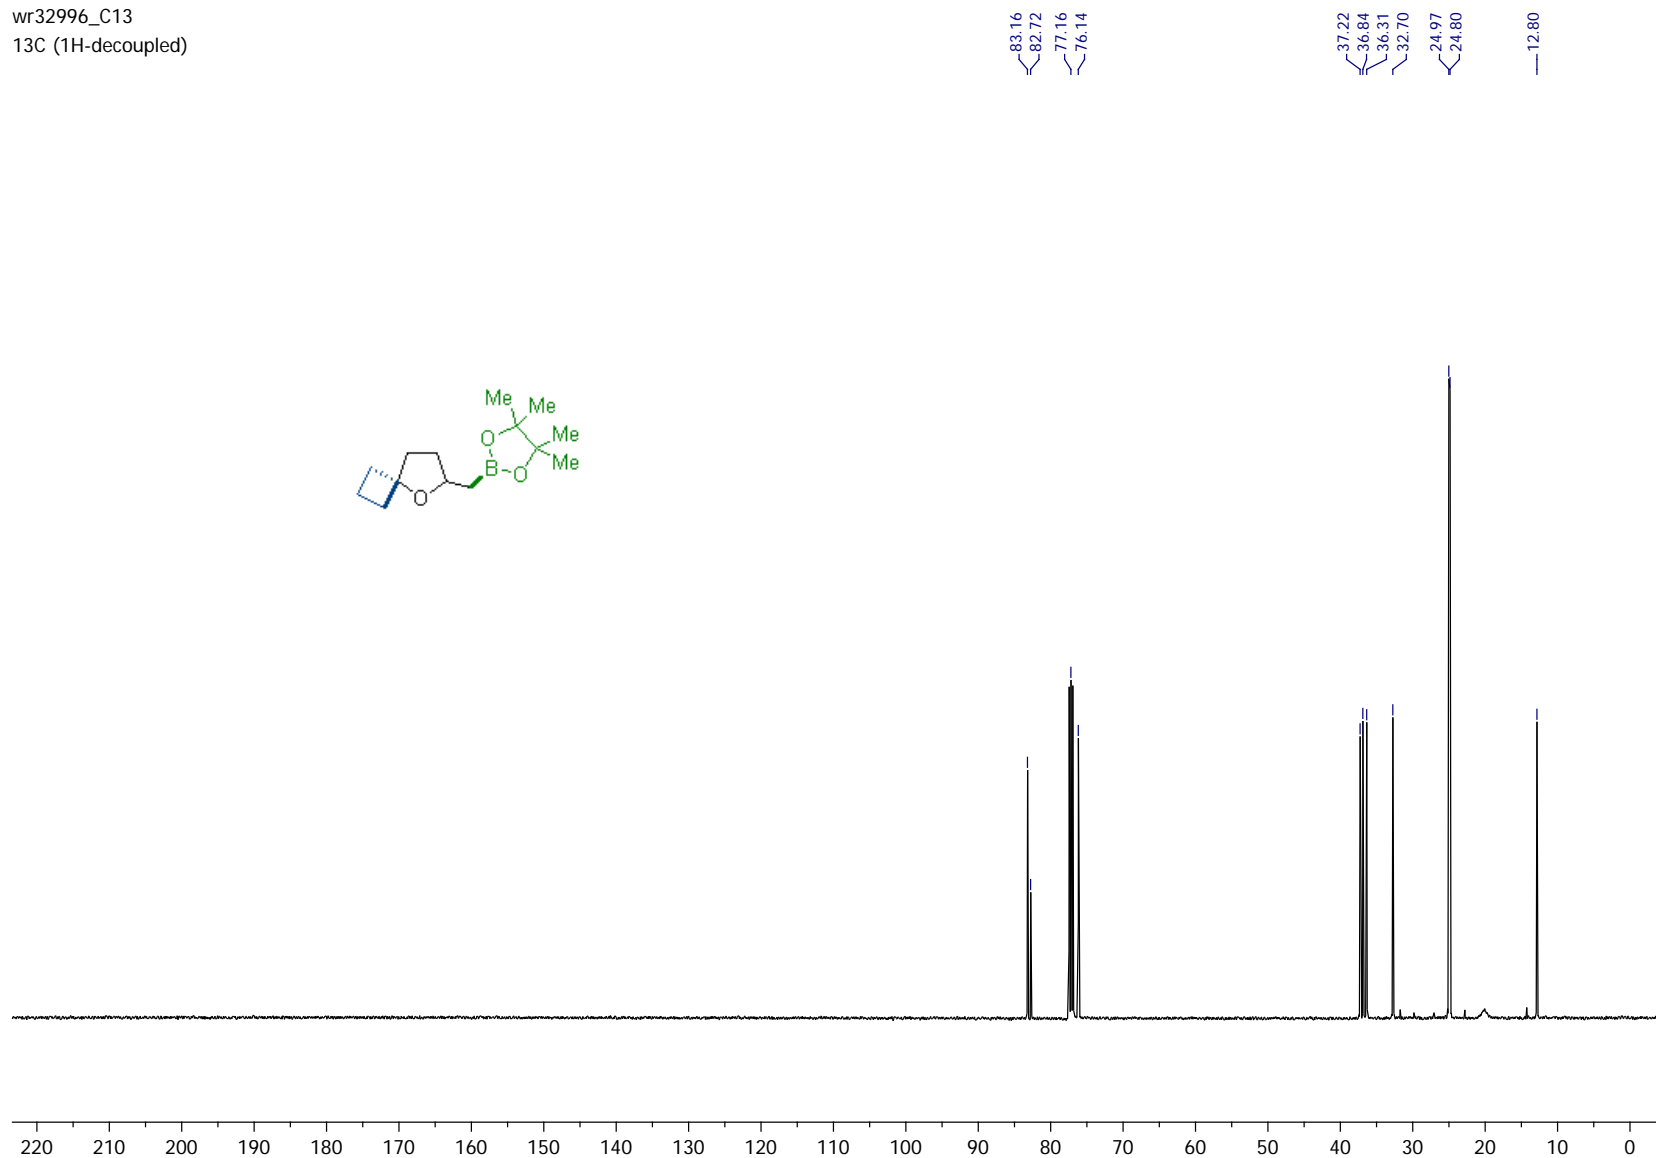

## Compound 14j

WR33382

\_\_\_\_\_

12.5 12.0 11.5 11.0 10.5 10.0 9.5 9.0 8.5 8.0 7.5 7.0 6.5 6.0 5.5 5.0 4.5 4.0 3.5 3.0 2.5 2.0 1.5 1.0 0.5 0.0 -0.5

WR33382\_C13

|||||

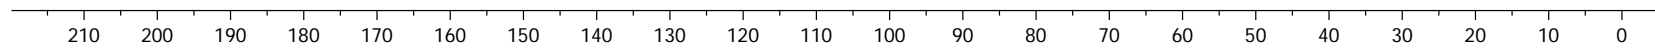

### Compound 34j

wr33282

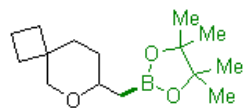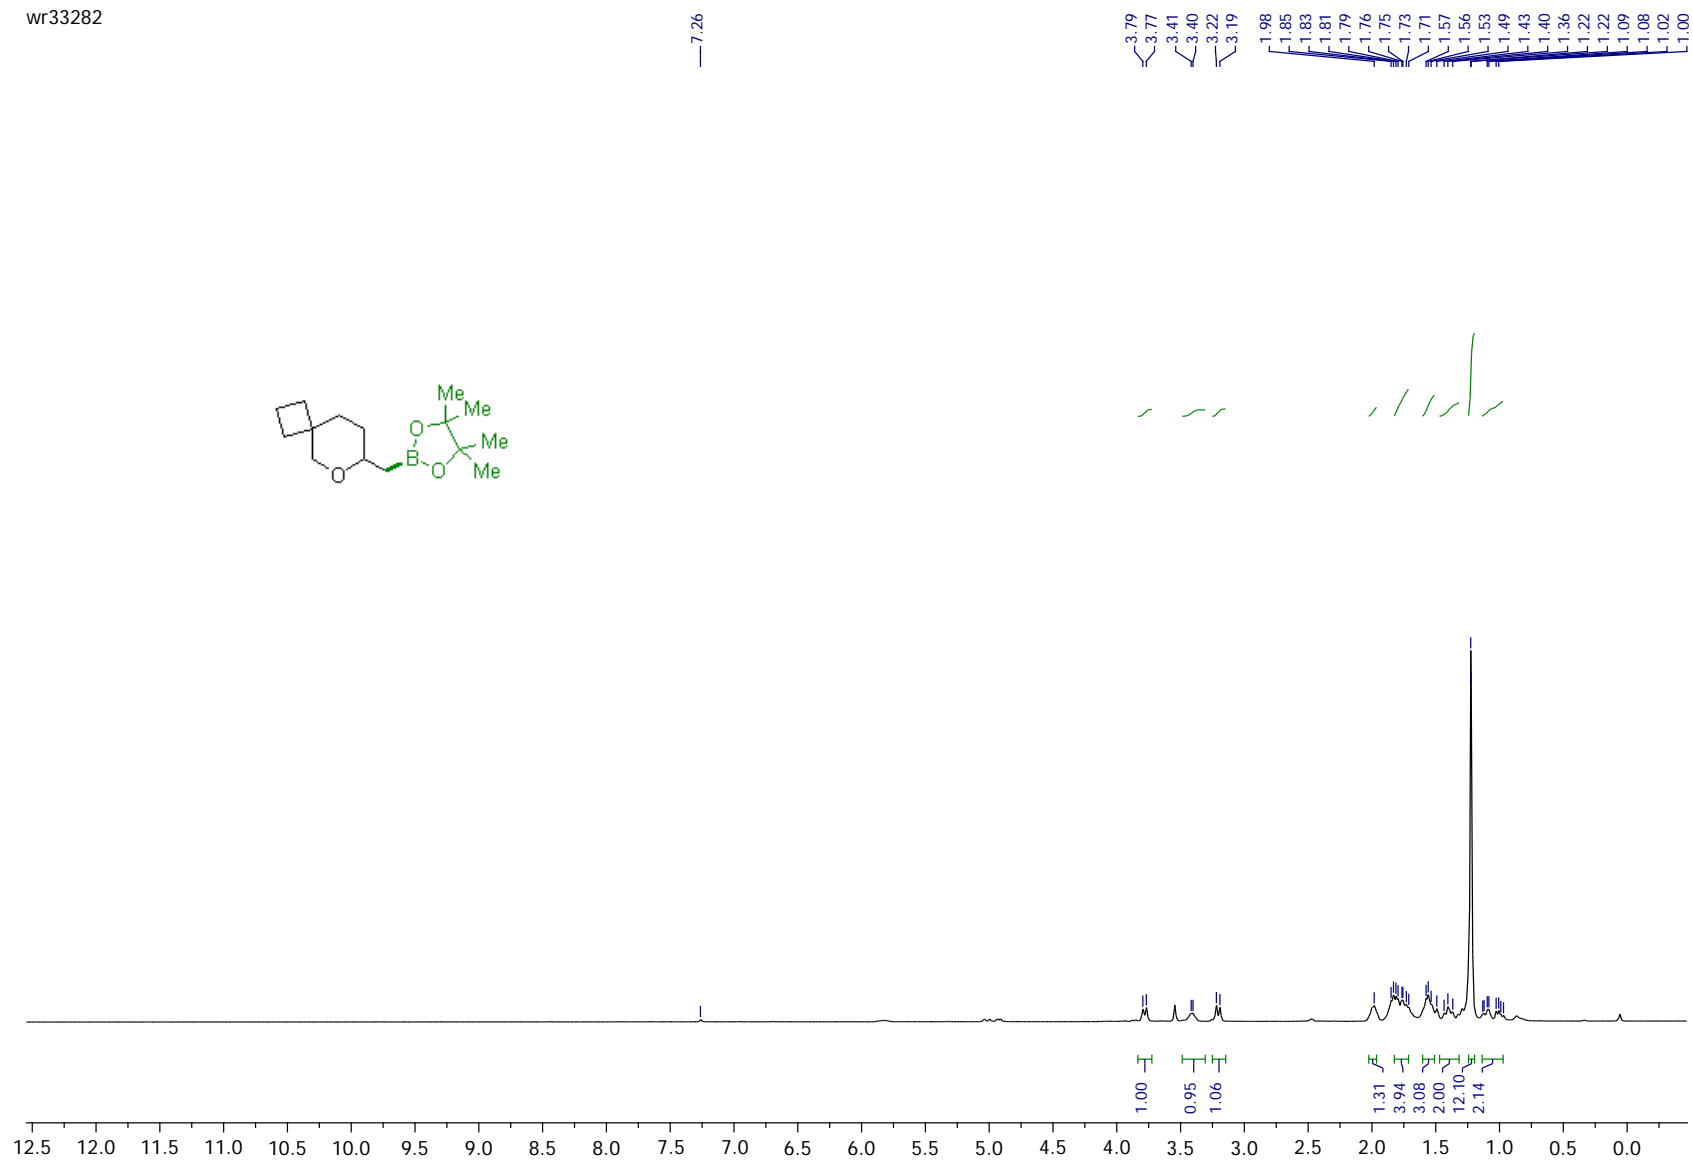

wr33282\_C13

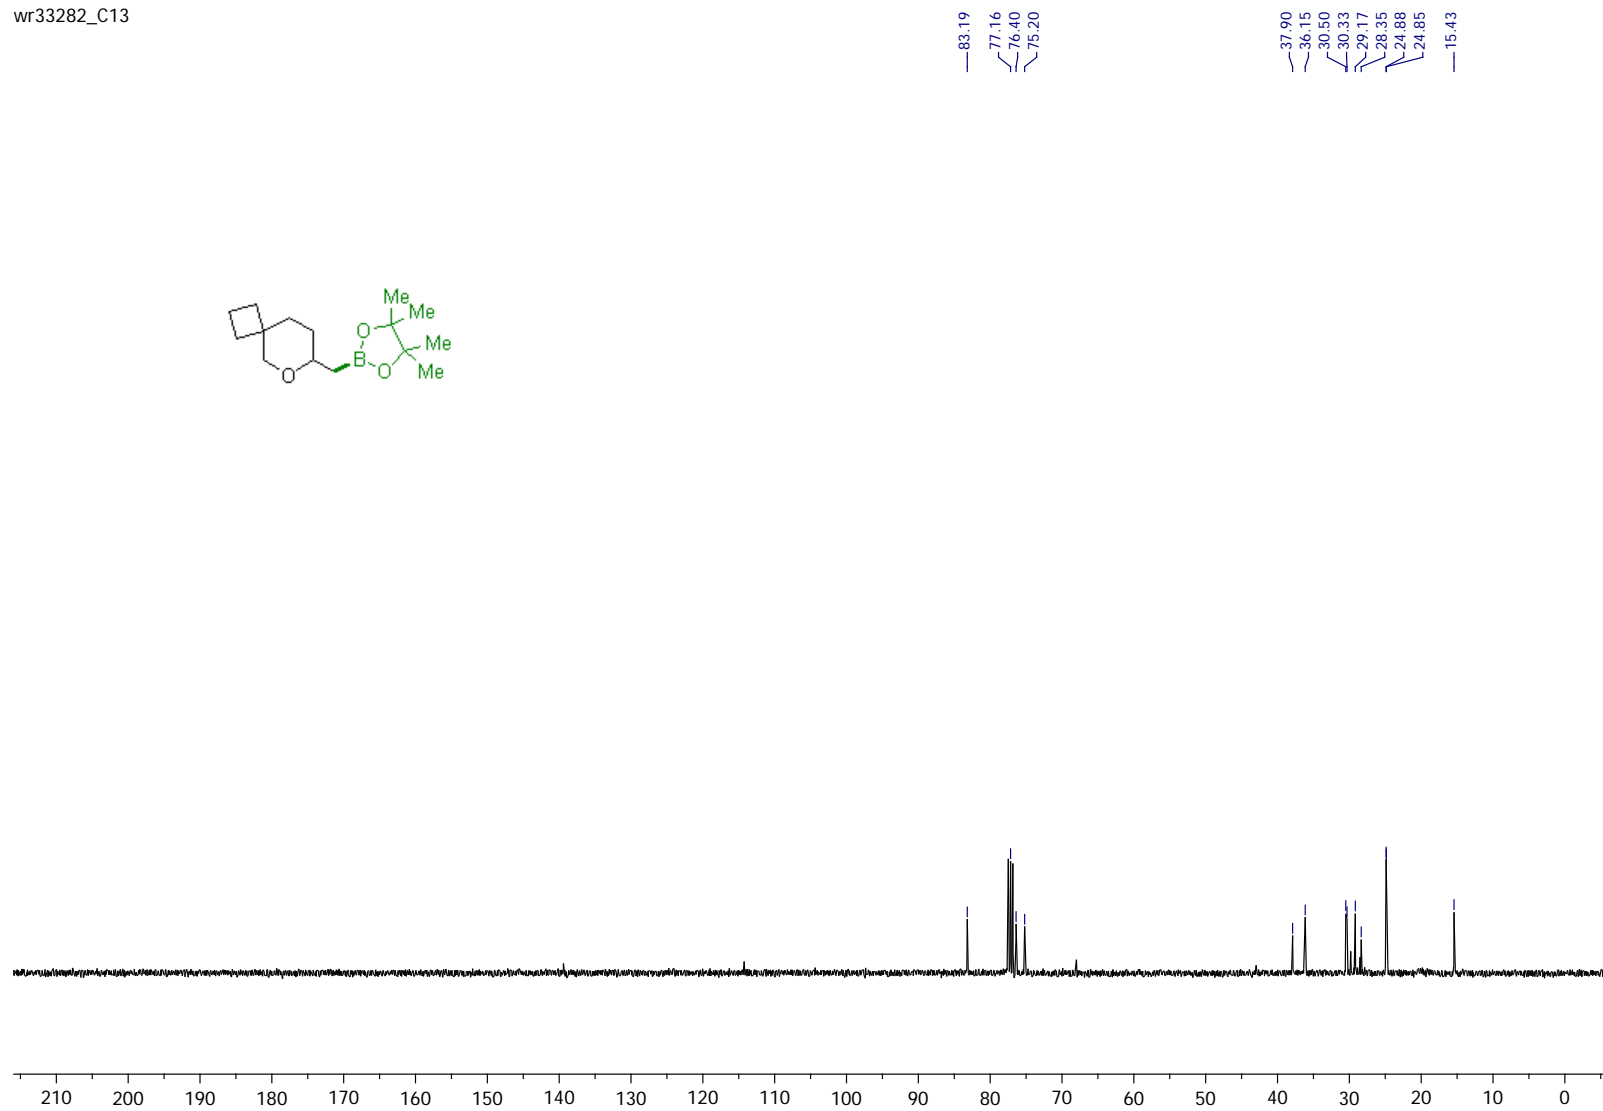

Compound 36j

wr33258

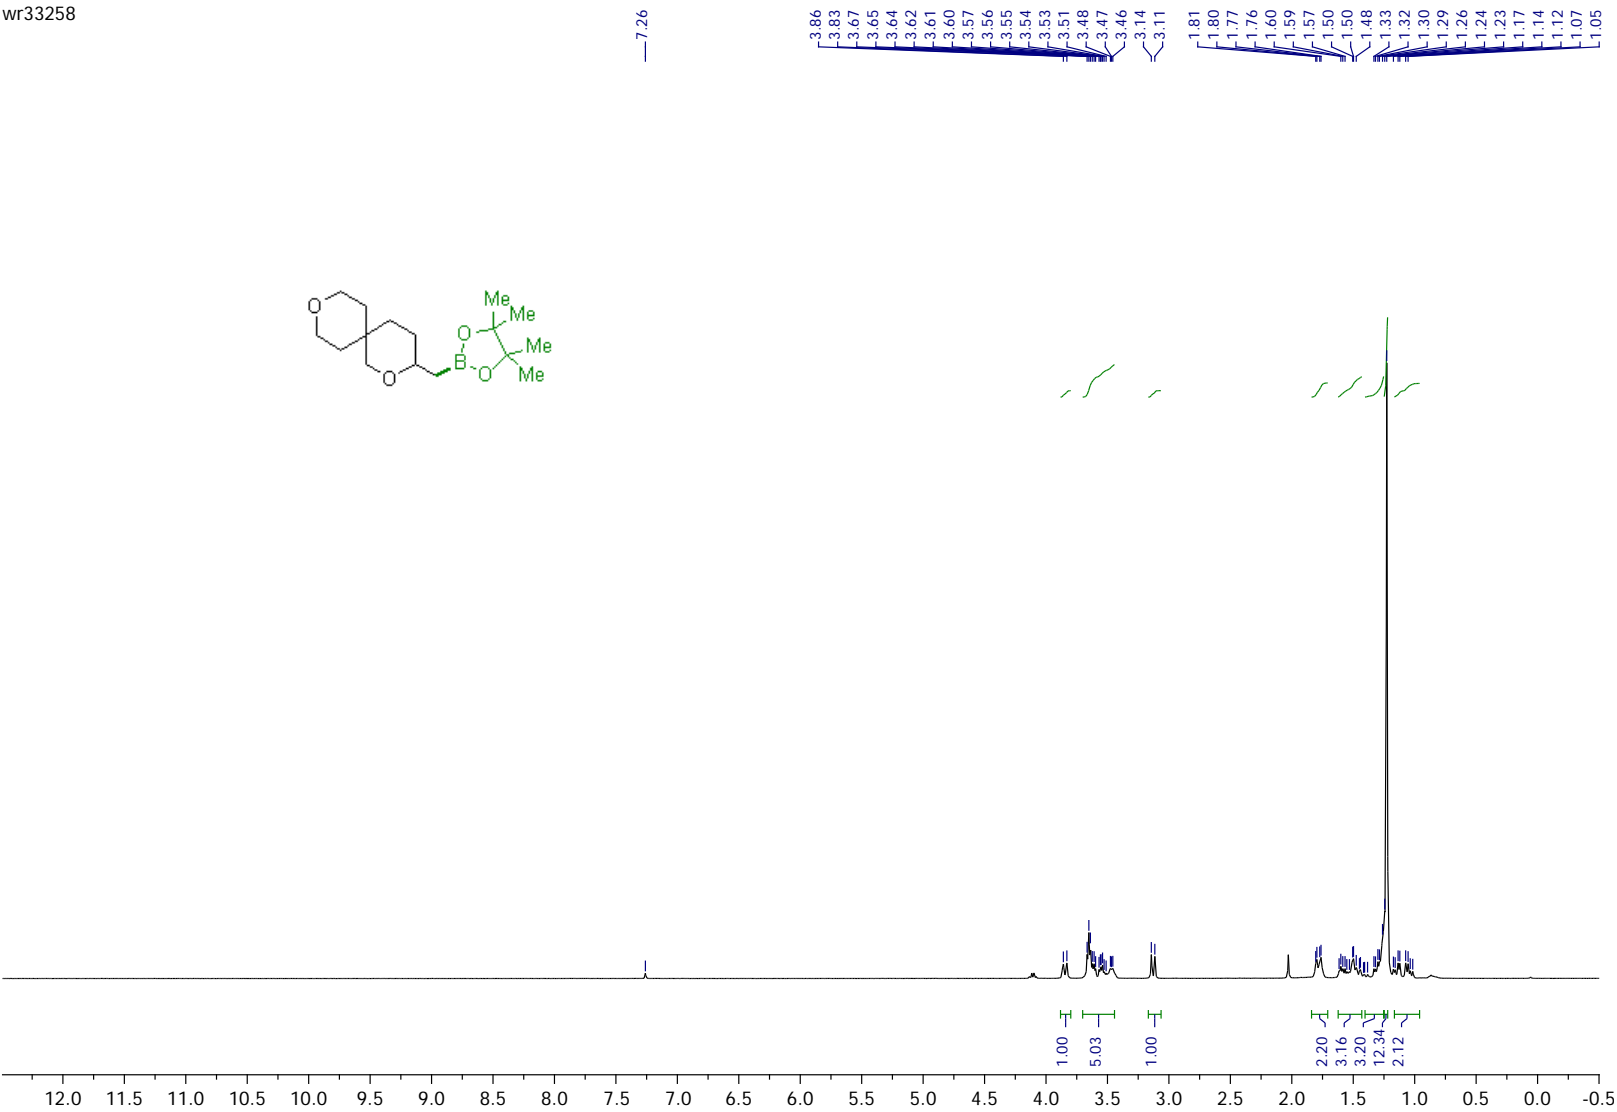

wr33258\_C13  
13C (1H-decoupled)

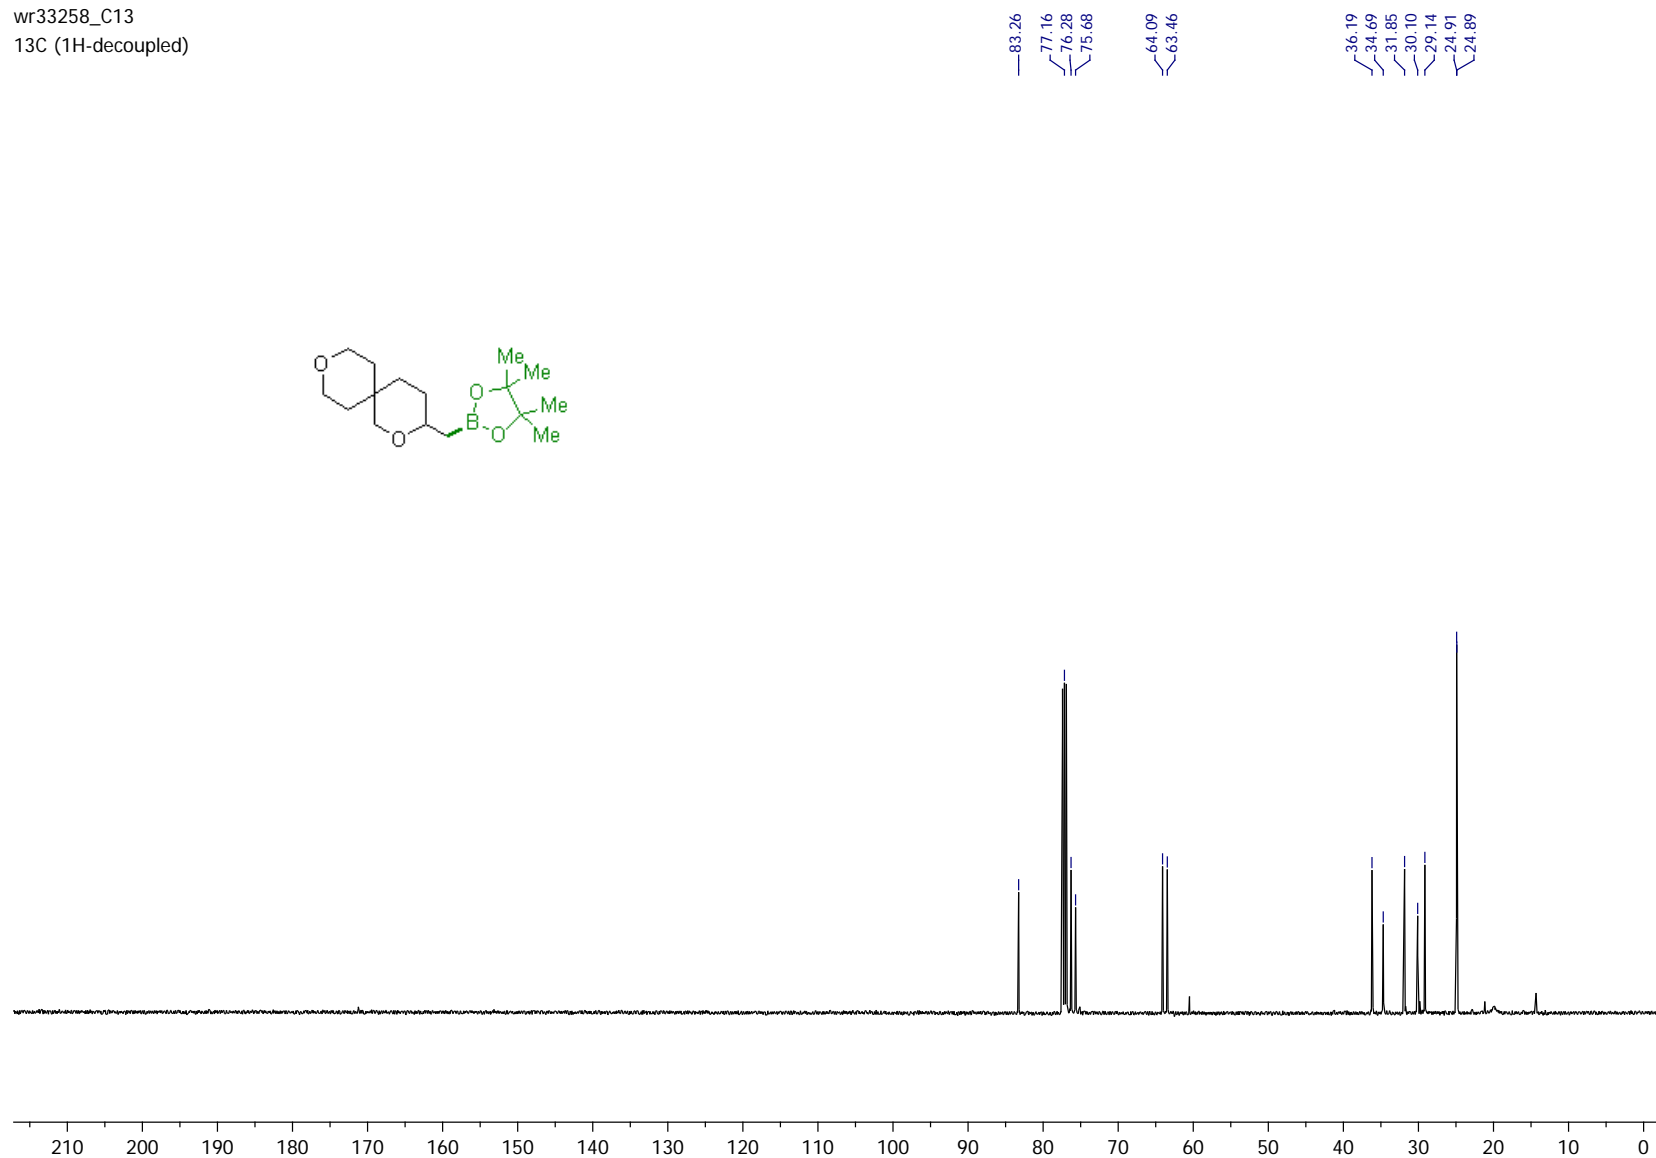



Compound 21j

wr33359

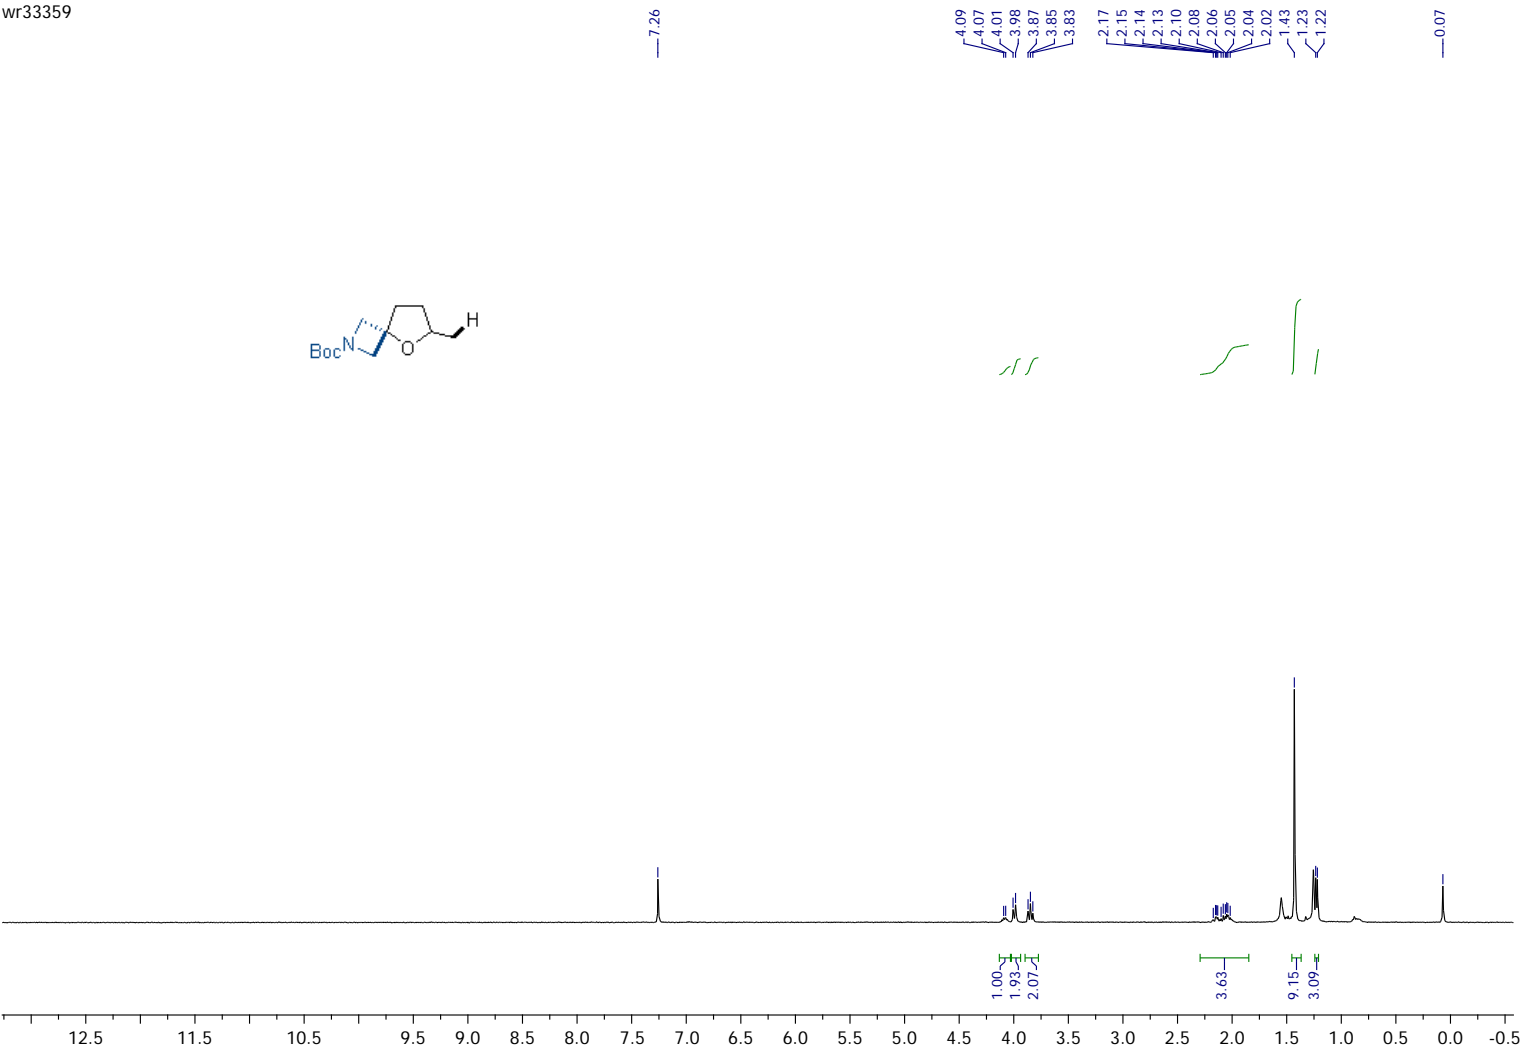

# Compound 75

MaxPeak: 100.00%  
Ret\_Time: 0.920 min

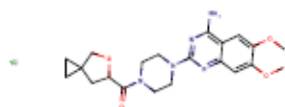

Mol Wt 449.93  
Exact Mass 413.23

| # | Time  | Area%  |
|---|-------|--------|
| 1 | 0.920 | 100.00 |

## Q527289-1

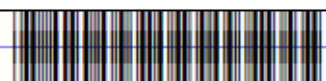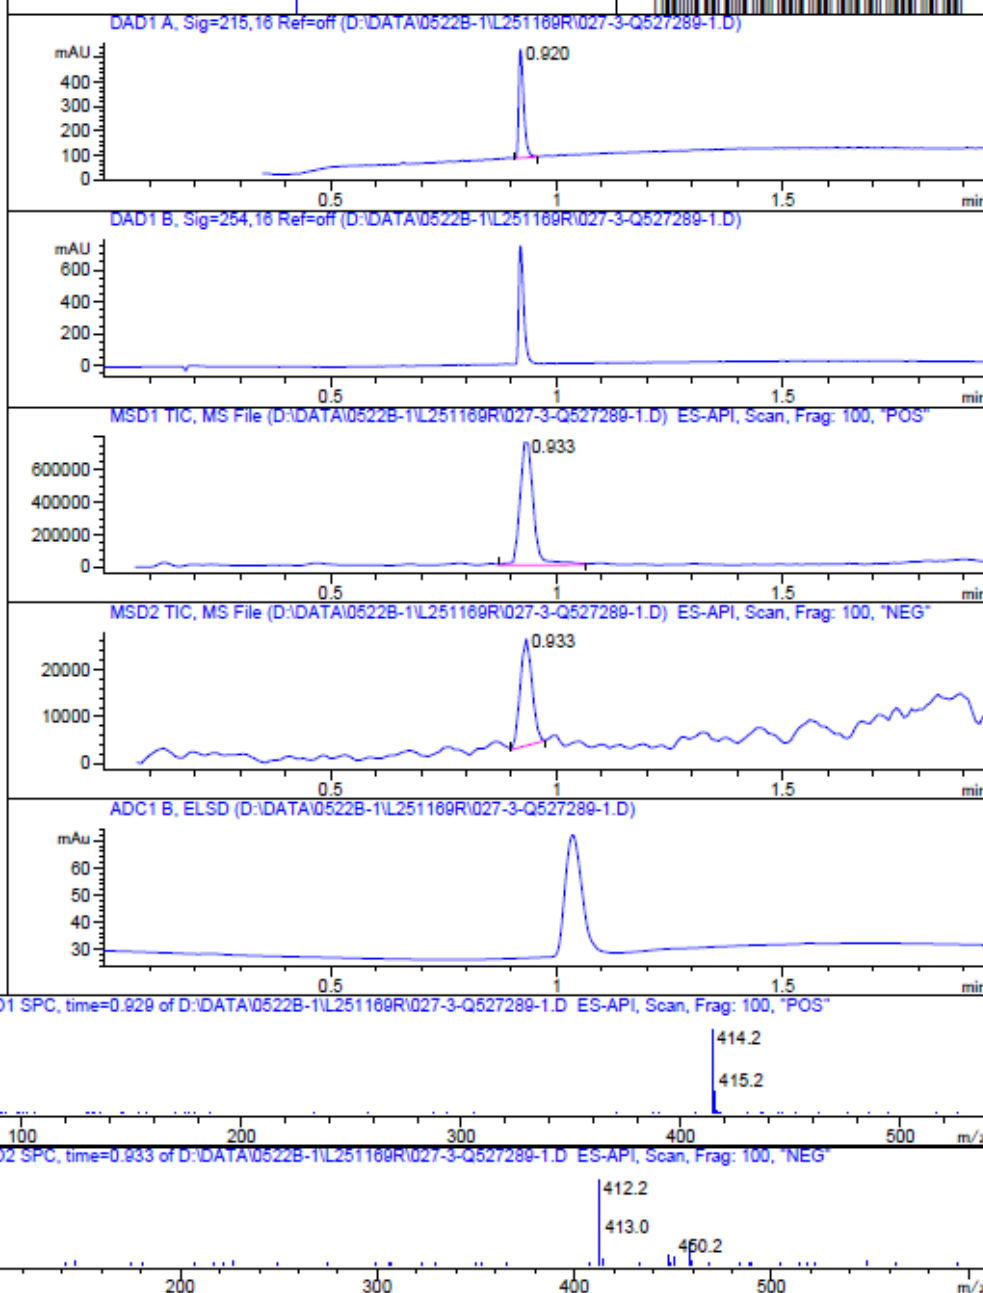

RT 0.933

RT 0.933

# Compound 76

MaxPeak: 97.45%  
Ret\_Time: 0.972 min

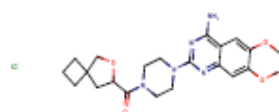

Mol Wt 463.96  
Exact Mass 427.25

| # | Time  | Area% |
|---|-------|-------|
| 1 | 0.972 | 97.45 |
| 2 | 1.012 | 2.55  |

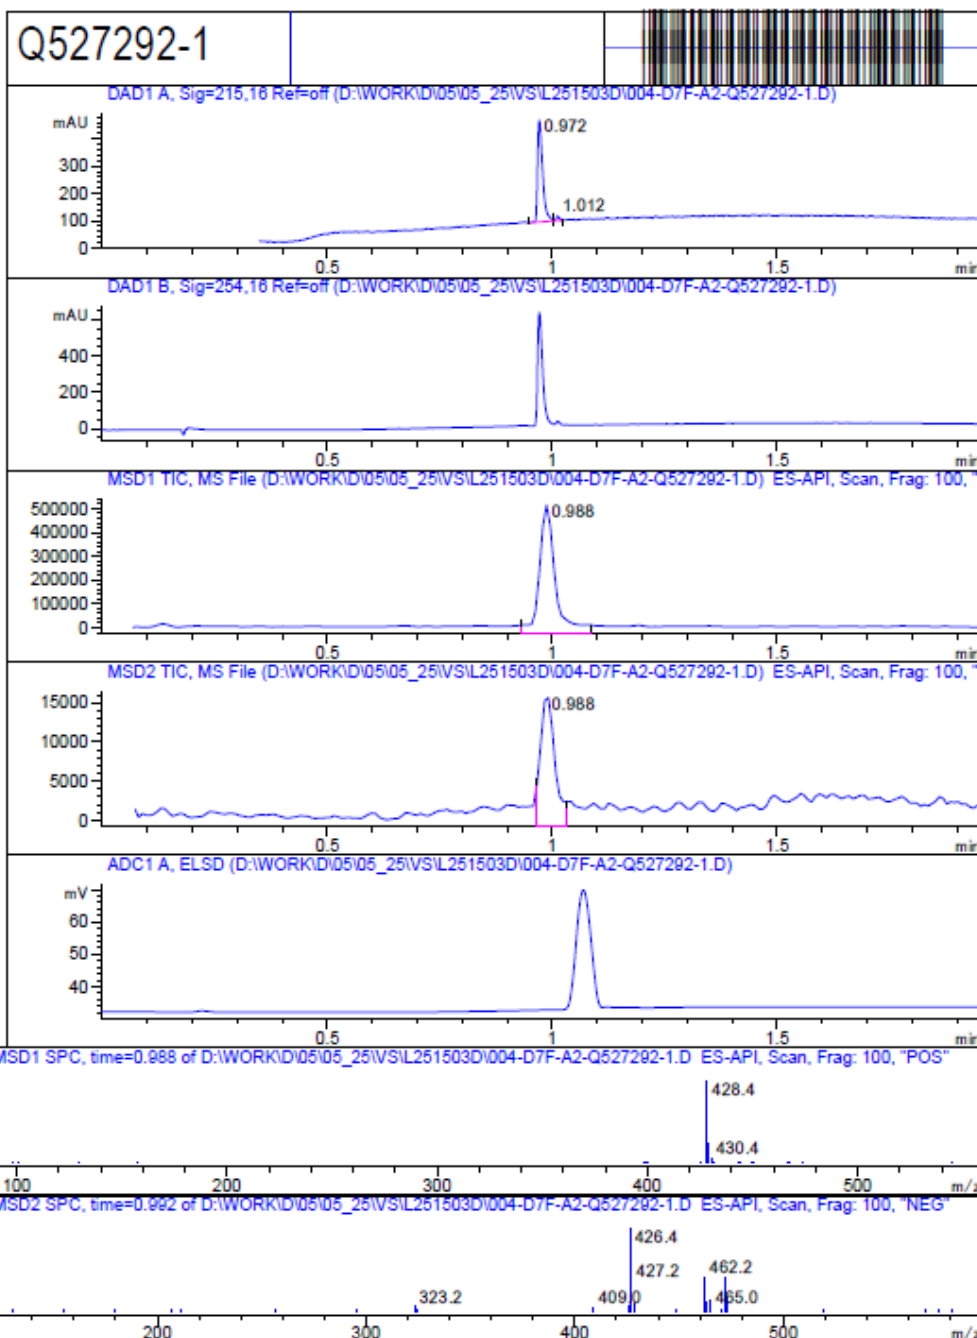

# Compound 77

MaxPeak: 97.58%  
Ret\_Time: 1.662 min

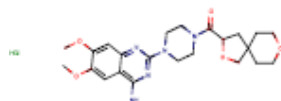

Mol Wt 493.98

Exact Mass 457.26

| # | Time  | Area% |
|---|-------|-------|
| 1 | 1.589 | 2.42  |
| 2 | 1.662 | 97.58 |

Q648376\$3

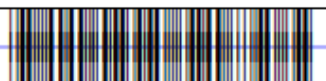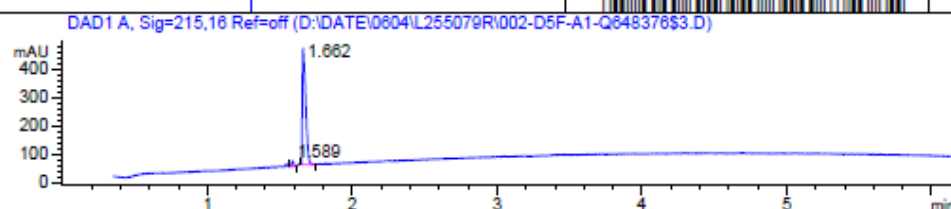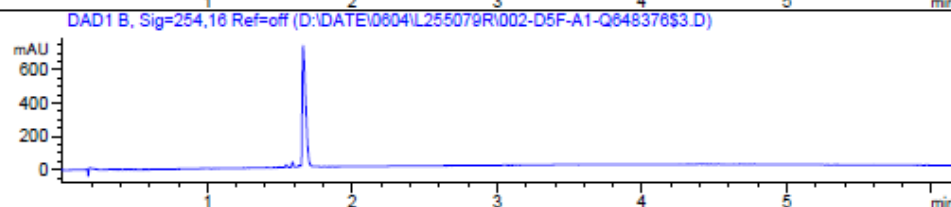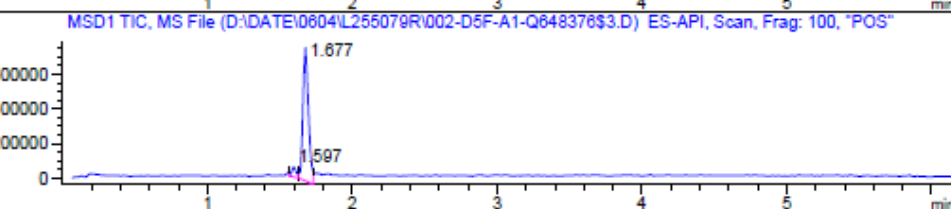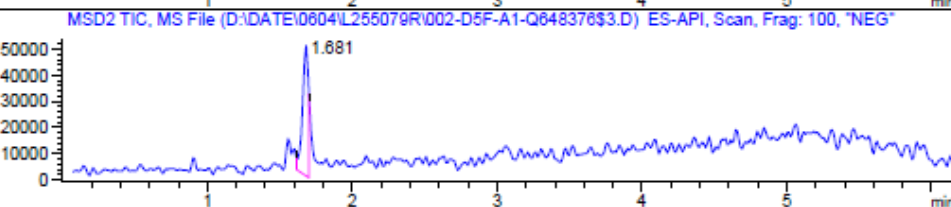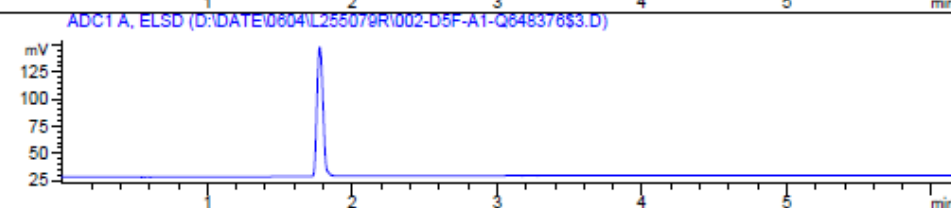

RT 1.597

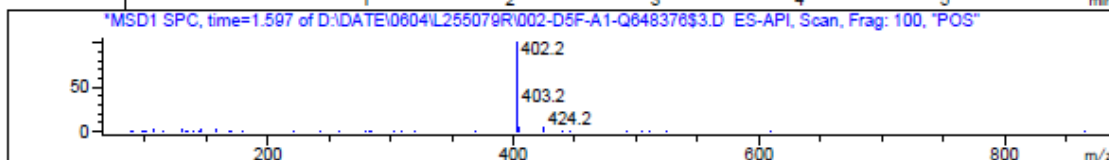

RT 1.677

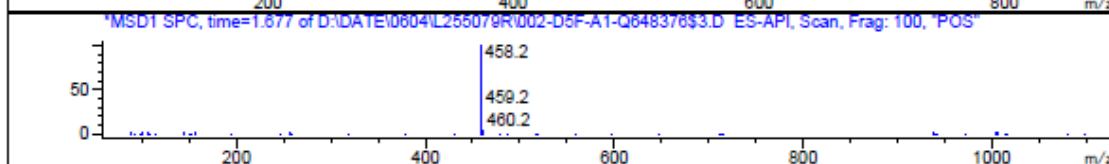

RT 1.681

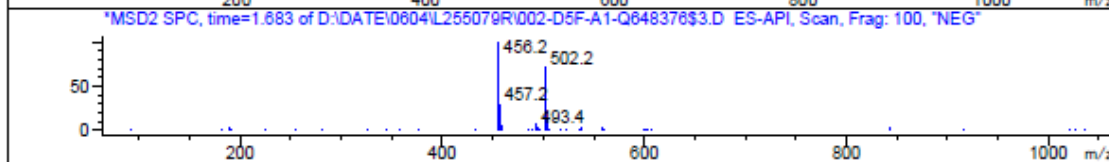

# Compound 78

MaxPeak: 100.00%  
Ret\_Time: 0.846 min

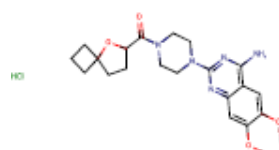

Mol Wt 463.96

Exact Mass 427.25

| # | Time  | Area%  |
|---|-------|--------|
| 1 | 0.846 | 100.00 |

Q527287-1

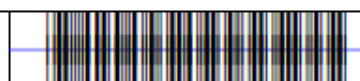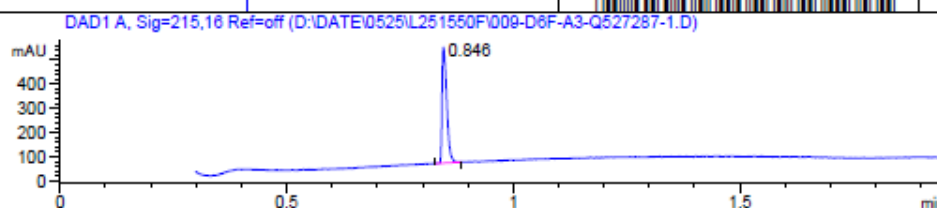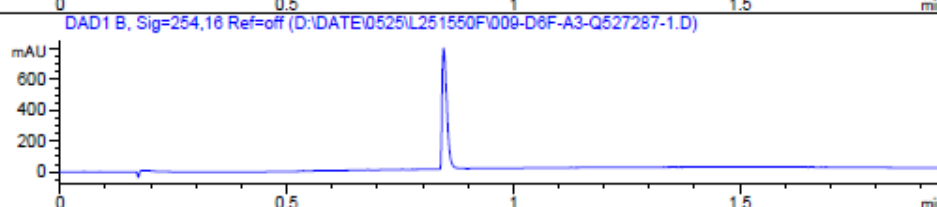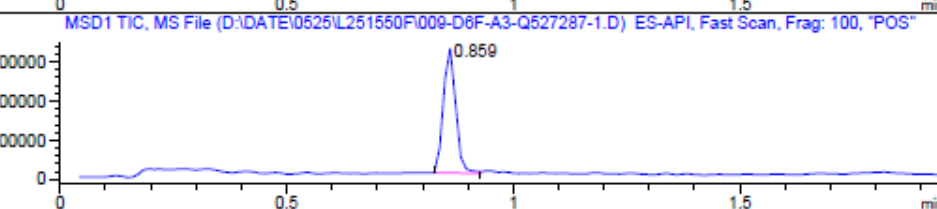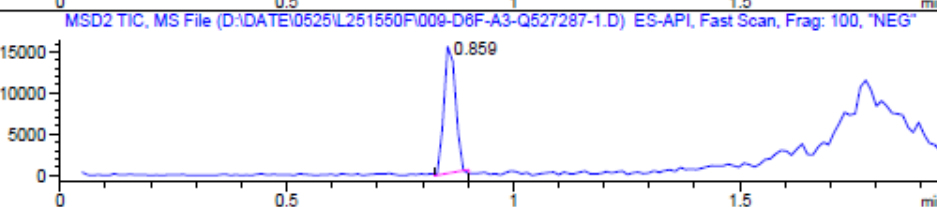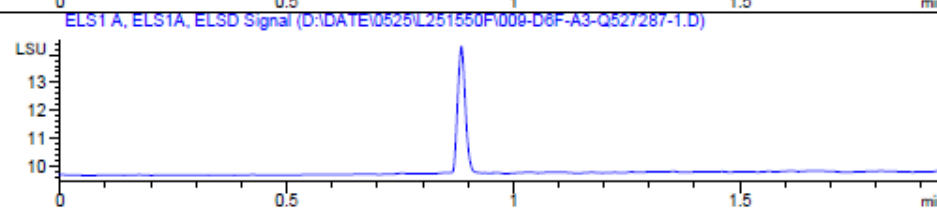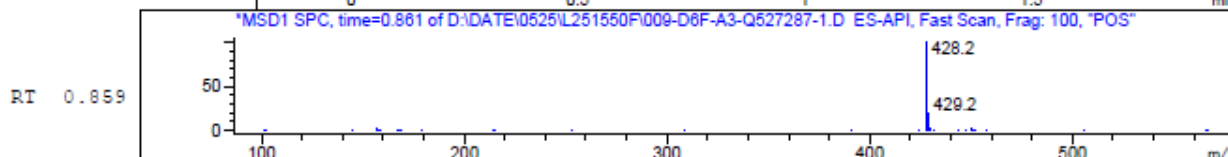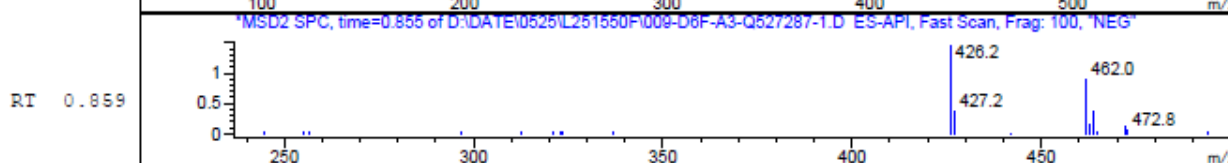

# Compound 79

MaxPeak: 100.00%  
Ret\_Time: 2.305 min

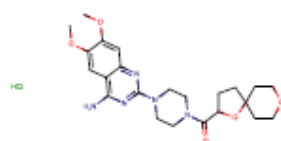

Mol Wt 493.98

Exact Mass 457.26

| # | Time  | Area%  |
|---|-------|--------|
| 1 | 2.305 | 100.00 |

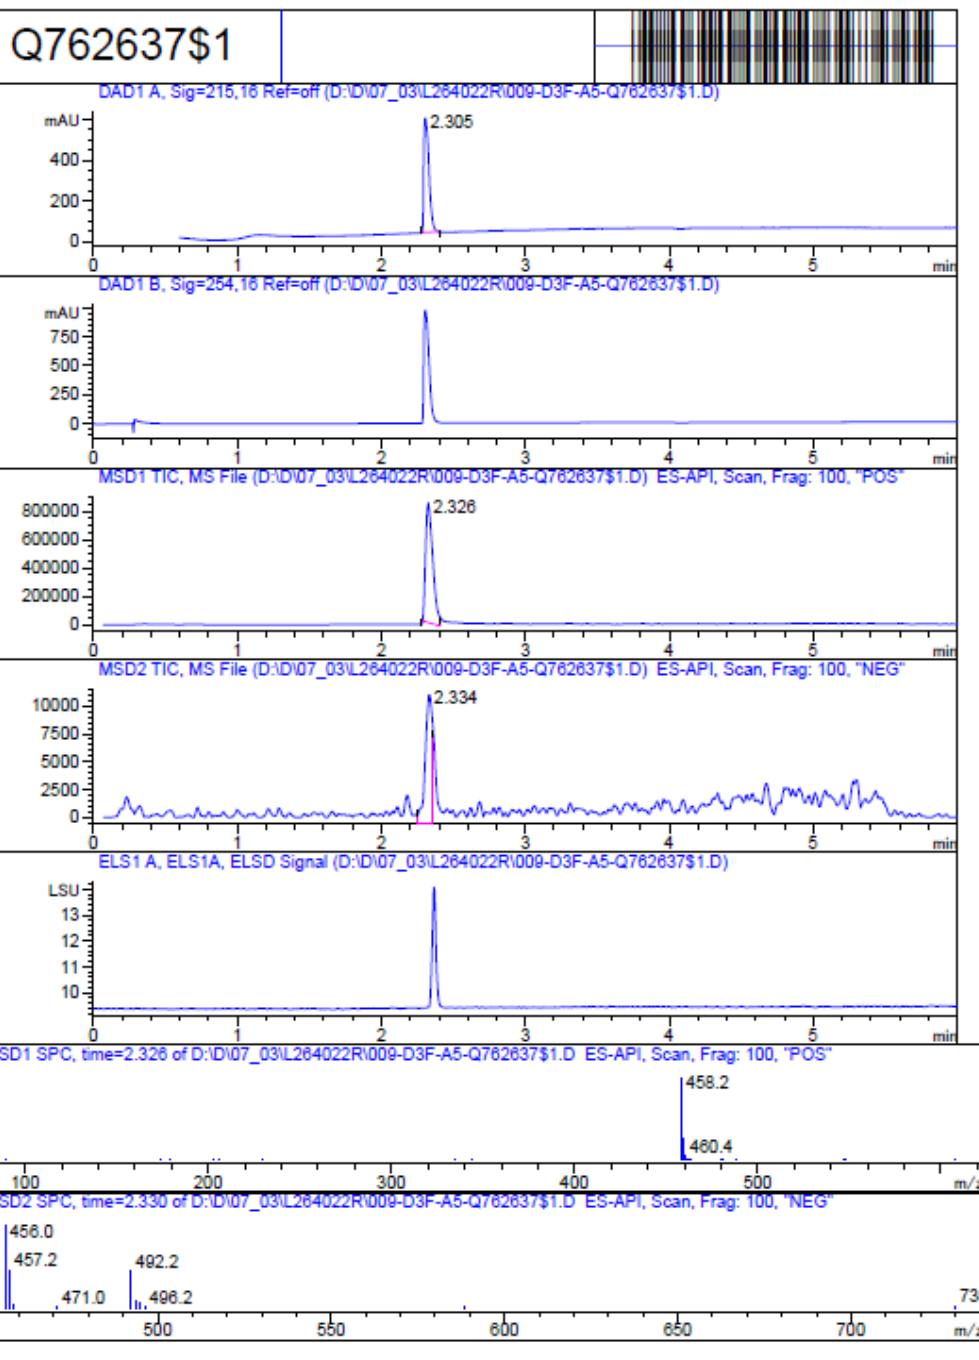

### Crystallographic data (X-Ray)

Crystals of compound **50** suitable for X-Ray diffraction studies were obtained by a low evaporation of a solution in methanol. Diffraction data were collected at room temperature on an Xcalibur-3 diffractometer with graphite-monochromated Mo K $\alpha$  radiation ( $\lambda = 0.71073$  Å) operating in the  $\omega$  scans mode. The structure was solved by direct methods and refined by the full-matrix least-squares technique in the anisotropic approximation for non-hydrogen atoms using the SHELXTL program package. Crystallographic data in this paper have been deposited at Cambridge Crystallographic Data Centre. Copies of the data can be obtained, free of charge, on application to CCDC, 12 Union Road, Cambridge CB21EZ, UK, (fax: +44-(0)1223-336033 or e-mail: [deposit@ccdc.cam.ac.uk](mailto:deposit@ccdc.cam.ac.uk)).

**Structure 50** (CCDC number 2046173)

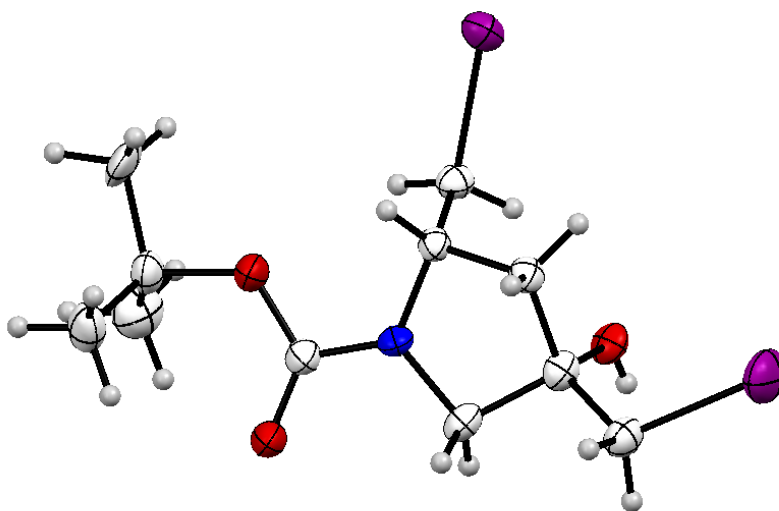

**Figure S9.** Molecular structure of **50** according to X-ray diffraction data. Thermal ellipsoids are shown at 50% probability level.

#### Crystal structure determination of **50**

data\_xr341

|                              |                   |
|------------------------------|-------------------|
| _audit_creation_method       | 'SHELXL-2016/4'   |
| _shelx_SHELXL_version_number | '2016/4'          |
| _chemical_formula_moiety     | 'C11 H19 I2 N O3' |
| _chemical_formula_sum        | 'C11 H19 I2 N O3' |
| _chemical_formula_weight     | 467.07            |

|                                  |              |
|----------------------------------|--------------|
| _space_group_crystal_system      | monoclinic   |
| _space_group_IT_number           | 14           |
| _space_group_name_H-M_alt        | 'P 21/n'     |
| _space_group_name_Hall           | '-P 2yn'     |
| _space_group_symop_operation_xyz |              |
| _cell_length_a                   | 14.8354(10)  |
| _cell_length_b                   | 5.8785(4)    |
| _cell_length_c                   | 18.7559(12)  |
| _cell_angle_alpha                | 90           |
| _cell_angle_beta                 | 98.683(4)    |
| _cell_angle_gamma                | 90           |
| _cell_volume                     | 1616.95(19)  |
| _cell_formula_units_Z            | 4            |
| _cell_measurement_temperature    | 173(2)       |
| _cell_measurement_reflns_used    | 3543         |
| _cell_measurement_theta_min      | 2.20         |
| _cell_measurement_theta_max      | 24.11        |
| _exptl_crystal_description       | 'needle'     |
| _exptl_crystal_colour            | 'colourless' |
| _exptl_crystal_density_diffn     | 1.919        |
| _exptl_crystal_F_000             | 888          |
| _exptl_crystal_size_max          | 0.480        |
| _exptl_crystal_size_mid          | 0.080        |
| _exptl_crystal_size_min          | 0.040        |
| _exptl_absorpt_coefficient_mu    | 3.888        |
| _shelx_estimated_absorpt_T_min   | 0.257        |
| _shelx_estimated_absorpt_T_max   | 0.860        |
| _exptl_absorpt_correction_type   | multi-scan   |



\_exptl\_absorpt\_correction\_T\_min 0.5103  
 \_exptl\_absorpt\_correction\_T\_max 0.7453  
 \_exptl\_absorpt\_process\_details SADABS  
 \_exptl\_absorpt\_special\_details ?  
 \_diffn\_ambient\_temperature 173(2)  
 \_diffn\_radiation\_wavelength 0.71073  
 \_diffn\_radiation\_type MoK $\alpha$   
 \_diffn\_source 'sealed tube'  
 \_diffn\_measurement\_device\_type 'Bruker APEX-II CCD'  
 \_diffn\_measurement\_method '\f and \w scans'  
 \_diffn\_reflns\_number 10169  
 \_diffn\_reflns\_av\_unetI/netI 0.0617  
 \_diffn\_reflns\_av\_R\_equivalents 0.0549  
 \_diffn\_reflns\_limit\_h\_min -18  
 \_diffn\_reflns\_limit\_h\_max 17  
 \_diffn\_reflns\_limit\_k\_min -7  
 \_diffn\_reflns\_limit\_k\_max 6  
 \_diffn\_reflns\_limit\_l\_min -22  
 \_diffn\_reflns\_limit\_l\_max 22  
 \_diffn\_reflns\_theta\_min 2.197  
 \_diffn\_reflns\_theta\_max 25.781  
 \_diffn\_reflns\_theta\_full 25.242  
 \_diffn\_measured\_fraction\_theta\_max 0.993  
 \_diffn\_measured\_fraction\_theta\_full 0.999  
 \_diffn\_reflns\_Laue\_measured\_fraction\_max 0.993  
 \_diffn\_reflns\_Laue\_measured\_fraction\_full 0.999  
 \_diffn\_reflns\_point\_group\_measured\_fraction\_max 0.993  
 \_diffn\_reflns\_point\_group\_measured\_fraction\_full 0.999

|                              |                  |
|------------------------------|------------------|
| _reflns_number_total         | 3085             |
| _reflns_number_gt            | 2443             |
| _reflns_threshold_expression | 'I > 2\sigma(I)' |
| _reflns_Friedel_coverage     | 0.000            |
